# Supplementary material
Source: PubMed Central journal article supplement (PMC3861710)
Supplement: supp_M113.031344_mcp.M113.031344-4.pdf [file supp_M113.031344_mcp.M113.031344-4.pdf]

# Protein groups

The Protein Groups table contains information on the identified proteins in the processed raw-files. Each single row contains the group of proteins that could be reconstructed from a set of peptides.

| Name                          | Separator | Description                                                                                                                                                                                                                                                 |
|-------------------------------|-----------|-------------------------------------------------------------------------------------------------------------------------------------------------------------------------------------------------------------------------------------------------------------|
| Protein IDs                   |           | Identifier(s) of protein(s) contained in the protein group. They are sorted by number of identified peptides in descending order.                                                                                                                           |
| Majority protein IDs          |           | These are the IDs of those proteins that have at least half of the peptides that the leading protein has.                                                                                                                                                   |
| Peptide counts (all)          |           | Number of peptides associated with each protein in protein group, occurring in the order as the protein IDs occur in the 'Protein IDs' column. Here distinct peptide sequences are counted. Modified forms or different charges are counted as one peptide. |
| Peptide counts (razor+unique) |           | Number of peptides associated with each protein in protein group, occurring in the order as the protein IDs occur in the 'Protein IDs' column. Here distinct peptide sequences are counted. Modified forms or different charges are counted as one peptide. |
| Peptide counts (unique)       |           | Number of peptides associated with each protein in protein group, occurring in the order as the protein IDs occur in the 'Protein IDs' column. Here distinct peptide sequences are counted. Modified forms or different charges are counted as one peptide. |
| Protein names                 |           | Name(s) of protein(s) contained within the group.                                                                                                                                                                                                           |
| Gene names                    |           | Name(s) of the gene(s) associated to the protein(s) contained within the group.                                                                                                                                                                             |
| Fasta headers                 |           | Fasta headers(s) of protein(s) contained within the group.                                                                                                                                                                                                  |
| Proteins                      |           | Number of proteins contained within the group. This corresponds to the number of entries in the column 'Protein IDs'.                                                                                                                                       |
| Peptides                      |           | The total number of peptide sequences associated with the protein group (i.e. for all the proteins in the group).                                                                                                                                           |
| Razor + unique peptides       |           | The total number of razor + unique peptides associated with the protein group (i.e. these peptides are shared with another protein group).                                                                                                                  |
| Unique peptides               |           | The total number of unique peptides associated with the protein group (i.e. these peptides are not shared with another protein group).                                                                                                                      |
| Peptides 0h_1                 |           |                                                                                                                                                                                                                                                             |
| Peptides 0h_2                 |           |                                                                                                                                                                                                                                                             |
| Peptides 0h_3                 |           |                                                                                                                                                                                                                                                             |
| Peptides BSA_1                |           |                                                                                                                                                                                                                                                             |
| Peptides BSA_2                |           |                                                                                                                                                                                                                                                             |
| Peptides BSA_3                |           |                                                                                                                                                                                                                                                             |
| Peptides FN_1                 |           |                                                                                                                                                                                                                                                             |
| Peptides FN_2                 |           |                                                                                                                                                                                                                                                             |
| Peptides FN_3                 |           |                                                                                                                                                                                                                                                             |
| Peptides GFR_1                |           |                                                                                                                                                                                                                                                             |
| Peptides GFR_2                |           |                                                                                                                                                                                                                                                             |
| Peptides GFR_3                |           |                                                                                                                                                                                                                                                             |
| Peptides LAM_1                |           |                                                                                                                                                                                                                                                             |
| Peptides LAM_2                |           |                                                                                                                                                                                                                                                             |
| Peptides LAM_3                |           |                                                                                                                                                                                                                                                             |
| Peptides Matr 12h_1           |           |                                                                                                                                                                                                                                                             |
| Peptides Matr 12h_2           |           |                                                                                                                                                                                                                                                             |
| Peptides Matr 12h_3           |           |                                                                                                                                                                                                                                                             |
| Peptides Matr 24h_1           |           |                                                                                                                                                                                                                                                             |
| Peptides Matr 24h_2           |           |                                                                                                                                                                                                                                                             |
| Peptides Matr 24h_3           |           |                                                                                                                                                                                                                                                             |
| Peptides Matr 30h_1           |           |                                                                                                                                                                                                                                                             |
| Peptides Matr 30h_2           |           |                                                                                                                                                                                                                                                             |
| Peptides Matr 30h_3           |           |                                                                                                                                                                                                                                                             |
| Peptides Matr dil_1           |           |                                                                                                                                                                                                                                                             |
| Peptides Matr dil_2           |           |                                                                                                                                                                                                                                                             |
| Peptides Matr dil_3           |           |                                                                                                                                                                                                                                                             |
| Razor + unique peptides 0h_1  |           |                                                                                                                                                                                                                                                             |

|                                      |  |                                                                                                                                             |
|--------------------------------------|--|---------------------------------------------------------------------------------------------------------------------------------------------|
| Razor + unique peptides 0h_2         |  |                                                                                                                                             |
| Razor + unique peptides 0h_3         |  |                                                                                                                                             |
| Razor + unique peptides BSA_1        |  |                                                                                                                                             |
| Razor + unique peptides BSA_2        |  |                                                                                                                                             |
| Razor + unique peptides BSA_3        |  |                                                                                                                                             |
| Razor + unique peptides FN_1         |  |                                                                                                                                             |
| Razor + unique peptides FN_2         |  |                                                                                                                                             |
| Razor + unique peptides FN_3         |  |                                                                                                                                             |
| Razor + unique peptides GFR_1        |  |                                                                                                                                             |
| Razor + unique peptides GFR_2        |  |                                                                                                                                             |
| Razor + unique peptides GFR_3        |  |                                                                                                                                             |
| Razor + unique peptides LAM_1        |  |                                                                                                                                             |
| Razor + unique peptides LAM_2        |  |                                                                                                                                             |
| Razor + unique peptides LAM_3        |  |                                                                                                                                             |
| Razor + unique peptides Matr 12h_1   |  |                                                                                                                                             |
| Razor + unique peptides Matr 12h_2   |  |                                                                                                                                             |
| Razor + unique peptides Matr 12h_3   |  |                                                                                                                                             |
| Razor + unique peptides Matr 24h_1   |  |                                                                                                                                             |
| Razor + unique peptides Matr 24h_2   |  |                                                                                                                                             |
| Razor + unique peptides Matr 24h_3   |  |                                                                                                                                             |
| Razor + unique peptides Matr 30h_1   |  |                                                                                                                                             |
| Razor + unique peptides Matr 30h_2   |  |                                                                                                                                             |
| Razor + unique peptides Matr 30h_3   |  |                                                                                                                                             |
| Razor + unique peptides Matr dil_1   |  |                                                                                                                                             |
| Razor + unique peptides Matr dil_2   |  |                                                                                                                                             |
| Razor + unique peptides Matr dil_3   |  |                                                                                                                                             |
| Unique peptides 0h_1                 |  |                                                                                                                                             |
| Unique peptides 0h_2                 |  |                                                                                                                                             |
| Unique peptides 0h_3                 |  |                                                                                                                                             |
| Unique peptides BSA_1                |  |                                                                                                                                             |
| Unique peptides BSA_2                |  |                                                                                                                                             |
| Unique peptides BSA_3                |  |                                                                                                                                             |
| Unique peptides FN_1                 |  |                                                                                                                                             |
| Unique peptides FN_2                 |  |                                                                                                                                             |
| Unique peptides FN_3                 |  |                                                                                                                                             |
| Unique peptides GFR_1                |  |                                                                                                                                             |
| Unique peptides GFR_2                |  |                                                                                                                                             |
| Unique peptides GFR_3                |  |                                                                                                                                             |
| Unique peptides LAM_1                |  |                                                                                                                                             |
| Unique peptides LAM_2                |  |                                                                                                                                             |
| Unique peptides LAM_3                |  |                                                                                                                                             |
| Unique peptides Matr 12h_1           |  |                                                                                                                                             |
| Unique peptides Matr 12h_2           |  |                                                                                                                                             |
| Unique peptides Matr 12h_3           |  |                                                                                                                                             |
| Unique peptides Matr 24h_1           |  |                                                                                                                                             |
| Unique peptides Matr 24h_2           |  |                                                                                                                                             |
| Unique peptides Matr 24h_3           |  |                                                                                                                                             |
| Unique peptides Matr 30h_1           |  |                                                                                                                                             |
| Unique peptides Matr 30h_2           |  |                                                                                                                                             |
| Unique peptides Matr 30h_3           |  |                                                                                                                                             |
| Unique peptides Matr dil_1           |  |                                                                                                                                             |
| Unique peptides Matr dil_2           |  |                                                                                                                                             |
| Unique peptides Matr dil_3           |  |                                                                                                                                             |
| Sequence coverage [%]                |  | Percentage of the sequence that is covered by the identified peptides of the best protein sequence contained in the group.                  |
| Unique + razor sequence coverage [%] |  | Percentage of the sequence that is covered by the identified unique and razor peptides of the best protein sequence contained in the group. |

|                              |  |                                                                                                                                   |
|------------------------------|--|-----------------------------------------------------------------------------------------------------------------------------------|
| Unique sequence coverage [%] |  | Percentage of the sequence that is covered by the identified unique peptides of the best protein sequence contained in the group. |
| Mol. weight [kDa]            |  | Molecular weight of the leading protein sequence contained in the protein group.                                                  |
| Sequence length              |  | The length of the leading protein sequence contained in the group.                                                                |
| Sequence lengths             |  | The length of all sequences of the proteins contained in the group.                                                               |
| Slice average                |  |                                                                                                                                   |
| Slice 1                      |  |                                                                                                                                   |
| Slice 2                      |  |                                                                                                                                   |
| Slice 3                      |  |                                                                                                                                   |
| Slice 4                      |  |                                                                                                                                   |
| Slice 5                      |  |                                                                                                                                   |
| Slice 6                      |  |                                                                                                                                   |
| Slice 7                      |  |                                                                                                                                   |
| Slice 8                      |  |                                                                                                                                   |
| Slice 9                      |  |                                                                                                                                   |
| Slice 10                     |  |                                                                                                                                   |
| Slice 11                     |  |                                                                                                                                   |
| Slice 12                     |  |                                                                                                                                   |
| Slice 13                     |  |                                                                                                                                   |
| Slice 14                     |  |                                                                                                                                   |
| Slice 15                     |  |                                                                                                                                   |
| Slice 16                     |  |                                                                                                                                   |
| Slice 17                     |  |                                                                                                                                   |
| Slice 18                     |  |                                                                                                                                   |
| Slice 31                     |  |                                                                                                                                   |
| Slice 32                     |  |                                                                                                                                   |
| Slice 33                     |  |                                                                                                                                   |
| Slice 34                     |  |                                                                                                                                   |
| Slice 35                     |  |                                                                                                                                   |
| Slice 36                     |  |                                                                                                                                   |
| Slice 37                     |  |                                                                                                                                   |
| Slice 38                     |  |                                                                                                                                   |
| Slice 39                     |  |                                                                                                                                   |
| Slice 40                     |  |                                                                                                                                   |
| Slice 41                     |  |                                                                                                                                   |
| Slice 42                     |  |                                                                                                                                   |
| Slice 43                     |  |                                                                                                                                   |
| Slice 44                     |  |                                                                                                                                   |
| Slice 45                     |  |                                                                                                                                   |
| Slice 46                     |  |                                                                                                                                   |
| Slice 47                     |  |                                                                                                                                   |
| Slice 48                     |  |                                                                                                                                   |
| Slice 61                     |  |                                                                                                                                   |
| Slice 62                     |  |                                                                                                                                   |
| Slice 63                     |  |                                                                                                                                   |
| Slice 64                     |  |                                                                                                                                   |
| Slice 65                     |  |                                                                                                                                   |
| Slice 66                     |  |                                                                                                                                   |
| Slice 67                     |  |                                                                                                                                   |
| Slice 68                     |  |                                                                                                                                   |
| Slice 69                     |  |                                                                                                                                   |
| Slice 70                     |  |                                                                                                                                   |
| Slice 71                     |  |                                                                                                                                   |
| Slice 72                     |  |                                                                                                                                   |
| Slice 73                     |  |                                                                                                                                   |
| Slice 74                     |  |                                                                                                                                   |
| Slice 75                     |  |                                                                                                                                   |
| Slice 76                     |  |                                                                                                                                   |
| Slice 77                     |  |                                                                                                                                   |
| Slice 78                     |  |                                                                                                                                   |
| Experiment 0h_1              |  |                                                                                                                                   |

|                                 |  |                                                                                                                                                                  |
|---------------------------------|--|------------------------------------------------------------------------------------------------------------------------------------------------------------------|
| Experiment 0h_2                 |  |                                                                                                                                                                  |
| Experiment 0h_3                 |  |                                                                                                                                                                  |
| Experiment BSA_1                |  |                                                                                                                                                                  |
| Experiment BSA_2                |  |                                                                                                                                                                  |
| Experiment BSA_3                |  |                                                                                                                                                                  |
| Experiment FN_1                 |  |                                                                                                                                                                  |
| Experiment FN_2                 |  |                                                                                                                                                                  |
| Experiment FN_3                 |  |                                                                                                                                                                  |
| Experiment GFR_1                |  |                                                                                                                                                                  |
| Experiment GFR_2                |  |                                                                                                                                                                  |
| Experiment GFR_3                |  |                                                                                                                                                                  |
| Experiment LAM_1                |  |                                                                                                                                                                  |
| Experiment LAM_2                |  |                                                                                                                                                                  |
| Experiment LAM_3                |  |                                                                                                                                                                  |
| Experiment Matr 12h_1           |  |                                                                                                                                                                  |
| Experiment Matr 12h_2           |  |                                                                                                                                                                  |
| Experiment Matr 12h_3           |  |                                                                                                                                                                  |
| Experiment Matr 24h_1           |  |                                                                                                                                                                  |
| Experiment Matr 24h_2           |  |                                                                                                                                                                  |
| Experiment Matr 24h_3           |  |                                                                                                                                                                  |
| Experiment Matr 30h_1           |  |                                                                                                                                                                  |
| Experiment Matr 30h_2           |  |                                                                                                                                                                  |
| Experiment Matr 30h_3           |  |                                                                                                                                                                  |
| Experiment Matr dil_1           |  |                                                                                                                                                                  |
| Experiment Matr dil_2           |  |                                                                                                                                                                  |
| Experiment Matr dil_3           |  |                                                                                                                                                                  |
| PEP                             |  | Posterior Error Probability of the identification. This value essentially operates as a p-value, where smaller is more significant.                              |
| Ratio H/L                       |  | The ratio between two heavy and light label partners.                                                                                                            |
| Ratio H/L normalized            |  | Normalized ratio between two medium and light label partners. The median of the total ratio population was shifted to 1.                                         |
| Ratio H/L variability [%]       |  | Coefficient of variability over all redundant quantifiable peptides. It is calculated as the standard deviation of the naturally logarithmized ratios times 100. |
| Ratio H/L count                 |  | Number of redundant peptides used for quantitation.                                                                                                              |
| Ratio H/L 0h_1                  |  | The ratio between two heavy and light label partners.                                                                                                            |
| Ratio H/L normalized 0h_1       |  | Normalized ratio between two medium and light label partners. The median of the total ratio population was shifted to 1.                                         |
| Ratio H/L variability [%] 0h_1  |  | Coefficient of variability over all redundant quantifiable peptides. It is calculated as the standard deviation of the naturally logarithmized ratios times 100. |
| Ratio H/L count 0h_1            |  | Number of redundant peptides used for quantitation.                                                                                                              |
| Ratio H/L 0h_2                  |  | The ratio between two heavy and light label partners.                                                                                                            |
| Ratio H/L normalized 0h_2       |  | Normalized ratio between two medium and light label partners. The median of the total ratio population was shifted to 1.                                         |
| Ratio H/L variability [%] 0h_2  |  | Coefficient of variability over all redundant quantifiable peptides. It is calculated as the standard deviation of the naturally logarithmized ratios times 100. |
| Ratio H/L count 0h_2            |  | Number of redundant peptides used for quantitation.                                                                                                              |
| Ratio H/L 0h_3                  |  | The ratio between two heavy and light label partners.                                                                                                            |
| Ratio H/L normalized 0h_3       |  | Normalized ratio between two medium and light label partners. The median of the total ratio population was shifted to 1.                                         |
| Ratio H/L variability [%] 0h_3  |  | Coefficient of variability over all redundant quantifiable peptides. It is calculated as the standard deviation of the naturally logarithmized ratios times 100. |
| Ratio H/L count 0h_3            |  | Number of redundant peptides used for quantitation.                                                                                                              |
| Ratio H/L BSA_1                 |  | The ratio between two heavy and light label partners.                                                                                                            |
| Ratio H/L normalized BSA_1      |  | Normalized ratio between two medium and light label partners. The median of the total ratio population was shifted to 1.                                         |
| Ratio H/L variability [%] BSA_1 |  | Coefficient of variability over all redundant quantifiable peptides. It is calculated as the standard deviation of the naturally logarithmized ratios times 100. |
| Ratio H/L count BSA_1           |  | Number of redundant peptides used for quantitation.                                                                                                              |
| Ratio H/L BSA_2                 |  | The ratio between two heavy and light label partners.                                                                                                            |
| Ratio H/L normalized BSA_2      |  | Normalized ratio between two medium and light label partners. The median of the total ratio population was shifted to 1.                                         |
| Ratio H/L variability [%] BSA_2 |  | Coefficient of variability over all redundant quantifiable peptides. It is calculated as the standard deviation of the naturally logarithmized ratios times 100. |

|                                 |  |                                                                                                                                                                  |
|---------------------------------|--|------------------------------------------------------------------------------------------------------------------------------------------------------------------|
| Ratio H/L count BSA_2           |  | Number of redundant peptides used for quantitation.                                                                                                              |
| Ratio H/L BSA_3                 |  | The ratio between two heavy and light label partners.                                                                                                            |
| Ratio H/L normalized BSA_3      |  | Normalized ratio between two medium and light label partners. The median of the total ratio population was shifted to 1.                                         |
| Ratio H/L variability [%] BSA_3 |  | Coefficient of variability over all redundant quantifiable peptides. It is calculated as the standard deviation of the naturally logarithmized ratios times 100. |
| Ratio H/L count BSA_3           |  | Number of redundant peptides used for quantitation.                                                                                                              |
| Ratio H/L FN_1                  |  | The ratio between two heavy and light label partners.                                                                                                            |
| Ratio H/L normalized FN_1       |  | Normalized ratio between two medium and light label partners. The median of the total ratio population was shifted to 1.                                         |
| Ratio H/L variability [%] FN_1  |  | Coefficient of variability over all redundant quantifiable peptides. It is calculated as the standard deviation of the naturally logarithmized ratios times 100. |
| Ratio H/L count FN_1            |  | Number of redundant peptides used for quantitation.                                                                                                              |
| Ratio H/L FN_2                  |  | The ratio between two heavy and light label partners.                                                                                                            |
| Ratio H/L normalized FN_2       |  | Normalized ratio between two medium and light label partners. The median of the total ratio population was shifted to 1.                                         |
| Ratio H/L variability [%] FN_2  |  | Coefficient of variability over all redundant quantifiable peptides. It is calculated as the standard deviation of the naturally logarithmized ratios times 100. |
| Ratio H/L count FN_2            |  | Number of redundant peptides used for quantitation.                                                                                                              |
| Ratio H/L FN_3                  |  | The ratio between two heavy and light label partners.                                                                                                            |
| Ratio H/L normalized FN_3       |  | Normalized ratio between two medium and light label partners. The median of the total ratio population was shifted to 1.                                         |
| Ratio H/L variability [%] FN_3  |  | Coefficient of variability over all redundant quantifiable peptides. It is calculated as the standard deviation of the naturally logarithmized ratios times 100. |
| Ratio H/L count FN_3            |  | Number of redundant peptides used for quantitation.                                                                                                              |
| Ratio H/L GFR_1                 |  | The ratio between two heavy and light label partners.                                                                                                            |
| Ratio H/L normalized GFR_1      |  | Normalized ratio between two medium and light label partners. The median of the total ratio population was shifted to 1.                                         |
| Ratio H/L variability [%] GFR_1 |  | Coefficient of variability over all redundant quantifiable peptides. It is calculated as the standard deviation of the naturally logarithmized ratios times 100. |
| Ratio H/L count GFR_1           |  | Number of redundant peptides used for quantitation.                                                                                                              |
| Ratio H/L GFR_2                 |  | The ratio between two heavy and light label partners.                                                                                                            |
| Ratio H/L normalized GFR_2      |  | Normalized ratio between two medium and light label partners. The median of the total ratio population was shifted to 1.                                         |
| Ratio H/L variability [%] GFR_2 |  | Coefficient of variability over all redundant quantifiable peptides. It is calculated as the standard deviation of the naturally logarithmized ratios times 100. |
| Ratio H/L count GFR_2           |  | Number of redundant peptides used for quantitation.                                                                                                              |
| Ratio H/L GFR_3                 |  | The ratio between two heavy and light label partners.                                                                                                            |
| Ratio H/L normalized GFR_3      |  | Normalized ratio between two medium and light label partners. The median of the total ratio population was shifted to 1.                                         |
| Ratio H/L variability [%] GFR_3 |  | Coefficient of variability over all redundant quantifiable peptides. It is calculated as the standard deviation of the naturally logarithmized ratios times 100. |
| Ratio H/L count GFR_3           |  | Number of redundant peptides used for quantitation.                                                                                                              |
| Ratio H/L LAM_1                 |  | The ratio between two heavy and light label partners.                                                                                                            |
| Ratio H/L normalized LAM_1      |  | Normalized ratio between two medium and light label partners. The median of the total ratio population was shifted to 1.                                         |
| Ratio H/L variability [%] LAM_1 |  | Coefficient of variability over all redundant quantifiable peptides. It is calculated as the standard deviation of the naturally logarithmized ratios times 100. |
| Ratio H/L count LAM_1           |  | Number of redundant peptides used for quantitation.                                                                                                              |
| Ratio H/L LAM_2                 |  | The ratio between two heavy and light label partners.                                                                                                            |
| Ratio H/L normalized LAM_2      |  | Normalized ratio between two medium and light label partners. The median of the total ratio population was shifted to 1.                                         |
| Ratio H/L variability [%] LAM_2 |  | Coefficient of variability over all redundant quantifiable peptides. It is calculated as the standard deviation of the naturally logarithmized ratios times 100. |
| Ratio H/L count LAM_2           |  | Number of redundant peptides used for quantitation.                                                                                                              |
| Ratio H/L LAM_3                 |  | The ratio between two heavy and light label partners.                                                                                                            |
| Ratio H/L normalized LAM_3      |  | Normalized ratio between two medium and light label partners. The median of the total ratio population was shifted to 1.                                         |
| Ratio H/L variability [%] LAM_3 |  | Coefficient of variability over all redundant quantifiable peptides. It is calculated as the standard deviation of the naturally logarithmized ratios times 100. |
| Ratio H/L count LAM_3           |  | Number of redundant peptides used for quantitation.                                                                                                              |
| Ratio H/L Matr 12h_1            |  | The ratio between two heavy and light label partners.                                                                                                            |
| Ratio H/L normalized Matr 12h_1 |  | Normalized ratio between two medium and light label partners. The median of the total ratio population was shifted to 1.                                         |



|                                      |  |                                                                                                                                                                  |
|--------------------------------------|--|------------------------------------------------------------------------------------------------------------------------------------------------------------------|
| Ratio H/L Matr dil_3                 |  | The ratio between two heavy and light label partners.                                                                                                            |
| Ratio H/L normalized Matr dil_3      |  | Normalized ratio between two medium and light label partners. The median of the total ratio population was shifted to 1.                                         |
| Ratio H/L variability [%] Matr dil_3 |  | Coefficient of variability over all redundant quantifiable peptides. It is calculated as the standard deviation of the naturally logarithmized ratios times 100. |
| Ratio H/L count Matr dil_3           |  | Number of redundant peptides used for quantitation.                                                                                                              |
| Sequence coverage 0h_1 [%]           |  | Percentage of the sequence that is covered by the identified peptides in this sample of the longest protein sequence contained within the group.                 |
| Sequence coverage 0h_2 [%]           |  | Percentage of the sequence that is covered by the identified peptides in this sample of the longest protein sequence contained within the group.                 |
| Sequence coverage 0h_3 [%]           |  | Percentage of the sequence that is covered by the identified peptides in this sample of the longest protein sequence contained within the group.                 |
| Sequence coverage BSA_1 [%]          |  | Percentage of the sequence that is covered by the identified peptides in this sample of the longest protein sequence contained within the group.                 |
| Sequence coverage BSA_2 [%]          |  | Percentage of the sequence that is covered by the identified peptides in this sample of the longest protein sequence contained within the group.                 |
| Sequence coverage BSA_3 [%]          |  | Percentage of the sequence that is covered by the identified peptides in this sample of the longest protein sequence contained within the group.                 |
| Sequence coverage FN_1 [%]           |  | Percentage of the sequence that is covered by the identified peptides in this sample of the longest protein sequence contained within the group.                 |
| Sequence coverage FN_2 [%]           |  | Percentage of the sequence that is covered by the identified peptides in this sample of the longest protein sequence contained within the group.                 |
| Sequence coverage FN_3 [%]           |  | Percentage of the sequence that is covered by the identified peptides in this sample of the longest protein sequence contained within the group.                 |
| Sequence coverage GFR_1 [%]          |  | Percentage of the sequence that is covered by the identified peptides in this sample of the longest protein sequence contained within the group.                 |
| Sequence coverage GFR_2 [%]          |  | Percentage of the sequence that is covered by the identified peptides in this sample of the longest protein sequence contained within the group.                 |
| Sequence coverage GFR_3 [%]          |  | Percentage of the sequence that is covered by the identified peptides in this sample of the longest protein sequence contained within the group.                 |
| Sequence coverage LAM_1 [%]          |  | Percentage of the sequence that is covered by the identified peptides in this sample of the longest protein sequence contained within the group.                 |
| Sequence coverage LAM_2 [%]          |  | Percentage of the sequence that is covered by the identified peptides in this sample of the longest protein sequence contained within the group.                 |
| Sequence coverage LAM_3 [%]          |  | Percentage of the sequence that is covered by the identified peptides in this sample of the longest protein sequence contained within the group.                 |
| Sequence coverage Matr 12h_1 [%]     |  | Percentage of the sequence that is covered by the identified peptides in this sample of the longest protein sequence contained within the group.                 |
| Sequence coverage Matr 12h_2 [%]     |  | Percentage of the sequence that is covered by the identified peptides in this sample of the longest protein sequence contained within the group.                 |
| Sequence coverage Matr 12h_3 [%]     |  | Percentage of the sequence that is covered by the identified peptides in this sample of the longest protein sequence contained within the group.                 |
| Sequence coverage Matr 24h_1 [%]     |  | Percentage of the sequence that is covered by the identified peptides in this sample of the longest protein sequence contained within the group.                 |
| Sequence coverage Matr 24h_2 [%]     |  | Percentage of the sequence that is covered by the identified peptides in this sample of the longest protein sequence contained within the group.                 |
| Sequence coverage Matr 24h_3 [%]     |  | Percentage of the sequence that is covered by the identified peptides in this sample of the longest protein sequence contained within the group.                 |
| Sequence coverage Matr 30h_1 [%]     |  | Percentage of the sequence that is covered by the identified peptides in this sample of the longest protein sequence contained within the group.                 |
| Sequence coverage Matr 30h_2 [%]     |  | Percentage of the sequence that is covered by the identified peptides in this sample of the longest protein sequence contained within the group.                 |
| Sequence coverage Matr 30h_3 [%]     |  | Percentage of the sequence that is covered by the identified peptides in this sample of the longest protein sequence contained within the group.                 |

|                                  |  |                                                                                                                                                                                                                           |
|----------------------------------|--|---------------------------------------------------------------------------------------------------------------------------------------------------------------------------------------------------------------------------|
| Sequence coverage Matr dil_1 [%] |  | Percentage of the sequence that is covered by the identified peptides in this sample of the longest protein sequence contained within the group.                                                                          |
| Sequence coverage Matr dil_2 [%] |  | Percentage of the sequence that is covered by the identified peptides in this sample of the longest protein sequence contained within the group.                                                                          |
| Sequence coverage Matr dil_3 [%] |  | Percentage of the sequence that is covered by the identified peptides in this sample of the longest protein sequence contained within the group.                                                                          |
| Intensity                        |  | Summed up eXtracted Ion Current (XIC) of all isotopic clusters associated with the identified AA sequence. In case of a labeled experiment this is the total intensity of all the isotopic patterns in the label cluster. |
| Intensity L                      |  | Summed up eXtracted Ion Current (XIC) of the isotopic cluster linked to the light label partner.                                                                                                                          |
| Intensity H                      |  | Summed up eXtracted Ion Current (XIC) of the isotopic cluster linked to the heavy label partner.                                                                                                                          |
| Intensity 0h_1                   |  | Summed up eXtracted Ion Current (XIC) of all isotopic clusters associated with the identified AA sequence. In case of a labeled experiment this is the total intensity of all the isotopic patterns in the label cluster. |
| Intensity L 0h_1                 |  | Summed up eXtracted Ion Current (XIC) of the isotopic cluster linked to the light label partner.                                                                                                                          |
| Intensity H 0h_1                 |  | Summed up eXtracted Ion Current (XIC) of the isotopic cluster linked to the heavy label partner.                                                                                                                          |
| Intensity 0h_2                   |  | Summed up eXtracted Ion Current (XIC) of all isotopic clusters associated with the identified AA sequence. In case of a labeled experiment this is the total intensity of all the isotopic patterns in the label cluster. |
| Intensity L 0h_2                 |  | Summed up eXtracted Ion Current (XIC) of the isotopic cluster linked to the light label partner.                                                                                                                          |
| Intensity H 0h_2                 |  | Summed up eXtracted Ion Current (XIC) of the isotopic cluster linked to the heavy label partner.                                                                                                                          |
| Intensity 0h_3                   |  | Summed up eXtracted Ion Current (XIC) of all isotopic clusters associated with the identified AA sequence. In case of a labeled experiment this is the total intensity of all the isotopic patterns in the label cluster. |
| Intensity L 0h_3                 |  | Summed up eXtracted Ion Current (XIC) of the isotopic cluster linked to the light label partner.                                                                                                                          |
| Intensity H 0h_3                 |  | Summed up eXtracted Ion Current (XIC) of the isotopic cluster linked to the heavy label partner.                                                                                                                          |
| Intensity BSA_1                  |  | Summed up eXtracted Ion Current (XIC) of all isotopic clusters associated with the identified AA sequence. In case of a labeled experiment this is the total intensity of all the isotopic patterns in the label cluster. |
| Intensity L BSA_1                |  | Summed up eXtracted Ion Current (XIC) of the isotopic cluster linked to the light label partner.                                                                                                                          |
| Intensity H BSA_1                |  | Summed up eXtracted Ion Current (XIC) of the isotopic cluster linked to the heavy label partner.                                                                                                                          |
| Intensity BSA_2                  |  | Summed up eXtracted Ion Current (XIC) of all isotopic clusters associated with the identified AA sequence. In case of a labeled experiment this is the total intensity of all the isotopic patterns in the label cluster. |
| Intensity L BSA_2                |  | Summed up eXtracted Ion Current (XIC) of the isotopic cluster linked to the light label partner.                                                                                                                          |
| Intensity H BSA_2                |  | Summed up eXtracted Ion Current (XIC) of the isotopic cluster linked to the heavy label partner.                                                                                                                          |
| Intensity BSA_3                  |  | Summed up eXtracted Ion Current (XIC) of all isotopic clusters associated with the identified AA sequence. In case of a labeled experiment this is the total intensity of all the isotopic patterns in the label cluster. |
| Intensity L BSA_3                |  | Summed up eXtracted Ion Current (XIC) of the isotopic cluster linked to the light label partner.                                                                                                                          |
| Intensity H BSA_3                |  | Summed up eXtracted Ion Current (XIC) of the isotopic cluster linked to the heavy label partner.                                                                                                                          |
| Intensity FN_1                   |  | Summed up eXtracted Ion Current (XIC) of all isotopic clusters associated with the identified AA sequence. In case of a labeled experiment this is the total intensity of all the isotopic patterns in the label cluster. |
| Intensity L FN_1                 |  | Summed up eXtracted Ion Current (XIC) of the isotopic cluster linked to the light label partner.                                                                                                                          |
| Intensity H FN_1                 |  | Summed up eXtracted Ion Current (XIC) of the isotopic cluster linked to the heavy label partner.                                                                                                                          |
| Intensity FN_2                   |  | Summed up eXtracted Ion Current (XIC) of all isotopic clusters associated with the identified AA sequence. In case of a labeled experiment this is the total intensity of all the isotopic patterns in the label cluster. |
| Intensity L FN_2                 |  | Summed up eXtracted Ion Current (XIC) of the isotopic cluster linked to the light label partner.                                                                                                                          |
| Intensity H FN_2                 |  | Summed up eXtracted Ion Current (XIC) of the isotopic cluster linked to the heavy label partner.                                                                                                                          |





|                         |  |                                                                                                                                                                                                                                                                                                                                                                              |
|-------------------------|--|------------------------------------------------------------------------------------------------------------------------------------------------------------------------------------------------------------------------------------------------------------------------------------------------------------------------------------------------------------------------------|
| Intensity Matr 24h_1    |  | Summed up eXtracted Ion Current (XIC) of all isotopic clusters associated with the identified AA sequence. In case of a labeled experiment this is the total intensity of all the isotopic patterns in the label cluster.                                                                                                                                                    |
| Intensity L Matr 24h_1  |  | Summed up eXtracted Ion Current (XIC) of the isotopic cluster linked to the light label partner.                                                                                                                                                                                                                                                                             |
| Intensity H Matr 24h_1  |  | Summed up eXtracted Ion Current (XIC) of the isotopic cluster linked to the heavy label partner.                                                                                                                                                                                                                                                                             |
| Intensity Matr 24h_2    |  | Summed up eXtracted Ion Current (XIC) of all isotopic clusters associated with the identified AA sequence. In case of a labeled experiment this is the total intensity of all the isotopic patterns in the label cluster.                                                                                                                                                    |
| Intensity L Matr 24h_2  |  | Summed up eXtracted Ion Current (XIC) of the isotopic cluster linked to the light label partner.                                                                                                                                                                                                                                                                             |
| Intensity H Matr 24h_2  |  | Summed up eXtracted Ion Current (XIC) of the isotopic cluster linked to the heavy label partner.                                                                                                                                                                                                                                                                             |
| Intensity Matr 24h_3    |  | Summed up eXtracted Ion Current (XIC) of all isotopic clusters associated with the identified AA sequence. In case of a labeled experiment this is the total intensity of all the isotopic patterns in the label cluster.                                                                                                                                                    |
| Intensity L Matr 24h_3  |  | Summed up eXtracted Ion Current (XIC) of the isotopic cluster linked to the light label partner.                                                                                                                                                                                                                                                                             |
| Intensity H Matr 24h_3  |  | Summed up eXtracted Ion Current (XIC) of the isotopic cluster linked to the heavy label partner.                                                                                                                                                                                                                                                                             |
| Intensity Matr 30h_1    |  | Summed up eXtracted Ion Current (XIC) of all isotopic clusters associated with the identified AA sequence. In case of a labeled experiment this is the total intensity of all the isotopic patterns in the label cluster.                                                                                                                                                    |
| Intensity L Matr 30h_1  |  | Summed up eXtracted Ion Current (XIC) of the isotopic cluster linked to the light label partner.                                                                                                                                                                                                                                                                             |
| Intensity H Matr 30h_1  |  | Summed up eXtracted Ion Current (XIC) of the isotopic cluster linked to the heavy label partner.                                                                                                                                                                                                                                                                             |
| Intensity Matr 30h_2    |  | Summed up eXtracted Ion Current (XIC) of all isotopic clusters associated with the identified AA sequence. In case of a labeled experiment this is the total intensity of all the isotopic patterns in the label cluster.                                                                                                                                                    |
| Intensity L Matr 30h_2  |  | Summed up eXtracted Ion Current (XIC) of the isotopic cluster linked to the light label partner.                                                                                                                                                                                                                                                                             |
| Intensity H Matr 30h_2  |  | Summed up eXtracted Ion Current (XIC) of the isotopic cluster linked to the heavy label partner.                                                                                                                                                                                                                                                                             |
| Intensity Matr 30h_3    |  | Summed up eXtracted Ion Current (XIC) of all isotopic clusters associated with the identified AA sequence. In case of a labeled experiment this is the total intensity of all the isotopic patterns in the label cluster.                                                                                                                                                    |
| Intensity L Matr 30h_3  |  | Summed up eXtracted Ion Current (XIC) of the isotopic cluster linked to the light label partner.                                                                                                                                                                                                                                                                             |
| Intensity H Matr 30h_3  |  | Summed up eXtracted Ion Current (XIC) of the isotopic cluster linked to the heavy label partner.                                                                                                                                                                                                                                                                             |
| Intensity Matr dil_1    |  | Summed up eXtracted Ion Current (XIC) of all isotopic clusters associated with the identified AA sequence. In case of a labeled experiment this is the total intensity of all the isotopic patterns in the label cluster.                                                                                                                                                    |
| Intensity L Matr dil_1  |  | Summed up eXtracted Ion Current (XIC) of the isotopic cluster linked to the light label partner.                                                                                                                                                                                                                                                                             |
| Intensity H Matr dil_1  |  | Summed up eXtracted Ion Current (XIC) of the isotopic cluster linked to the heavy label partner.                                                                                                                                                                                                                                                                             |
| Intensity Matr dil_2    |  | Summed up eXtracted Ion Current (XIC) of all isotopic clusters associated with the identified AA sequence. In case of a labeled experiment this is the total intensity of all the isotopic patterns in the label cluster.                                                                                                                                                    |
| Intensity L Matr dil_2  |  | Summed up eXtracted Ion Current (XIC) of the isotopic cluster linked to the light label partner.                                                                                                                                                                                                                                                                             |
| Intensity H Matr dil_2  |  | Summed up eXtracted Ion Current (XIC) of the isotopic cluster linked to the heavy label partner.                                                                                                                                                                                                                                                                             |
| Intensity Matr dil_3    |  | Summed up eXtracted Ion Current (XIC) of all isotopic clusters associated with the identified AA sequence. In case of a labeled experiment this is the total intensity of all the isotopic patterns in the label cluster.                                                                                                                                                    |
| Intensity L Matr dil_3  |  | Summed up eXtracted Ion Current (XIC) of the isotopic cluster linked to the light label partner.                                                                                                                                                                                                                                                                             |
| Intensity H Matr dil_3  |  | Summed up eXtracted Ion Current (XIC) of the isotopic cluster linked to the heavy label partner.                                                                                                                                                                                                                                                                             |
| Only identified by site |  | When marked with '+', this particular protein group was identified only by a modification site.                                                                                                                                                                                                                                                                              |
| Reverse                 |  | When marked with '+', this particular protein group contains no protein, made up of at least 50% of the peptides of the leading protein, with a peptide derived from the reversed part of the decoy database. These should be removed for further data analysis. The 50% rule is in place to prevent spurious protein hits to erroneously flag the protein group as reverse. |

|                              |  |                                                                                                                                                                                     |
|------------------------------|--|-------------------------------------------------------------------------------------------------------------------------------------------------------------------------------------|
| Contaminant                  |  | When marked with '+', this particular protein group was found to be a commonly occurring contaminant. These should be removed for further data analysis.                            |
| id                           |  | A unique (consecutive) identifier for each row in the proteinGroups table, which is used to cross-link the information in this file with the information stored in the other files. |
| Peptide IDs                  |  | Identifier(s) of the associated peptide sequence(s) summary, which can be found in the file 'peptides.txt'.                                                                         |
| Peptide is razor             |  | Indicates for each peptide ID if it is a razor or group unique peptide (true) or a non unique non razor peptide (false).                                                            |
| Mod. peptide IDs             |  |                                                                                                                                                                                     |
| Evidence IDs                 |  |                                                                                                                                                                                     |
| MS/MS IDs                    |  |                                                                                                                                                                                     |
| Best MS/MS                   |  | The identifier of the best (in terms of quality) MS/MS scans identifying the peptides of this protein, referenced against the msms table.                                           |
| Oxidation (M) site IDs       |  | Identifier(s) for site(s) associated with the protein group, which show(s) evidence of the modification, referenced against the appropriate modification site file.                 |
| Oxidation (M) site positions |  | Positions of the sites in the leading protein of this group.                                                                                                                        |
