# Supplementary material
Source: PubMed Central journal article supplement (PMC3861710)
Supplement: supp_M113.031344_mcp.M113.031344-12.pdf [file supp_M113.031344_mcp.M113.031344-12.pdf]

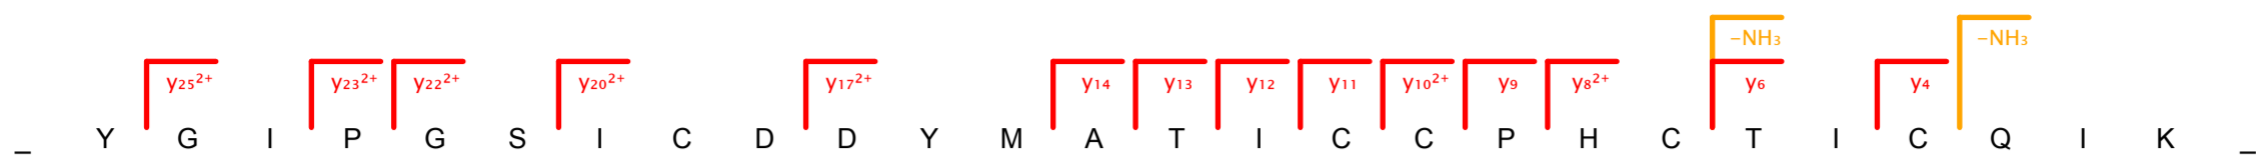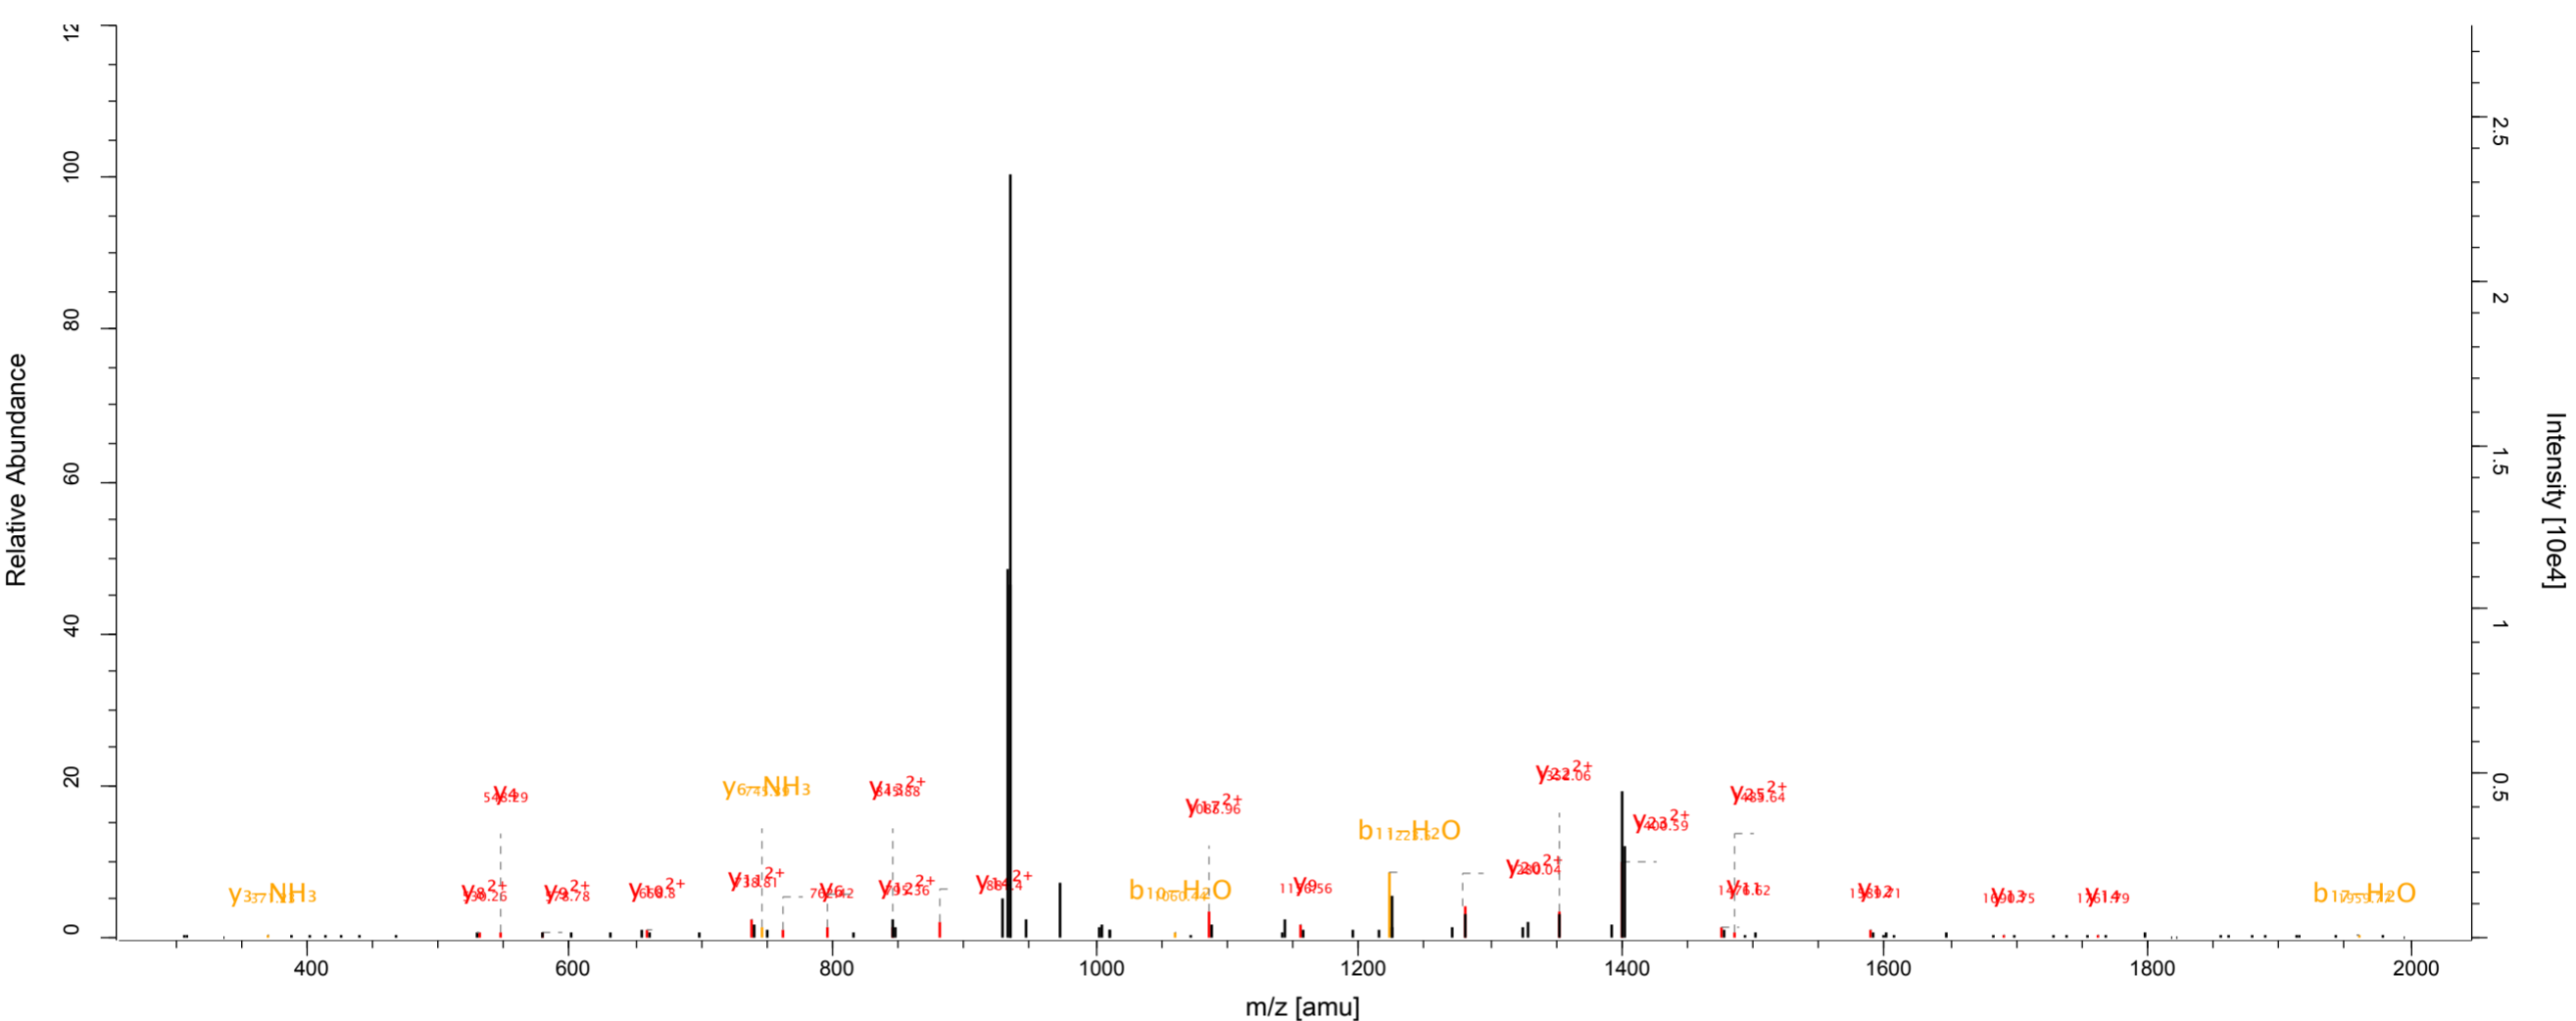

precursor information

|                   |                  |
|-------------------|------------------|
| Mass:             | 2122.2282        |
| m/z:              | 1045.11671       |
| Charge:           | 2+               |
| Retention time:   | 107.222304775201 |
| Score:            | 70.2026          |
| Mass Error (ppm): | 0.7227           |
| PEP:              | 0.00025125       |
| Precursor Type:   | ISO              |

| b ion    |                |    |     |    | y ion          |            | y <sup>2+</sup> ion |            |
|----------|----------------|----|-----|----|----------------|------------|---------------------|------------|
| Δ dalton | mass           |    | seq |    | Δ dalton       | mass       | Δ dalton            | mass       |
|          | 164.070605005  | 1  | Y   | 25 |                |            |                     |            |
|          | 221.092068728  | 2  | G   | 24 | 2970.274507959 |            | 1485.640892213      | -0.1191637 |
|          | 334.176132709  | 3  | I   | 23 | 2913.253044235 |            | 2913.253044235      |            |
|          | 431.228896561  | 4  | P   | 22 | 2800.168980255 |            | 1400.588128361      | -0.0153745 |
|          | 488.250360284  | 5  | G   | 21 | 2703.116216403 |            | 1352.061746435      | +0.4090788 |
|          | 575.282388694  | 6  | S   | 20 | 2646.094752679 |            | 2646.094752679      |            |
|          | 688.366452675  | 7  | I   | 19 | 2559.062724269 |            | 1280.035000368      | +0.2776217 |
|          | 848.397100876  | 8  | C   | 18 | 2445.978660289 |            | 2445.978660289      |            |
|          | 963.424043908  | 9  | D   | 17 | 2285.948012088 |            | 2285.948012088      |            |
|          | 1078.45098694  | 10 | D   | 16 | 2170.921069056 |            | 1085.964172761      | +0.1815792 |
|          | 1241.514315478 | 11 | Y   | 15 | 2055.894126024 |            | 2055.894126024      |            |
|          | 1372.554800085 | 12 | M   | 14 | 1892.830797485 |            | 1892.830797485      |            |
|          | 1443.591913872 | 13 | A   | 13 | 1761.790312879 | +0.2743844 | 881.398794673       | -0.1039949 |
|          | 1544.639592347 | 14 | T   | 12 | 1690.753199091 | +0.1092277 | 845.880237779       | -0.1208384 |
|          | 1657.723656327 | 15 | I   | 11 | 1589.705520617 | -0.025711  | 795.356398542       | -0.3135519 |
|          | 1817.754304528 | 16 | C   | 10 | 1476.621456637 | -0.0174527 | 738.814366552       | +0.4034069 |
|          | 1977.78495273  | 17 | C   | 9  | 1316.590808436 |            | 658.799042451       | +0.2460015 |
|          | 2074.837716582 | 18 | P   | 8  | 1156.560160234 | -0.0325723 | 578.78371835        | +0.0251195 |
|          | 2211.896628444 | 19 | H   | 7  | 1059.507396382 |            | 530.257336424       | +0.457019  |
|          | 2371.927276646 | 20 | C   | 6  | 922.44848452   |            | 922.44848452        |            |
|          | 2472.97495512  | 21 | T   | 5  | 762.417836318  | +0.1734723 | 762.417836318       |            |
|          | 2586.0590191   | 22 | I   | 4  | 661.370157844  |            | 661.370157844       |            |
|          | 2746.089667301 | 23 | C   | 3  | 548.286093864  | -0.0791847 | 548.286093864       |            |
|          | 2874.148244813 | 24 | Q   | 2  | 388.255445662  |            | 388.255445662       |            |
|          | 2987.232308793 | 25 | I   | 1  | 260.196868151  |            | 260.196868151       |            |
|          |                | 26 | K   | 0  | 147.112804171  |            | 147.112804171       |            |

general information

|                       |            |
|-----------------------|------------|
| Annotation:           | 17 of 26   |
| AminoAcids Coverage:  | 65 %       |
| Intensity Coverage:   | 14 %       |
| Peak Coverage:        | 24 %       |
| Protein Localisation: | 78 ... 103 |

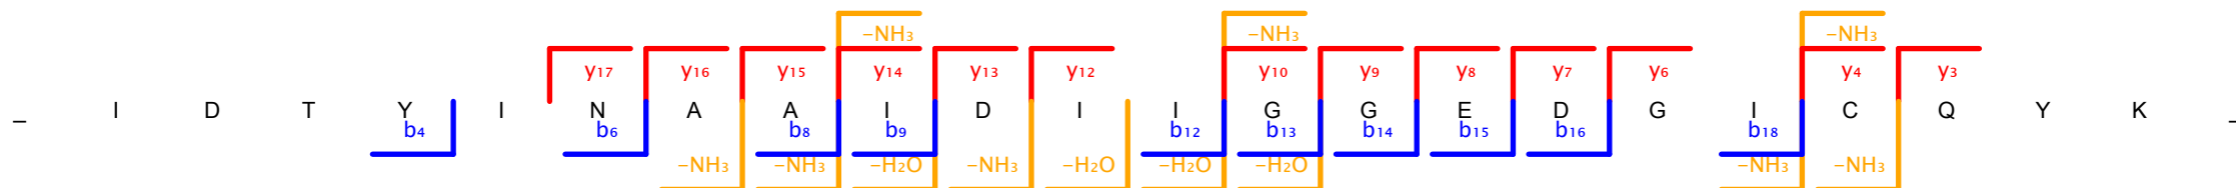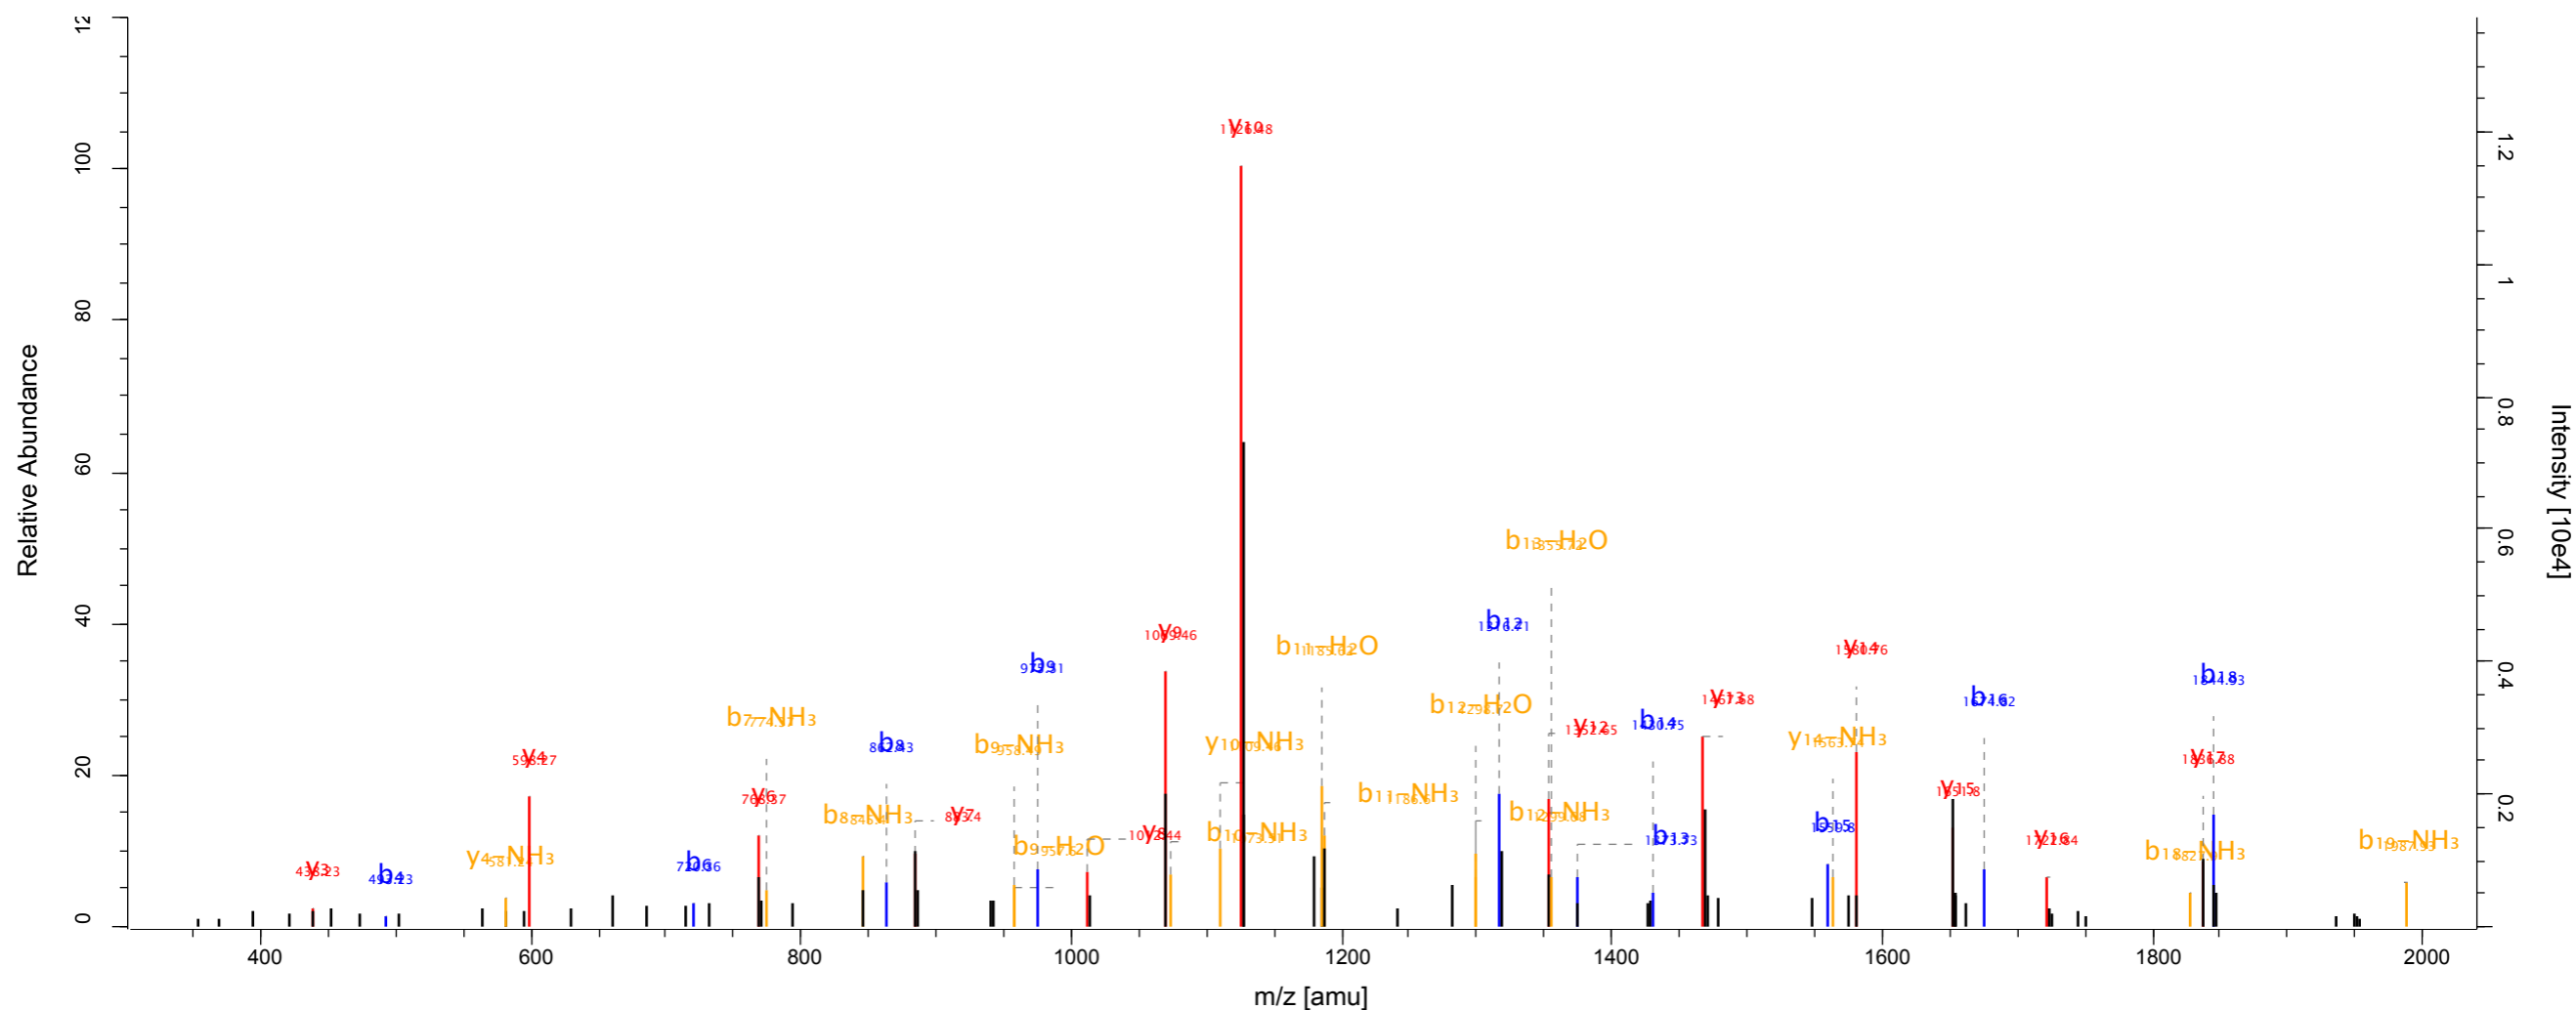

precursor information

|                   |                  |
|-------------------|------------------|
| Mass:             | 2441.17002       |
| m/z:              | 1221.50670       |
| Charge:           | 2+               |
| Retention time:   | 128.652670442350 |
| Score:            | 168.7882         |
| Mass Error (ppm): | 0.24165          |
| DEP:              | 1.5224E-18       |
| Precursor Type:   | ISO              |

| b ion      |                |    |     |    | y ion          |            |
|------------|----------------|----|-----|----|----------------|------------|
| Δ dalton   | mass           |    | seq |    | Δ dalton       | mass       |
|            | 114.091340447  | 1  | I   | 21 |                |            |
|            | 229.118283479  | 2  | D   | 20 | 2329.101653722 |            |
|            | 330.165961953  | 3  | T   | 19 | 2214.07471069  |            |
| +0.2042117 | 493.229290491  | 4  | Y   | 18 | 2113.027032216 |            |
|            | 606.313354472  | 5  | I   | 17 | 1949.963703678 |            |
| +0.147136  | 720.356281919  | 6  | N   | 16 | 1836.879639697 | +0.0186757 |
|            | 791.393395707  | 7  | A   | 15 | 1722.83671225  | -0.1273617 |
| -0.2156657 | 862.430509495  | 8  | A   | 14 | 1651.799598462 | -0.185951  |
| -0.0072493 | 975.514573475  | 9  | I   | 13 | 1580.762484674 | +0.1260651 |
|            | 1090.541516507 | 10 | D   | 12 | 1467.678420694 | -0.1096951 |
|            | 1203.625580487 | 11 | I   | 11 | 1352.651477662 | +0.037121  |
| -0.0946542 | 1316.709644468 | 12 | I   | 10 | 1239.567413682 |            |
| +0.0600295 | 1373.731108191 | 13 | G   | 9  | 1126.483349701 | -0.0696534 |
| -0.1214684 | 1430.752571915 | 14 | G   | 8  | 1069.461885978 | -0.0934778 |
| +0.0177012 | 1559.795165011 | 15 | E   | 7  | 1012.440422254 | +0.0224684 |
| -0.1728161 | 1674.822108043 | 16 | D   | 6  | 883.397829158  | +0.0596904 |
|            | 1731.843571767 | 17 | G   | 5  | 768.370886126  | +0.0170533 |
| -0.3180166 | 1844.927635747 | 18 | I   | 4  | 711.349422402  |            |
|            | 2004.958283949 | 19 | C   | 3  | 598.265358422  | +0.0643535 |
|            | 2133.01686146  | 20 | Q   | 2  | 438.23471022   | +0.155396  |
|            | 2296.080189998 | 21 | Y   | 1  | 310.176132709  |            |
|            |                | 22 | K   | 0  | 147.112804171  |            |

general information

|                       |           |
|-----------------------|-----------|
| Annotation:           | 17 of 22  |
| AminoAcids Coverage:  | 77%       |
| Intensity Coverage:   | 50%       |
| Peak Coverage:        | 20%       |
| Protein Localisation: | 45 ... 66 |

Scan number 19874 Raw file 20080621\_Orbi3\_SZ\_Matrigel\_Exp2\_24h\_InGel\_03  
 Method ITMS; CID Genenames S100A2

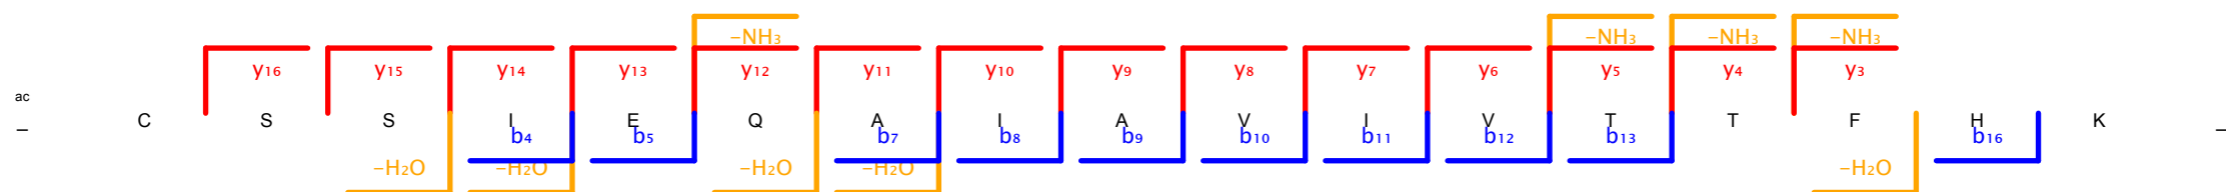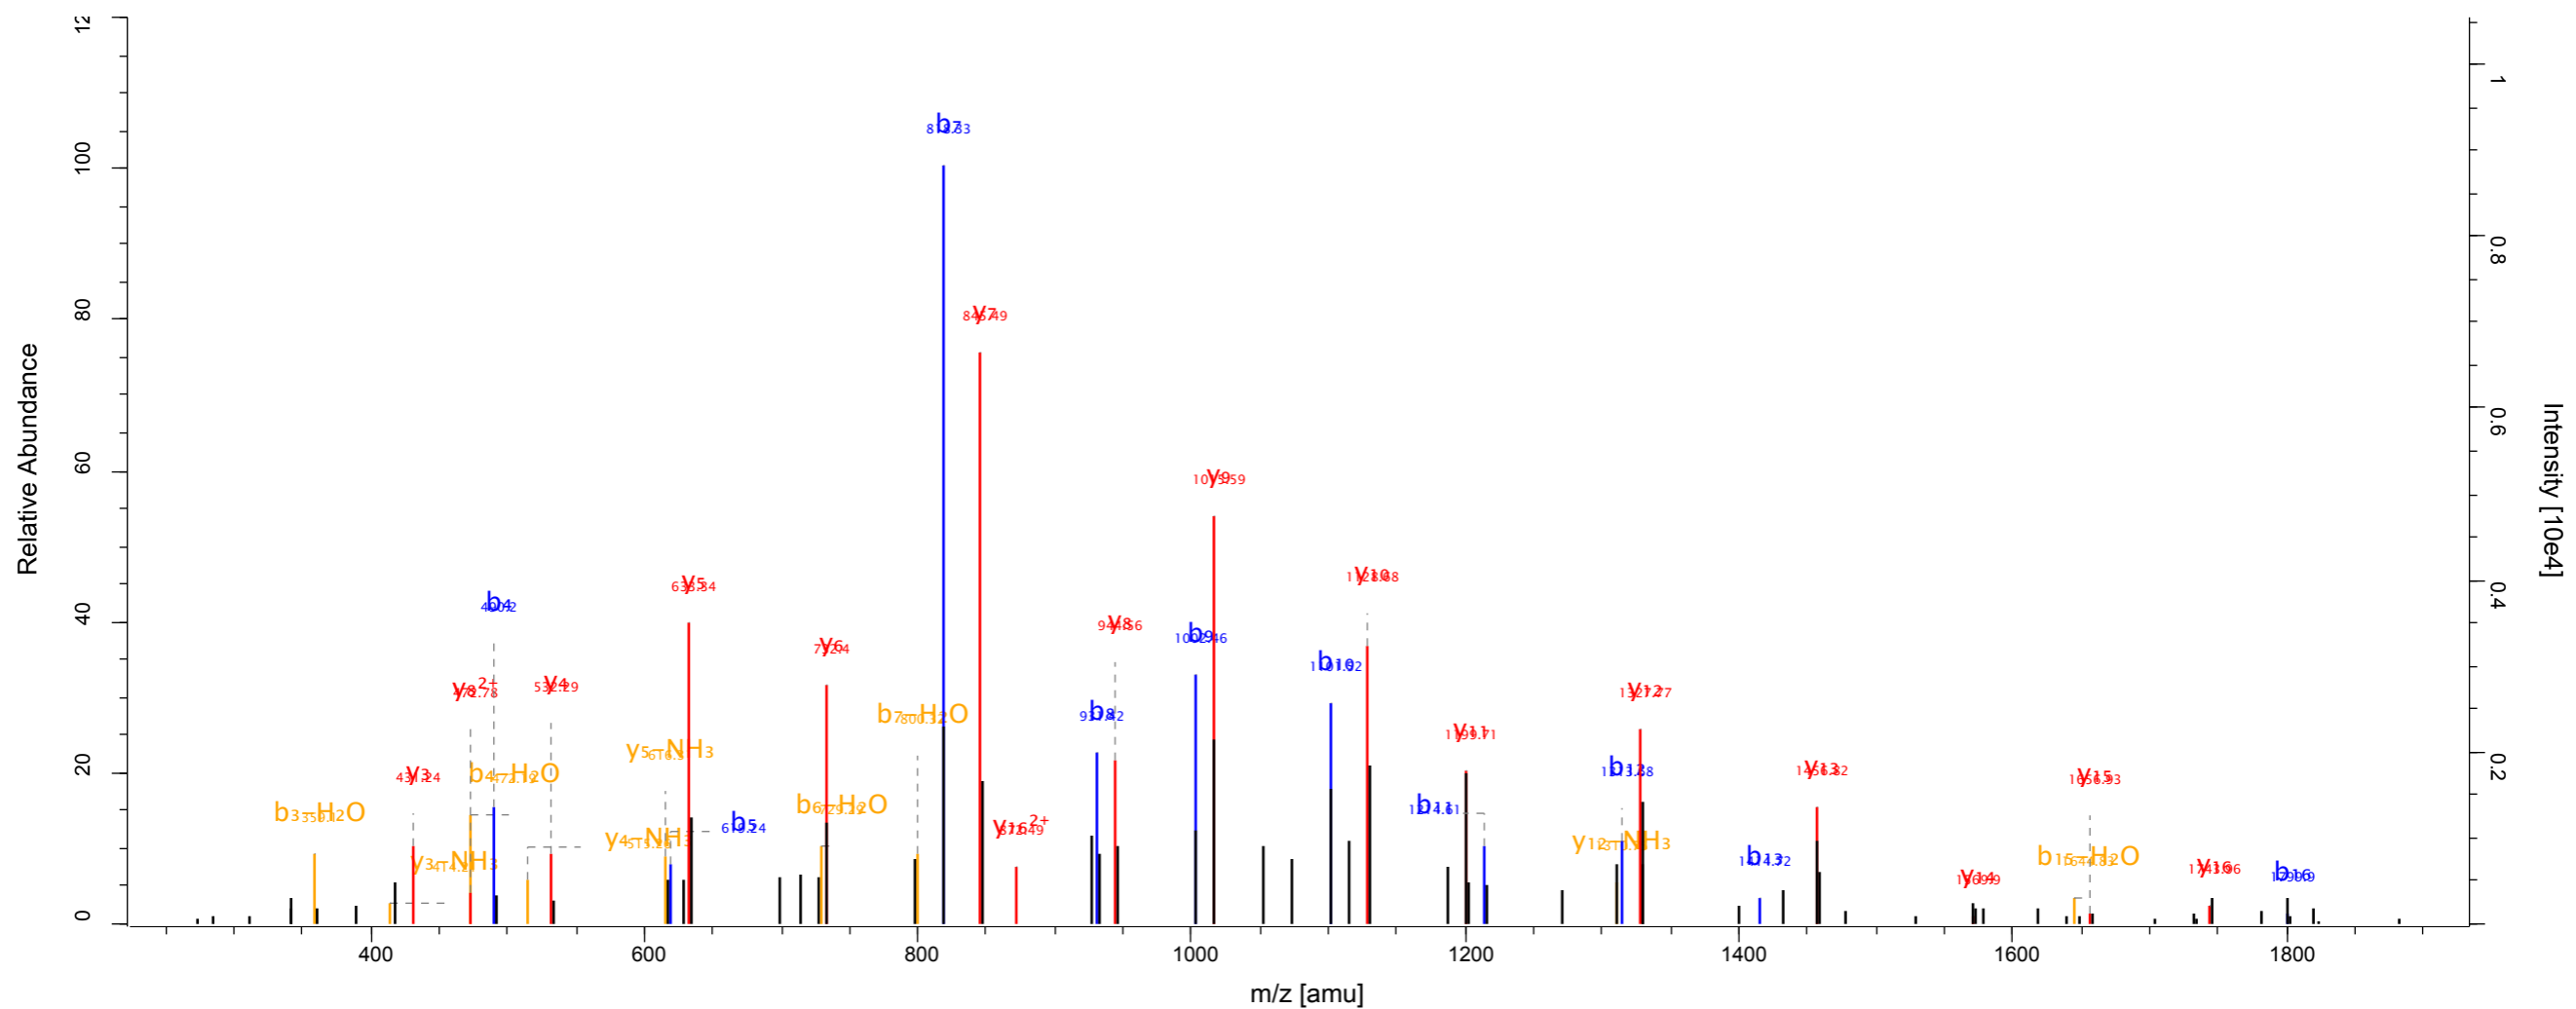

precursor information

|                   |                  |
|-------------------|------------------|
| Mass:             | 1044.00755       |
| m/z:              | 872.50605        |
| Charge:           | 2+               |
| Retention time:   | 122.025012817282 |
| Score:            | 171.2645         |
| Mass Error [ppm]: | -0.17817         |
| PEP:              | 0.7868512        |
| Precursor Type:   | ISO              |

| b ion      |                |    |     |    | y ion          |            | y <sup>2+</sup> ion |            |
|------------|----------------|----|-----|----|----------------|------------|---------------------|------------|
| Δ dalton   | mass           |    | seq |    | Δ dalton       | mass       | Δ dalton            | mass       |
|            | 203.048489354  | 1  | C   | 16 |                |            |                     |            |
|            | 290.080517764  | 2  | S   | 15 | 1743.963961674 | -0.2192107 | 872.48561907        | -0.020287  |
|            | 377.112546174  | 3  | S   | 14 | 1656.931933264 | +0.0628177 | 1656.931933264      |            |
| -0.2229773 | 490.196610154  | 4  | I   | 13 | 1569.899904854 | -0.106814  | 1569.899904854      |            |
| +0.1047909 | 619.239203251  | 5  | E   | 12 | 1456.815840874 | -0.0972129 | 1456.815840874      |            |
|            | 747.297780762  | 6  | Q   | 11 | 1327.773247778 | +0.0130071 | 1327.773247778      |            |
| +0.0302788 | 818.33489455   | 7  | A   | 10 | 1199.714670266 | -0.151682  | 1199.714670266      |            |
| -0.1688365 | 931.41895853   | 8  | I   | 9  | 1128.677556478 | -0.0878348 | 1128.677556478      |            |
| -0.0546441 | 1002.456072318 | 9  | A   | 8  | 1015.593492498 | +0.0465832 | 1015.593492498      |            |
| -0.1106679 | 1101.524486234 | 10 | V   | 7  | 944.55637871   | +0.1233088 | 472.781827588       | +0.2847007 |
| -0.3736869 | 1214.608550215 | 11 | I   | 6  | 845.487964794  | +0.0872916 | 845.487964794       |            |
| -0.1911243 | 1313.676964131 | 12 | V   | 5  | 732.403900814  | +0.1250909 | 732.403900814       |            |
| -0.2250088 | 1414.724642605 | 13 | T   | 4  | 633.335486897  | -0.0035167 | 633.335486897       |            |
|            | 1515.772321079 | 14 | T   | 3  | 532.287808423  | +0.1343718 | 532.287808423       |            |
|            | 1662.840734995 | 15 | F   | 2  | 431.240129949  | -0.0012383 | 431.240129949       |            |
| +0.2132682 | 1799.899646858 | 16 | H   | 1  | 284.171716033  |            | 284.171716033       |            |
|            |                | 17 | K   | 0  | 147.112804171  |            | 147.112804171       |            |

general information

|                       |          |
|-----------------------|----------|
| Annotation:           | 15 of 17 |
| AminoAcids Coverage:  | 88 %     |
| Intensity Coverage:   | 62 %     |
| Peak Coverage:        | 26 %     |
| Protein Localisation: | 2 ... 18 |

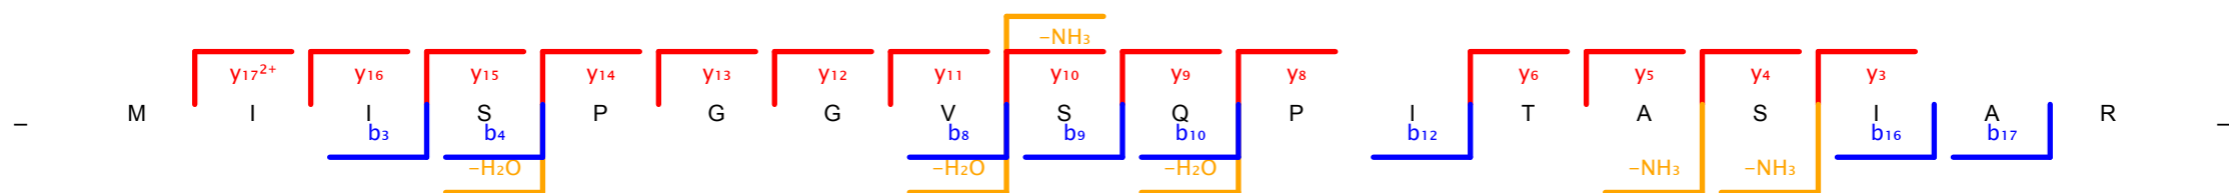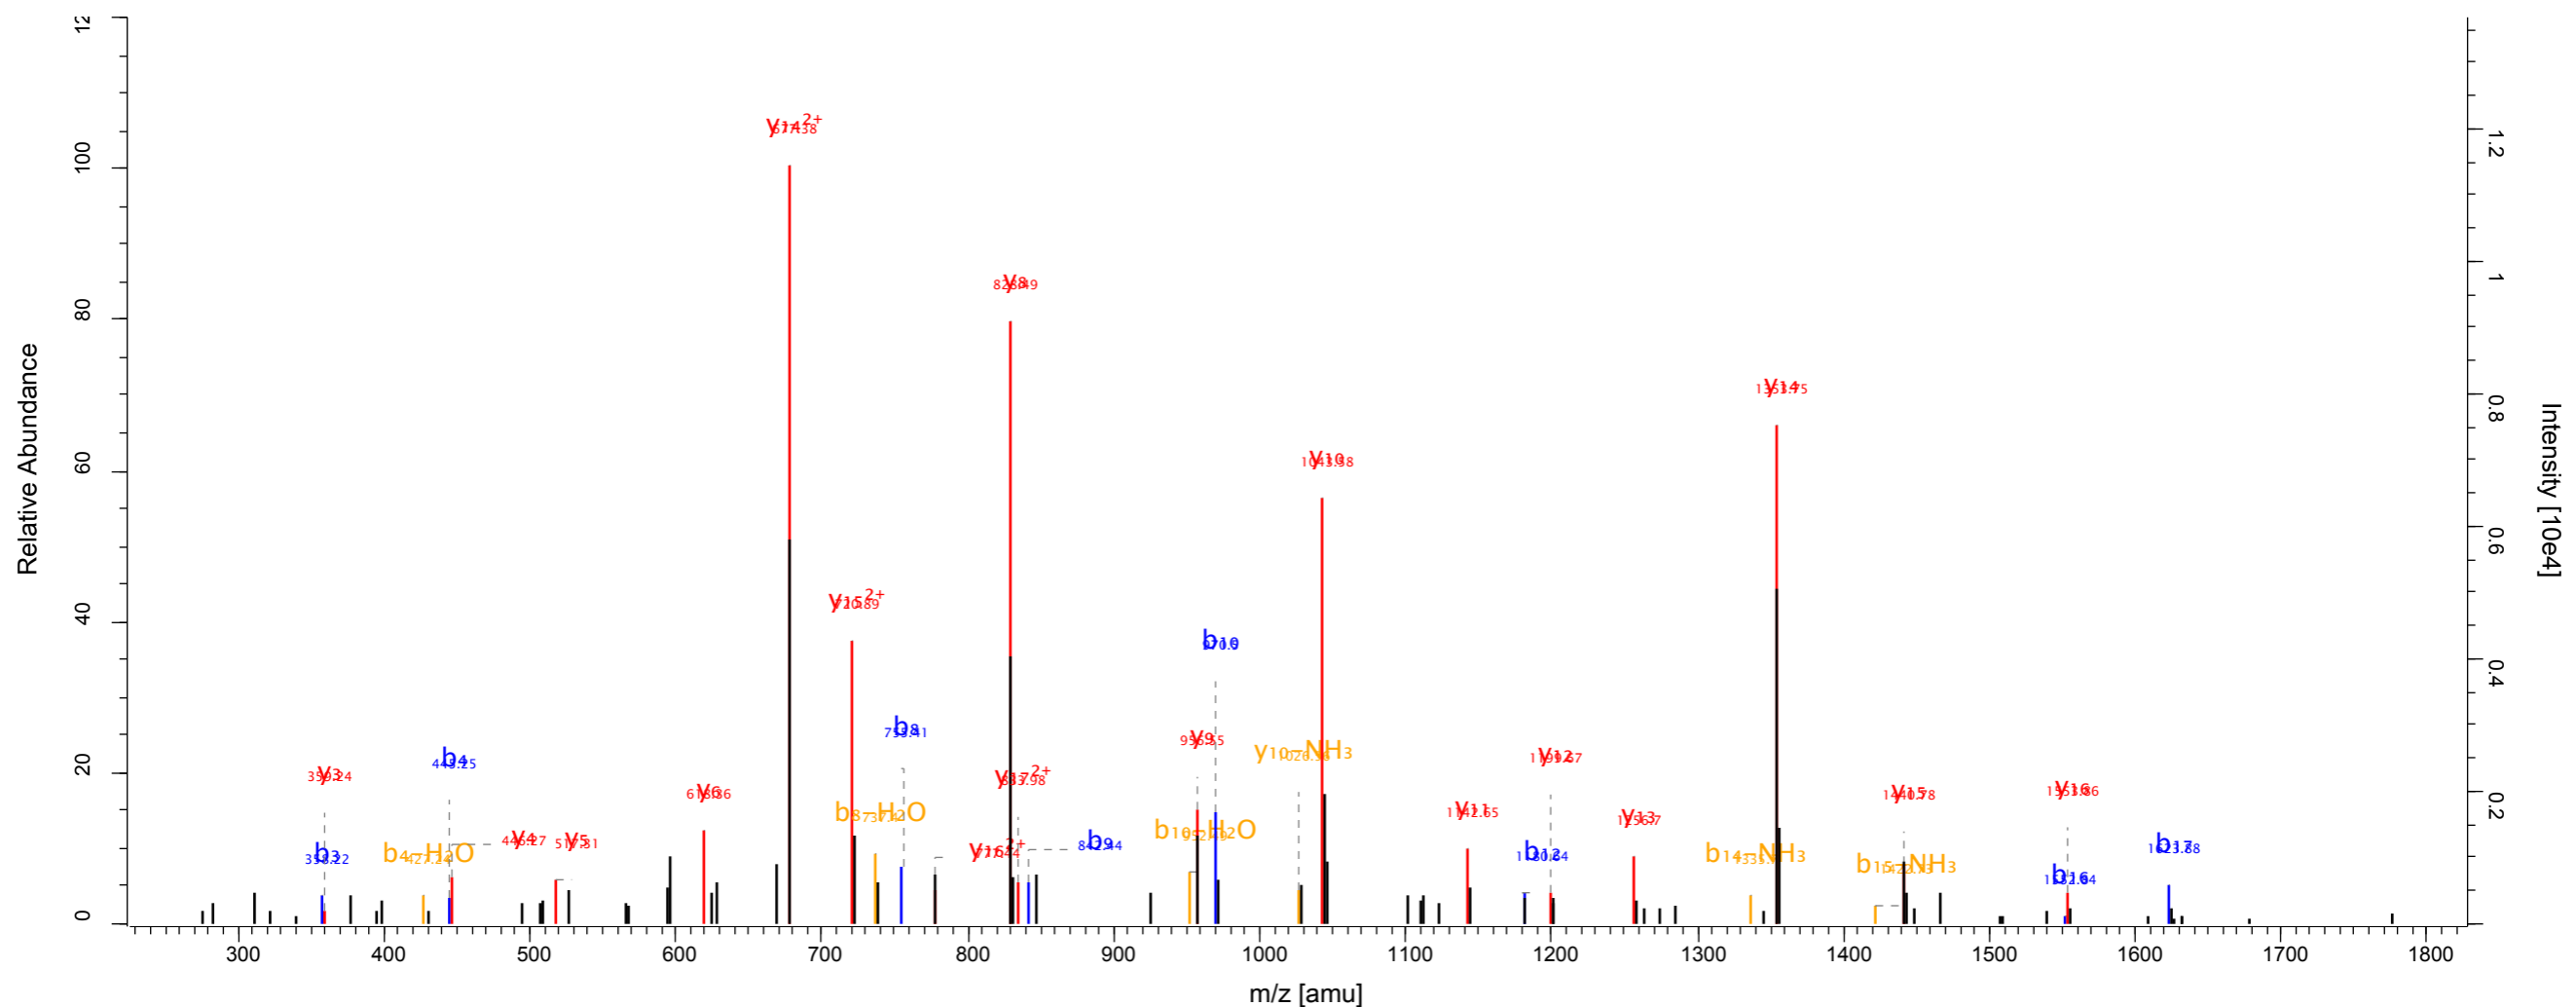

precursor information

|                   |                 |
|-------------------|-----------------|
| Mass:             | 1706.08165      |
| m/z:              | 800.4081        |
| Charge:           | 2+              |
| Retention time:   | 100.07063202457 |
| Score:            | 147.0666        |
| Mass Error (ppm): | 0.11629         |
| DEP:              | 7.00075_06      |
| Precursor Type:   | ISO             |

| b ion      |                |    |     |    | y ion          |            | y <sup>2+</sup> ion |            |
|------------|----------------|----|-----|----|----------------|------------|---------------------|------------|
| Δ dalton   | mass           |    | seq |    | Δ dalton       | mass       | Δ dalton            | mass       |
|            | 132.047761073  | 1  | M   | 17 |                |            |                     |            |
|            | 245.131825053  | 2  | I   | 16 | 1666.948645961 |            | 833.977961214       | -0.0859934 |
| -0.0926285 | 358.215889034  | 3  | I   | 15 | 1553.86458198  | +0.137127  | 777.435929224       | -0.143937  |
| -0.0835498 | 445.247917444  | 4  | S   | 14 | 1440.780518    | +0.0447994 | 720.893897233       | +0.3180779 |
|            | 542.300681296  | 5  | P   | 13 | 1353.74848959  | -0.0272982 | 677.377883028       | +0.0408181 |
|            | 599.322145019  | 6  | G   | 12 | 1256.695725738 | +0.0713641 | 1256.695725738      |            |
|            | 656.343608743  | 7  | G   | 11 | 1199.674262014 | +0.2587214 | 1199.674262014      |            |
| -0.1538439 | 755.412022659  | 8  | V   | 10 | 1142.652798291 | -0.0428129 | 1142.652798291      |            |
| +0.0830485 | 842.444051069  | 9  | S   | 9  | 1043.584384375 | +0.0606352 | 1043.584384375      |            |
| -0.0266154 | 970.50262858   | 10 | Q   | 8  | 956.552355965  | +0.0467651 | 956.552355965       |            |
|            | 1067.555392432 | 11 | P   | 7  | 828.493778453  | +0.0405843 | 828.493778453       |            |
| +0.2905973 | 1180.639456413 | 12 | I   | 6  | 731.441014601  |            | 731.441014601       |            |
|            | 1281.687134887 | 13 | T   | 5  | 618.356950621  | -0.0005663 | 618.356950621       |            |
|            | 1352.724248675 | 14 | A   | 4  | 517.309272147  | +0.0258719 | 517.309272147       |            |
|            | 1439.756277084 | 15 | S   | 3  | 446.272158359  | +0.0376561 | 446.272158359       |            |
| -0.1551604 | 1552.840341065 | 16 | I   | 2  | 359.240129949  | +0.0763068 | 359.240129949       |            |
| -0.164198  | 1623.877454853 | 17 | A   | 1  | 246.156065969  |            | 246.156065969       |            |
|            |                | 18 | R   | 0  | 175.118952181  |            | 175.118952181       |            |

general information

|                       |             |
|-----------------------|-------------|
| Annotation:           | 16 of 18    |
| AminoAcids Coverage:  | 80.0%       |
| Intensity Coverage:   | 57.0%       |
| Peak Coverage:        | 22.0%       |
| Protein Localisation: | 230 ... 247 |

Scan number 12885 Raw file 20080623\_Orbi5\_SZ\_Matrigel\_12h\_InGel\_01  
 Method ITMS; CID Genenames TMEM50A

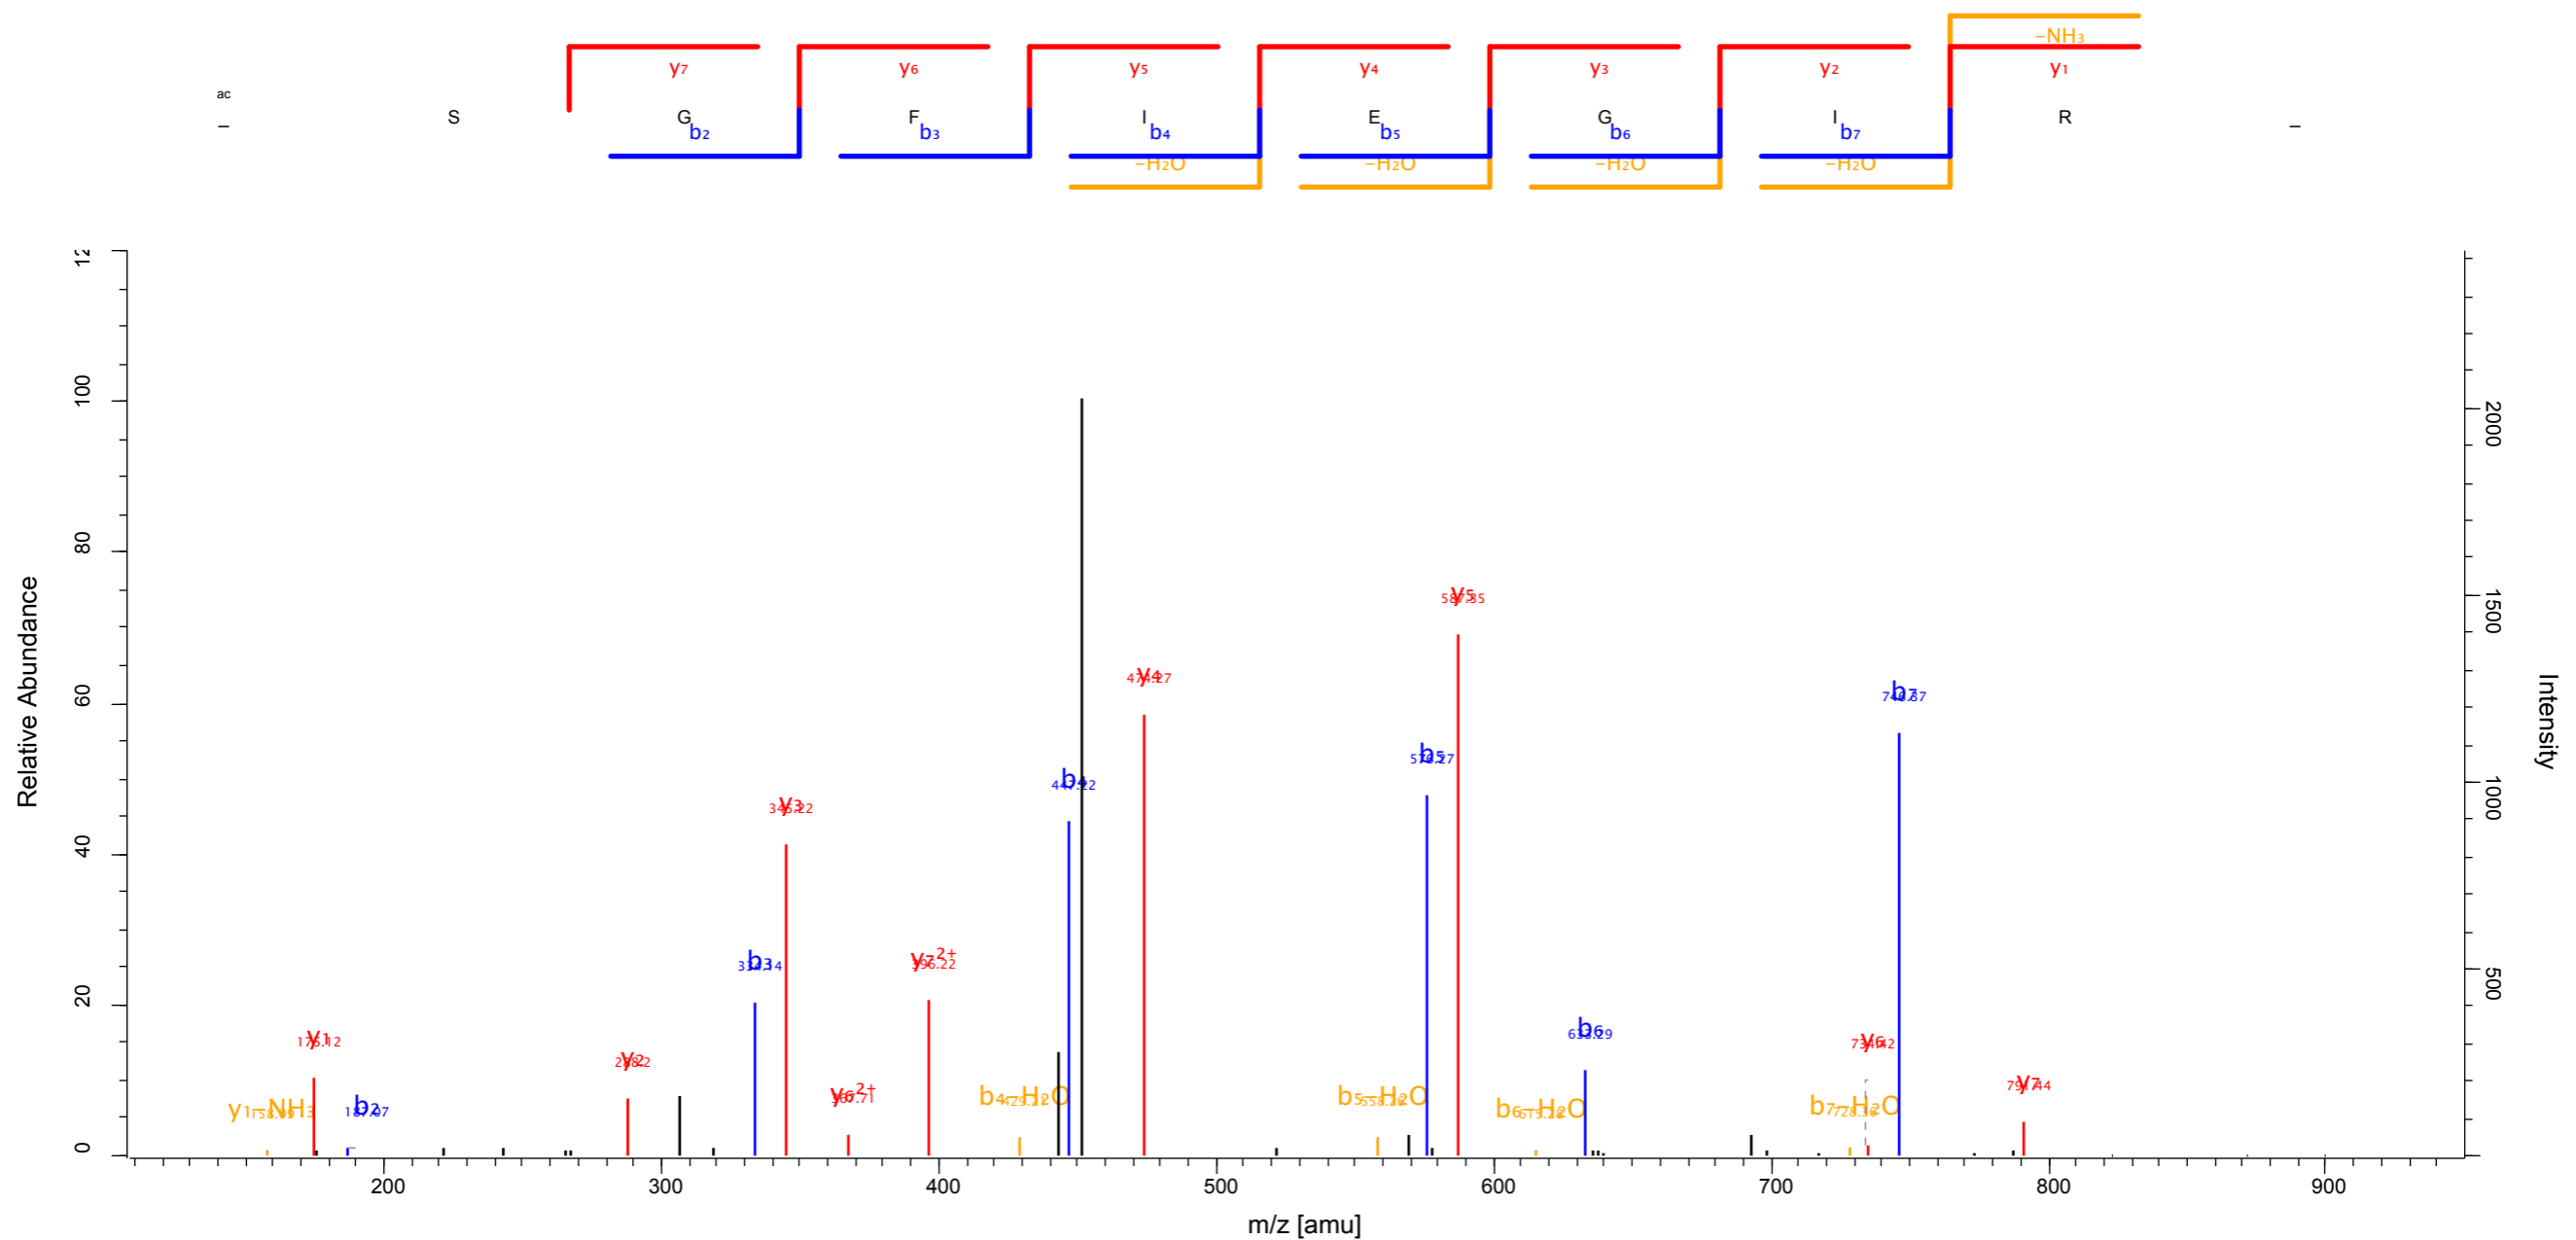

precursor information

|                       |                  |
|-----------------------|------------------|
| Mass:                 | 010.17617        |
| m/z:                  | 460.74551        |
| Charge:               | 2+               |
| Retention time:       | 04.7055002322780 |
| Score:                | 170.6618         |
| Mass Error [ppm]:     | 0.15286          |
| DEP:                  | 0.00028085       |
| Annotation:           | 7 of 8           |
| AminoAcids Coverage:  | 88 %             |
| Intensity Coverage:   | 75 %             |
| Peak Coverage:        | 17 %             |
| Protein Localisation: | 2 ... 9          |

| b ion      |               |   |     |   | y ion         |            | y <sup>2+</sup> ion |            |
|------------|---------------|---|-----|---|---------------|------------|---------------------|------------|
| Δ dalton   | mass          |   | seq |   | Δ dalton      | mass       | Δ dalton            | mass       |
|            | 130.049869563 | 1 | S   | 7 |               |            |                     |            |
| -0.0613388 | 187.071333286 | 2 | G   | 6 | 791.441014601 | +0.0926158 | 396.224145534       | +0.101355  |
| +0.0427479 | 334.139747203 | 3 | F   | 5 | 734.419550878 | +0.1307421 | 367.713413672       | +0.0479389 |
| +0.0444078 | 447.223811183 | 4 | I   | 4 | 587.351136962 | +0.1275007 | 587.351136962       |            |
| -0.03148   | 576.266404279 | 5 | E   | 3 | 474.267072981 | +0.1287705 | 474.267072981       |            |
| -0.0207171 | 633.287868003 | 6 | G   | 2 | 345.224479885 | +0.0760877 | 345.224479885       |            |
| +0.0576945 | 746.371931983 | 7 | I   | 1 | 288.203016161 | +0.0082265 | 288.203016161       |            |
|            |               | 8 | R   | 0 | 175.118952181 | -0.1036018 | 175.118952181       |            |

Scan number 13703 Raw file 20080623\_Orbi5\_SZ\_Matrigel\_12h\_InGel\_01  
 Method ITMS; CID Genenames LYRM5

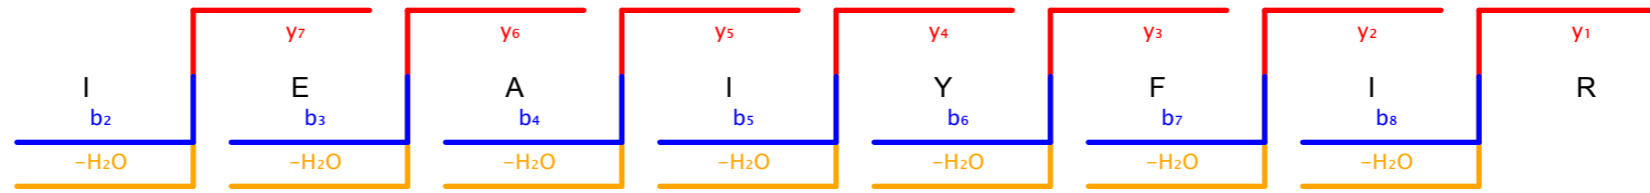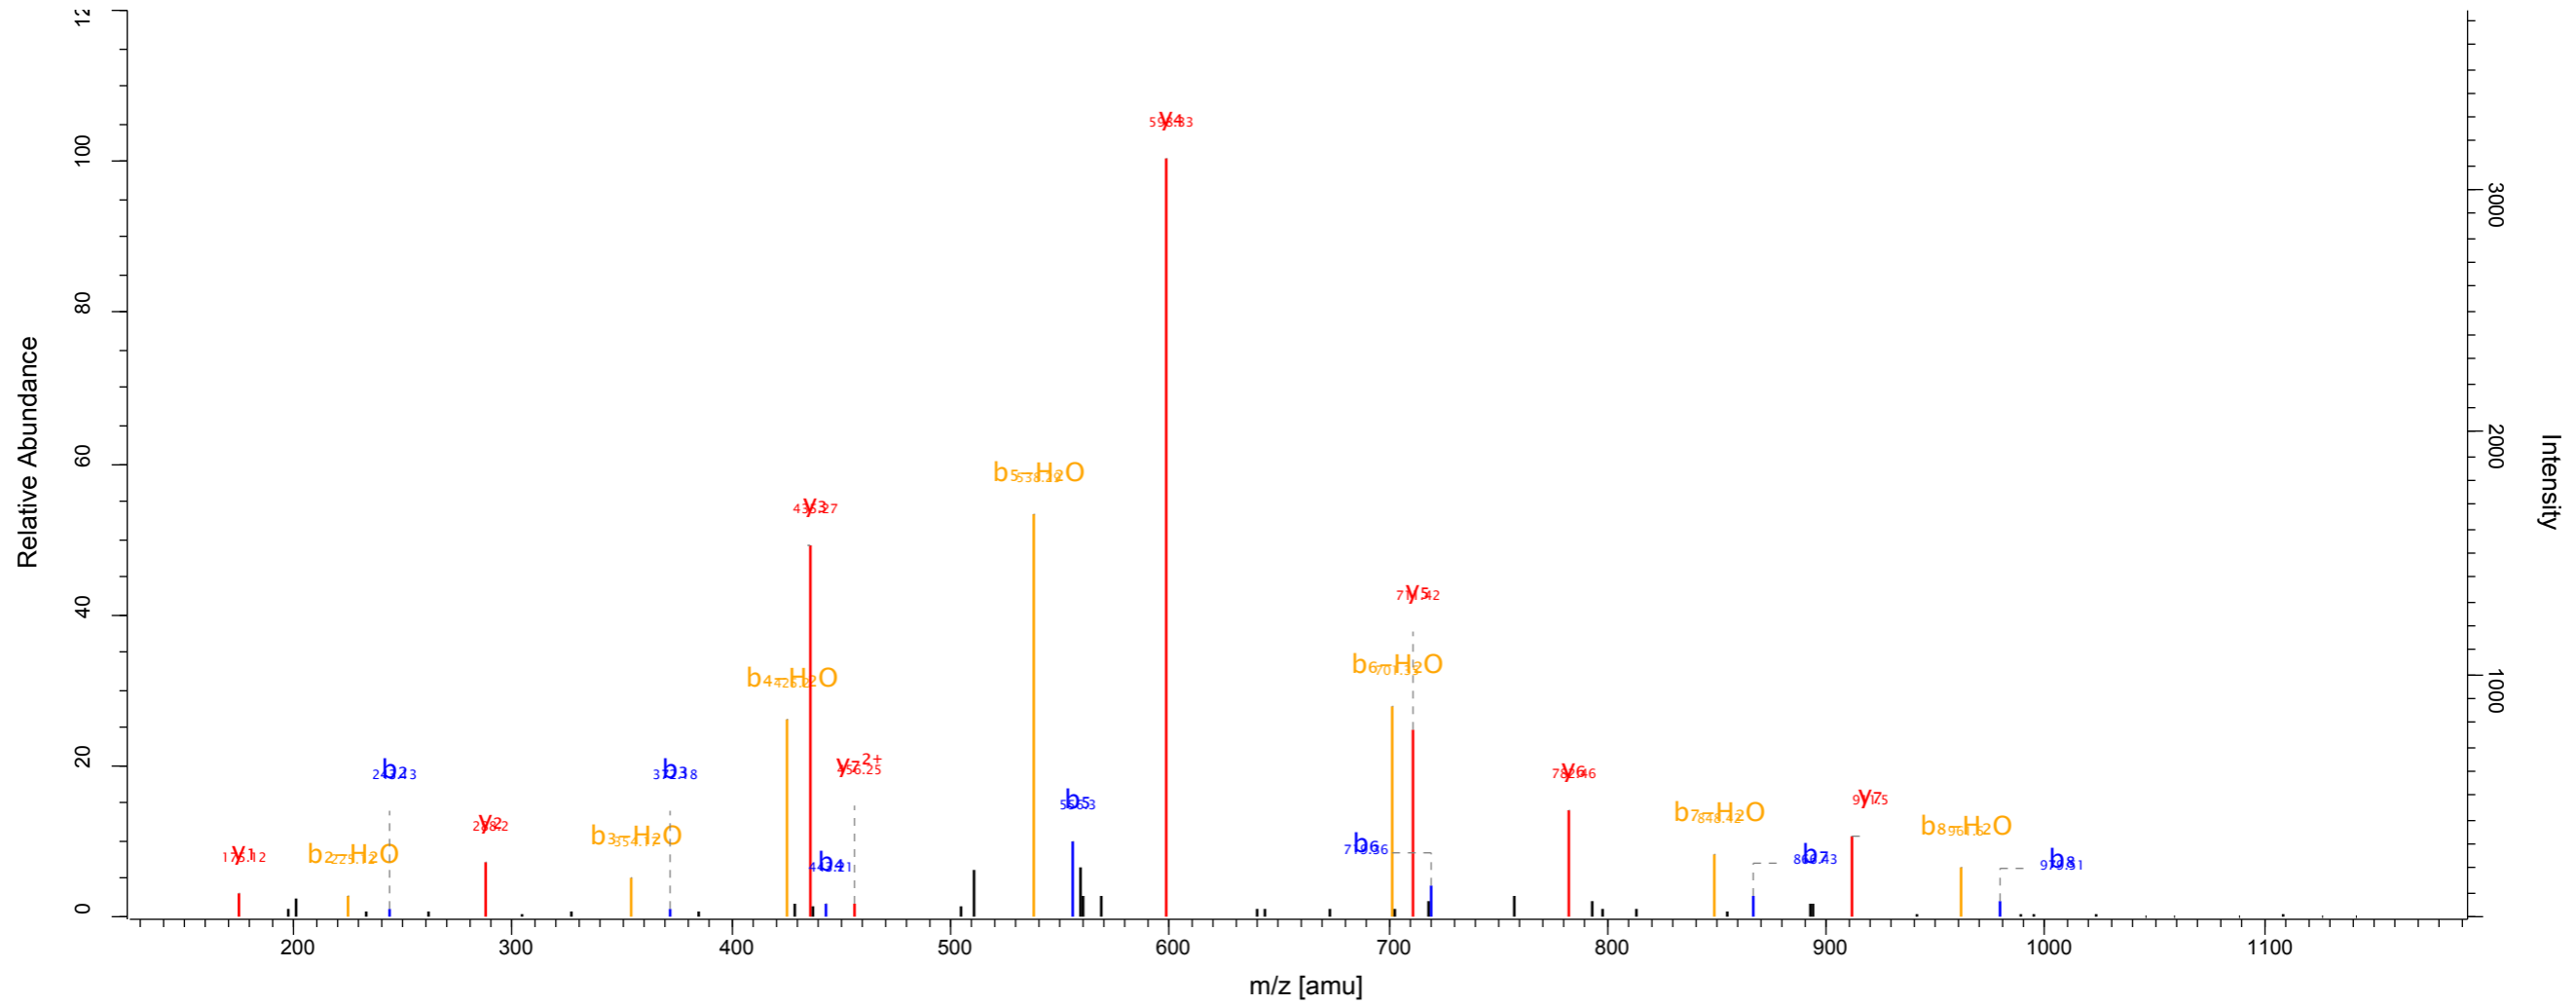

precursor information

|                       |                  |
|-----------------------|------------------|
| Mass:                 | 1152.61780       |
| m/z:                  | 577.31622        |
| Charge:               | 2+               |
| Retention time:       | 100.285040707031 |
| Score:                | 207.9511         |
| Mass Error (ppm):     | -0.018614        |
| gPED:                 | 7.6627E-15       |
| Annotation:           | 8 of 9           |
| AminoAcids Coverage:  | 80%              |
| Intensity Coverage:   | 88%              |
| Peak Coverage:        | 38%              |
| Protein Localisation: | 63 ... 71        |

| b ion      |               |   |     |   | y ion          |            | y <sup>2+</sup> ion |            |
|------------|---------------|---|-----|---|----------------|------------|---------------------|------------|
| Δ dalton   | mass          |   | seq |   | Δ dalton       | mass       | Δ dalton            | mass       |
|            | 130.049869563 | 1 | E   | 8 |                |            |                     |            |
| +0.0670247 | 243.133933543 | 2 | I   | 7 | 1024.582593461 |            | 1024.582593461      |            |
| +0.1479973 | 372.176526639 | 3 | E   | 6 | 911.49852948   | +0.137701  | 456.252902973       | +0.1722679 |
| +0.059736  | 443.213640427 | 4 | A   | 5 | 782.455936384  | -0.024662  | 782.455936384       |            |
| -0.0118768 | 556.297704408 | 5 | I   | 4 | 711.418822596  | +0.0348517 | 711.418822596       |            |
| +0.0794578 | 719.361032946 | 6 | Y   | 3 | 598.334758616  | +0.0456125 | 598.334758616       |            |
| +0.0297817 | 866.429446862 | 7 | F   | 2 | 435.271430078  | +0.0913019 | 435.271430078       |            |
| +0.0645531 | 979.513510843 | 8 | I   | 1 | 288.203016161  | -0.0478648 | 288.203016161       |            |
|            |               | 9 | R   | 0 | 175.118952181  | -0.02743   | 175.118952181       |            |

Scan number 6382 Raw file 20080623\_Orbi5\_SZ\_Matrigel\_12h\_InGel\_01  
 Method ITMS; CID Genenames APOC3

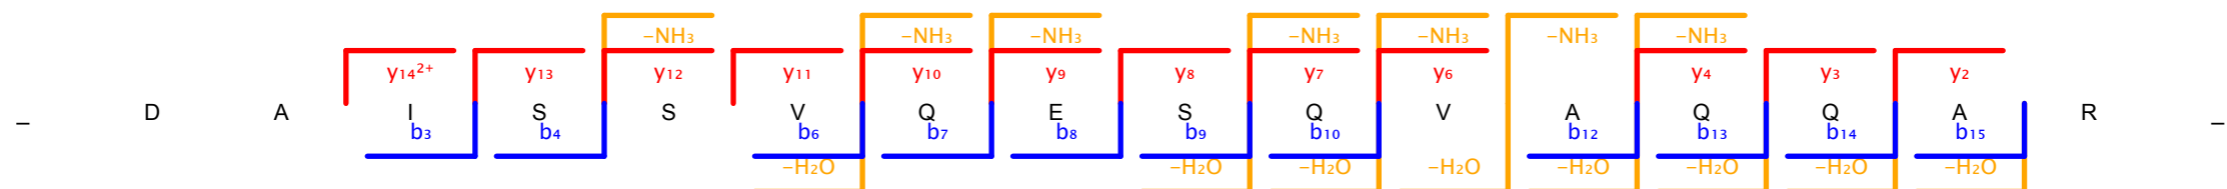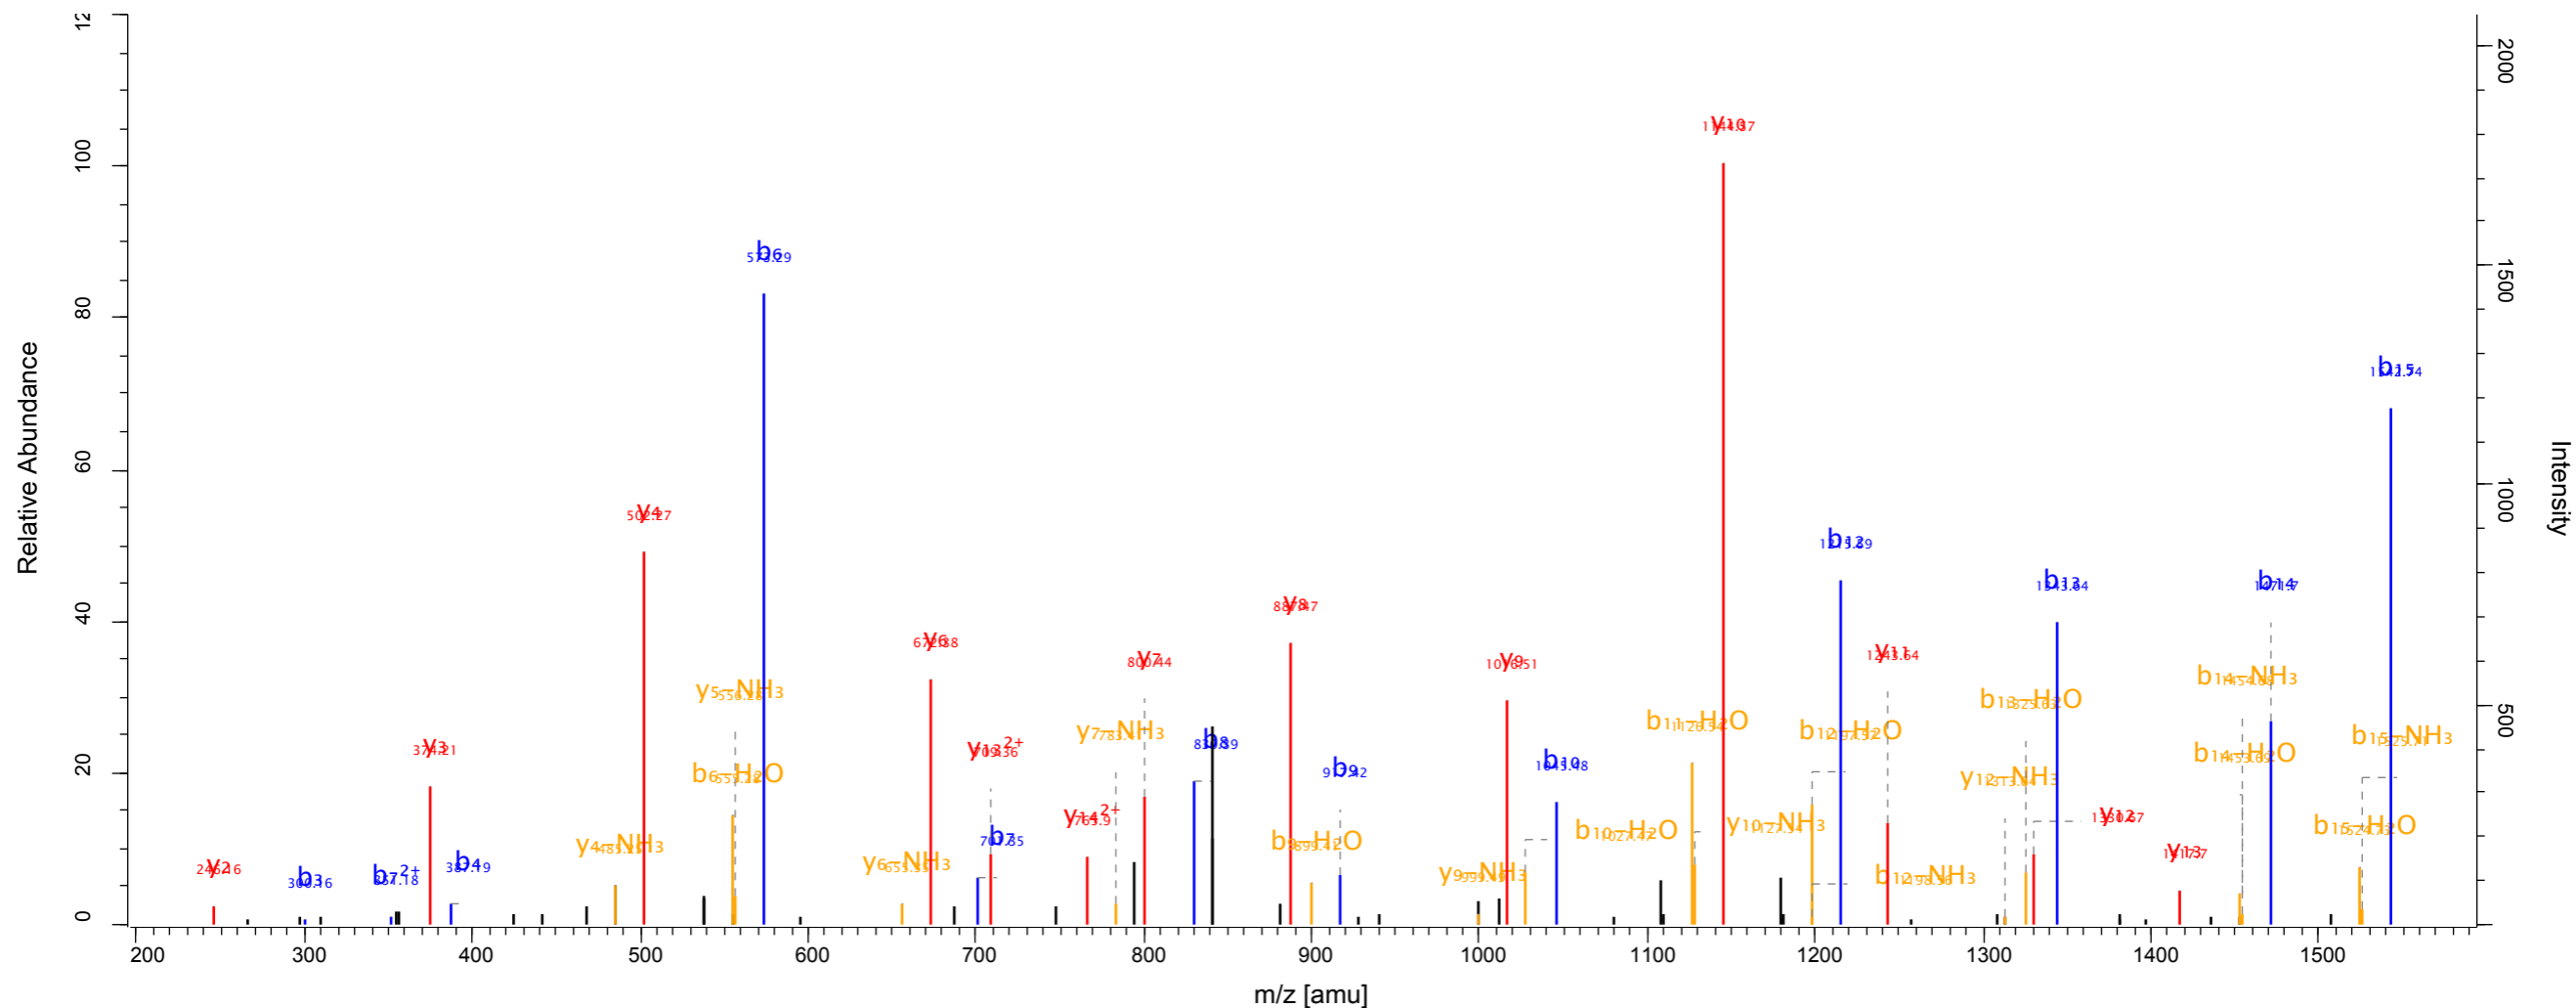

precursor information

|                   |                  |
|-------------------|------------------|
| Mass:             | 1715.84275       |
| m/z:              | 858.02015        |
| Charge:           | 2+               |
| Retention time:   | 55.0172842022105 |
| Score:            | 222.2167         |
| Mass Error [ppm]: | 0.052502         |
| DEP:              | 6.04825_140      |
| Precursor Type:   | ISO              |

general information

|                       |           |
|-----------------------|-----------|
| Annotation:           | 13 of 16  |
| AminoAcids Coverage:  | 81 %      |
| Intensity Coverage:   | 87 %      |
| Peak Coverage:        | 54 %      |
| Protein Localisation: | 45 ... 60 |

| b <sup>2+</sup> ion |              | b ion      |              |    |     |    | y ion        |            | y <sup>2+</sup> ion |            |
|---------------------|--------------|------------|--------------|----|-----|----|--------------|------------|---------------------|------------|
| Δ dalton            | mass         | Δ dalton   | mass         |    | seq |    | Δ dalton     | mass       | Δ dalton            | mass       |
|                     | 116.0342195  |            | 116.0342195  | 1  | D   | 15 |              |            |                     |            |
|                     | 187.07133329 |            | 187.07133329 | 2  | A   | 14 | 1601.8241737 |            | 1601.8241737        |            |
|                     | 300.15539727 | +0.0144636 | 300.15539727 | 3  | I   | 13 | 1530.7870599 |            | 765.8971682         | -0.0119753 |
|                     | 387.18742568 | +0.0989818 | 387.18742568 | 4  | S   | 12 | 1417.702996  | +0.048591  | 709.35513621        | +0.1144072 |
|                     | 474.21945409 |            | 474.21945409 | 5  | S   | 11 | 1330.6709676 | +0.1221233 | 1330.6709676        |            |
|                     | 573.287868   | +0.010777  | 573.287868   | 6  | V   | 10 | 1243.6389391 | +0.1167982 | 1243.6389391        |            |
| +0.1255682          | 351.17686099 | -0.0662331 | 701.34644551 | 7  | Q   | 9  | 1144.5705252 | +0.0106515 | 1144.5705252        |            |
|                     | 830.38903861 | +0.0355219 | 830.38903861 | 8  | E   | 8  | 1016.5119477 | +0.0232696 | 1016.5119477        |            |
|                     | 917.42106702 | -0.0856178 | 917.42106702 | 9  | S   | 7  | 887.46935462 | +0.0249691 | 887.46935462        |            |
|                     | 1045.4796445 | -0.0123594 | 1045.4796445 | 10 | Q   | 6  | 800.43732621 | +0.1080229 | 800.43732621        |            |
|                     | 1144.5480584 |            | 1144.5480584 | 11 | V   | 5  | 672.3787487  | +0.1255238 | 672.3787487         |            |
|                     | 1215.5851722 | -0.0478187 | 1215.5851722 | 12 | A   | 4  | 573.31033478 |            | 573.31033478        |            |
|                     | 1343.6437497 | -0.0586667 | 1343.6437497 | 13 | Q   | 3  | 502.27322099 | +0.1736174 | 502.27322099        |            |
|                     | 1471.7023273 | -0.0121417 | 1471.7023273 | 14 | Q   | 2  | 374.21464348 | +0.0891895 | 374.21464348        |            |
|                     | 1542.739441  | -0.034485  | 1542.739441  | 15 | A   | 1  | 246.15606597 | +0.0365915 | 246.15606597        |            |
|                     |              |            |              | 16 | R   | 0  | 175.11895218 |            | 175.11895218        |            |

Scan number 8767 Raw file 20080623\_Orbi5\_SZ\_Matrigel\_12h\_InGel\_01  
 Method ITMS; CID Genenames MT-ND3;ND3

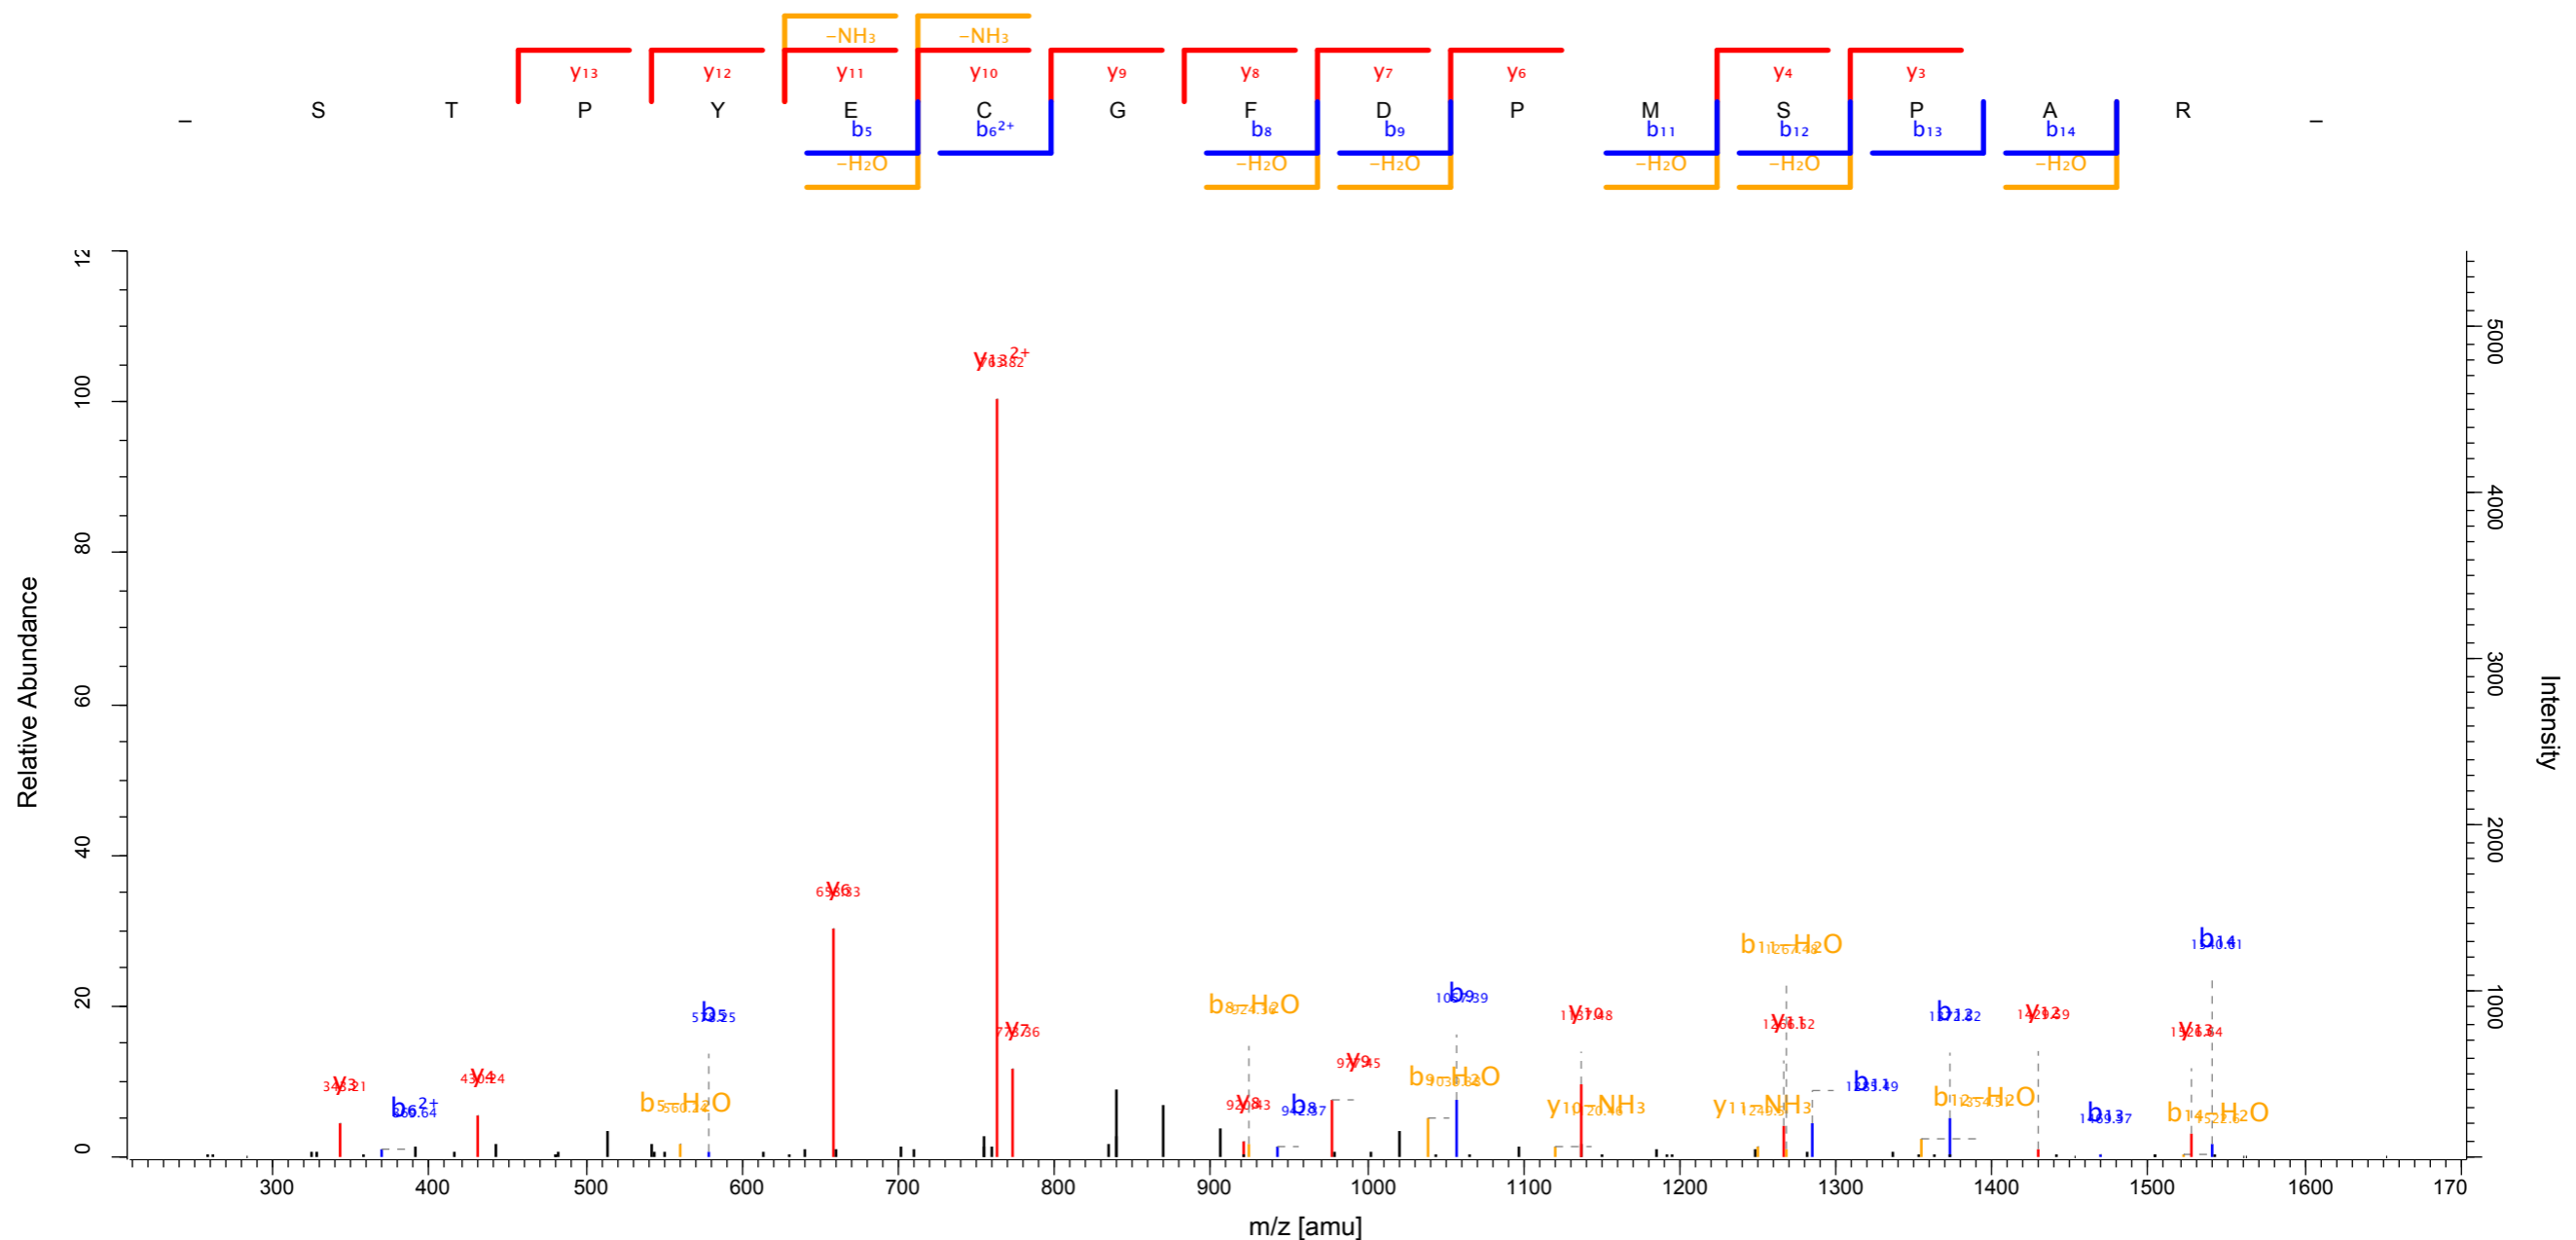

precursor information

|                   |                  |
|-------------------|------------------|
| Mass:             | 1712.71268       |
| m/z:              | 857.86262        |
| Charge:           | 2+               |
| Potenttime:       | 68.8057250076562 |
| Score:            | 108.1864         |
| Mass Error [ppm]: | -0.006727        |
| PEP:              | 8.1654E-21       |
| Precursor Type:   | MULTI            |

general information

|                       |           |
|-----------------------|-----------|
| Annotation:           | 12 of 15  |
| AminoAcids Coverage:  | 80 %      |
| Intensity Coverage:   | 77 %      |
| Peak Coverage:        | 22 %      |
| Protein Localisation: | 34 ... 48 |

| b <sup>2+</sup> ion |              | b ion      |              |     | y ion |          | y <sup>2+</sup> ion |            |              |            |
|---------------------|--------------|------------|--------------|-----|-------|----------|---------------------|------------|--------------|------------|
| Δ dalton            | mass         | Δ dalton   | mass         | seq |       | Δ dalton | mass                | Δ dalton   | mass         |            |
|                     | 88.039304876 |            | 88.039304876 | 1   | S     | 14       |                     |            |              |            |
|                     | 189.08698335 |            | 189.08698335 | 2   | T     | 13       | 1627.6879395        |            | 1627.6879395 |            |
|                     | 286.1397472  |            | 286.1397472  | 3   | P     | 12       | 1526.640261         | +0.1116921 | 763.82376876 | +0.1053084 |
|                     | 449.20307574 |            | 449.20307574 | 4   | Y     | 11       | 1429.5874972        | +0.0752225 | 1429.5874972 |            |
|                     | 578.24566884 | +0.0588356 | 578.24566884 | 5   | E     | 10       | 1266.5241687        | +0.0074476 | 1266.5241687 |            |
| -0.3414427          | 369.64179675 |            | 738.27631704 | 6   | C     | 9        | 1137.4815756        | +0.1424479 | 1137.4815756 |            |
|                     | 795.29778076 |            | 795.29778076 | 7   | G     | 8        | 977.45092736        | +0.0772098 | 977.45092736 |            |
|                     | 942.36619468 | +0.0271769 | 942.36619468 | 8   | F     | 7        | 920.42946364        | +0.0475871 | 920.42946364 |            |
|                     | 1057.3931377 | -0.0962627 | 1057.3931377 | 9   | D     | 6        | 773.36104972        | -0.0130883 | 773.36104972 |            |
|                     | 1154.4459016 |            | 1154.4459016 | 10  | P     | 5        | 658.33410669        | +0.012512  | 658.33410669 |            |
|                     | 1285.4863862 | +0.0513336 | 1285.4863862 | 11  | M     | 4        | 561.28134284        |            | 561.28134284 |            |
|                     | 1372.5184146 | -0.0438052 | 1372.5184146 | 12  | S     | 3        | 430.24085823        | +0.0565051 | 430.24085823 |            |
|                     | 1469.5711784 | +0.1337776 | 1469.5711784 | 13  | P     | 2        | 343.20882982        | +0.1577168 | 343.20882982 |            |
|                     | 1540.6082922 | -0.0016028 | 1540.6082922 | 14  | A     | 1        | 246.15606597        |            | 246.15606597 |            |
|                     |              |            |              | 15  | R     | 0        | 175.11895218        |            | 175.11895218 |            |



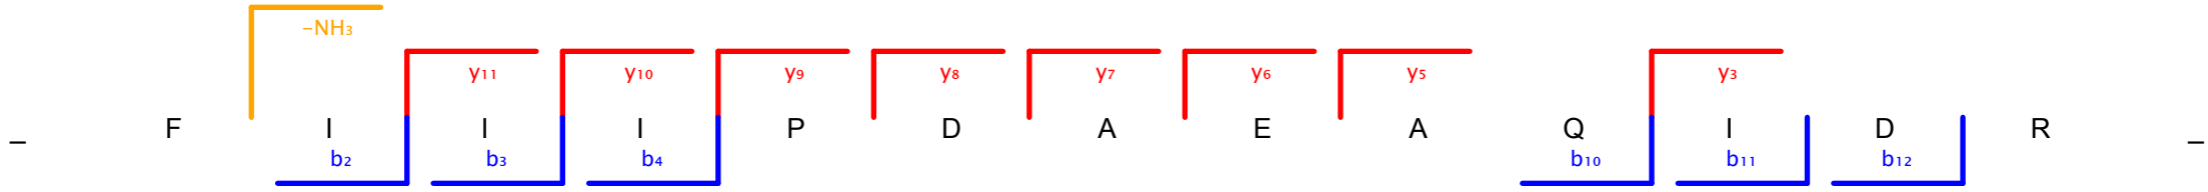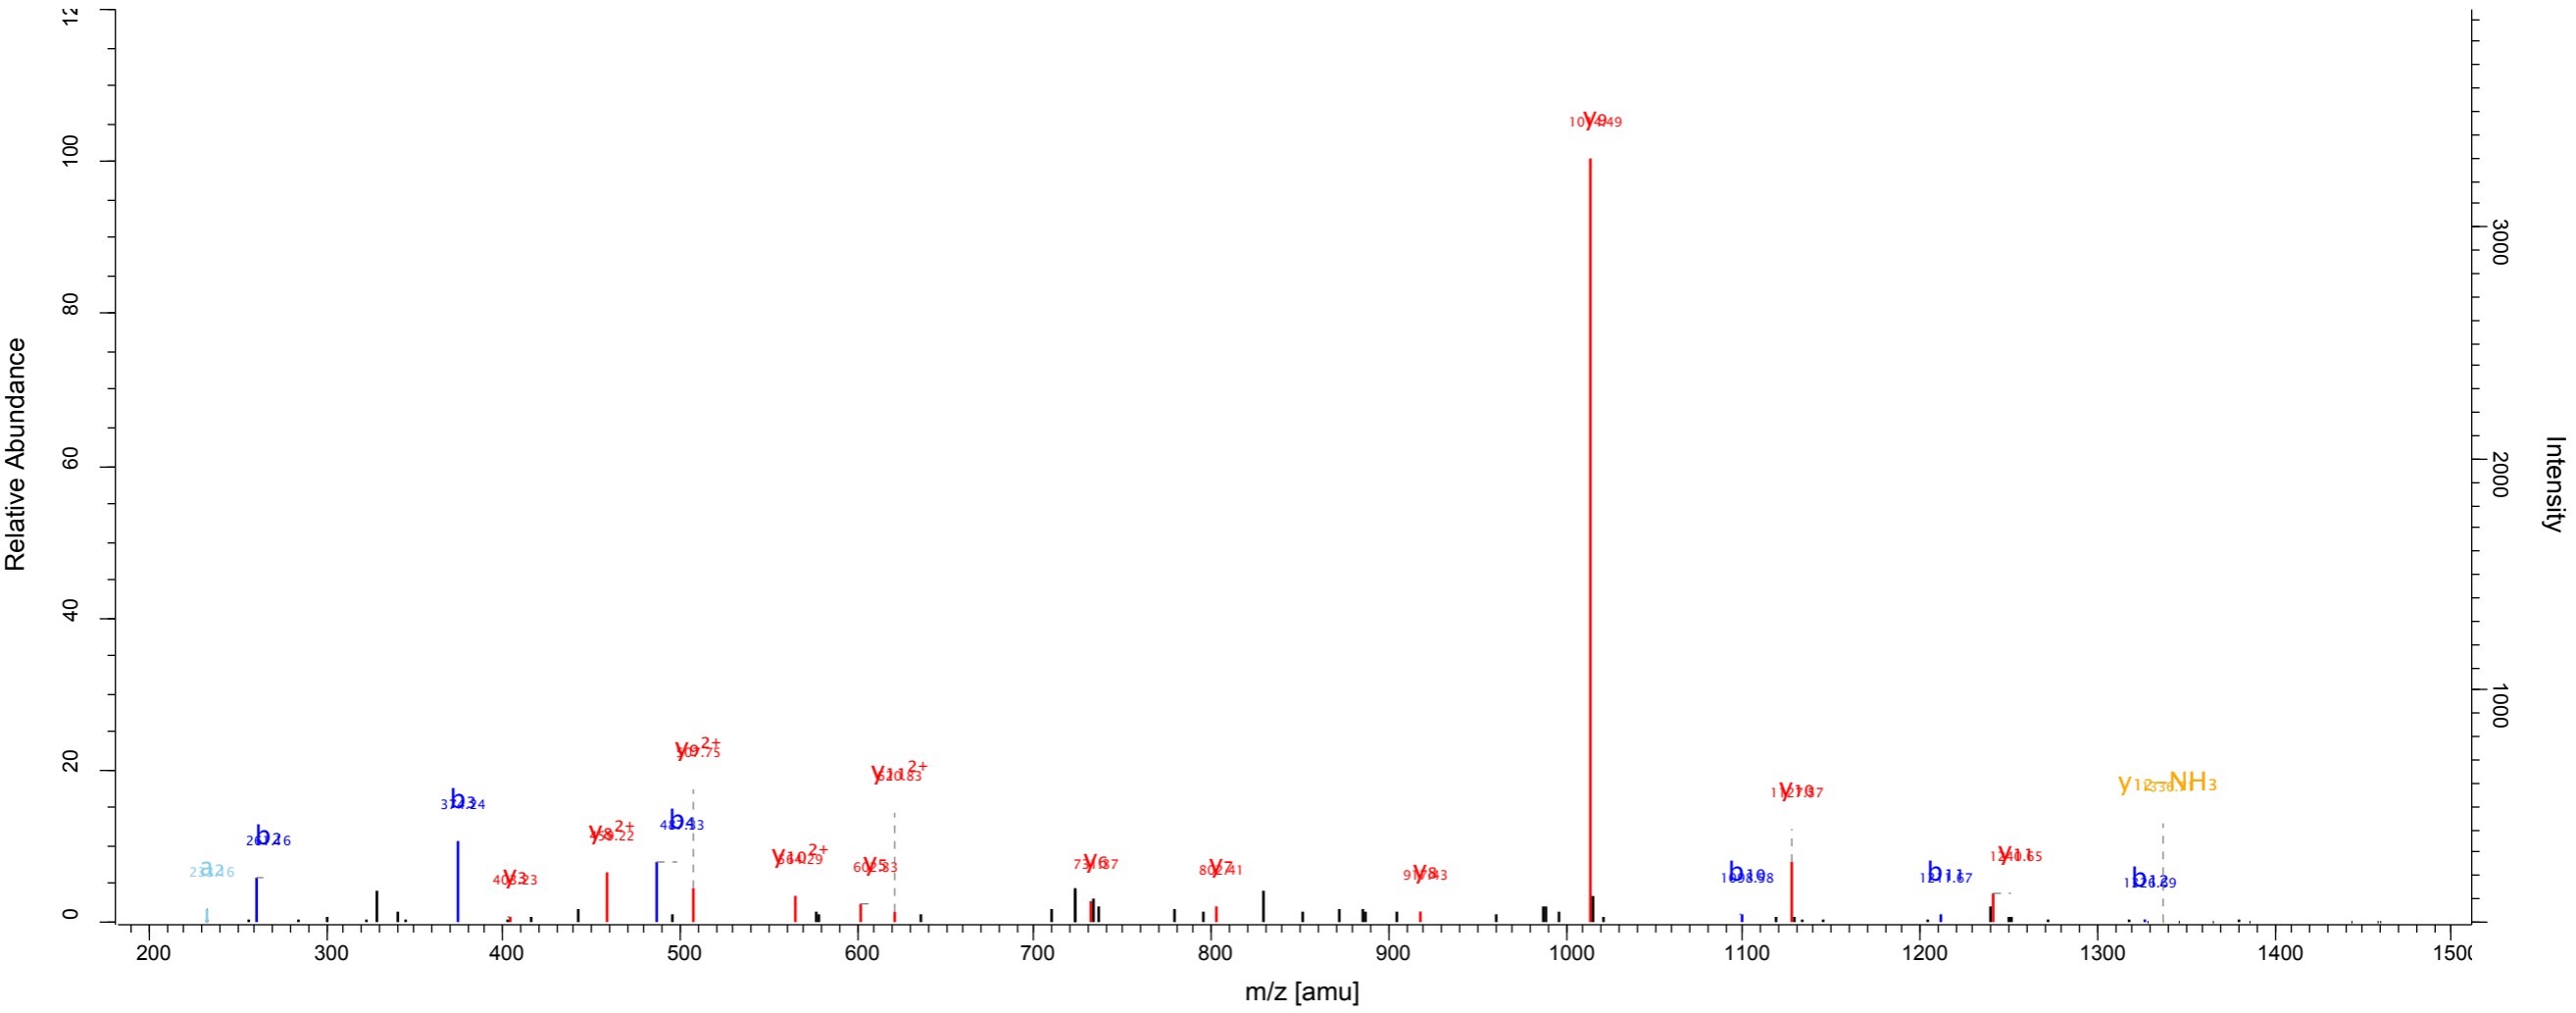

precursor information

|                   |                  |
|-------------------|------------------|
| Mass:             | 1400.70818       |
| m/z:              | 750.00636        |
| Charge:           | 2+               |
| Retention time:   | 07.5685720080460 |
| Score:            | 132.3220         |
| Mass Error (ppm): | -0.14460         |
| PEP:              | 1.0615E-05       |
| Precursor Type:   | MULTI            |

general information

|                       |           |
|-----------------------|-----------|
| Annotation:           | 11 of 12  |
| AminoAcids Coverage:  | 85 %      |
| Intensity Coverage:   | 72 %      |
| Peak Coverage:        | 78 %      |
| Protein Localisation: | 14 ... 26 |

| a ion      |              | b ion      |              |    |     |    | y ion        |            | y <sup>2+</sup> ion |            |
|------------|--------------|------------|--------------|----|-----|----|--------------|------------|---------------------|------------|
| Δ dalton   | mass         | Δ dalton   | mass         |    | seq |    | Δ dalton     | mass       | Δ dalton            | mass       |
|            | 120.08077576 |            | 148.07569038 | 1  | F   | 12 |              |            |                     |            |
| +0.0685129 | 233.16483974 | +0.0331778 | 261.15975436 | 2  | I   | 11 | 1353.7372562 |            | 1353.7372562        |            |
|            | 346.24890372 | +0.039751  | 374.24381834 | 3  | I   | 10 | 1240.6531922 | +0.2097228 | 620.83023434        | +0.0434839 |
|            | 459.3329677  | -0.0654312 | 487.32788232 | 4  | I   | 9  | 1127.5691282 | -0.0128538 | 564.28820235        | +0.1206111 |
|            | 556.38573155 |            | 584.38064618 | 5  | P   | 8  | 1014.4850643 | +0.0224431 | 507.74617036        | +0.1129605 |
|            | 671.41267459 |            | 699.40758921 | 6  | D   | 7  | 917.43230041 | +0.1582147 | 459.21978844        | +0.1481925 |
|            | 742.44978837 |            | 770.444703   | 7  | A   | 6  | 802.40535738 | +0.39225   | 802.40535738        |            |
|            | 871.49238147 |            | 899.48729609 | 8  | E   | 5  | 731.36824359 | +0.0868956 | 731.36824359        |            |
|            | 942.52949526 |            | 970.52440988 | 9  | A   | 4  | 602.32565049 | +0.0948207 | 602.32565049        |            |
|            | 1070.5880728 | +0.1491903 | 1098.5829874 | 10 | Q   | 3  | 531.2885367  |            | 531.2885367         |            |
|            | 1183.6721367 | +0.0068988 | 1211.6670514 | 11 | I   | 2  | 403.22995919 | +0.1581634 | 403.22995919        |            |
|            | 1298.6990798 | +0.1022702 | 1326.6939944 | 12 | D   | 1  | 290.14589521 |            | 290.14589521        |            |
|            |              |            |              | 13 | R   | 0  | 175.11895218 |            | 175.11895218        |            |

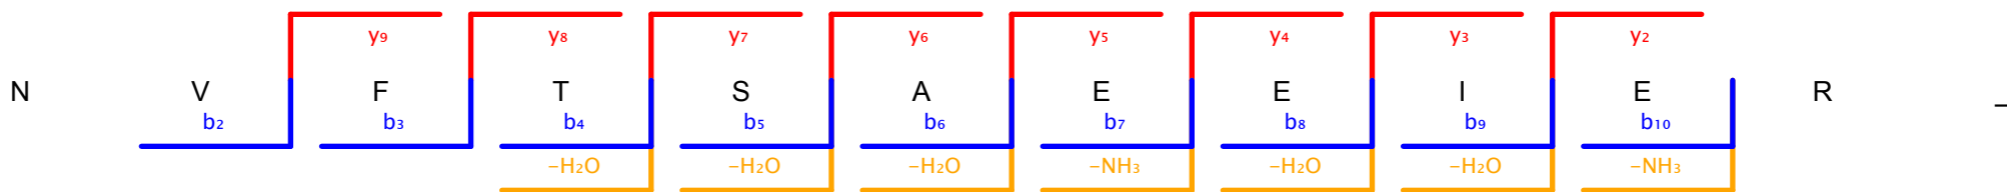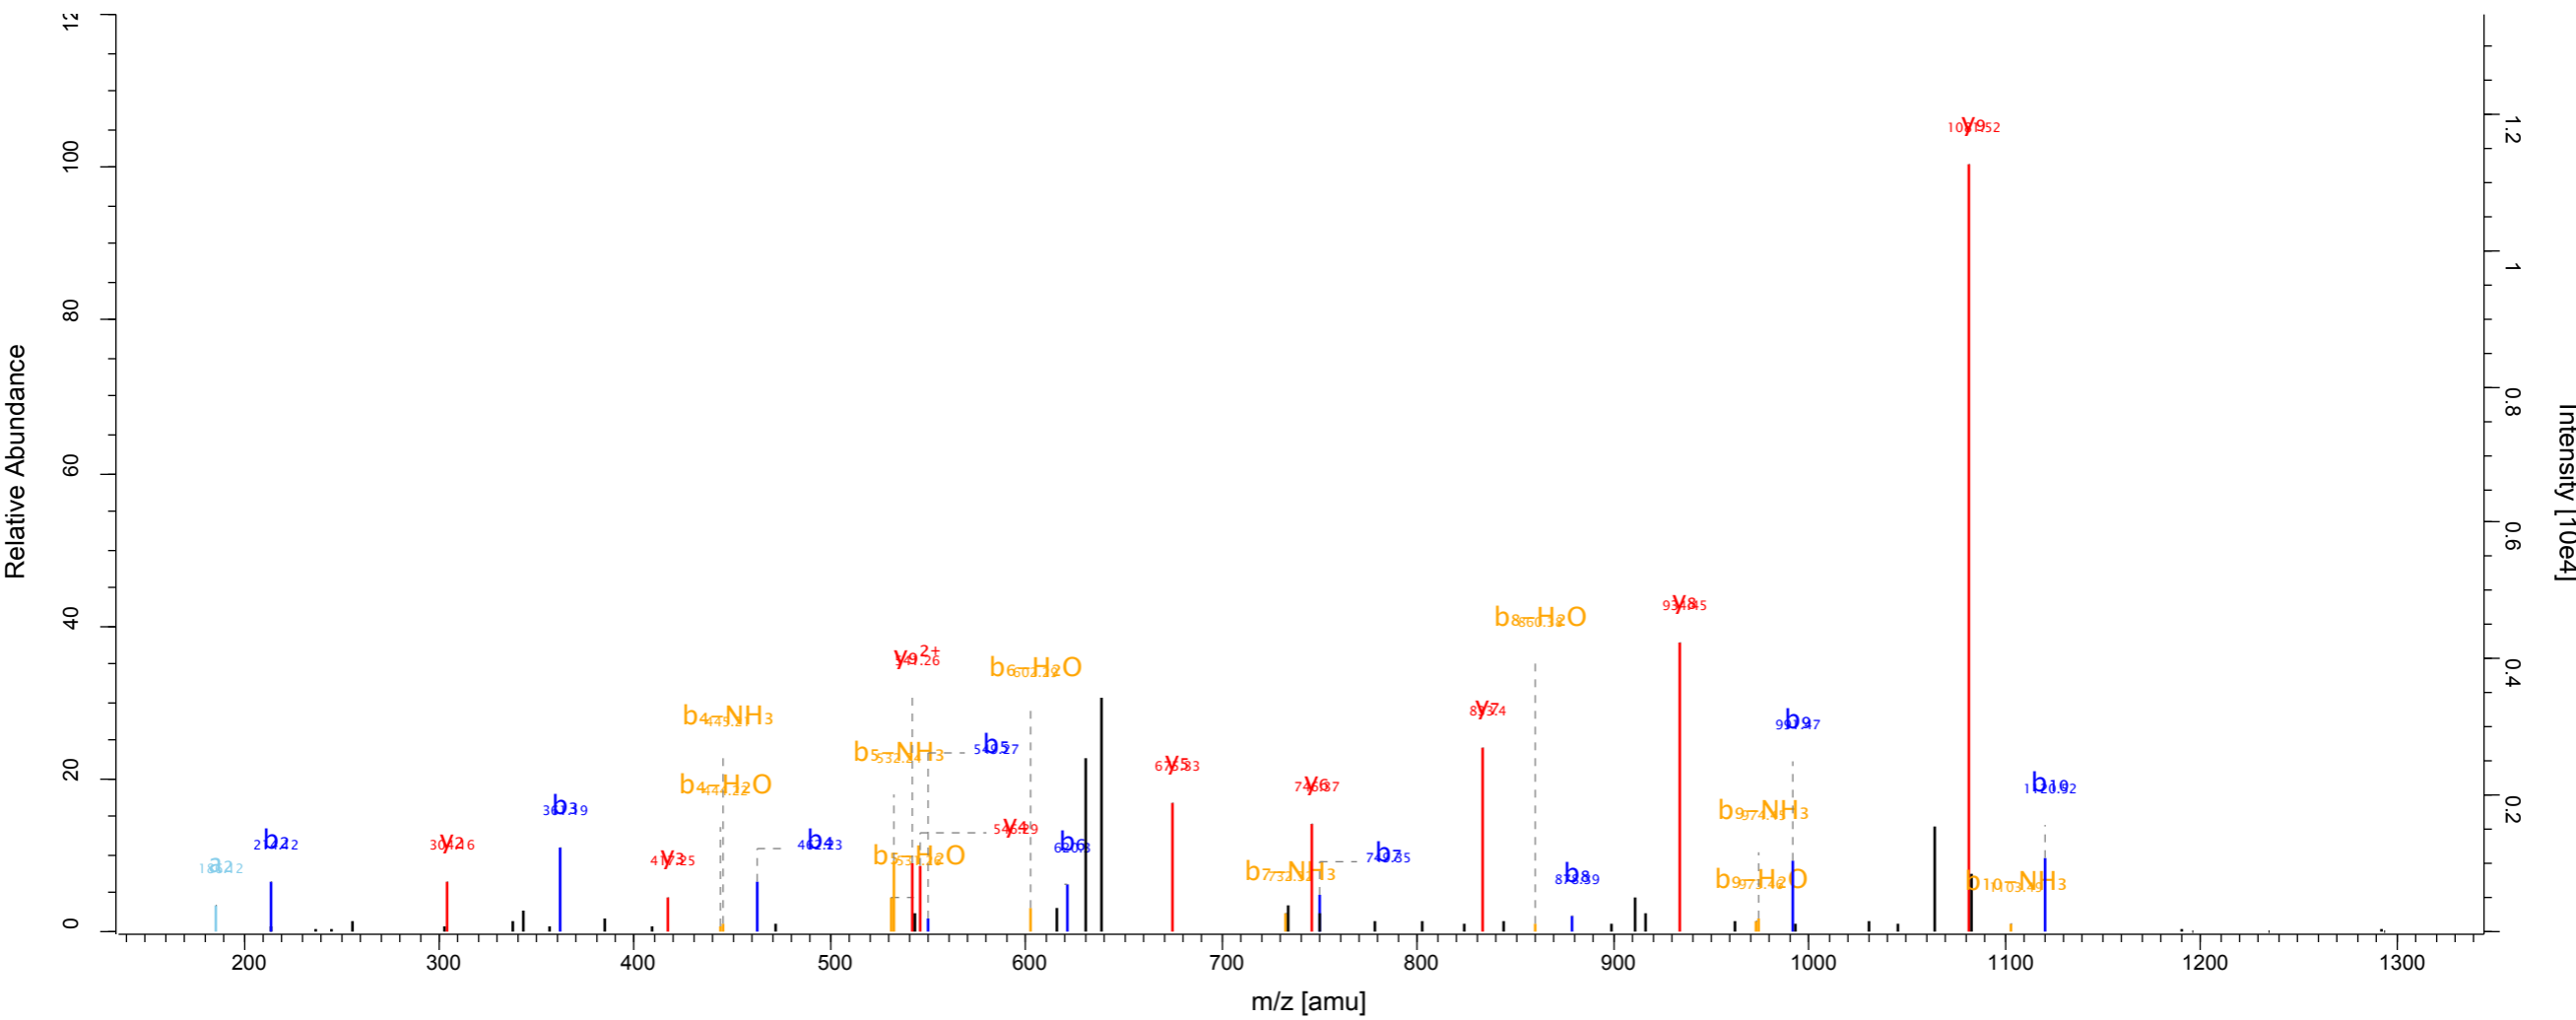

precursor information

|                   |                  |
|-------------------|------------------|
| Mass:             | 1202.62147       |
| m/z:              | 617.81801        |
| Charge:           | 2+               |
| Retention time:   | 60.0148550570212 |
| Score:            | 217.1355         |
| Mass Error (ppm): | 1.0611           |
| PEP:              | 3.3506E-27       |
| Precursor Type:   | MULTI            |

general information

|                       |             |
|-----------------------|-------------|
| Annotation:           | 9 of 11     |
| AminoAcids Coverage:  | 82 %        |
| Intensity Coverage:   | 73 %        |
| Peak Coverage:        | 15 %        |
| Protein Localisation: | 110 ... 120 |

| a ion      |              | b ion      |              |    |     |    | y ion        |            | y <sup>2+</sup> ion |            |
|------------|--------------|------------|--------------|----|-----|----|--------------|------------|---------------------|------------|
| Δ dalton   | mass         | Δ dalton   | mass         |    | seq |    | Δ dalton     | mass       | Δ dalton            | mass       |
|            | 87.055289292 |            | 115.05020391 | 1  | N   | 10 |              |            |                     |            |
| +0.0409544 | 186.12370321 | +0.058674  | 214.11861783 | 2  | V   | 9  | 1180.584444  |            | 1180.584444         |            |
|            | 333.19211712 | +0.0261641 | 361.18703175 | 3  | F   | 8  | 1081.51603   | -0.0270164 | 541.26165325        | +0.0883223 |
|            | 434.2397956  | +0.1466374 | 462.23471022 | 4  | T   | 7  | 934.44761612 | +0.0106358 | 934.44761612        |            |
|            | 521.27182401 | -0.0146024 | 549.26673863 | 5  | S   | 6  | 833.39993765 | +0.0506849 | 833.39993765        |            |
|            | 592.3089378  | +0.037151  | 620.30385242 | 6  | A   | 5  | 746.36790924 | +0.160289  | 746.36790924        |            |
|            | 721.35153089 | -0.0540261 | 749.34644551 | 7  | E   | 4  | 675.33079545 | +0.003372  | 675.33079545        |            |
|            | 850.39412399 | +0.1318964 | 878.38903861 | 8  | E   | 3  | 546.28820235 | +0.1445979 | 546.28820235        |            |
|            | 963.47818797 | -0.0201607 | 991.47310259 | 9  | I   | 2  | 417.24560926 | +0.0953331 | 417.24560926        |            |
|            | 1092.5207811 | -0.0315648 | 1120.5156957 | 10 | E   | 1  | 304.16154528 | -0.0146947 | 304.16154528        |            |
|            |              |            |              | 11 | R   | 0  | 175.11895218 |            | 175.11895218        |            |

Scan number 10318 Raw file 20080623\_Orbi5\_SZ\_Matrigel\_12h\_InGel\_03  
 Method ITMS; CID Genenames ZG16B

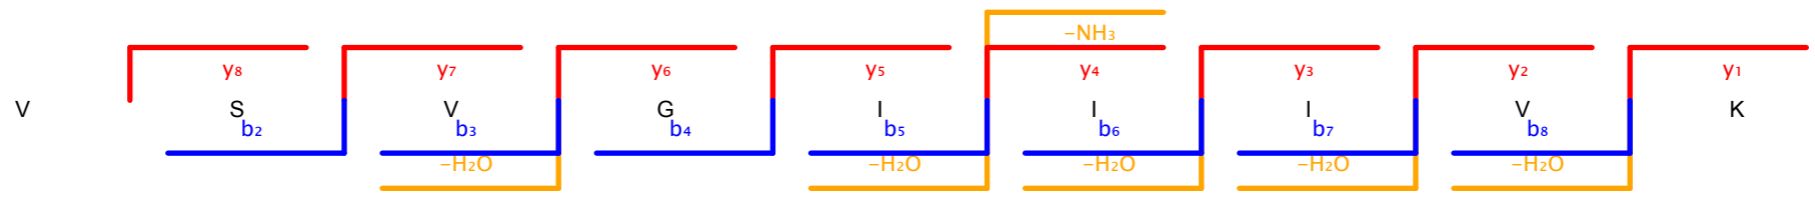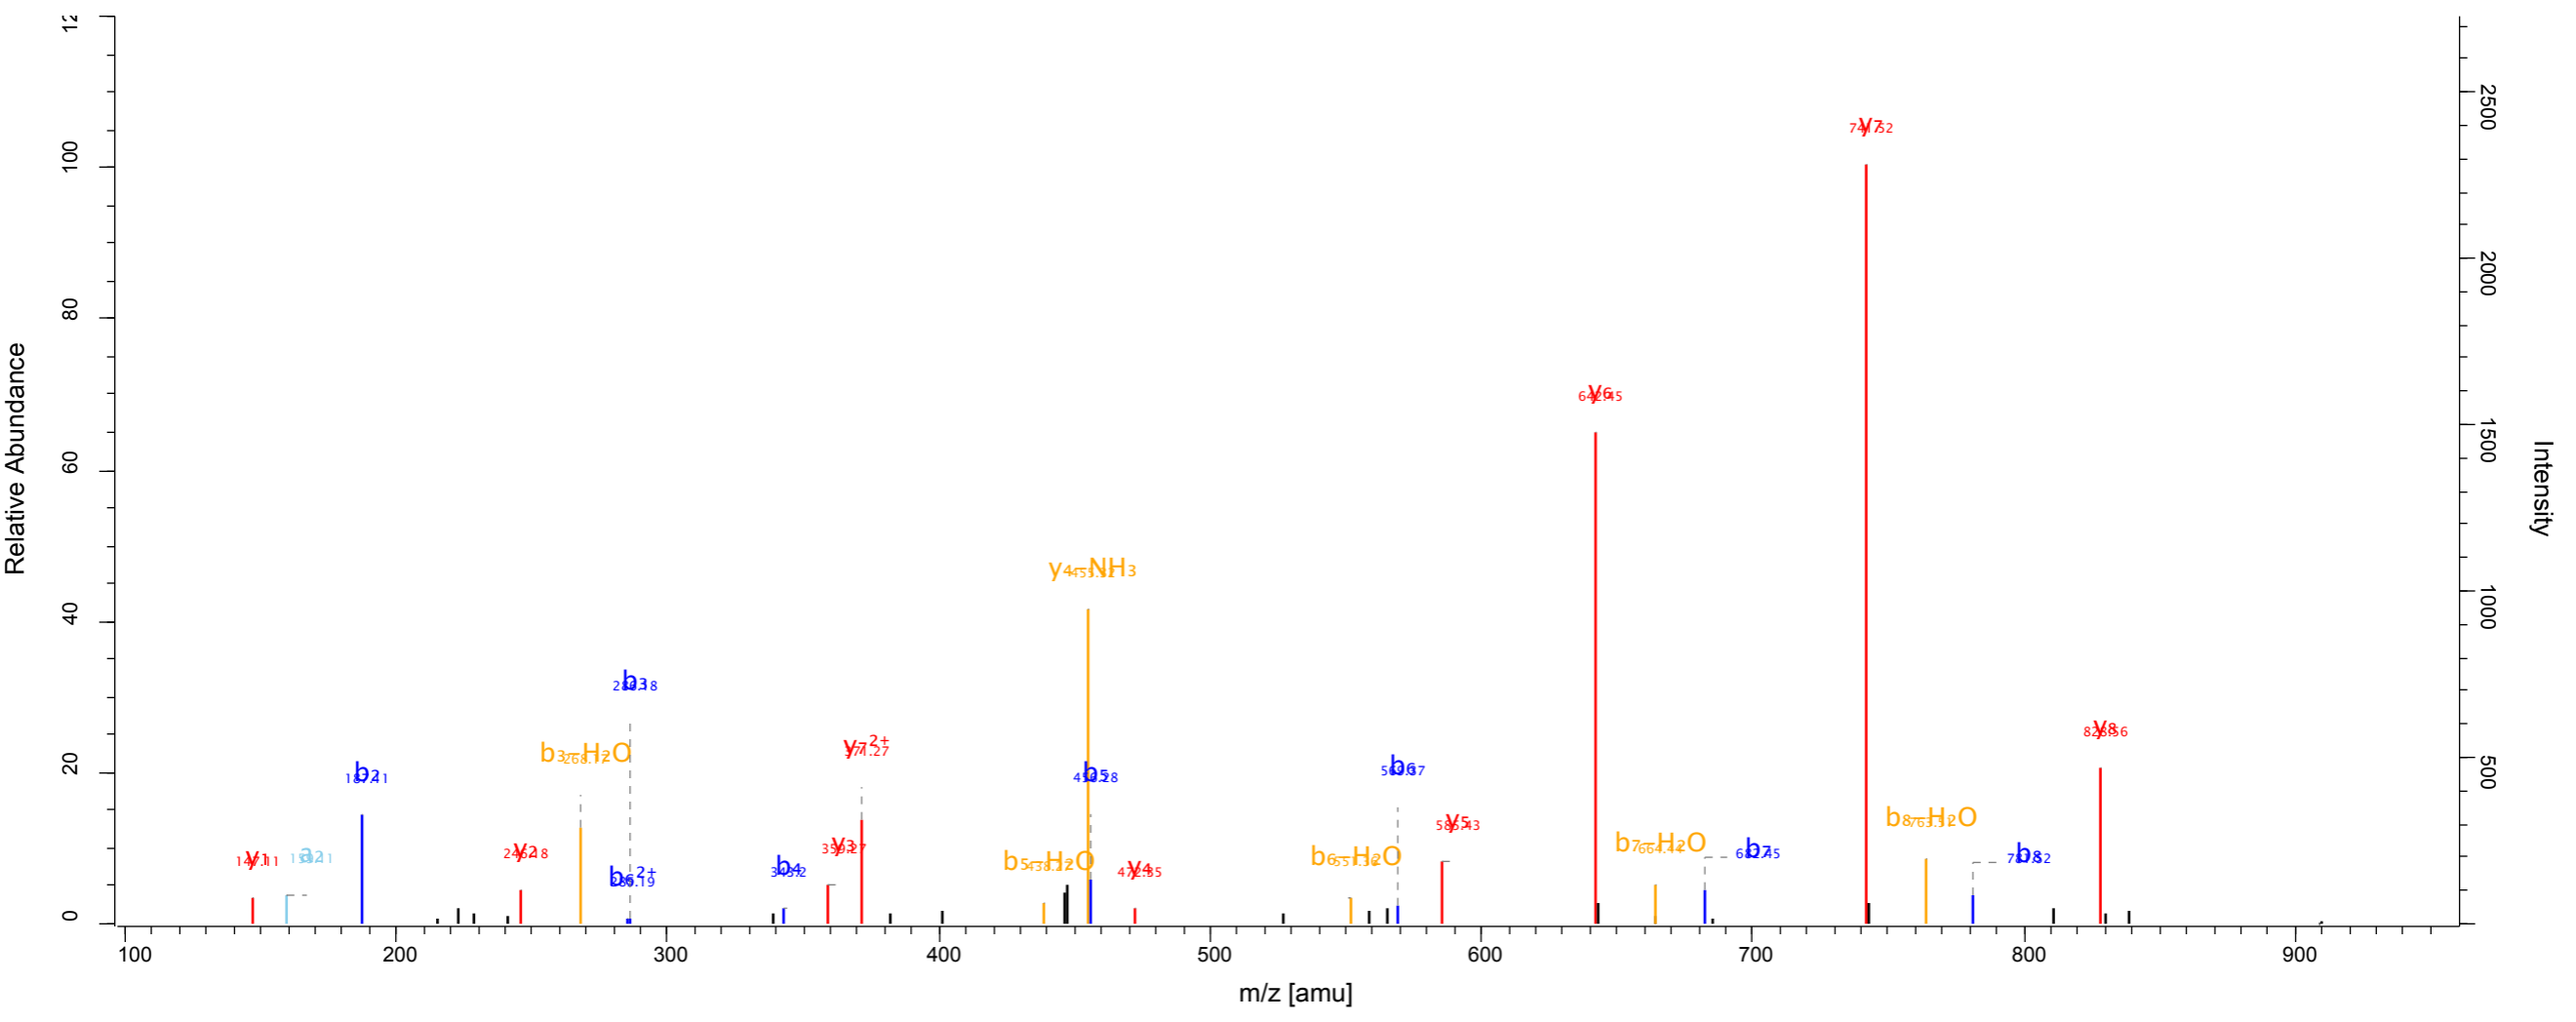

precursor information

|                       |                  |
|-----------------------|------------------|
| Mass:                 | 826.61682        |
| m/z:                  | 164.21560        |
| Charge:               | 2+               |
| Retention time:       | 77.4807815551758 |
| Score:                | 204.3622         |
| Mass Error (ppm):     | 0.20416          |
| gPDP:                 | 1.045E-06        |
| Annotation:           | 8 of 0           |
| AminoAcids Coverage:  | 80 %             |
| Intensity Coverage:   | 90 %             |
| Peak Coverage:        | 52 %             |
| Protein Localisation: | 79 ... 87        |

| a ion      |            | b <sup>2+</sup> ion |            | b ion      |            |   |     |   | y ion      |            | y <sup>2+</sup> ion |            |
|------------|------------|---------------------|------------|------------|------------|---|-----|---|------------|------------|---------------------|------------|
| Δ dalton   | mass       | Δ dalton            | mass       | Δ dalton   | mass       |   | seq |   | Δ dalton   | mass       | Δ dalton            | mass       |
|            | 72.0807758 |                     | 100.07569  |            | 100.07569  | 1 | V   | 8 |            |            |                     |            |
| +0.0074961 | 159.112804 |                     | 187.107719 | -0.0293954 | 187.107719 | 2 | S   | 7 | 828.555316 | +0.0002869 | 828.555316          |            |
|            | 258.181218 |                     | 286.176133 | +0.1105799 | 286.176133 | 3 | V   | 6 | 741.523288 | +0.0636874 | 371.265282          | +0.0260387 |
|            | 315.202682 |                     | 343.197596 | -0.0158948 | 343.197596 | 4 | G   | 5 | 642.454874 | -0.0425202 | 642.454874          |            |
|            | 428.286746 |                     | 456.28166  | -0.0669082 | 456.28166  | 5 | I   | 4 | 585.43341  | +0.0144659 | 585.43341           |            |
|            | 541.37081  | +0.3315965          | 285.1865   | +0.058531  | 569.365724 | 6 | I   | 3 | 472.349346 | +0.1215402 | 472.349346          |            |
|            | 654.454874 |                     | 682.449788 | -0.0287679 | 682.449788 | 7 | I   | 2 | 359.265282 | +0.101112  | 359.265282          |            |
|            | 753.523288 |                     | 781.518202 | +0.150682  | 781.518202 | 8 | V   | 1 | 246.181218 | +0.0085097 | 246.181218          |            |
|            |            |                     |            |            |            | 9 | K   | 0 | 147.112804 | -0.0494955 | 147.112804          |            |

Scan number 15914 Raw file 20080623\_Orbi5\_SZ\_Matrigel\_12h\_InGel\_05  
 Method ITMS; CID Genenames ASB9

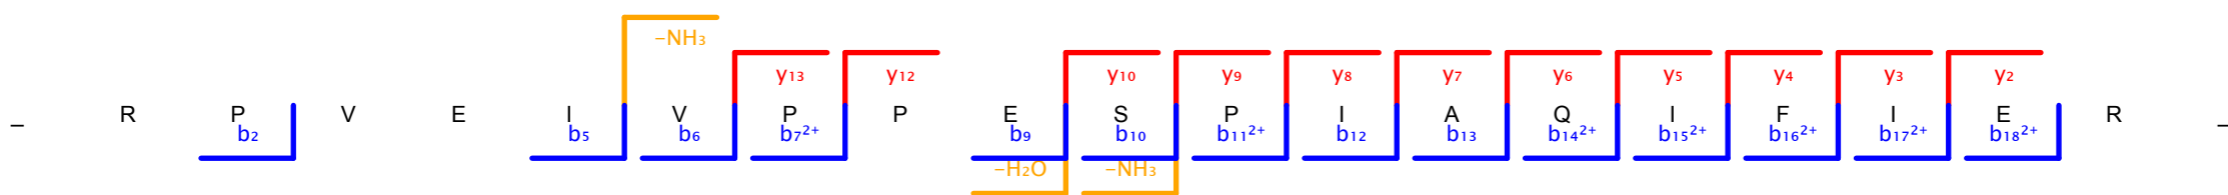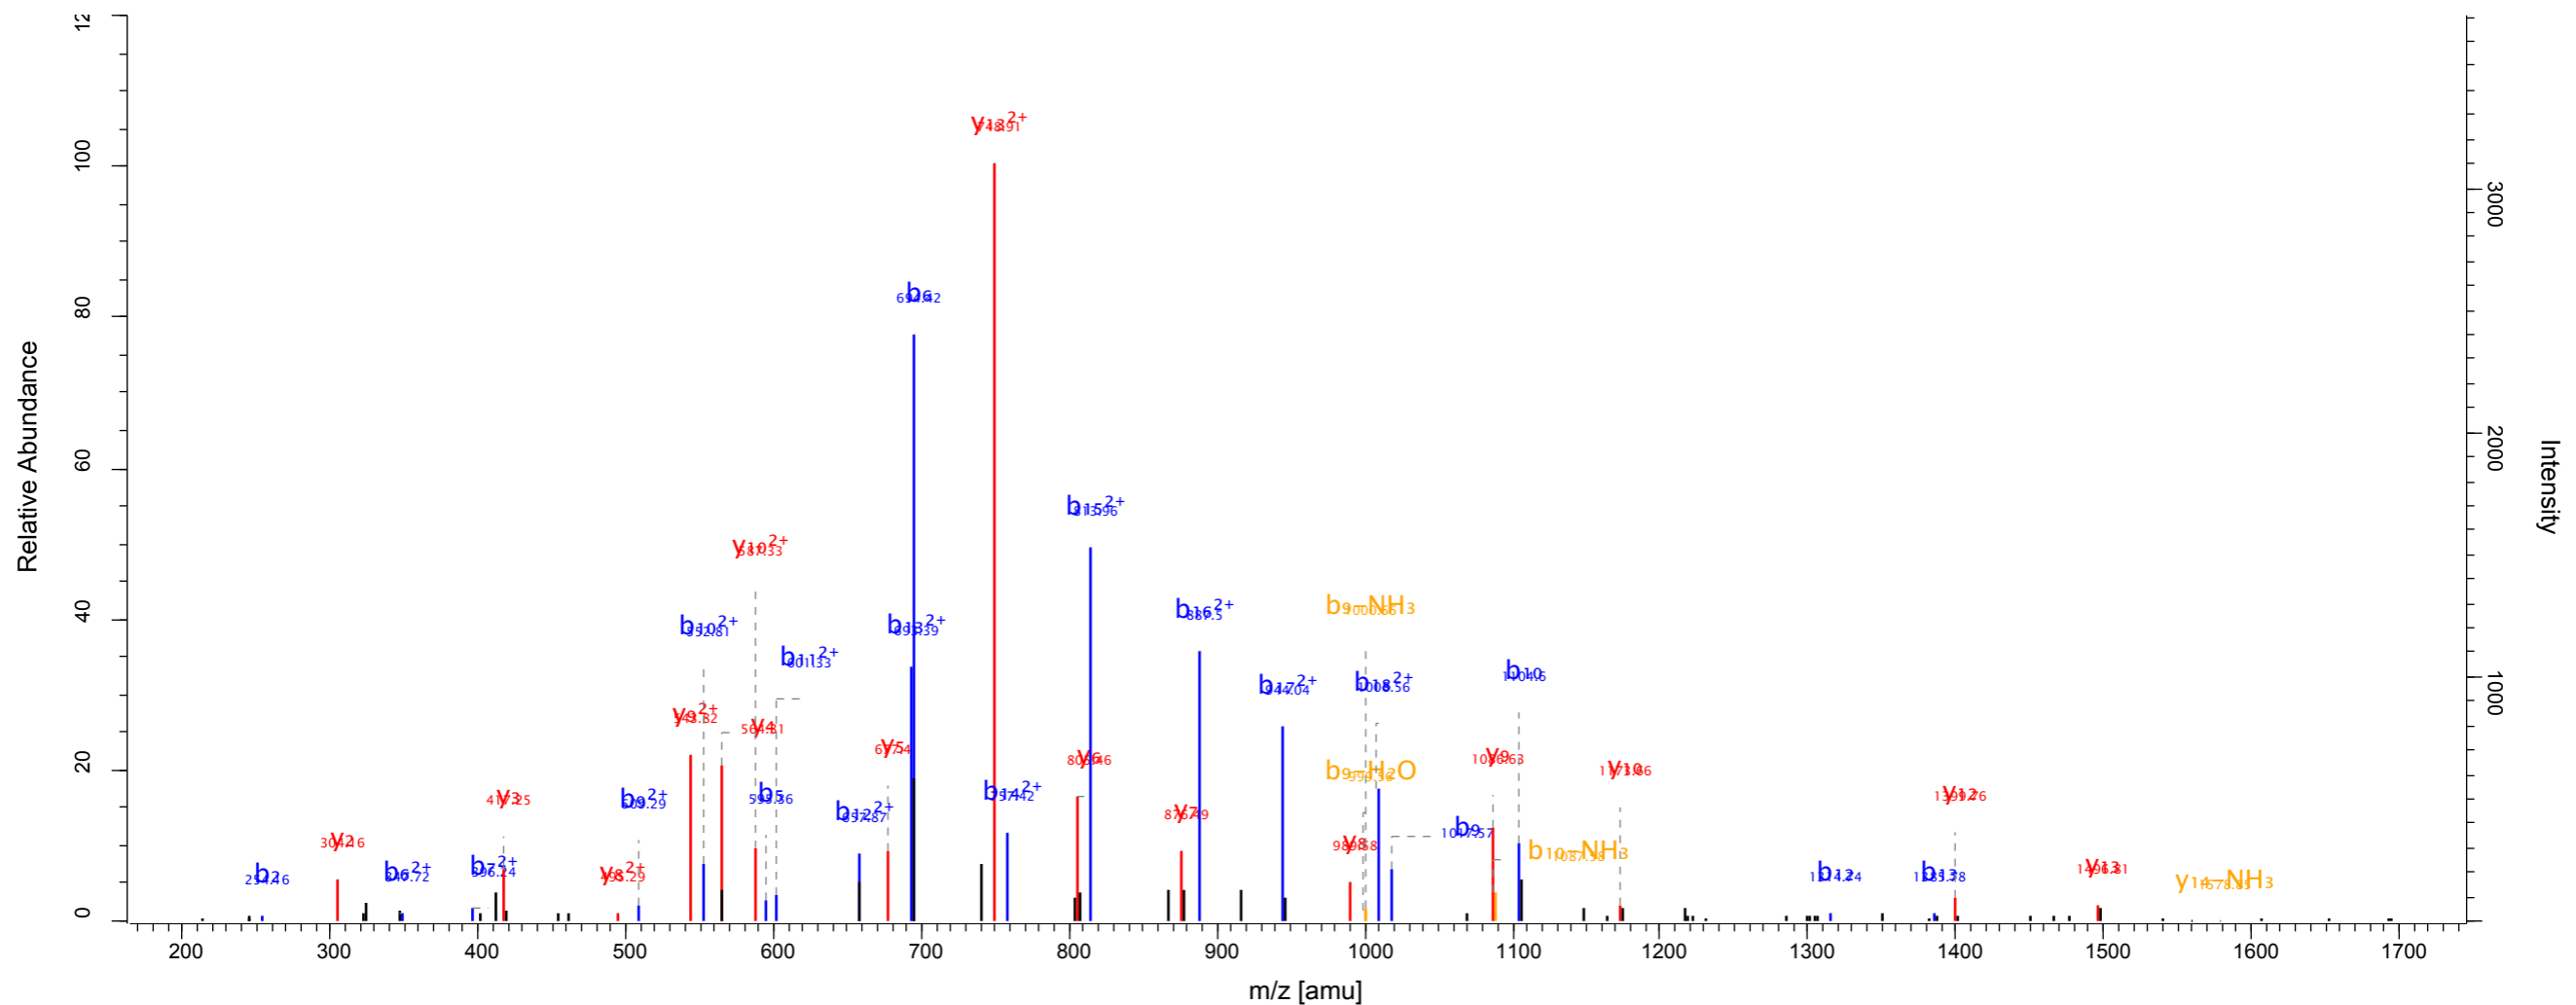

precursor information

|                   |                  |
|-------------------|------------------|
| Mass:             | 2180.22114       |
| m/z:              | 720.74766        |
| Charge:           | 2+               |
| RetentionTime:    | 112.612100246582 |
| Score:            | 225.8828         |
| Mass Error (ppm): | 0.128            |
| PEP:              | 5.0400E-02       |
| Precursor Type:   | MULTI            |

general information

|                       |             |
|-----------------------|-------------|
| Annotation:           | 15 of 19    |
| AminoAcids Coverage:  | 70%         |
| Intensity Coverage:   | 84%         |
| Peak Coverage:        | 44%         |
| Protein Localisation: | 234 ... 252 |

| b <sup>2+</sup> ion |              | b ion      |              |    |     |    | y ion        |            | y <sup>2+</sup> ion |            |
|---------------------|--------------|------------|--------------|----|-----|----|--------------|------------|---------------------|------------|
| Δ dalton            | mass         | Δ dalton   | mass         |    | seq |    | Δ dalton     | mass       | Δ dalton            | mass       |
|                     | 157.10838749 |            | 157.10838749 | 1  | R   | 18 |              |            |                     |            |
|                     | 254.16115135 | +0.0913206 | 254.16115135 | 2  | P   | 17 | 2034.1270043 |            | 2034.1270043        |            |
|                     | 353.22956526 |            | 353.22956526 | 3  | V   | 16 | 1937.0742404 |            | 1937.0742404        |            |
|                     | 482.27215836 |            | 482.27215836 | 4  | E   | 15 | 1838.0058265 |            | 1838.0058265        |            |
|                     | 595.35622234 | +0.0058992 | 595.35622234 | 5  | I   | 14 | 1708.9632334 |            | 1708.9632334        |            |
| +0.185716           | 347.71595636 | +0.0511328 | 694.42463626 | 6  | V   | 13 | 1595.8791694 |            | 1595.8791694        |            |
| +0.2110919          | 396.24233829 |            | 791.47740011 | 7  | P   | 12 | 1496.8107555 | +0.0004017 | 748.90901598        | +0.2094533 |
|                     | 888.53016396 |            | 888.53016396 | 8  | P   | 11 | 1399.7579916 | +0.0149576 | 1399.7579916        |            |
| +0.0490335          | 509.29001676 | +0.0430266 | 1017.5727571 | 9  | E   | 10 | 1302.7052278 |            | 1302.7052278        |            |
| +0.115783           | 552.80603097 | -0.001514  | 1104.6047855 | 10 | S   | 9  | 1173.6626347 | +0.0741817 | 587.33495558        | +0.1499687 |
| +0.0777434          | 601.33241289 |            | 1201.6575493 | 11 | P   | 8  | 1086.6306063 | +0.0186857 | 543.81894138        | +0.2270181 |
| +0.0305234          | 657.87444488 | +0.2724248 | 1314.7416133 | 12 | I   | 7  | 989.57784243 | +0.0960467 | 495.29255945        | +0.010236  |
| +0.1909826          | 693.39300178 | -0.0577798 | 1385.7787271 | 13 | A   | 6  | 876.49377845 | -0.0163004 | 876.49377845        |            |
| +0.2836421          | 757.42229053 |            | 1513.8373046 | 14 | Q   | 5  | 805.45666467 | +0.0869755 | 805.45666467        |            |
| +0.2410608          | 813.96432252 |            | 1626.9213686 | 15 | I   | 4  | 677.39808715 | +0.1449426 | 677.39808715        |            |
| +0.1803646          | 887.49852948 |            | 1773.9897825 | 16 | F   | 3  | 564.31402317 | +0.0208767 | 564.31402317        |            |
| +0.1952173          | 944.04056147 |            | 1887.0738465 | 17 | I   | 2  | 417.24560926 | +0.1091881 | 417.24560926        |            |
| +0.1468212          | 1008.561858  |            | 2016.1164396 | 18 | E   | 1  | 304.16154528 | +0.1209254 | 304.16154528        |            |
|                     |              |            |              | 19 | R   | 0  | 175.11895218 |            | 175.11895218        |            |

Scan number 15368 Raw file 20080623\_Orbi5\_SZ\_Matrigel\_12h\_InGel\_09  
 Method ITMS; CID Genenames NFYA

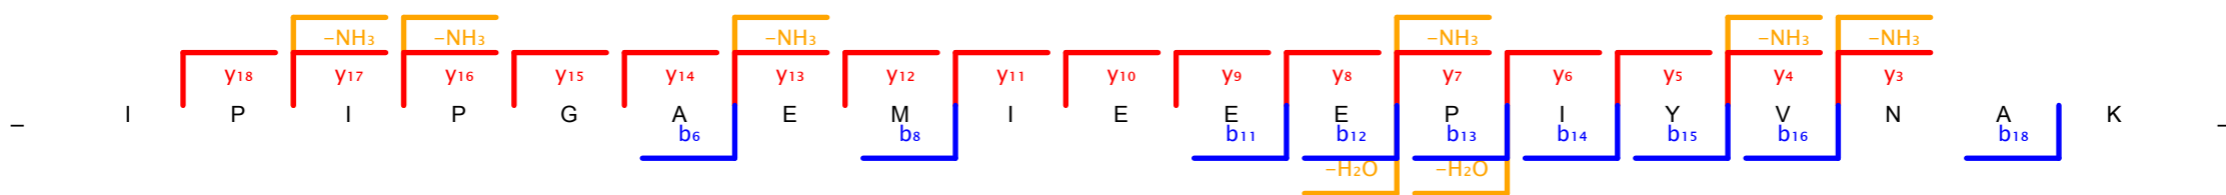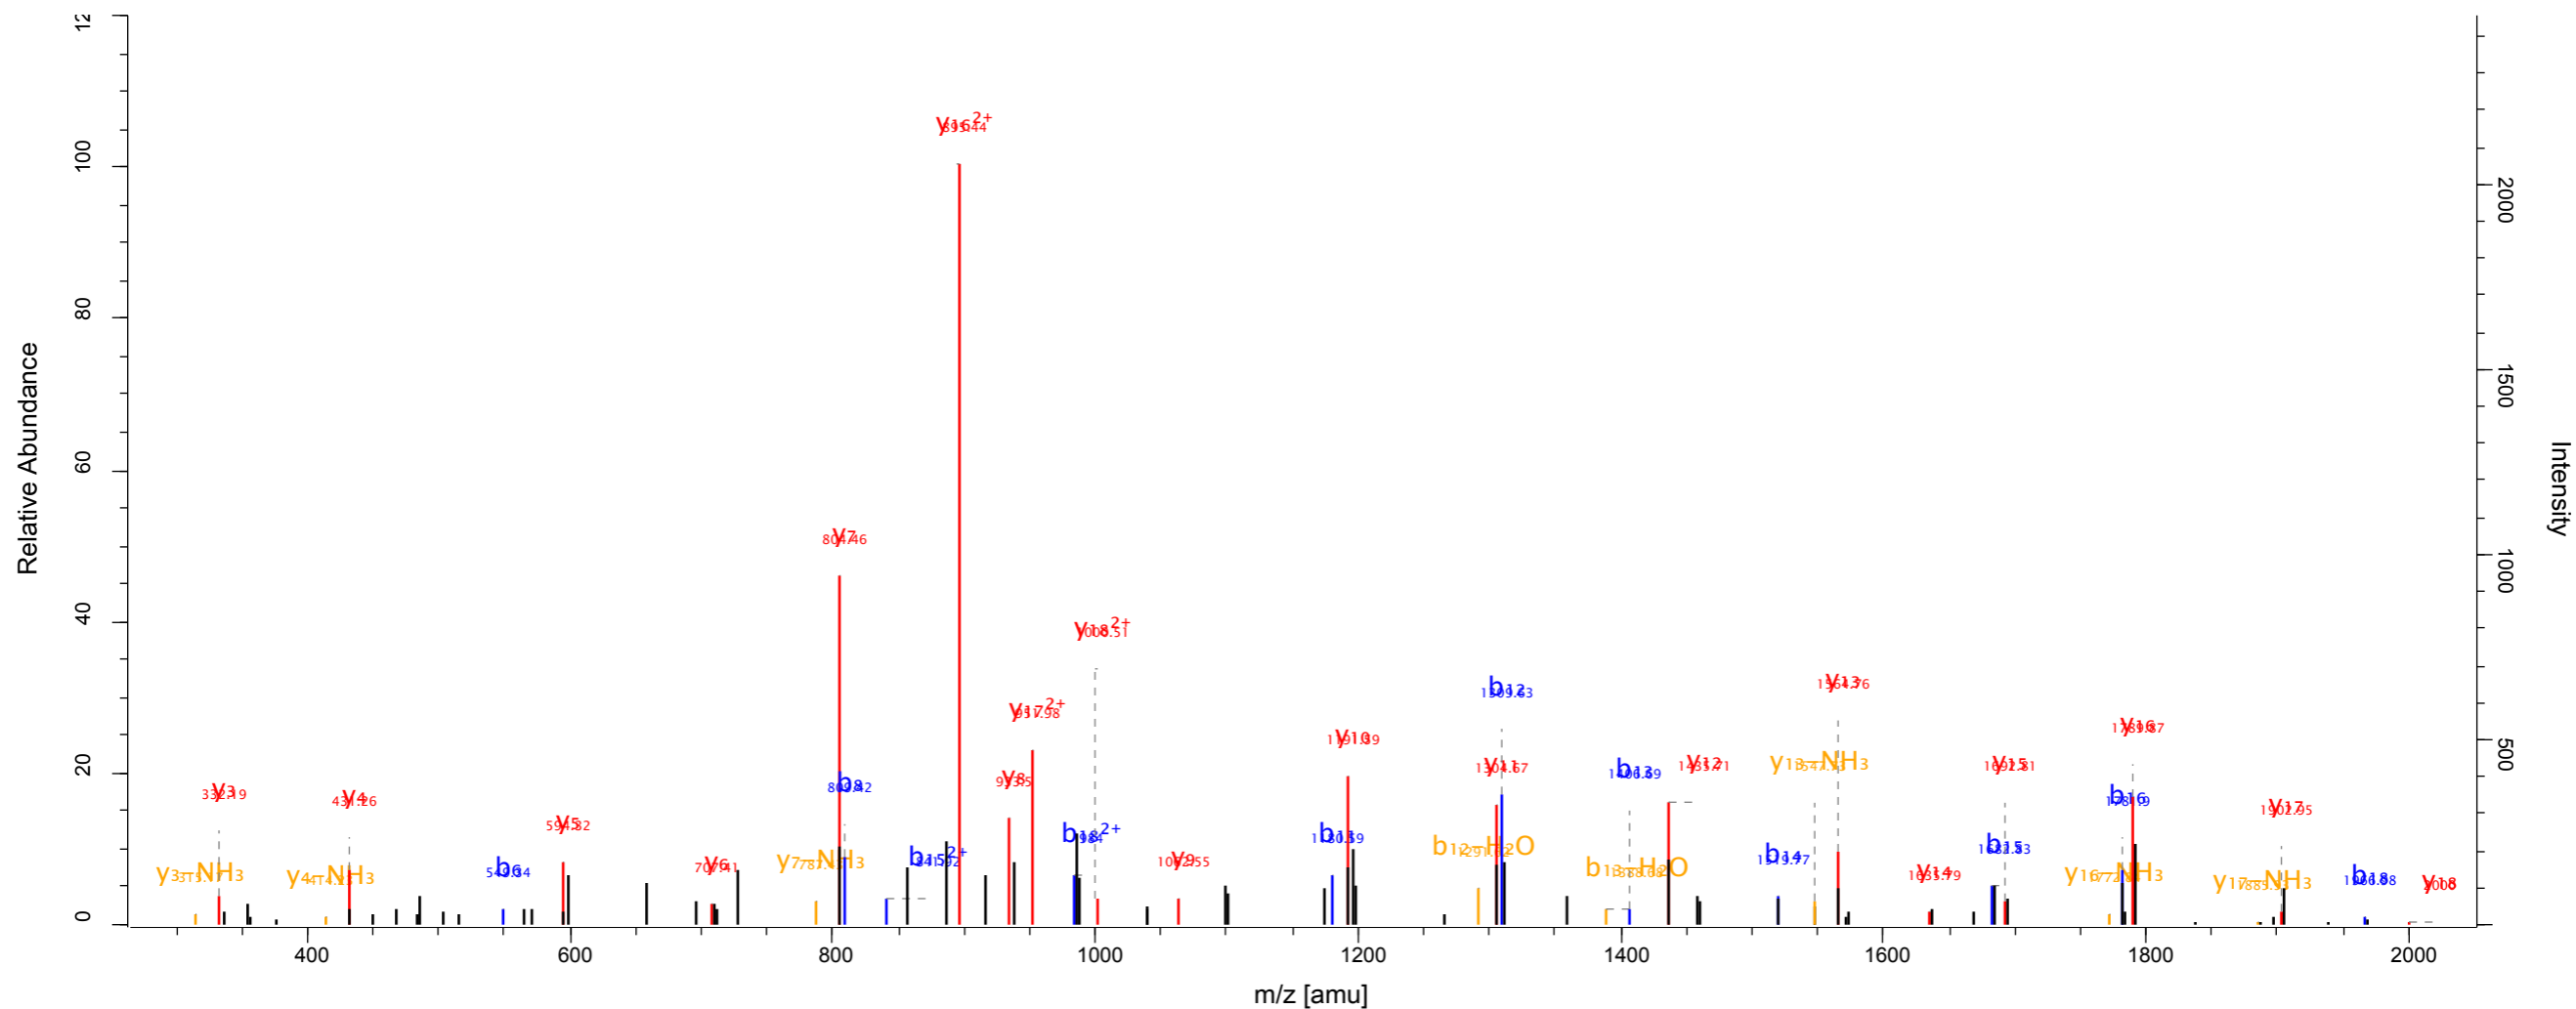

precursor information

|                   |                  |
|-------------------|------------------|
| Mass:             | 2112.082         |
| m/z:              | 1057.04828       |
| Charge:           | 2+               |
| RetentionTime:    | 104.025042077637 |
| Score:            | 222.7705         |
| Mass Error (ppm): | 0.22507          |
| DEP:              | 1.66115_81       |
| Precursor Type:   | MULTI            |

general information

|                       |             |
|-----------------------|-------------|
| Annotation:           | 17 of 19    |
| AminoAcids Coverage:  | 80%         |
| Intensity Coverage:   | 61%         |
| Peak Coverage:        | 20%         |
| Protein Localisation: | 252 ... 270 |

| b <sup>2+</sup> ion |              | b ion      |              |    |     |    | y ion        |            | y <sup>2+</sup> ion |            |
|---------------------|--------------|------------|--------------|----|-----|----|--------------|------------|---------------------|------------|
| Δ dalton            | mass         | Δ dalton   | mass         |    | seq |    | Δ dalton     | mass       | Δ dalton            | mass       |
|                     | 114.09134045 |            | 114.09134045 | 1  | I   | 18 |              |            |                     |            |
|                     | 211.1441043  |            | 211.1441043  | 2  | P   | 17 | 2000.0045059 | -0.0980117 | 1000.5058912        | +0.3682543 |
|                     | 324.22816828 |            | 324.22816828 | 3  | I   | 16 | 1902.951742  | -0.1477869 | 951.97950924        | +0.264021  |
|                     | 421.28093213 |            | 421.28093213 | 4  | P   | 15 | 1789.867678  | -0.029055  | 895.43747725        | +0.2402571 |
|                     | 478.30239586 |            | 478.30239586 | 5  | G   | 14 | 1692.8149142 | -0.0254855 | 1692.8149142        |            |
|                     | 549.33950964 | -0.02408   | 549.33950964 | 6  | A   | 13 | 1635.7934505 | -0.0858089 | 1635.7934505        |            |
|                     | 678.38210274 |            | 678.38210274 | 7  | E   | 12 | 1564.7563367 | +0.0147815 | 1564.7563367        |            |
|                     | 809.42258735 | -0.0003461 | 809.42258735 | 8  | M   | 11 | 1435.7137436 | +0.0759293 | 1435.7137436        |            |
|                     | 922.50665133 |            | 922.50665133 | 9  | I   | 10 | 1304.673259  | -0.0343429 | 1304.673259         |            |
|                     | 1051.5492444 |            | 1051.5492444 | 10 | E   | 9  | 1191.589195  | +0.032265  | 1191.589195         |            |
|                     | 1180.5918375 | -0.0445963 | 1180.5918375 | 11 | E   | 8  | 1062.5466019 | +0.172026  | 1062.5466019        |            |
|                     | 1309.6344306 | -0.0340888 | 1309.6344306 | 12 | E   | 7  | 933.50400879 | +0.0363965 | 933.50400879        |            |
|                     | 1406.6871945 | +0.2207645 | 1406.6871945 | 13 | P   | 6  | 804.46141569 | +0.0351663 | 804.46141569        |            |
|                     | 1519.7712584 | +0.0163392 | 1519.7712584 | 14 | I   | 5  | 707.40865184 | +0.0802398 | 707.40865184        |            |
| -0.3981046          | 841.92093173 | +0.0006181 | 1682.834587  | 15 | Y   | 4  | 594.32458786 | +0.0582246 | 594.32458786        |            |
|                     | 1781.9030009 | -0.0178691 | 1781.9030009 | 16 | V   | 3  | 431.26125932 | +0.0143144 | 431.26125932        |            |
|                     | 1895.9459283 |            | 1895.9459283 | 17 | N   | 2  | 332.19284541 | +0.085597  | 332.19284541        |            |
| +0.3531073          | 983.9951593  | +0.1397606 | 1966.9830421 | 18 | A   | 1  | 218.14991796 |            | 218.14991796        |            |
|                     |              |            |              | 19 | K   | 0  | 147.11280417 |            | 147.11280417        |            |

Scan number 15797 Raw file 20080623\_Orbi5\_SZ\_Matrigel\_12h\_InGel\_10  
 Method ITMS; CID Genenames CHKA

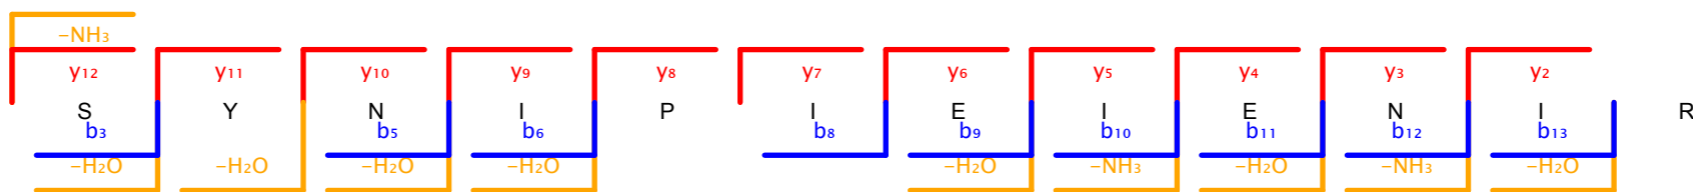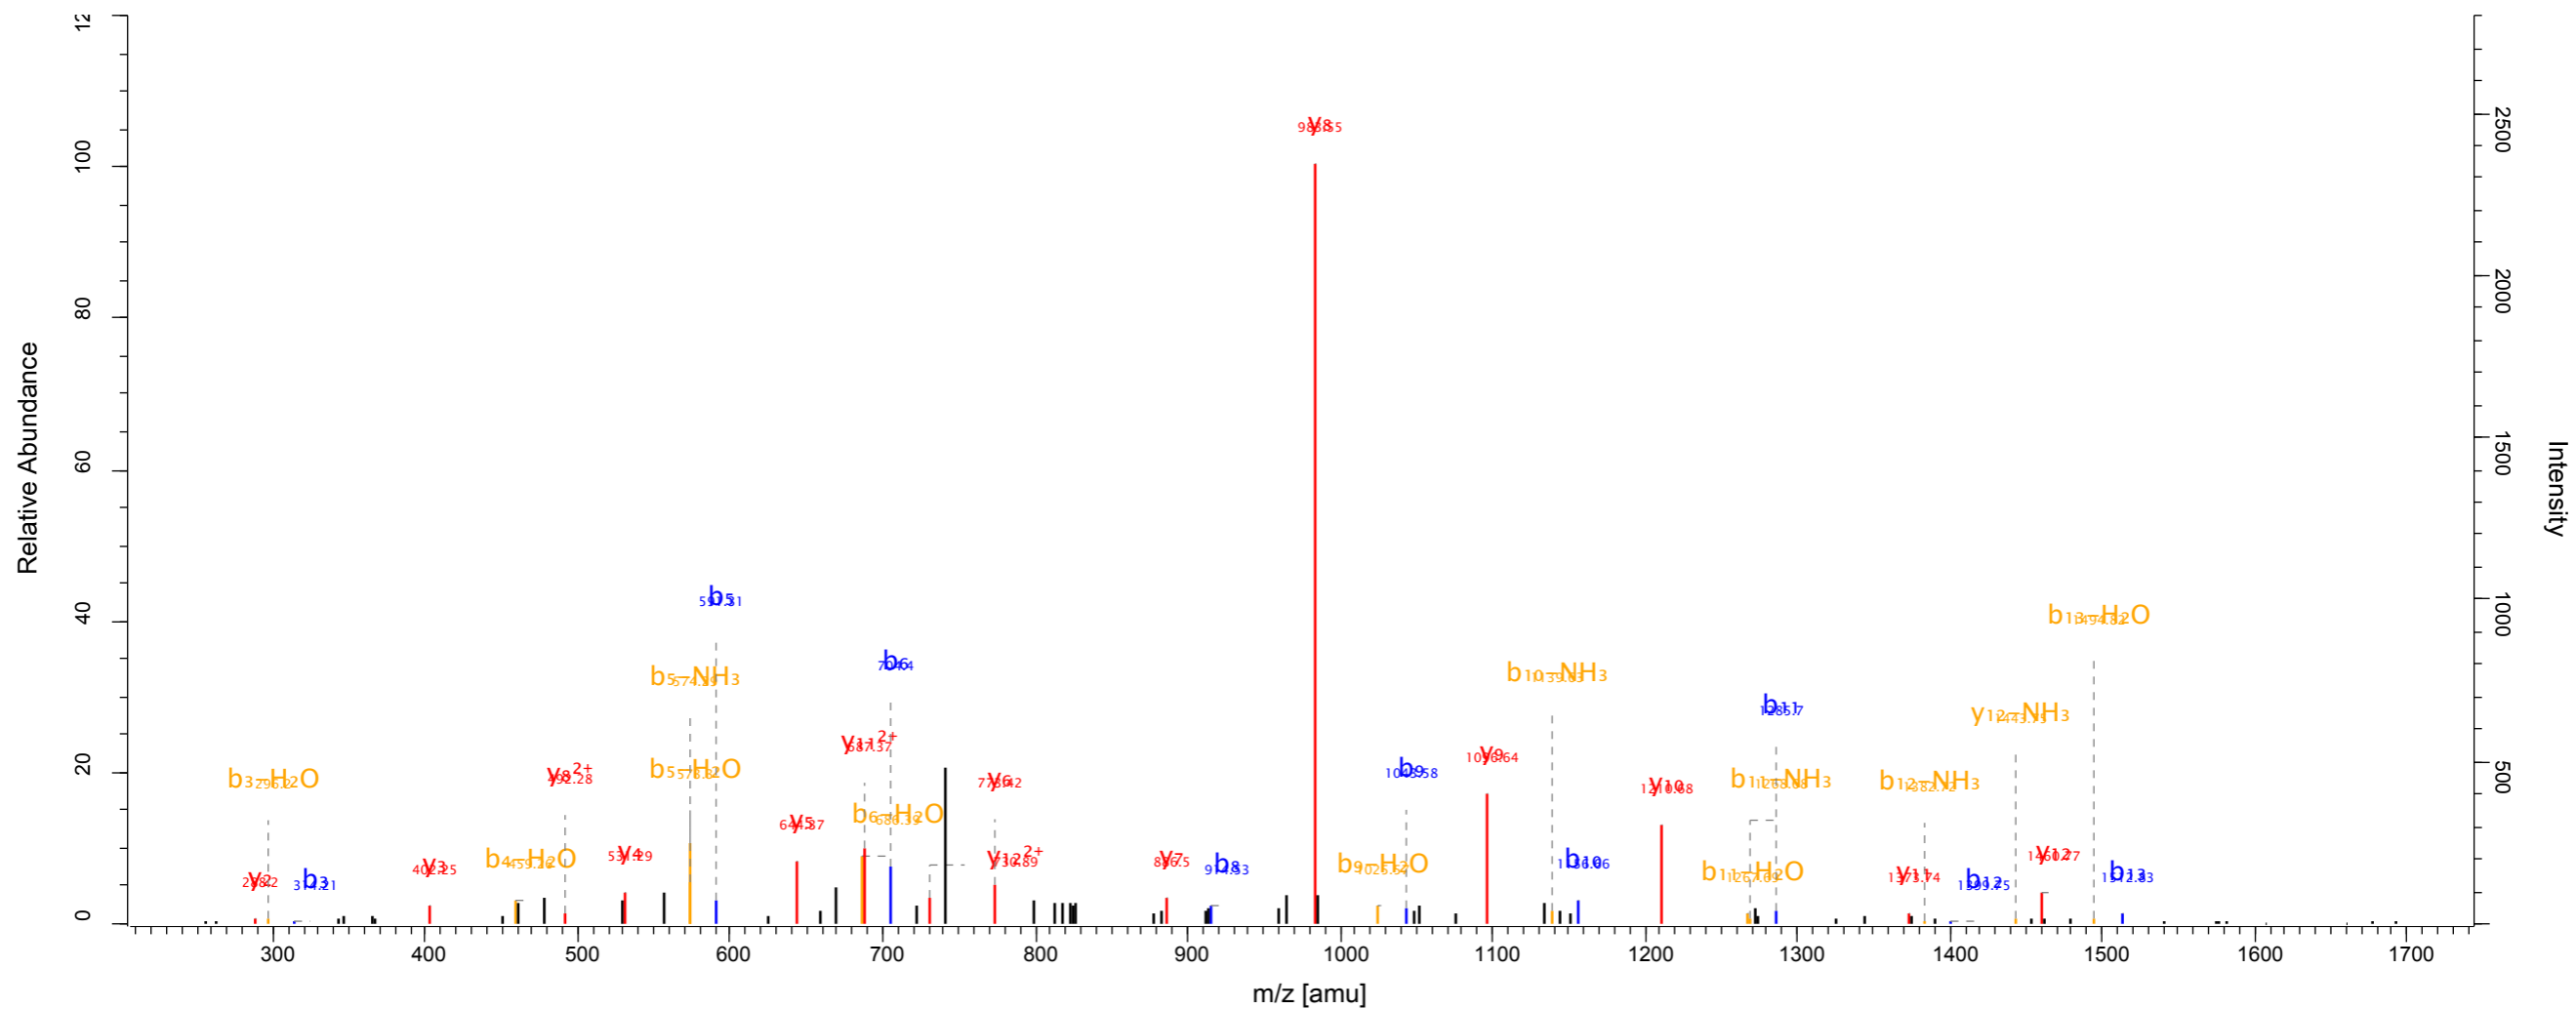

precursor information

|                   |                   |
|-------------------|-------------------|
| Mass:             | 1685.02622        |
| m/z:              | 812.07544         |
| Charge:           | 2+                |
| Potentiation:     | 1.07.007760620117 |
| Score:            | 224.4217          |
| Mass Error [ppm]: | 0.65266           |
| PEP:              | 2.56125e-27       |
| Precursor Type:   | MULTI             |

general information

|                       |             |
|-----------------------|-------------|
| Annotation:           | 11 of 14    |
| AminoAcids Coverage:  | 70%         |
| Intensity Coverage:   | 60%         |
| Peak Coverage:        | 40%         |
| Protein Localisation: | 277 ... 290 |

| b ion      |                |    |     |    | y ion          |            | y <sup>2+</sup> ion |            |
|------------|----------------|----|-----|----|----------------|------------|---------------------|------------|
| Δ dalton   | mass           |    | seq |    | Δ dalton       | mass       | Δ dalton            | mass       |
|            | 114.091340447  | 1  | I   | 13 |                |            |                     |            |
|            | 227.175404427  | 2  | I   | 12 | 1573.85843397  |            | 1573.85843397       |            |
| +0.0258435 | 314.207432837  | 3  | S   | 11 | 1460.77436999  | -0.0423143 | 730.890823228       | +0.0898286 |
|            | 477.270761376  | 4  | Y   | 10 | 1373.74234158  | -0.1335769 | 687.374809023       | +0.0654376 |
| +0.0238966 | 591.313688823  | 5  | N   | 9  | 1210.679013041 | -0.0181244 | 1210.679013041      |            |
| +0.0633068 | 704.397752803  | 6  | I   | 8  | 1096.636085594 | +0.0683822 | 1096.636085594      |            |
|            | 801.450516655  | 7  | P   | 7  | 983.552021614  | +0.0160936 | 492.27964904        | +0.0248554 |
| -0.0658306 | 914.534580636  | 8  | I   | 6  | 886.499257762  | -0.1816918 | 886.499257762       |            |
| -0.1238046 | 1043.577173732 | 9  | E   | 5  | 773.415193781  | -0.0036948 | 773.415193781       |            |
| -0.1487865 | 1156.661237712 | 10 | I   | 4  | 644.372600685  | +0.0813178 | 644.372600685       |            |
| -0.0400124 | 1285.703830808 | 11 | E   | 3  | 531.288536705  | +0.0774911 | 531.288536705       |            |
| +0.0492623 | 1399.746758256 | 12 | N   | 2  | 402.245943609  | +0.1607947 | 402.245943609       |            |
| -0.0523799 | 1512.830822236 | 13 | I   | 1  | 288.203016161  | -0.0042857 | 288.203016161       |            |
|            |                | 14 | R   | 0  | 175.118952181  |            | 175.118952181       |            |

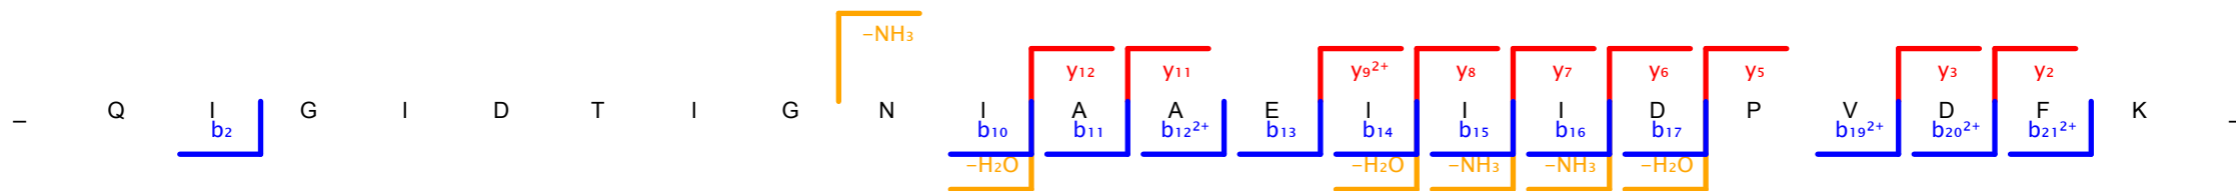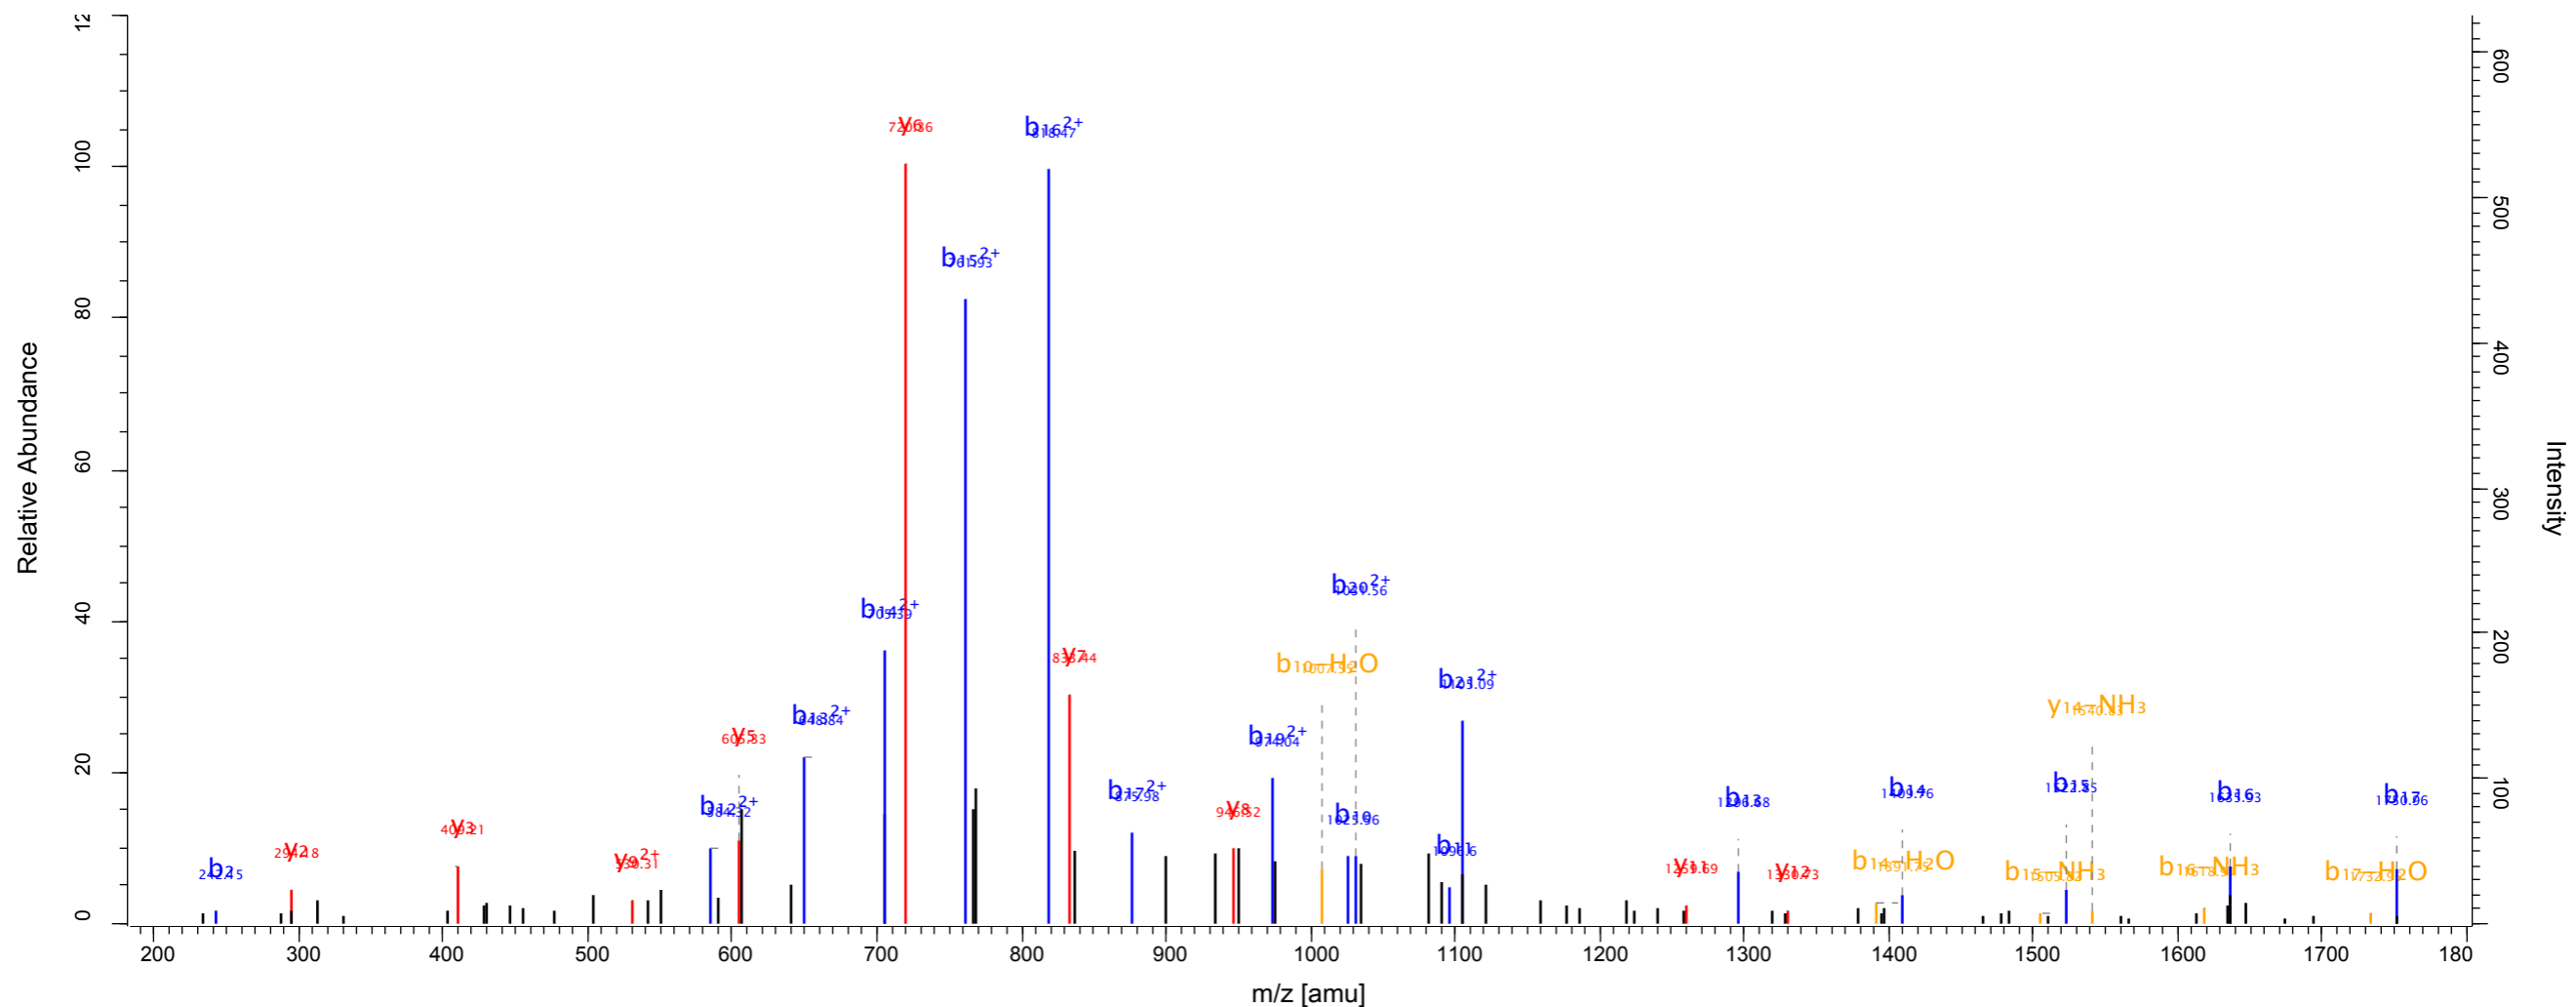

precursor information

|                   |                  |
|-------------------|------------------|
| Mass:             | 2254.27211       |
| m/z:              | 785.76465        |
| Charge:           | 3+               |
| Potentialtime:    | 1.25405151267188 |
| Score:            | 1.704052         |
| Mass Error (ppm): | 0.51527          |
| DEP:              | 6.042522         |
| Precursor Type:   | MULTI            |

| b <sup>2+</sup> ion |              | b ion      |              |    |     |    | y ion        |            | y <sup>2+</sup> ion |            |
|---------------------|--------------|------------|--------------|----|-----|----|--------------|------------|---------------------|------------|
| Δ dalton            | mass         | Δ dalton   | mass         |    | seq |    | Δ dalton     | mass       | Δ dalton            | mass       |
|                     | 129.06585398 |            | 129.06585398 | 1  | Q   | 21 |              |            |                     |            |
|                     | 242.14991796 | +0.0659481 | 242.14991796 | 2  | I   | 20 | 2227.2220269 |            | 2227.2220269        |            |
|                     | 299.17138168 |            | 299.17138168 | 3  | G   | 19 | 2114.1379629 |            | 2114.1379629        |            |
|                     | 412.25544566 |            | 412.25544566 | 4  | I   | 18 | 2057.1164992 |            | 2057.1164992        |            |
|                     | 527.28238869 |            | 527.28238869 | 5  | D   | 17 | 1944.0324352 |            | 1944.0324352        |            |
|                     | 628.33006717 |            | 628.33006717 | 6  | T   | 16 | 1829.0054921 |            | 1829.0054921        |            |
|                     | 741.41413115 |            | 741.41413115 | 7  | I   | 15 | 1727.9578137 |            | 1727.9578137        |            |
|                     | 798.43559487 |            | 798.43559487 | 8  | G   | 14 | 1614.8737497 |            | 1614.8737497        |            |
|                     | 912.47852232 |            | 912.47852232 | 9  | N   | 13 | 1557.852286  |            | 1557.852286         |            |
|                     | 1025.5625863 | -0.1331429 | 1025.5625863 | 10 | I   | 12 | 1443.8093585 |            | 1443.8093585        |            |
|                     | 1096.5997001 | -0.0999442 | 1096.5997001 | 11 | A   | 11 | 1330.7252945 | +0.1300521 | 1330.7252945        |            |
| +0.0799934          | 584.32204517 |            | 1167.6368139 | 12 | A   | 10 | 1259.6881807 | +0.1909696 | 1259.6881807        |            |
| +0.0856134          | 648.84334172 | +0.0675413 | 1296.679407  | 13 | E   | 9  | 1188.651067  |            | 1188.651067         |            |
| +0.1248192          | 705.38537371 | -0.1320012 | 1409.763471  | 14 | I   | 8  | 1059.6084739 |            | 530.30787516        | +0.1774764 |
| +0.099877           | 761.9274057  | -0.2128914 | 1522.8475349 | 15 | I   | 7  | 946.52440988 | +0.2244305 | 946.52440988        |            |
| +0.141097           | 818.46943769 | +0.0447194 | 1635.9315989 | 16 | I   | 6  | 833.4403459  | -0.0086442 | 833.4403459         |            |
| +0.1304331          | 875.98290921 | -0.033371  | 1750.9585419 | 17 | D   | 5  | 720.35628192 | +0.1147874 | 720.35628192        |            |
|                     | 1848.0113058 |            | 1848.0113058 | 18 | P   | 4  | 605.32933889 | -0.3446587 | 605.32933889        |            |
| +0.0919389          | 974.04349809 |            | 1947.0797197 | 19 | V   | 3  | 508.27657504 |            | 508.27657504        |            |
| +0.1601935          | 1031.5569696 |            | 2062.1066627 | 20 | D   | 2  | 409.20816112 | +0.1490777 | 409.20816112        |            |
| -0.0941063          | 1105.0911766 |            | 2209.1750767 | 21 | F   | 1  | 294.18121809 | +0.0472975 | 294.18121809        |            |
|                     |              |            |              | 22 | K   | 0  | 147.11280417 |            | 147.11280417        |            |

general information

|                       |             |
|-----------------------|-------------|
| Annotation:           | 14 of 22    |
| AminoAcids Coverage:  | 64.%        |
| Intensity Coverage:   | 71.%        |
| Peak Coverage:        | 27.%        |
| Protein Localisation: | 329 ... 350 |

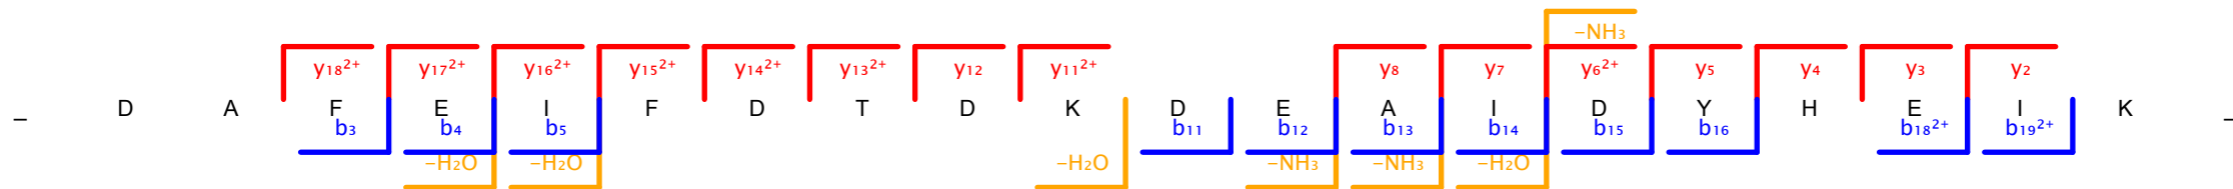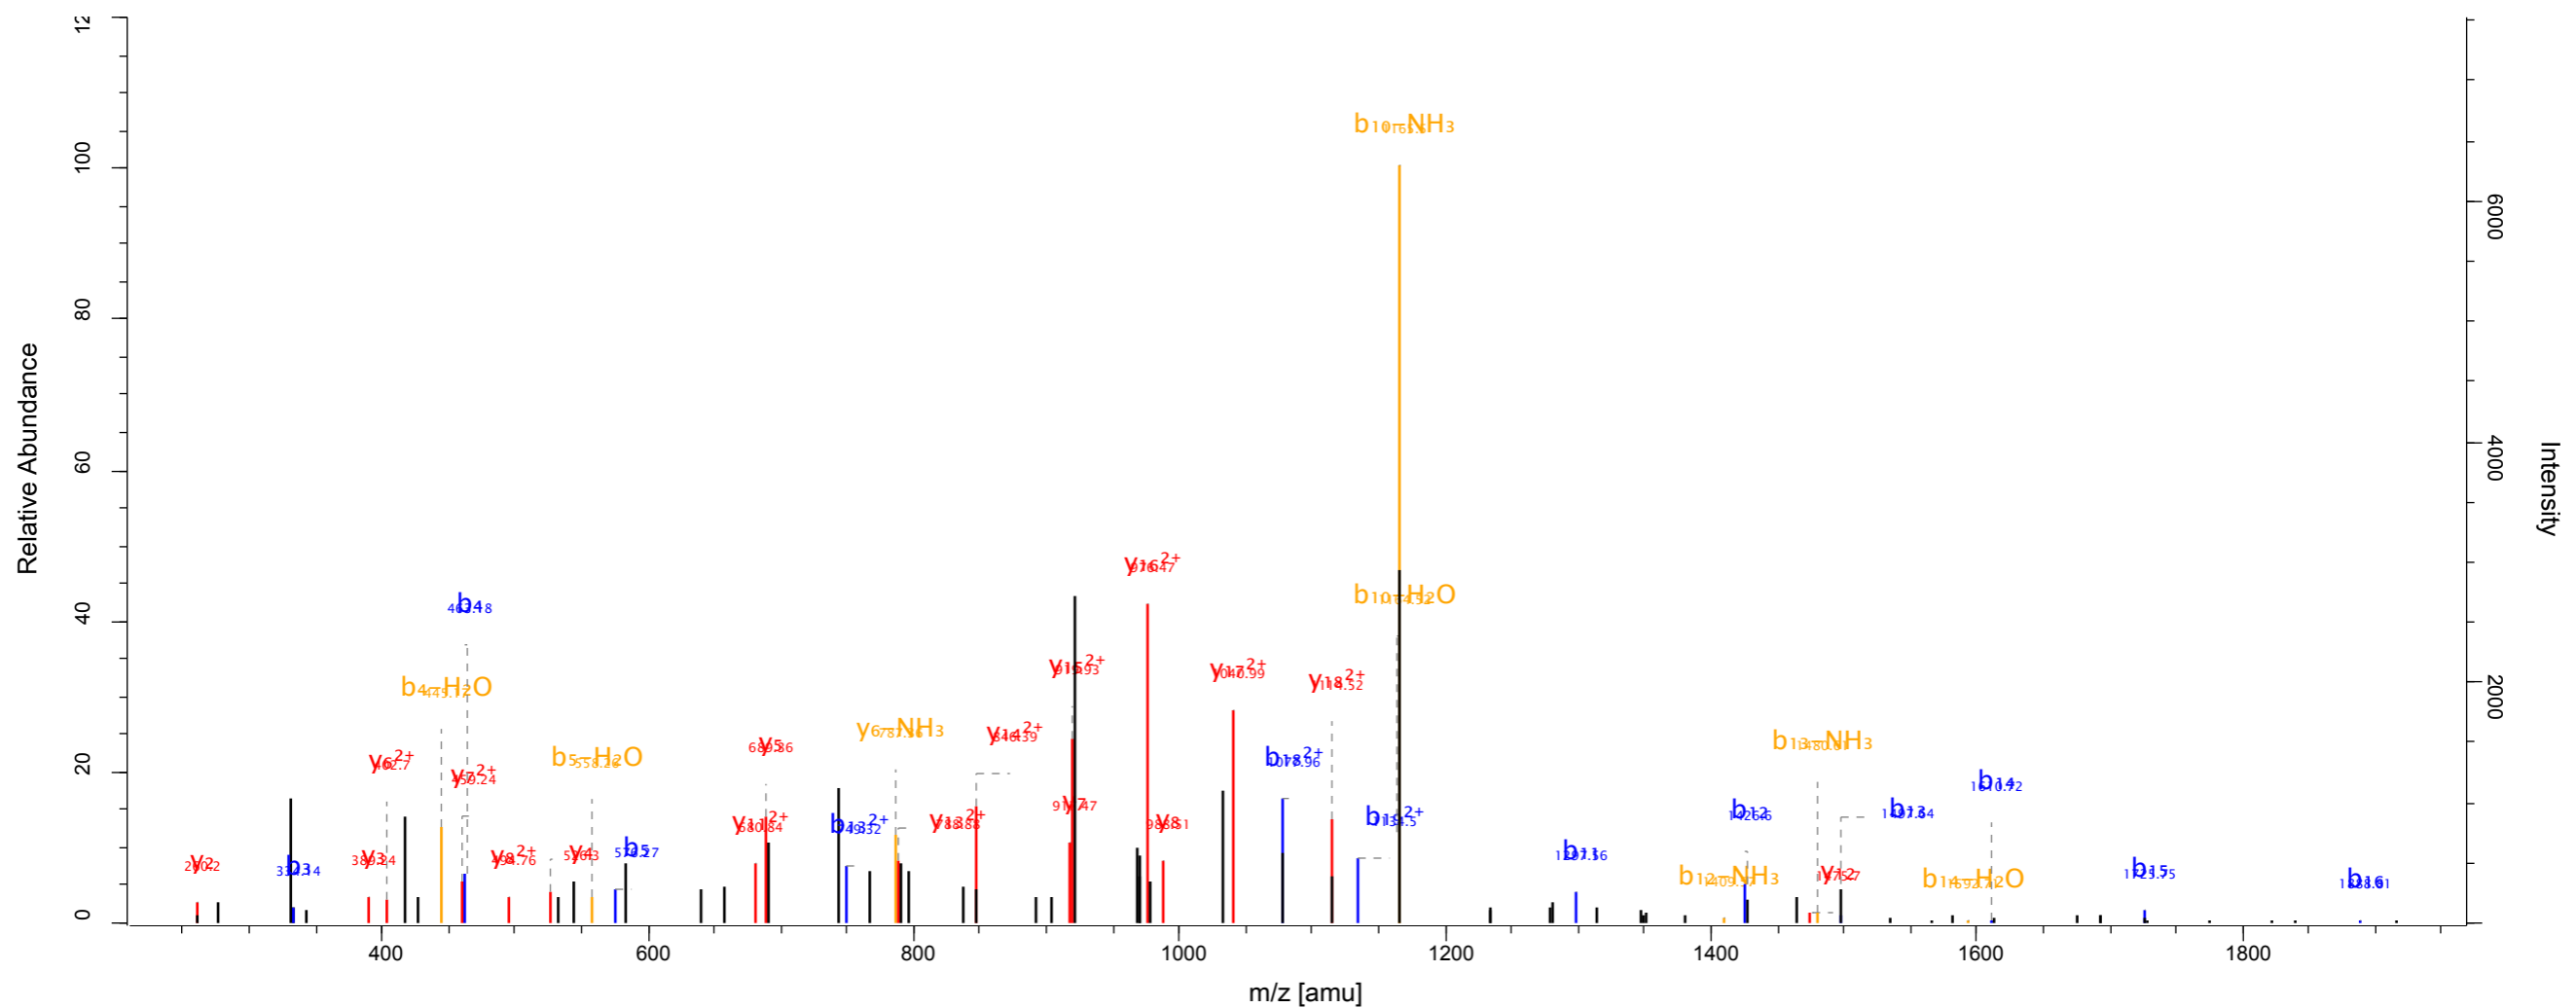

precursor information

|                   |                  |
|-------------------|------------------|
| Mass:             | 2412.00714       |
| m/z:              | 805.27200        |
| Charge:           | 2                |
| Retention time:   | 02.7274877020688 |
| Score:            | 185.1424         |
| Mass Error (ppm): | 0.41004          |
| DEP:              | 4.6274E-41       |
| Precursor Type:   | MULTI            |

| b <sup>2+</sup> ion |              | b ion      |              |    |     |    | y ion        |            | y <sup>2+</sup> ion |            |
|---------------------|--------------|------------|--------------|----|-----|----|--------------|------------|---------------------|------------|
| Δ dalton            | mass         | Δ dalton   | mass         |    | seq |    | Δ dalton     | mass       | Δ dalton            | mass       |
|                     | 116.0342195  |            | 116.0342195  | 1  | D   | 19 |              |            |                     |            |
|                     | 187.07133329 |            | 187.07133329 | 2  | A   | 18 | 2299.0764848 |            | 2299.0764848        |            |
|                     | 334.1397472  | -0.0315319 | 334.1397472  | 3  | F   | 17 | 2228.039371  |            | 1114.5233238        | +0.0914223 |
|                     | 463.1823403  | -0.228666  | 463.1823403  | 4  | E   | 16 | 2080.9709571 |            | 1040.9891168        | +0.3752631 |
|                     | 576.26640428 | -0.1975566 | 576.26640428 | 5  | I   | 15 | 1951.928364  |            | 976.46782025        | +0.2004537 |
|                     | 723.3348182  |            | 723.3348182  | 6  | F   | 14 | 1838.8443    |            | 919.92578826        | -0.02082   |
|                     | 838.36176123 |            | 838.36176123 | 7  | D   | 13 | 1691.7758861 |            | 846.3915813         | +0.0544636 |
|                     | 939.4094397  |            | 939.4094397  | 8  | T   | 12 | 1576.7489431 |            | 788.87810978        | -0.3010224 |
|                     | 1054.4363827 |            | 1054.4363827 | 9  | D   | 11 | 1475.7012646 | -0.4621289 | 1475.7012646        |            |
|                     | 1182.5313458 |            | 1182.5313458 | 10 | K   | 10 | 1360.6743216 |            | 680.84079903        | -0.11326   |
|                     | 1297.5582888 | -0.0838015 | 1297.5582888 | 11 | D   | 9  | 1232.5793586 |            | 1232.5793586        |            |
|                     | 1426.6008819 | -0.3014434 | 1426.6008819 | 12 | E   | 8  | 1117.5524155 |            | 1117.5524155        |            |
| -0.0078778          | 749.32263607 | -0.110774  | 1497.6379957 | 13 | A   | 7  | 988.50982245 | -0.134029  | 494.75854946        | +0.297847  |
|                     | 1610.7220596 | -0.0649552 | 1610.7220596 | 14 | I   | 6  | 917.47270866 | -0.167716  | 459.23999256        | -0.0309472 |
|                     | 1725.7490027 | -0.2679236 | 1725.7490027 | 15 | D   | 5  | 804.38864468 |            | 402.69796057        | -0.0226676 |
|                     | 1888.8123312 | +0.0176248 | 1888.8123312 | 16 | Y   | 4  | 689.36170165 | +0.0273364 | 689.36170165        |            |
|                     | 2025.8712431 |            | 2025.8712431 | 17 | H   | 3  | 526.29837311 | +0.099332  | 526.29837311        |            |
| -0.1130221          | 1077.9605563 |            | 2154.9138362 | 18 | E   | 2  | 389.23946125 | +0.120402  | 389.23946125        |            |
| -0.198145           | 1134.5025883 |            | 2267.9979002 | 19 | I   | 1  | 260.19686815 | -0.130584  | 260.19686815        |            |
|                     |              |            |              | 20 | K   | 0  | 147.11280417 |            | 147.11280417        |            |

general information

|                       |           |
|-----------------------|-----------|
| Annotation:           | 17 of 20  |
| AminoAcids Coverage:  | 85 %      |
| Intensity Coverage:   | 55 %      |
| Peak Coverage:        | 40 %      |
| Protein Localisation: | 32 ... 51 |



Scan number 12373 Raw file 20080623\_Orbi6\_SZ\_Exp2\_Susp\_InGel\_05  
 Method ITMS; CID Genenames SLC39A13

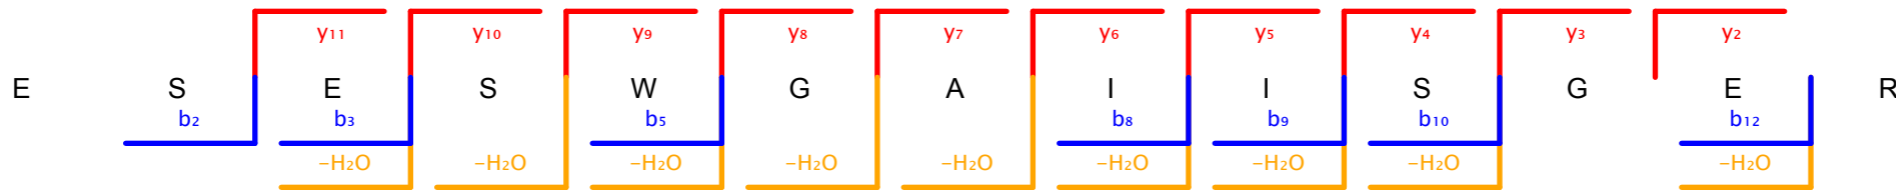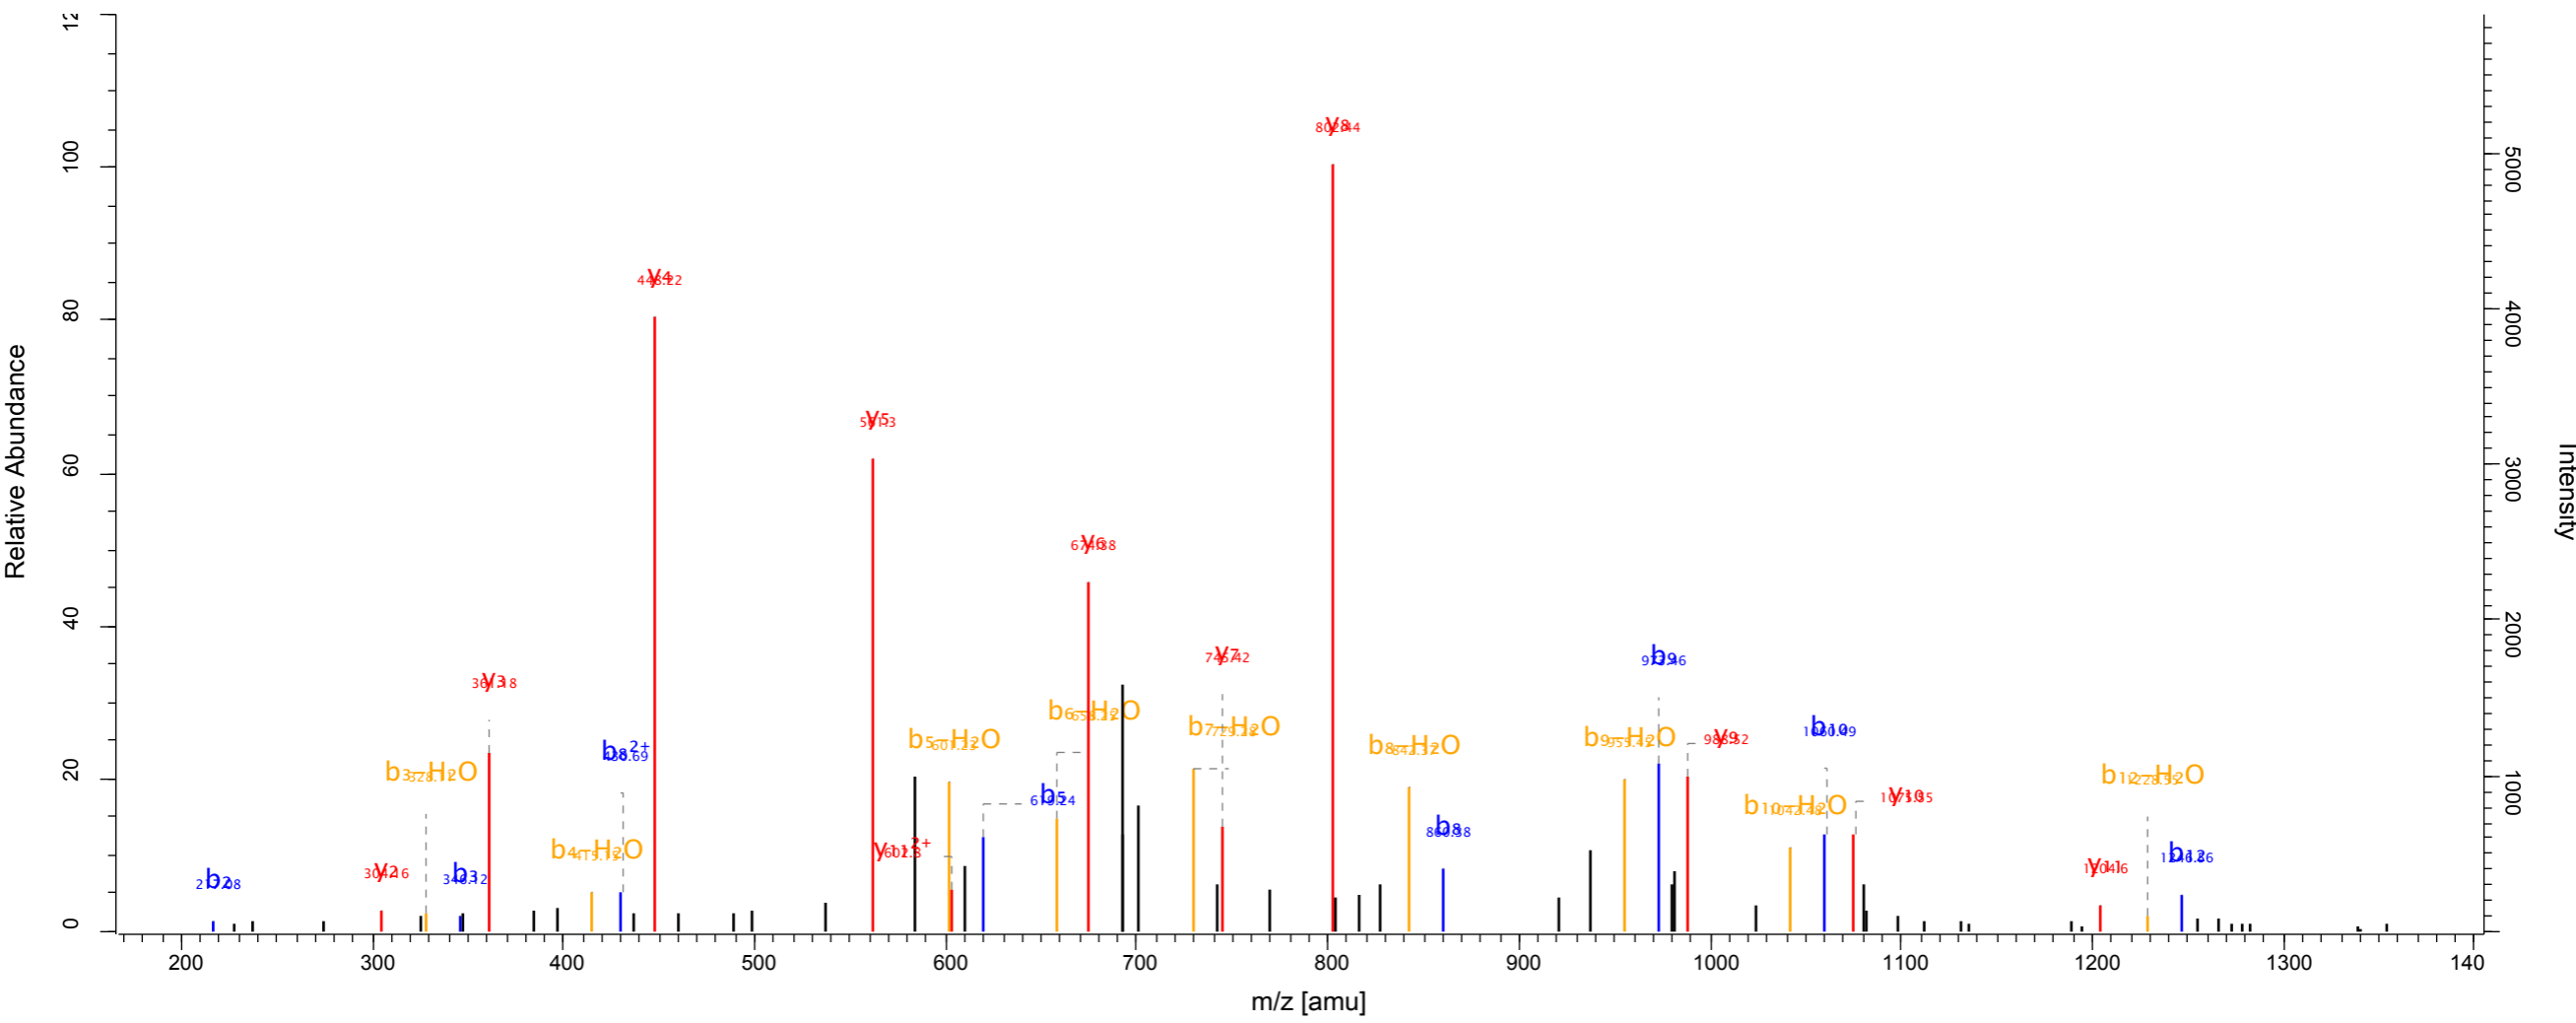

precursor information

|                   |                  |
|-------------------|------------------|
| Mass:             | 1410.66215       |
| m/z:              | 710.82885        |
| Charge:           | 2+               |
| Retention time:   | 82.1222847045808 |
| Score:            | 188.0500         |
| Mass Error (ppm): | 0.001604         |
| PEP:              | 1.8708E-09       |
| Precursor Type:   | MULTI            |

general information

|                       |           |
|-----------------------|-----------|
| Annotation:           | 11 of 12  |
| AminoAcids Coverage:  | 85 %      |
| Intensity Coverage:   | 72 %      |
| Peak Coverage:        | 20 %      |
| Protein Localisation: | 52 ... 64 |

| b <sup>2+</sup> ion |              | b ion      |              |    |     |    | y ion        |            | y <sup>2+</sup> ion |            |
|---------------------|--------------|------------|--------------|----|-----|----|--------------|------------|---------------------|------------|
| Δ dalton            | mass         | Δ dalton   | mass         |    | seq |    | Δ dalton     | mass       | Δ dalton            | mass       |
|                     | 130.04986956 |            | 130.04986956 | 1  | E   | 12 |              |            |                     |            |
|                     | 217.08189797 | +0.0632589 | 217.08189797 | 2  | S   | 11 | 1291.6277058 |            | 1291.6277058        |            |
|                     | 346.12449107 | +0.1775719 | 346.12449107 | 3  | E   | 10 | 1204.5956773 | -0.0790758 | 602.8014769         | -0.0144896 |
|                     | 433.15651948 |            | 433.15651948 | 4  | S   | 9  | 1075.5530842 | -0.1337727 | 1075.5530842        |            |
|                     | 619.23583243 | -0.2332079 | 619.23583243 | 5  | W   | 8  | 988.52105584 | -0.1564928 | 988.52105584        |            |
|                     | 676.25729616 |            | 676.25729616 | 6  | G   | 7  | 802.44174288 | -0.1238108 | 802.44174288        |            |
|                     | 747.29440994 |            | 747.29440994 | 7  | A   | 6  | 745.42027916 | -0.0132967 | 745.42027916        |            |
| -0.416569           | 430.6928752  | -0.1676585 | 860.37847392 | 8  | I   | 5  | 674.38316537 | -0.0380726 | 674.38316537        |            |
|                     | 973.4625379  | -0.2142469 | 973.4625379  | 9  | I   | 4  | 561.29910139 | -0.0094896 | 561.29910139        |            |
|                     | 1060.4945663 | -0.224913  | 1060.4945663 | 10 | S   | 3  | 448.21503741 | -0.047618  | 448.21503741        |            |
|                     | 1117.51603   |            | 1117.51603   | 11 | G   | 2  | 361.183009   | +0.0308582 | 361.183009          |            |
|                     | 1246.5586231 | -0.4776905 | 1246.5586231 | 12 | E   | 1  | 304.16154528 | +0.4527736 | 304.16154528        |            |
|                     |              |            |              | 13 | R   | 0  | 175.11895218 |            | 175.11895218        |            |

Scan number 18536 Raw file 20080623\_Orbi6\_SZ\_Exp2\_Susp\_InGel\_07  
 Method ITMS; CID Genenames ZWINT

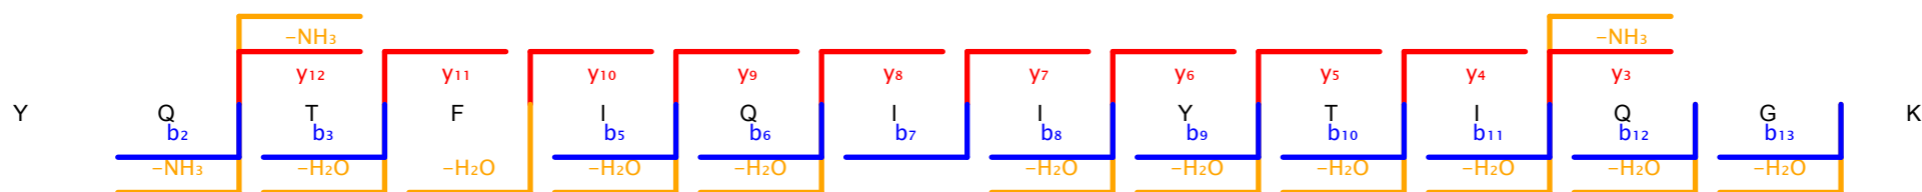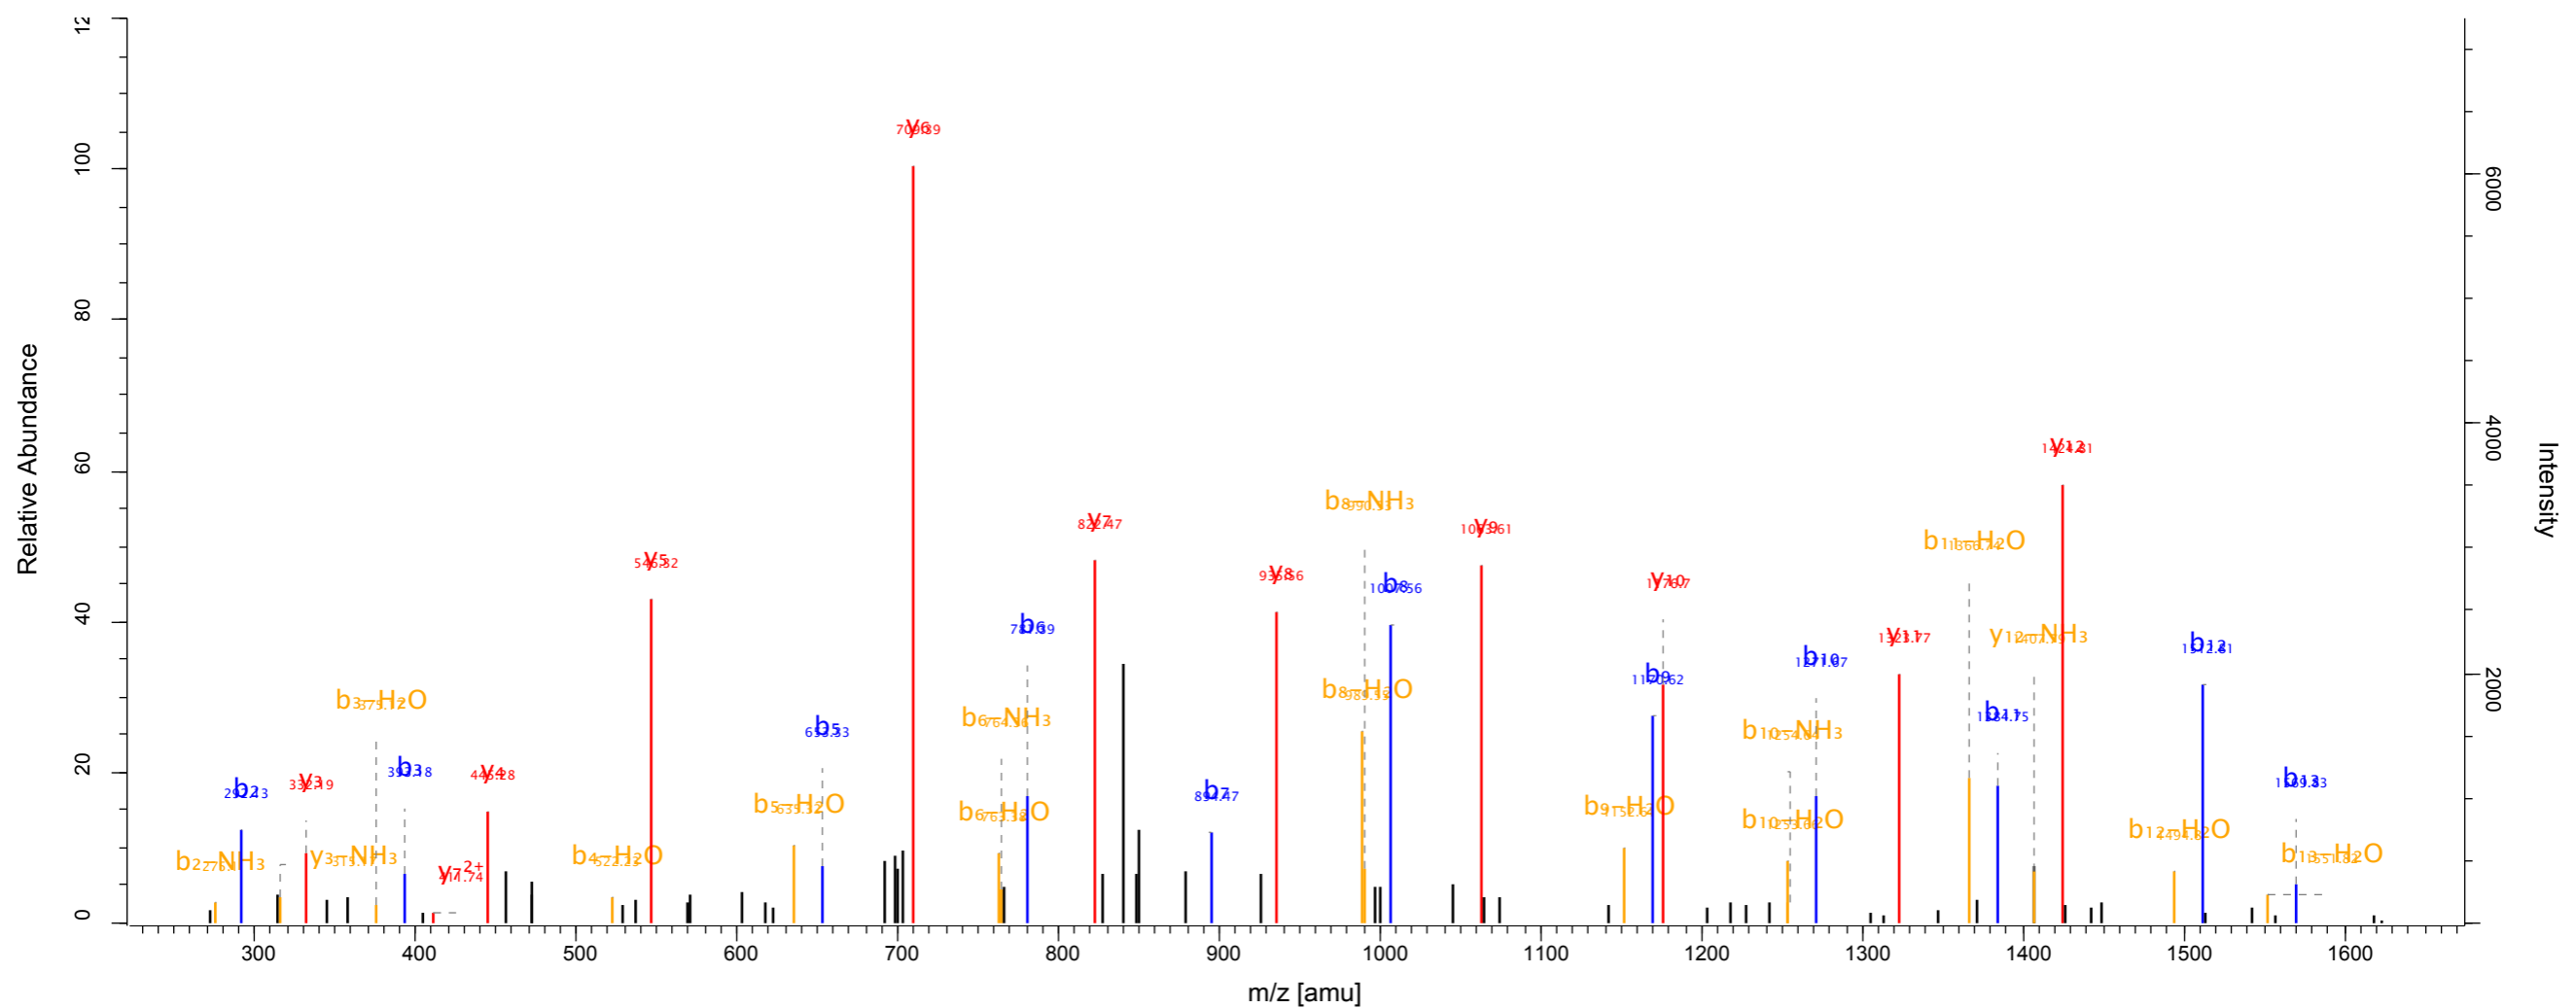

precursor information

|                   |                  |
|-------------------|------------------|
| Mass:             | 1714.02060       |
| m/z:              | 858.47212        |
| Charge:           | 2+               |
| Retention time:   | 118.041102626052 |
| Score:            | 270.7686         |
| Mass Error (ppm): | 0.16722          |
| PEP:              | 1.20655127       |
| Precursor Type:   | MULTI            |

| b ion      |                |    |     |    | y ion          |            | y <sup>2+</sup> ion |            |
|------------|----------------|----|-----|----|----------------|------------|---------------------|------------|
| Δ dalton   | mass           |    | seq |    | Δ dalton       | mass       | Δ dalton            | mass       |
|            | 164.070605005  | 1  | Y   | 13 |                |            |                     |            |
| -0.0502641 | 292.129182516  | 2  | Q   | 12 | 1552.873355753 |            | 1552.873355753      |            |
| +0.0611761 | 393.17686099   | 3  | T   | 11 | 1424.814778241 | -0.2046708 | 1424.814778241      |            |
|            | 540.245274907  | 4  | F   | 10 | 1323.767099767 | -0.2368263 | 1323.767099767      |            |
| -0.329522  | 653.329338887  | 5  | I   | 9  | 1176.698685851 | -0.1560833 | 1176.698685851      |            |
| -0.1759413 | 781.387916398  | 6  | Q   | 8  | 1063.614621871 | -0.2275369 | 1063.614621871      |            |
| +0.0955855 | 894.471980379  | 7  | I   | 7  | 935.556044359  | -0.1046283 | 935.556044359       |            |
| -0.2063739 | 1007.556044359 | 8  | I   | 6  | 822.471980379  | -0.1082108 | 411.739628423       | -0.3460737 |
| -0.2189823 | 1170.619372898 | 9  | Y   | 5  | 709.387916398  | -0.1153944 | 709.387916398       |            |
| -0.3551617 | 1271.667051372 | 10 | T   | 4  | 546.32458786   | +0.0059785 | 546.32458786        |            |
| -0.2428146 | 1384.751115352 | 11 | I   | 3  | 445.276909386  | -0.0301442 | 445.276909386       |            |
| -0.3685308 | 1512.809692863 | 12 | Q   | 2  | 332.192845406  | +0.0948133 | 332.192845406       |            |
| -0.2940472 | 1569.831156587 | 13 | G   | 1  | 204.134267894  |            | 204.134267894       |            |
|            |                | 14 | K   | 0  | 147.112804171  |            | 147.112804171       |            |

general information

|                       |             |
|-----------------------|-------------|
| Annotation:           | 12 of 14    |
| AminoAcids Coverage:  | 86%         |
| Intensity Coverage:   | 77%         |
| Peak Coverage:        | 44%         |
| Protein Localisation: | 209 ... 222 |

Scan number 10055 Raw file 20080623\_Orbi6\_SZ\_Exp2\_Susp\_InGel\_10  
 Method ITMS; CID Genenames GPT2

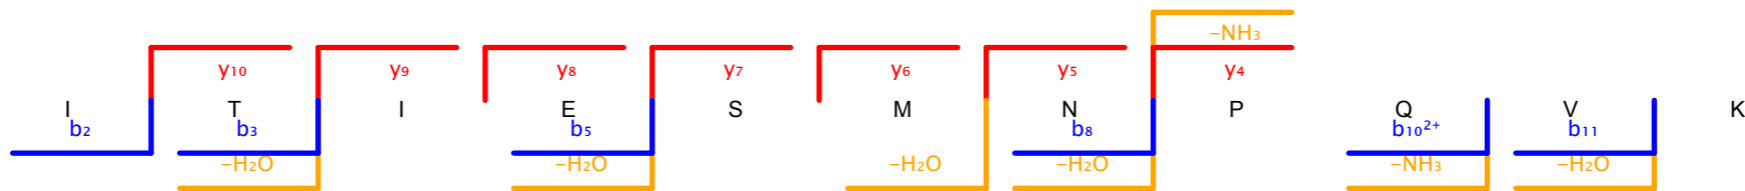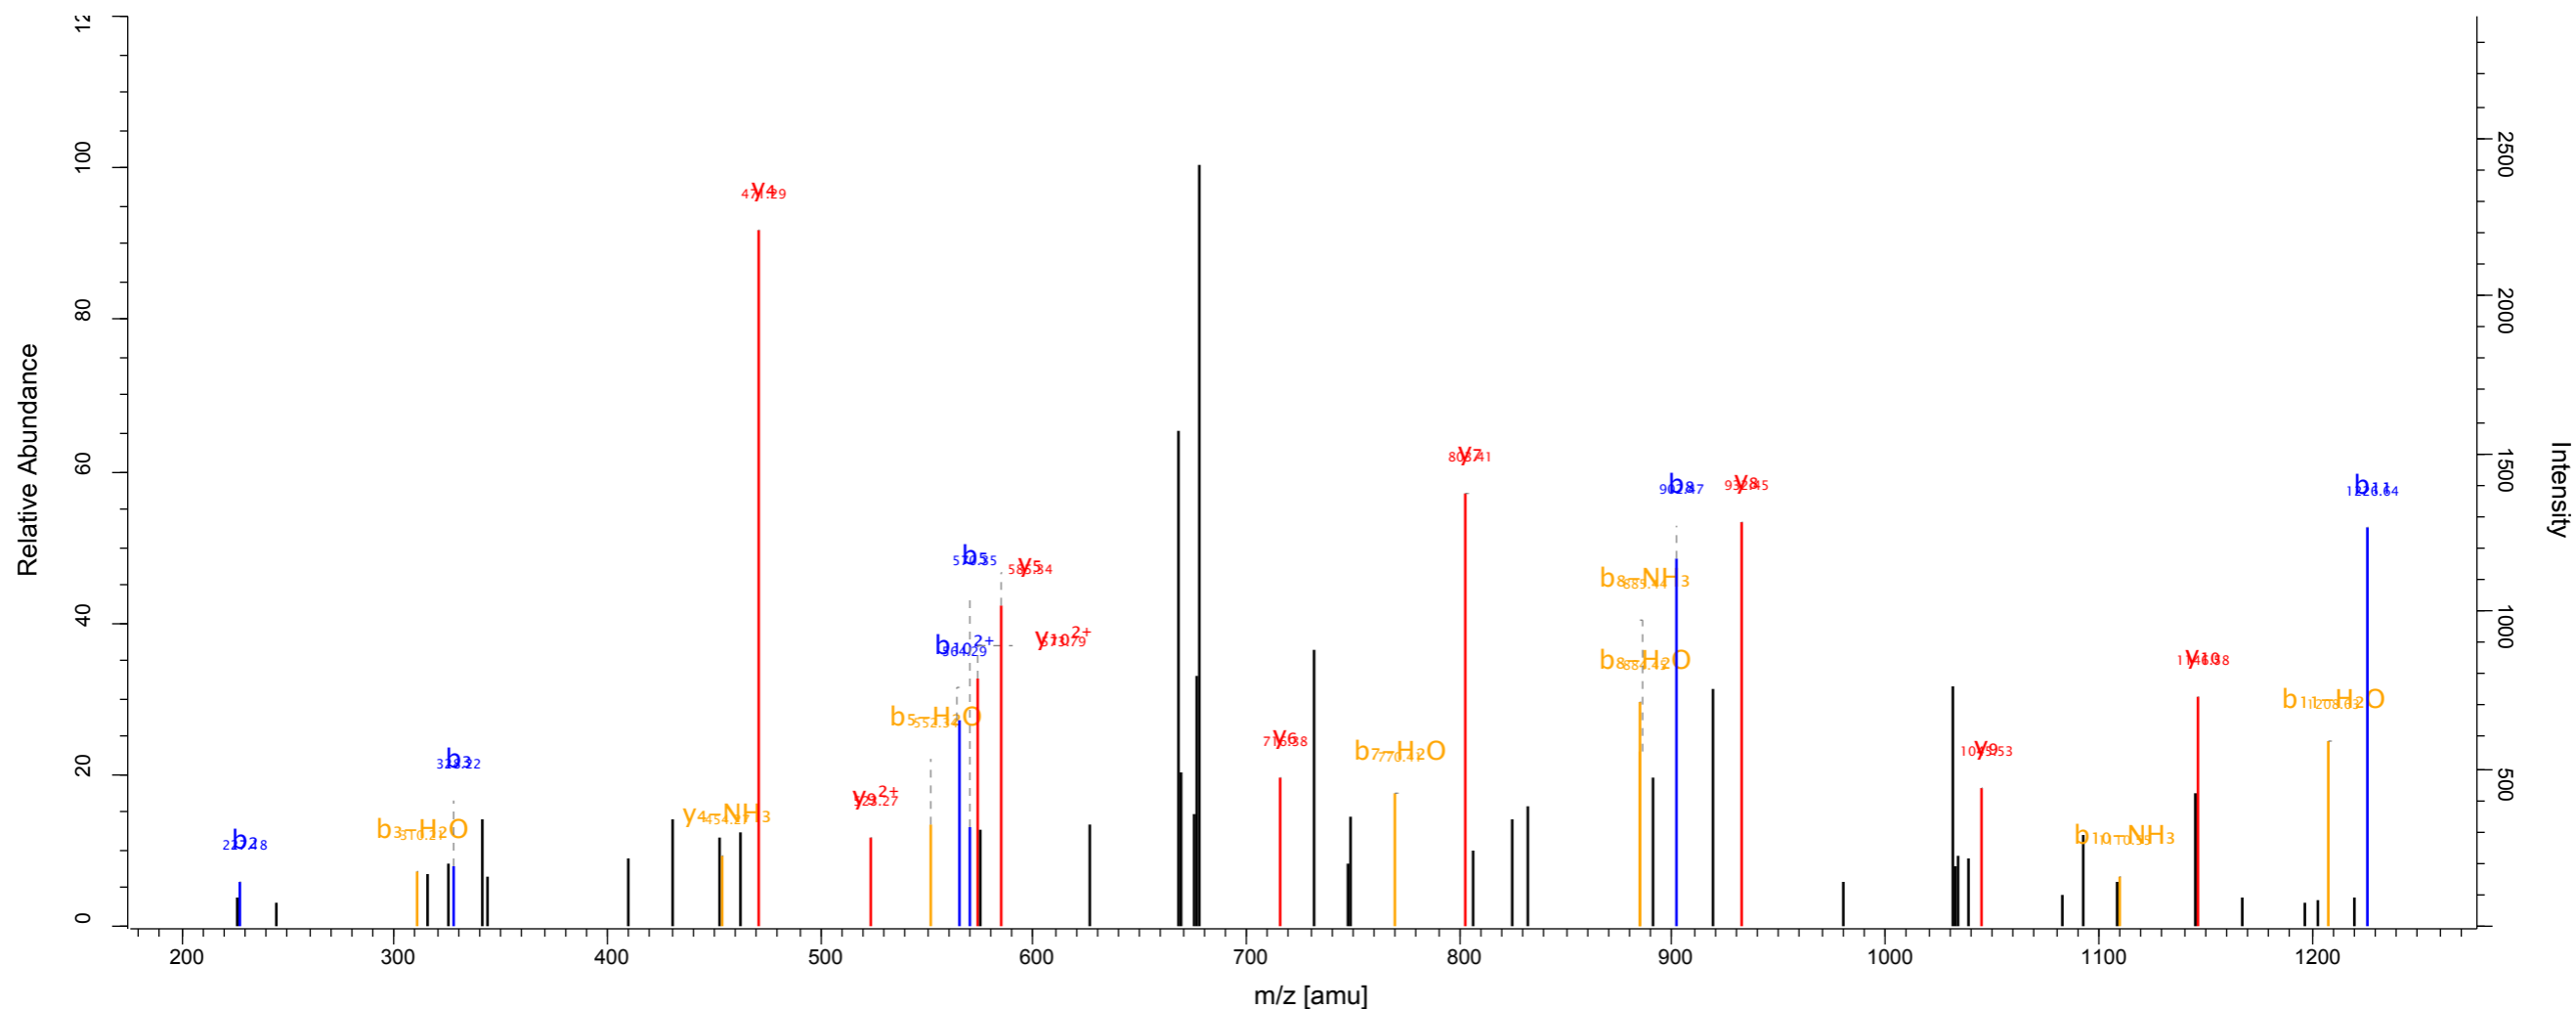

precursor information

|                   |                  |
|-------------------|------------------|
| Mass:             | 1271.71200       |
| m/z:              | 686.87277        |
| Charge:           | 2+               |
| Retention time:   | 71.7356401088867 |
| Score:            | 136.0225         |
| Mass Error [ppm]: | -0.1450          |
| PEP:              | 0.0002504        |
| Precursor Type:   | ISO              |

general information

|                       |           |
|-----------------------|-----------|
| Annotation:           | 10 of 12  |
| AminoAcids Coverage:  | 82 %      |
| Intensity Coverage:   | 51 %      |
| Peak Coverage:        | 28 %      |
| Protein Localisation: | 47 ... 58 |

| b <sup>2+</sup> ion |              | b ion      |              |    |     |    | y ion        |            | y <sup>2+</sup> ion |            |
|---------------------|--------------|------------|--------------|----|-----|----|--------------|------------|---------------------|------------|
| Δ dalton            | mass         | Δ dalton   | mass         |    | seq |    | Δ dalton     | mass       | Δ dalton            | mass       |
|                     | 114.09134045 |            | 114.09134045 | 1  | I   | 11 |              |            |                     |            |
|                     | 227.17540443 | -0.1324052 | 227.17540443 | 2  | I   | 10 | 1259.6663994 |            | 1259.6663994        |            |
|                     | 328.2230829  | +0.1058966 | 328.2230829  | 3  | T   | 9  | 1146.5823355 | -0.0945425 | 573.79480597        | +0.029779  |
|                     | 441.30714688 |            | 441.30714688 | 4  | I   | 8  | 1045.534657  | -0.1489148 | 523.27096673        | -0.0955517 |
|                     | 570.34973998 | -0.0839319 | 570.34973998 | 5  | E   | 7  | 932.45059301 | -0.1307078 | 932.45059301        |            |
|                     | 657.38176839 |            | 657.38176839 | 6  | S   | 6  | 803.40799991 | -0.1600141 | 803.40799991        |            |
|                     | 788.42225299 |            | 788.42225299 | 7  | M   | 5  | 716.3759715  | -0.1700999 | 716.3759715         |            |
|                     | 902.46518044 | -0.2286082 | 902.46518044 | 8  | N   | 4  | 585.3354869  | -0.0160899 | 585.3354869         |            |
|                     | 999.51794429 |            | 999.51794429 | 9  | P   | 3  | 471.29255945 | -0.1013363 | 471.29255945        |            |
| +0.4032913          | 564.29189914 |            | 1127.5765218 | 10 | Q   | 2  | 374.2397956  |            | 374.2397956         |            |
|                     | 1226.6449357 | -0.2082902 | 1226.6449357 | 11 | V   | 1  | 246.18121809 |            | 246.18121809        |            |
|                     |              |            |              | 12 | K   | 0  | 147.11280417 |            | 147.11280417        |            |

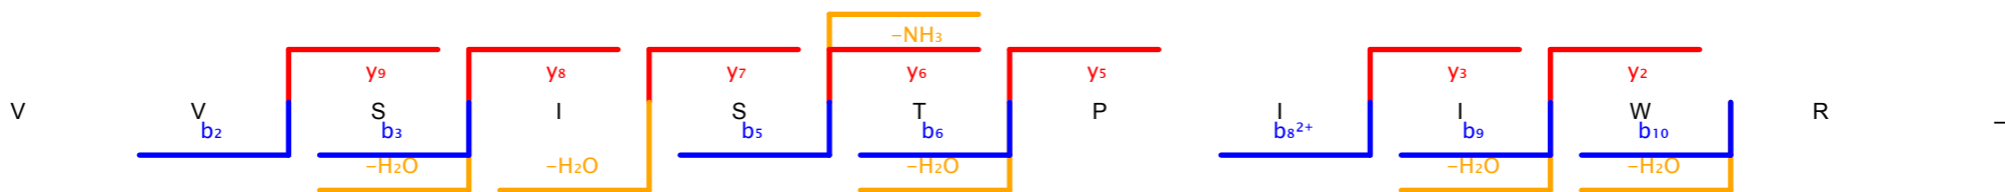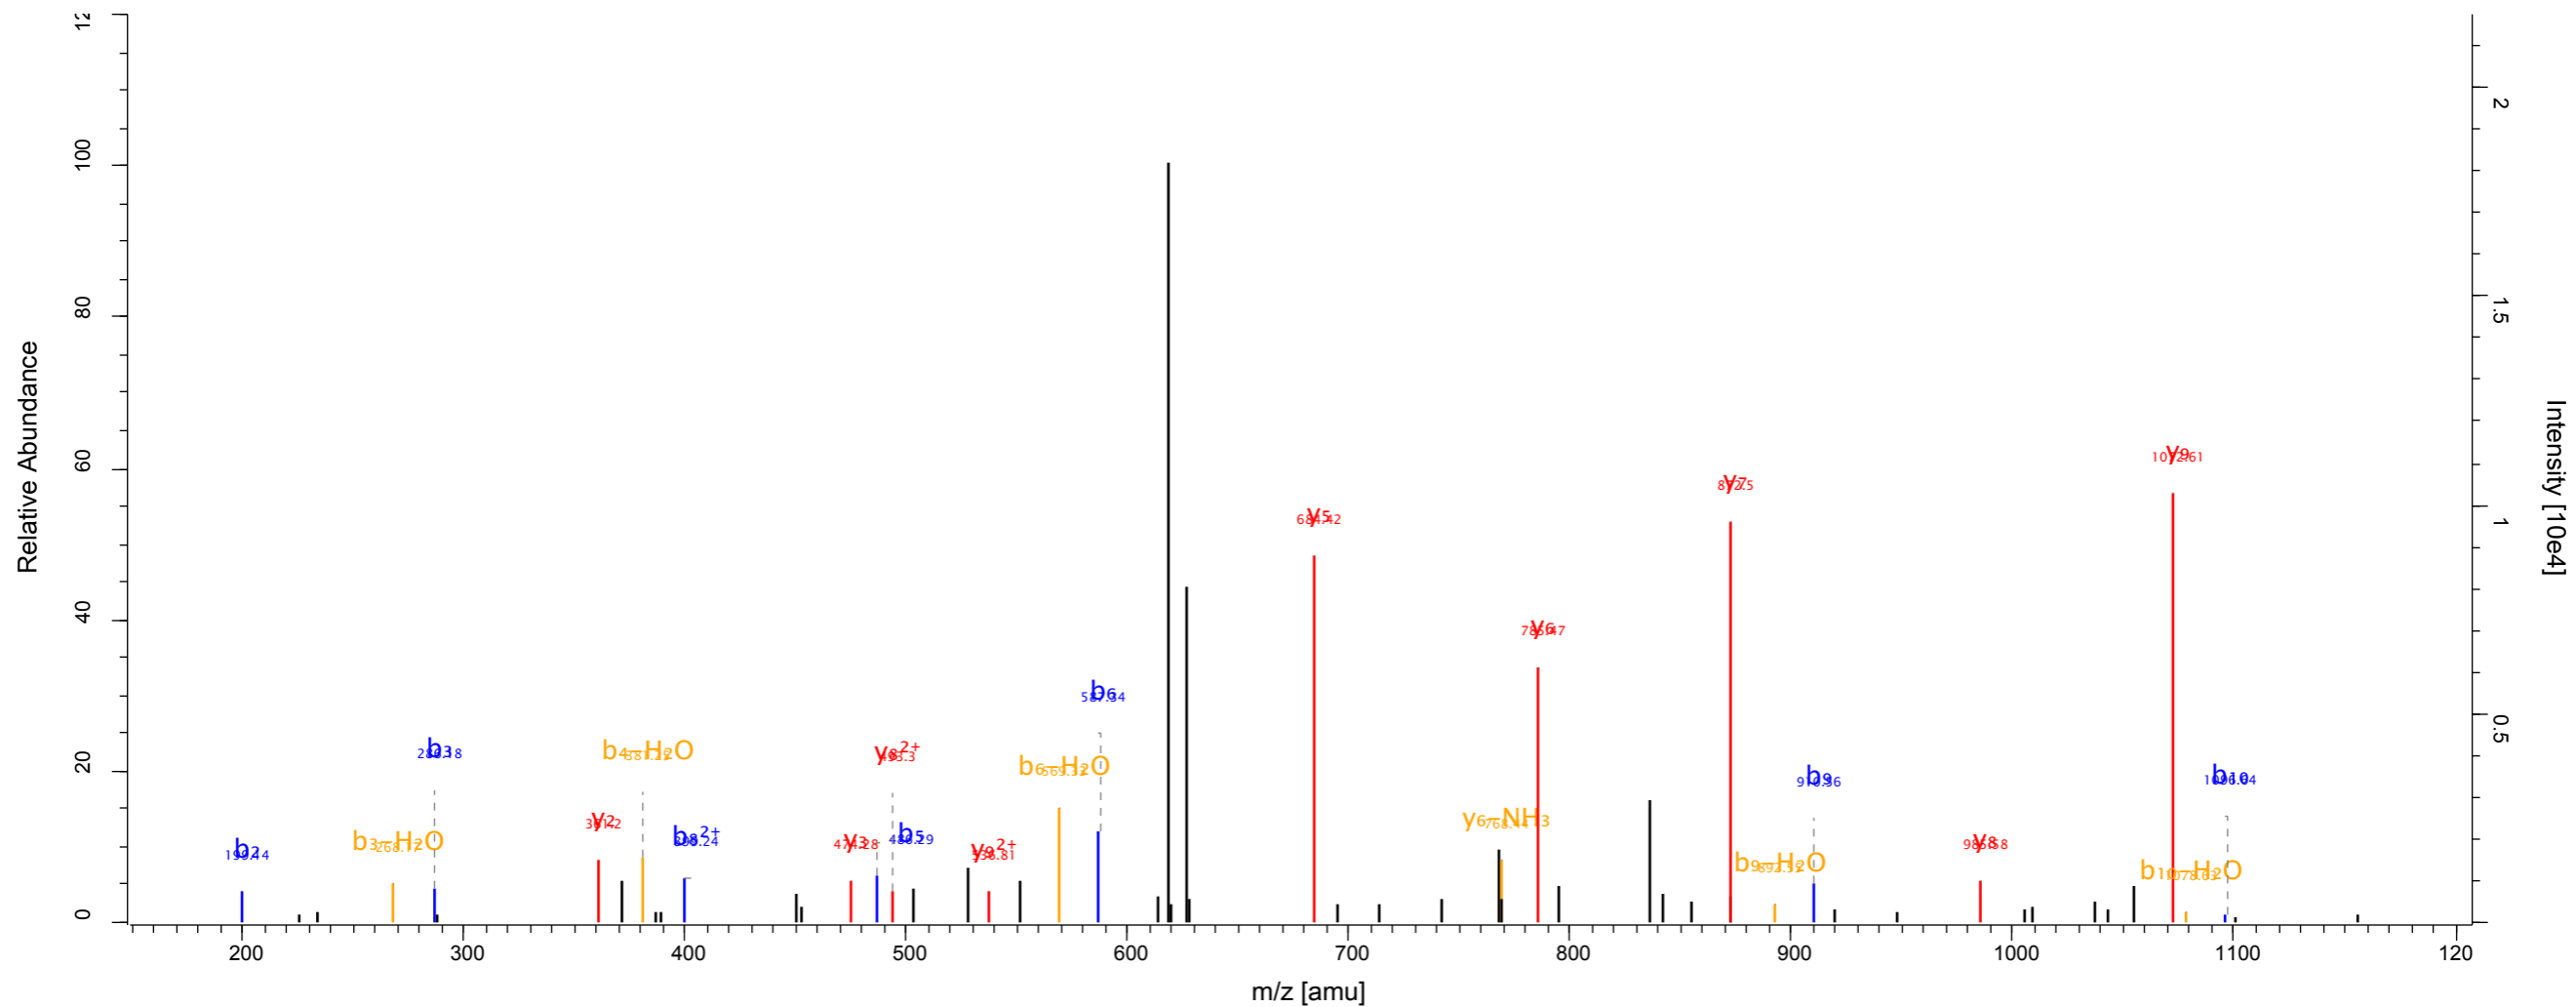

precursor information

|                   |                  |
|-------------------|------------------|
| Mass:             | 1260.74421       |
| m/z:              | 625.87038        |
| Charge:           | 2+               |
| Retentiontime:    | 88.2350677190234 |
| Score:            | 152.5305         |
| Mass Error (ppm): | -0.23774         |
| PEP:              | 1.577E-06        |
| Precursor-Type:   | MULTI            |

general information

|                       |             |
|-----------------------|-------------|
| Annotation:           | 9 of 11     |
| AminoAcids Coverage:  | 82 %        |
| Intensity Coverage:   | 54 %        |
| Peak Coverage:        | 30 %        |
| Protein Localisation: | 348 ... 358 |

| b <sup>2+</sup> ion |              | b ion      |              |    |     |    | y ion        |            | y <sup>2+</sup> ion |            |
|---------------------|--------------|------------|--------------|----|-----|----|--------------|------------|---------------------|------------|
| Δ dalton            | mass         | Δ dalton   | mass         |    | seq |    | Δ dalton     | mass       | Δ dalton            | mass       |
|                     | 100.07569038 |            | 100.07569038 | 1  | V   | 10 |              |            |                     |            |
|                     | 199.1441043  | -0.073334  | 199.1441043  | 2  | V   | 9  | 1171.6833701 |            | 1171.6833701        |            |
|                     | 286.17613271 | +0.0178065 | 286.17613271 | 3  | S   | 8  | 1072.6149562 | -0.1252101 | 536.81111634        | +0.1004437 |
|                     | 399.26019669 |            | 399.26019669 | 4  | I   | 7  | 985.58292781 | +0.043537  | 493.29510214        | -0.148984  |
|                     | 486.2922251  | -0.0464976 | 486.2922251  | 5  | S   | 6  | 872.49886383 | +0.089332  | 872.49886383        |            |
|                     | 587.33990357 | -0.2177722 | 587.33990357 | 6  | T   | 5  | 785.46683542 | -0.1469502 | 785.46683542        |            |
|                     | 684.39266743 |            | 684.39266743 | 7  | P   | 4  | 684.41915695 | -0.0120525 | 684.41915695        |            |
| -0.2139888          | 399.24200394 |            | 797.47673141 | 8  | I   | 3  | 587.3663931  |            | 587.3663931         |            |
|                     | 910.56079539 | -0.2304731 | 910.56079539 | 9  | I   | 2  | 474.28232911 | +0.04427   | 474.28232911        |            |
|                     | 1096.6401083 | -0.2286093 | 1096.6401083 | 10 | W   | 1  | 361.19826513 | +0.128395  | 361.19826513        |            |
|                     |              |            |              | 11 | R   | 0  | 175.11895218 |            | 175.11895218        |            |

Scan number 16262 Raw file 20080623\_Orbi6\_SZ\_Exp2\_Susp\_InGel\_15  
 Method ITMS; CID Genenames ZNF778

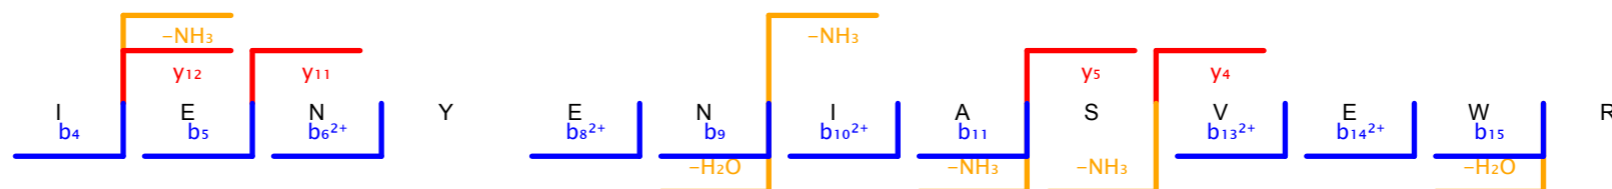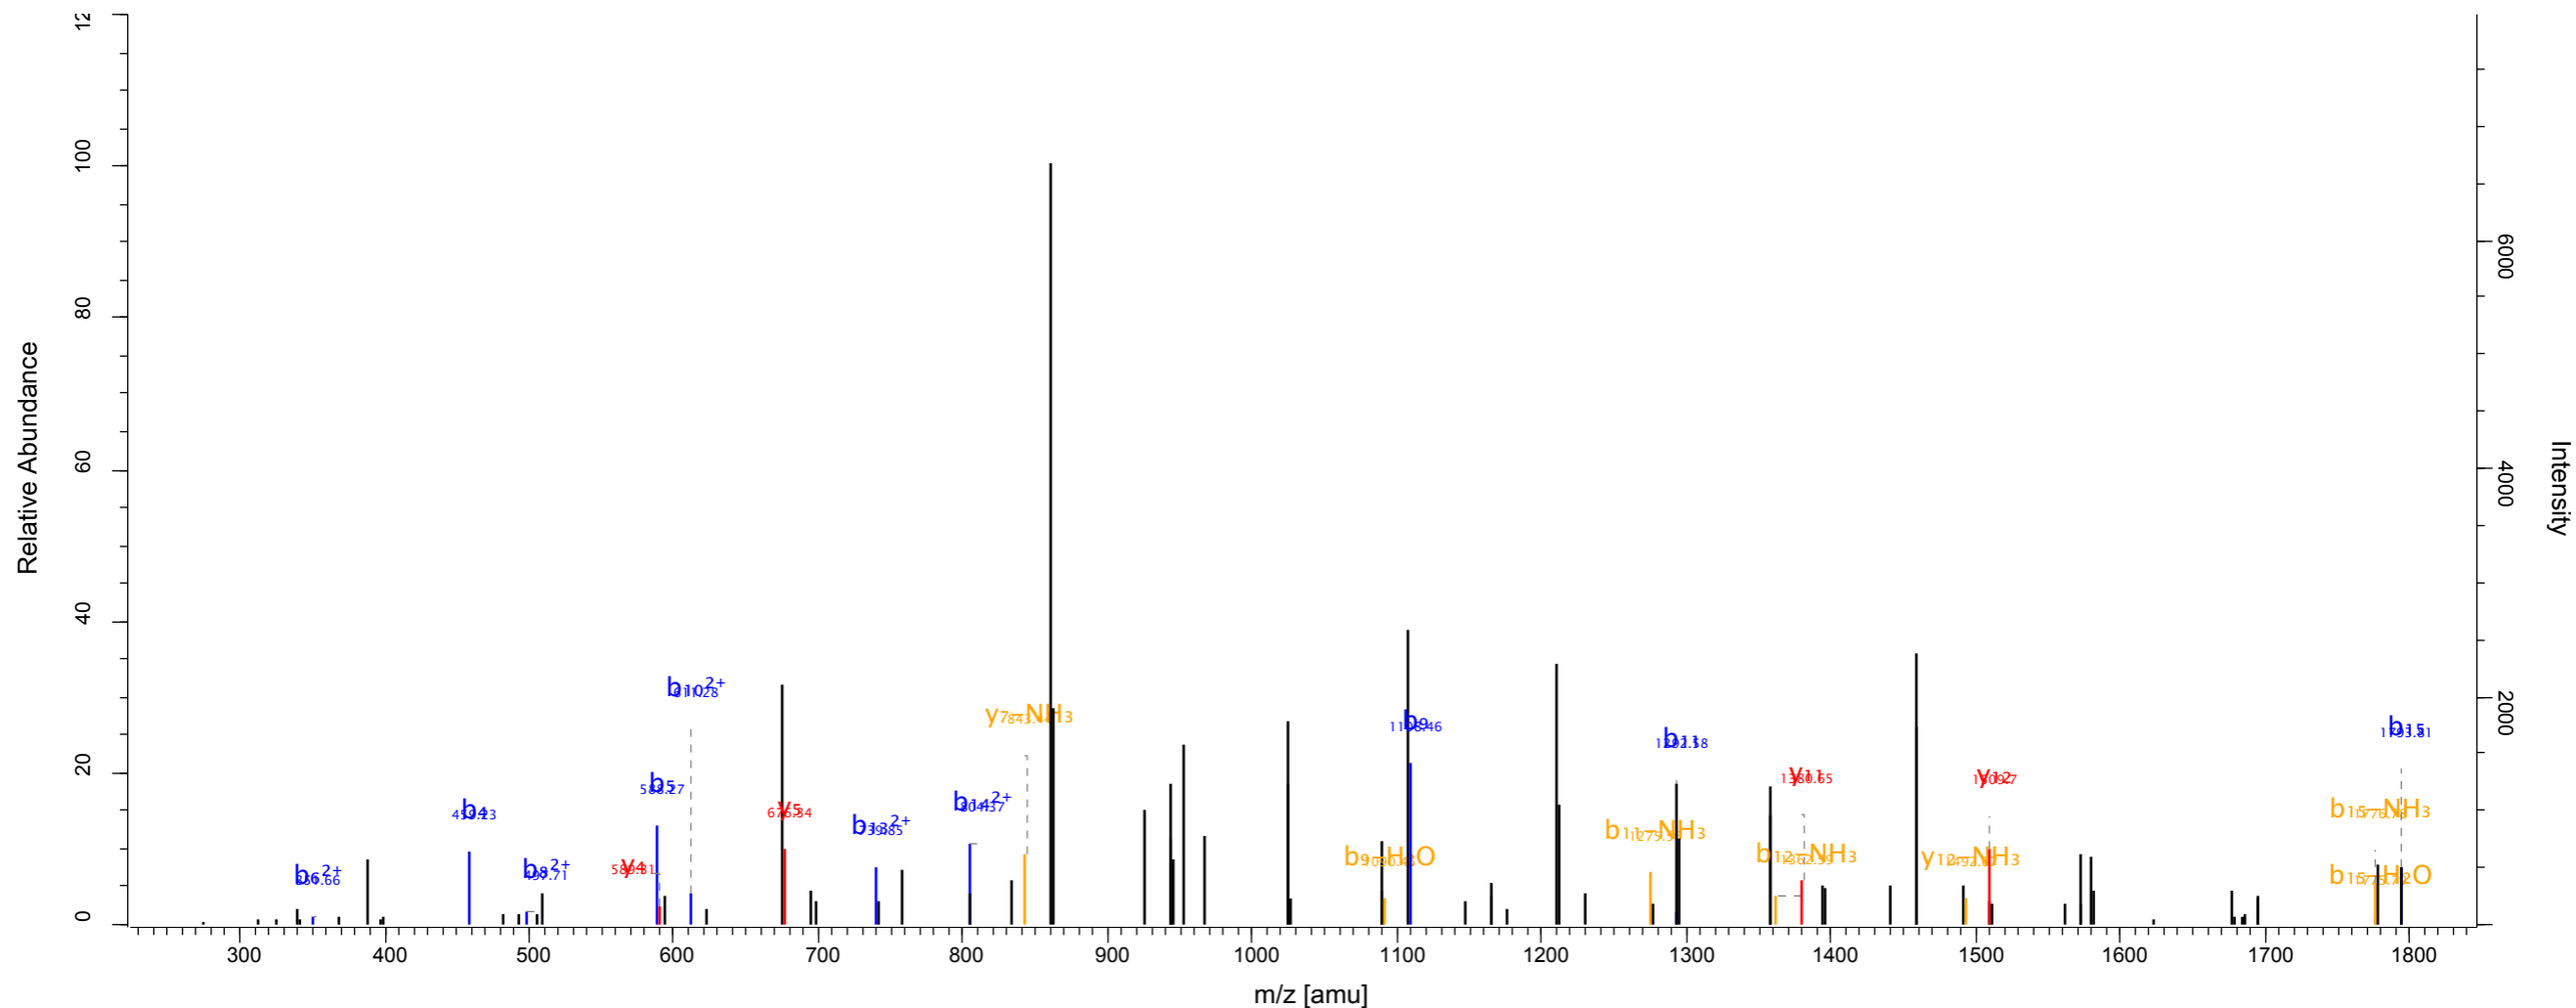

precursor information

|                   |                  |
|-------------------|------------------|
| Mass:             | 1066.00072       |
| m/z:              | 084.46214        |
| Charge:           | 2+               |
| Retention time:   | 102.448577880850 |
| Score:            | 00.04125         |
| Mass Error [ppm]: | 0.12224          |
| DEP:              | 0.00025152       |
| Precursor Type:   | MULTI            |

general information

|                       |           |
|-----------------------|-----------|
| Annotation:           | 11 of 16  |
| AminoAcids Coverage:  | 60%       |
| Intensity Coverage:   | 17%       |
| Peak Coverage:        | 23%       |
| Protein Localisation: | 69 ... 84 |

| b <sup>2+</sup> ion |                | b ion      |                |     | y ion |          |                |            |
|---------------------|----------------|------------|----------------|-----|-------|----------|----------------|------------|
| Δ dalton            | mass           | Δ dalton   | mass           | seq |       | Δ dalton | mass           |            |
|                     | 116.034219499  |            | 116.034219499  | 1   | D     | 15       |                |            |
|                     | 215.102633415  |            | 215.102633415  | 2   | V     | 14       | 1852.889810453 |            |
|                     | 346.143118021  |            | 346.143118021  | 3   | M     | 13       | 1753.821396537 |            |
|                     | 459.227182001  | -0.0206696 | 459.227182001  | 4   | I     | 12       | 1622.780911931 |            |
|                     | 588.269775098  | +0.0781253 | 588.269775098  | 5   | E     | 11       | 1509.69684795  | -0.3216038 |
| -0.4032146          | 351.659989506  |            | 702.312702545  | 6   | N     | 10       | 1380.654254854 | -0.2699775 |
|                     | 865.376031083  |            | 865.376031083  | 7   | Y     | 9        | 1266.611327407 |            |
| +0.4629225          | 497.712950323  |            | 994.418624179  | 8   | E     | 8        | 1103.547998868 |            |
|                     | 1108.461551626 | -0.0855751 | 1108.461551626 | 9   | N     | 7        | 974.505405772  |            |
| +0.1096624          | 611.276446037  |            | 1221.545615607 | 10  | I     | 6        | 860.462478325  |            |
|                     | 1292.582729395 | -0.174038  | 1292.582729395 | 11  | A     | 5        | 747.378414345  |            |
|                     | 1379.614757805 |            | 1379.614757805 | 12  | S     | 4        | 676.341300557  | -0.1057049 |
| +0.4085601          | 739.845224094  |            | 1478.683171721 | 13  | V     | 3        | 589.309272147  | +0.0457083 |
| +0.0574296          | 804.366520642  |            | 1607.725764817 | 14  | E     | 2        | 490.240858231  |            |
|                     | 1793.80507777  | -0.2892086 | 1793.80507777  | 15  | W     | 1        | 361.198265134  |            |
|                     |                |            |                | 16  | R     | 0        | 175.118952181  |            |

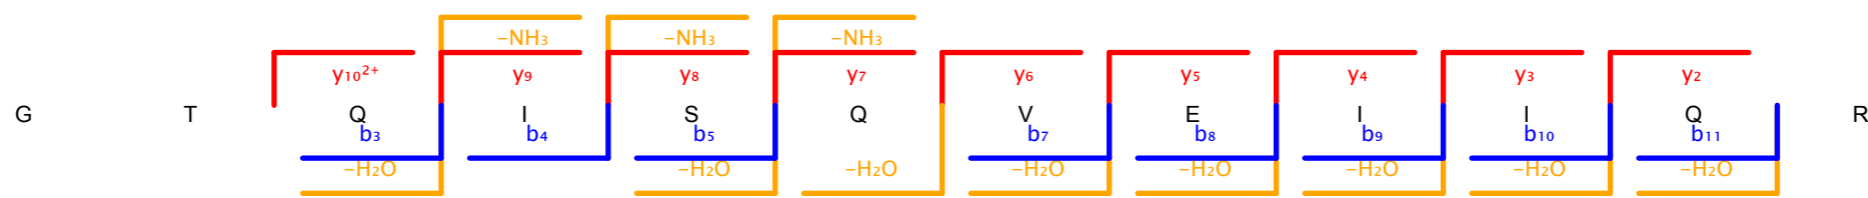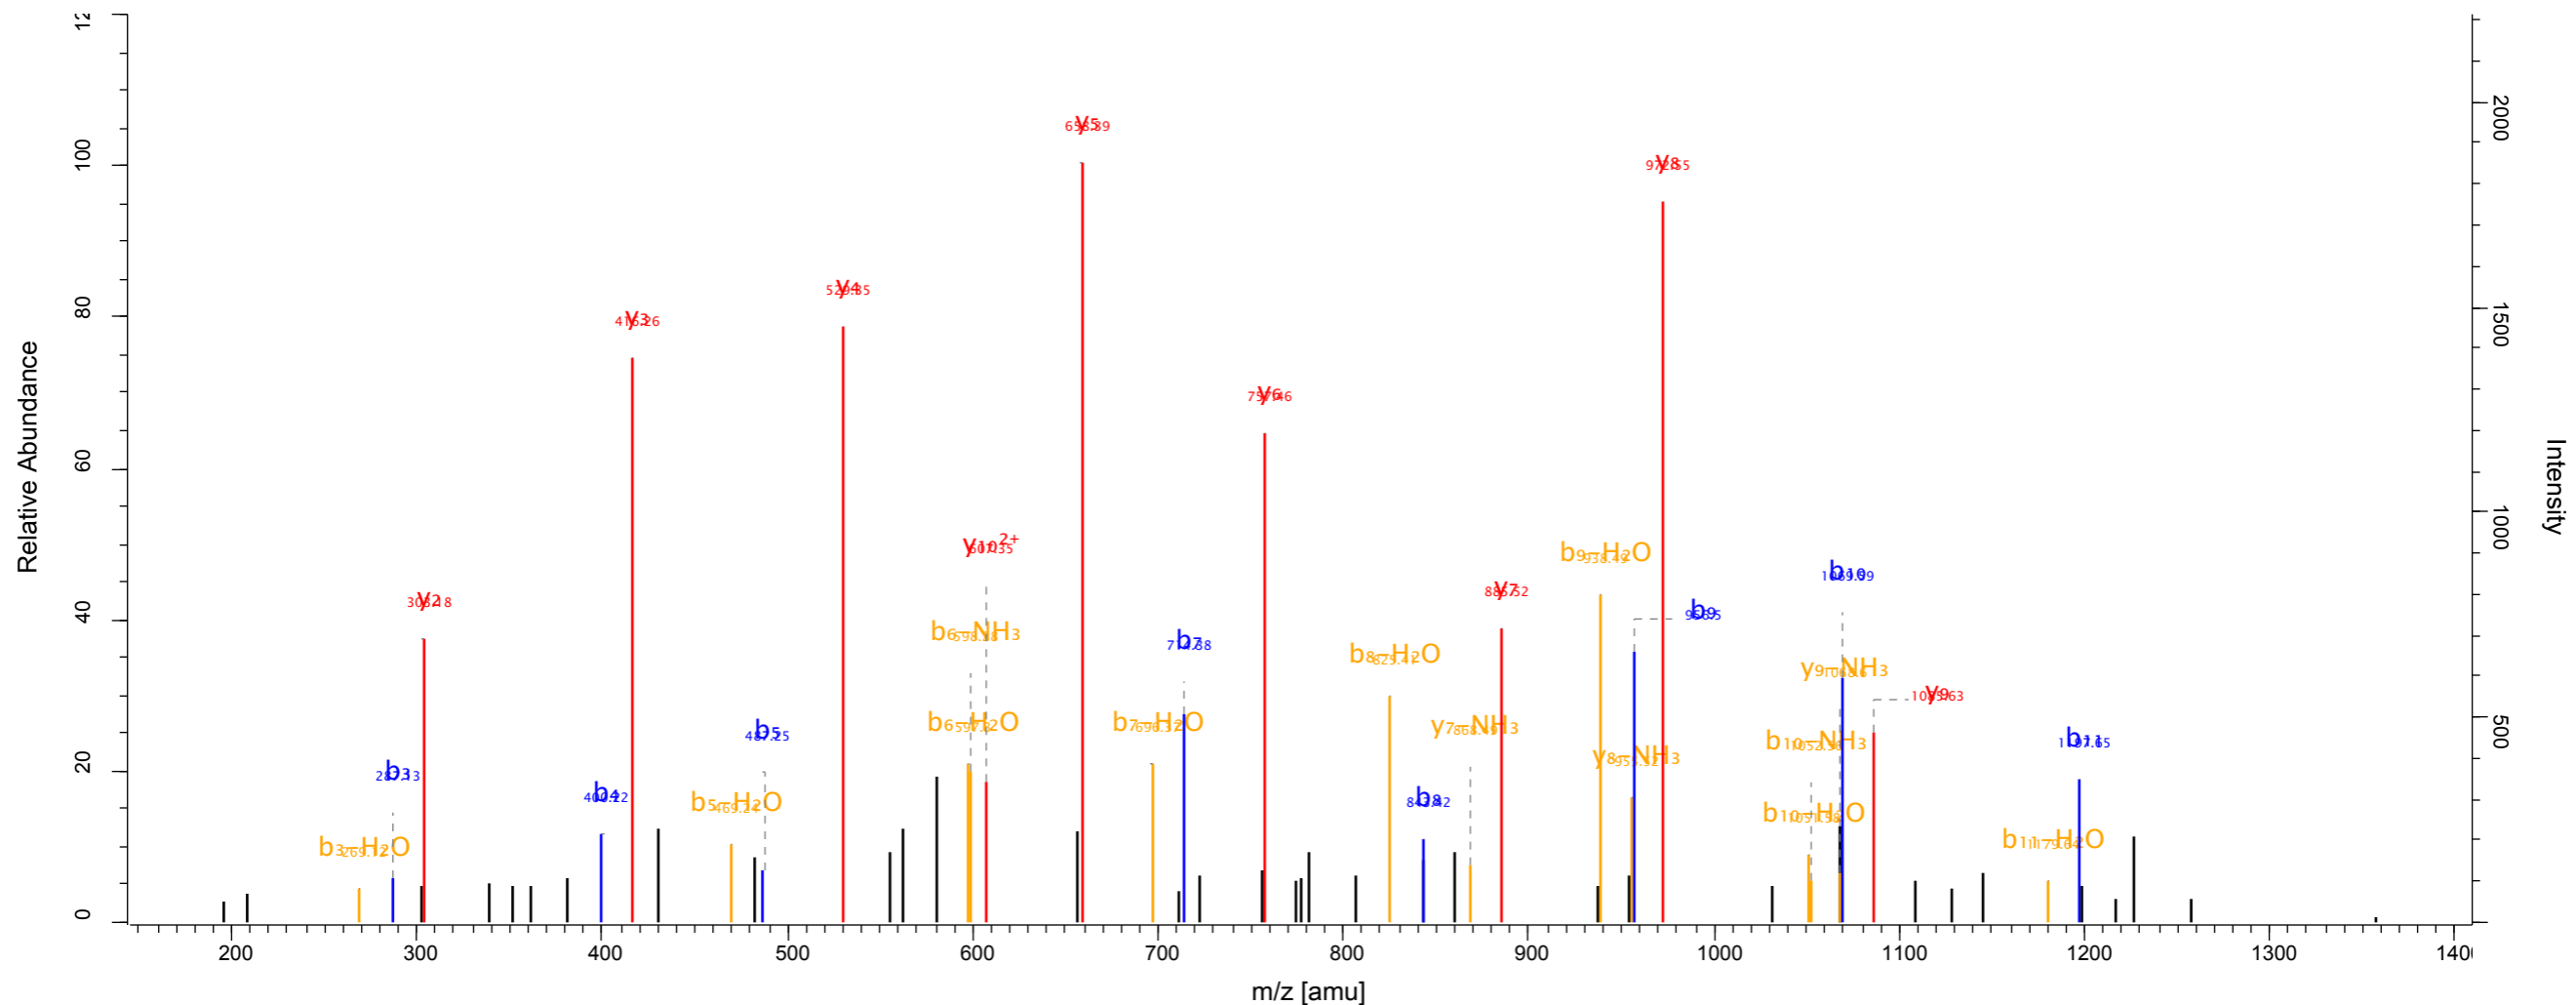

precursor information

|                   |                  |
|-------------------|------------------|
| Mass:             | 1370.75118       |
| m/z:              | 686.38286        |
| Charge:           | 2+               |
| Retentiontime:    | 80.0550020006004 |
| Score:            | 102.682          |
| Mass Error (ppm): | -0.43866         |
| PEP:              | 3.0063E-07       |
| Precursor Type:   | ISO              |

general information

|                       |           |
|-----------------------|-----------|
| Annotation:           | 0 of 12   |
| AminoAcids Coverage:  | 75 %      |
| Intensity Coverage:   | 70 %      |
| Peak Coverage:        | 47 %      |
| Protein Localisation: | 61 ... 72 |

| b ion      |                |    |     |    | y ion          |            | y <sup>2+</sup> ion |            |
|------------|----------------|----|-----|----|----------------|------------|---------------------|------------|
| Δ dalton   | mass           |    | seq |    | Δ dalton       | mass       | Δ dalton            | mass       |
|            | 58.02874019    | 1  | G   | 11 |                |            |                     |            |
|            | 159.076418664  | 2  | T   | 10 | 1314.737590553 |            | 1314.737590553      |            |
| -0.0246446 | 287.134996176  | 3  | Q   | 9  | 1213.689912079 |            | 607.348594273       | +0.2079853 |
| -0.1737721 | 400.219060156  | 4  | I   | 8  | 1085.631334567 | -0.0668814 | 1085.631334567      |            |
| -0.1573996 | 487.251088566  | 5  | S   | 7  | 972.547270587  | -0.0033863 | 972.547270587       |            |
|            | 615.309666077  | 6  | Q   | 6  | 885.515242177  | +0.1073164 | 885.515242177       |            |
| +0.0147423 | 714.378079994  | 7  | V   | 5  | 757.456664666  | +0.1655888 | 757.456664666       |            |
| +0.0992854 | 843.42067309   | 8  | E   | 4  | 658.388250749  | +0.1743103 | 658.388250749       |            |
| +0.2564324 | 956.50473707   | 9  | I   | 3  | 529.345657653  | +0.0979459 | 529.345657653       |            |
| +0.0933279 | 1069.588801051 | 10 | I   | 2  | 416.261593673  | +0.1626617 | 416.261593673       |            |
| -0.0267731 | 1197.647378562 | 11 | Q   | 1  | 303.177529692  | +0.10488   | 303.177529692       |            |
|            |                | 12 | R   | 0  | 175.118952181  |            | 175.118952181       |            |

Scan number 5111 Raw file 20080627\_Orbi4\_SaZa\_ADH\_Matrigel\_Exp2\_BSA\_InGel\_01  
 Method ITMS; CID Genenames RNASE4

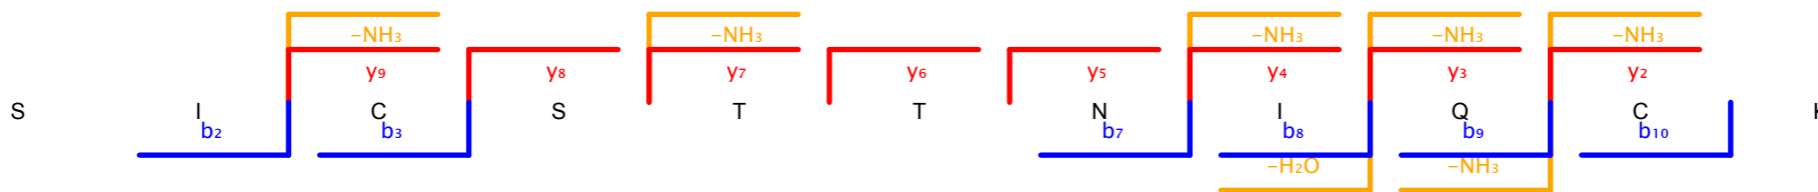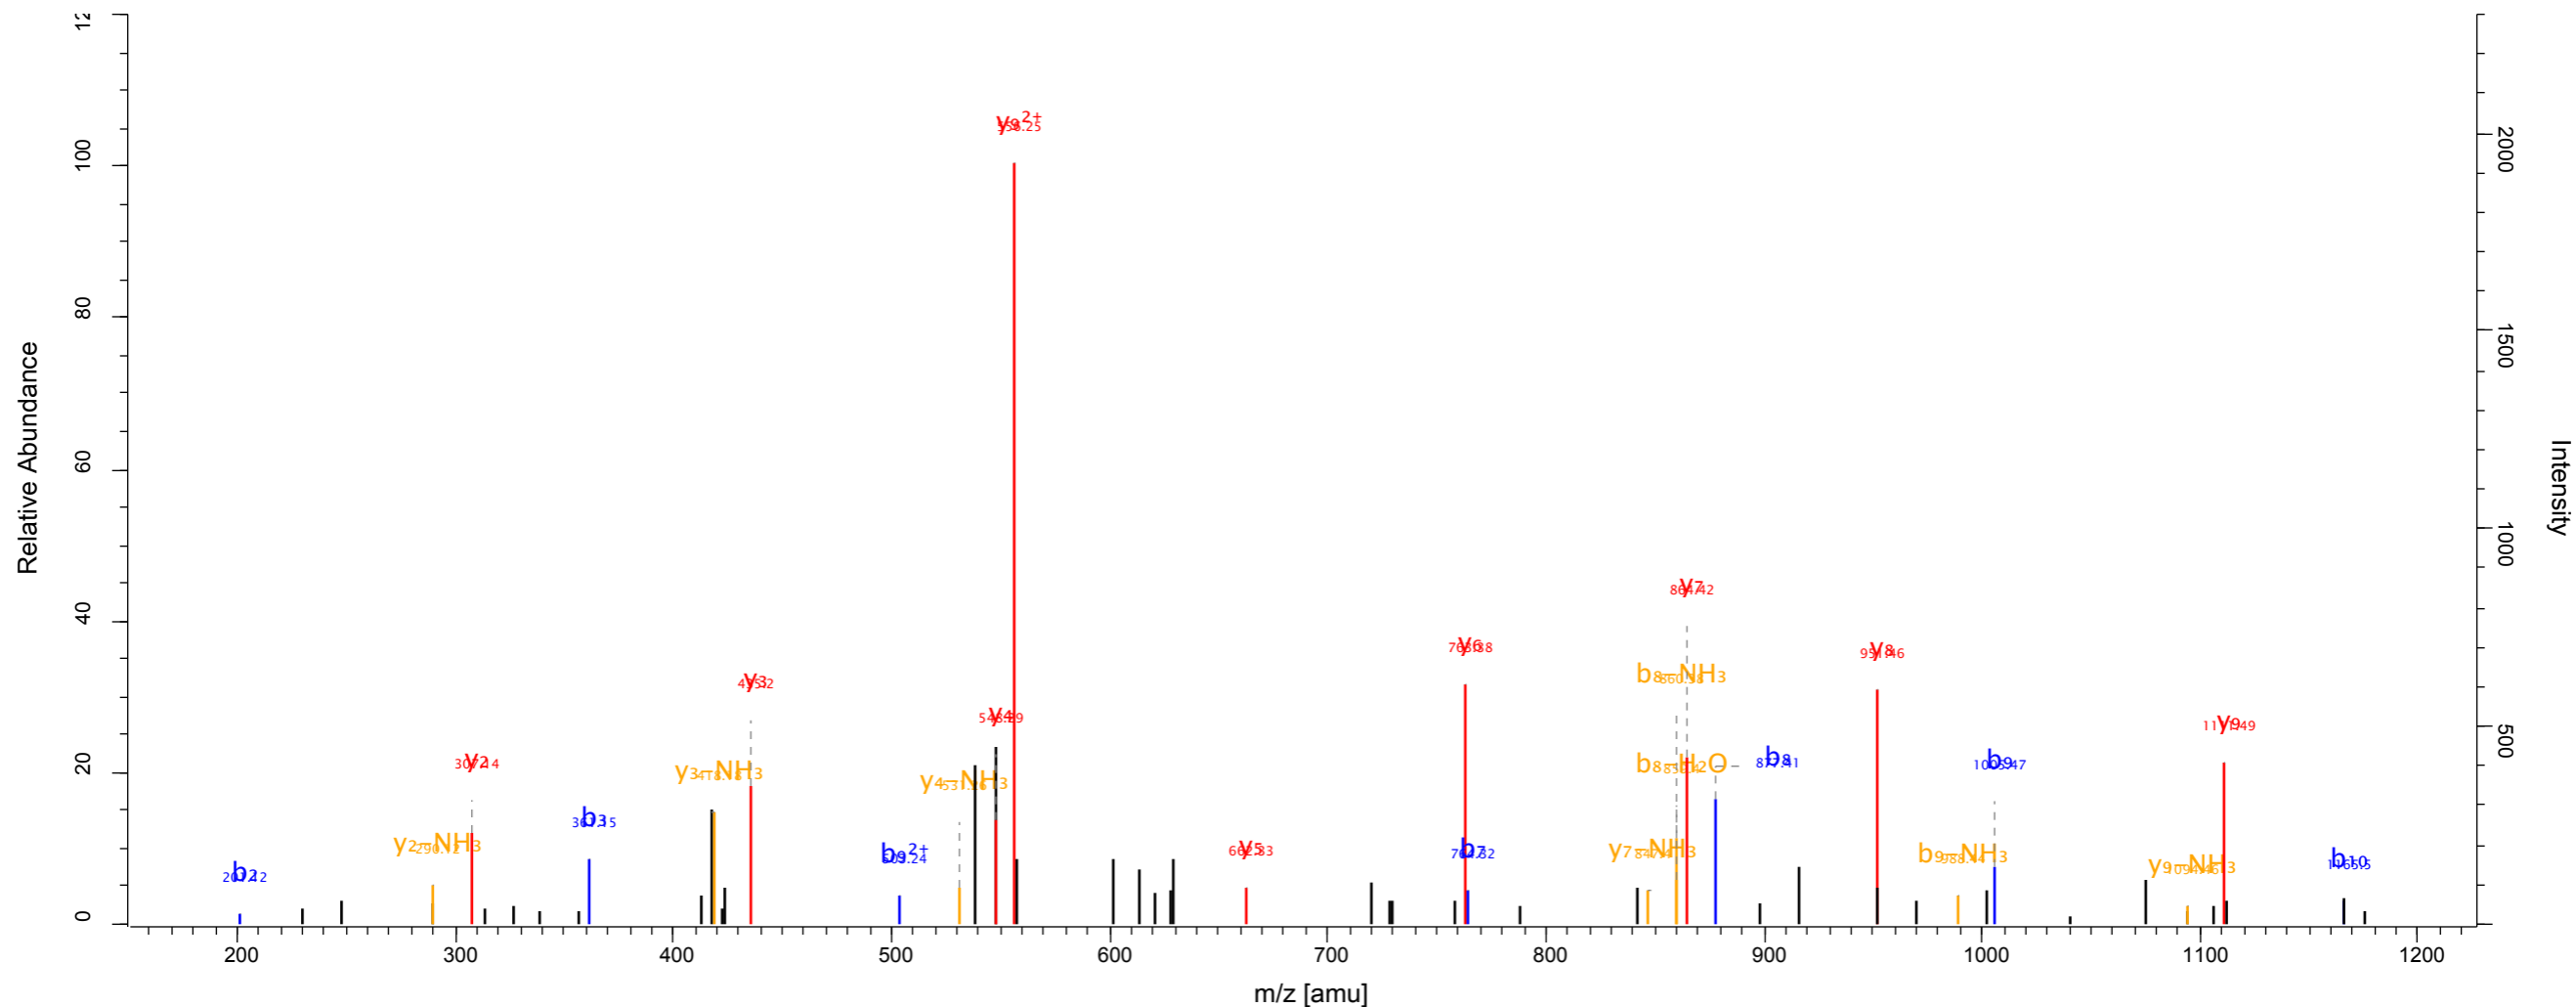

precursor information

|                   |                  |
|-------------------|------------------|
| Mass:             | 1210.59600       |
| m/z:              | 656.30532        |
| Charge:           | 2+               |
| Retention time:   | 51.0402416381836 |
| Score:            | 164.3340         |
| Mass Error (ppm): | 0.16054          |
| PEP:              | 0.00010507       |
| Precursor Type:   | ISO              |

general information

|                       |           |
|-----------------------|-----------|
| Annotation:           | 9 of 11   |
| AminoAcids Coverage:  | 82 %      |
| Intensity Coverage:   | 65 %      |
| Peak Coverage:        | 30 %      |
| Protein Localisation: | 83 ... 93 |

| b <sup>2+</sup> ion |              | b ion      |              |    |     |    | y ion        |            | y <sup>2+</sup> ion |            |
|---------------------|--------------|------------|--------------|----|-----|----|--------------|------------|---------------------|------------|
| Δ dalton            | mass         | Δ dalton   | mass         |    | seq |    | Δ dalton     | mass       | Δ dalton            | mass       |
|                     | 88.039304876 |            | 88.039304876 | 1  | S   | 10 |              |            |                     |            |
|                     | 201.12336886 | -0.0556809 | 201.12336886 | 2  | I   | 9  | 1224.5711189 |            | 1224.5711189        |            |
|                     | 361.15401706 | +0.0574087 | 361.15401706 | 3  | C   | 8  | 1111.4870549 | -0.011591  | 556.24716567        | +0.0337792 |
|                     | 448.18604547 |            | 448.18604547 | 4  | S   | 7  | 951.45640667 | +0.0667867 | 951.45640667        |            |
|                     | 549.23372394 |            | 549.23372394 | 5  | T   | 6  | 864.42437826 | +0.0885002 | 864.42437826        |            |
|                     | 650.28140242 |            | 650.28140242 | 6  | T   | 5  | 763.37669979 | +0.0242402 | 763.37669979        |            |
|                     | 764.32432986 | +0.0526843 | 764.32432986 | 7  | N   | 4  | 662.32902131 | +0.0559274 | 662.32902131        |            |
|                     | 877.40839384 | +0.0002976 | 877.40839384 | 8  | I   | 3  | 548.28609386 | +0.1314476 | 548.28609386        |            |
| +0.1214576          | 503.23712391 | +0.0053797 | 1005.4669714 | 9  | Q   | 2  | 435.20202988 | +0.0250209 | 435.20202988        |            |
|                     | 1165.4976196 | +0.0989381 | 1165.4976196 | 10 | C   | 1  | 307.14345237 | +0.0525925 | 307.14345237        |            |
|                     |              |            |              | 11 | K   | 0  | 147.11280417 |            | 147.11280417        |            |

Scan number 11415 Raw file 20080705\_Orbi6\_SaZa\_ADH\_Exp\_2\_Matrigel\_30h\_InGel\_01  
 Method ITMS; CID Genenames KRTCAP2

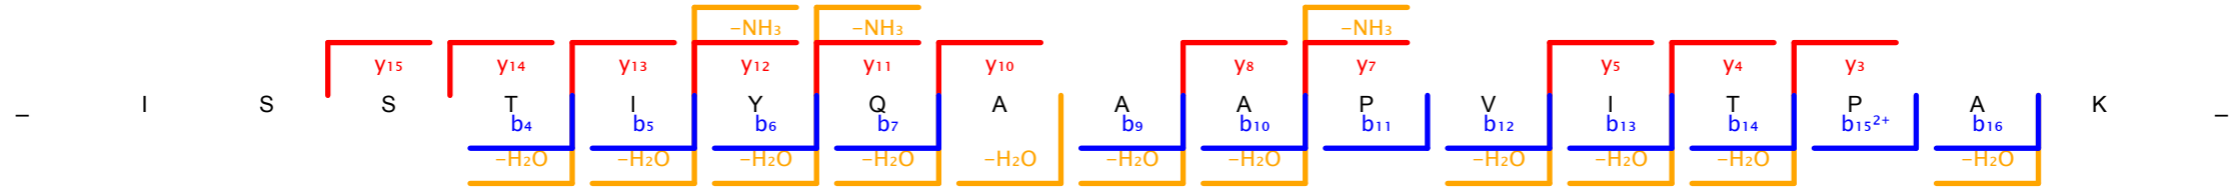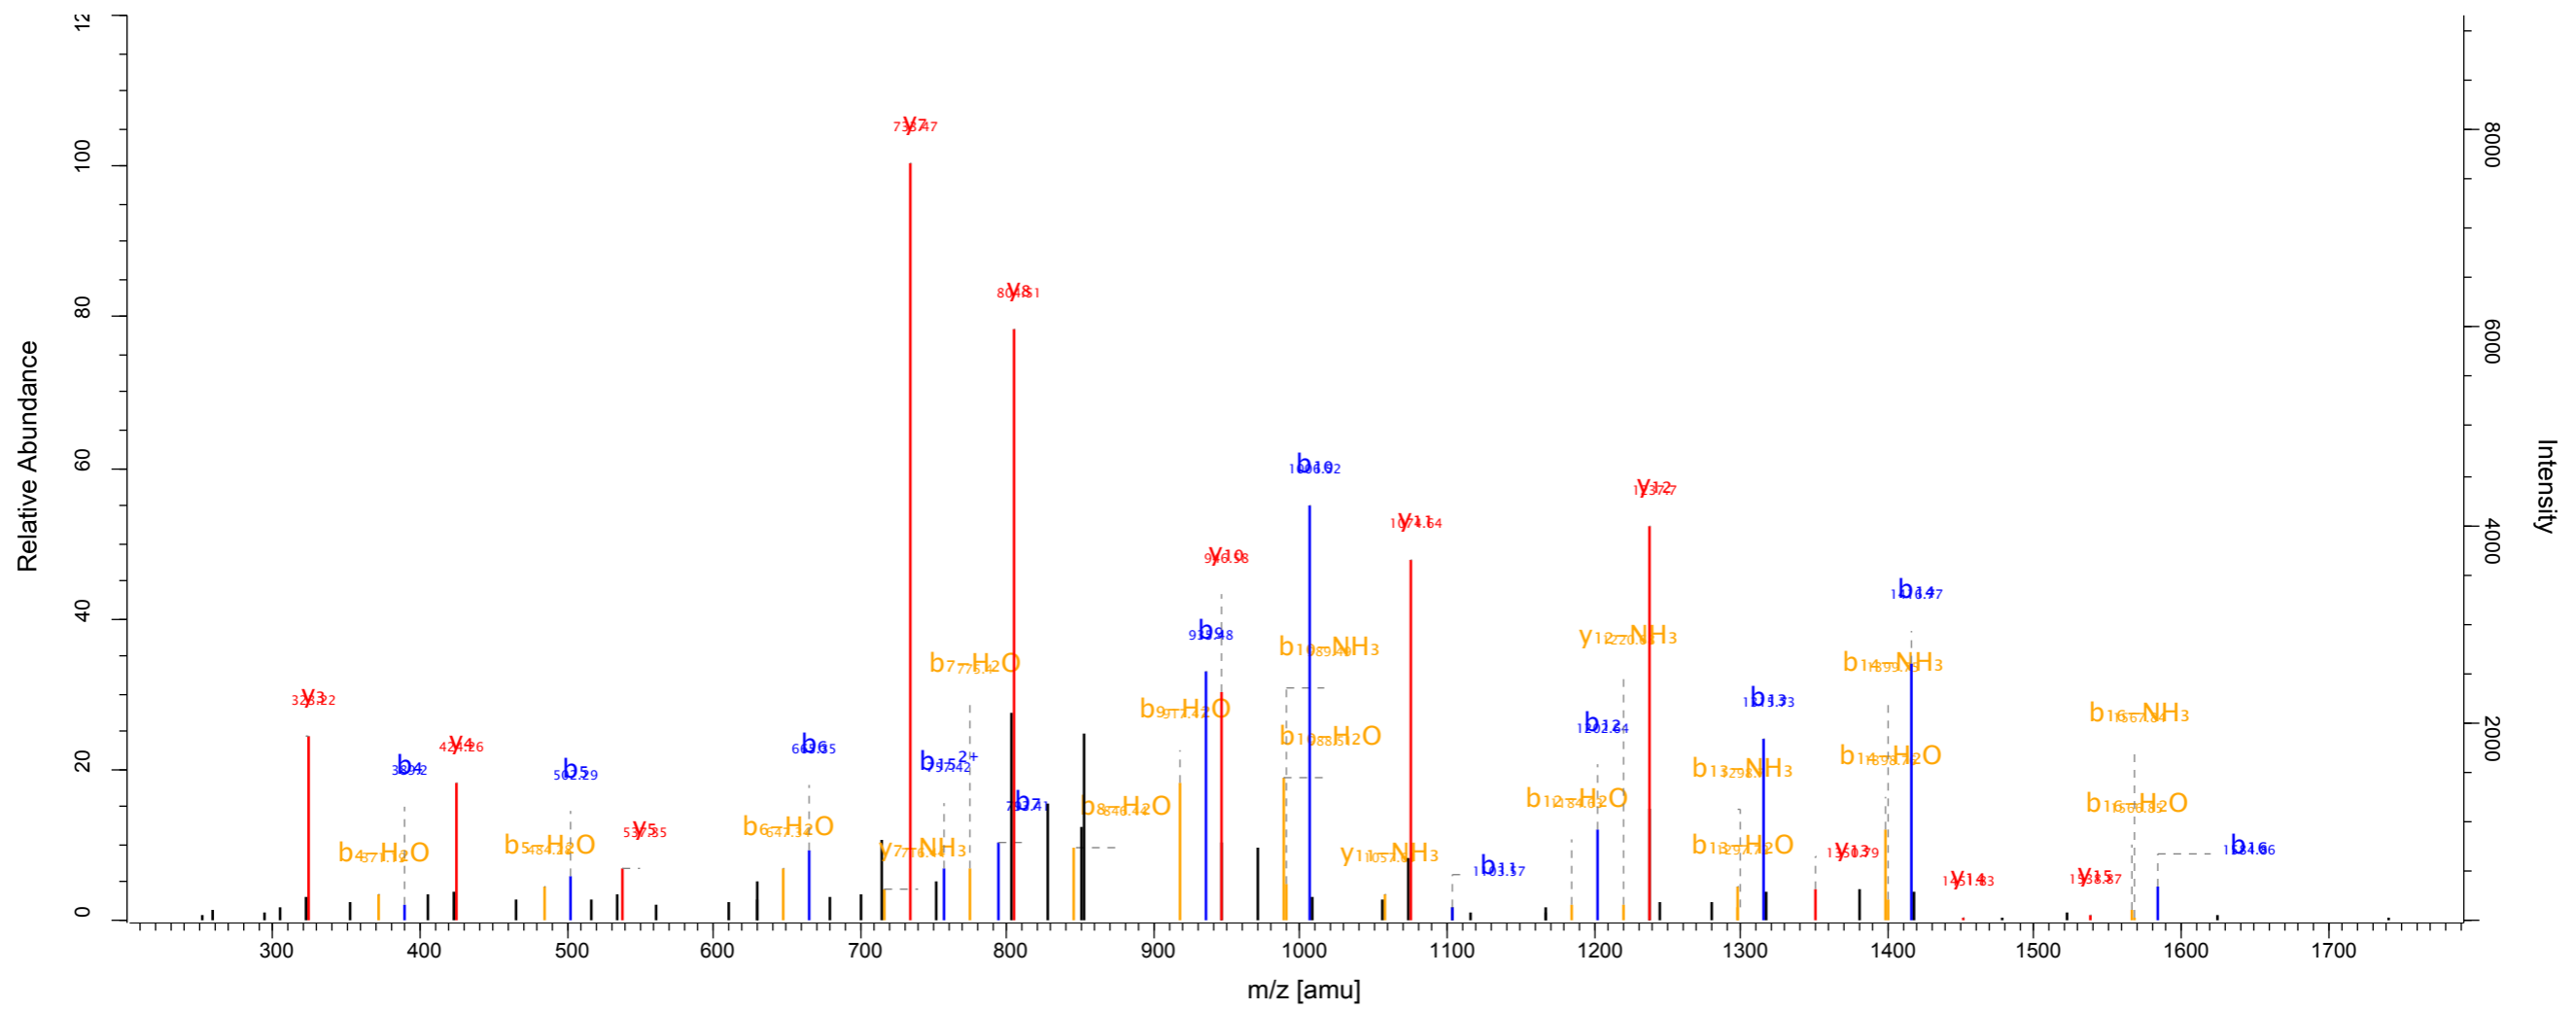

precursor information

|                   |                  |
|-------------------|------------------|
| Mass:             | 1720.06154       |
| m/z:              | 865.08805        |
| Charge:           | 2+               |
| Retention time:   | 82.4458465576172 |
| Score:            | 258.4147         |
| Mass Error [ppm]: | 0.058472         |
| DEP:              | 1.6418E-88       |
| Precursor Type:   | MULTI            |

| b <sup>2+</sup> ion |                | b ion      |                |     | y ion |          |                |            |
|---------------------|----------------|------------|----------------|-----|-------|----------|----------------|------------|
| Δ dalton            | mass           | Δ dalton   | mass           | seq |       | Δ dalton | mass           |            |
|                     | 114.091340447  |            | 114.091340447  | 1   | I     | 16       |                |            |
|                     | 201.123368857  |            | 201.123368857  | 2   | S     | 15       | 1625.898847534 |            |
|                     | 288.155397267  |            | 288.155397267  | 3   | S     | 14       | 1538.866819124 | -0.0324685 |
|                     | 389.203075741  | -0.0228084 | 389.203075741  | 4   | T     | 13       | 1451.834790714 | -0.1476569 |
|                     | 502.287139721  | -0.0444639 | 502.287139721  | 5   | I     | 12       | 1350.78711224  | -0.0457792 |
|                     | 665.35046826   | -0.0995527 | 665.35046826   | 6   | Y     | 11       | 1237.703048259 | -0.0279994 |
|                     | 793.409045771  | -0.0667606 | 793.409045771  | 7   | Q     | 10       | 1074.639719721 | -0.0652568 |
|                     | 864.446159559  |            | 864.446159559  | 8   | A     | 9        | 946.58114221   | +0.0089457 |
|                     | 935.483273347  | -0.2027558 | 935.483273347  | 9   | A     | 8        | 875.544028422  |            |
|                     | 1006.520387134 | -0.1813368 | 1006.520387134 | 10  | A     | 7        | 804.506914634  | -0.0553765 |
|                     | 1103.573150986 | +0.4604183 | 1103.573150986 | 11  | P     | 6        | 733.469800846  | -0.154127  |
|                     | 1202.641564903 | -0.1869751 | 1202.641564903 | 12  | V     | 5        | 636.417036994  |            |
|                     | 1315.725628883 | -0.2229433 | 1315.725628883 | 13  | I     | 4        | 537.348623078  | -0.0651148 |
|                     | 1416.773307357 | -0.1860271 | 1416.773307357 | 14  | T     | 3        | 424.264559098  | +0.1258218 |
| +0.039564           | 757.416673838  |            | 1513.826071209 | 15  | P     | 2        | 323.216880624  | +0.0206682 |
|                     | 1584.863184997 | -0.1631118 | 1584.863184997 | 16  | A     | 1        | 226.164116772  |            |
|                     |                |            |                | 17  | K     | 0        | 155.127002984  |            |

general information

|                       |             |
|-----------------------|-------------|
| Annotation:           | 14 of 17    |
| AminoAcids Coverage:  | 82 %        |
| Intensity Coverage:   | 76 %        |
| Peak Coverage:        | 40 %        |
| Protein Localisation: | 137 ... 153 |



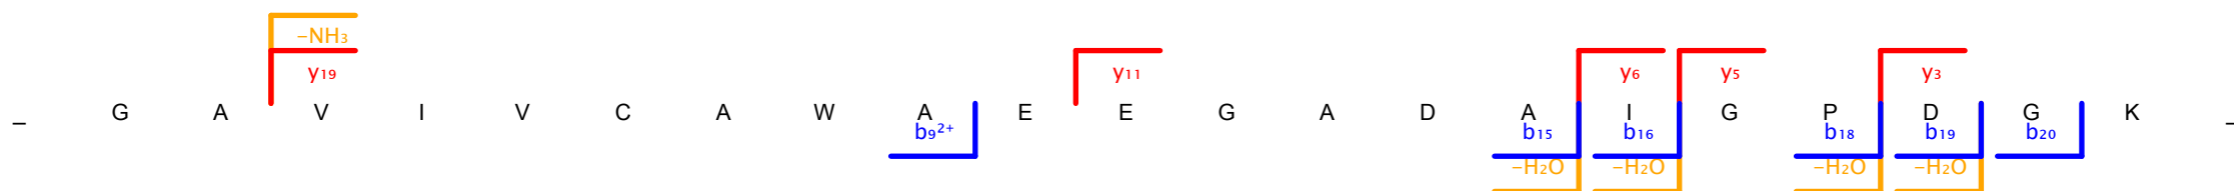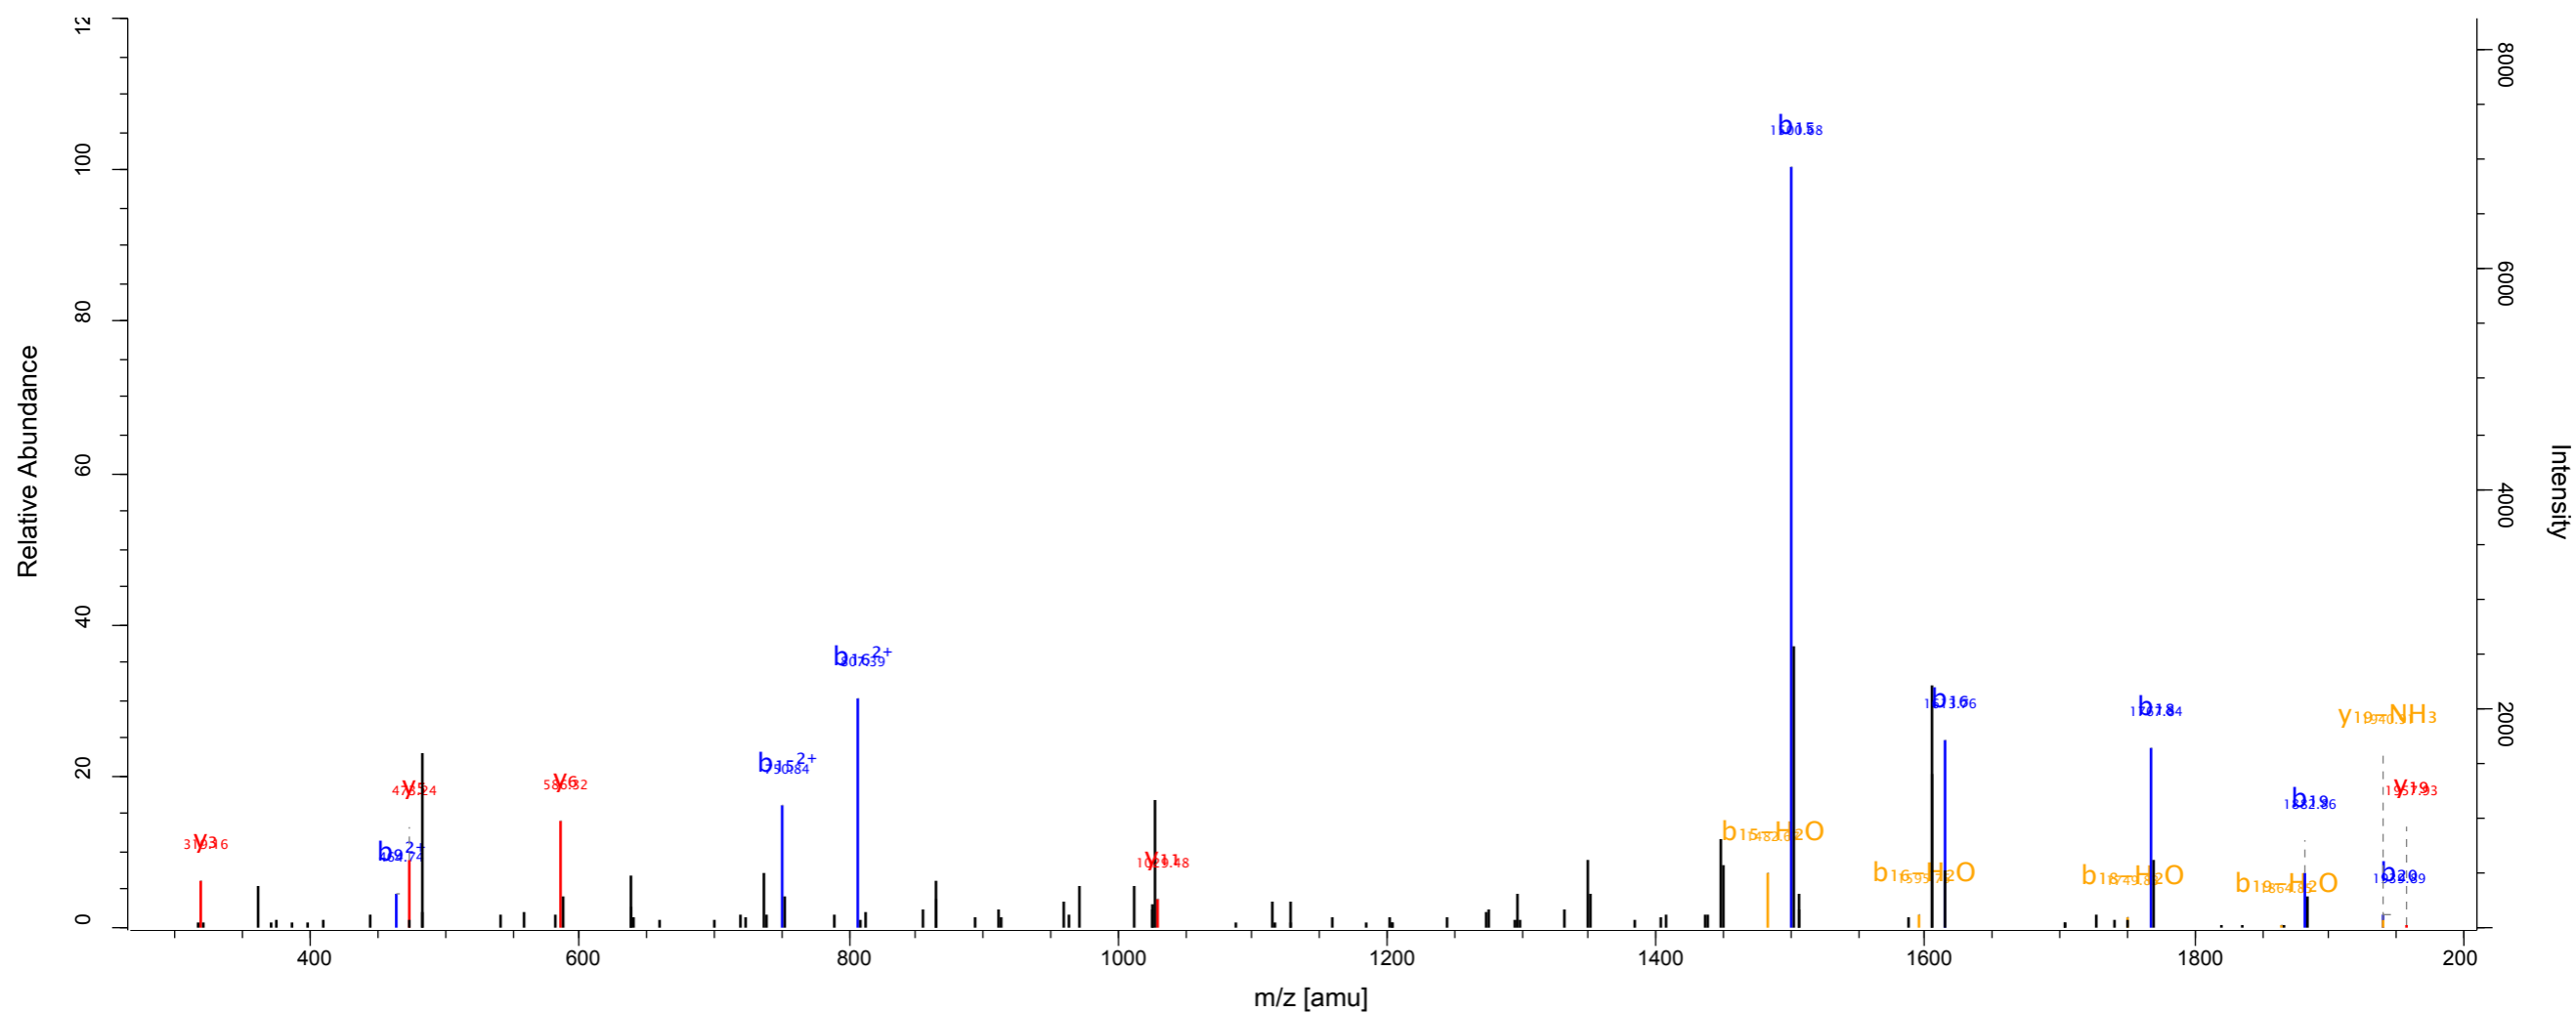

precursor information

|                   |                  |
|-------------------|------------------|
| Mass:             | 2024.08426       |
| m/z:              | 1042.40046       |
| Charge:           | 2+               |
| Retention time:   | 00.8215102140414 |
| Score:            | 78.22442         |
| Mass Error [ppm]: | 0.21625          |
| DEP:              | 0.00010578       |
| Precursor Type:   | MULTI            |

| b <sup>2+</sup> ion |                | b ion      |                |     | y ion |          |                |            |
|---------------------|----------------|------------|----------------|-----|-------|----------|----------------|------------|
| Δ dalton            | mass           | Δ dalton   | mass           | seq |       | Δ dalton | mass           |            |
|                     | 58.02874019    |            | 58.02874019    | 1   | G     | 20       |                |            |
|                     | 129.065853978  |            | 129.065853978  | 2   | A     | 19       | 2028.969517337 |            |
|                     | 228.134267894  |            | 228.134267894  | 3   | V     | 18       | 1957.932403549 | -0.0902405 |
|                     | 341.218331875  |            | 341.218331875  | 4   | I     | 17       | 1858.863989633 |            |
|                     | 440.286745791  |            | 440.286745791  | 5   | V     | 16       | 1745.779925652 |            |
|                     | 600.317393992  |            | 600.317393992  | 6   | C     | 15       | 1646.711511736 |            |
|                     | 671.35450778   |            | 671.35450778   | 7   | A     | 14       | 1486.680863535 |            |
|                     | 857.433820734  |            | 857.433820734  | 8   | W     | 13       | 1415.643749747 |            |
| -0.4633487          | 464.739105494  |            | 928.470934521  | 9   | A     | 12       | 1229.564436794 |            |
|                     | 1057.513527617 |            | 1057.513527617 | 10  | E     | 11       | 1158.527323006 |            |
|                     | 1186.556120714 |            | 1186.556120714 | 11  | E     | 10       | 1029.48472991  | -0.0129282 |
|                     | 1243.577584437 |            | 1243.577584437 | 12  | G     | 9        | 900.442136813  |            |
|                     | 1314.614698225 |            | 1314.614698225 | 13  | A     | 8        | 843.42067309   |            |
|                     | 1429.641641257 |            | 1429.641641257 | 14  | D     | 7        | 772.383559302  |            |
| +0.000246           | 750.843015756  | -0.1811965 | 1500.678755045 | 15  | A     | 6        | 657.35661627   |            |
| +0.0722276          | 807.385047746  | -0.1647966 | 1613.762819025 | 16  | I     | 5        | 586.319502482  | -0.0433794 |
|                     | 1670.784282749 |            | 1670.784282749 | 17  | G     | 4        | 473.235438502  | -0.1845962 |
|                     | 1767.837046601 | -0.1991071 | 1767.837046601 | 18  | P     | 3        | 416.213974778  |            |
|                     | 1882.863989633 | -0.2388676 | 1882.863989633 | 19  | D     | 2        | 319.161210926  | -0.0508288 |
|                     | 1939.885453356 | -0.2613078 | 1939.885453356 | 20  | G     | 1        | 204.134267894  |            |
|                     |                |            |                | 21  | K     | 0        | 147.112804171  |            |

general information

|                       |             |
|-----------------------|-------------|
| Annotation:           | 0 of 21     |
| AminoAcids Coverage:  | 42 %        |
| Intensity Coverage:   | 42 %        |
| Peak Coverage:        | 17 %        |
| Protein Localisation: | 218 ... 238 |

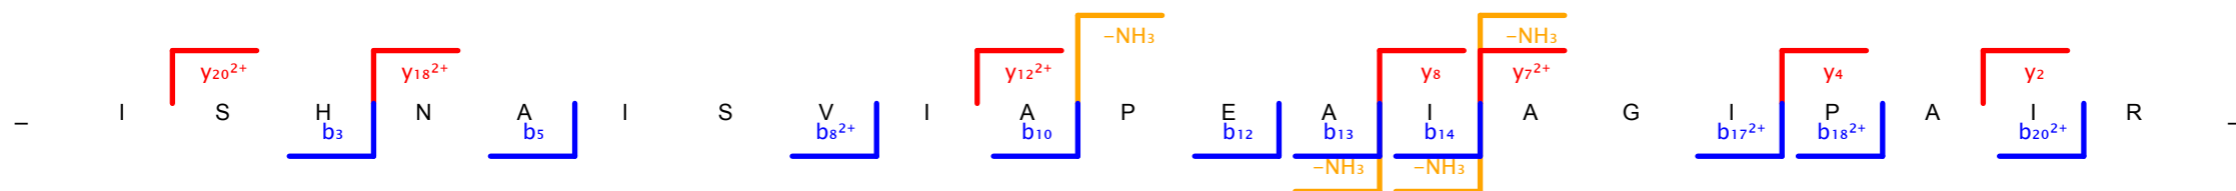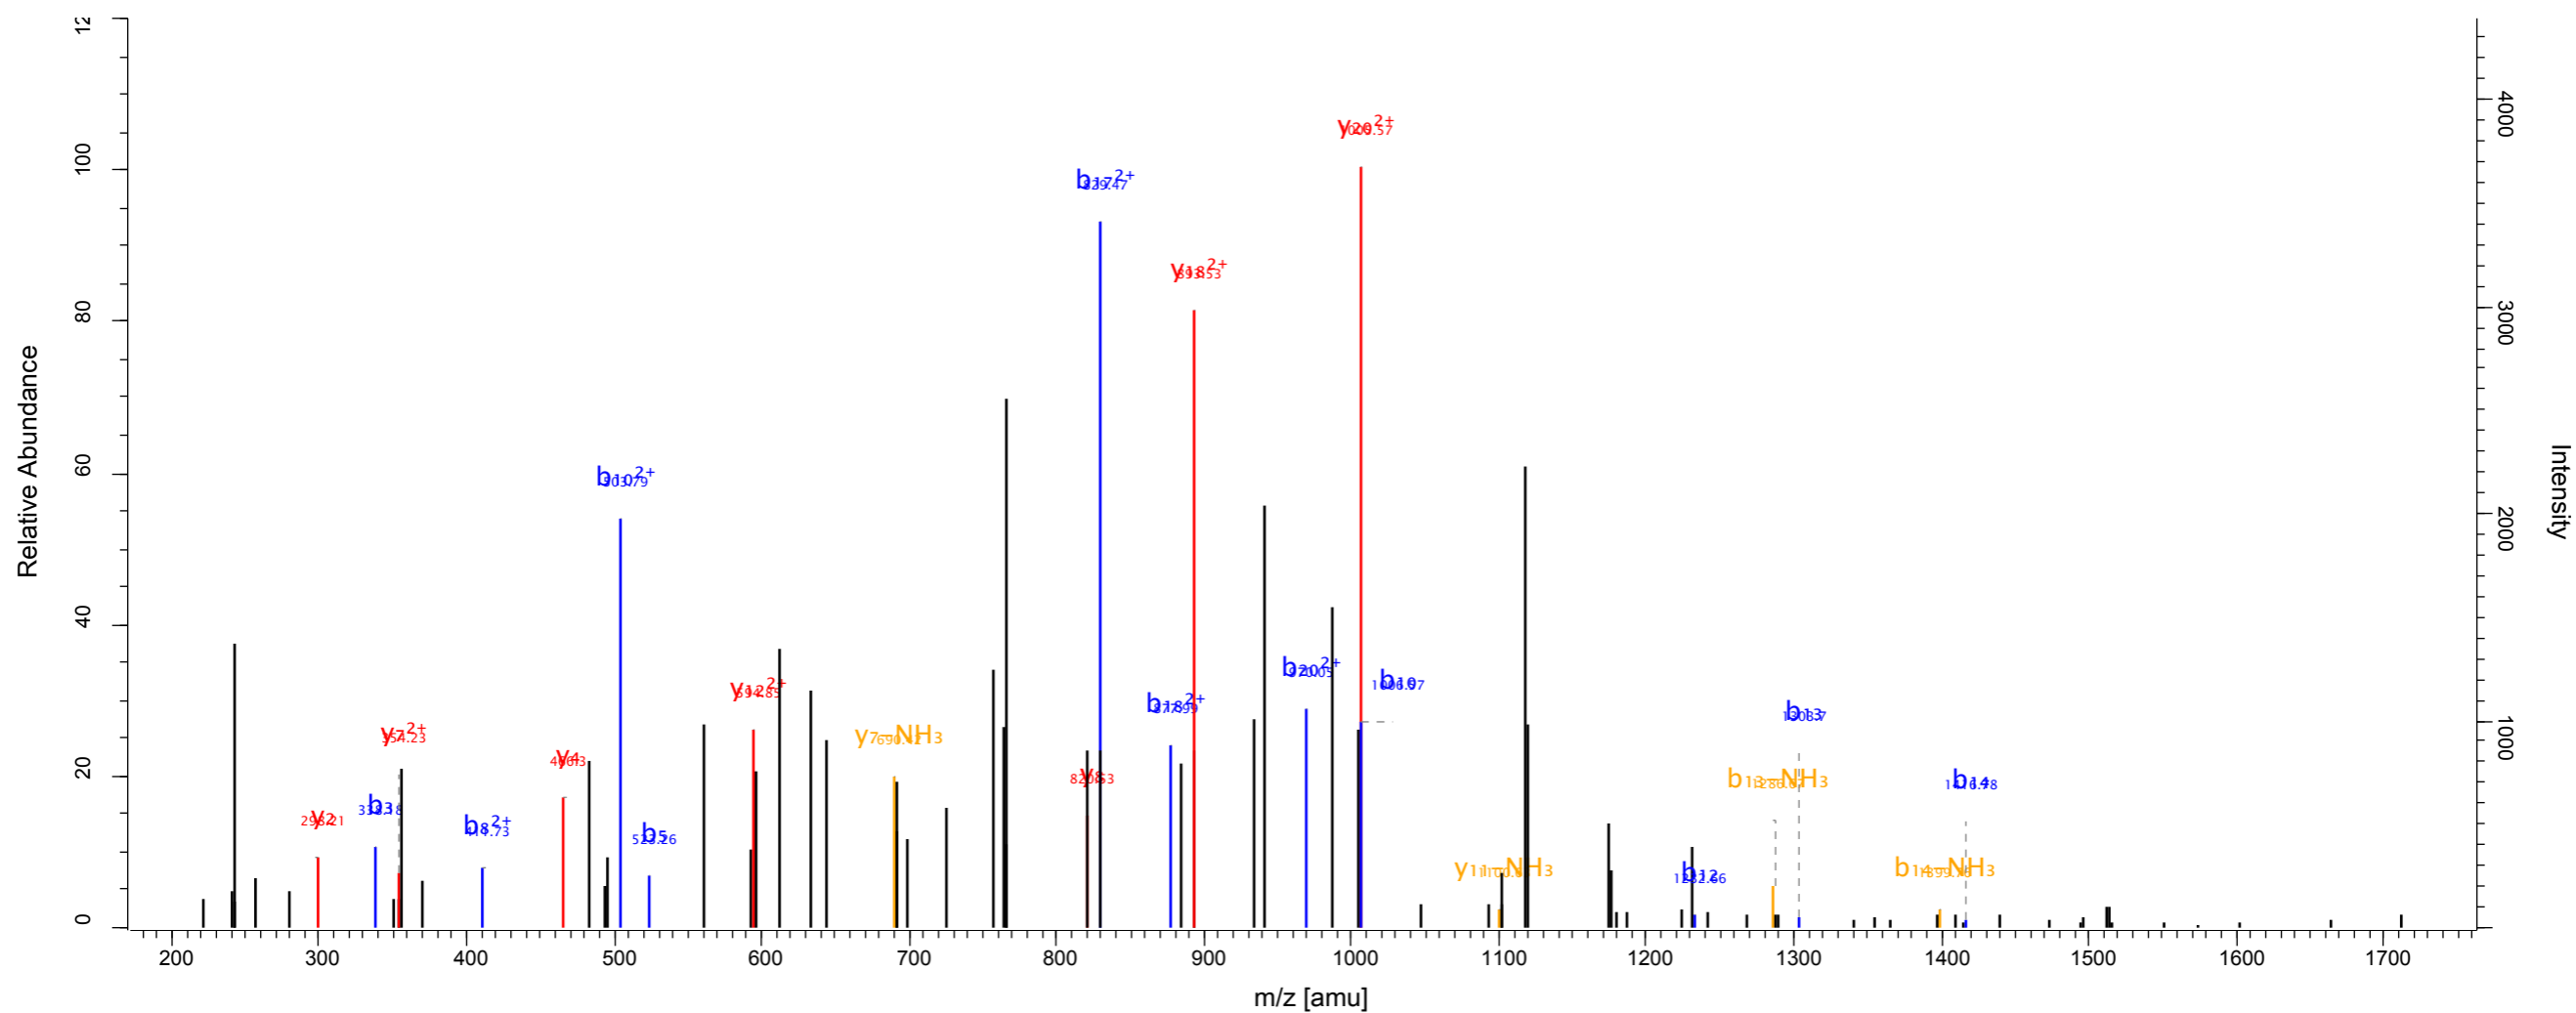

precursor information

|                   |                  |
|-------------------|------------------|
| Mass:             | 2112.20576       |
| m/z:              | 705.07586        |
| Charge:           | 2                |
| Retention time:   | 122.002517700105 |
| Score:            | 82.40427         |
| Mass Error (ppm): | 0.1116           |
| DEP:              | 6.6756E-05       |
| Precursor Type:   | MULTI            |

| b <sup>2+</sup> ion |              | b ion      |              |    |     |    | y ion        |            | y <sup>2+</sup> ion |            |
|---------------------|--------------|------------|--------------|----|-----|----|--------------|------------|---------------------|------------|
| Δ dalton            | mass         | Δ dalton   | mass         |    | seq |    | Δ dalton     | mass       | Δ dalton            | mass       |
|                     | 114.09134045 |            | 114.09134045 | 1  | I   | 20 |              |            |                     |            |
|                     | 201.12336886 |            | 201.12336886 | 2  | S   | 19 | 2010.1370042 |            | 1005.5721403        | +0.0319246 |
|                     | 338.18228072 | -0.0016777 | 338.18228072 | 3  | H   | 18 | 1923.1049758 |            | 1923.1049758        |            |
|                     | 452.22520817 |            | 452.22520817 | 4  | N   | 17 | 1786.0460639 |            | 893.52667019        | +0.1447165 |
|                     | 523.26232195 | -0.0700612 | 523.26232195 | 5  | A   | 16 | 1672.0031365 |            | 1672.0031365        |            |
|                     | 636.34638593 |            | 636.34638593 | 6  | I   | 15 | 1600.9660227 |            | 1600.9660227        |            |
|                     | 723.37841434 |            | 723.37841434 | 7  | S   | 14 | 1487.8819587 |            | 1487.8819587        |            |
| -0.3780533          | 411.72705236 |            | 822.44682826 | 8  | V   | 13 | 1400.8499303 |            | 1400.8499303        |            |
|                     | 935.53089224 |            | 935.53089224 | 9  | I   | 12 | 1301.7815164 |            | 1301.7815164        |            |
| -0.3321969          | 503.78764125 | +0.0216546 | 1006.568006  | 10 | A   | 11 | 1188.6974524 |            | 594.85236443        | -0.4564294 |
|                     | 1103.6207699 |            | 1103.6207699 | 11 | P   | 10 | 1117.6603386 |            | 1117.6603386        |            |
|                     | 1232.663363  | -0.180697  | 1232.663363  | 12 | E   | 9  | 1020.6075748 |            | 1020.6075748        |            |
|                     | 1303.7004768 | +0.1680535 | 1303.7004768 | 13 | A   | 8  | 891.56498166 |            | 891.56498166        |            |
|                     | 1416.7845407 | -0.2011667 | 1416.7845407 | 14 | I   | 7  | 820.52786787 | -0.3479973 | 820.52786787        |            |
|                     | 1487.8216545 |            | 1487.8216545 | 15 | A   | 6  | 707.44380389 |            | 354.22554018        | +0.0214996 |
|                     | 1544.8431183 |            | 1544.8431183 | 16 | G   | 5  | 636.4066901  |            | 636.4066901         |            |
| -0.1049857          | 829.46722935 |            | 1657.9271822 | 17 | I   | 4  | 579.38522638 |            | 579.38522638        |            |
| -0.4680375          | 877.99361128 |            | 1754.9799461 | 18 | P   | 3  | 466.3011624  | -0.0932767 | 466.3011624         |            |
|                     | 1826.0170599 |            | 1826.0170599 | 19 | A   | 2  | 369.24839855 |            | 369.24839855        |            |
| +0.0886221          | 970.05420016 |            | 1939.1011239 | 20 | I   | 1  | 298.21128476 | +0.0745734 | 298.21128476        |            |
|                     |              |            |              | 21 | R   | 0  | 185.12722078 |            | 185.12722078        |            |

general information

|                       |             |
|-----------------------|-------------|
| Annotation:           | 14 of 21    |
| AminoAcids Coverage:  | 67%         |
| Intensity Coverage:   | 28%         |
| Peak Coverage:        | 24%         |
| Protein Localisation: | 189 ... 209 |

Scan number 18935 Raw file 20080705\_Orbi6\_SaZa\_ADH\_Exp\_2\_Matrigel\_30h\_InGel\_02  
 Method ITMS; CID Genenames CRCP

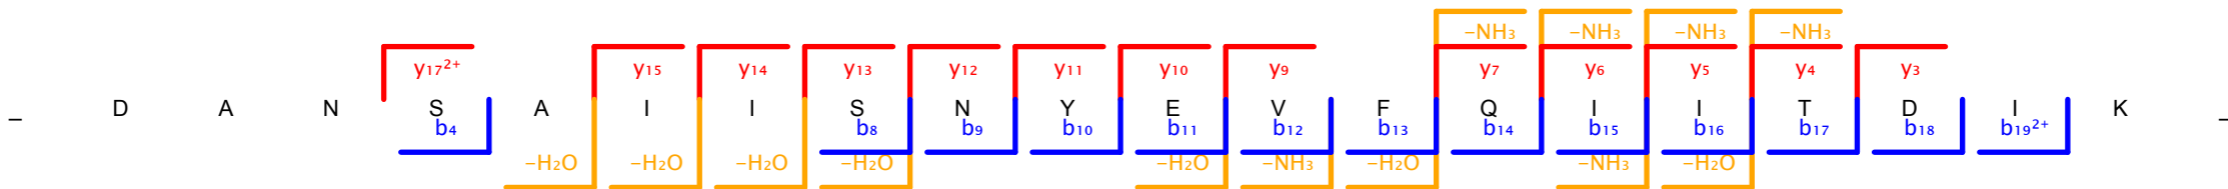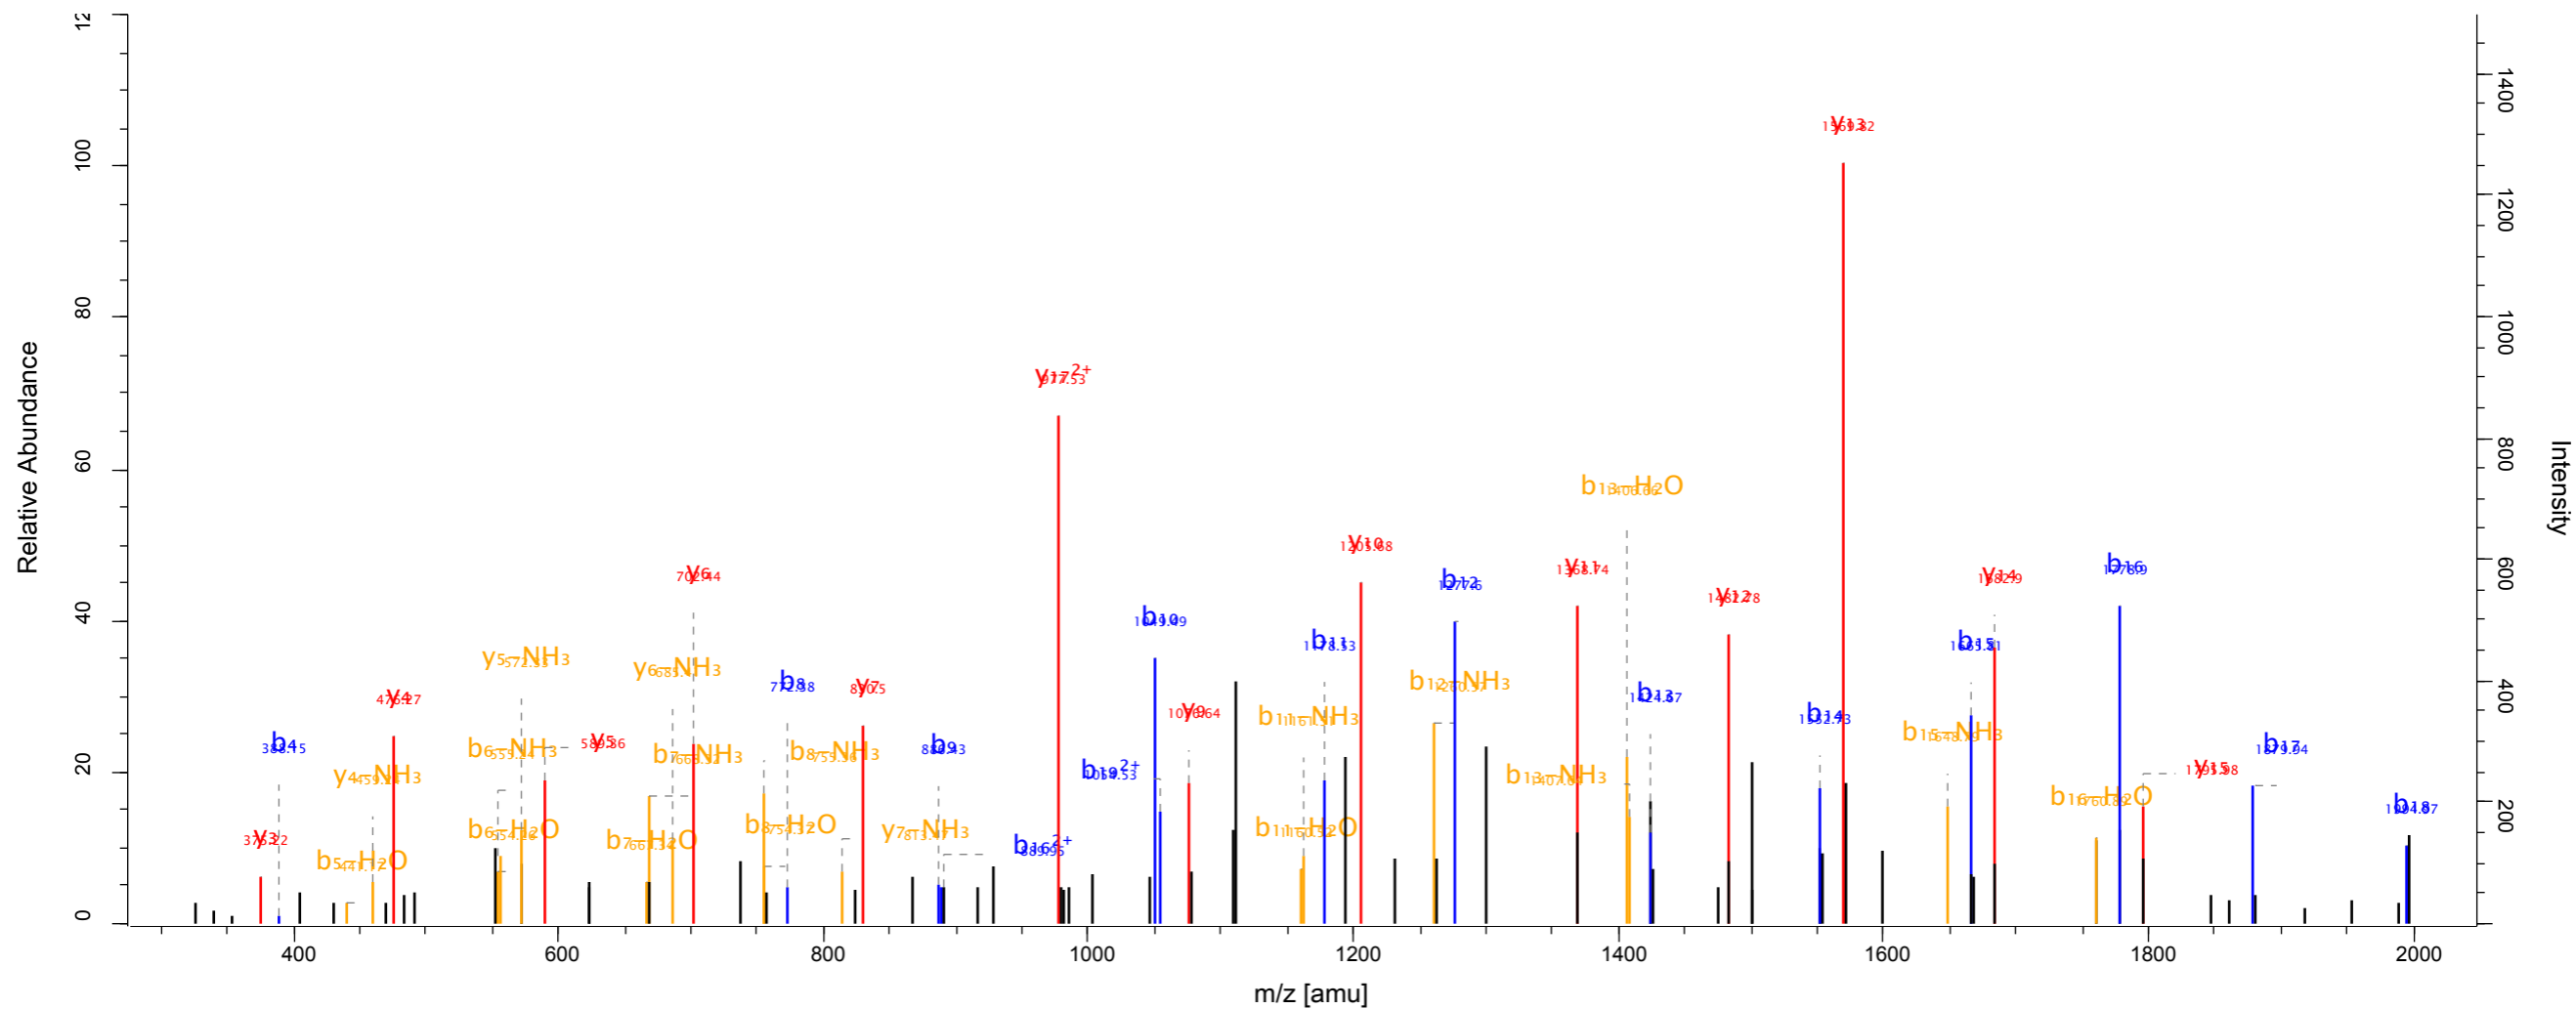

precursor information

|                   |                  |
|-------------------|------------------|
| Mass:             | 2252.15128       |
| m/z:              | 1127.58206       |
| Charge:           | 2                |
| Potenttime:       | 122.407080223208 |
| Score:            | 267.2642         |
| Mass Error (ppm): | -0.66712         |
| DEP:              | 4.04115_121      |
| Precursor Type:   | MULTI            |

| b <sup>2+</sup> ion |              | b ion      |              |     |   | y ion    |              | y <sup>2+</sup> ion |              |
|---------------------|--------------|------------|--------------|-----|---|----------|--------------|---------------------|--------------|
| Δ dalton            | mass         | Δ dalton   | mass         | seq |   | Δ dalton | mass         | Δ dalton            | mass         |
|                     | 116.0342195  |            | 116.0342195  | 1   | D | 19       |              |                     |              |
|                     | 187.07133329 |            | 187.07133329 | 2   | A | 18       | 2139.1332118 | 2139.1332118        |              |
|                     | 301.11426073 |            | 301.11426073 | 3   | N | 17       | 2068.0960981 | 2068.0960981        |              |
|                     | 388.14628914 | +0.0250976 | 388.14628914 | 4   | S | 16       | 1954.0531706 | 977.53022354        | -0.015453    |
|                     | 459.18340293 |            | 459.18340293 | 5   | A | 15       | 1867.0211422 | 1867.0211422        |              |
|                     | 572.26746691 |            | 572.26746691 | 6   | I | 14       | 1795.9840284 | -0.2741895          | 1795.9840284 |
|                     | 685.35153089 |            | 685.35153089 | 7   | I | 13       | 1682.8999644 | -0.0730601          | 1682.8999644 |
|                     | 772.3835593  | -0.2759543 | 772.3835593  | 8   | S | 12       | 1569.8159005 | -0.2344796          | 1569.8159005 |
|                     | 886.42648675 | +0.1240504 | 886.42648675 | 9   | N | 11       | 1482.783872  | -0.2459082          | 1482.783872  |
|                     | 1049.4898153 | -0.0626913 | 1049.4898153 | 10  | Y | 10       | 1368.7409446 | -0.0572288          | 1368.7409446 |
|                     | 1178.5324084 | -0.3745715 | 1178.5324084 | 11  | E | 9        | 1205.6776161 | -0.0943641          | 1205.6776161 |
|                     | 1277.6008223 | -0.2371748 | 1277.6008223 | 12  | V | 8        | 1076.635023  | -0.2390269          | 1076.635023  |
|                     | 1424.6692362 | -0.1598368 | 1424.6692362 | 13  | F | 7        | 977.56660905 |                     | 977.56660905 |
|                     | 1552.7278137 | -0.153717  | 1552.7278137 | 14  | Q | 6        | 830.49819513 | -0.0655779          | 830.49819513 |
|                     | 1665.8118777 | -0.3472781 | 1665.8118777 | 15  | I | 5        | 702.43961762 | +0.0301089          | 702.43961762 |
| -0.2100319          | 889.95160908 | -0.1817083 | 1778.8959417 | 16  | I | 4        | 589.35555364 | +0.0495977          | 589.35555364 |
|                     | 1879.9436202 | -0.3706221 | 1879.9436202 | 17  | T | 3        | 476.27148966 | +0.1331124          | 476.27148966 |
|                     | 1994.9705632 | -0.2612126 | 1994.9705632 | 18  | D | 2        | 375.22381118 | +0.0596361          | 375.22381118 |
| +0.0718314          | 1054.5309518 |            | 2108.0546272 | 19  | I | 1        | 260.19686815 |                     | 260.19686815 |
|                     |              |            |              | 20  | K | 0        | 147.11280417 |                     | 147.11280417 |

general information

|                       |          |
|-----------------------|----------|
| Annotation:           | 16 of 20 |
| AminoAcids Coverage:  | 80 %     |
| Intensity Coverage:   | 68 %     |
| Peak Coverage:        | 45 %     |
| Protein Localisation: | 5 ... 24 |

Scan number 19011 Raw file 20080705\_Orbi6\_SaZa\_ADH\_Exp\_2\_Matrigel\_30h\_InGel\_04  
 Method ITMS; CID Genenames NDFIP1

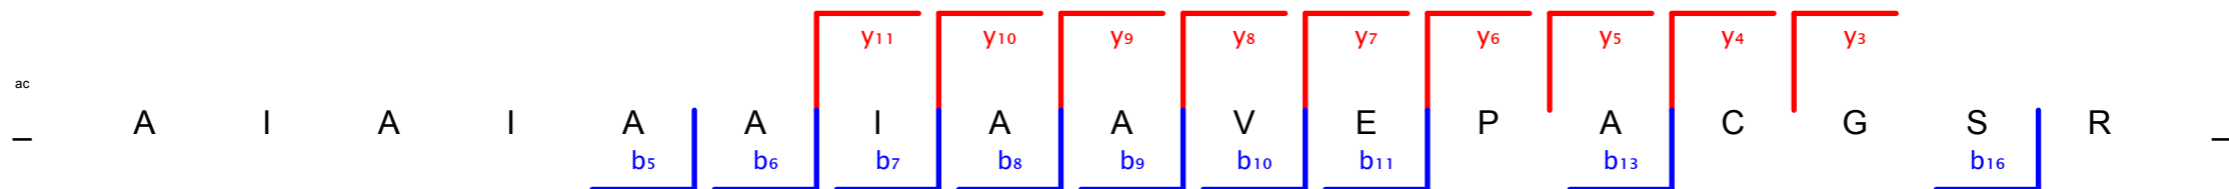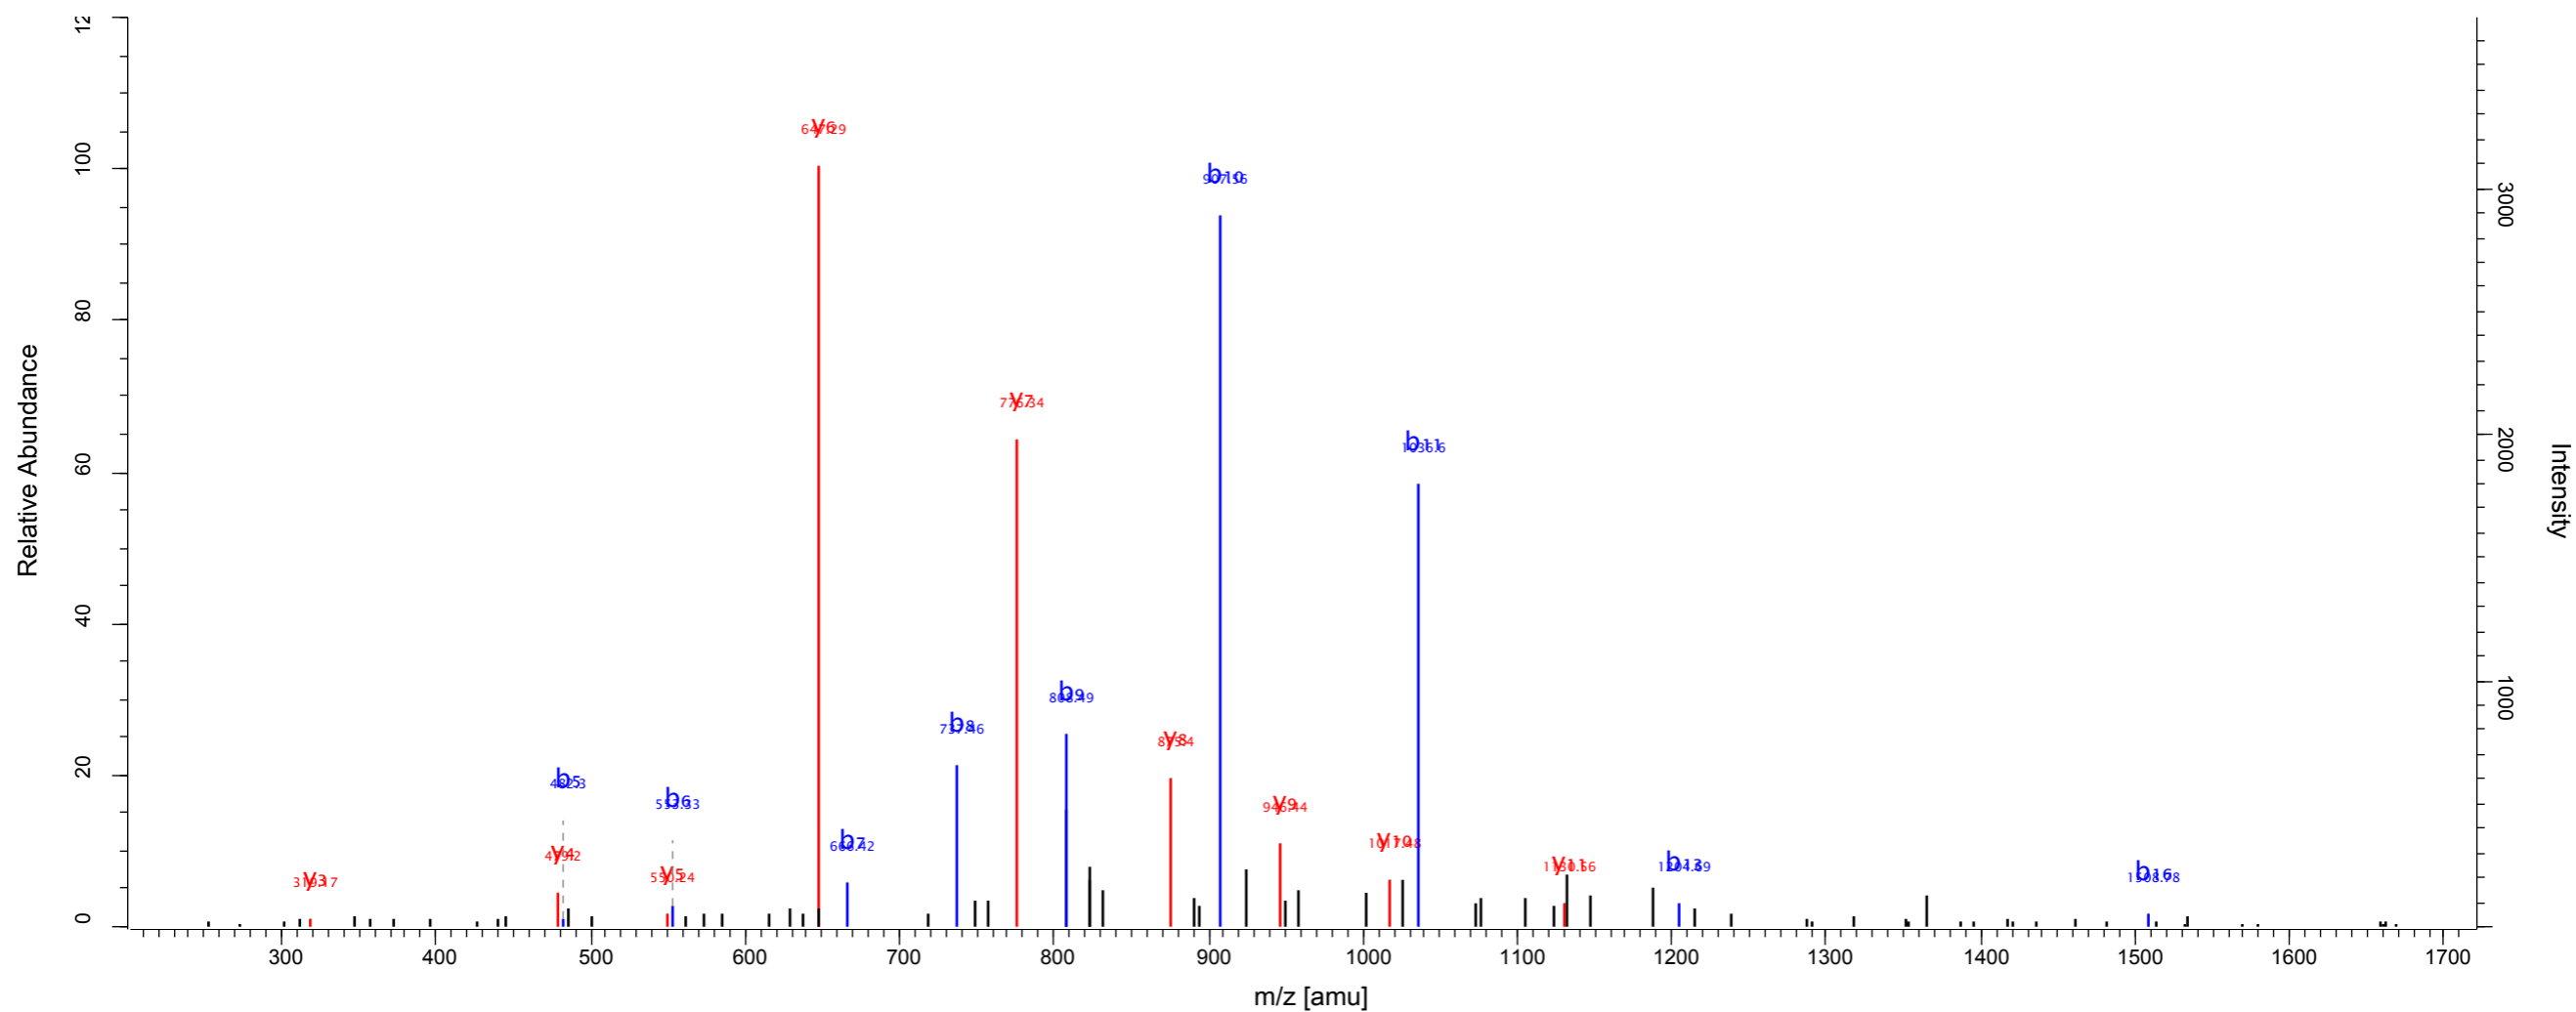

precursor information

|                   |                  |
|-------------------|------------------|
| Mass:             | 1681.89211       |
| m/z:              | 841.04822        |
| Charge:           | 2+               |
| Retention time:   | 122.401012572242 |
| Score:            | 114.7424         |
| Mass Error [ppm]: | -0.018552        |
| PEP:              | 2.5510E-05       |
| Precursor Type:   | MULTI            |

| b ion      |                |    |     |    | y ion          |            |
|------------|----------------|----|-----|----|----------------|------------|
| Δ dalton   | mass           |    | seq |    | Δ dalton       | mass       |
|            | 114.054954941  | 1  | A   | 16 |                |            |
|            | 227.139018921  | 2  | I   | 15 | 1569.841738048 |            |
|            | 298.176132709  | 3  | A   | 14 | 1456.757674068 |            |
|            | 411.260196689  | 4  | I   | 13 | 1385.72056028  |            |
| +0.0424112 | 482.297310477  | 5  | A   | 12 | 1272.6364963   |            |
| -0.0890629 | 553.334424265  | 6  | A   | 11 | 1201.599382512 |            |
| -0.2717597 | 666.418488245  | 7  | I   | 10 | 1130.562268724 | +0.1796746 |
| -0.3011221 | 737.455602033  | 8  | A   | 9  | 1017.478204744 | -0.0628605 |
| -0.0714512 | 808.492715821  | 9  | A   | 8  | 946.441090956  | +0.090098  |
| -0.351474  | 907.561129737  | 10 | V   | 7  | 875.403977168  | +0.0247948 |
| -0.3297971 | 1036.603722833 | 11 | E   | 6  | 776.335563252  | -0.0513225 |
|            | 1133.656486685 | 12 | P   | 5  | 647.292970156  | +0.0275254 |
| -0.3256806 | 1204.693600473 | 13 | A   | 4  | 550.240206304  | +0.0619788 |
|            | 1364.724248674 | 14 | C   | 3  | 479.203092516  | +0.0664387 |
|            | 1421.745712398 | 15 | G   | 2  | 319.172444314  | +0.0358076 |
| -0.1991275 | 1508.77740808  | 16 | S   | 1  | 262.150980591  |            |
|            |                | 17 | R   | 0  | 175.118952181  |            |

general information

|                       |          |
|-----------------------|----------|
| Annotation:           | 12 of 17 |
| AminoAcids Coverage:  | 71 %     |
| Intensity Coverage:   | 72 %     |
| Peak Coverage:        | 72 %     |
| Protein Localisation: | 2 ... 18 |

Scan number 9433 Raw file 20080705\_Orbi6\_SaZa\_ADH\_Exp\_2\_Matrigel\_30h\_InGel\_05  
 Method ITMS; CID Genenames TMBIM1

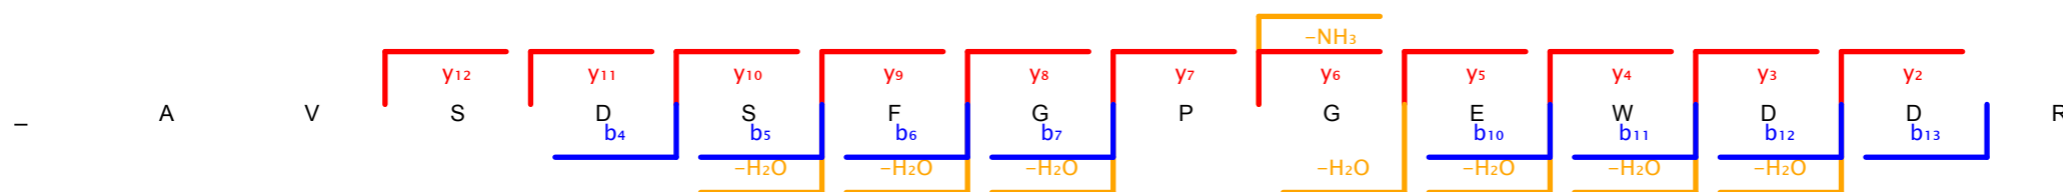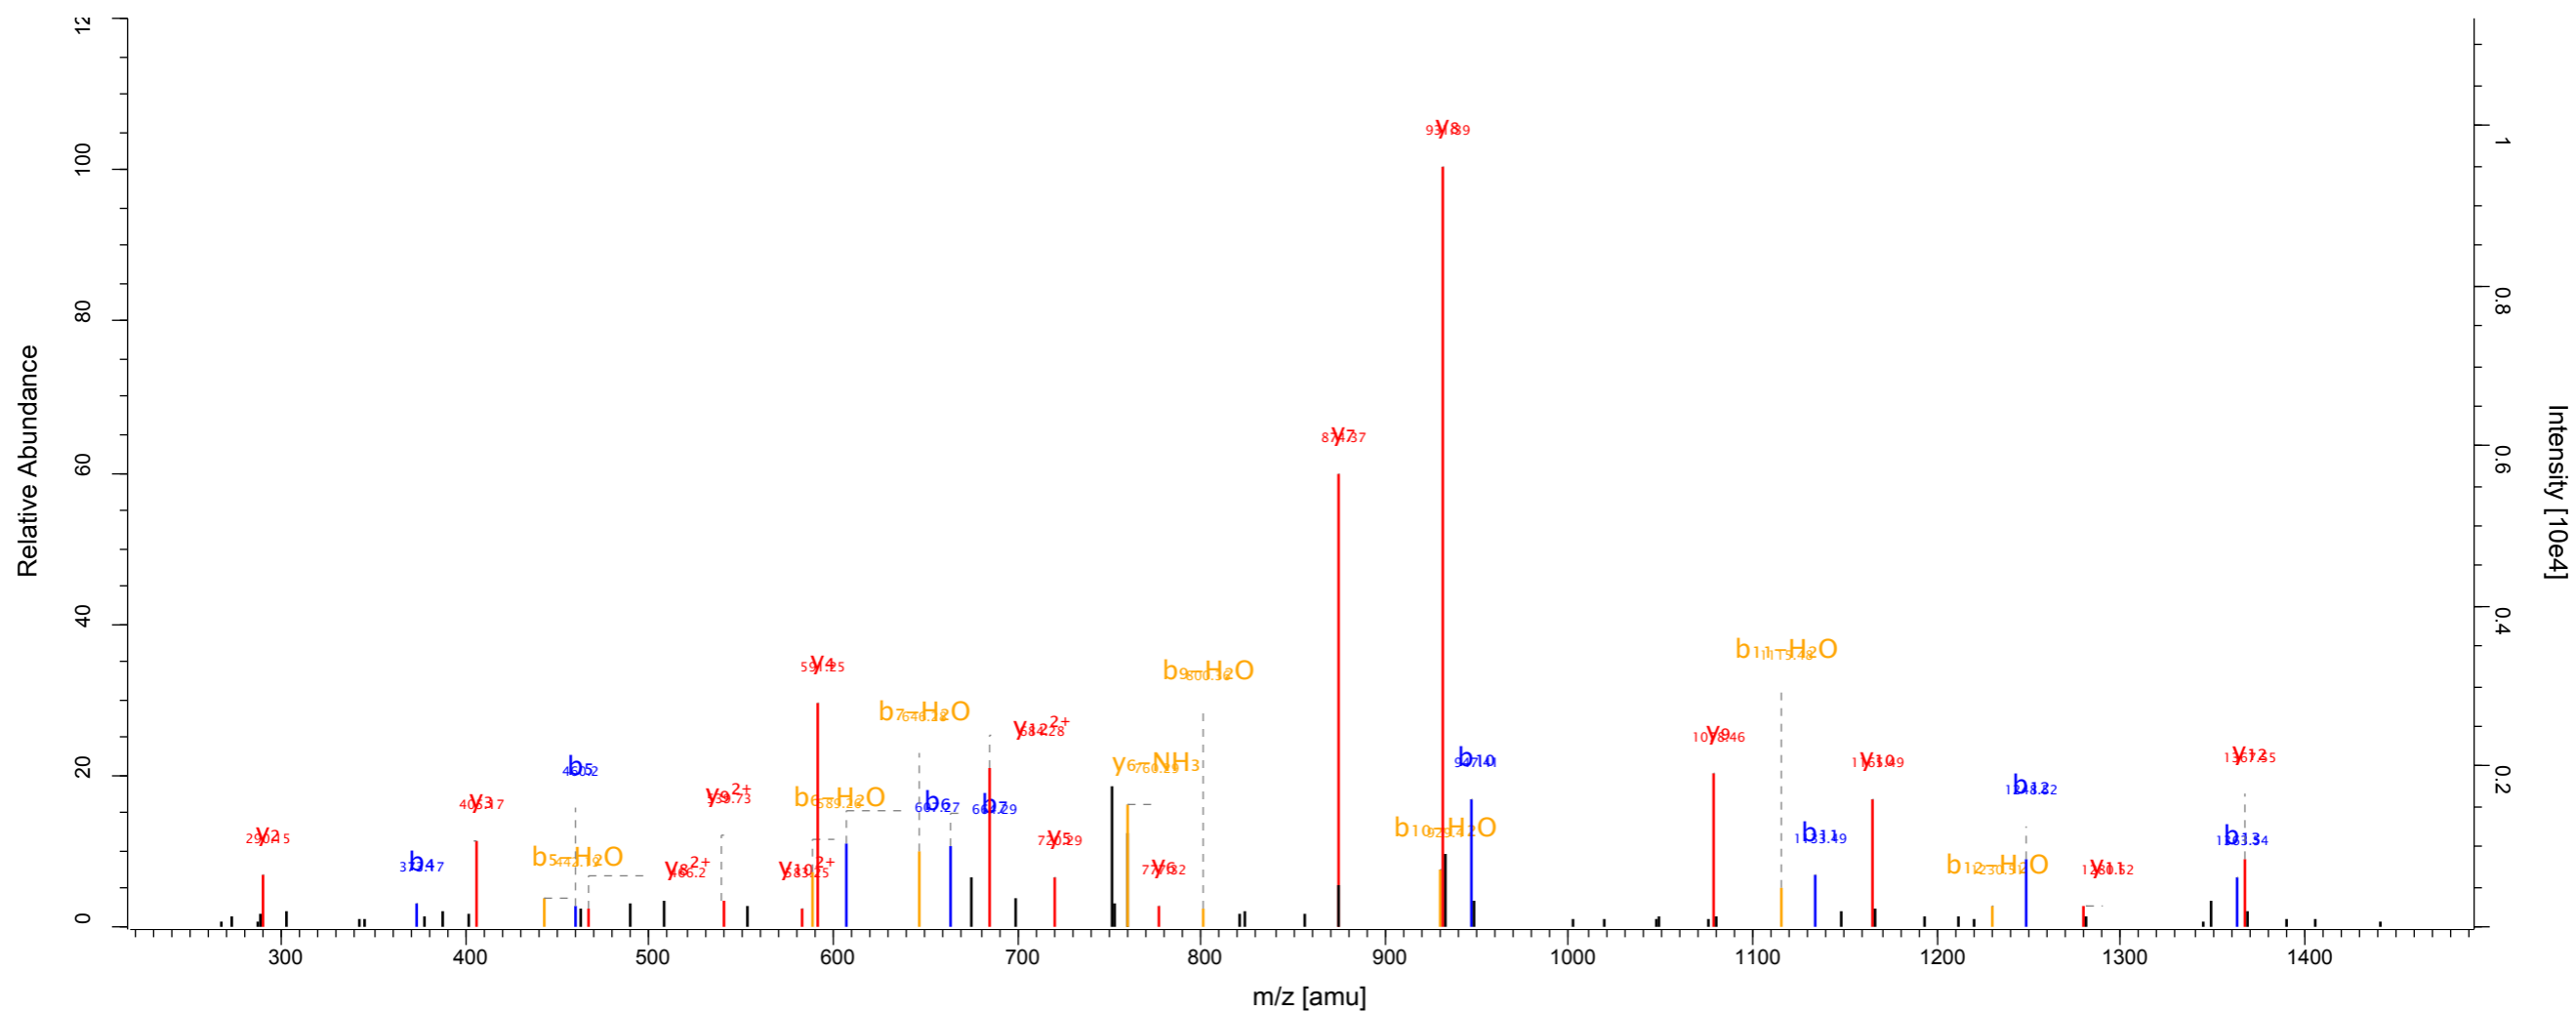

precursor information

|                   |                  |
|-------------------|------------------|
| Mass:             | 1526.61802       |
| m/z:              | 760.22120        |
| Charge:           | 2+               |
| Potentiation:     | 60.8255255126052 |
| Score:            | 200.0215         |
| Mass Error [ppm]: | -0.048045        |
| PEP:              | 8.00885e-17      |
| Precursor Type:   | MULTI            |

general information

|                       |           |
|-----------------------|-----------|
| Annotation:           | 11 of 14  |
| AminoAcids Coverage:  | 70%       |
| Intensity Coverage:   | 78%       |
| Peak Coverage:        | 12%       |
| Protein Localisation: | 79 ... 92 |

| b ion      |                |    |     |    | y ion          |            | y <sup>2+</sup> ion |            |
|------------|----------------|----|-----|----|----------------|------------|---------------------|------------|
| Δ dalton   | mass           |    | seq |    | Δ dalton       | mass       | Δ dalton            | mass       |
|            | 72.044390254   | 1  | A   | 13 |                |            |                     |            |
|            | 171.112804171  | 2  | V   | 12 | 1466.618263278 |            | 1466.618263278      |            |
|            | 258.14483258   | 3  | S   | 11 | 1367.549849362 | -0.1291951 | 684.278562914       | +0.1554581 |
| +0.0849383 | 373.171775612  | 4  | D   | 10 | 1280.517820952 | -0.2509752 | 1280.517820952      |            |
| -0.0165482 | 460.203804022  | 5  | S   | 9  | 1165.49087792  | -0.0982998 | 583.249077193       | +0.1771313 |
| +0.0399769 | 607.272217939  | 6  | F   | 8  | 1078.45884951  | -0.0546747 | 539.733062988       | +0.0925596 |
| +0.0310254 | 664.293681662  | 7  | G   | 7  | 931.390435594  | -0.0323423 | 466.19885603        | +0.191891  |
|            | 761.346445514  | 8  | P   | 6  | 874.36897187   | -0.0807028 | 874.36897187        |            |
|            | 818.367909238  | 9  | G   | 5  | 777.316208018  | +0.1118315 | 777.316208018       |            |
| -0.0531415 | 947.410502334  | 10 | E   | 4  | 720.294744295  | +0.0229437 | 720.294744295       |            |
| -0.0944295 | 1133.489815288 | 11 | W   | 3  | 591.252151198  | -0.0129544 | 591.252151198       |            |
| -0.0917095 | 1248.51675832  | 12 | D   | 2  | 405.172838245  | +0.0669078 | 405.172838245       |            |
| -0.0614015 | 1363.543701352 | 13 | D   | 1  | 290.145895213  | +0.0506075 | 290.145895213       |            |
|            |                | 14 | R   | 0  | 175.118952181  |            | 175.118952181       |            |

Scan number 4894 Raw file 20080705\_Orbi6\_SaZa\_ADH\_Exp\_2\_Matrigel\_30h\_InGel\_06  
 Method ITMS; CID Genenames ADH6

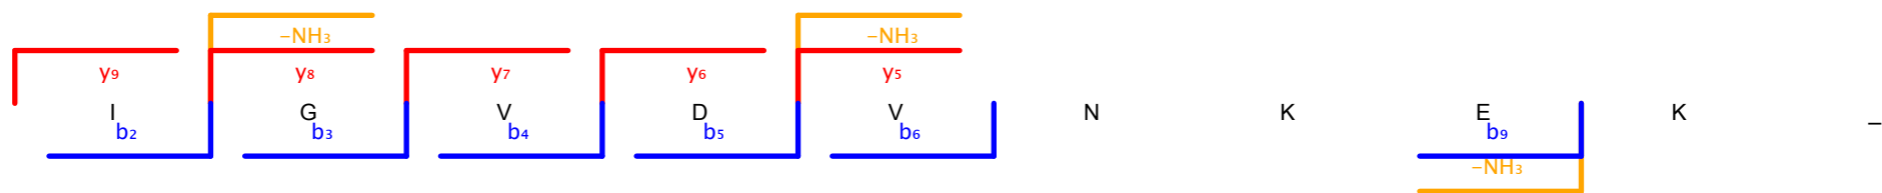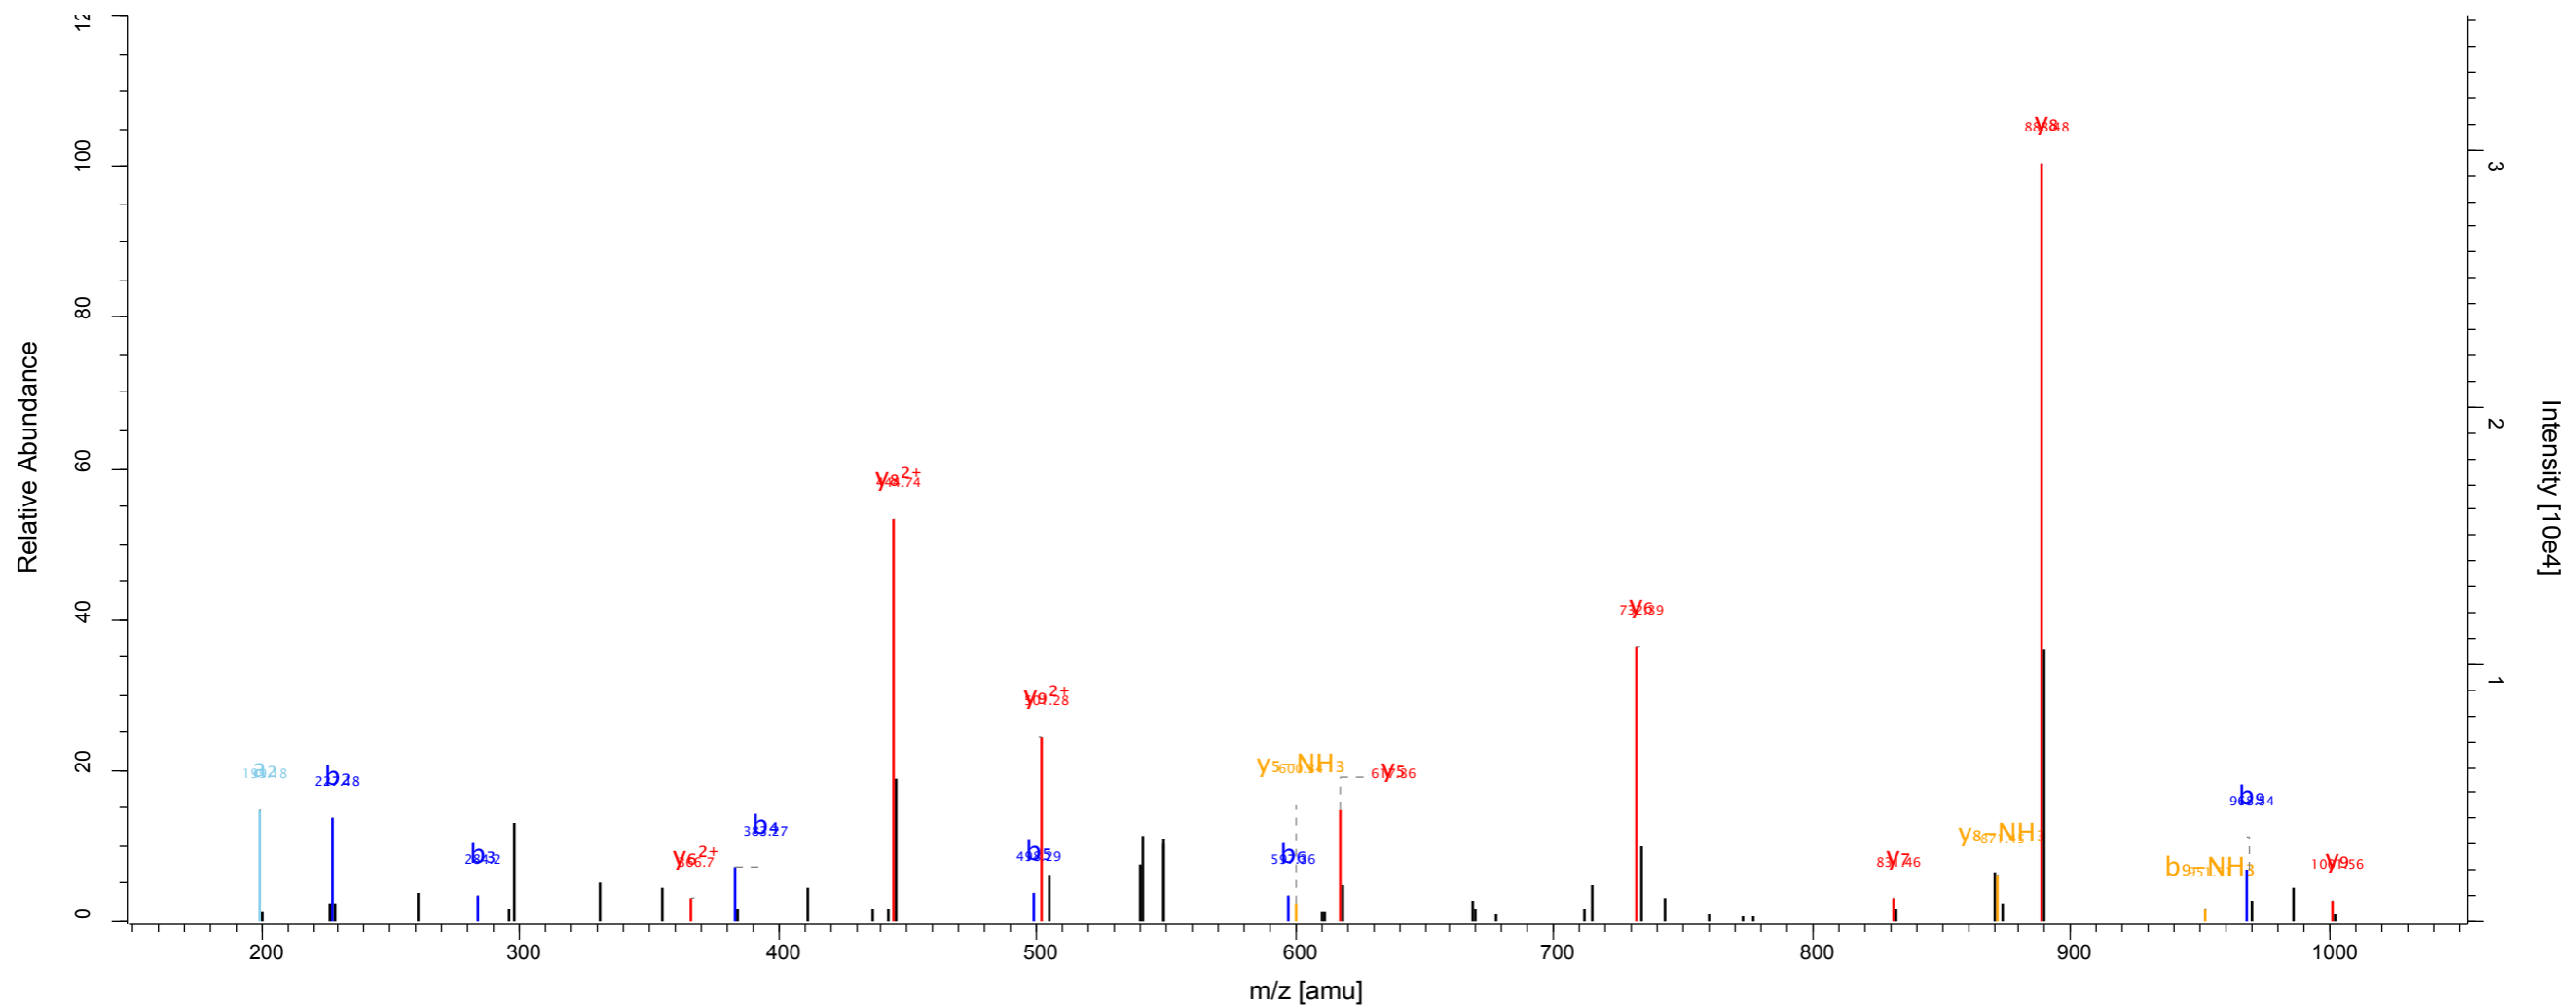

precursor information

|                       |                  |
|-----------------------|------------------|
| Mass:                 | 1113.6304        |
| m/z:                  | 557.82608        |
| Charge:               | 2+               |
| Retention time:       | 46.5567512512207 |
| Score:                | 141.1058         |
| Mass Error (ppm):     | 0.023465         |
| DEP:                  | 0.00020847       |
| 96 Precursor Type:    | MULTI            |
| Annotation:           | 7 of 10          |
| AminoAcids Coverage:  | 70 %             |
| Intensity Coverage:   | 60 %             |
| Peak Coverage:        | 32 %             |
| Protein Localisation: | 220 ... 229      |

| a ion      |              | b ion      |              |    |     |   | y ion        |            | y <sup>2+</sup> ion |            |
|------------|--------------|------------|--------------|----|-----|---|--------------|------------|---------------------|------------|
| Δ dalton   | mass         | Δ dalton   | mass         |    | seq |   | Δ dalton     | mass       | Δ dalton            | mass       |
|            | 86.096425825 |            | 114.09134045 | 1  | I   | 9 |              |            |                     |            |
| -0.0237973 | 199.18048981 | -0.0670365 | 227.17540443 | 2  | I   | 8 | 1001.5625863 | -0.0625253 | 501.28493138        | +0.1444509 |
|            | 256.20195353 | +0.0783394 | 284.19686815 | 3  | G   | 7 | 888.47852232 | -0.0835638 | 444.74289939        | +0.0243125 |
|            | 355.27036745 | -0.0039295 | 383.26528207 | 4  | V   | 6 | 831.4570586  | +0.1398042 | 831.4570586         |            |
|            | 470.29731048 | +0.0387075 | 498.2922251  | 5  | D   | 5 | 732.38864468 | -0.0392184 | 366.69796057        | -0.0431144 |
|            | 569.36572439 | -0.188764  | 597.36063902 | 6  | V   | 4 | 617.36170165 | +0.000542  | 617.36170165        |            |
|            | 683.40865184 |            | 711.40356646 | 7  | N   | 3 | 518.29328773 |            | 518.29328773        |            |
|            | 811.50361486 |            | 839.49852948 | 8  | K   | 2 | 404.25036028 |            | 404.25036028        |            |
|            | 940.54620795 | -0.1778413 | 968.54112258 | 9  | E   | 1 | 276.15539727 |            | 276.15539727        |            |
|            |              |            |              | 10 | K   | 0 | 147.11280417 |            | 147.11280417        |            |

Scan number 3043 Raw file 20080708\_Orbi4\_SaZa\_ADH\_Matrigel\_Exp\_2\_30h\_InGel\_13  
 Method ITMS; CID Genenames CCDC82

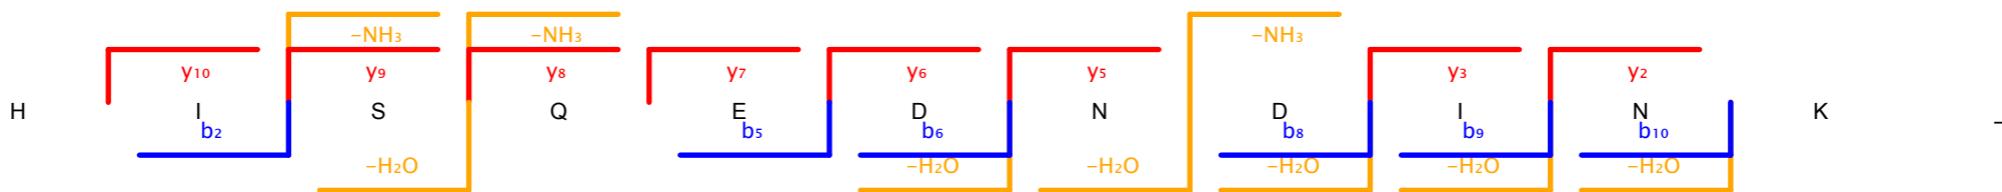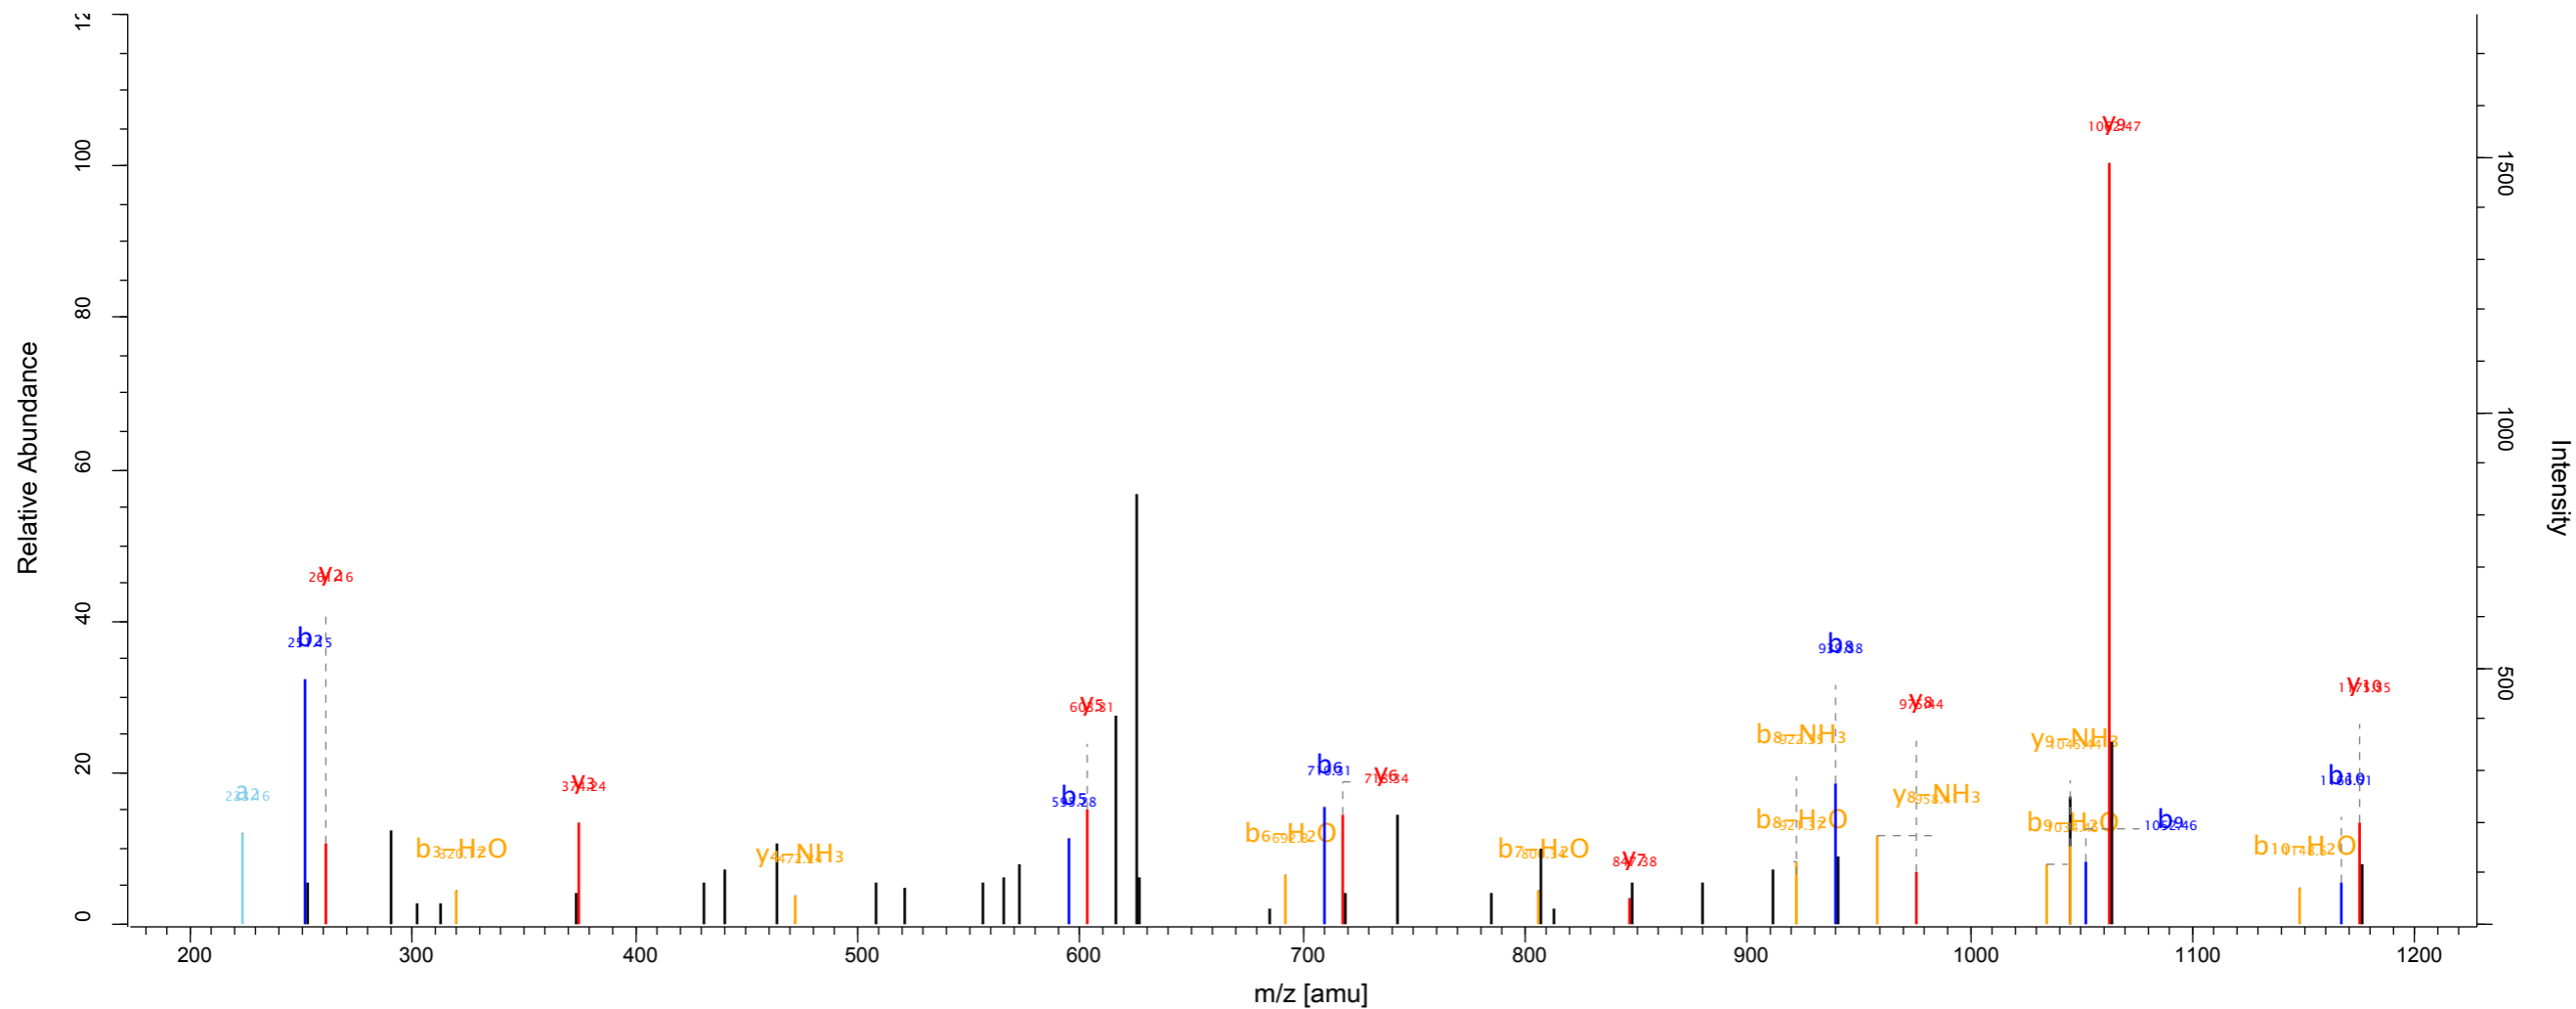

precursor information

|                   |                  |
|-------------------|------------------|
| Mass:             | 1211.60572       |
| m/z:              | 656.81014        |
| Charge:           | 2+               |
| Retention time:   | 10.5185640108887 |
| Score:            | 141.005          |
| Mass Error (ppm): | 0.16002          |
| PEP:              | 0.0002208        |
| Precursor Type:   | ISO              |

general information

|                       |                          |
|-----------------------|--------------------------|
| Annotation:           | 9 of 11                  |
| AminoAcids Coverage:  | 82 %                     |
| Intensity Coverage:   | 55 %                     |
| Peak Coverage:        | 46 %                     |
| Protein Localisation: | 129 ... 139; 152 ... 162 |

| a ion      |                | b ion      |                |    | y ion |    |                |            |
|------------|----------------|------------|----------------|----|-------|----|----------------|------------|
| Δ dalton   | mass           | Δ dalton   | mass           |    | seq   |    | Δ dalton       | mass       |
|            | 110.071273707  |            | 138.066188329  | 1  | H     | 10 |                |            |
| +0.0255858 | 223.155337687  | +0.0234843 | 251.150252309  | 2  | I     | 9  | 1175.553872107 | +0.0337744 |
|            | 310.187366097  |            | 338.182280719  | 3  | S     | 8  | 1062.469808127 | +0.0253091 |
|            | 438.245943609  |            | 466.240858231  | 4  | Q     | 7  | 975.437779717  | +0.0263926 |
|            | 567.288536705  | +0.1502035 | 595.283451327  | 5  | E     | 6  | 847.379202206  | -0.0106109 |
|            | 682.315479737  | +0.0647887 | 710.310394359  | 6  | D     | 5  | 718.336609109  | +0.1483152 |
|            | 796.358407184  |            | 824.353321806  | 7  | N     | 4  | 603.309666077  | +0.0920063 |
|            | 911.385350216  | +0.1500086 | 939.380264838  | 8  | D     | 3  | 489.26673863   |            |
|            | 1024.469414196 | +0.1410179 | 1052.464328818 | 9  | I     | 2  | 374.239795598  | +0.1153069 |
|            | 1138.512341644 | +0.2988961 | 1166.507256266 | 10 | N     | 1  | 261.155731618  | +0.0474544 |
|            |                |            |                | 11 | K     | 0  | 147.112804171  |            |

Scan number 10432 Raw file 20080714\_Orbi1\_SaZa\_SA\_ADH\_Matrigel\_Exp\_1\_24h\_InGel\_01  
 Method ITMS; CID Genenames ELOF1

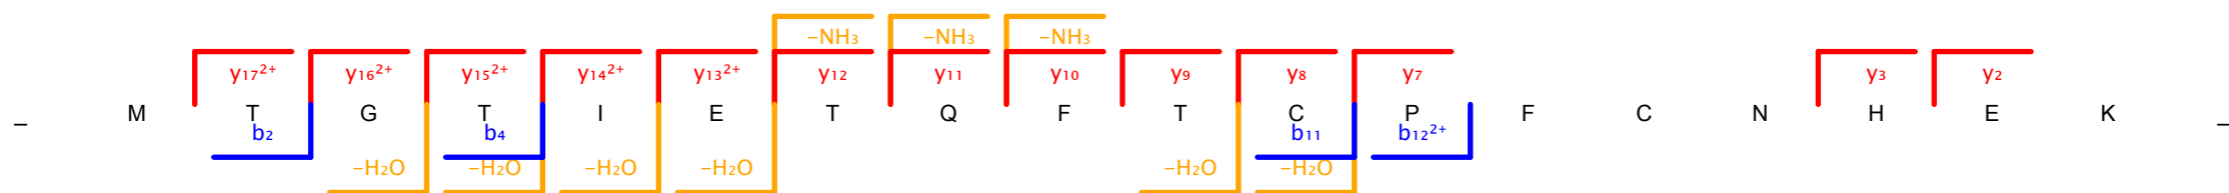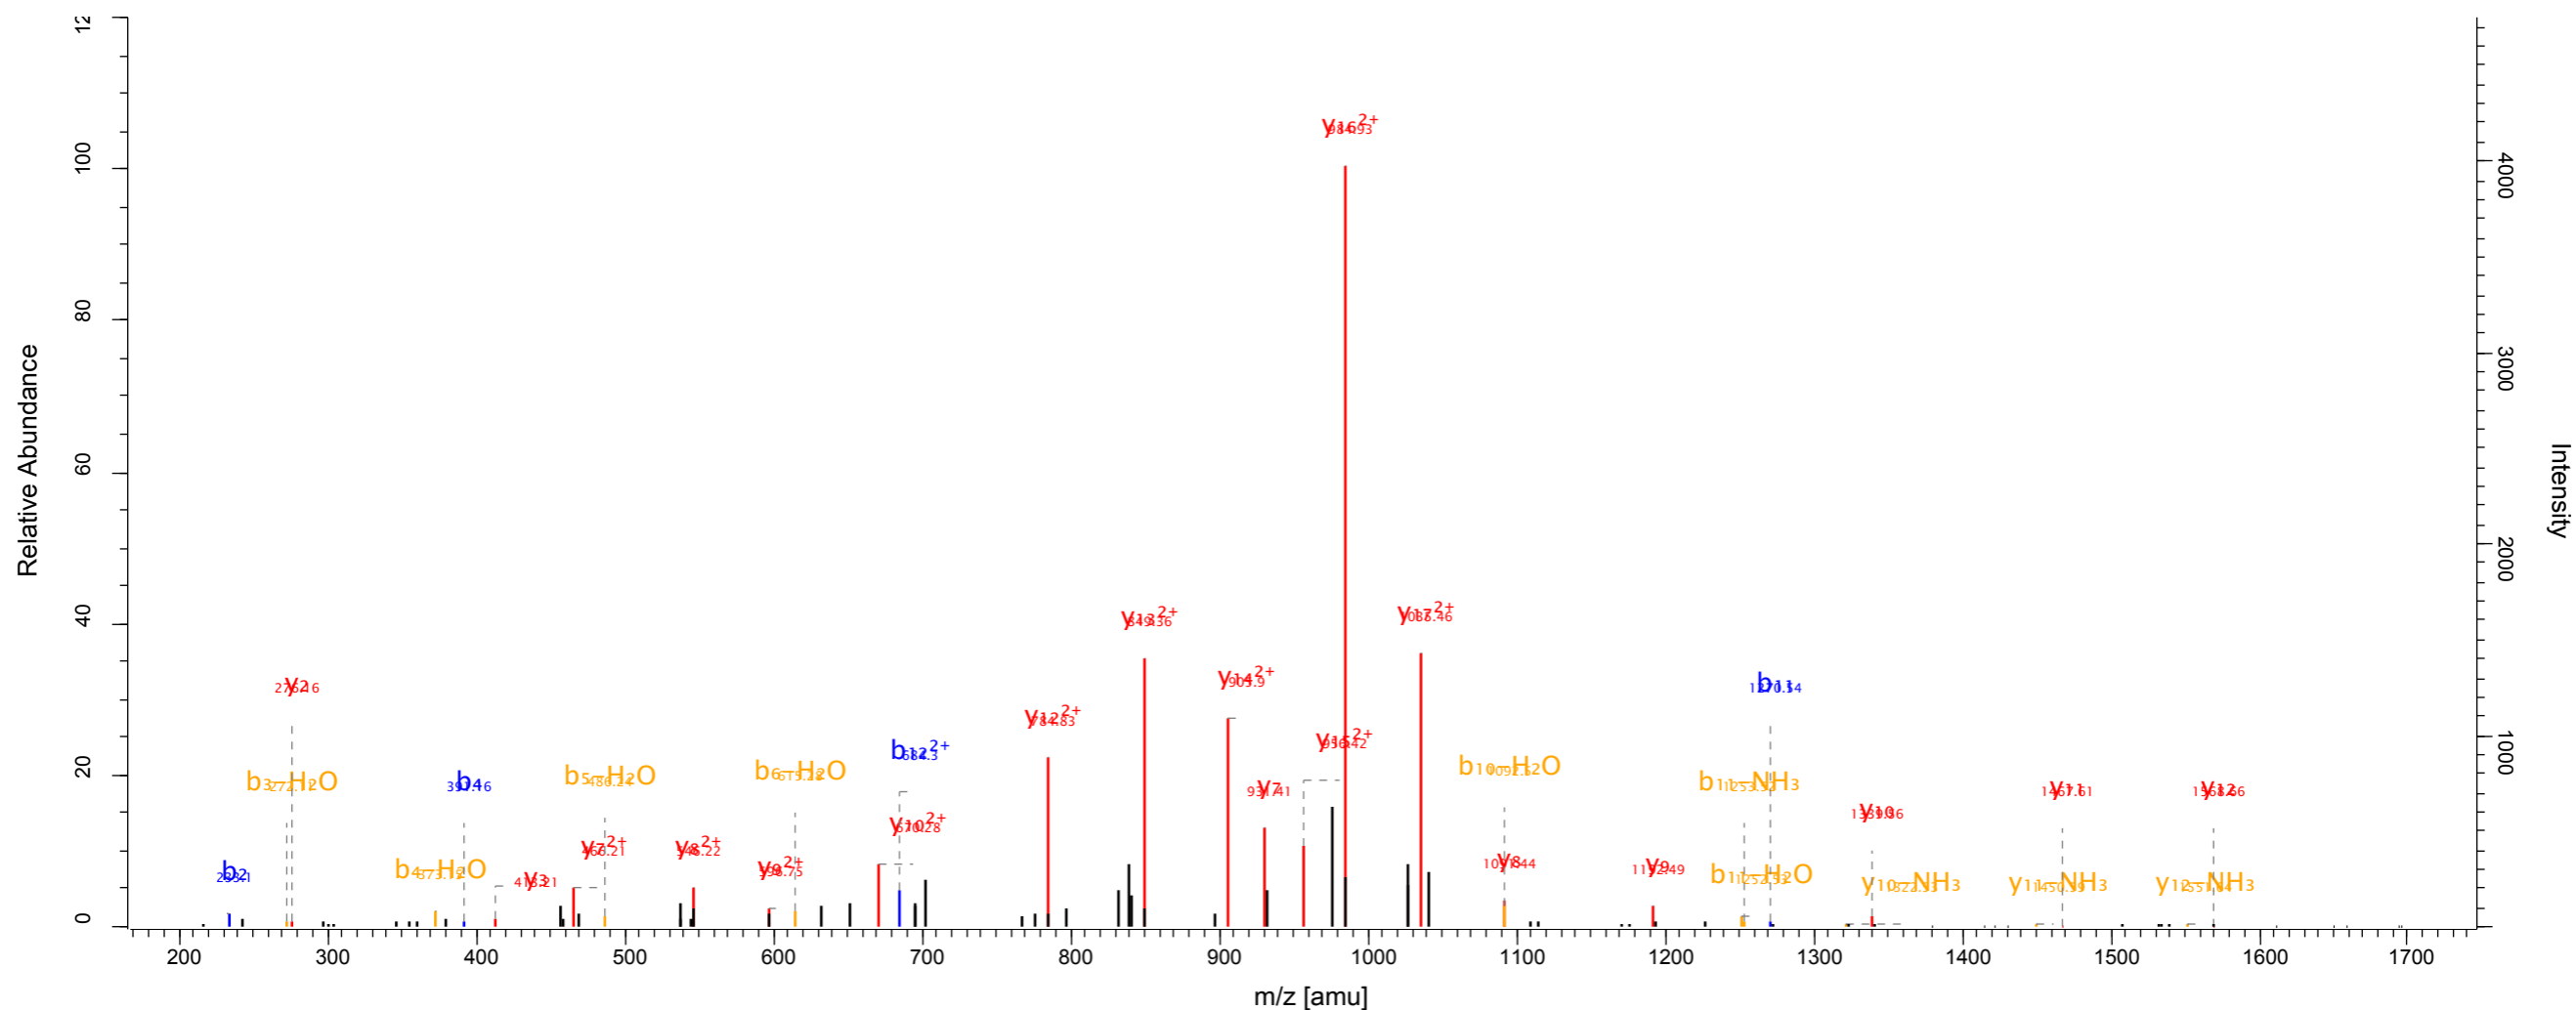

precursor information

|                   |                  |
|-------------------|------------------|
| Mass:             | 2100.02810       |
| m/z:              | 724.22001        |
| Charge:           | 2+               |
| Potenttime:       | 81.0662841706875 |
| Score:            | 102.1784         |
| Mass Error (ppm): | 0.25225          |
| DEP:              | 1.2025.26        |
| Precursor Type:   | MULTI            |

| b <sup>2+</sup> ion |              | b ion      |              |    |     |    | y ion        |            | y <sup>2+</sup> ion |            |
|---------------------|--------------|------------|--------------|----|-----|----|--------------|------------|---------------------|------------|
| Δ dalton            | mass         | Δ dalton   | mass         |    | seq |    | Δ dalton     | mass       | Δ dalton            | mass       |
|                     | 132.04776107 |            | 132.04776107 | 1  | M   | 17 |              |            |                     |            |
|                     | 233.09543955 | +0.097279  | 233.09543955 | 2  | T   | 16 | 2069.9055369 |            | 1035.4564067        | +0.1186666 |
|                     | 290.11690327 |            | 290.11690327 | 3  | G   | 15 | 1968.8578584 |            | 984.93256743        | +0.113331  |
|                     | 391.16458174 | -0.0472722 | 391.16458174 | 4  | T   | 14 | 1911.8363947 |            | 956.42183557        | +0.0591215 |
|                     | 504.24864572 |            | 504.24864572 | 5  | I   | 13 | 1810.7887162 |            | 905.89799633        | +0.0952288 |
|                     | 633.29123882 |            | 633.29123882 | 6  | E   | 12 | 1697.7046522 |            | 849.35596434        | +0.0547412 |
|                     | 734.3389173  |            | 734.3389173  | 7  | T   | 11 | 1568.6620591 | -0.2466538 | 784.83466779        | +0.0265993 |
|                     | 862.39749481 |            | 862.39749481 | 8  | Q   | 10 | 1467.6143806 | -0.3884285 | 1467.6143806        |            |
|                     | 1009.4659087 |            | 1009.4659087 | 9  | F   | 9  | 1339.5558031 | -0.0755785 | 670.2815398         | +0.0379792 |
|                     | 1110.5135872 |            | 1110.5135872 | 10 | T   | 8  | 1192.4873892 | -0.1204459 | 596.74733284        | -0.1061585 |
|                     | 1270.5442354 | -0.1009981 | 1270.5442354 | 11 | C   | 7  | 1091.4397107 | -0.1412488 | 546.22349361        | -0.0946484 |
| +0.4734359          | 684.30213786 |            | 1367.5969993 | 12 | P   | 6  | 931.40906255 | -0.1548511 | 466.20816951        | +0.0082612 |
|                     | 1514.6654132 |            | 1514.6654132 | 13 | F   | 5  | 834.35629869 |            | 834.35629869        |            |
|                     | 1674.6960614 |            | 1674.6960614 | 14 | C   | 4  | 687.28788478 |            | 687.28788478        |            |
|                     | 1788.7389888 |            | 1788.7389888 | 15 | N   | 3  | 527.25723658 |            | 527.25723658        |            |
|                     | 1925.7979007 |            | 1925.7979007 | 16 | H   | 2  | 413.21430913 | +0.0113989 | 413.21430913        |            |
|                     | 2054.8404938 |            | 2054.8404938 | 17 | E   | 1  | 276.15539727 | -0.0157183 | 276.15539727        |            |
|                     |              |            |              | 18 | K   | 0  | 147.11280417 |            | 147.11280417        |            |

general information

|                       |           |
|-----------------------|-----------|
| Annotation:           | 14 of 18  |
| AminoAcids Coverage:  | 78 %      |
| Intensity Coverage:   | 71 %      |
| Peak Coverage:        | 25 %      |
| Protein Localisation: | 16 ... 33 |



Scan number 11878 Raw file 20080714\_Orbi1\_SaZa\_SA\_ADH\_Matrigel\_Exp\_1\_24h\_InGel\_03  
 Method ITMS; CID Genenames ITGB1BP1

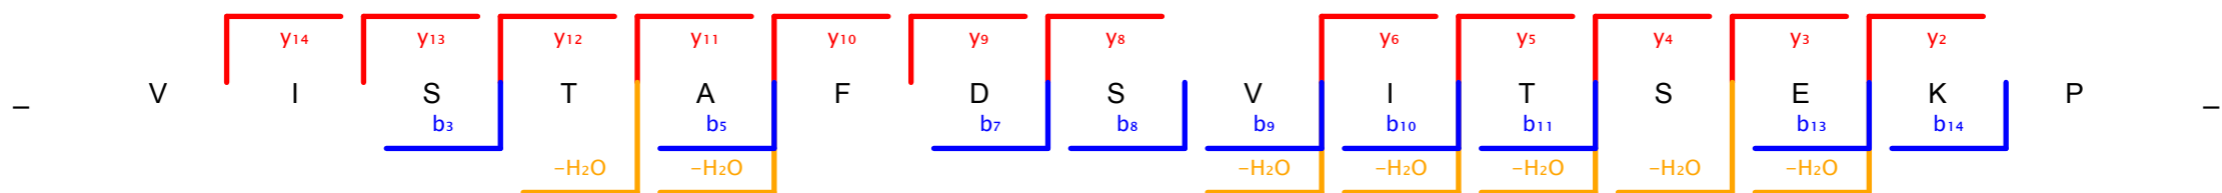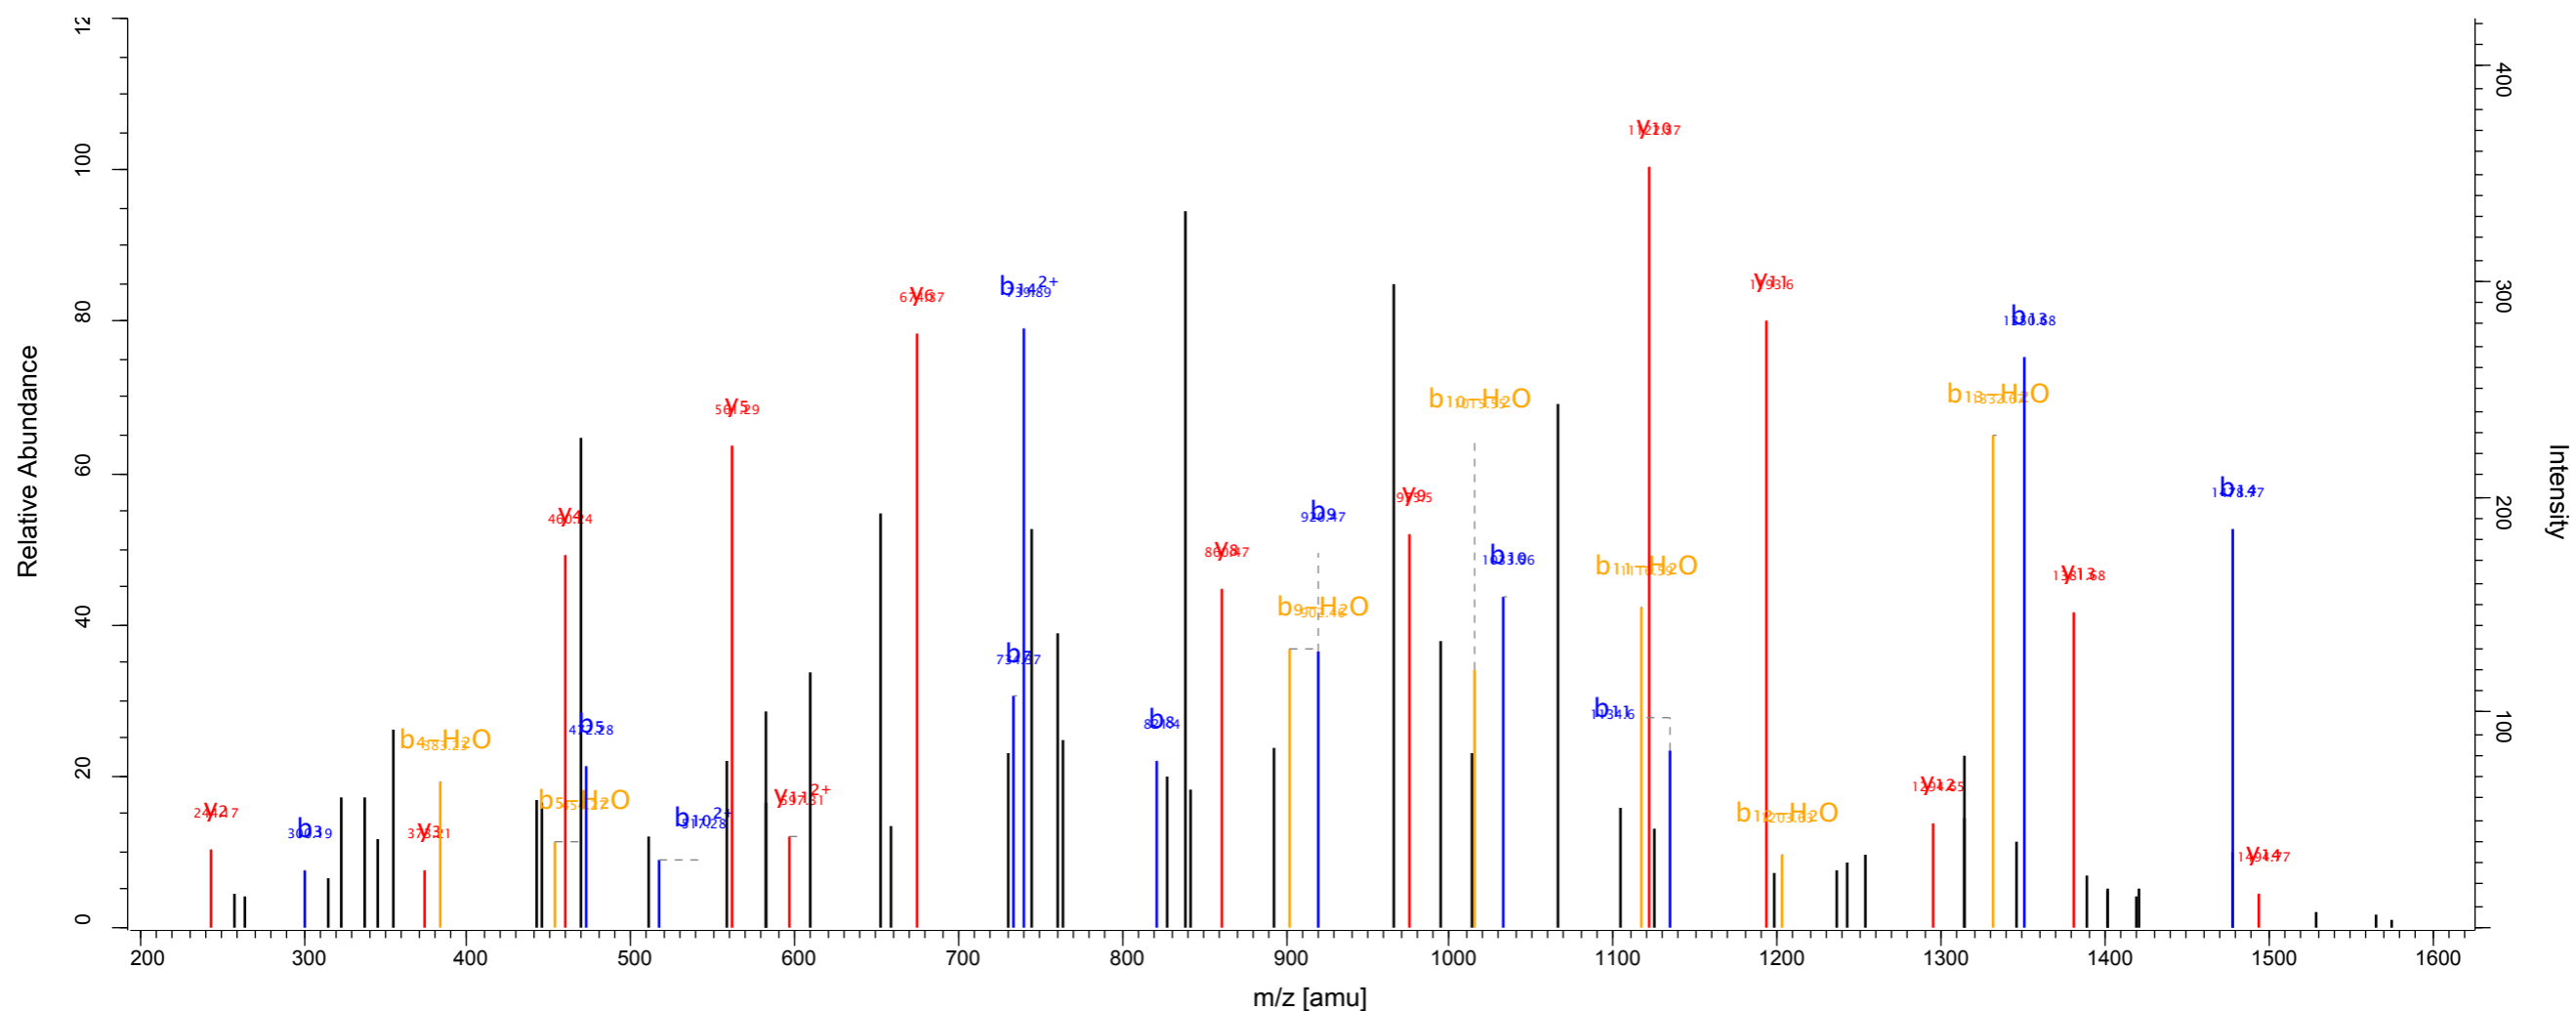

precursor information

|                   |                  |
|-------------------|------------------|
| Mass:             | 0                |
| m/z:              | 707.42250        |
| Charge:           | 0.1              |
| Potentiation:     | 04.7428588867188 |
| Score:            | 202.6522         |
| Mass Error (ppm): | 0.54887          |
| DEP:              | 5.7054E-22       |
| Precursor Type:   | PEAK             |

general information

|                       |             |
|-----------------------|-------------|
| Annotation:           | 13 of 15    |
| AminoAcids Coverage:  | 87%         |
| Intensity Coverage:   | 52%         |
| Peak Coverage:        | 40%         |
| Protein Localisation: | 186 ... 200 |

| b <sup>2+</sup> ion |              | b ion      |              |    |     |    | y ion        |            | y <sup>2+</sup> ion |            |
|---------------------|--------------|------------|--------------|----|-----|----|--------------|------------|---------------------|------------|
| Δ dalton            | mass         | Δ dalton   | mass         |    | seq |    | Δ dalton     | mass       | Δ dalton            | mass       |
|                     | 100.07569038 |            | 100.07569038 | 1  | V   | 14 |              |            |                     |            |
|                     | 213.15975436 |            | 213.15975436 | 2  | I   | 13 | 1494.7686159 | -0.2334597 | 1494.7686159        |            |
|                     | 300.19178277 | -0.0311993 | 300.19178277 | 3  | S   | 12 | 1381.6845519 | -0.2371642 | 1381.6845519        |            |
|                     | 401.23946125 |            | 401.23946125 | 4  | T   | 11 | 1294.6525235 | -0.1210294 | 1294.6525235        |            |
|                     | 472.27657504 | -0.0696659 | 472.27657504 | 5  | A   | 10 | 1193.604845  | -0.1063099 | 597.30606076        | -0.2305603 |
|                     | 619.34498895 |            | 619.34498895 | 6  | F   | 9  | 1122.5677313 | -0.2492498 | 1122.5677313        |            |
|                     | 734.37193198 | -0.2165975 | 734.37193198 | 7  | D   | 8  | 975.49931734 | -0.2387583 | 975.49931734        |            |
|                     | 821.40396039 | -0.2751152 | 821.40396039 | 8  | S   | 7  | 860.47237431 | -0.2002796 | 860.47237431        |            |
|                     | 920.47237431 | -0.3967518 | 920.47237431 | 9  | V   | 6  | 773.4403459  |            | 773.4403459         |            |
| -0.0356416          | 517.28185738 | -0.2215994 | 1033.5564383 | 10 | I   | 5  | 674.37193198 | -0.1597127 | 674.37193198        |            |
|                     | 1134.6041168 | -0.3514312 | 1134.6041168 | 11 | T   | 4  | 561.287868   | -0.0894427 | 561.287868          |            |
|                     | 1221.6361452 |            | 1221.6361452 | 12 | S   | 3  | 460.24018953 | -0.011857  | 460.24018953        |            |
|                     | 1350.6787383 | -0.2428252 | 1350.6787383 | 13 | E   | 2  | 373.20816112 | -0.0086372 | 373.20816112        |            |
| -0.2203839          | 739.89048888 | -0.184712  | 1478.7737013 | 14 | K   | 1  | 244.16556802 | +0.0053304 | 244.16556802        |            |
|                     |              |            |              | 15 | P   | 0  | 116.070605   |            | 116.070605          |            |

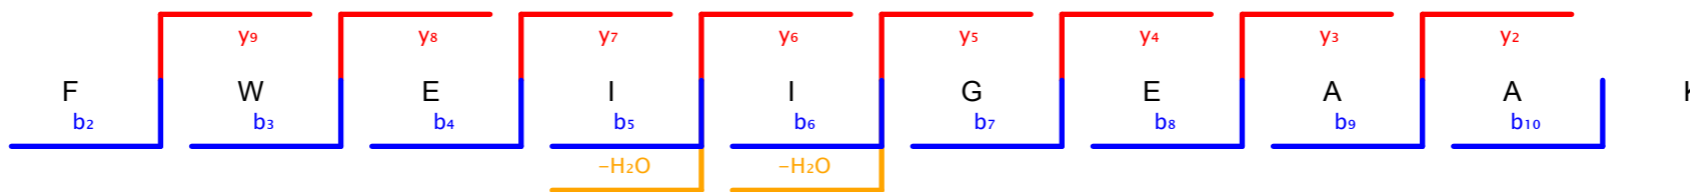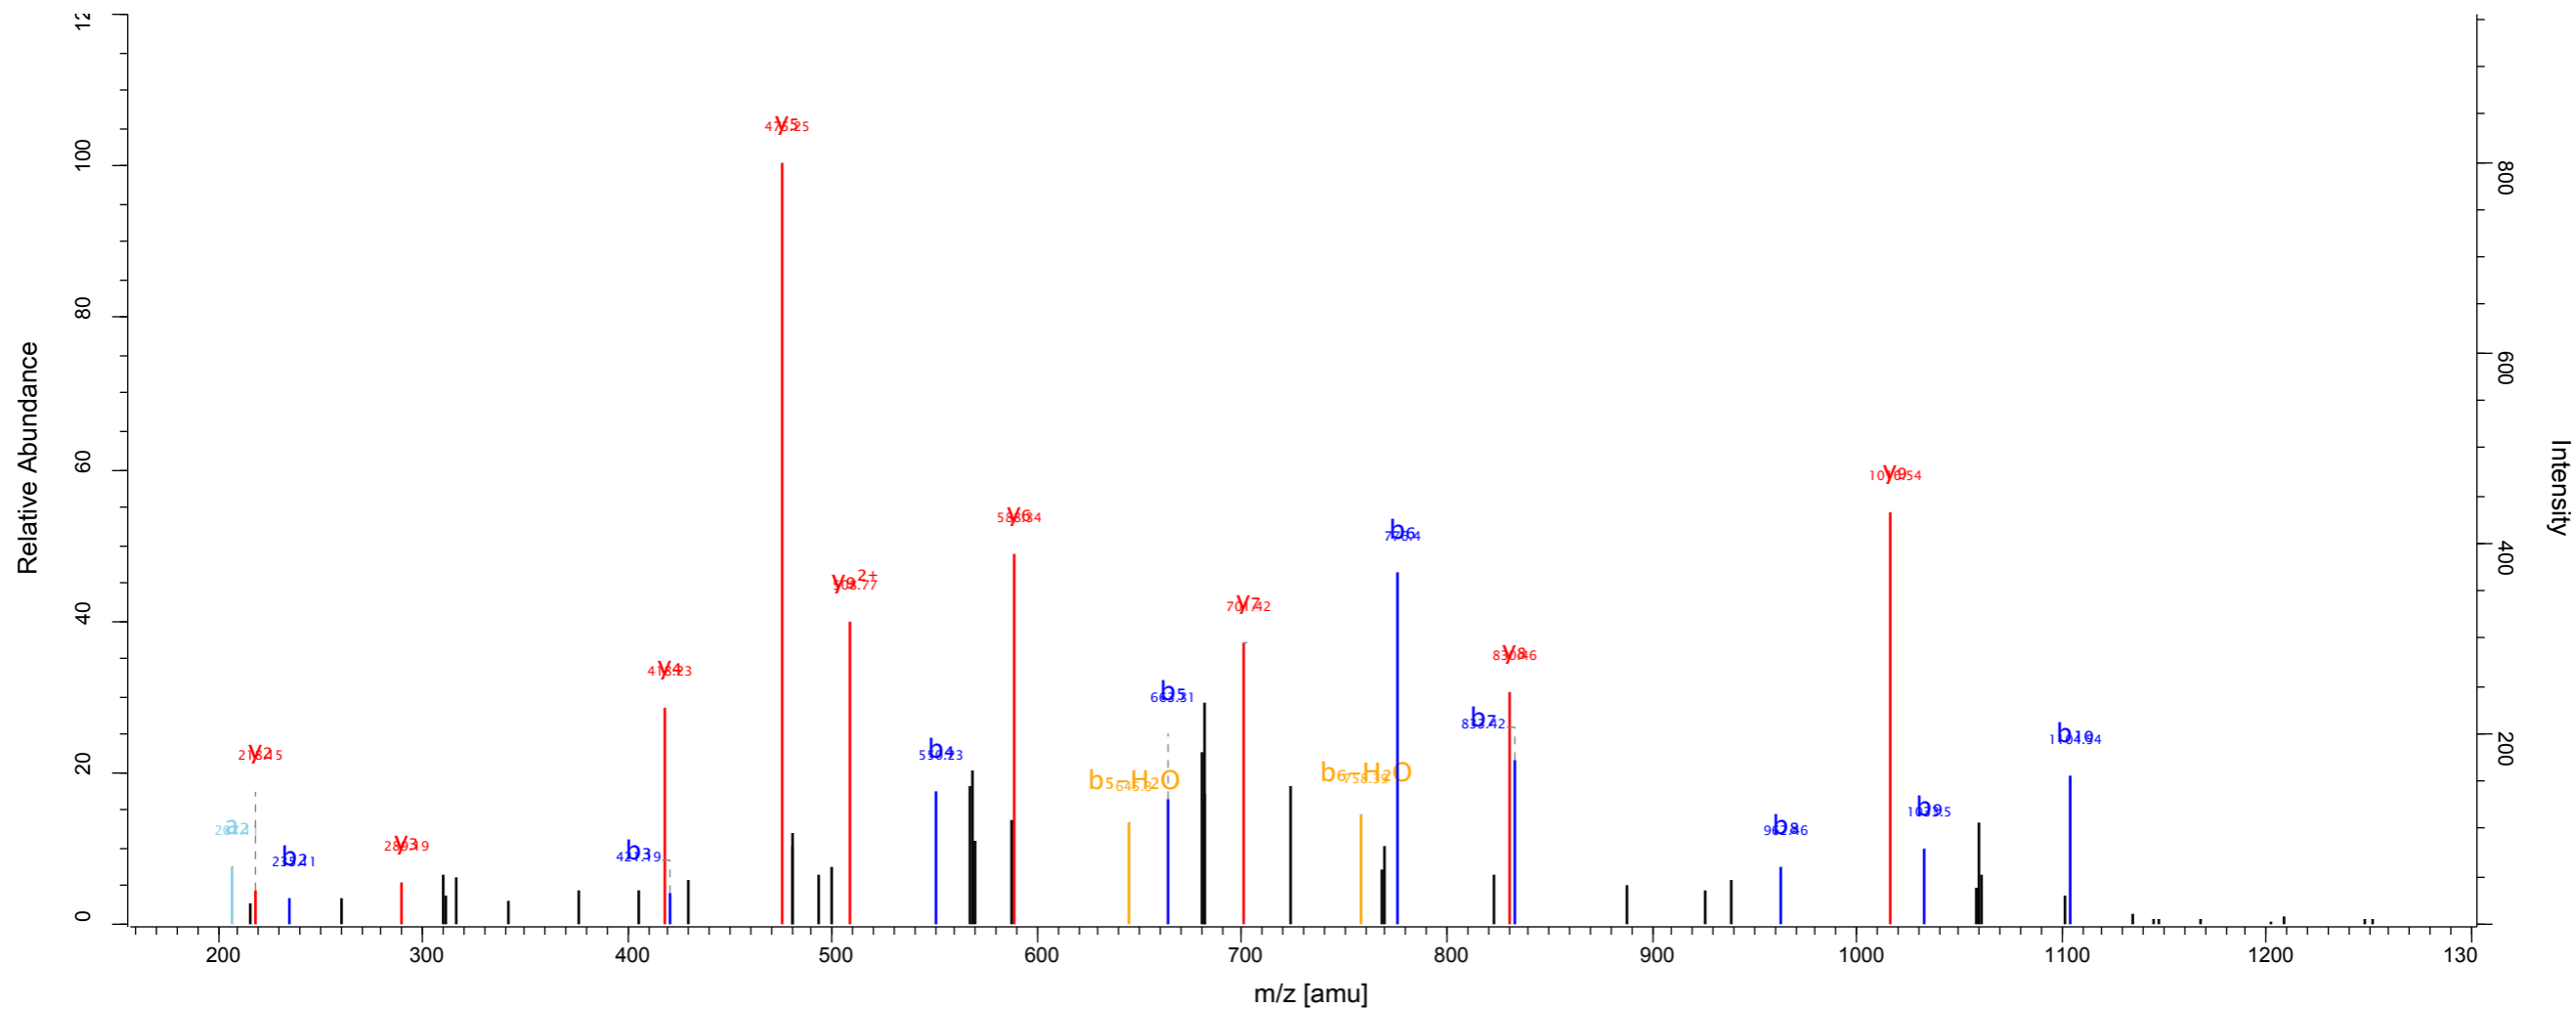

precursor information

|                   |                 |
|-------------------|-----------------|
| Mass:             | 0               |
| m/z:              | 625.8245        |
| Charge:           | 0+              |
| Retention time:   | 11.124274380648 |
| Score:            | 147.7427        |
| Mass Error (ppm): | 0.1307          |
| PEP:              | 0.00012747      |
| Precursor Type:   | PEAK            |

general information

|                       |           |
|-----------------------|-----------|
| Annotation:           | 9 of 11   |
| AminoAcids Coverage:  | 82 %      |
| Intensity Coverage:   | 64 %      |
| Peak Coverage:        | 25 %      |
| Protein Localisation: | 83 ... 93 |

| a ion      |              | b ion      |              |    |     |    | y ion        |            | y <sup>2+</sup> ion |            |
|------------|--------------|------------|--------------|----|-----|----|--------------|------------|---------------------|------------|
| Δ dalton   | mass         | Δ dalton   | mass         |    | seq |    | Δ dalton     | mass       | Δ dalton            | mass       |
|            | 60.044390254 |            | 88.039304876 | 1  | S   | 10 |              |            |                     |            |
| +0.2296336 | 207.11280417 | +0.0296713 | 235.10771879 | 2  | F   | 9  | 1163.6095365 |            | 1163.6095365        |            |
|            | 393.19211712 | -0.0592241 | 421.18703175 | 3  | W   | 8  | 1016.5411226 | -0.0982515 | 508.77419952        | -0.0210867 |
|            | 522.23471022 | -0.0500594 | 550.22962484 | 4  | E   | 7  | 830.46180962 | -0.0275445 | 830.46180962        |            |
|            | 635.3187742  | -0.0235887 | 663.31368882 | 5  | I   | 6  | 701.41921653 | -0.145718  | 701.41921653        |            |
|            | 748.40283818 | -0.3223744 | 776.3977528  | 6  | I   | 5  | 588.33515255 | -0.1445398 | 588.33515255        |            |
|            | 805.4243019  | -0.1676906 | 833.41921653 | 7  | G   | 4  | 475.25108857 | -0.1275534 | 475.25108857        |            |
|            | 934.466895   | -0.2051568 | 962.46180962 | 8  | E   | 3  | 418.22962484 | -0.091014  | 418.22962484        |            |
|            | 1005.5040088 | -0.2263404 | 1033.4989234 | 9  | A   | 2  | 289.18703175 | +0.0856428 | 289.18703175        |            |
|            | 1076.5411226 | -0.3066671 | 1104.5360372 | 10 | A   | 1  | 218.14991796 | +0.0814358 | 218.14991796        |            |
|            |              |            |              | 11 | K   | 0  | 147.11280417 |            | 147.11280417        |            |

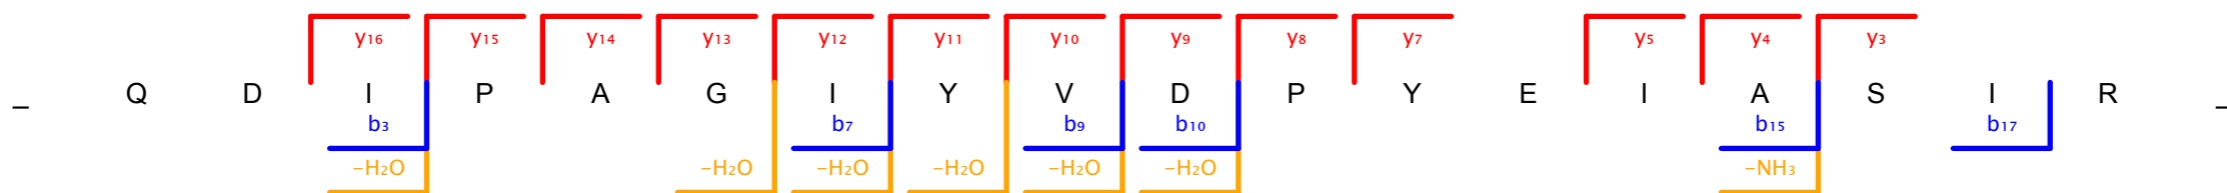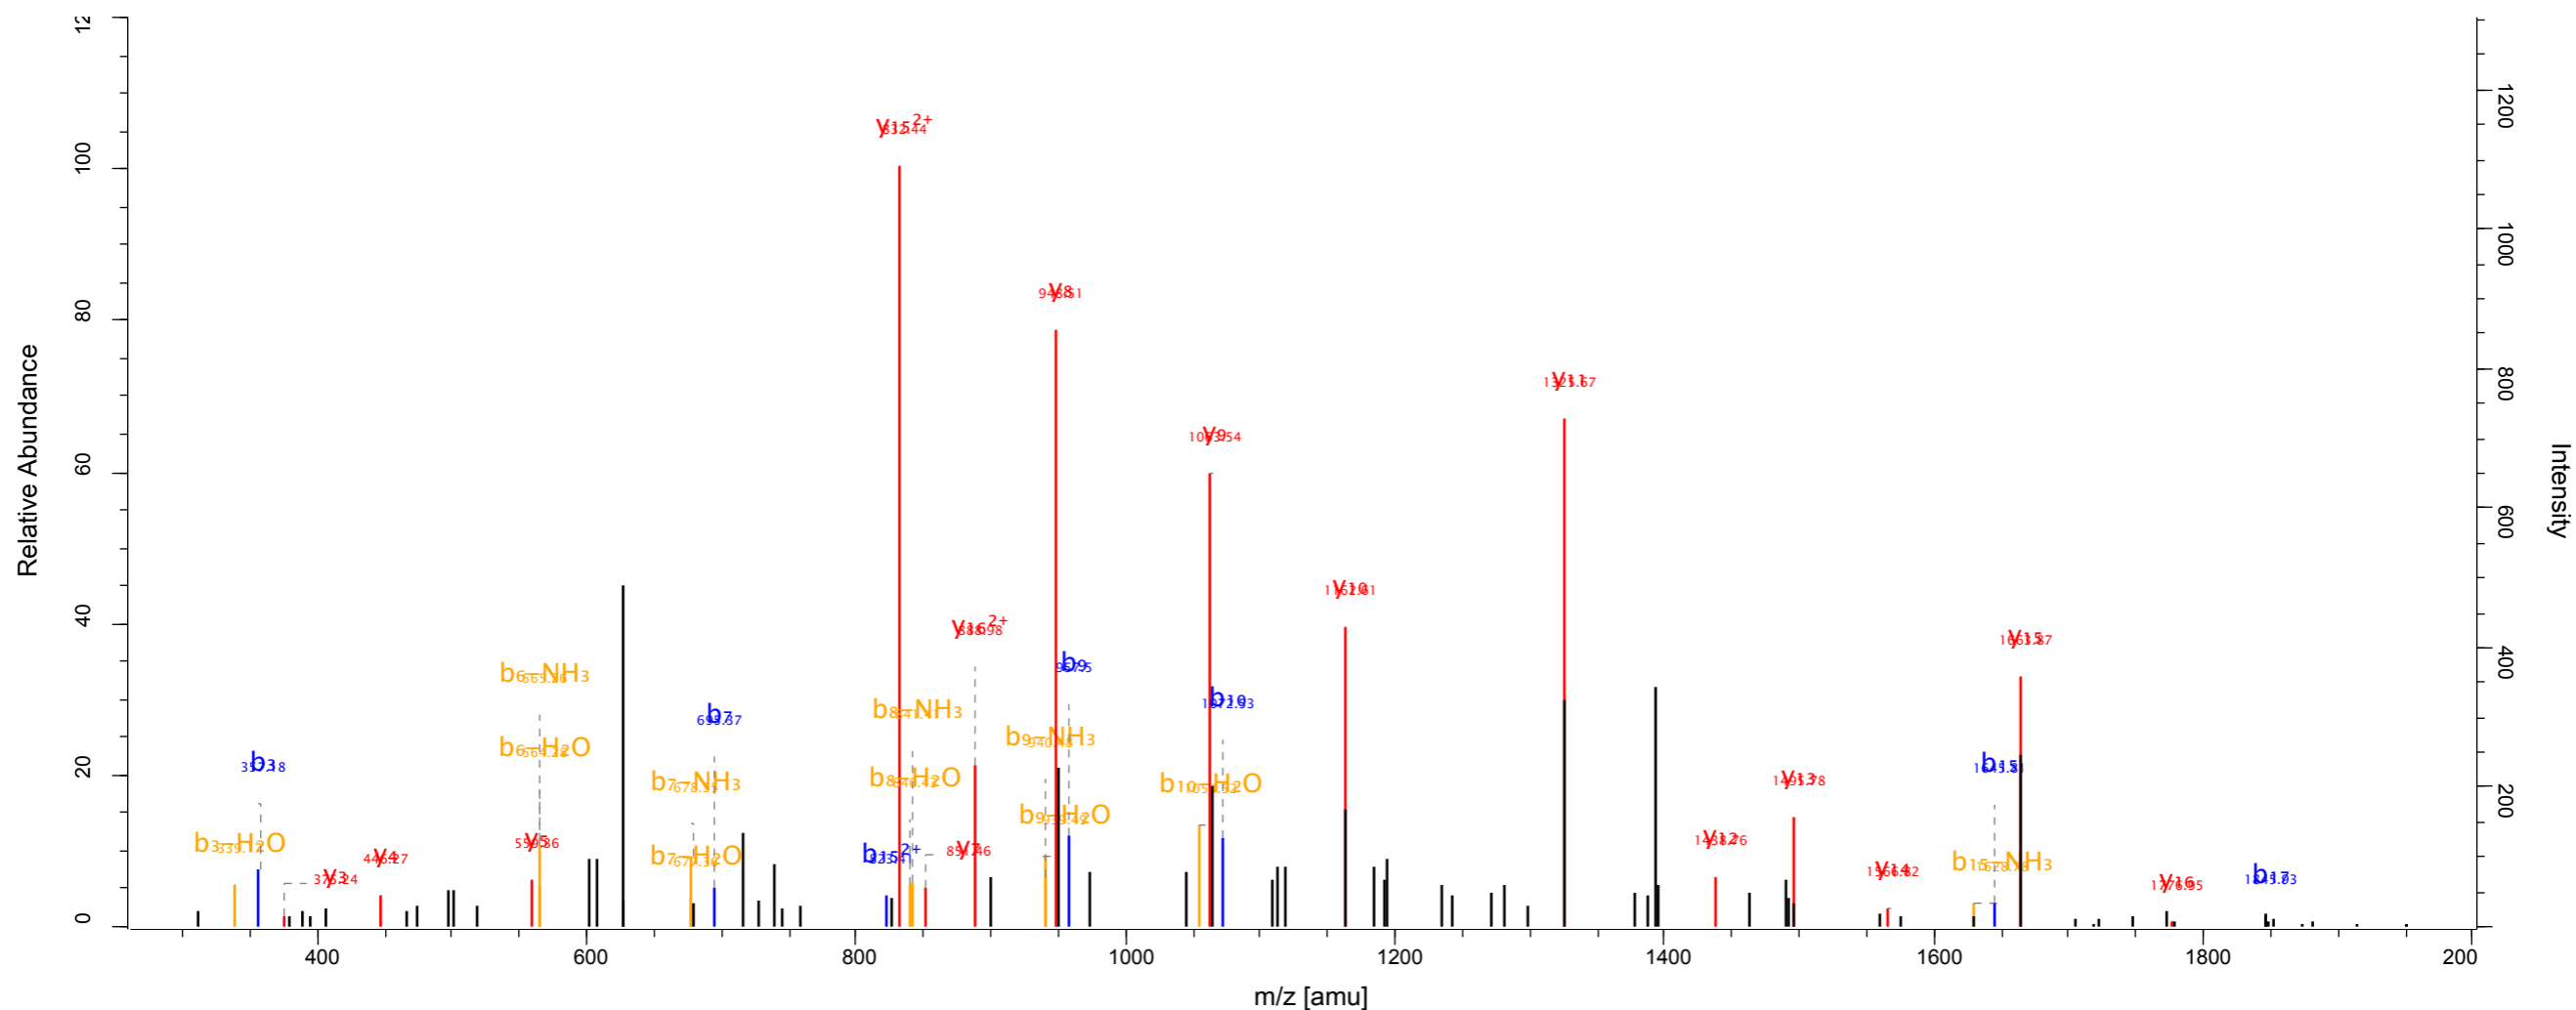

precursor information

|                   |                  |
|-------------------|------------------|
| Mass:             | 2010.02751       |
| m/z:              | 1010.52102       |
| Charge:           | 2+               |
| Potenttime:       | 118.622742286132 |
| Score:            | 140.0025         |
| Mass Error (ppm): | 1.8802           |
| DEP:              | 5.52265_06       |
| Precursor Type:   | ISO              |

| b <sup>2+</sup> ion |              | b ion      |              |    |     |    | y ion        |            | y <sup>2+</sup> ion |            |
|---------------------|--------------|------------|--------------|----|-----|----|--------------|------------|---------------------|------------|
| Δ dalton            | mass         | Δ dalton   | mass         |    | seq |    | Δ dalton     | mass       | Δ dalton            | mass       |
|                     | 129.06585398 |            | 129.06585398 | 1  | Q   | 17 |              |            |                     |            |
|                     | 244.09279701 |            | 244.09279701 | 2  | D   | 16 | 1891.9800057 |            | 1891.9800057        |            |
|                     | 357.17686099 | -0.1544916 | 357.17686099 | 3  | I   | 15 | 1776.9530626 | -0.0982042 | 888.98016955        | -0.1035826 |
|                     | 454.22962484 |            | 454.22962484 | 4  | P   | 14 | 1663.8689987 | -0.1260787 | 832.43813756        | -0.0212674 |
|                     | 525.26673863 |            | 525.26673863 | 5  | A   | 13 | 1566.8162348 | -0.1978266 | 1566.8162348        |            |
|                     | 582.28820235 |            | 582.28820235 | 6  | G   | 12 | 1495.779121  | -0.1325146 | 1495.779121         |            |
|                     | 695.37226633 | +0.0098137 | 695.37226633 | 7  | I   | 11 | 1438.7576573 | -0.1757481 | 1438.7576573        |            |
|                     | 858.43559487 |            | 858.43559487 | 8  | Y   | 10 | 1325.6735933 | -0.2033785 | 1325.6735933        |            |
|                     | 957.50400879 | -0.2569385 | 957.50400879 | 9  | V   | 9  | 1162.6102648 | -0.2247667 | 1162.6102648        |            |
|                     | 1072.5309518 | -0.1987985 | 1072.5309518 | 10 | D   | 8  | 1063.5418509 | -0.2158011 | 1063.5418509        |            |
|                     | 1169.5837157 |            | 1169.5837157 | 11 | P   | 7  | 948.51490783 | -0.2354889 | 948.51490783        |            |
|                     | 1332.6470442 |            | 1332.6470442 | 12 | Y   | 6  | 851.46214397 | +0.0849752 | 851.46214397        |            |
|                     | 1461.6896373 |            | 1461.6896373 | 13 | E   | 5  | 688.39881544 |            | 688.39881544        |            |
|                     | 1574.7737013 |            | 1574.7737013 | 14 | I   | 4  | 559.35622234 | -0.0988981 | 559.35622234        |            |
| -0.192493           | 823.40904577 | -0.0414059 | 1645.8108151 | 15 | A   | 3  | 446.27215836 | -0.0499904 | 446.27215836        |            |
|                     | 1732.8428435 |            | 1732.8428435 | 16 | S   | 2  | 375.23504457 | +0.0604877 | 375.23504457        |            |
|                     | 1845.9269075 | -0.1245393 | 1845.9269075 | 17 | I   | 1  | 288.20301616 |            | 288.20301616        |            |
|                     |              |            |              | 18 | R   | 0  | 175.11895218 |            | 175.11895218        |            |

general information

|                       |            |
|-----------------------|------------|
| Annotation:           | 14 of 18   |
| AminoAcids Coverage:  | 78%        |
| Intensity Coverage:   | 58%        |
| Peak Coverage:        | 24%        |
| Protein Localisation: | 83 ... 100 |

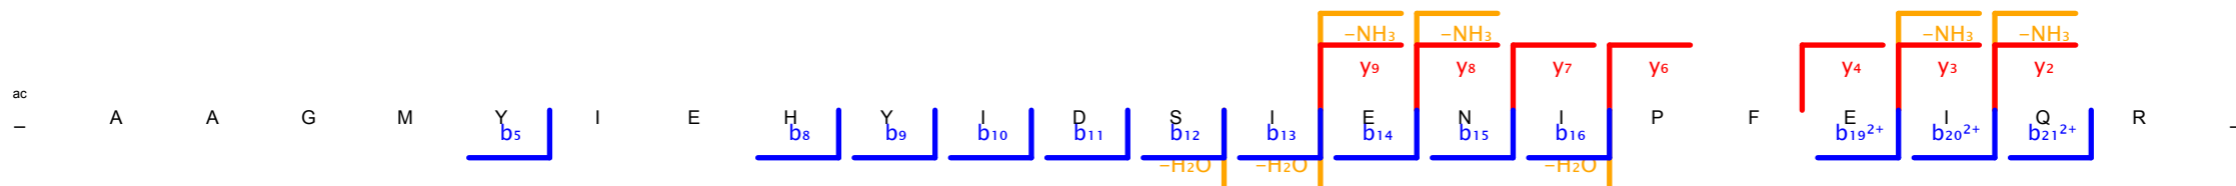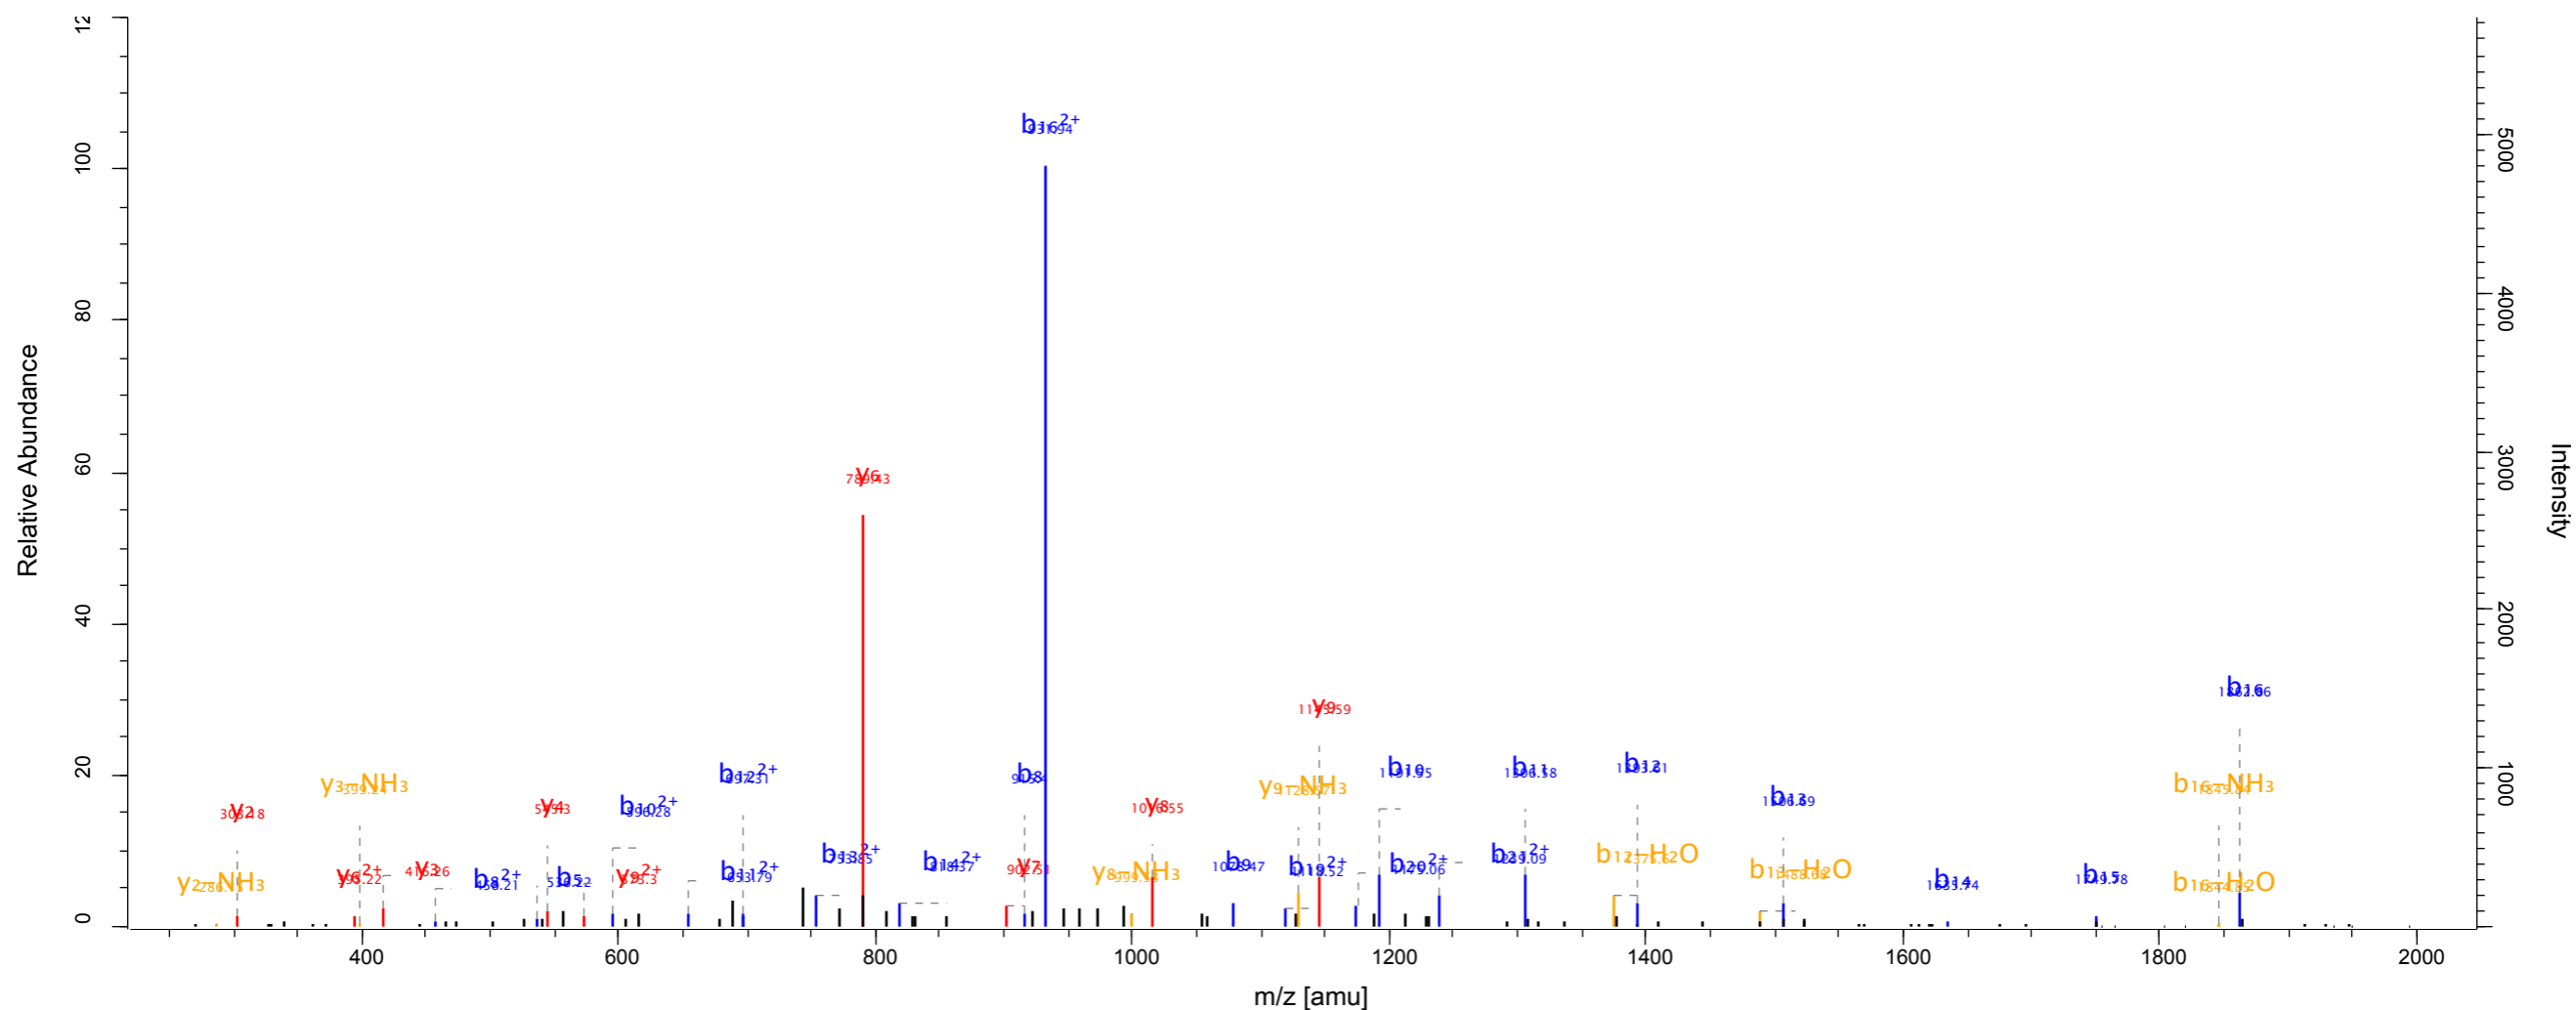

precursor information

|                   |                   |
|-------------------|-------------------|
| Mass:             | 2650.27555        |
| m/z:              | 884.42246         |
| Charge:           | 2                 |
| Potentialtime:    | 1.21.004426645508 |
| Score:            | 212.0528          |
| Mass Error (ppm): | 0.68422           |
| DEP:              | 2.2272E-52        |
| Precursor Type:   | ISO               |

| b <sup>2+</sup> ion |              | b ion      |              |    |     |    | y ion        |            | y <sup>2+</sup> ion |            |
|---------------------|--------------|------------|--------------|----|-----|----|--------------|------------|---------------------|------------|
| Δ dalton            | mass         | Δ dalton   | mass         |    | seq |    | Δ dalton     | mass       | Δ dalton            | mass       |
|                     | 114.05495494 |            | 114.05495494 | 1  | A   | 21 |              |            |                     |            |
|                     | 185.09206873 |            | 185.09206873 | 2  | A   | 20 | 2538.2333366 |            | 2538.2333366        |            |
|                     | 242.11353245 |            | 242.11353245 | 3  | G   | 19 | 2467.1962228 |            | 2467.1962228        |            |
|                     | 373.15401706 |            | 373.15401706 | 4  | M   | 18 | 2410.1747591 |            | 2410.1747591        |            |
|                     | 536.2173456  | -0.2442621 | 536.2173456  | 5  | Y   | 17 | 2279.1342745 |            | 2279.1342745        |            |
|                     | 649.30140958 |            | 649.30140958 | 6  | I   | 16 | 2116.0709459 |            | 2116.0709459        |            |
|                     | 778.34400267 |            | 778.34400267 | 7  | E   | 15 | 2002.986882  |            | 2002.986882         |            |
| -0.0690481          | 458.2050955  | -0.160727  | 915.40291454 | 8  | H   | 14 | 1873.9442889 |            | 1873.9442889        |            |
|                     | 1078.4662431 | -0.2886308 | 1078.4662431 | 9  | Y   | 13 | 1736.885377  |            | 1736.885377         |            |
| -0.3392776          | 596.27879176 | -0.2647846 | 1191.5503071 | 10 | I   | 12 | 1573.8220485 |            | 1573.8220485        |            |
| +0.4333837          | 653.79226328 | -0.2208048 | 1306.5772501 | 11 | D   | 11 | 1460.7379845 |            | 1460.7379845        |            |
| +0.1949574          | 697.30827748 | -0.1158703 | 1393.6092785 | 12 | S   | 10 | 1345.7110415 |            | 1345.7110415        |            |
| -0.198393           | 753.85030947 | -0.3028395 | 1506.6933425 | 13 | I   | 9  | 1258.679013  |            | 1258.679013         |            |
| -0.2527095          | 818.37160602 | -0.1531719 | 1635.7359356 | 14 | E   | 8  | 1145.5949491 | -0.2333768 | 573.30111276        | -0.0595356 |
|                     | 1749.778863  | -0.1845027 | 1749.778863  | 15 | N   | 7  | 1016.552356  | -0.2015259 | 1016.552356         |            |
| -0.0455143          | 931.93510173 | -0.1867795 | 1862.862927  | 16 | I   | 6  | 902.50942852 | -0.1450486 | 902.50942852        |            |
|                     | 1959.9156909 |            | 1959.9156909 | 17 | P   | 5  | 789.42536454 | -0.17451   | 395.2163205         | -0.0081906 |
|                     | 2106.9841048 |            | 2106.9841048 | 18 | F   | 4  | 692.37260069 |            | 692.37260069        |            |
| -0.251118           | 1118.5169872 |            | 2236.0266979 | 19 | E   | 3  | 545.30418677 | -0.0601072 | 545.30418677        |            |
| -0.2511578          | 1175.0590192 |            | 2349.1107618 | 20 | I   | 2  | 416.26159367 | -0.0869111 | 416.26159367        |            |
| -0.0377708          | 1239.0883079 |            | 2477.1693394 | 21 | Q   | 1  | 303.17752969 | +0.0078341 | 303.17752969        |            |
|                     |              |            |              | 22 | R   | 0  | 175.11895218 |            | 175.11895218        |            |

general information

|                       |          |
|-----------------------|----------|
| Annotation:           | 14 of 22 |
| AminoAcids Coverage:  | 64 %     |
| Intensity Coverage:   | 77 %     |
| Peak Coverage:        | 25 %     |
| Protein Localisation: | 2 ... 23 |

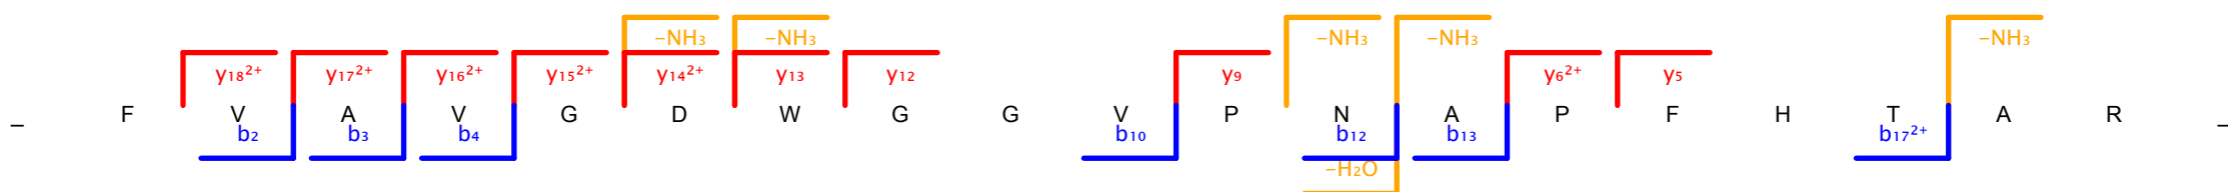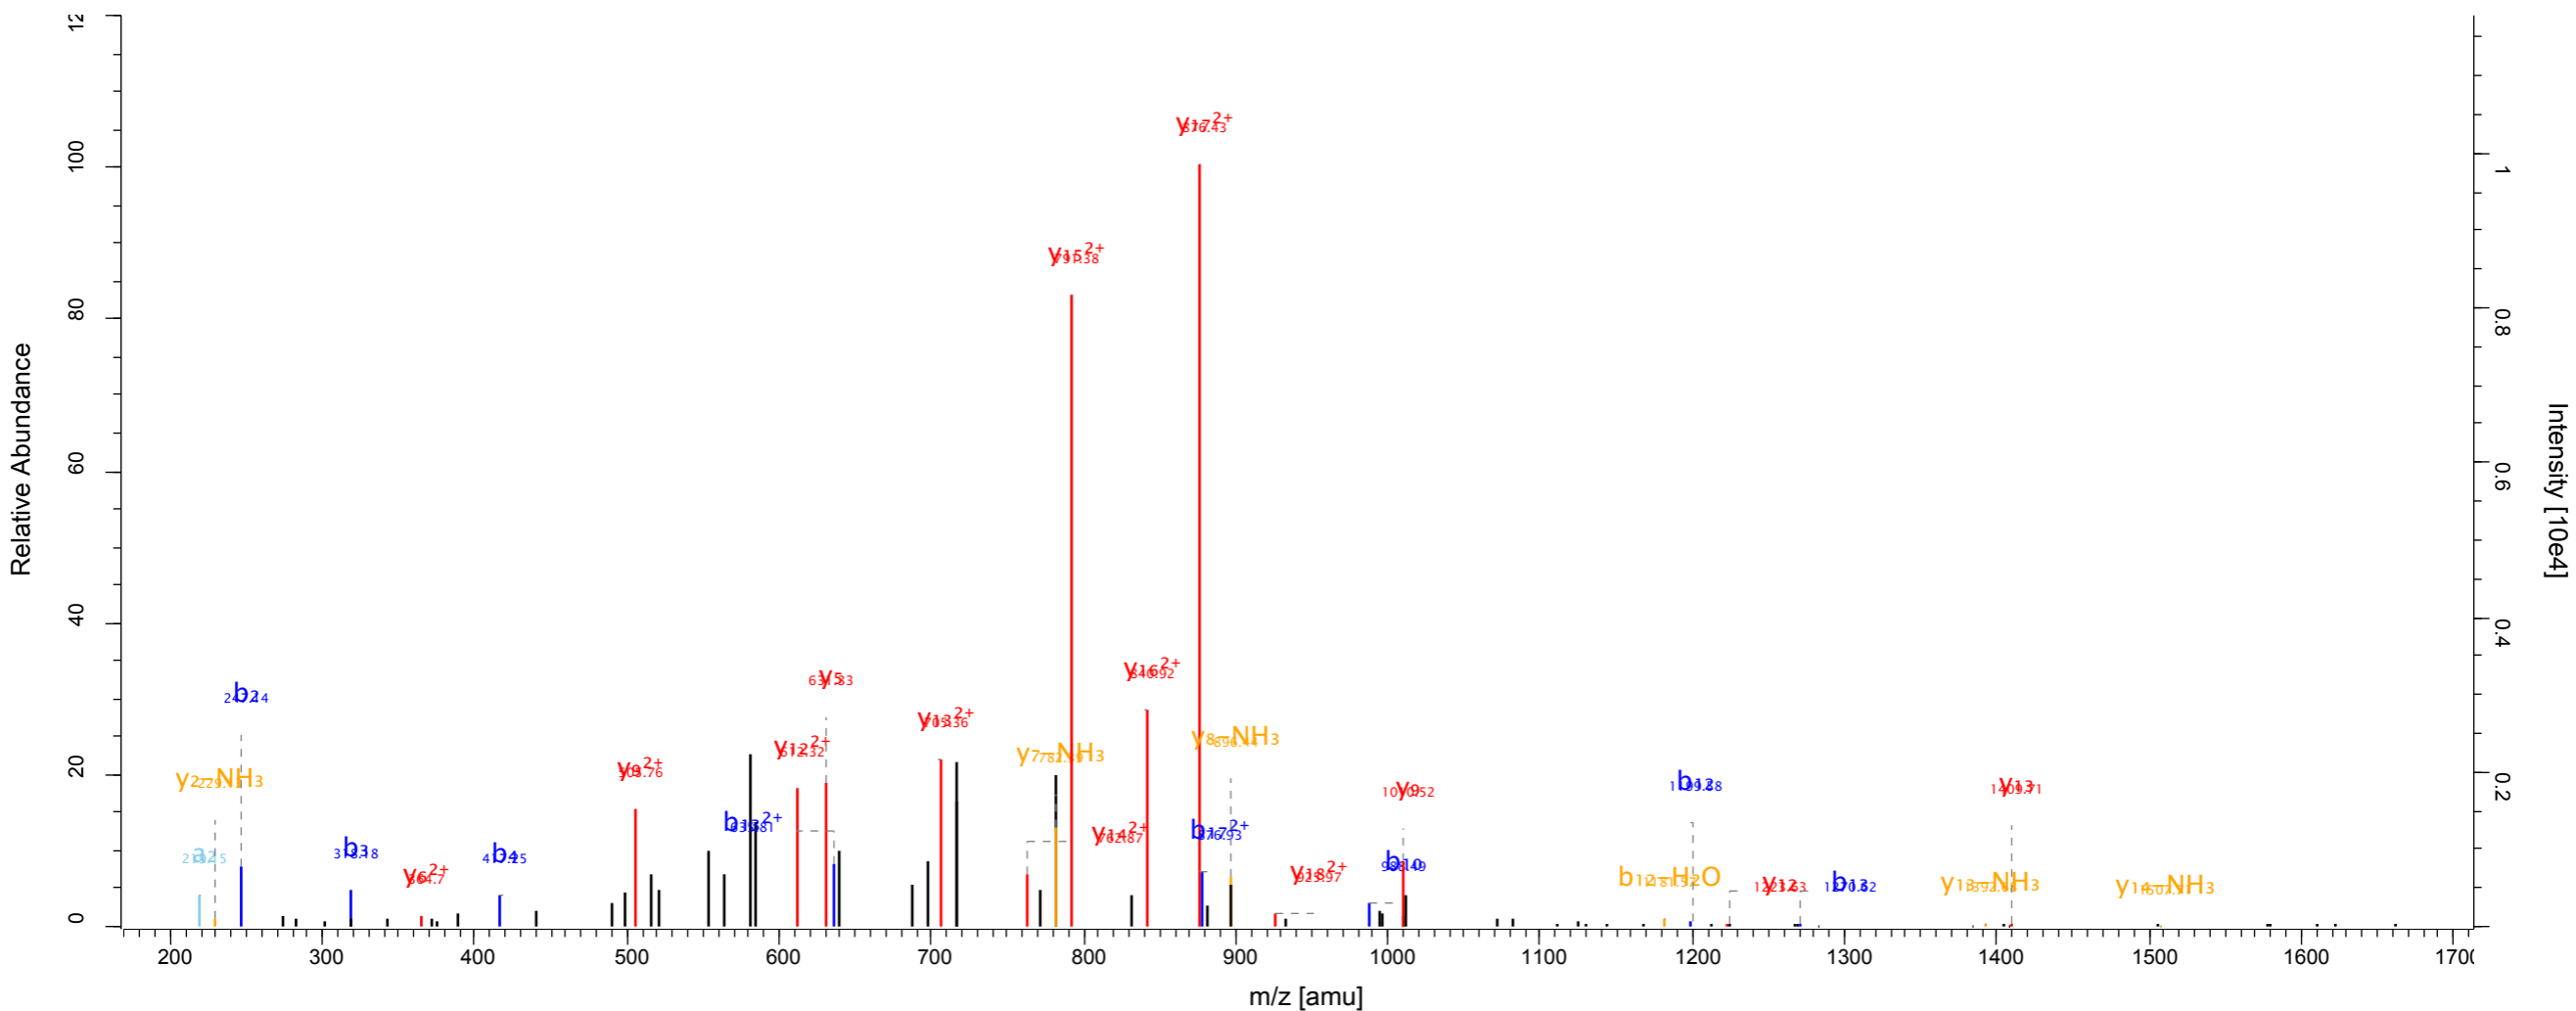

precursor information

|                   |                  |
|-------------------|------------------|
| Mass:             | 1006.00182       |
| m/z:              | 666.67122        |
| Charge:           | 2+               |
| RetentionTime:    | 02.4604212867188 |
| Score:            | 127.4550         |
| Mass Error [ppm]: | 0.5277           |
| DEP:              | 1.2214E-05       |
| Precursor Type:   | ISO              |

general information

|                       |           |
|-----------------------|-----------|
| Annotation:           | 15 of 10  |
| AminoAcids Coverage:  | 70%       |
| Intensity Coverage:   | 65%       |
| Peak Coverage:        | 24%       |
| Protein Localisation: | 28 ... 46 |

| a ion    |            | b <sup>2+</sup> ion |            | b ion      |            |    |     |    | y ion      |            | y <sup>2+</sup> ion |            |
|----------|------------|---------------------|------------|------------|------------|----|-----|----|------------|------------|---------------------|------------|
| Δ dalton | mass       | Δ dalton            | mass       | Δ dalton   | mass       |    | seq |    | Δ dalton   | mass       | Δ dalton            | mass       |
|          | 120.080776 |                     | 148.07569  |            | 148.07569  | 1  | F   | 18 |            |            |                     |            |
| +0.12025 | 219.14919  |                     | 247.144104 | +0.0279233 | 247.144104 | 2  | V   | 17 | 1850.92964 |            | 925.968459          | -0.2097311 |
|          | 290.186303 |                     | 318.181218 | +0.0301467 | 318.181218 | 3  | A   | 16 | 1751.86123 |            | 876.434252          | +0.0283943 |
|          | 389.254717 |                     | 417.249632 | -0.1304303 | 417.249632 | 4  | V   | 15 | 1680.82411 |            | 840.915695          | +0.0930938 |
|          | 446.276181 |                     | 474.271096 |            | 474.271096 | 5  | G   | 14 | 1581.7557  |            | 791.381488          | +0.1321225 |
|          | 561.303124 |                     | 589.298039 |            | 589.298039 | 6  | D   | 13 | 1524.73424 |            | 762.870756          | -0.2099899 |
|          | 747.382437 |                     | 775.377352 |            | 775.377352 | 7  | W   | 12 | 1409.70729 | +0.0109682 | 705.357285          | +0.1164089 |
|          | 804.403901 |                     | 832.398815 |            | 832.398815 | 8  | G   | 11 | 1223.62798 | -0.4186299 | 612.317628          | +0.0487655 |
|          | 861.425365 |                     | 889.420279 |            | 889.420279 | 9  | G   | 10 | 1166.60652 |            | 1166.60652          |            |
|          | 960.493778 |                     | 988.488693 | -0.1254118 | 988.488693 | 10 | V   | 9  | 1109.58505 |            | 1109.58505          |            |
|          | 1057.54654 |                     | 1085.54146 |            | 1085.54146 | 11 | P   | 8  | 1010.51664 | -0.1178965 | 505.761958          | +0.1226857 |
|          | 1171.58947 |                     | 1199.58438 | -0.0410494 | 1199.58438 | 12 | N   | 7  | 913.463875 |            | 913.463875          |            |
|          | 1242.62658 | -0.4204664          | 635.814387 | -0.3125382 | 1270.6215  | 13 | A   | 6  | 799.420948 |            | 799.420948          |            |
|          | 1339.67935 |                     | 1367.67426 |            | 1367.67426 | 14 | P   | 5  | 728.383834 |            | 364.695555          | +0.256227  |
|          | 1486.74776 |                     | 1514.74268 |            | 1514.74268 | 15 | F   | 4  | 631.33107  | +0.1645963 | 631.33107           |            |
|          | 1623.80667 |                     | 1651.80159 |            | 1651.80159 | 16 | H   | 3  | 484.262656 |            | 484.262656          |            |
|          | 1724.85435 | +0.4329957          | 876.928271 |            | 1752.84927 | 17 | T   | 2  | 347.203744 |            | 347.203744          |            |
|          | 1795.89147 |                     | 1823.88638 |            | 1823.88638 | 18 | A   | 1  | 246.156066 |            | 246.156066          |            |
|          |            |                     |            |            |            | 19 | R   | 0  | 175.118952 |            | 175.118952          |            |

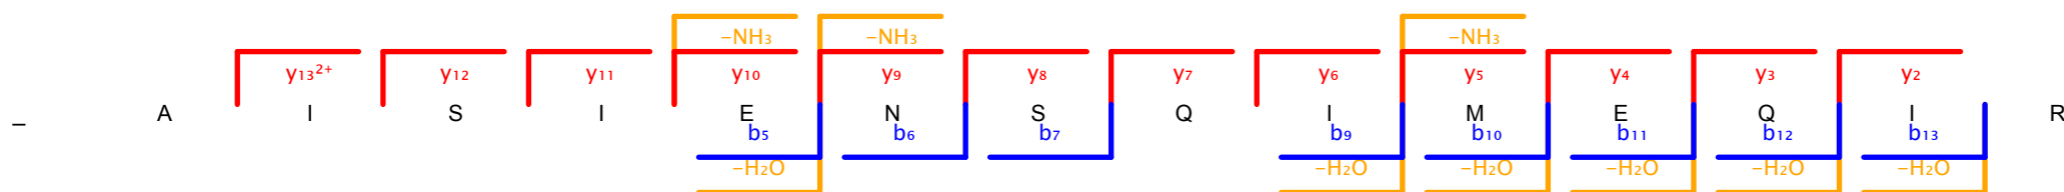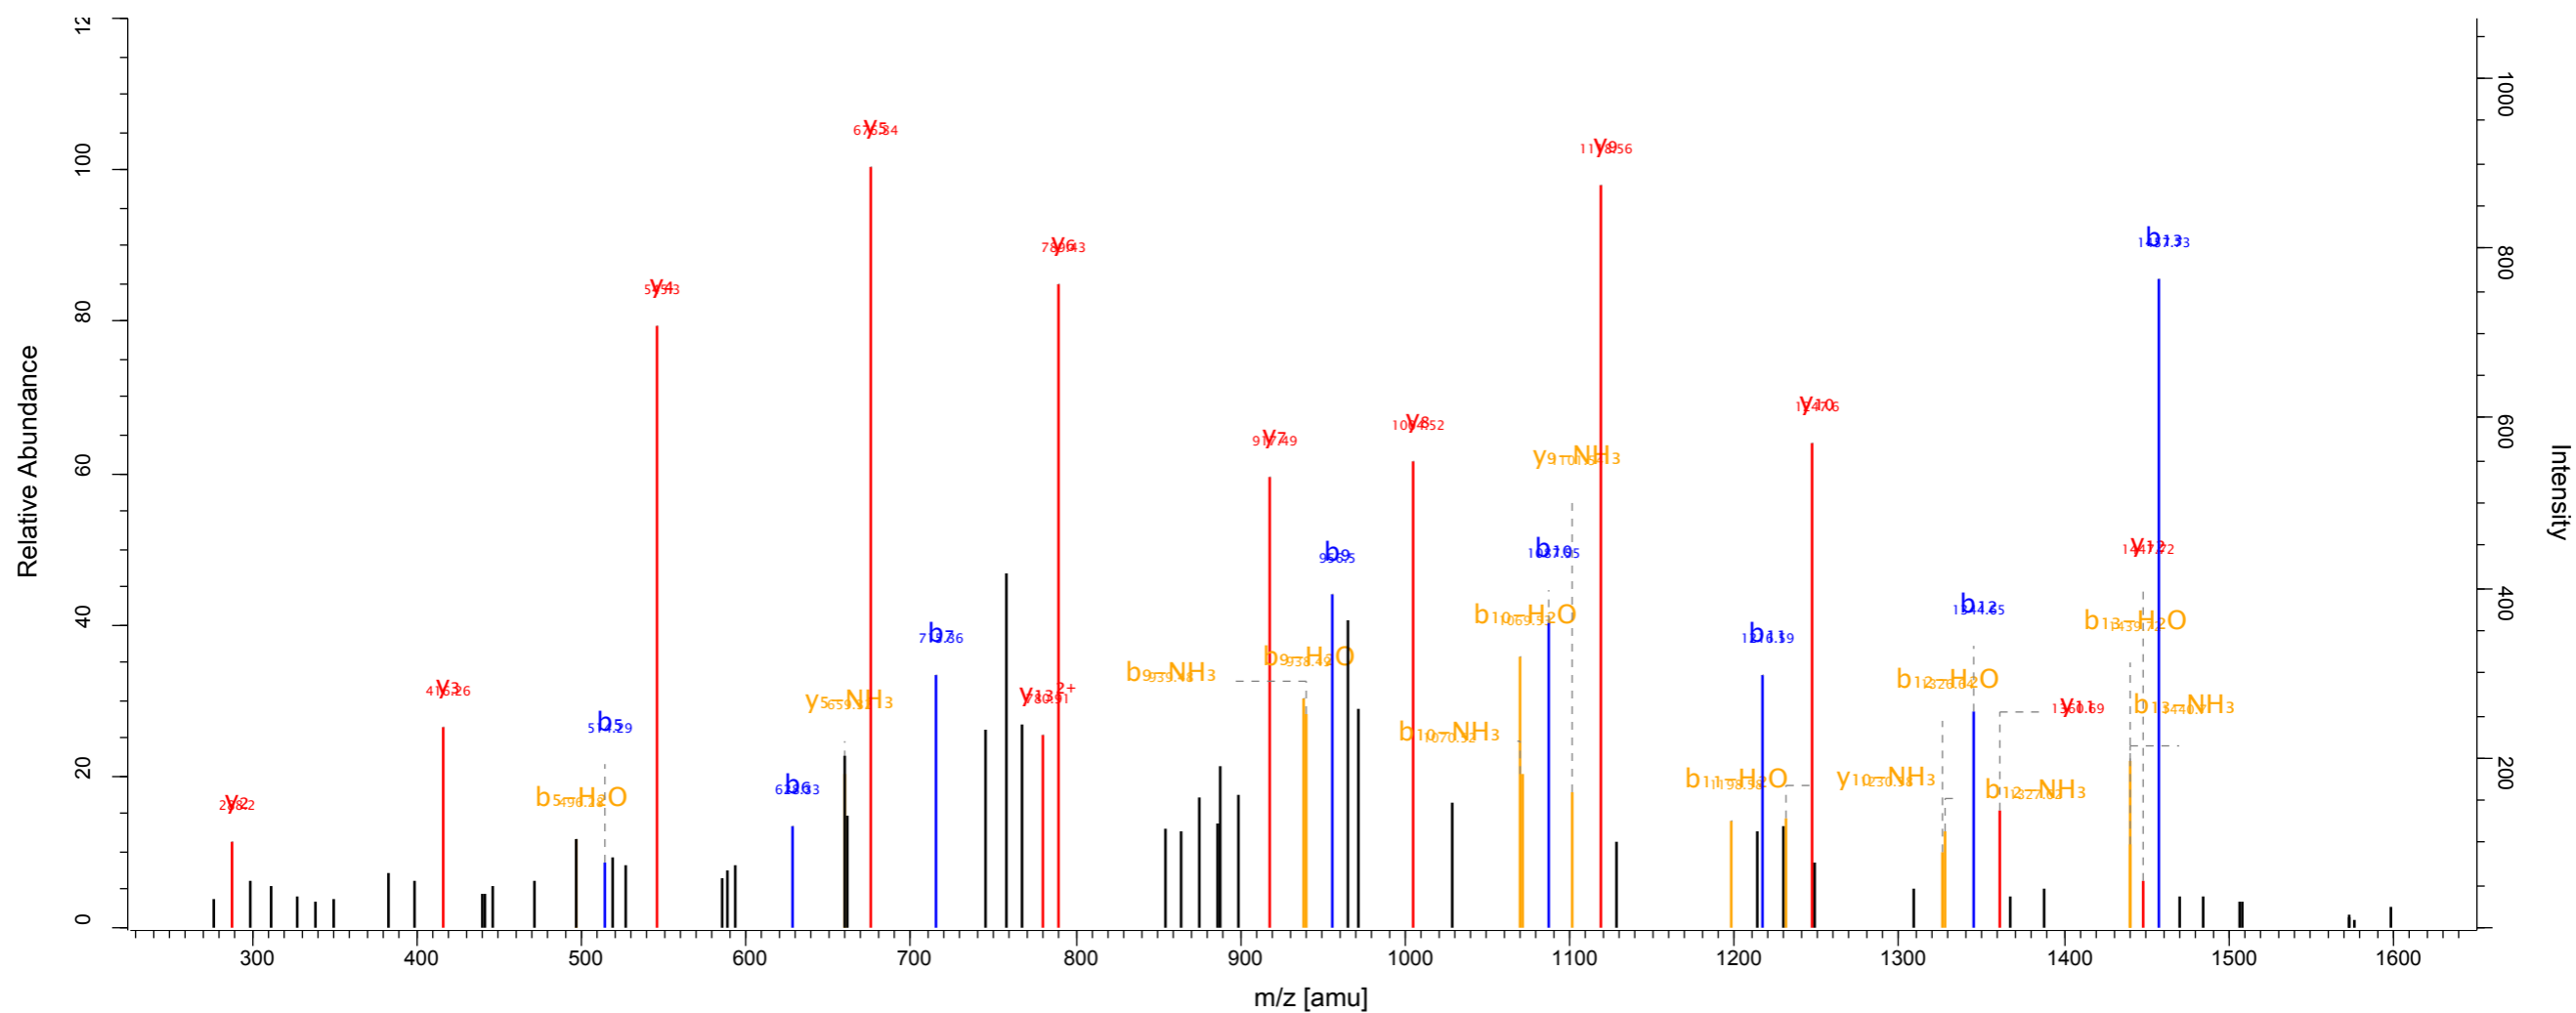

precursor information

|                   |                  |
|-------------------|------------------|
| Mass:             | 1620.8255        |
| m/z:              | 816.42502        |
| Charge:           | 2+               |
| Potentiation:     | 02.1270004541016 |
| Score:            | 220.0557         |
| Mass Error [ppm]: | 0.20755          |
| PEP:              | 2.8408E-22       |
| Precursor Type:   | ISO              |

general information

|                       |           |
|-----------------------|-----------|
| Annotation:           | 12 of 14  |
| AminoAcids Coverage:  | 86 %      |
| Intensity Coverage:   | 60 %      |
| Peak Coverage:        | 41 %      |
| Protein Localisation: | 18 ... 31 |

| b ion      |                |    |     |    | y ion          |            | y <sup>2+</sup> ion |            |
|------------|----------------|----|-----|----|----------------|------------|---------------------|------------|
| Δ dalton   | mass           |    | seq |    | Δ dalton       | mass       | Δ dalton            | mass       |
|            | 72.044390254   | 1  | A   | 13 |                |            |                     |            |
|            | 185.128454235  | 2  | I   | 12 | 1560.805018191 |            | 780.906147329       | -0.3304027 |
|            | 272.160482645  | 3  | S   | 11 | 1447.720954211 | -0.0638497 | 1447.720954211      |            |
|            | 385.244546625  | 4  | I   | 10 | 1360.688925801 | +0.02604   | 1360.688925801      |            |
| +0.076874  | 514.287139721  | 5  | E   | 9  | 1247.60486182  | -0.0092808 | 1247.60486182       |            |
| +0.1906237 | 628.330067168  | 6  | N   | 8  | 1118.562268724 | +0.1141229 | 1118.562268724      |            |
| +0.2555192 | 715.362095578  | 7  | S   | 7  | 1004.519341277 | +6.9E-06   | 1004.519341277      |            |
|            | 843.42067309   | 8  | Q   | 6  | 917.487312867  | +0.0546183 | 917.487312867       |            |
| +0.0255364 | 956.50473707   | 9  | I   | 5  | 789.428735356  | +0.012793  | 789.428735356       |            |
| -0.0129951 | 1087.545221676 | 10 | M   | 4  | 676.344671375  | +0.145502  | 676.344671375       |            |
| -0.0145726 | 1216.587814773 | 11 | E   | 3  | 545.304186769  | +0.0466433 | 545.304186769       |            |
| -0.0304255 | 1344.646392284 | 12 | Q   | 2  | 416.261593673  | +0.1351959 | 416.261593673       |            |
| -0.2264279 | 1457.730456264 | 13 | I   | 1  | 288.203016161  | +0.0841237 | 288.203016161       |            |
|            |                | 14 | R   | 0  | 175.118952181  |            | 175.118952181       |            |

Scan number 2088 Raw file 20080721\_Orbi1\_SaZa\_SA\_ADH\_Matrigel\_Exp\_1\_Susp\_InGel\_05  
 Method ITMS; CID Genenames ZNF511

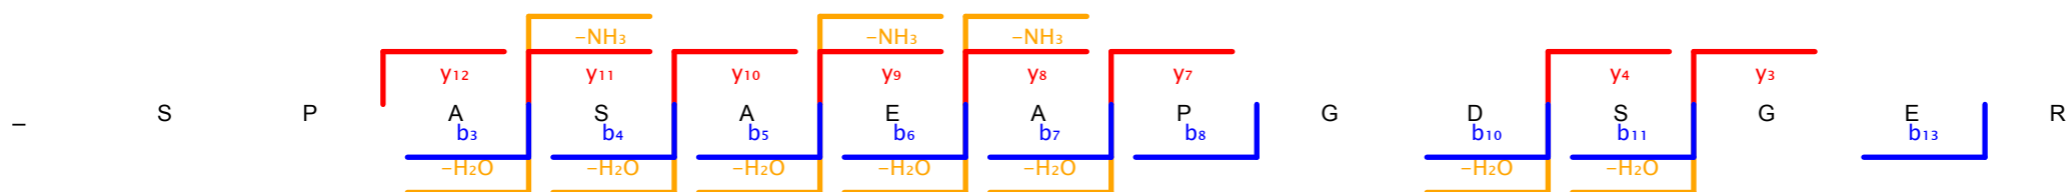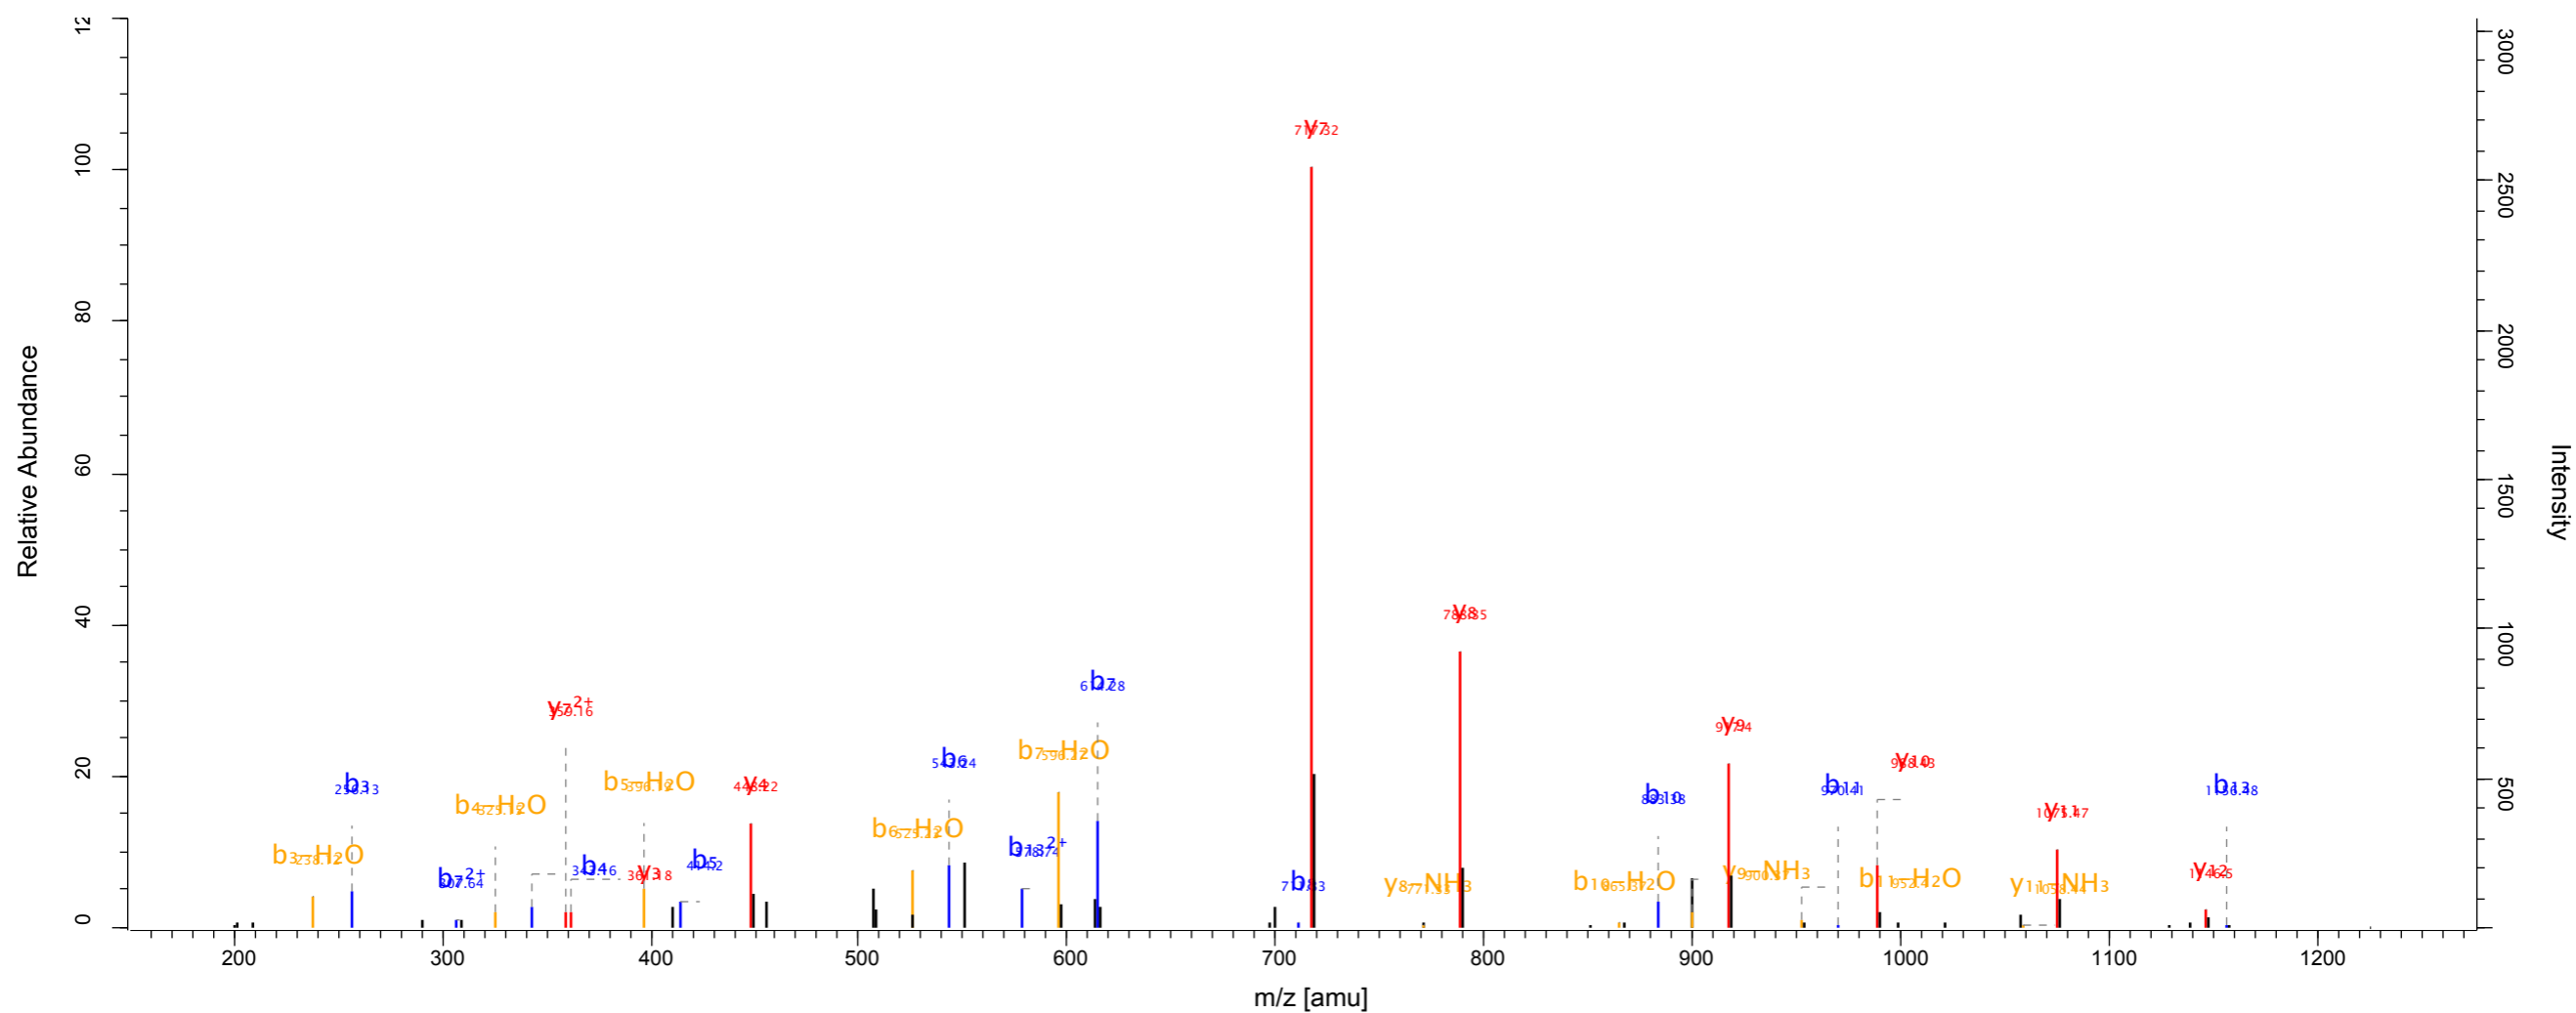

precursor information

|                   |                  |
|-------------------|------------------|
| Mass:             | 1220.58028       |
| m/z:              | 665.70742        |
| Charge:           | 2+               |
| Retention time:   | 28.6740036010742 |
| Score:            | 206.262          |
| Mass Error (ppm): | 0.44876          |
| RFQ:              | 1.004E-17        |
| Precursor Type:   | ISO              |

general information

|                       |             |
|-----------------------|-------------|
| Annotation:           | 10 of 14    |
| AminoAcids Coverage:  | 71 %        |
| Intensity Coverage:   | 74 %        |
| Peak Coverage:        | 46 %        |
| Protein Localisation: | 185 ... 198 |

| b <sup>2+</sup> ion |              | b ion      |              |    |     |    | y ion        |            | y <sup>2+</sup> ion |           |
|---------------------|--------------|------------|--------------|----|-----|----|--------------|------------|---------------------|-----------|
| Δ dalton            | mass         | Δ dalton   | mass         |    | seq |    | Δ dalton     | mass       | Δ dalton            | mass      |
|                     | 88.039304876 |            | 88.039304876 | 1  | S   | 13 |              |            |                     |           |
|                     | 185.09206873 |            | 185.09206873 | 2  | P   | 12 | 1243.5549347 |            | 1243.5549347        |           |
|                     | 256.12918252 | +0.1169418 | 256.12918252 | 3  | A   | 11 | 1146.5021709 | +0.0266377 | 1146.5021709        |           |
|                     | 343.16121093 | +0.0796338 | 343.16121093 | 4  | S   | 10 | 1075.4650571 | +0.0882876 | 1075.4650571        |           |
|                     | 414.19832471 | +0.0938506 | 414.19832471 | 5  | A   | 9  | 988.43302869 | -0.011703  | 988.43302869        |           |
|                     | 543.24091781 | +0.1011232 | 543.24091781 | 6  | E   | 8  | 917.3959149  | +0.0804035 | 917.3959149         |           |
| -0.363113           | 307.64265403 | +0.0536334 | 614.2780316  | 7  | A   | 7  | 788.35332181 | +0.1223252 | 788.35332181        |           |
|                     | 711.33079545 | -0.0793306 | 711.33079545 | 8  | P   | 6  | 717.31620802 | +0.0647124 | 359.16174224        | +0.050416 |
|                     | 768.35225917 |            | 768.35225917 | 9  | G   | 5  | 620.26344417 |            | 620.26344417        |           |
|                     | 883.37920221 | +0.0478608 | 883.37920221 | 10 | D   | 4  | 563.24198044 |            | 563.24198044        |           |
|                     | 970.41123062 | +0.3505492 | 970.41123062 | 11 | S   | 3  | 448.21503741 | +0.0610856 | 448.21503741        |           |
|                     | 1027.4326943 |            | 1027.4326943 | 12 | G   | 2  | 361.183009   | +0.0405017 | 361.183009          |           |
| -0.3382058          | 578.74128195 | +0.1891413 | 1156.4752874 | 13 | E   | 1  | 304.16154528 |            | 304.16154528        |           |
|                     |              |            |              | 14 | R   | 0  | 175.11895218 |            | 175.11895218        |           |

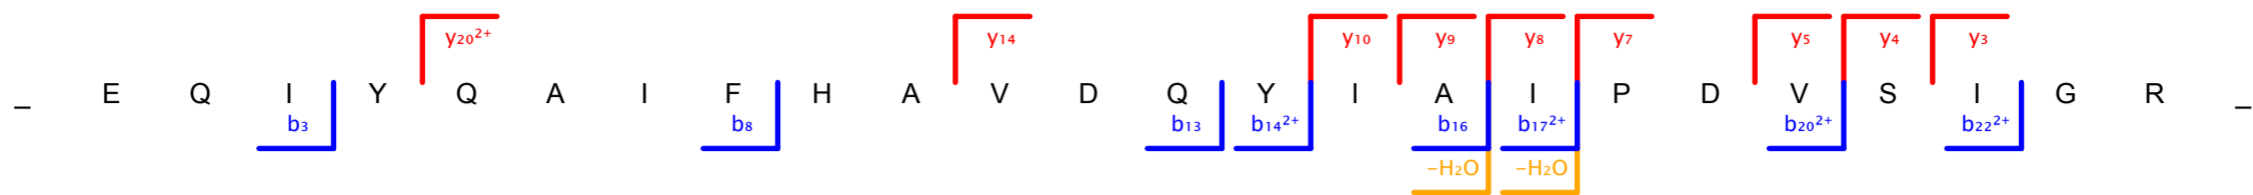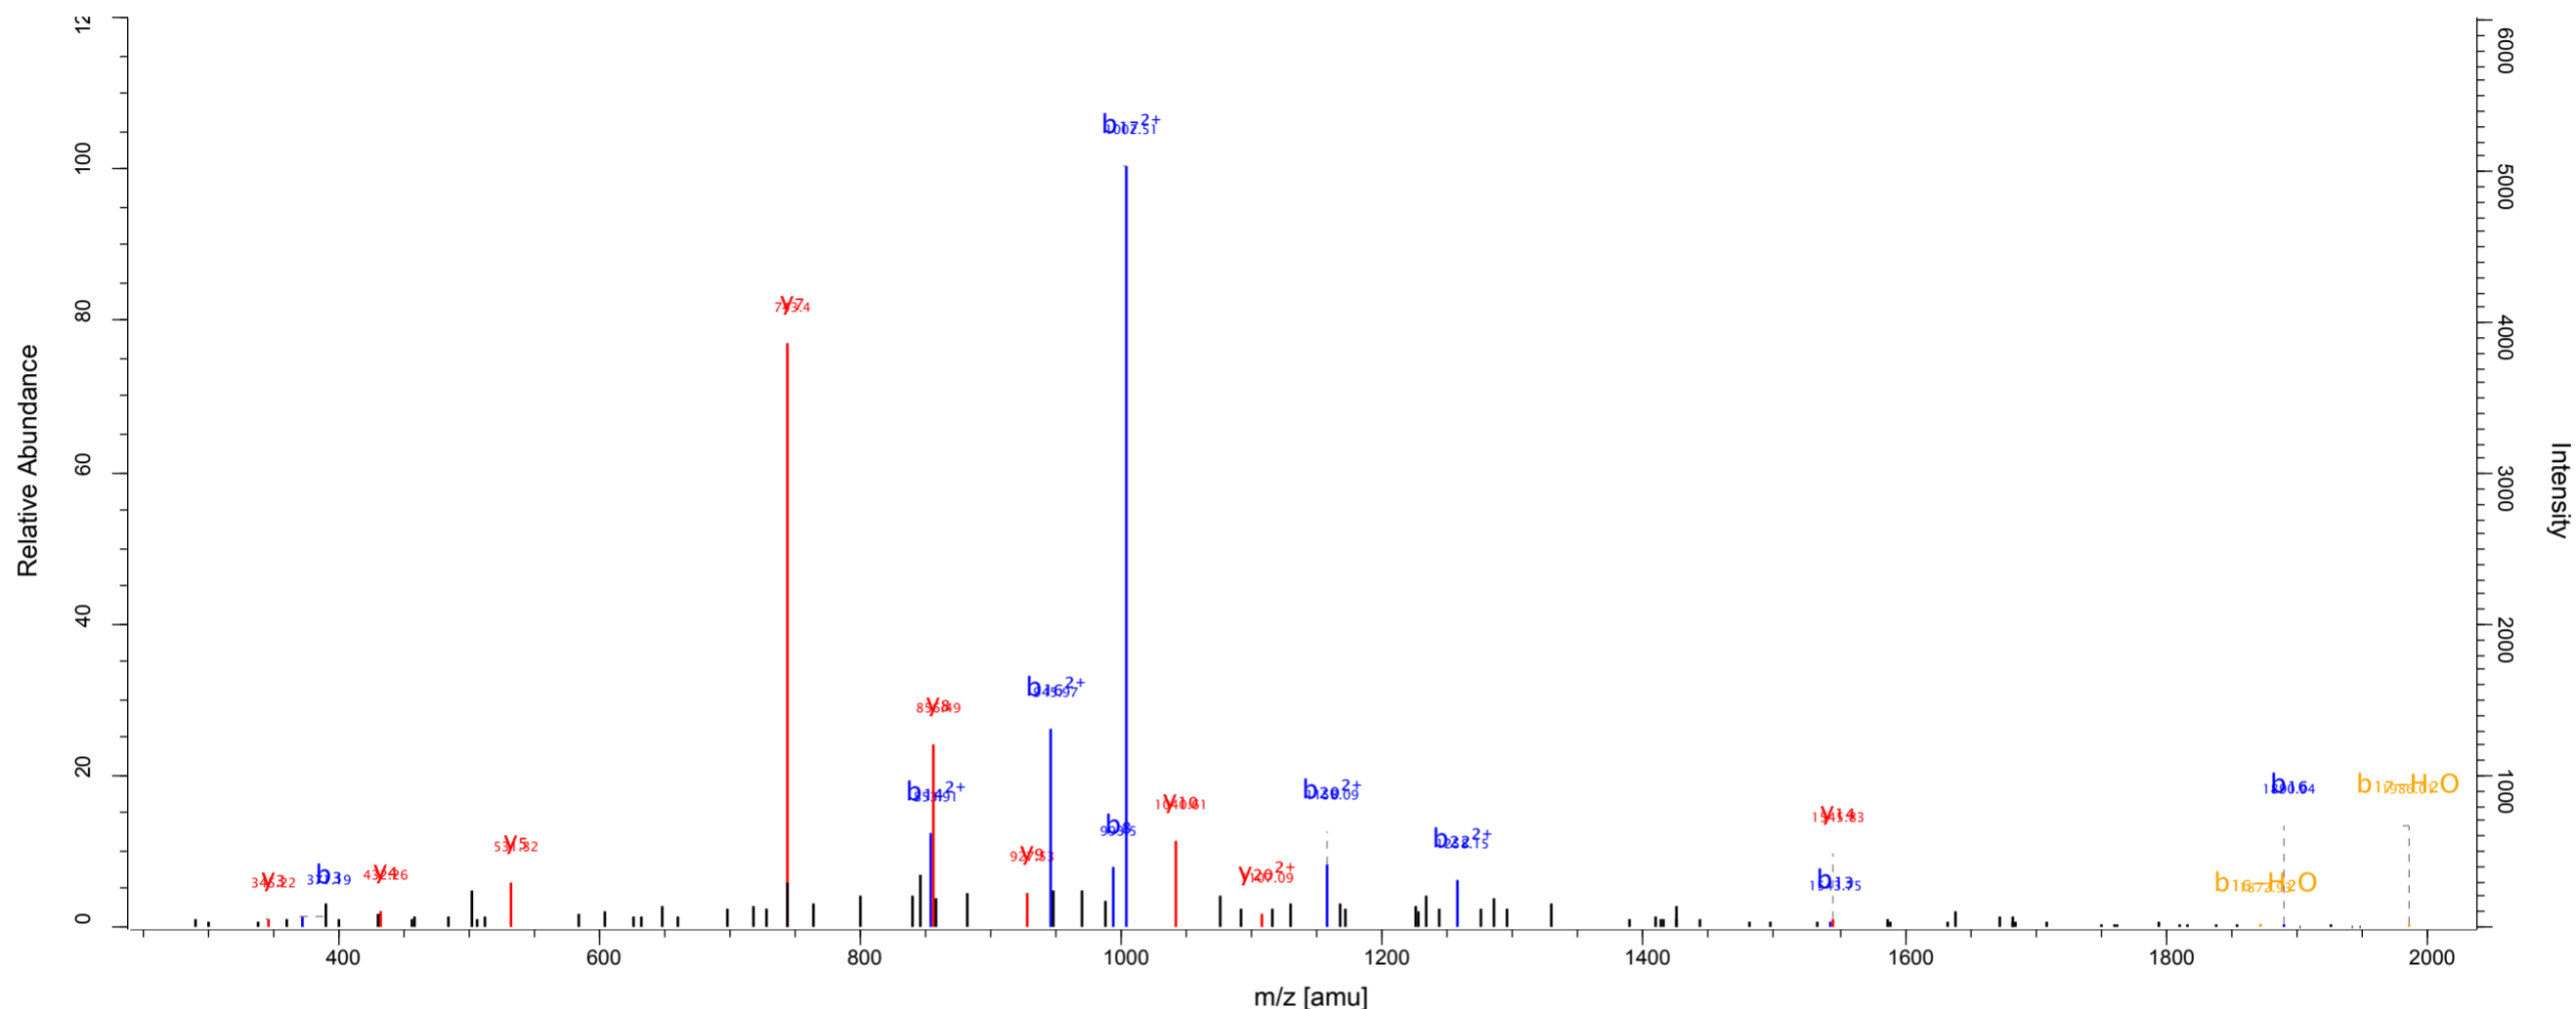

precursor information

|                   |                  |
|-------------------|------------------|
| Mass:             | 2745.41400       |
| m/z:              | 616.14521        |
| Charge:           | 2+               |
| Retention time:   | 120.188064575105 |
| Score:            | 70.45206         |
| Mass Error (ppm): | 0.52617          |
| DEP:              | 0.00011201       |
| Precursor Type:   | MULTI            |

| b <sup>2+</sup> ion |              | b ion      |              |    |     |    | y ion        |            | y <sup>2+</sup> ion |            |
|---------------------|--------------|------------|--------------|----|-----|----|--------------|------------|---------------------|------------|
| Δ dalton            | mass         | Δ dalton   | mass         |    | seq |    | Δ dalton     | mass       | Δ dalton            | mass       |
|                     | 130.04986956 |            | 130.04986956 | 1  | E   | 23 |              |            |                     |            |
|                     | 258.10844707 |            | 258.10844707 | 2  | Q   | 22 | 2617.3772987 |            | 2617.3772987        |            |
|                     | 371.19251105 | +0.2585998 | 371.19251105 | 3  | I   | 21 | 2489.3187212 |            | 2489.3187212        |            |
|                     | 534.25583959 |            | 534.25583959 | 4  | Y   | 20 | 2376.2346572 |            | 2376.2346572        |            |
|                     | 662.3144171  |            | 662.3144171  | 5  | Q   | 19 | 2213.1713287 |            | 1107.0893026        | -0.1171346 |
|                     | 733.35153089 |            | 733.35153089 | 6  | A   | 18 | 2085.1127512 |            | 2085.1127512        |            |
|                     | 846.43559487 |            | 846.43559487 | 7  | I   | 17 | 2014.0756374 |            | 2014.0756374        |            |
|                     | 993.50400879 | +0.342915  | 993.50400879 | 8  | F   | 16 | 1900.9915734 |            | 1900.9915734        |            |
|                     | 1130.5629207 |            | 1130.5629207 | 9  | H   | 15 | 1753.9231595 |            | 1753.9231595        |            |
|                     | 1201.6000344 |            | 1201.6000344 | 10 | A   | 14 | 1616.8642476 |            | 1616.8642476        |            |
|                     | 1300.6684484 |            | 1300.6684484 | 11 | V   | 13 | 1545.8271338 | -0.0342872 | 1545.8271338        |            |
|                     | 1415.6953914 |            | 1415.6953914 | 12 | D   | 12 | 1446.7587199 |            | 1446.7587199        |            |
|                     | 1543.7539689 | +0.1505721 | 1543.7539689 | 13 | Q   | 11 | 1331.7317769 |            | 1331.7317769        |            |
| +0.073736           | 853.91228695 |            | 1706.8172974 | 14 | Y   | 10 | 1203.6731994 |            | 1203.6731994        |            |
|                     | 1819.9013614 |            | 1819.9013614 | 15 | I   | 9  | 1040.6098708 | +0.2584153 | 1040.6098708        |            |
| -0.018347           | 945.97287584 | -0.1571031 | 1890.9384752 | 16 | A   | 8  | 927.52580686 | +0.1372791 | 927.52580686        |            |
| +0.1394501          | 1002.5149078 |            | 2004.0225392 | 17 | I   | 7  | 856.48869308 | -0.0491789 | 856.48869308        |            |
|                     | 2101.075303  |            | 2101.075303  | 18 | P   | 6  | 743.4046291  | +0.0545384 | 743.4046291         |            |
|                     | 2216.1022461 |            | 2216.1022461 | 19 | D   | 5  | 646.35186524 |            | 646.35186524        |            |
| +0.1567593          | 1158.0889682 |            | 2315.17066   | 20 | V   | 4  | 531.32492221 | +0.1547531 | 531.32492221        |            |
|                     | 2402.2026884 |            | 2402.2026884 | 21 | S   | 3  | 432.25650829 | +0.1740337 | 432.25650829        |            |
| -0.2306326          | 1258.1470144 |            | 2515.2867524 | 22 | I   | 2  | 345.22447988 | +0.0515821 | 345.22447988        |            |
|                     | 2572.3082161 |            | 2572.3082161 | 23 | G   | 1  | 232.1404159  |            | 232.1404159         |            |
|                     |              |            |              | 24 | R   | 0  | 175.11895218 |            | 175.11895218        |            |

general information

|                       |             |
|-----------------------|-------------|
| Annotation:           | 13 of 24    |
| AminoAcids Coverage:  | 54%         |
| Intensity Coverage:   | 66%         |
| Peak Coverage:        | 21%         |
| Protein Localisation: | 123 ... 146 |



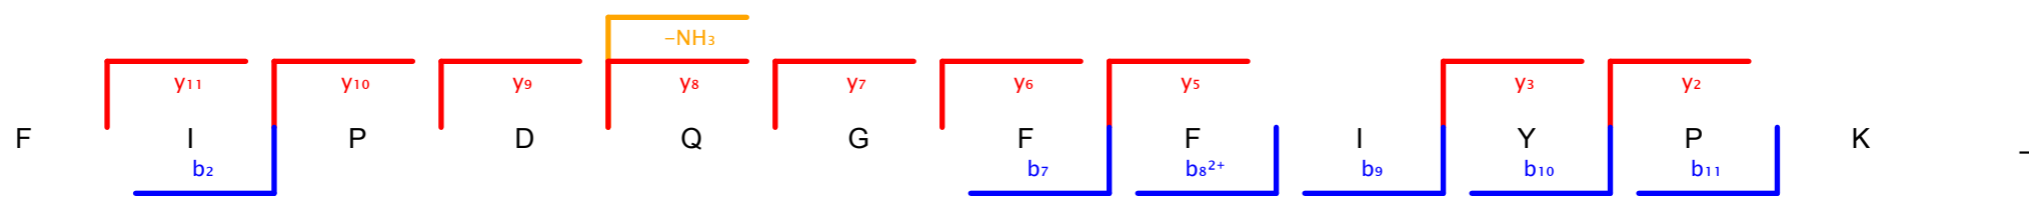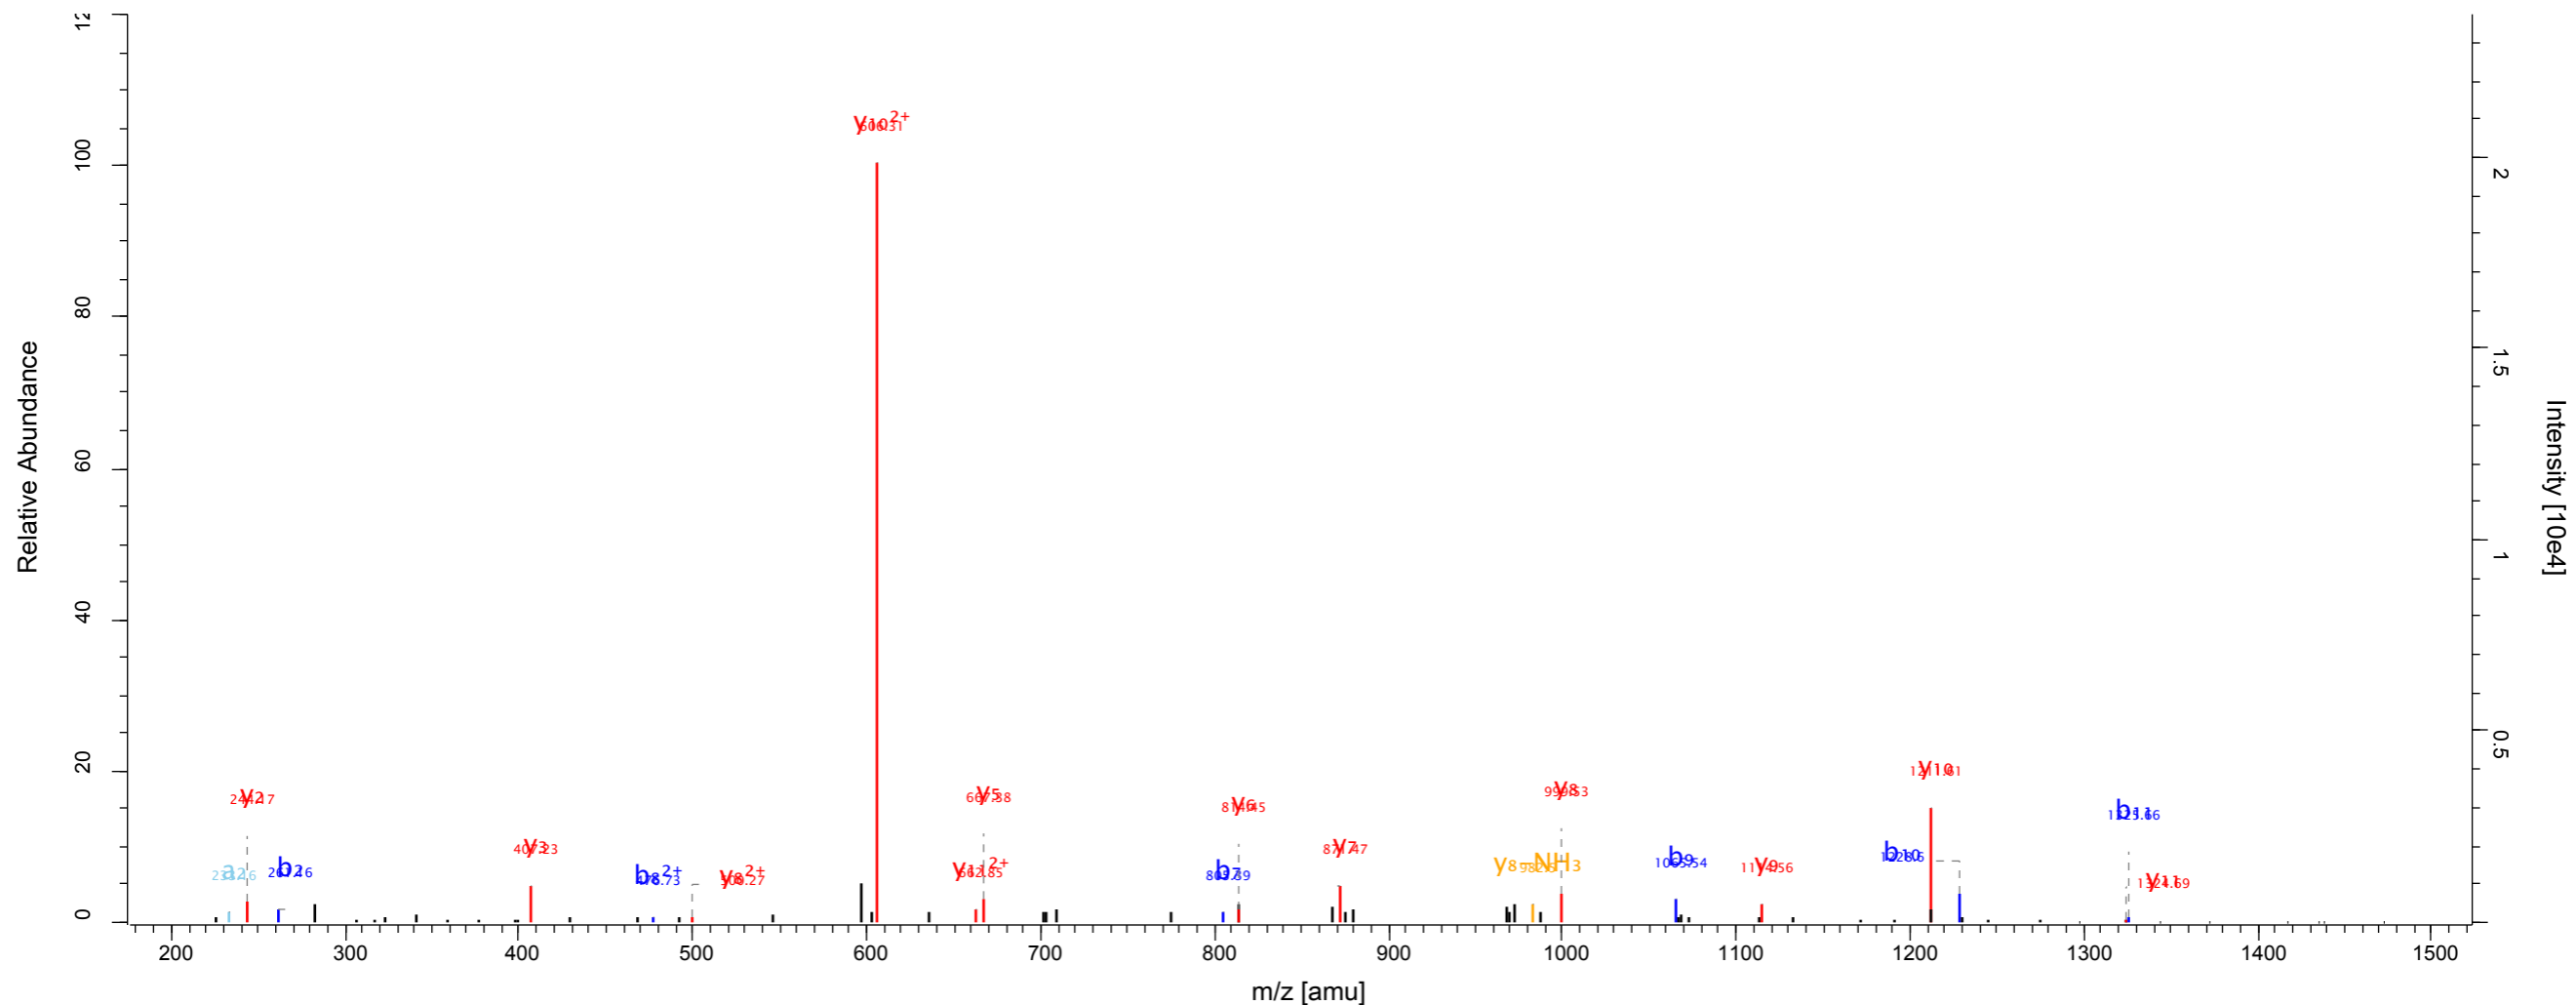

precursor information

|                   |                 |
|-------------------|-----------------|
| Mass:             | 1470.75558      |
| m/z:              | 736.38507       |
| Charge:           | 2+              |
| Retention time:   | 107.72477722168 |
| Score:            | 145.9146        |
| Mass Error (ppm): | 0.57318         |
| PEP:              | 6.3058E-05      |
| Precursor Type:   | ISO             |

general information

|                       |           |
|-----------------------|-----------|
| Annotation:           | 10 of 12  |
| AminoAcids Coverage:  | 82 %      |
| Intensity Coverage:   | 77 %      |
| Peak Coverage:        | 70 %      |
| Protein Localisation: | 85 ... 96 |

| a ion     |            | b <sup>2+</sup> ion |            | b ion      |            |    |     |    | y ion      |            | y <sup>2+</sup> ion |            |
|-----------|------------|---------------------|------------|------------|------------|----|-----|----|------------|------------|---------------------|------------|
| Δ dalton  | mass       | Δ dalton            | mass       | Δ dalton   | mass       |    | seq |    | Δ dalton   | mass       | Δ dalton            | mass       |
|           | 120.080776 |                     | 148.07569  |            | 148.07569  | 1  | F   | 11 |            |            |                     |            |
| -0.001586 | 233.16484  |                     | 261.159754 | -0.0069834 | 261.159754 | 2  | I   | 10 | 1324.6936  | -0.1734589 | 662.850438          | +0.0124155 |
|           | 330.217604 |                     | 358.212518 |            | 358.212518 | 3  | P   | 9  | 1211.60954 | +0.0534274 | 606.308406          | +0.1314739 |
|           | 445.244547 |                     | 473.239461 |            | 473.239461 | 4  | D   | 8  | 1114.55677 | +0.1481834 | 1114.55677          |            |
|           | 573.303124 |                     | 601.298039 |            | 601.298039 | 5  | Q   | 7  | 999.52983  | +0.0073408 | 500.268553          | -0.0017684 |
|           | 630.324588 |                     | 658.319502 |            | 658.319502 | 6  | G   | 6  | 871.471252 | +0.0622562 | 871.471252          |            |
|           | 777.393002 |                     | 805.387916 | +0.199547  | 805.387916 | 7  | F   | 5  | 814.449788 | -0.0486043 | 814.449788          |            |
|           | 924.461416 | +0.3941121          | 476.731803 |            | 952.45633  | 8  | F   | 4  | 667.381374 | +0.1340674 | 667.381374          |            |
|           | 1037.54548 |                     | 1065.54039 | -0.1351209 | 1065.54039 | 9  | I   | 3  | 520.312961 |            | 520.312961          |            |
|           | 1200.60881 |                     | 1228.60372 | -0.0445187 | 1228.60372 | 10 | Y   | 2  | 407.228897 | +0.0363012 | 407.228897          |            |
|           | 1297.66157 |                     | 1325.65649 | +0.0533522 | 1325.65649 | 11 | P   | 1  | 244.165568 | +0.1530965 | 244.165568          |            |
|           |            |                     |            |            |            | 12 | K   | 0  | 147.112804 |            | 147.112804          |            |

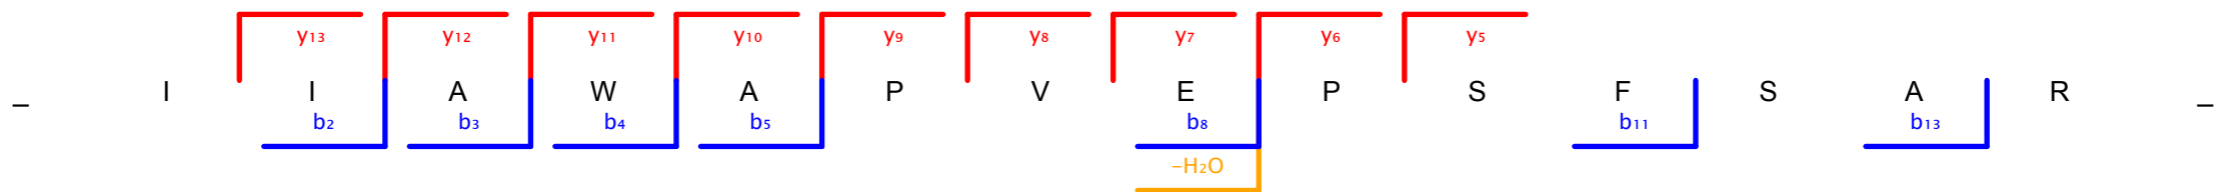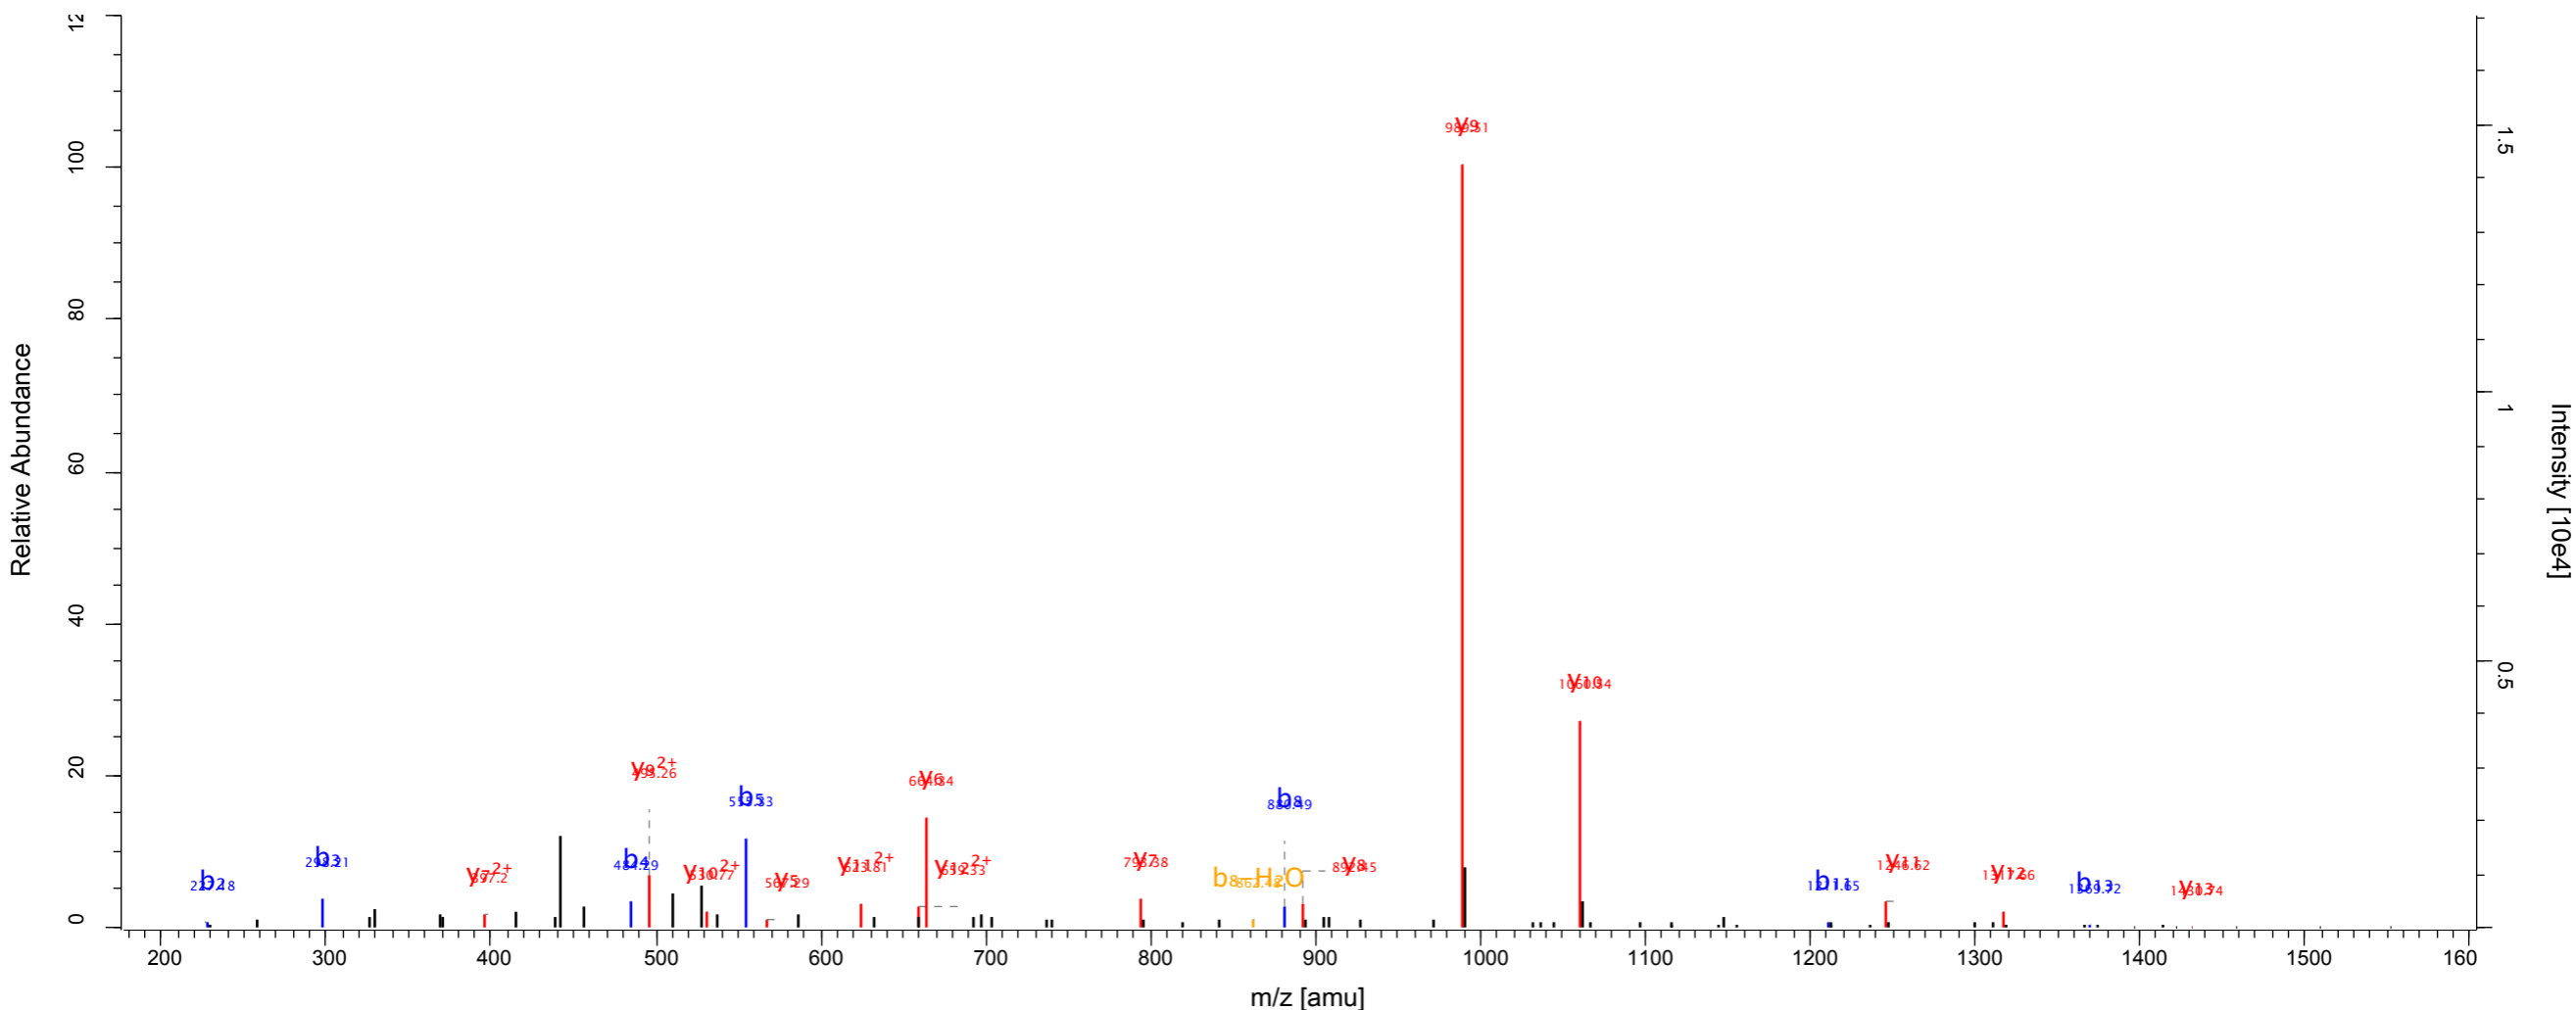

precursor information

|                   |                  |
|-------------------|------------------|
| Mass:             | 1542.81062       |
| m/z:              | 772.41700        |
| Charge:           | 2+               |
| Potentialtime:    | 07.0426050682504 |
| Score:            | 128.6744         |
| Mass Error [ppm]: | 0.1111           |
| PEP:              | 6.6846E-08       |
| Precursor Type:   | MULTI            |

| b ion      |                |    |     |    | y ion          |            | y <sup>2+</sup> ion |            |
|------------|----------------|----|-----|----|----------------|------------|---------------------|------------|
| Δ dalton   | mass           |    | seq |    | Δ dalton       | mass       | Δ dalton            | mass       |
|            | 114.091340447  | 1  | I   | 13 |                |            |                     |            |
| +0.0786697 | 227.175404427  | 2  | I   | 12 | 1430.742675931 | +0.0828856 | 1430.742675931      |            |
| +0.0555787 | 298.212518215  | 3  | A   | 11 | 1317.65861195  | +0.0507386 | 659.332944208       | -0.0140355 |
| -0.1355812 | 484.291831169  | 4  | W   | 10 | 1246.621498162 | +0.0393905 | 623.814387315       | -0.0009718 |
| +0.0472147 | 555.328944956  | 5  | A   | 9  | 1060.542185209 | +0.0463158 | 530.774730838       | +0.2137335 |
|            | 652.381708808  | 6  | P   | 8  | 989.505071421  | +0.0590765 | 495.256173944       | +0.075369  |
|            | 751.450122725  | 7  | V   | 7  | 892.452307569  | +0.1482784 | 892.452307569       |            |
| -0.0279331 | 880.492715821  | 8  | E   | 6  | 793.383893653  | +0.2129081 | 397.19558506        | -0.3757608 |
|            | 977.545479673  | 9  | P   | 5  | 664.341300557  | +0.2139363 | 664.341300557       |            |
|            | 1064.577508083 | 10 | S   | 4  | 567.288536705  | +0.0851205 | 567.288536705       |            |
| -0.2349113 | 1211.645921999 | 11 | F   | 3  | 480.256508295  |            | 480.256508295       |            |
|            | 1298.677950409 | 12 | S   | 2  | 333.188094379  |            | 333.188094379       |            |
| -0.098487  | 1369.715064197 | 13 | A   | 1  | 246.156065969  |            | 246.156065969       |            |
|            |                | 14 | R   | 0  | 175.118952181  |            | 175.118952181       |            |

general information

|                       |             |
|-----------------------|-------------|
| Annotation:           | 11 of 14    |
| AminoAcids Coverage:  | 70 %        |
| Intensity Coverage:   | 71 %        |
| Peak Coverage:        | 78 %        |
| Protein Localisation: | 174 ... 187 |

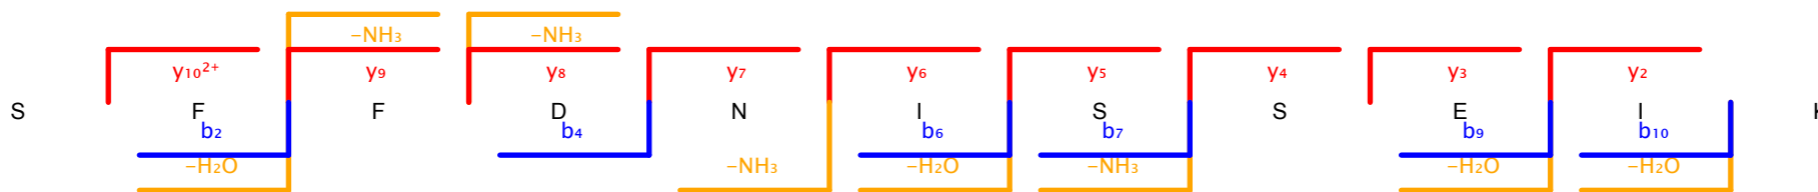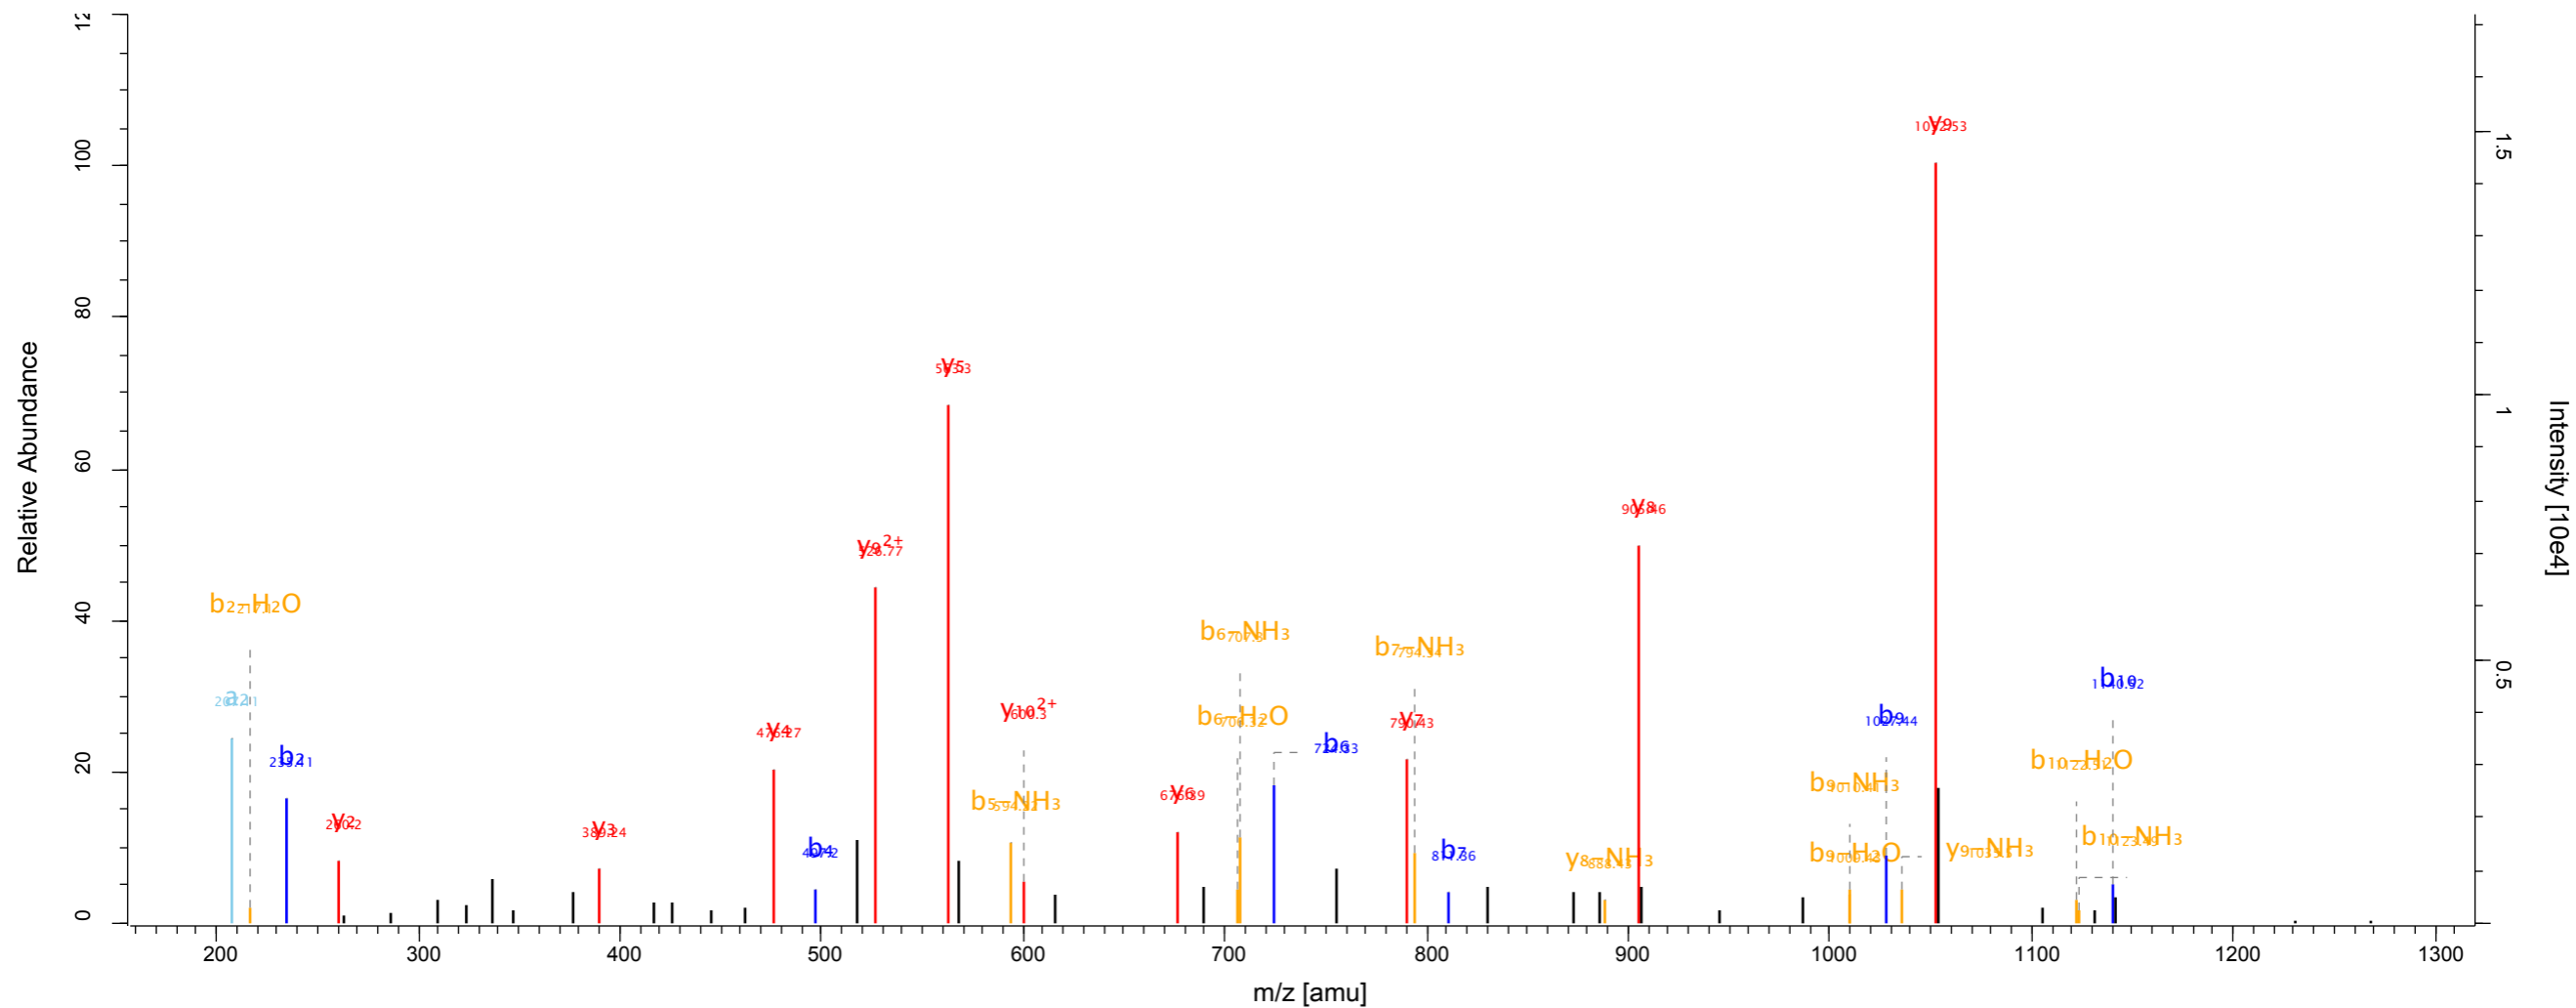

precursor information

|                   |                  |
|-------------------|------------------|
| Mass:             | 1285.61002       |
| m/z:              | 643.81670        |
| Charge:           | 2+               |
| Retention time:   | 103.104065200061 |
| Score:            | 201.8442         |
| Mass Error (ppm): | -0.0074127       |
| PEP:              | 0.336E-17        |
| Precursor Type:   | MULTI            |

general information

|                       |             |
|-----------------------|-------------|
| Annotation:           | 9 of 11     |
| AminoAcids Coverage:  | 82 %        |
| Intensity Coverage:   | 81 %        |
| Peak Coverage:        | 50 %        |
| Protein Localisation: | 317 ... 327 |

| a ion      |              | b ion      |              |    |     |    | y ion        |            | y <sup>2+</sup> ion |            |
|------------|--------------|------------|--------------|----|-----|----|--------------|------------|---------------------|------------|
| Δ dalton   | mass         | Δ dalton   | mass         |    | seq |    | Δ dalton     | mass       | Δ dalton            | mass       |
|            | 60.044390254 |            | 88.039304876 | 1  | S   | 10 |              |            |                     |            |
| +0.0868113 | 207.11280417 | -0.0092996 | 235.10771879 | 2  | F   | 9  | 1199.5942804 |            | 600.30077841        | +0.0433988 |
|            | 354.18121809 |            | 382.17613271 | 3  | F   | 8  | 1052.5258664 | -0.0182981 | 526.76657145        | +0.1390072 |
|            | 469.20816112 | -0.0028194 | 497.20307574 | 4  | D   | 7  | 905.45745253 | +0.078192  | 905.45745253        |            |
|            | 583.25108857 |            | 611.24600319 | 5  | N   | 6  | 790.43050949 | +0.1413289 | 790.43050949        |            |
|            | 696.33515255 | +0.0883899 | 724.33006717 | 6  | I   | 5  | 676.38758205 | -0.0277798 | 676.38758205        |            |
|            | 783.36718096 | +0.0860856 | 811.36209558 | 7  | S   | 4  | 563.30351807 | +0.099375  | 563.30351807        |            |
|            | 870.39920937 |            | 898.39412399 | 8  | S   | 3  | 476.27148966 | +0.0561471 | 476.27148966        |            |
|            | 999.44180246 | +0.0386247 | 1027.4367171 | 9  | E   | 2  | 389.23946125 | +0.1147868 | 389.23946125        |            |
|            | 1112.5258664 | -0.1658006 | 1140.5207811 | 10 | I   | 1  | 260.19686815 | +0.0278023 | 260.19686815        |            |
|            |              |            |              | 11 | K   | 0  | 147.11280417 |            | 147.11280417        |            |

Scan number 9339 Raw file 20080721\_Orbi1\_SaZa\_SA\_ADH\_Matrigel\_Exp\_1\_Susp\_InGel\_15  
 Method ITMS; CID Genenames WRAP73;WDR8

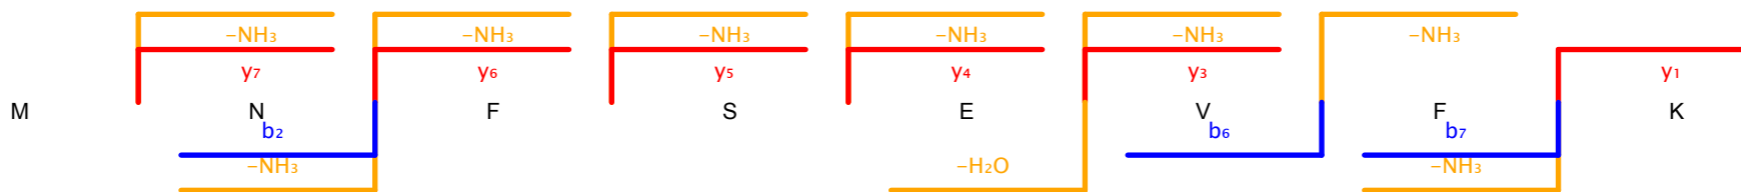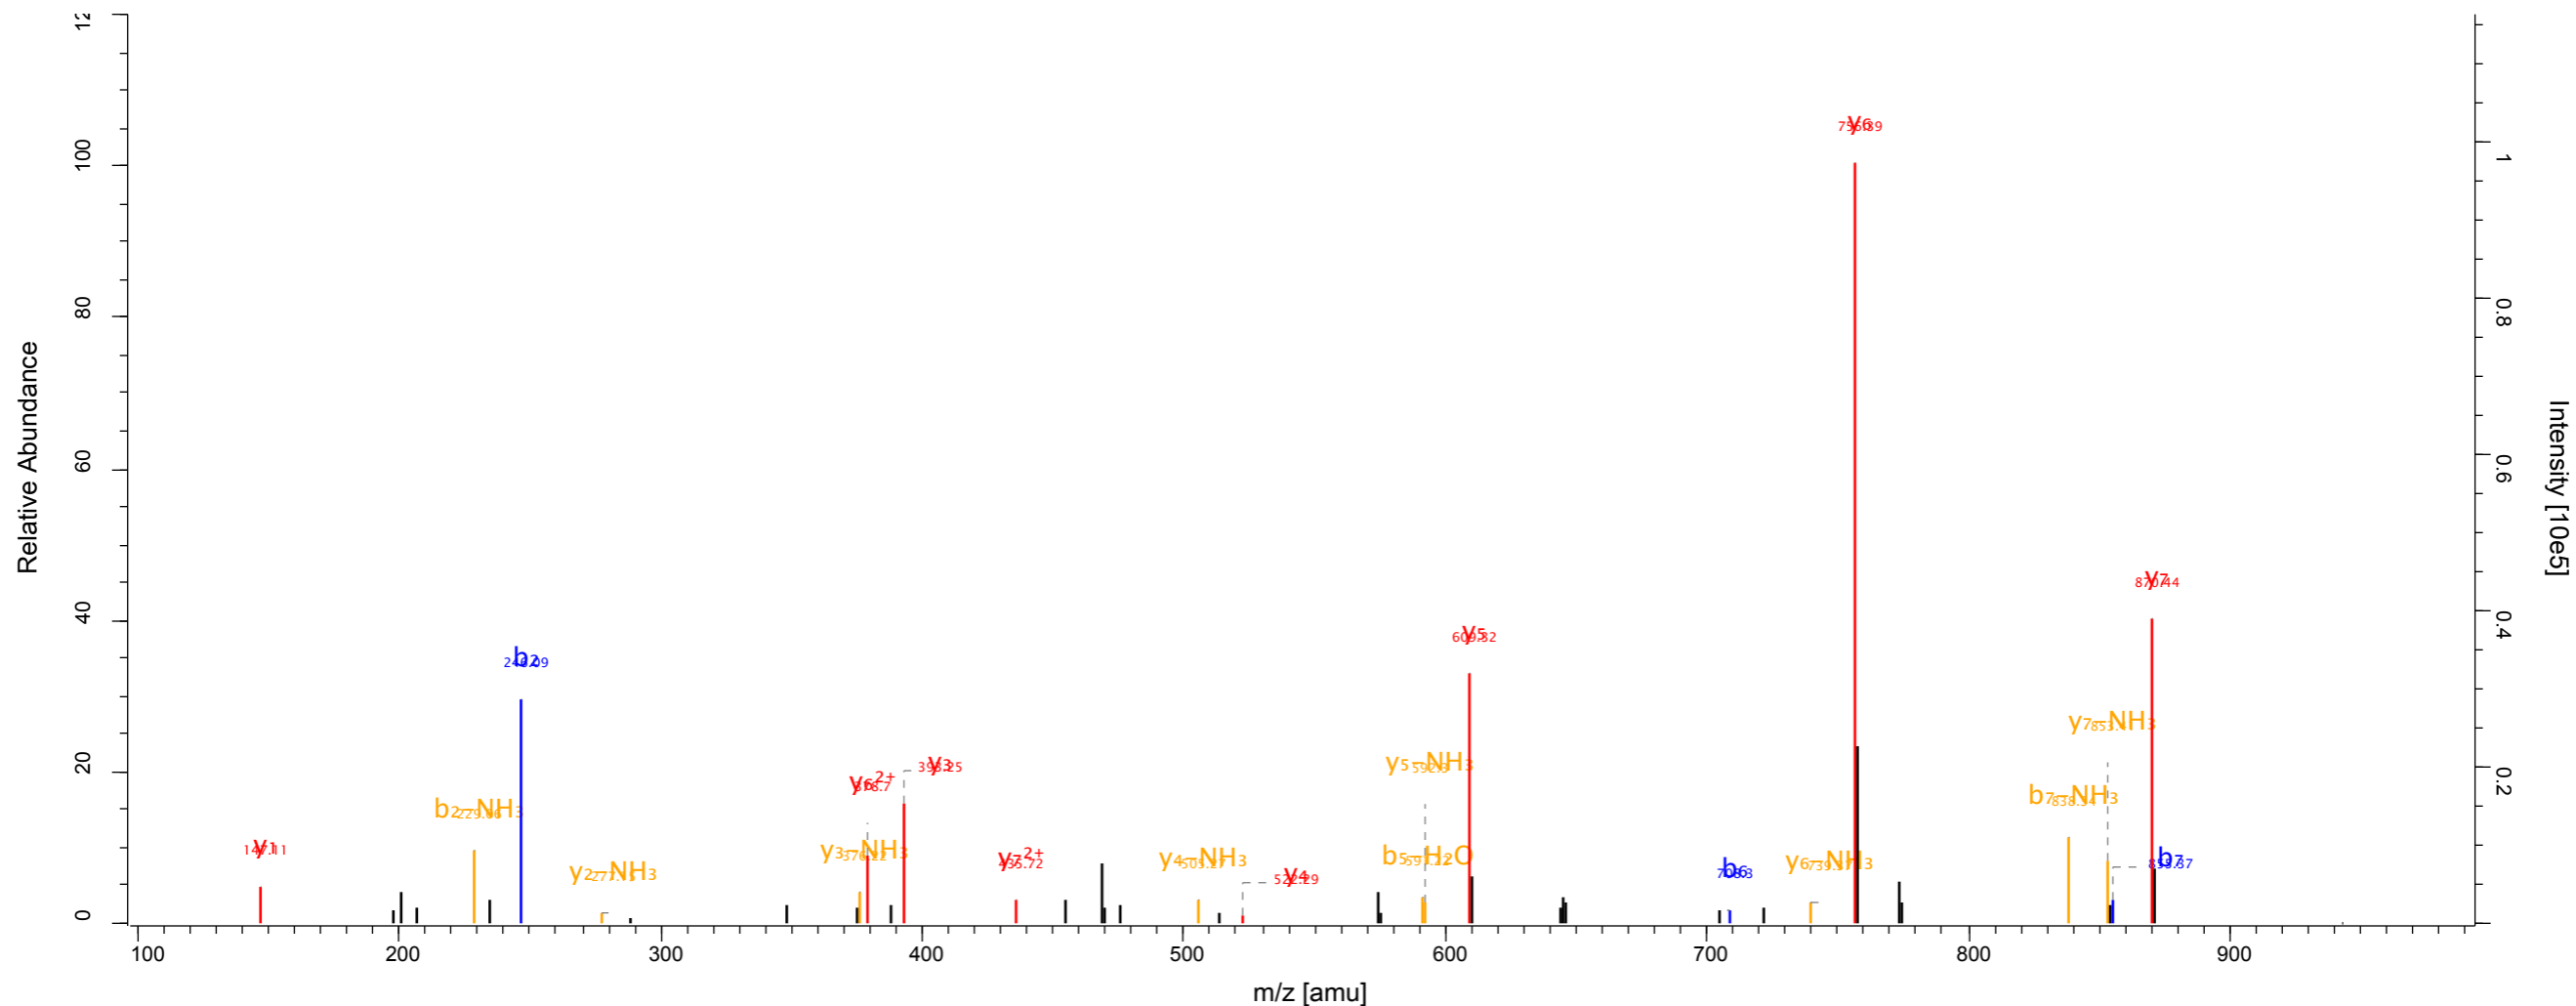

precursor information

|                       |                 |
|-----------------------|-----------------|
| Mass:                 | 1000.46967      |
| m/z:                  | 501.24211       |
| Charge:               | 2+              |
| Retention time:       | 70.178825378418 |
| Score:                | 164.5321        |
| Mass Error [ppm]:     | 0.87106         |
| gene ID:              | 0.00020551      |
| Annotation:           | 7 of 8          |
| AminoAcids Coverage:  | 88 %            |
| Intensity Coverage:   | 74 %            |
| Peak Coverage:        | 43 %            |
| Protein Localisation: | 1 ... 8         |

| b ion      |               |   |     |   | y ion         |            | y <sup>2+</sup> ion |            |
|------------|---------------|---|-----|---|---------------|------------|---------------------|------------|
| Δ dalton   | mass          |   | seq |   | Δ dalton      | mass       | Δ dalton            | mass       |
|            | 132.047761073 | 1 | M   | 7 |               |            |                     |            |
| +0.099375  | 246.09068852  | 2 | N   | 6 | 870.435594872 | +0.0614144 | 435.72143567        | +0.1679381 |
|            | 393.159102436 | 3 | F   | 5 | 756.392667425 | +0.1012901 | 378.699971946       | +0.0503943 |
|            | 480.191130846 | 4 | S   | 4 | 609.324253509 | +0.058498  | 609.324253509       |            |
|            | 609.233723942 | 5 | E   | 3 | 522.292225099 | -0.0725596 | 522.292225099       |            |
| +0.1719832 | 708.302137859 | 6 | V   | 2 | 393.249632003 | +0.0563067 | 393.249632003       |            |
| +0.0976489 | 855.370551775 | 7 | F   | 1 | 294.181218087 |            | 294.181218087       |            |
|            |               | 8 | K   | 0 | 147.112804171 | +0.0309794 | 147.112804171       |            |

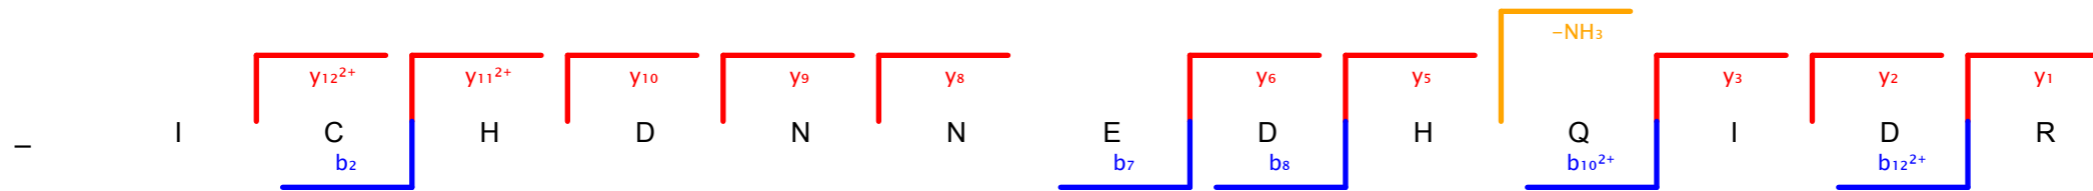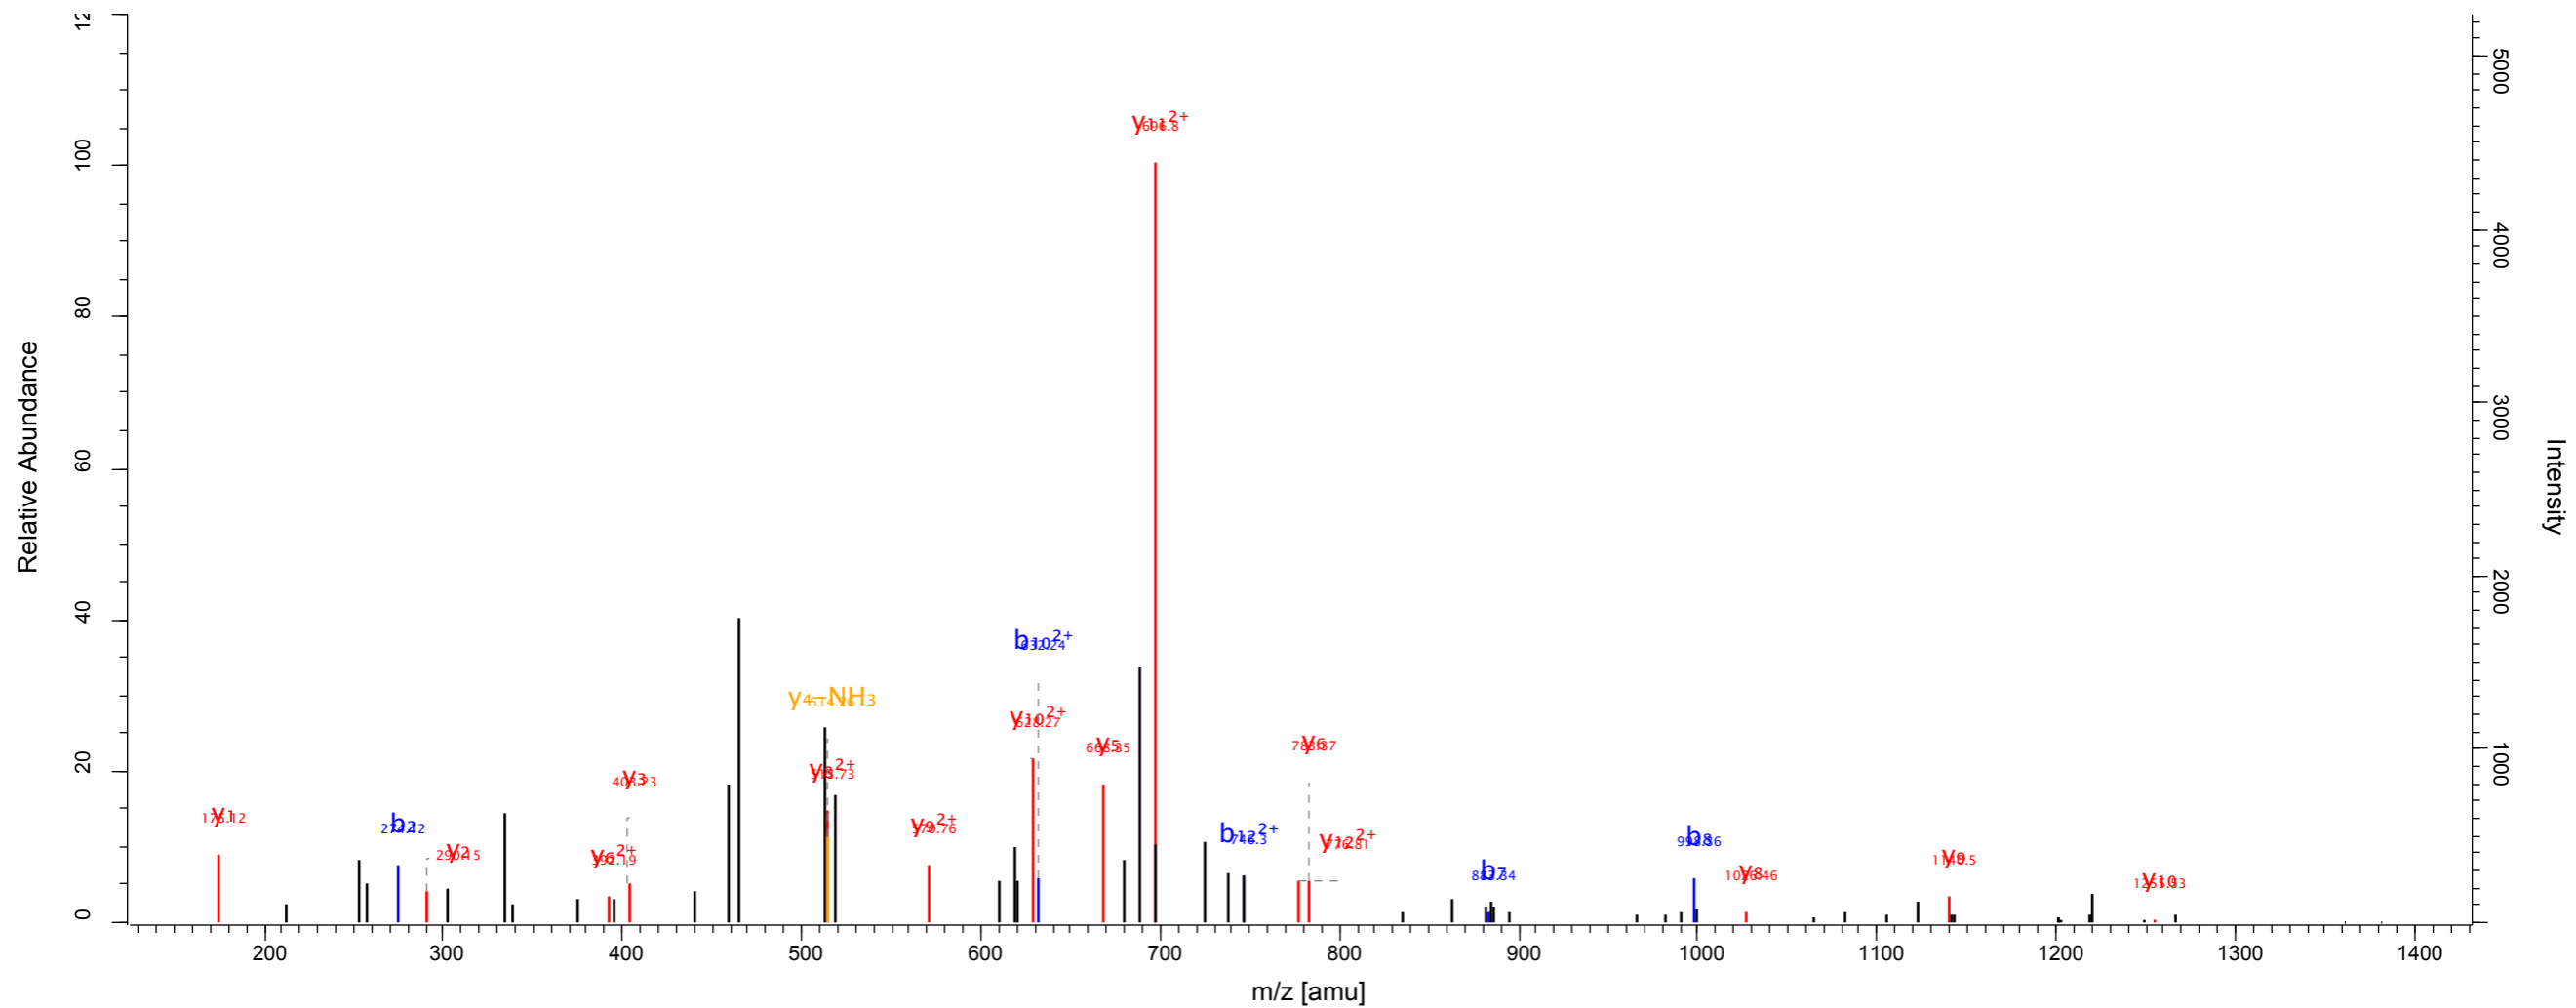

precursor information

|                   |                  |
|-------------------|------------------|
| Mass:             | 1664.69611       |
| m/z:              | 555.90598        |
| Charge:           | 2+               |
| Retention time:   | 28.4546775817871 |
| Score:            | 105.2036         |
| Mass Error (ppm): | -0.013321        |
| PEP:              | 0.00020273       |
| Precursor Type:   | MULTI            |

general information

|                       |           |
|-----------------------|-----------|
| Annotation:           | 12 of 12  |
| AminoAcids Coverage:  | 92 %      |
| Intensity Coverage:   | 46 %      |
| Peak Coverage:        | 30 %      |
| Protein Localisation: | 42 ... 54 |

| b <sup>2+</sup> ion |              | b ion      |              |    |     |    | y ion        |            | y <sup>2+</sup> ion |            |
|---------------------|--------------|------------|--------------|----|-----|----|--------------|------------|---------------------|------------|
| Δ dalton            | mass         | Δ dalton   | mass         |    | seq |    | Δ dalton     | mass       | Δ dalton            | mass       |
|                     | 114.09134045 |            | 114.09134045 | 1  | I   | 12 |              |            |                     |            |
|                     | 274.12198865 | +0.177755  | 274.12198865 | 2  | C   | 11 | 1552.6193427 |            | 776.81330958        | +0.3232871 |
|                     | 411.18090051 |            | 411.18090051 | 3  | H   | 10 | 1392.5886945 |            | 696.79798548        | +0.3011356 |
|                     | 526.20784354 |            | 526.20784354 | 4  | D   | 9  | 1255.5297826 | +0.0587184 | 628.26852954        | +0.2304329 |
|                     | 640.25077099 |            | 640.25077099 | 5  | N   | 8  | 1140.5028396 | +0.1772141 | 570.75505803        | +0.0847247 |
|                     | 754.29369844 |            | 754.29369844 | 6  | N   | 7  | 1026.4599121 | -0.0387696 | 513.7335943         | -0.0207037 |
|                     | 883.33629153 | -0.0276367 | 883.33629153 | 7  | E   | 6  | 912.4169847  |            | 912.4169847         |            |
|                     | 998.36323457 | +0.1245584 | 998.36323457 | 8  | D   | 5  | 783.3743916  | +0.0529766 | 392.19083403        | +0.1310043 |
|                     | 1135.4221464 |            | 1135.4221464 | 9  | H   | 4  | 668.34744857 | +0.0740602 | 668.34744857        |            |
| +0.2810852          | 632.2440002  |            | 1263.4807239 | 10 | Q   | 3  | 531.2885367  |            | 531.2885367         |            |
|                     | 1376.5647879 |            | 1376.5647879 | 11 | I   | 2  | 403.22995919 | +0.0337737 | 403.22995919        |            |
| +0.1995197          | 746.29950371 |            | 1491.591731  | 12 | D   | 1  | 290.14589521 | +0.0327547 | 290.14589521        |            |
|                     |              |            |              | 13 | R   | 0  | 175.11895218 | +0.0491081 | 175.11895218        |            |

Scan number 16648 Raw file 20080812\_Orbi1\_SaZa\_SA\_ADH\_Matrigel\_Exp\_1\_30h\_InGel\_01  
 Method ITMS; CID Genenames C7orf41

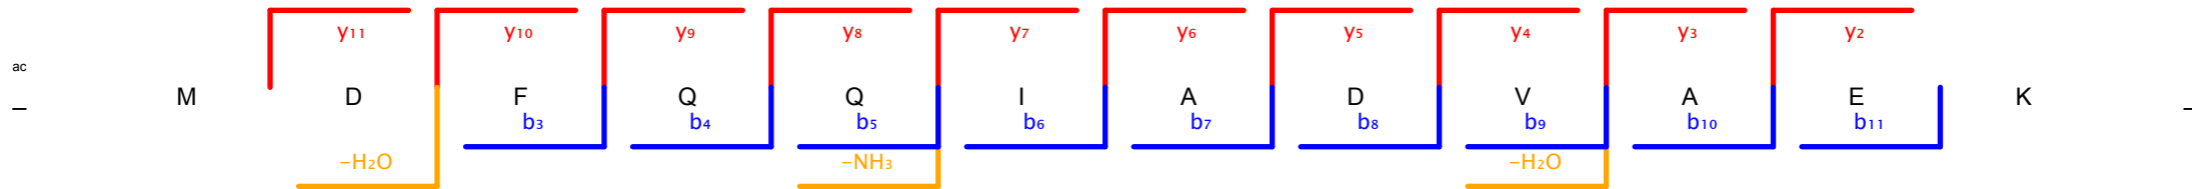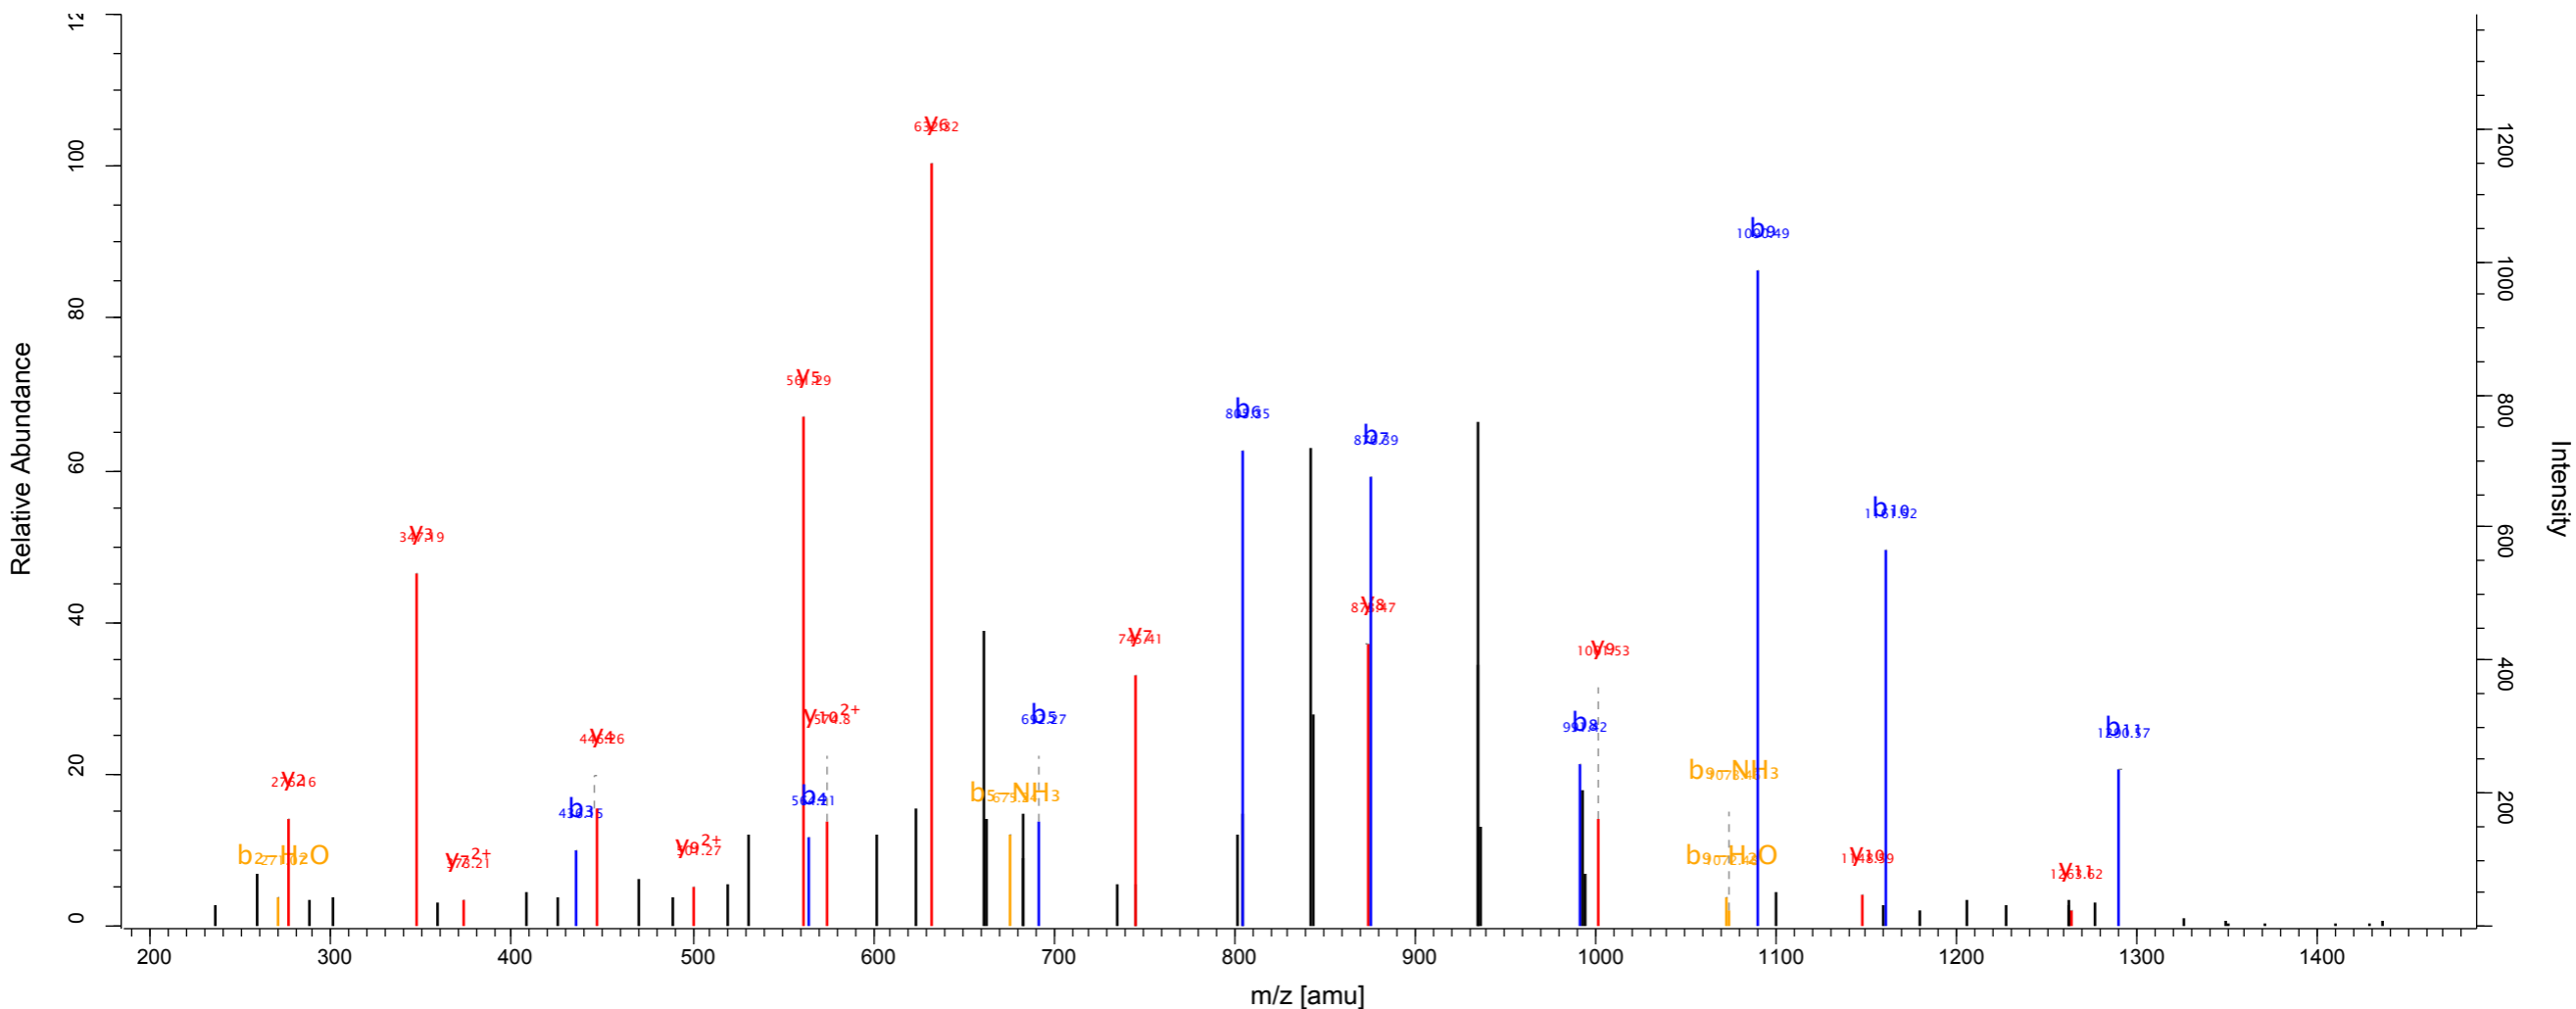

precursor information

|                   |                  |
|-------------------|------------------|
| Mass:             | 1425.6661        |
| m/z:              | 718.81032        |
| Charge:           | 2+               |
| Retention time:   | 118.112632751465 |
| Score:            | 150.6020         |
| Mass Error [ppm]: | 0.53880          |
| PEP:              | 2.6814E-05       |
| Precursor Type:   | MULTI            |

general information

|                       |          |
|-----------------------|----------|
| Annotation:           | 10 of 12 |
| AminoAcids Coverage:  | 82 %     |
| Intensity Coverage:   | 61 %     |
| Peak Coverage:        | 38 %     |
| Protein Localisation: | 1 ... 12 |

| b ion      |                |    |     |    | y ion          |            | y <sup>2+</sup> ion |            |
|------------|----------------|----|-----|----|----------------|------------|---------------------|------------|
| Δ dalton   | mass           |    | seq |    | Δ dalton       | mass       | Δ dalton            | mass       |
|            | 174.058325759  | 1  | M   | 11 |                |            |                     |            |
|            | 289.085268791  | 2  | D   | 10 | 1263.621557742 | -0.0296388 | 1263.621557742      |            |
| +0.0399818 | 436.153682707  | 3  | F   | 9  | 1148.59461471  | -0.0462749 | 574.800945588       | +0.2971989 |
| -0.0215254 | 564.212260219  | 4  | Q   | 8  | 1001.526200794 | +0.178328  | 501.26673863        | +0.0414279 |
| +0.0110226 | 692.27083773   | 5  | Q   | 7  | 873.467623282  | +0.1498694 | 873.467623282       |            |
| +0.1004816 | 805.35490171   | 6  | I   | 6  | 745.409045771  | +0.1702389 | 373.208161119       | +0.1616509 |
| -0.1262074 | 876.392015498  | 7  | A   | 5  | 632.324981791  | +0.1256408 | 632.324981791       |            |
| +0.0435048 | 991.41895853   | 8  | D   | 4  | 561.287868003  | +0.0441022 | 561.287868003       |            |
| -0.1151801 | 1090.487372446 | 9  | V   | 3  | 446.260924971  | +0.1531375 | 446.260924971       |            |
| -0.1270253 | 1161.524486234 | 10 | A   | 2  | 347.192511055  | +0.0490051 | 347.192511055       |            |
| -0.1646135 | 1290.56707933  | 11 | E   | 1  | 276.155397267  | +0.0841047 | 276.155397267       |            |
|            |                | 12 | K   | 0  | 147.112804171  |            | 147.112804171       |            |

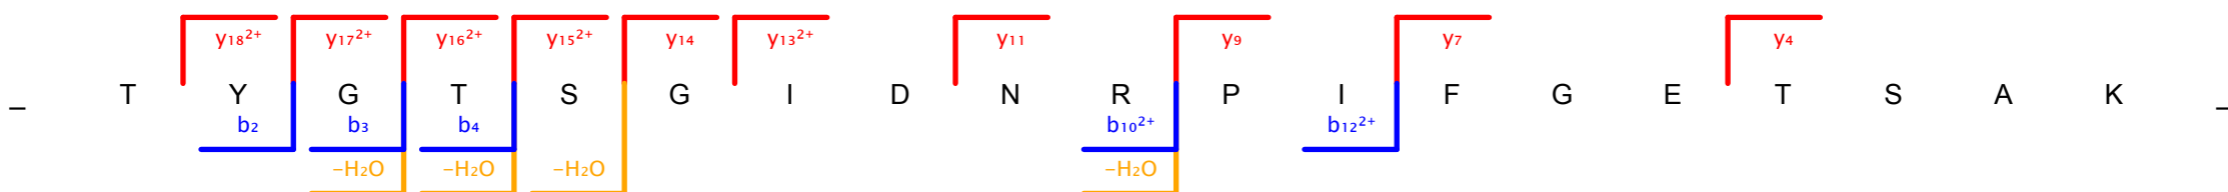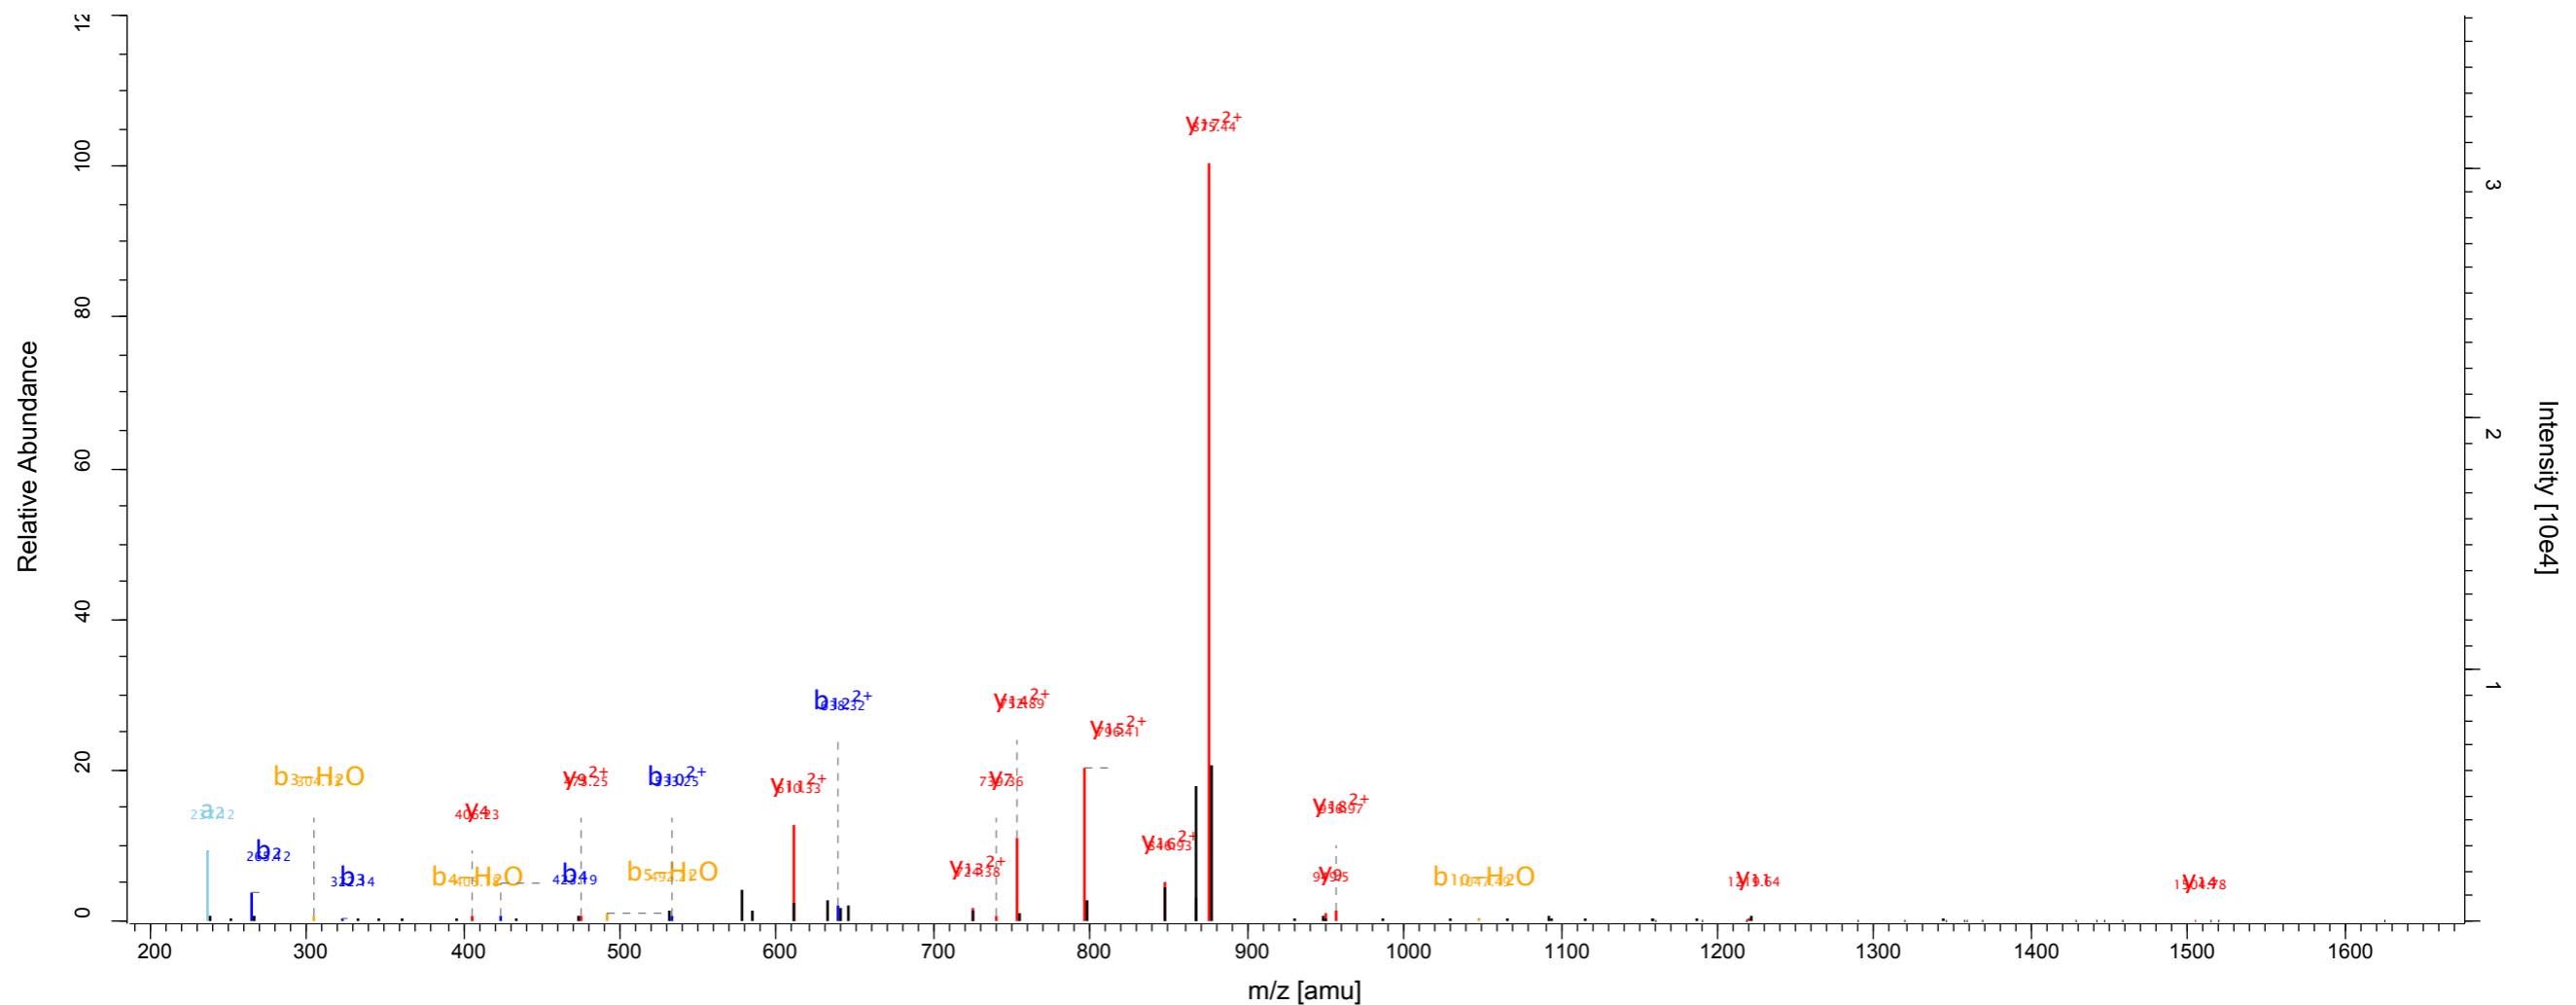

precursor information

|                   |                  |
|-------------------|------------------|
| Mass:             | 2012.07007       |
| m/z:              | 672.0002         |
| Charge:           | 2+               |
| RetentionTime:    | 60.7182685202724 |
| Score:            | 107.7254         |
| Mass Error (ppm): | -0.6201          |
| DEP:              | 2.10705e-07      |
| Precursor Type:   | MULTI            |

general information

|                       |          |
|-----------------------|----------|
| Annotation:           | 12 of 10 |
| AminoAcids Coverage:  | 63%      |
| Intensity Coverage:   | 60%      |
| Peak Coverage:        | 20%      |
| Protein Localisation: | 8 ... 26 |

| a ion      |            | b <sup>2+</sup> ion |            | b ion      |            |    |     |    | y ion      |            | y <sup>2+</sup> ion |            |
|------------|------------|---------------------|------------|------------|------------|----|-----|----|------------|------------|---------------------|------------|
| Δ dalton   | mass       | Δ dalton            | mass       | Δ dalton   | mass       |    | seq |    | Δ dalton   | mass       | Δ dalton            | mass       |
|            | 74.0600403 |                     | 102.054955 |            | 102.054955 | 1  | T   | 18 |            |            |                     |            |
| +0.1033462 | 237.123369 |                     | 265.118283 | +0.0723903 | 265.118283 | 2  | Y   | 17 | 1912.93993 |            | 956.973604          | +0.4790936 |
|            | 294.144833 |                     | 322.139747 | +0.2201161 | 322.139747 | 3  | G   | 16 | 1749.8766  |            | 875.44194           | +0.3200841 |
|            | 395.192511 |                     | 423.187426 | +0.0987682 | 423.187426 | 4  | T   | 15 | 1692.85514 |            | 846.931208          | +0.1716363 |
|            | 482.224539 |                     | 510.219454 |            | 510.219454 | 5  | S   | 14 | 1591.80746 |            | 796.407369          | +0.2635297 |
|            | 539.246003 |                     | 567.240918 |            | 567.240918 | 6  | G   | 13 | 1504.77543 | +0.3103828 | 752.891355          | +0.276187  |
|            | 652.330067 |                     | 680.324982 |            | 680.324982 | 7  | I   | 12 | 1447.75397 |            | 724.380623          | +0.14489   |
|            | 767.35701  |                     | 795.351925 |            | 795.351925 | 8  | D   | 11 | 1334.6699  |            | 1334.6699           |            |
|            | 881.399938 |                     | 909.394852 |            | 909.394852 | 9  | N   | 10 | 1219.64296 | +0.0745674 | 610.325119          | +0.3010405 |
|            | 1037.50105 | +0.2571081          | 533.25162  |            | 1065.49596 | 10 | R   | 9  | 1105.60003 |            | 1105.60003          |            |
|            | 1134.55381 |                     | 1162.54873 |            | 1162.54873 | 11 | P   | 8  | 949.498923 | +0.1289452 | 475.2531            | +0.1410651 |
|            | 1247.63788 | +0.412266           | 638.320034 |            | 1275.63279 | 12 | I   | 7  | 852.44616  |            | 852.44616           |            |
|            | 1394.70629 |                     | 1422.70121 |            | 1422.70121 | 13 | F   | 6  | 739.362096 | +0.105922  | 739.362096          |            |
|            | 1451.72775 |                     | 1479.72267 |            | 1479.72267 | 14 | G   | 5  | 592.293682 |            | 592.293682          |            |
|            | 1580.77035 |                     | 1608.76526 |            | 1608.76526 | 15 | E   | 4  | 535.272218 |            | 535.272218          |            |
|            | 1681.81803 |                     | 1709.81294 |            | 1709.81294 | 16 | T   | 3  | 406.229625 | +0.0902604 | 406.229625          |            |
|            | 1768.85005 |                     | 1796.84497 |            | 1796.84497 | 17 | S   | 2  | 305.181946 |            | 305.181946          |            |
|            | 1839.88717 |                     | 1867.88208 |            | 1867.88208 | 18 | A   | 1  | 218.149918 |            | 218.149918          |            |
|            |            |                     |            |            |            | 19 | K   | 0  | 147.112804 |            | 147.112804          |            |

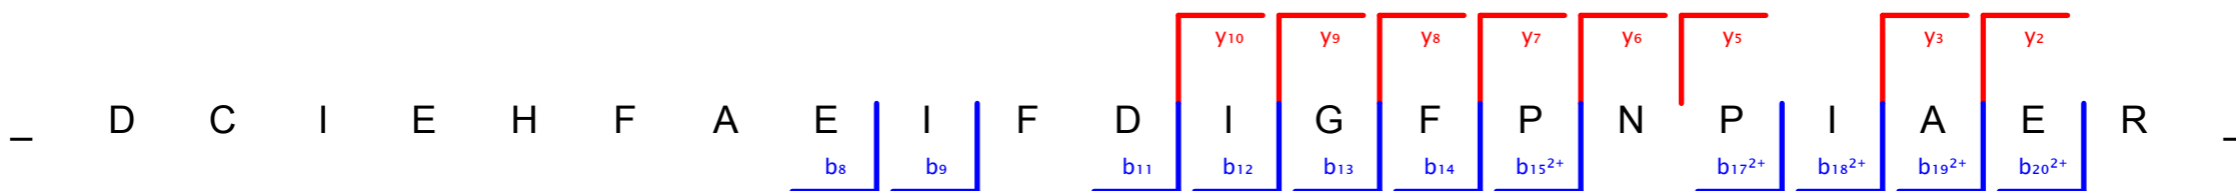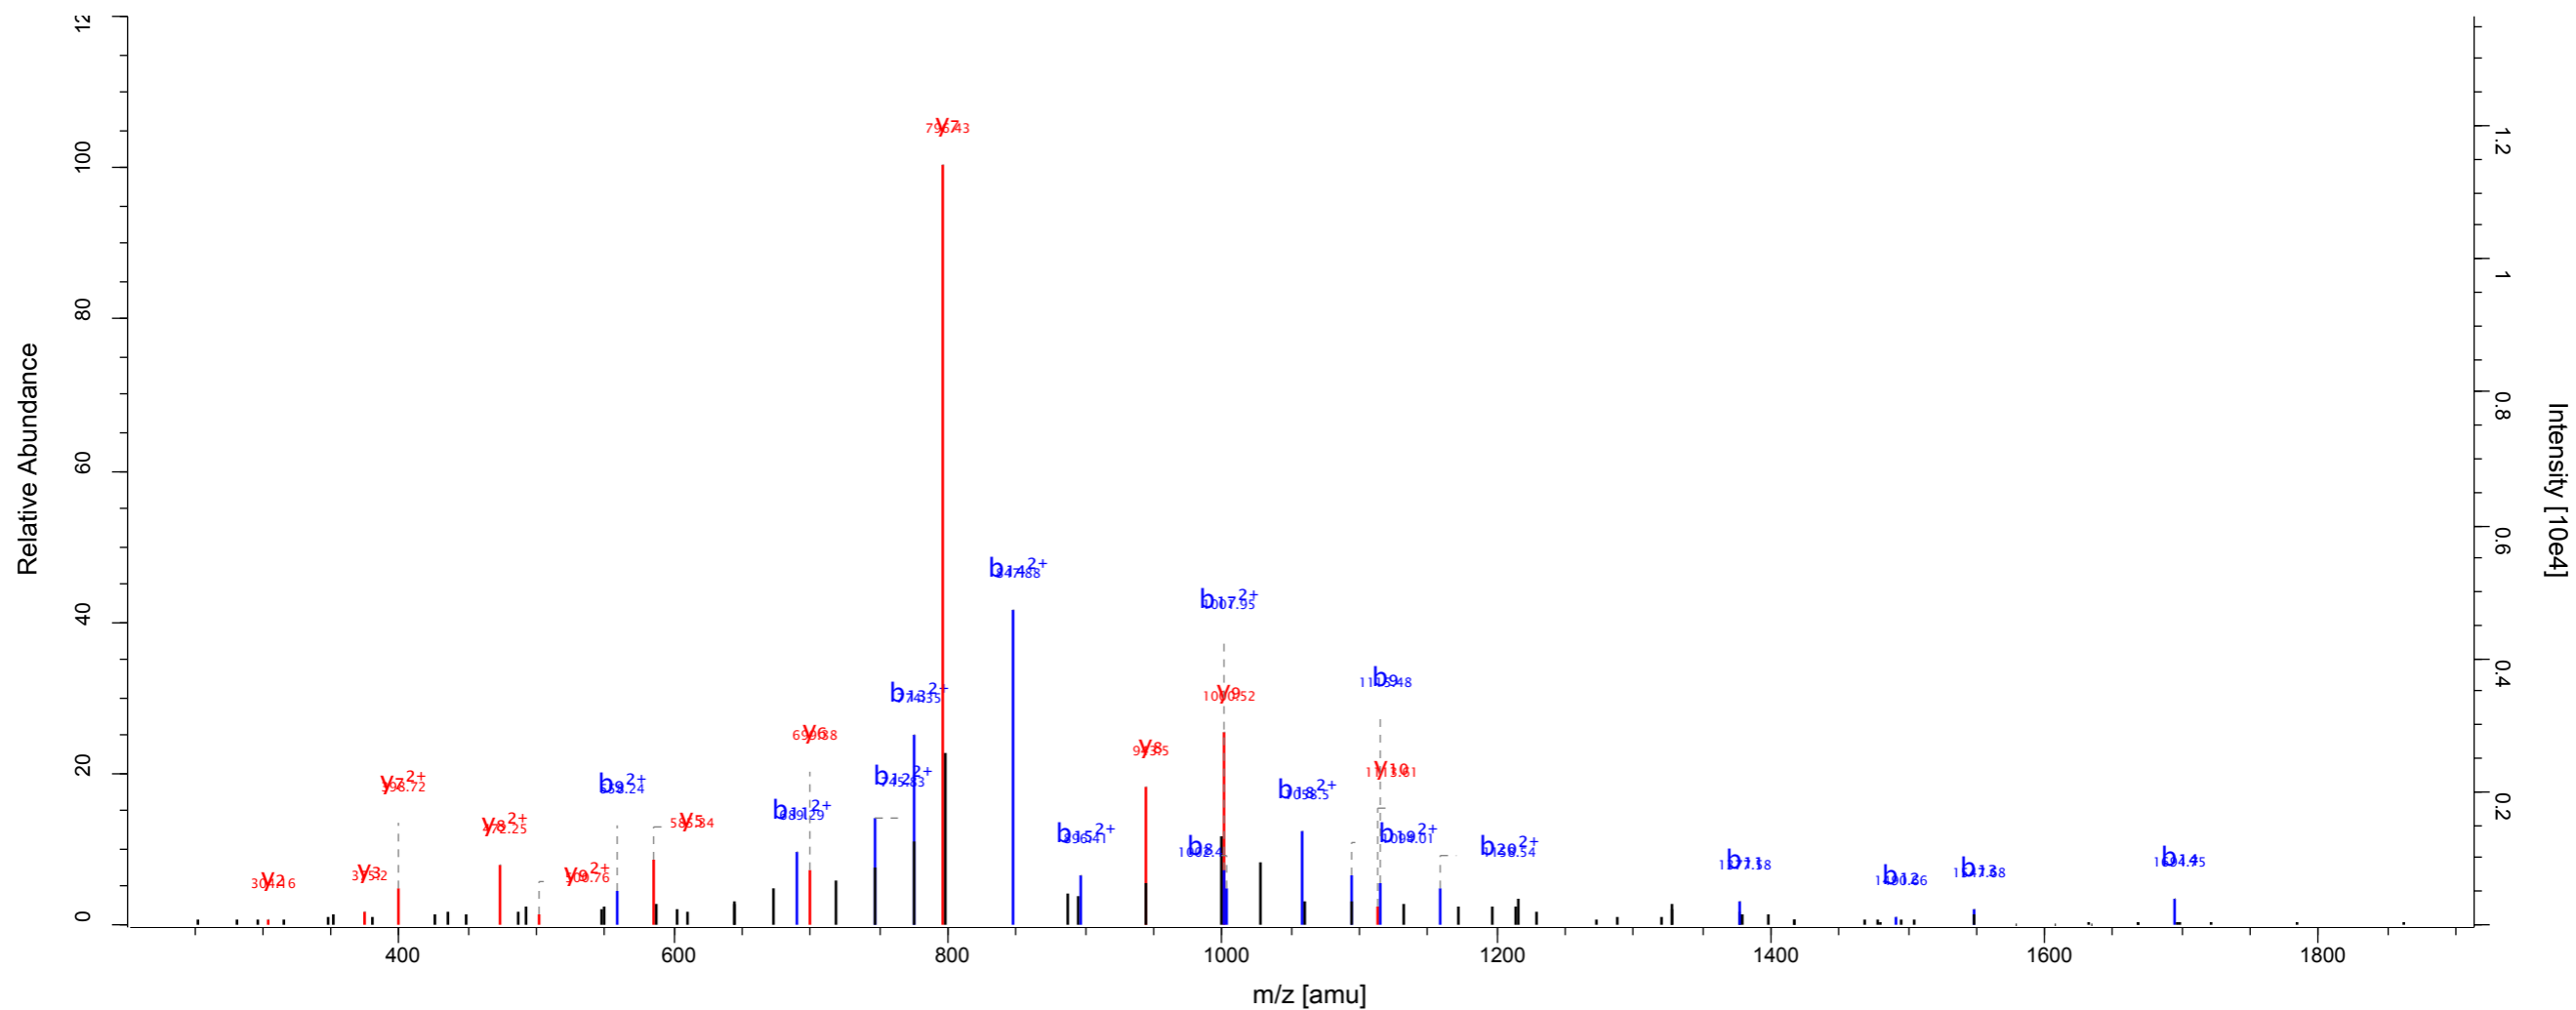

precursor information

|                   |                  |
|-------------------|------------------|
| Mass:             | 2480.16702       |
| m/z:              | 820.72002        |
| Charge:           | 2                |
| Potenttime:       | 128.451552344727 |
| Score:            | 154.8222         |
| Mass Error [ppm]: | 0.24812          |
| DEP:              | 2.4565.12        |
| Precursor Type:   | ISO              |

| b <sup>2+</sup> ion |              | b ion      |              |    |     |    | y ion        |            | y <sup>2+</sup> ion |            |
|---------------------|--------------|------------|--------------|----|-----|----|--------------|------------|---------------------|------------|
| Δ dalton            | mass         | Δ dalton   | mass         |    | seq |    | Δ dalton     | mass       | Δ dalton            | mass       |
|                     | 116.0342195  |            | 116.0342195  | 1  | D   | 20 |              |            |                     |            |
|                     | 276.0648677  |            | 276.0648677  | 2  | C   | 19 | 2375.1488787 |            | 2375.1488787        |            |
|                     | 389.14893168 |            | 389.14893168 | 3  | I   | 18 | 2215.1182305 |            | 2215.1182305        |            |
|                     | 518.19152478 |            | 518.19152478 | 4  | E   | 17 | 2102.0341665 |            | 2102.0341665        |            |
|                     | 655.25043664 |            | 655.25043664 | 5  | H   | 16 | 1972.9915734 |            | 1972.9915734        |            |
|                     | 802.31885056 |            | 802.31885056 | 6  | F   | 15 | 1835.9326615 |            | 1835.9326615        |            |
|                     | 873.35596434 |            | 873.35596434 | 7  | A   | 14 | 1688.8642476 |            | 1688.8642476        |            |
|                     | 1002.3985574 | +0.1904929 | 1002.3985574 | 8  | E   | 13 | 1617.8271338 |            | 1617.8271338        |            |
| +0.1626438          | 558.24494894 | +0.1265094 | 1115.4826214 | 9  | I   | 12 | 1488.7845407 |            | 1488.7845407        |            |
|                     | 1262.5510353 |            | 1262.5510353 | 10 | F   | 11 | 1375.7004768 |            | 1375.7004768        |            |
| +0.0346431          | 689.29262742 | +0.1513917 | 1377.5779784 | 11 | D   | 10 | 1228.6320628 |            | 1228.6320628        |            |
| +0.025448           | 745.83465941 | +0.1333678 | 1490.6620423 | 12 | I   | 9  | 1113.6051198 | +0.1718577 | 1113.6051198        |            |
| +0.0249701          | 774.34539127 | +0.0578269 | 1547.6835061 | 13 | G   | 8  | 1000.5210558 | +0.0797132 | 500.76416615        | +0.2457826 |
| +0.3311562          | 847.87959823 | -0.0176671 | 1694.75192   | 14 | F   | 7  | 943.49959211 | +0.0829274 | 472.25343429        | +0.1473225 |
| +0.17422            | 896.40598015 |            | 1791.8046838 | 15 | P   | 6  | 796.4311782  | +0.0490464 | 398.71922733        | +0.0232653 |
|                     | 1905.8476113 |            | 1905.8476113 | 16 | N   | 5  | 699.37841434 | +0.1766394 | 699.37841434        |            |
| -0.3473195          | 1001.9538258 |            | 2002.9003751 | 17 | P   | 4  | 585.3354869  | +0.211205  | 585.3354869         |            |
| +0.3151774          | 1058.4958578 |            | 2115.9844391 | 18 | I   | 3  | 488.28272305 |            | 488.28272305        |            |
| -0.0206403          | 1094.0144147 |            | 2187.0215529 | 19 | A   | 2  | 375.19865906 | +0.1093854 | 375.19865906        |            |
| +0.4630681          | 1158.5357112 |            | 2316.064146  | 20 | E   | 1  | 304.16154528 | +0.0814967 | 304.16154528        |            |
|                     |              |            |              | 21 | R   | 0  | 175.11895218 |            | 175.11895218        |            |

general information

|                       |             |
|-----------------------|-------------|
| Annotation:           | 12 of 21    |
| AminoAcids Coverage:  | 57%         |
| Intensity Coverage:   | 68%         |
| Peak Coverage:        | 20%         |
| Protein Localisation: | 103 ... 123 |



Scan number 14121 Raw file 20080812\_Orbi1\_SaZa\_SA\_ADH\_Matrigel\_Exp\_1\_30h\_InGel\_04  
 Method ITMS; CID Genenames TSPAN9

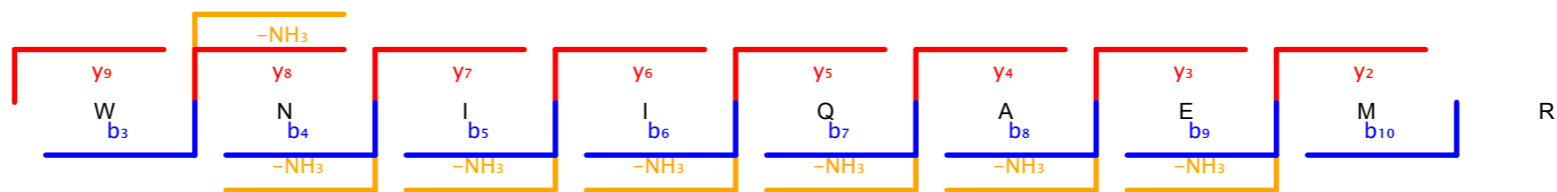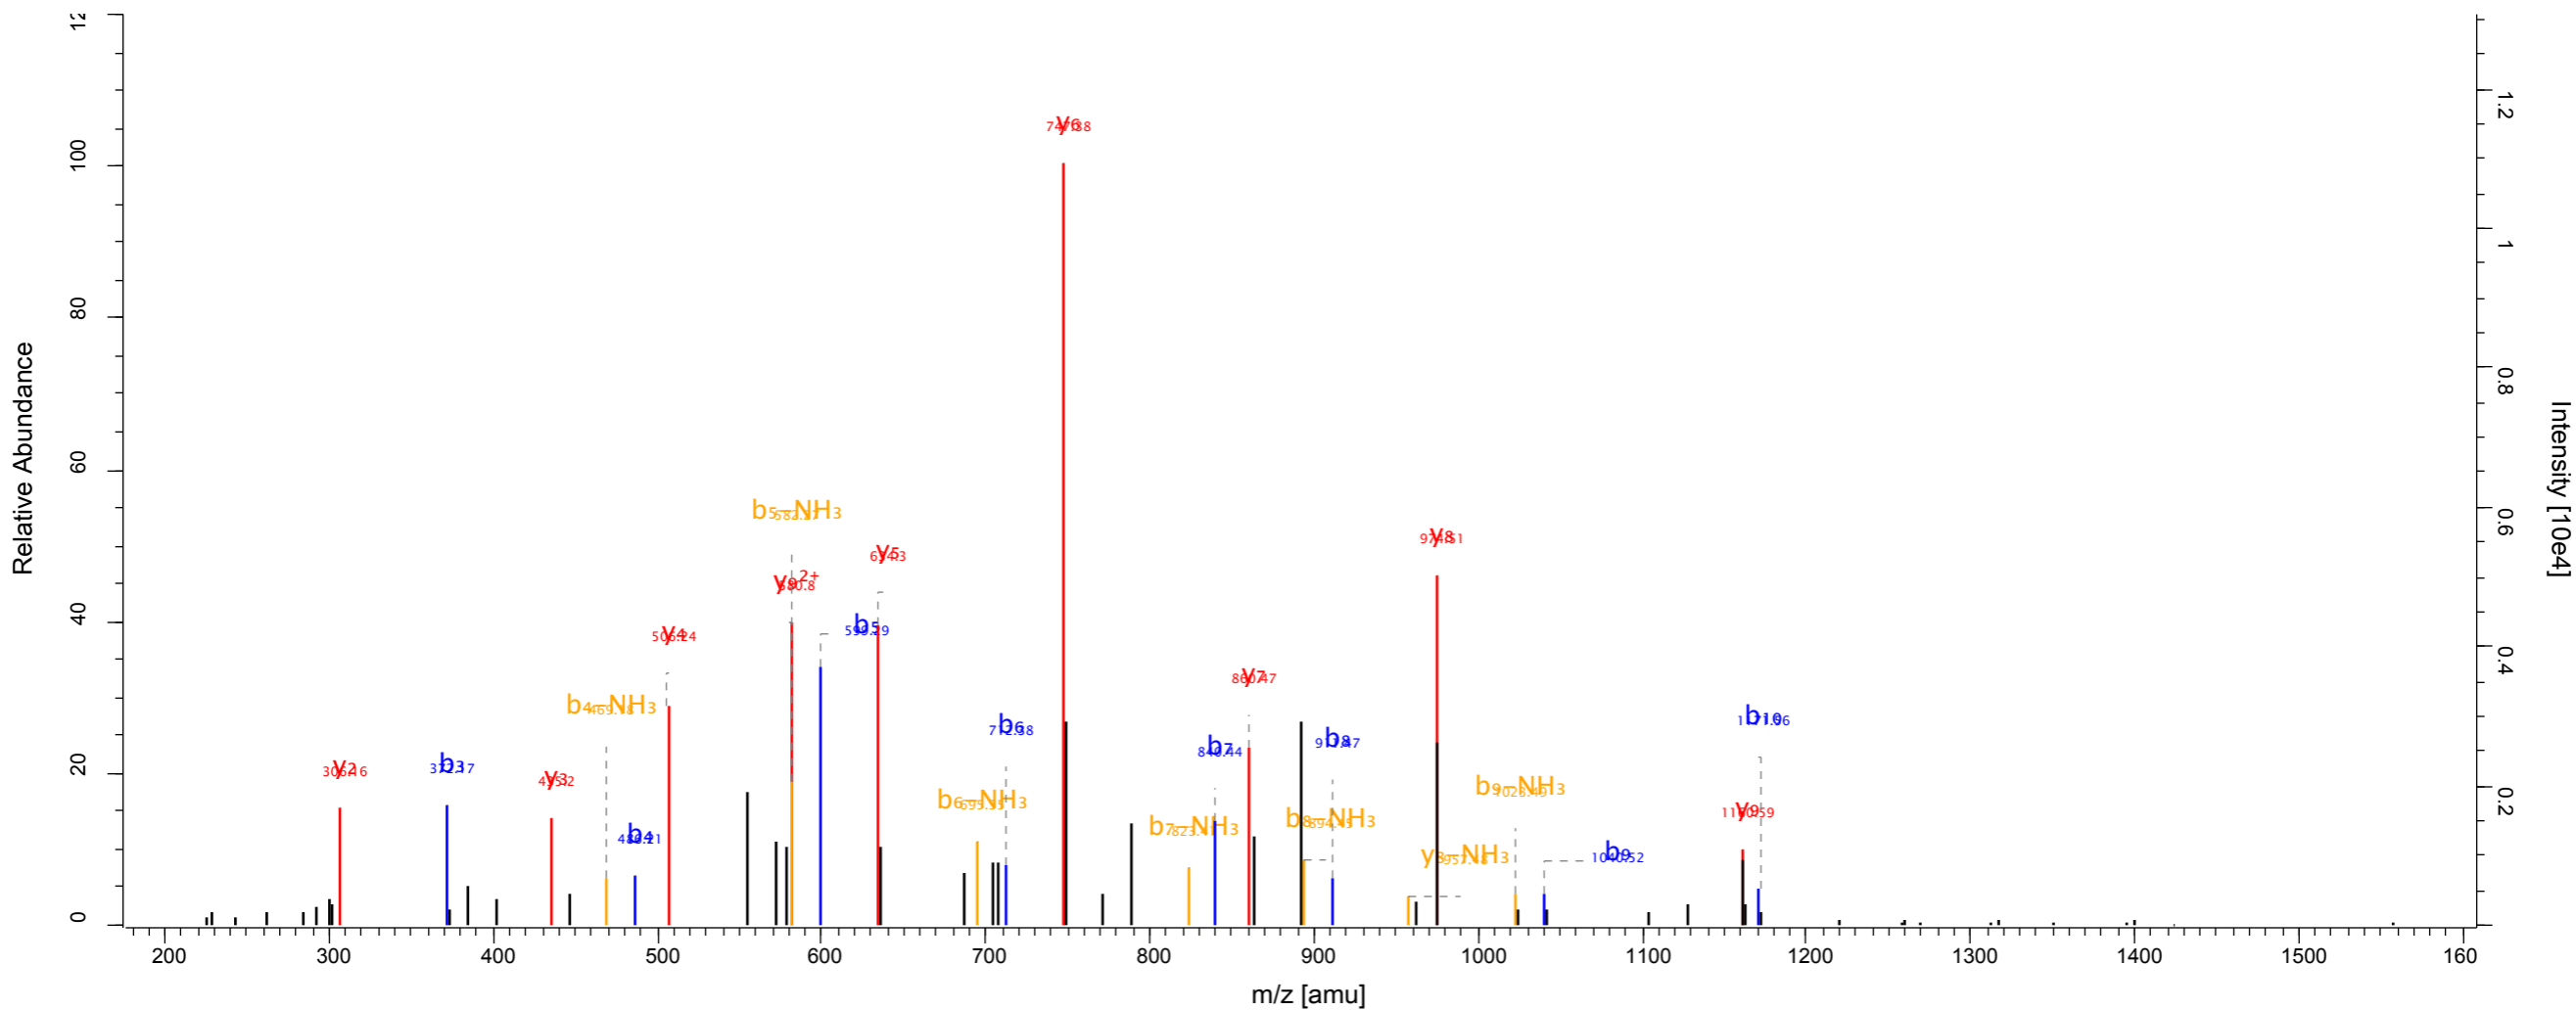

|                       |                 |
|-----------------------|-----------------|
| precursor information |                 |
| Mass:                 | 2007.912        |
| m/z:                  | 670.31228       |
| Charge:               | 3+              |
| Retention time:       | 00.168815612702 |
| Score:                | 177.5722        |
| Mass Error (ppm):     | 0.10576         |
| PEP:                  | 5.9262E-10      |
| Precursor Type:       | MULTI           |
| general information   |                 |
| Annotation:           | 8 of 11         |
| AminoAcids Coverage:  | 72 %            |
| Intensity Coverage:   | 66 %            |
| Peak Coverage:        | 35 %            |
| Protein Localisation: | 136 ... 146     |

| b ion      |                |    |     |    | y ion          |            | y <sup>2+</sup> ion |            |
|------------|----------------|----|-----|----|----------------|------------|---------------------|------------|
| Δ dalton   | mass           |    | seq |    | Δ dalton       | mass       | Δ dalton            | mass       |
|            | 115.050203914  | 1  | N   | 10 |                |            |                     |            |
|            | 186.087317702  | 2  | A   | 9  | 1231.625203332 |            | 1231.625203332      |            |
| +0.1285354 | 372.166630655  | 3  | W   | 8  | 1160.588089544 | -0.0070349 | 580.797683005       | +0.3118751 |
| +0.1740479 | 486.209558102  | 4  | N   | 7  | 974.508776591  | -0.0032224 | 974.508776591       |            |
| +0.0627622 | 599.293622083  | 5  | I   | 6  | 860.465849143  | -0.0215132 | 860.465849143       |            |
| +0.0556025 | 712.377686063  | 6  | I   | 5  | 747.381785163  | +0.050771  | 747.381785163       |            |
| -0.042831  | 840.436263574  | 7  | Q   | 4  | 634.297721183  | +0.0945518 | 634.297721183       |            |
| +0.2001456 | 911.473377362  | 8  | A   | 3  | 506.239143671  | +0.0612103 | 506.239143671       |            |
| -0.0250037 | 1040.515970458 | 9  | E   | 2  | 435.202029883  | +0.0057338 | 435.202029883       |            |
| -0.0673193 | 1171.556455065 | 10 | M   | 1  | 306.159436787  | +0.0568108 | 306.159436787       |            |
|            |                | 11 | R   | 0  | 175.118952181  |            | 175.118952181       |            |

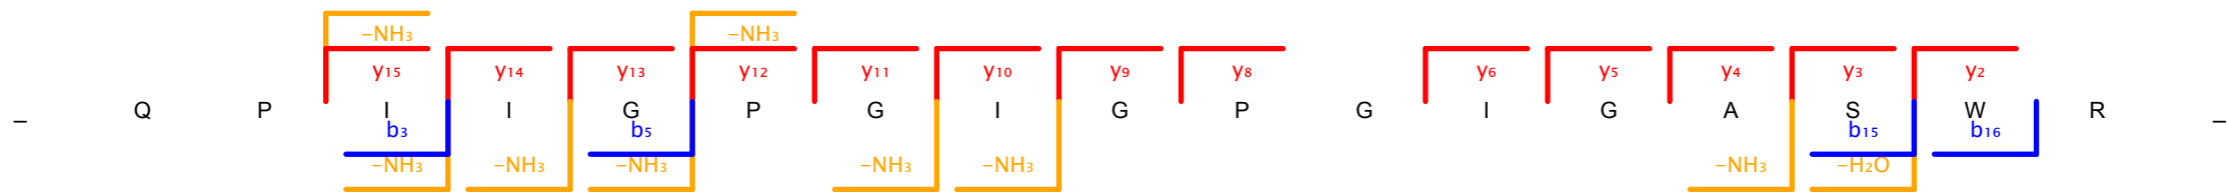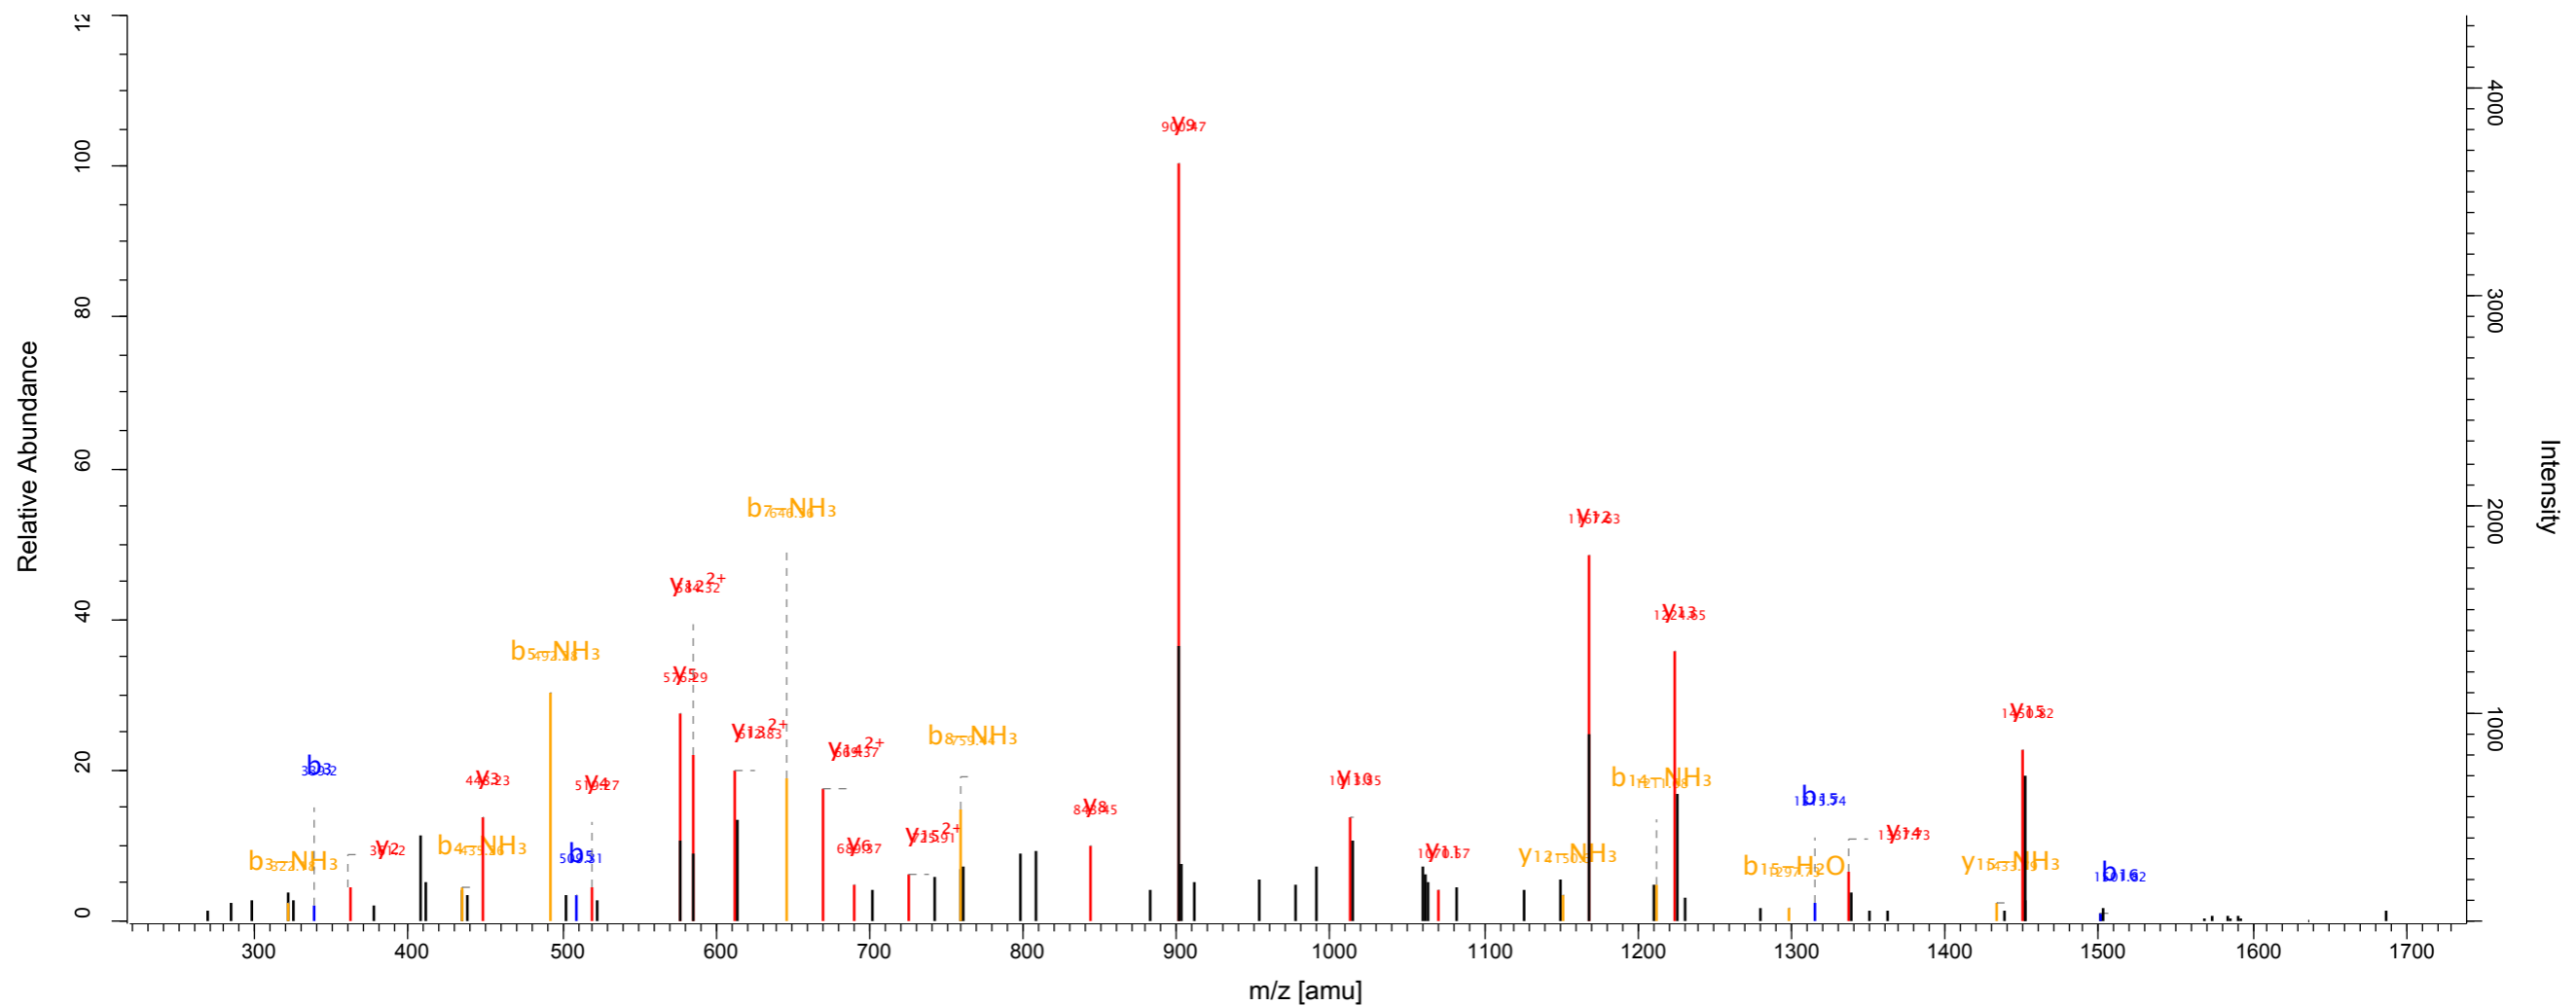

precursor information

|                   |                  |
|-------------------|------------------|
| Mass:             | 1674.82007       |
| m/z:              | 828.46721        |
| Charge:           | 2+               |
| Retention time:   | 101.204124450684 |
| Score:            | 122.4825         |
| Mass Error [ppm]: | 0.3002           |
| DEP:              | 0.00023620       |
| Precursor Type:   | ISO              |

| b ion      |                |    |     |    | y ion          |            | y <sup>2+</sup> ion |            |
|------------|----------------|----|-----|----|----------------|------------|---------------------|------------|
| Δ dalton   | mass           |    | seq |    | Δ dalton       | mass       | Δ dalton            | mass       |
|            | 129.065853978  | 1  | Q   | 16 |                |            |                     |            |
|            | 226.11861783   | 2  | P   | 15 | 1547.869273428 |            | 1547.869273428      |            |
| +0.046128  | 339.20268181   | 3  | I   | 14 | 1450.816509576 | +0.0090519 | 725.911893021       | +0.2048062 |
|            | 452.286745791  | 4  | I   | 13 | 1337.732445595 | -0.0533684 | 669.369861031       | +0.2060057 |
| -0.0980044 | 509.308209514  | 5  | G   | 12 | 1224.648381615 | -0.0094656 | 612.827829041       | -0.0686738 |
|            | 606.360973366  | 6  | P   | 11 | 1167.626917891 | +0.0349473 | 584.317097179       | +0.0749316 |
|            | 663.38243709   | 7  | G   | 10 | 1070.574154039 | -0.0814783 | 1070.574154039      |            |
|            | 776.46650107   | 8  | I   | 9  | 1013.552690316 | -0.0319994 | 1013.552690316      |            |
|            | 833.487964794  | 9  | G   | 8  | 900.468626335  | +0.0365006 | 900.468626335       |            |
|            | 930.540728646  | 10 | P   | 7  | 843.447162612  | +0.0879326 | 843.447162612       |            |
|            | 987.56219237   | 11 | G   | 6  | 746.39439876   |            | 746.39439876        |            |
|            | 1100.64625635  | 12 | I   | 5  | 689.372935036  | -0.0166728 | 689.372935036       |            |
|            | 1157.66720074  | 13 | G   | 4  | 576.288871056  | +0.0794151 | 576.288871056       |            |
|            | 1228.704833861 | 14 | A   | 3  | 519.267407332  | +0.1575805 | 519.267407332       |            |
| -0.1162568 | 1315.736862271 | 15 | S   | 2  | 448.230293544  | +0.1359174 | 448.230293544       |            |
| +0.0694449 | 1501.816175225 | 16 | W   | 1  | 361.198265134  | +0.1221694 | 361.198265134       |            |
|            |                | 17 | R   | 0  | 175.118952181  |            | 175.118952181       |            |

general information

|                       |           |
|-----------------------|-----------|
| Annotation:           | 13 of 17  |
| AminoAcids Coverage:  | 76 %      |
| Intensity Coverage:   | 58 %      |
| Peak Coverage:        | 25 %      |
| Protein Localisation: | 12 ... 28 |

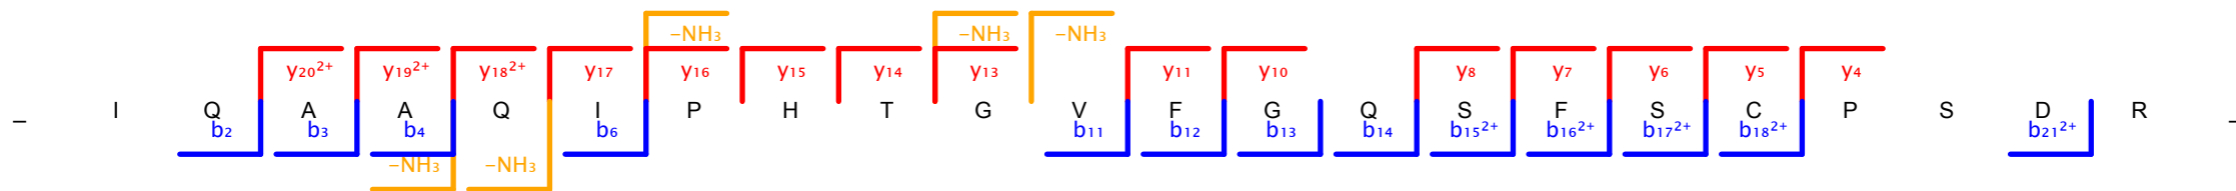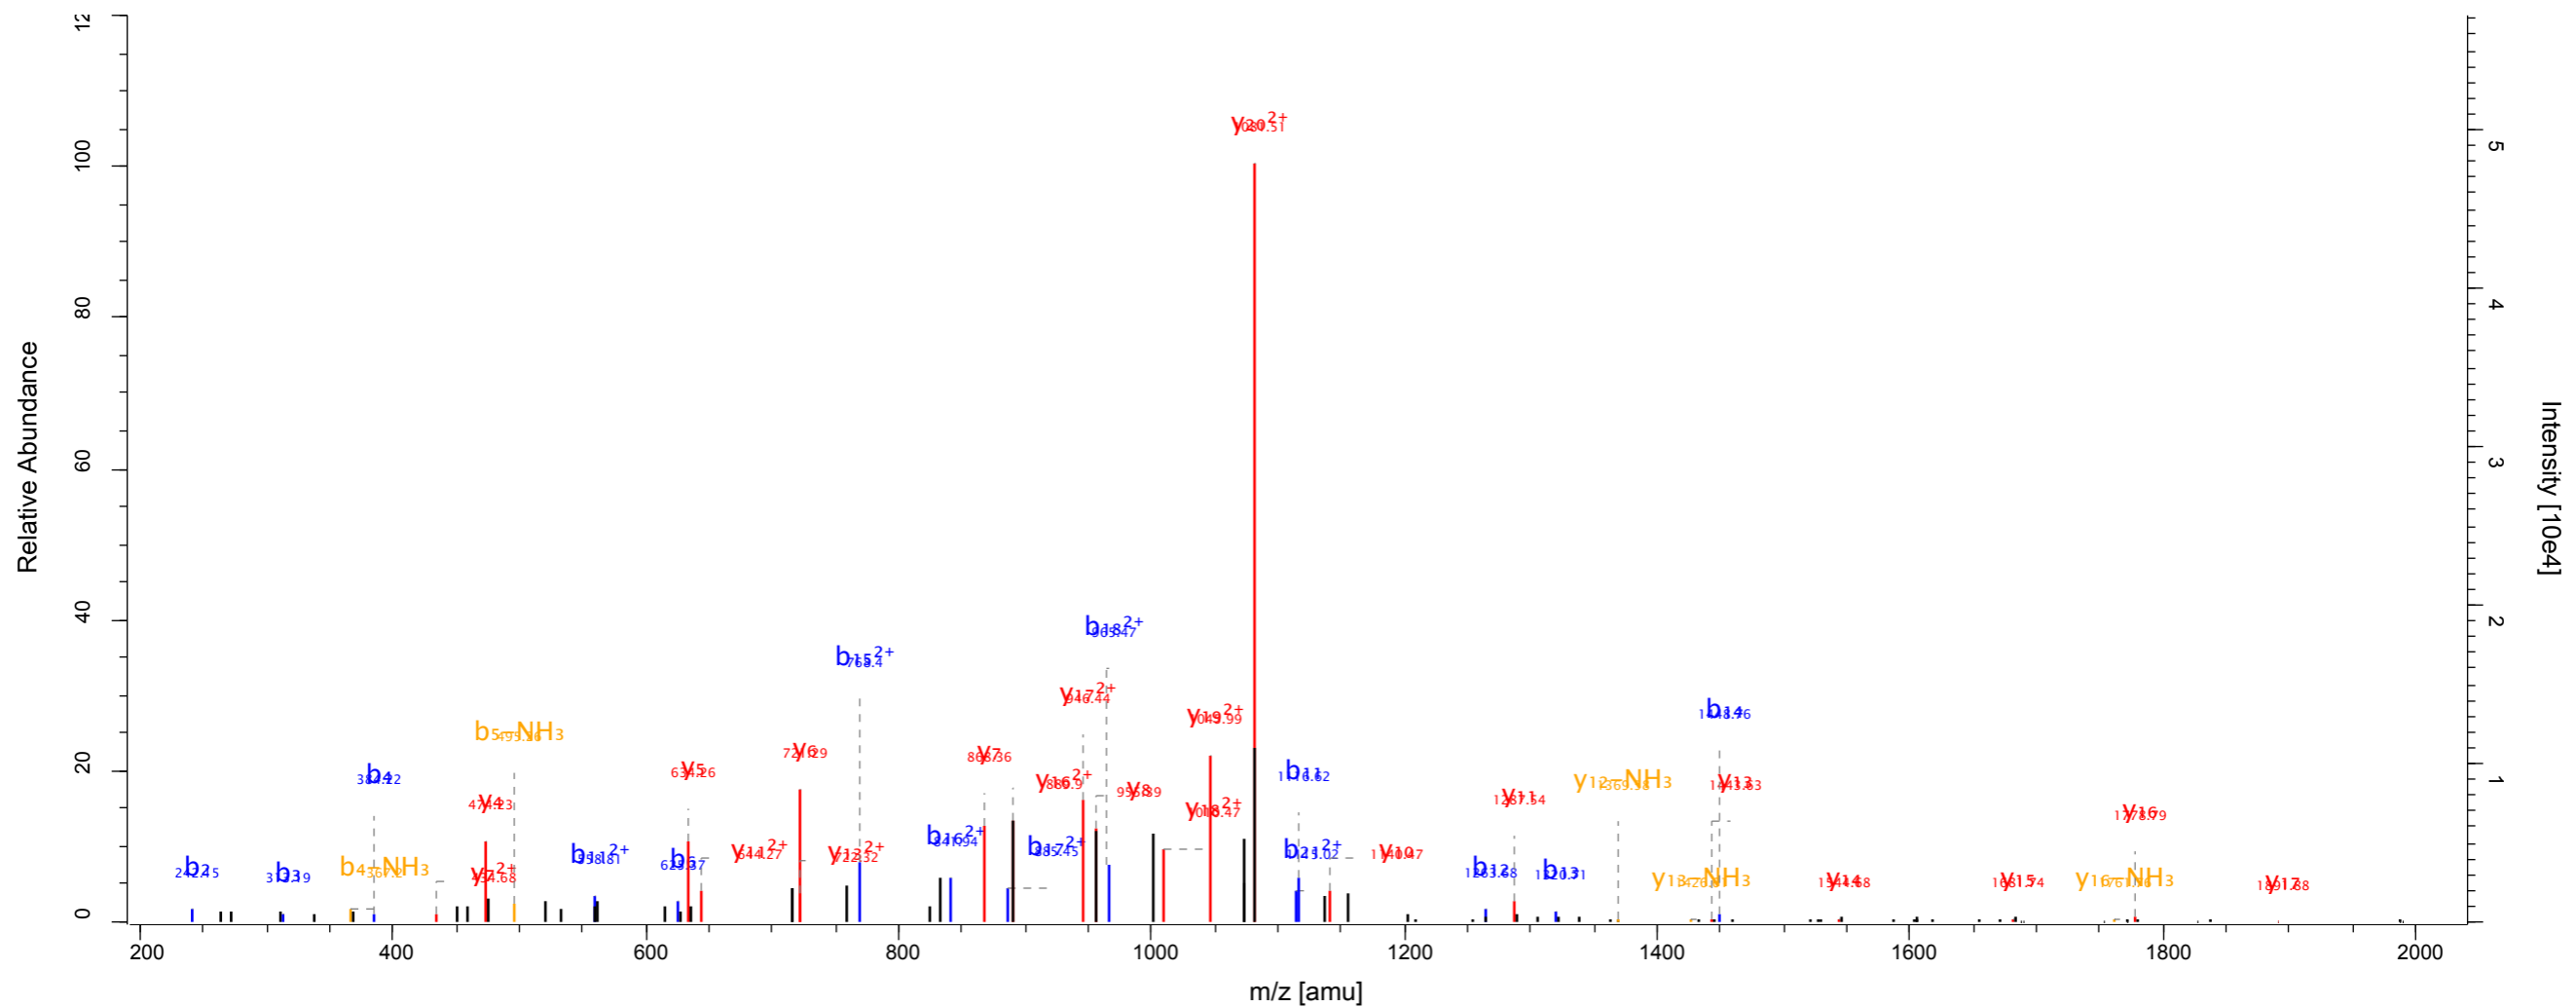

precursor information

|                   |                  |
|-------------------|------------------|
| Mass:             | 2402.14278       |
| m/z:              | 801.72187        |
| Charge:           | 2+               |
| Retention time:   | 70.8280802578125 |
| Score:            | 104.0258         |
| Mass Error (ppm): | 0.020242         |
| DEP:              | 5.70745_57       |
| Precursor Type:   | MULTI            |

|  | b <sup>2+</sup> ion |              | b ion      |              | seq |   | y ion    |              | y <sup>2+</sup> ion |                         |
|--|---------------------|--------------|------------|--------------|-----|---|----------|--------------|---------------------|-------------------------|
|  | Δ dalton            | mass         | Δ dalton   | mass         |     |   | Δ dalton | mass         | Δ dalton            | mass                    |
|  |                     | 114.09134045 |            | 114.09134045 | 1   | I | 21       |              |                     |                         |
|  |                     | 242.14991796 | -0.2574009 | 242.14991796 | 2   | Q | 20       | 2290.06694   |                     | 2290.06694              |
|  |                     | 313.18703175 | +0.0010786 | 313.18703175 | 3   | A | 19       | 2162.0083625 |                     | 1081.5078195 +0.2900321 |
|  |                     | 384.22414553 | -0.0456787 | 384.22414553 | 4   | A | 18       | 2090.9712487 |                     | 1045.9892626 +0.2810011 |
|  |                     | 512.28272305 |            | 512.28272305 | 5   | Q | 17       | 2019.9341349 |                     | 1010.4707057 +0.2534765 |
|  |                     | 625.36678703 | +0.0220069 | 625.36678703 | 6   | I | 16       | 1891.8755574 | +0.0776897          | 946.44141692 +0.3536881 |
|  |                     | 722.41955088 |            | 722.41955088 | 7   | P | 15       | 1778.7914934 | -0.044301           | 889.89938493 +0.0133958 |
|  |                     | 859.47846274 |            | 859.47846274 | 8   | H | 14       | 1681.7387295 | -0.0664883          | 1681.7387295            |
|  |                     | 960.52614121 |            | 960.52614121 | 9   | T | 13       | 1544.6798177 | +0.2221599          | 1544.6798177            |
|  |                     | 1017.5476049 |            | 1017.5476049 | 10  | G | 12       | 1443.6321392 | +0.116518           | 722.31970783 -0.0044002 |
|  | +0.029722           | 558.81164766 | -0.1296907 | 1116.6160189 | 11  | V | 11       | 1386.6106755 |                     | 1386.6106755            |
|  |                     | 1263.6844328 | +0.1355135 | 1263.6844328 | 12  | F | 10       | 1287.5422616 | +0.1207023          | 644.27476902 +0.1331289 |
|  |                     | 1320.7058965 | +0.1194209 | 1320.7058965 | 13  | G | 9        | 1140.4738476 | -0.1104443          | 1140.4738476            |
|  |                     | 1448.764474  | -0.1432582 | 1448.764474  | 14  | Q | 8        | 1083.4523839 |                     | 1083.4523839            |
|  | +0.3191189          | 768.40188944 |            | 1535.7965024 | 15  | S | 7        | 955.39380641 | +0.0269089          | 955.39380641            |
|  | -0.1242068          | 841.9360964  |            | 1682.8649163 | 16  | F | 6        | 868.361778   | +0.0634539          | 434.68452723 -0.0171688 |
|  | +0.1818616          | 885.4521106  |            | 1769.8969447 | 17  | S | 5        | 721.29336409 | +0.1354079          | 721.29336409            |
|  | +0.1849701          | 965.4674347  |            | 1929.9275929 | 18  | C | 4        | 634.26133568 | +0.0928513          | 634.26133568            |
|  |                     | 2026.9803568 |            | 2026.9803568 | 19  | P | 3        | 474.23068747 | +0.1203257          | 474.23068747            |
|  |                     | 2114.0123852 |            | 2114.0123852 | 20  | S | 2        | 377.17792362 |                     | 377.17792362            |
|  | +0.294935           | 1115.0233024 |            | 2229.0393282 | 21  | D | 1        | 290.14589521 |                     | 290.14589521            |
|  |                     |              |            |              | 22  | R | 0        | 175.11895218 |                     | 175.11895218            |

general information

|                       |             |
|-----------------------|-------------|
| Annotation:           | 10 of 22    |
| AminoAcids Coverage:  | 86 %        |
| Intensity Coverage:   | 67 %        |
| Peak Coverage:        | 28 %        |
| Protein Localisation: | 297 ... 318 |

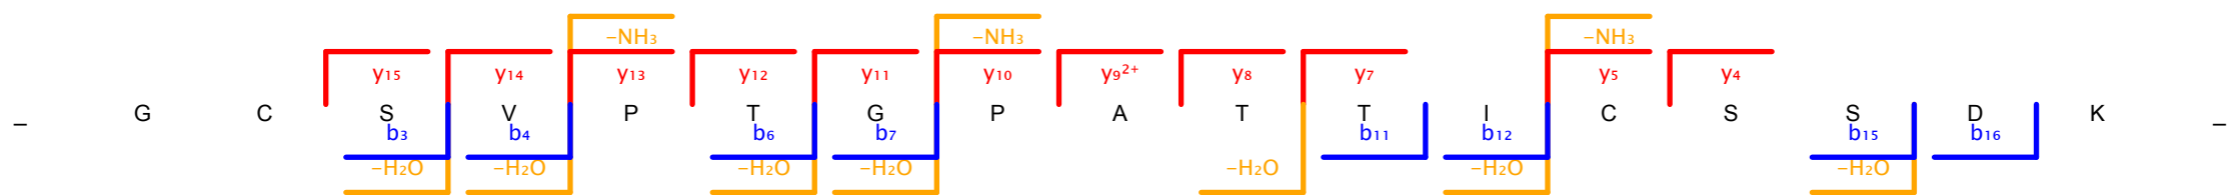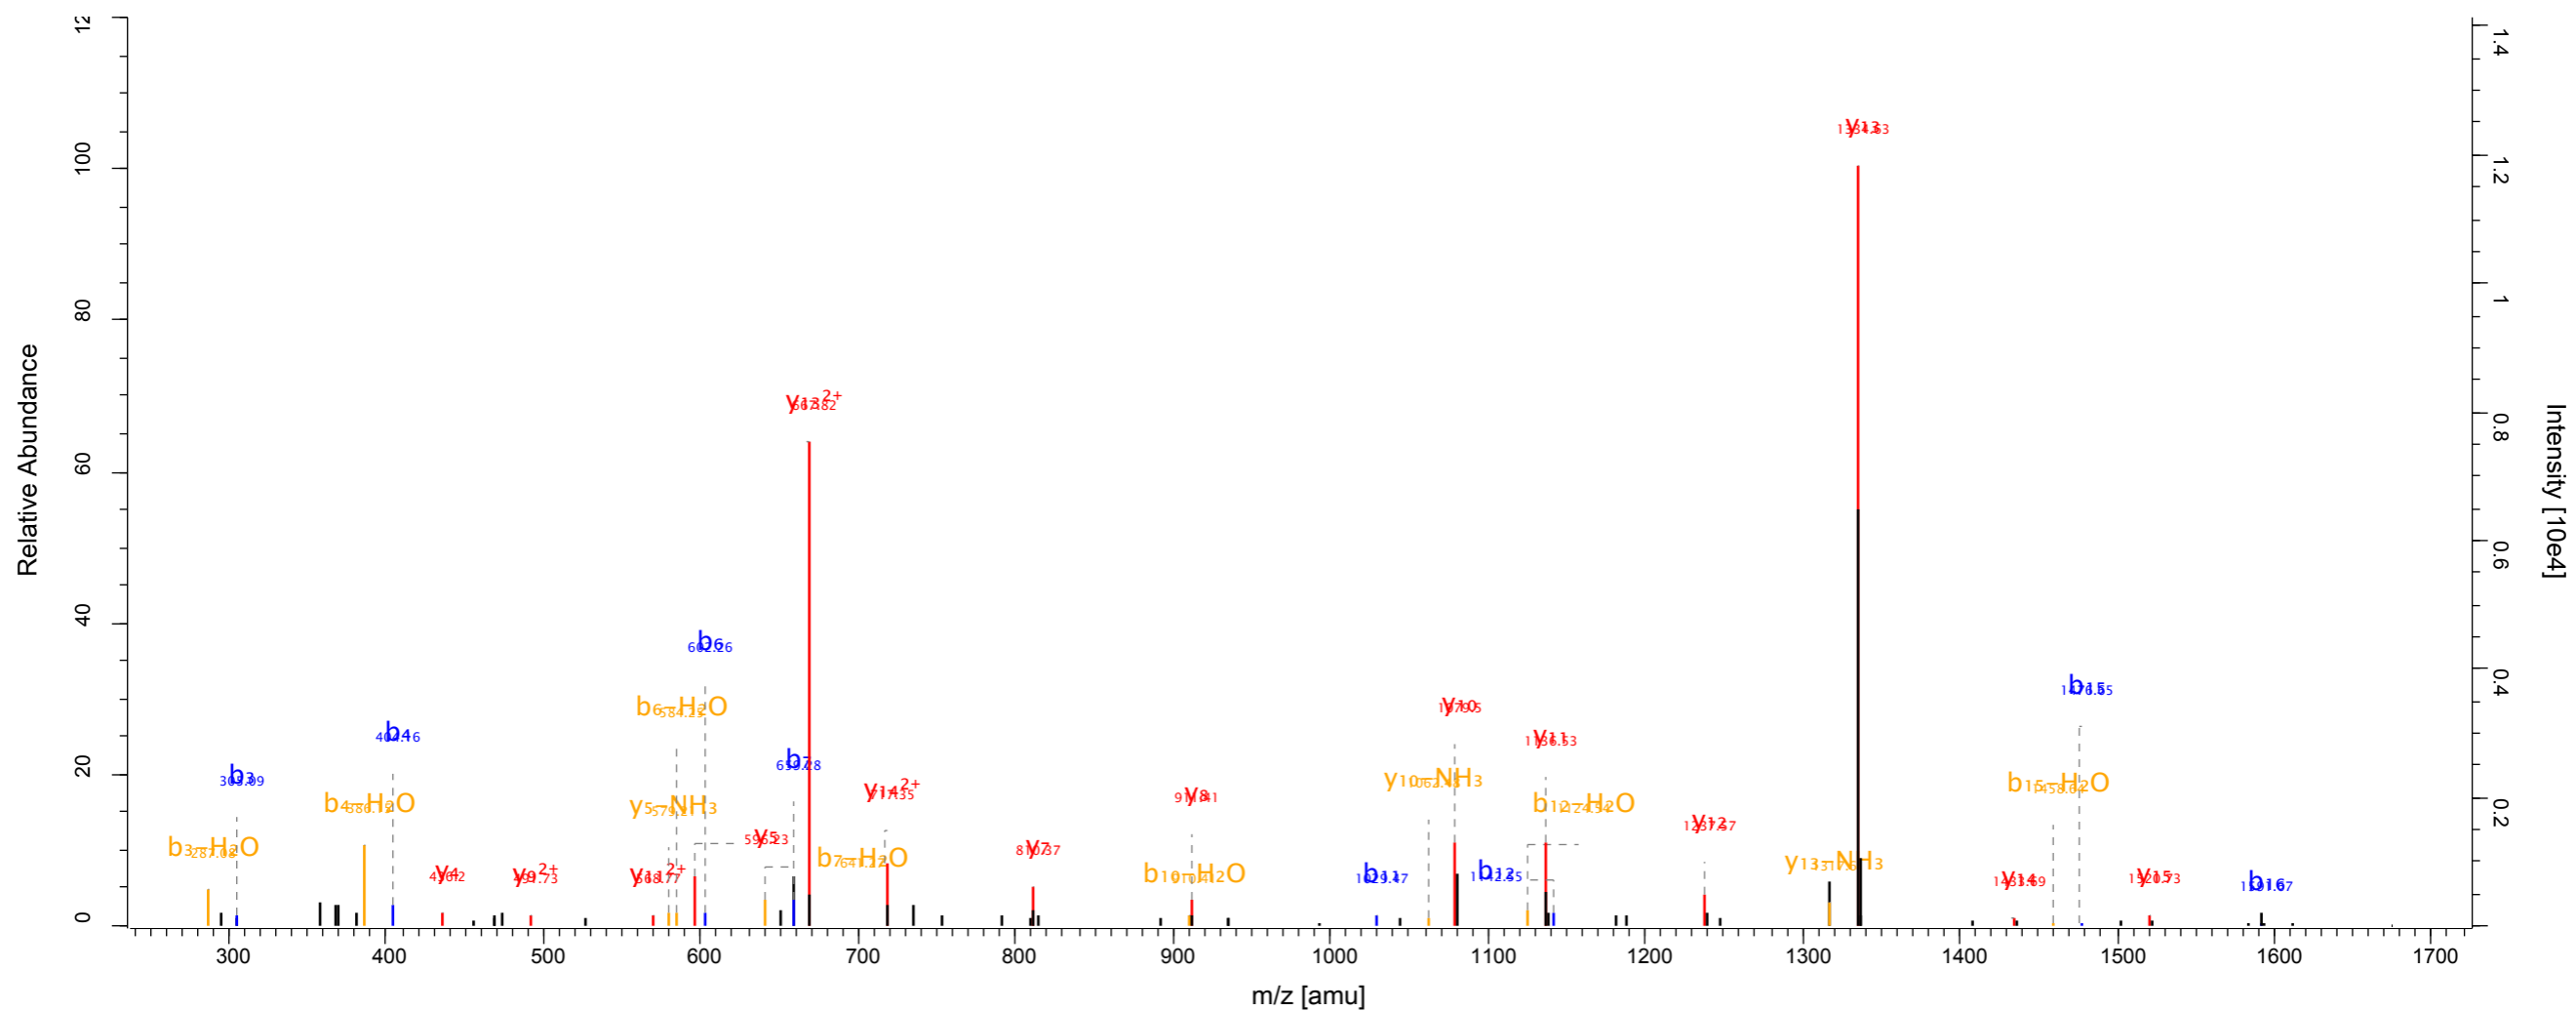

precursor information

|                   |                  |
|-------------------|------------------|
| Mass:             | 1726.771         |
| m/z:              | 860.20278        |
| Charge:           | 2+               |
| Retention time:   | 63.2507618102027 |
| Score:            | 107.1886         |
| Mass Error [ppm]: | 0.027861         |
| DEP:              | 2.8762525        |
| Precursor Type:   | ISO              |

| b ion      |                |    |     |    | y ion          |            | y <sup>2+</sup> ion |            |
|------------|----------------|----|-----|----|----------------|------------|---------------------|------------|
| Δ dalton   | mass           |    | seq |    | Δ dalton       | mass       | Δ dalton            | mass       |
|            | 58.02874019    | 1  | G   | 16 |                |            |                     |            |
|            | 218.059388392  | 2  | C   | 15 | 1680.756747369 |            | 1680.756747369      |            |
| +0.2565751 | 305.091416802  | 3  | S   | 14 | 1520.726099168 | -0.0058843 | 1520.726099168      |            |
| +0.0510457 | 404.159830718  | 4  | V   | 13 | 1433.694070758 | +0.3139859 | 717.350673612       | +0.2525979 |
|            | 501.21259457   | 5  | P   | 12 | 1334.625656842 | +0.0263207 | 667.816466654       | +0.2862555 |
| +0.3663749 | 602.260273044  | 6  | T   | 11 | 1237.57289299  | -0.0236987 | 1237.57289299       |            |
| +0.2278458 | 659.281736767  | 7  | G   | 10 | 1136.525214516 | +0.0430228 | 568.766245491       | +0.0250753 |
|            | 756.334500619  | 8  | P   | 9  | 1079.503750792 | -0.0198641 | 1079.503750792      |            |
|            | 827.371614407  | 9  | A   | 8  | 982.45098694   |            | 491.729131703       | +0.2531681 |
|            | 928.419292881  | 10 | T   | 7  | 911.413873152  | +0.1001039 | 911.413873152       |            |
| +0.0955286 | 1029.466971355 | 11 | T   | 6  | 810.366194678  | +0.20955   | 810.366194678       |            |
| +0.0834861 | 1142.551035336 | 12 | I   | 5  | 709.318516204  |            | 709.318516204       |            |
|            | 1302.581683537 | 13 | C   | 4  | 596.234452224  | +0.1021567 | 596.234452224       |            |
|            | 1389.613711947 | 14 | S   | 3  | 436.203804022  | +0.1025314 | 436.203804022       |            |
| +0.4705927 | 1476.645740357 | 15 | S   | 2  | 349.171775612  |            | 349.171775612       |            |
| -0.4726101 | 1591.672683389 | 16 | D   | 1  | 262.139747203  |            | 262.139747203       |            |
|            |                | 17 | K   | 0  | 147.112804171  |            | 147.112804171       |            |

general information

|                       |          |
|-----------------------|----------|
| Annotation:           | 14 of 17 |
| AminoAcids Coverage:  | 82 %     |
| Intensity Coverage:   | 64 %     |
| Peak Coverage:        | 41 %     |
| Protein Localisation: | 8 ... 24 |

Scan number 14342 Raw file 20080910\_Orbi4\_SaZa\_SA\_ADH\_Matrigel\_Exp\_1\_12h\_InGel\_08  
 Method ITMS; CID Genenames CAPS2

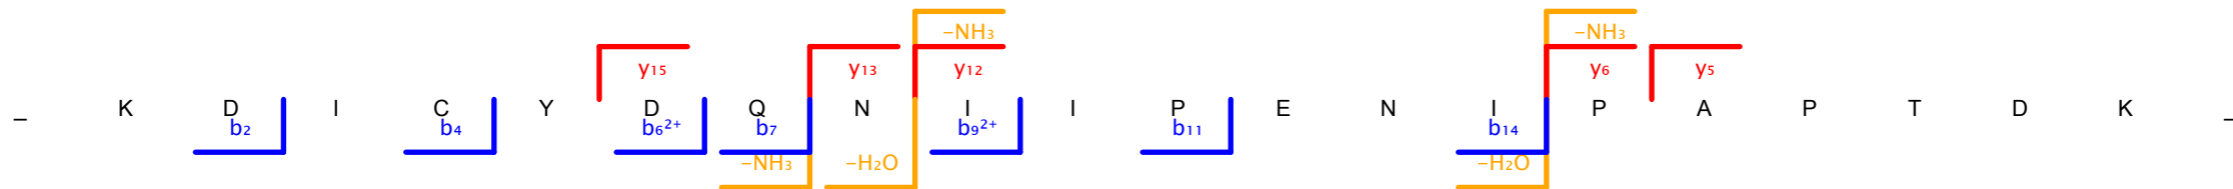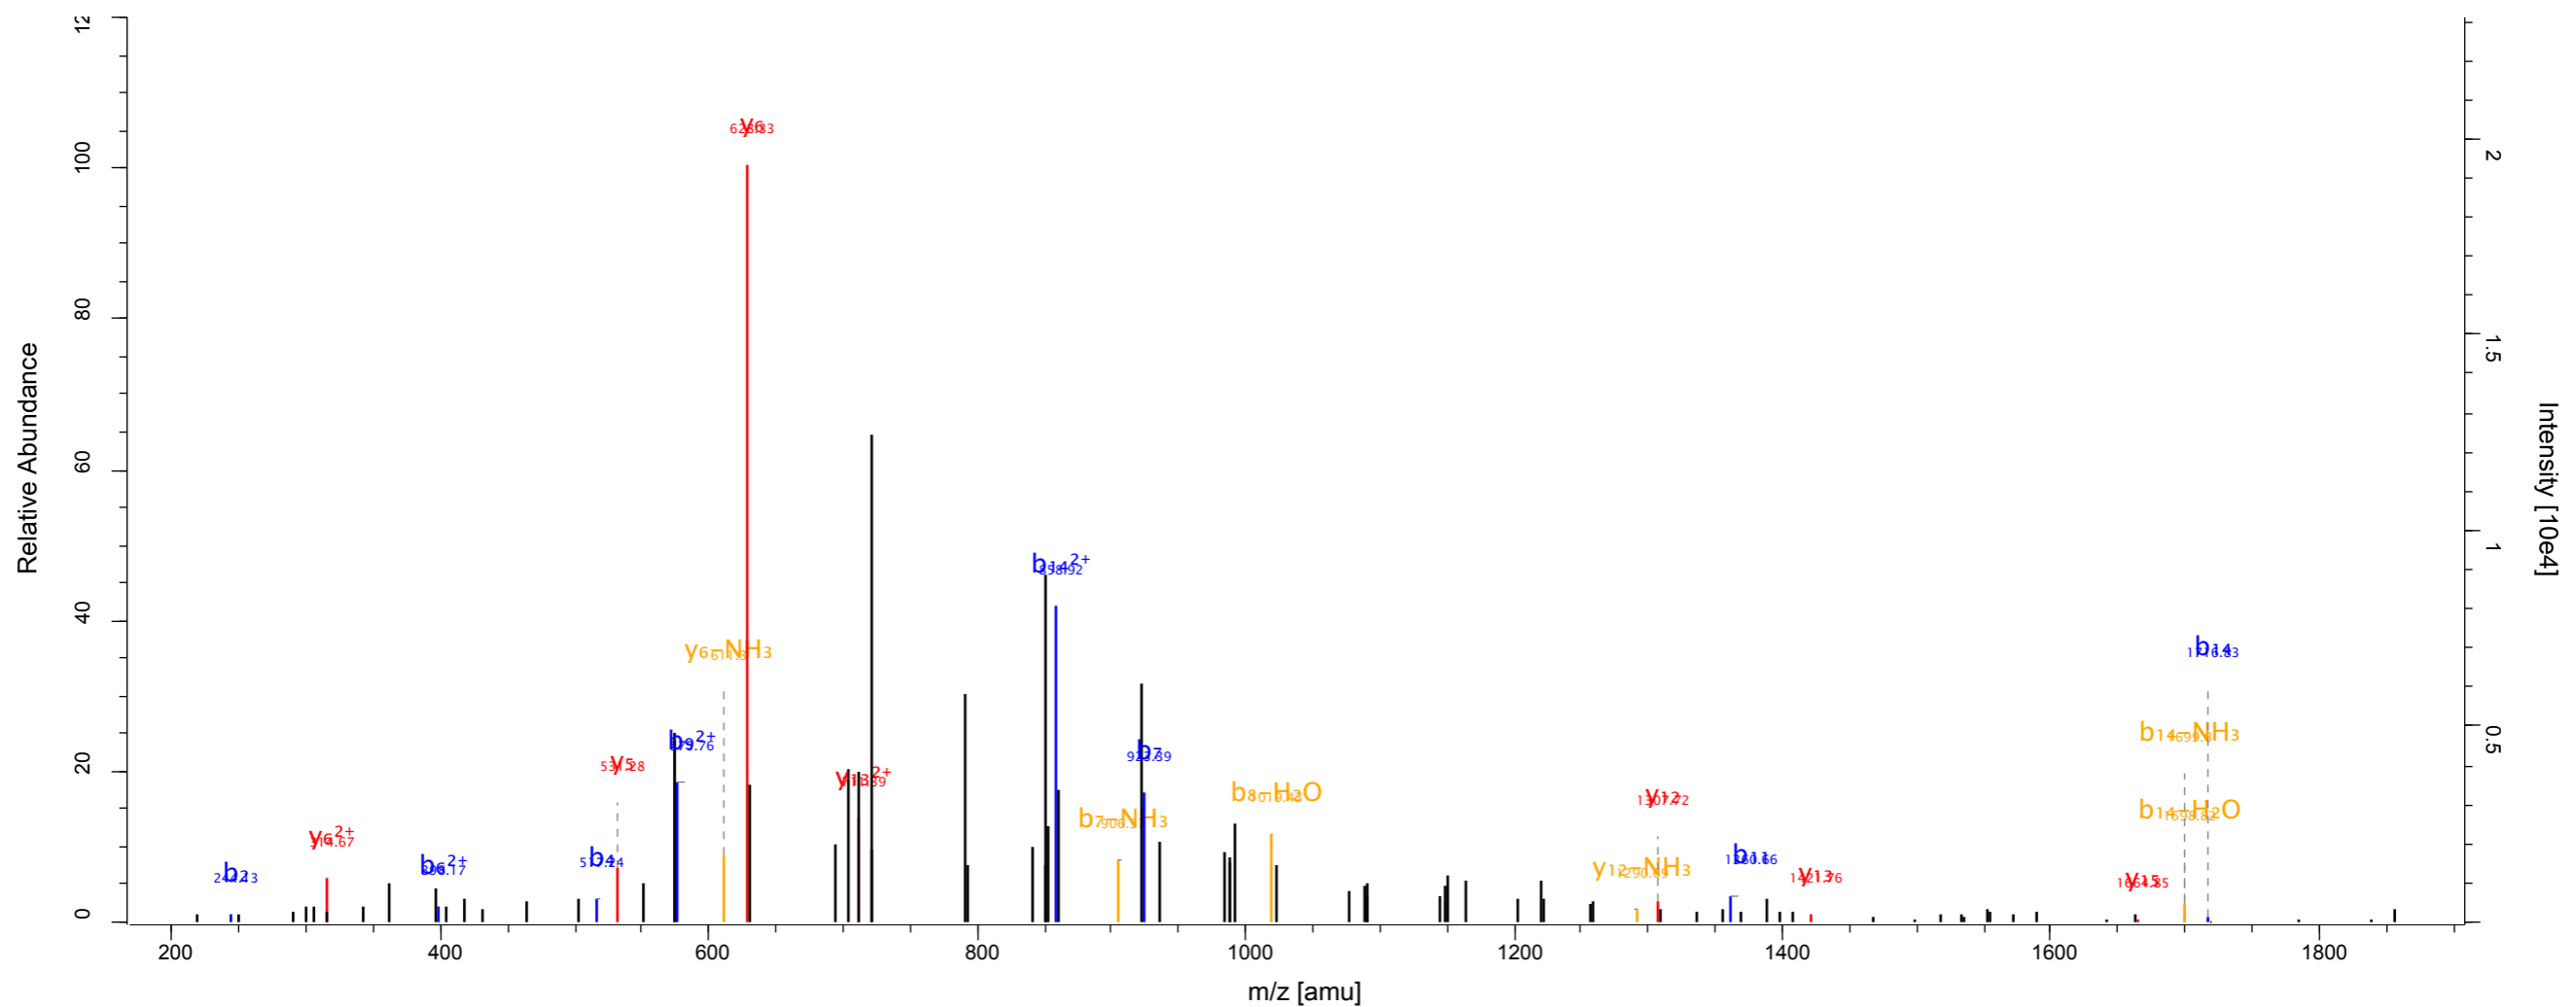

precursor information

|                   |                  |
|-------------------|------------------|
| Mass:             | 2242.14571       |
| m/z:              | 782.05585        |
| Charge:           | 2                |
| Retention time:   | 00.0000008447266 |
| Score:            | 85.56225         |
| Mass Error (ppm): | 1.7268           |
| DEP:              | 2.80865_05       |
| Precursor Type:   | MULTI            |

| b <sup>2+</sup> ion |              | b ion      |              |    |     |    | y ion        |            | y <sup>2+</sup> ion |            |
|---------------------|--------------|------------|--------------|----|-----|----|--------------|------------|---------------------|------------|
| Δ dalton            | mass         | Δ dalton   | mass         |    | seq |    | Δ dalton     | mass       | Δ dalton            | mass       |
|                     | 129.10223948 |            | 129.10223948 | 1  | K   | 19 |              |            |                     |            |
|                     | 244.12918252 | +0.0507796 | 244.12918252 | 2  | D   | 18 | 2216.0539752 |            | 2216.0539752        |            |
|                     | 357.2132465  |            | 357.2132465  | 3  | I   | 17 | 2101.0270322 |            | 2101.0270322        |            |
|                     | 517.2438947  | -0.2640973 | 517.2438947  | 4  | C   | 16 | 1987.9429682 |            | 1987.9429682        |            |
|                     | 680.30722324 |            | 680.30722324 | 5  | Y   | 15 | 1827.91232   |            | 1827.91232          |            |
| -0.1087707          | 398.17072137 |            | 795.33416627 | 6  | D   | 14 | 1664.8489915 | +0.040779  | 1664.8489915        |            |
|                     | 923.39274378 | +0.1833671 | 923.39274378 | 7  | Q   | 13 | 1549.8220485 |            | 1549.8220485        |            |
|                     | 1037.4356712 |            | 1037.4356712 | 8  | N   | 12 | 1421.763471  | +0.232989  | 711.38537371        | -0.0065285 |
| -0.1958178          | 575.76350584 |            | 1150.5197352 | 9  | I   | 11 | 1307.7205435 | -0.1017691 | 1307.7205435        |            |
|                     | 1263.6037992 |            | 1263.6037992 | 10 | I   | 10 | 1194.6364795 |            | 1194.6364795        |            |
|                     | 1360.656563  | +0.2085493 | 1360.656563  | 11 | P   | 9  | 1081.5524155 |            | 1081.5524155        |            |
|                     | 1489.6991561 |            | 1489.6991561 | 12 | E   | 8  | 984.49965169 |            | 984.49965169        |            |
|                     | 1603.7420836 |            | 1603.7420836 | 13 | N   | 7  | 855.4570586  |            | 855.4570586         |            |
| -0.0570318          | 858.91671202 | +0.0265136 | 1716.8261476 | 14 | I   | 6  | 741.41413115 |            | 741.41413115        |            |
|                     | 1813.8789114 |            | 1813.8789114 | 15 | P   | 5  | 628.33006717 | +0.2305407 | 314.66867182        | +0.2102039 |
|                     | 1884.9160252 |            | 1884.9160252 | 16 | A   | 4  | 531.27730332 | +0.2638344 | 531.27730332        |            |
|                     | 1981.9687891 |            | 1981.9687891 | 17 | P   | 3  | 460.24018953 |            | 460.24018953        |            |
|                     | 2083.0164675 |            | 2083.0164675 | 18 | T   | 2  | 363.18742568 |            | 363.18742568        |            |
|                     | 2198.0434106 |            | 2198.0434106 | 19 | D   | 1  | 262.1397472  |            | 262.1397472         |            |
|                     |              |            |              | 20 | K   | 0  | 147.11280417 |            | 147.11280417        |            |

general information

|                       |          |
|-----------------------|----------|
| Annotation:           | 10 of 20 |
| AminoAcids Coverage:  | 50 %     |
| Intensity Coverage:   | 22 %     |
| Peak Coverage:        | 22 %     |
| Protein Localisation: | 7 ... 26 |

Scan number 10563 Raw file 20080924\_Orbi6\_SaZa\_SA\_ADH\_Matrigel\_12h\_Exp1\_InGel\_14  
 Method ITMS; CID Genenames SELE

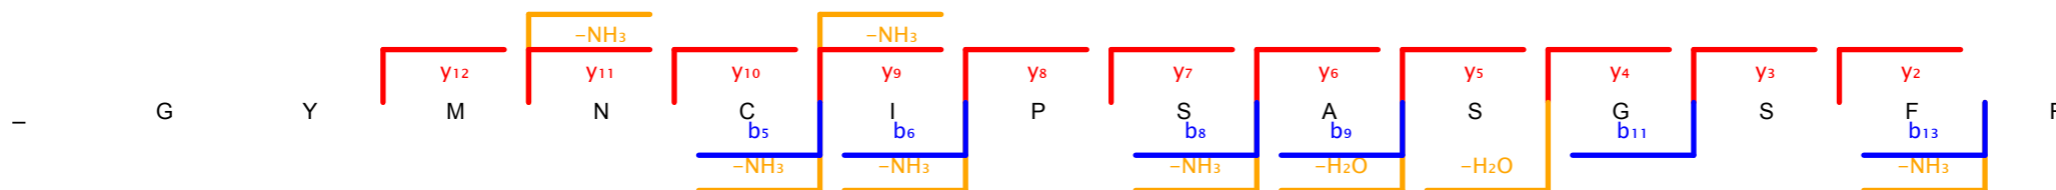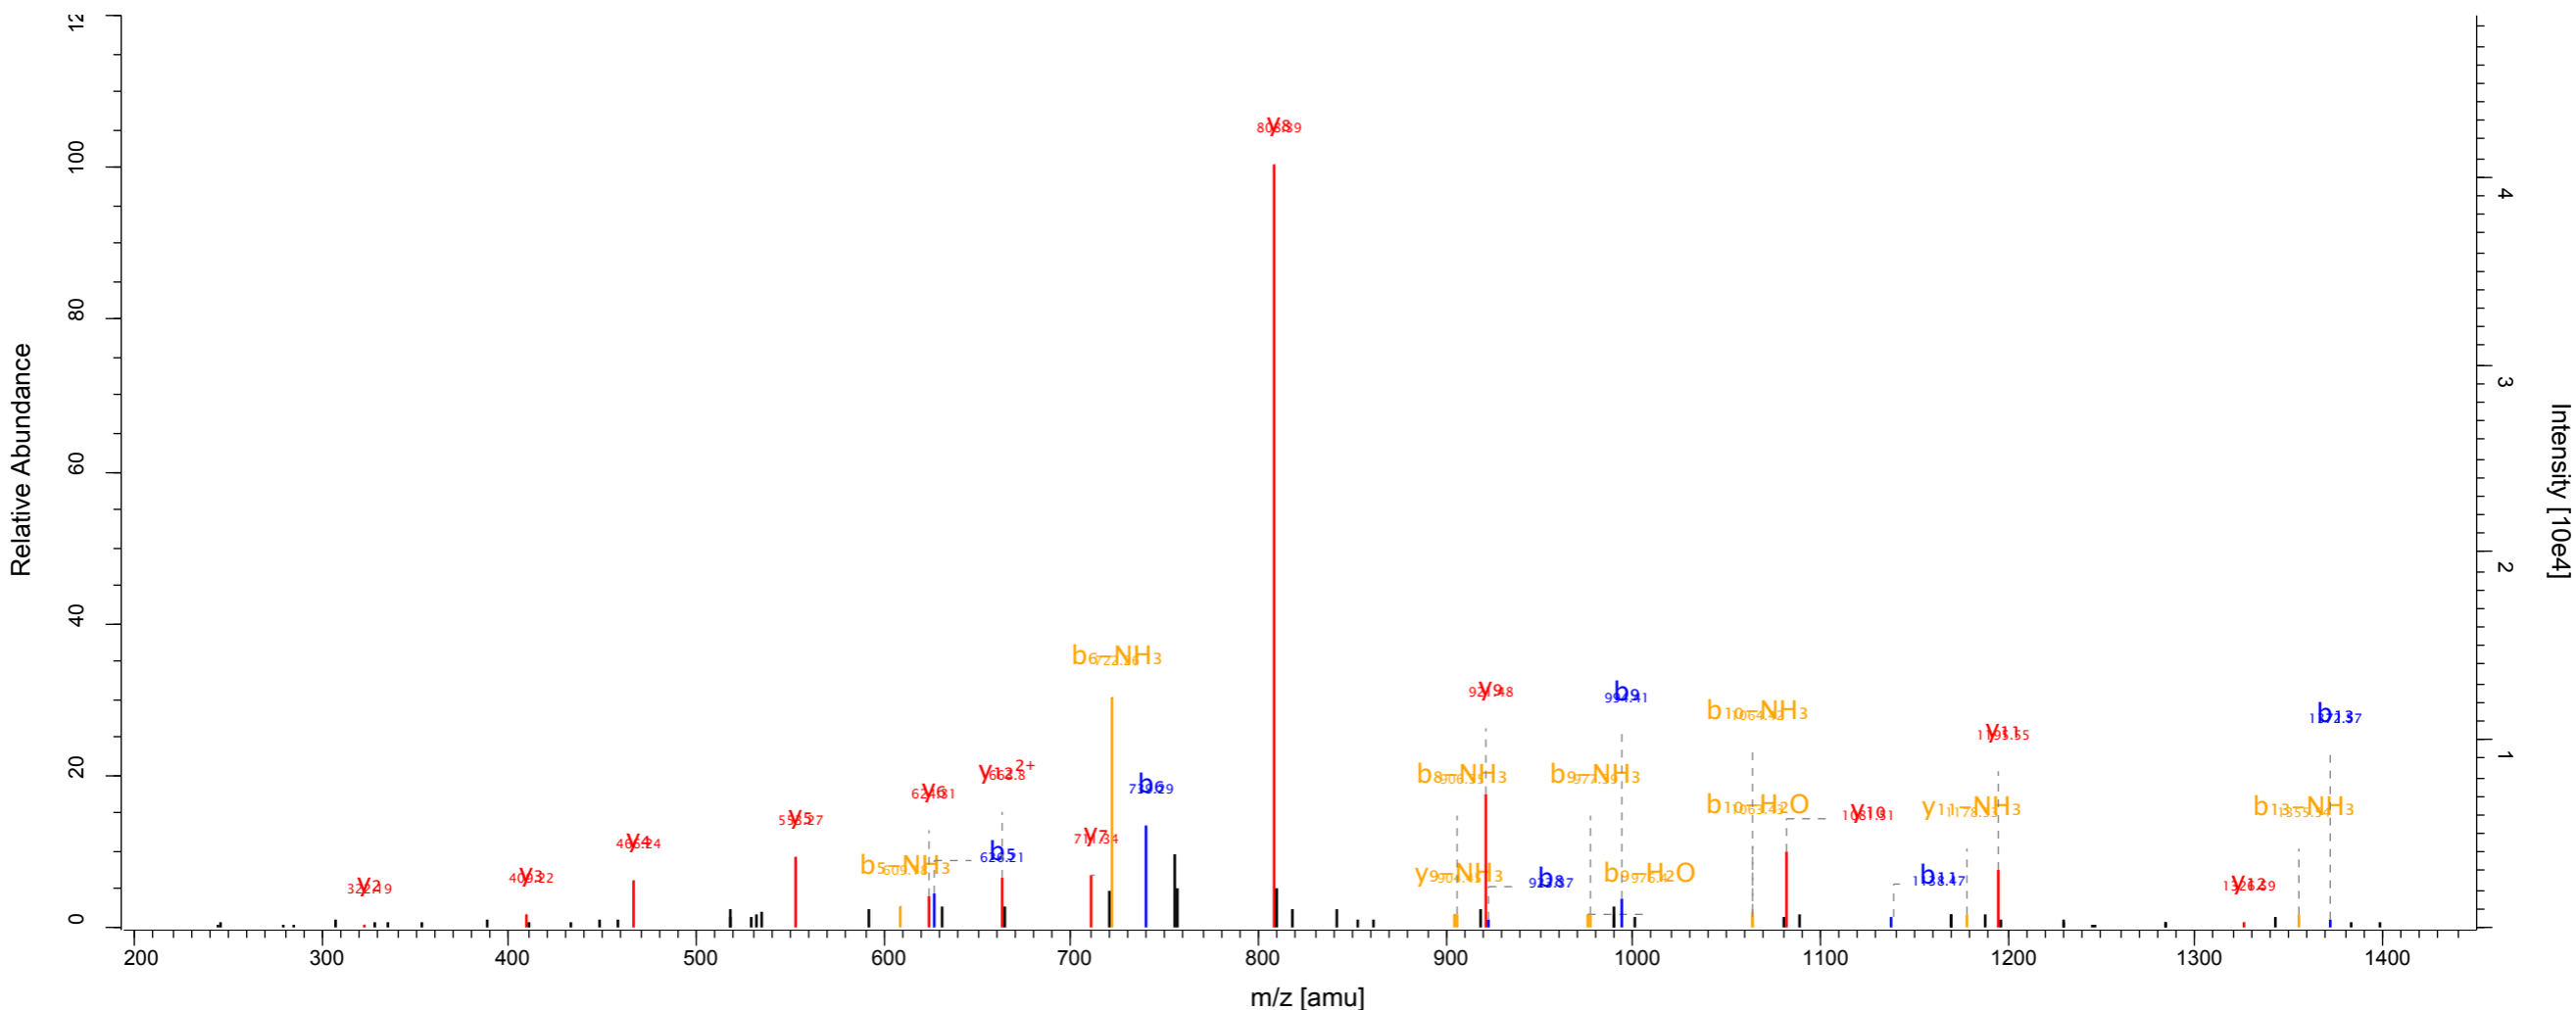

precursor information

|                   |                  |
|-------------------|------------------|
| Mass:             | 1545.67174       |
| m/z:              | 772.84215        |
| Charge:           | 2+               |
| Potentiation:     | 70.8282218115224 |
| Score:            | 175.7428         |
| Mass Error [ppm]: | 0.84658          |
| DEP:              | 8.61515_00       |
| Precursor Type:   | ISO              |

| b ion      |                |    |     |    | y ion          |            | y <sup>2+</sup> ion |            |
|------------|----------------|----|-----|----|----------------|------------|---------------------|------------|
| Δ dalton   | mass           |    | seq |    | Δ dalton       | mass       | Δ dalton            | mass       |
|            | 58.02874019    | 1  | G   | 13 |                |            |                     |            |
|            | 221.092068728  | 2  | Y   | 12 | 1489.656245464 |            | 1489.656245464      |            |
|            | 352.132553335  | 3  | M   | 11 | 1326.592916926 | +0.0729766 | 663.800096696       | -0.0881826 |
|            | 466.175480782  | 4  | N   | 10 | 1195.552432319 | -0.0220368 | 1195.552432319      |            |
| +0.1534291 | 626.206128983  | 5  | C   | 9  | 1081.509504872 | +0.0040449 | 1081.509504872      |            |
| -0.0320753 | 739.290192964  | 6  | I   | 8  | 921.478856671  | +0.0242561 | 921.478856671       |            |
|            | 836.342956816  | 7  | P   | 7  | 808.39479269   | +0.0089549 | 808.39479269        |            |
| +0.0807643 | 923.374985226  | 8  | S   | 6  | 711.342028838  | -0.1105225 | 711.342028838       |            |
| +0.0295514 | 994.412099013  | 9  | A   | 5  | 624.310000428  | +0.1045504 | 624.310000428       |            |
|            | 1081.444127423 | 10 | S   | 4  | 553.272886641  | +0.0276505 | 553.272886641       |            |
| -0.4281156 | 1138.465591147 | 11 | G   | 3  | 466.240858231  | +0.0414294 | 466.240858231       |            |
|            | 1225.497619557 | 12 | S   | 2  | 409.219394507  | +0.0744898 | 409.219394507       |            |
| +0.1715154 | 1372.566033473 | 13 | F   | 1  | 322.187366097  | +0.1117672 | 322.187366097       |            |
|            |                | 14 | R   | 0  | 175.118952181  |            | 175.118952181       |            |

general information

|                       |             |
|-----------------------|-------------|
| Annotation:           | 11 of 14    |
| AminoAcids Coverage:  | 70 %        |
| Intensity Coverage:   | 75 %        |
| Peak Coverage:        | 27 %        |
| Protein Localisation: | 376 ... 389 |

Scan number 17097 Raw file 20080924\_Orbi6\_SaZa\_SA\_ADH\_Matrigel\_12h\_Exp1\_InGel\_18  
 Method ITMS; CID Genenames RAD54L2

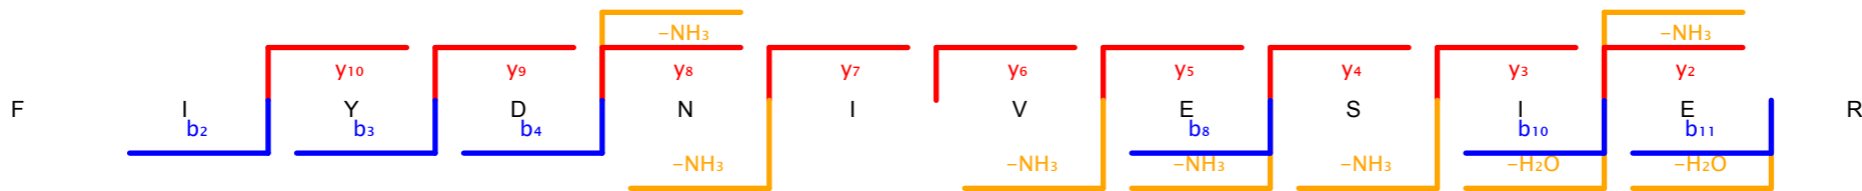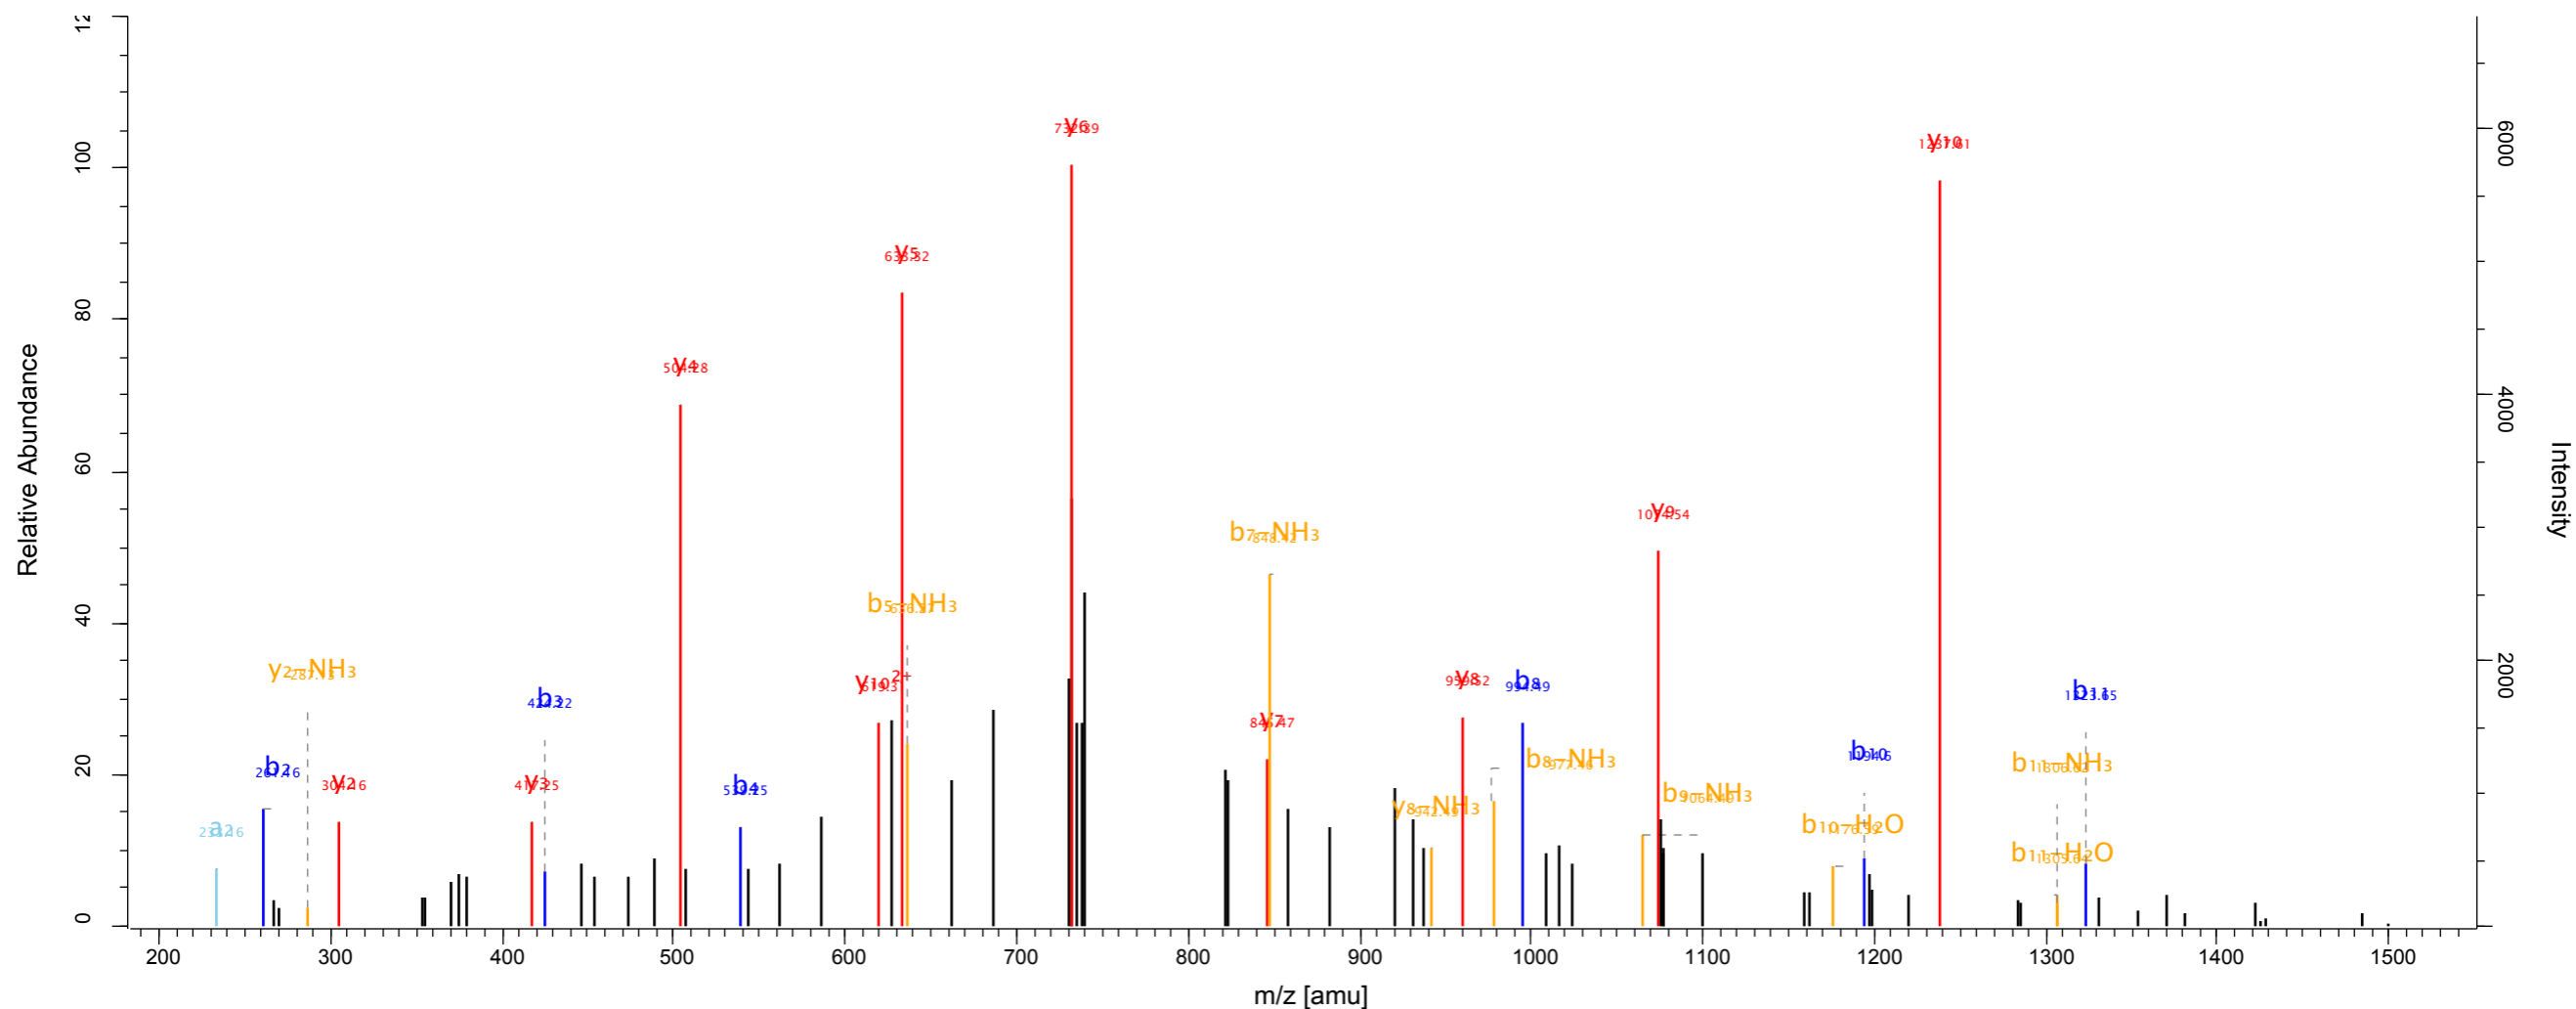

precursor information

|                   |                  |
|-------------------|------------------|
| Mass:             | 1406.75132       |
| m/z:              | 740.38204        |
| Charge:           | 2+               |
| Retention time:   | 105.782560885254 |
| Score:            | 171.6158         |
| Mass Error [ppm]: | 0.13025          |
| PEP:              | 1.51365e-06      |
| Precursor Type:   | ISO              |

general information

|                       |             |
|-----------------------|-------------|
| Annotation:           | 10 of 12    |
| AminoAcids Coverage:  | 82 %        |
| Intensity Coverage:   | 55 %        |
| Peak Coverage:        | 22 %        |
| Protein Localisation: | 281 ... 292 |

| a ion      |              | b ion      |              |    |     |    | y ion        |            | y <sup>2+</sup> ion |            |
|------------|--------------|------------|--------------|----|-----|----|--------------|------------|---------------------|------------|
| Δ dalton   | mass         | Δ dalton   | mass         |    | seq |    | Δ dalton     | mass       | Δ dalton            | mass       |
|            | 120.08077576 |            | 148.07569038 | 1  | F   | 11 |              |            |                     |            |
| +0.1022959 | 233.16483974 | -0.034205  | 261.15975436 | 2  | I   | 10 | 1350.6899717 |            | 1350.6899717        |            |
|            | 396.22816828 | +0.0766608 | 424.2230829  | 3  | Y   | 9  | 1237.6059077 | +0.0331304 | 619.30659207        | +0.0544309 |
|            | 511.25511131 | -0.0553848 | 539.25002593 | 4  | D   | 8  | 1074.5425791 | -0.0416026 | 1074.5425791        |            |
|            | 625.29803876 |            | 653.29295338 | 5  | N   | 7  | 959.51563611 | -0.0354115 | 959.51563611        |            |
|            | 738.38210274 |            | 766.37701736 | 6  | I   | 6  | 845.47270866 | +0.0858241 | 845.47270866        |            |
|            | 837.45051666 |            | 865.44543128 | 7  | V   | 5  | 732.38864468 | +0.0528226 | 732.38864468        |            |
|            | 966.49310975 | -0.1335932 | 994.48802437 | 8  | E   | 4  | 633.32023076 | +0.1136071 | 633.32023076        |            |
|            | 1053.5251382 |            | 1081.5200528 | 9  | S   | 3  | 504.27763767 | +0.0966299 | 504.27763767        |            |
|            | 1166.6092021 | -0.2481597 | 1194.6041168 | 10 | I   | 2  | 417.24560926 | +0.0953331 | 417.24560926        |            |
|            | 1295.6517952 | +0.0237003 | 1323.6467099 | 11 | E   | 1  | 304.16154528 | +0.105514  | 304.16154528        |            |
|            |              |            |              | 12 | R   | 0  | 175.11895218 |            | 175.11895218        |            |

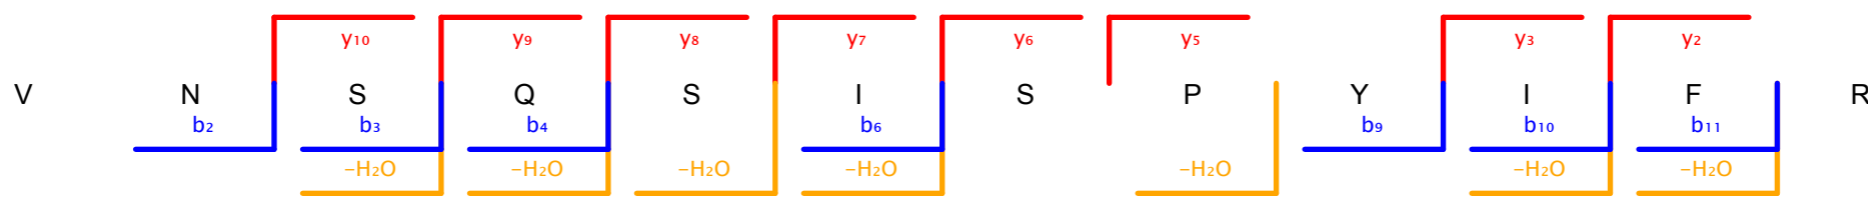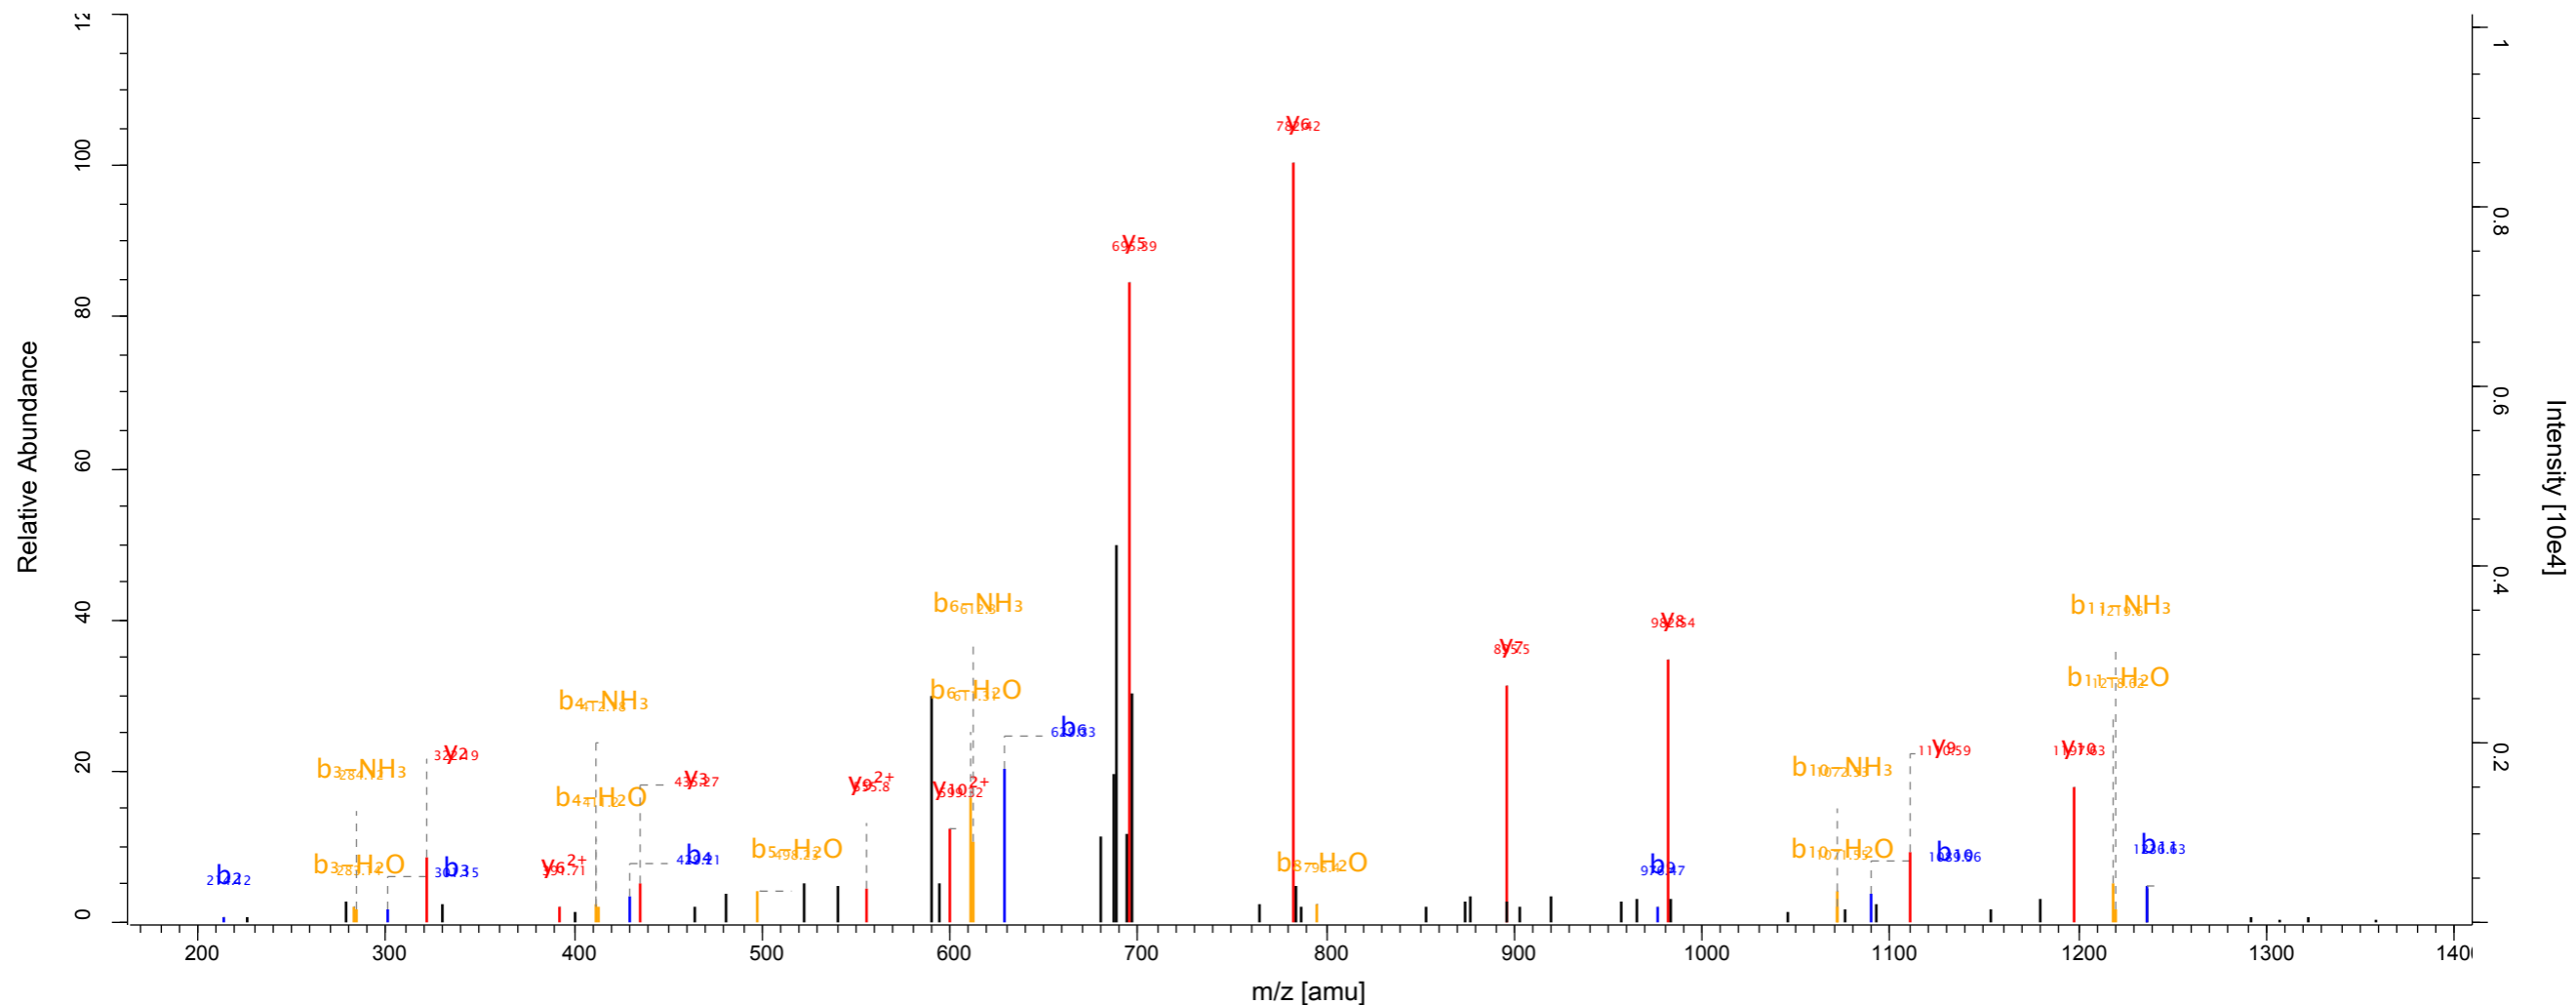

precursor information

|                   |                  |
|-------------------|------------------|
| Mass:             | 1400.72047       |
| m/z:              | 705.87251        |
| Charge:           | 2+               |
| Retentiontime:    | 80.8102520141602 |
| Score:            | 102.2827         |
| Mass Error [ppm]: | 0.10824          |
| PEP:              | 2.0276E-07       |
| Precursor Type:   | ISO              |

general information

|                       |           |
|-----------------------|-----------|
| Annotation:           | 10 of 12  |
| AminoAcids Coverage:  | 82 %      |
| Intensity Coverage:   | 62 %      |
| Peak Coverage:        | 45 %      |
| Protein Localisation: | 51 ... 62 |

| b ion      |                |    |     |    | y ion          |            | y <sup>2+</sup> ion |            |
|------------|----------------|----|-----|----|----------------|------------|---------------------|------------|
| Δ dalton   | mass           |    | seq |    | Δ dalton       | mass       | Δ dalton            | mass       |
|            | 100.075690383  | 1  | V   | 11 |                |            |                     |            |
| -0.1582754 | 214.11861783   | 2  | N   | 10 | 1311.669176637 |            | 1311.669176637      |            |
| +0.004261  | 301.15064624   | 3  | S   | 9  | 1197.626249189 | +0.0287801 | 599.316762828       | +0.0998631 |
| -0.006465  | 429.209223751  | 4  | Q   | 8  | 1110.59422078  | -0.1047188 | 555.800748623       | +0.1585409 |
|            | 516.241252161  | 5  | S   | 7  | 982.535643268  | -0.0363757 | 982.535643268       |            |
| +0.0050672 | 629.325316142  | 6  | I   | 6  | 895.503614858  | +0.114122  | 895.503614858       |            |
|            | 716.357344552  | 7  | S   | 5  | 782.419550878  | +0.0318041 | 391.713413672       | +0.4494892 |
|            | 813.410108404  | 8  | P   | 4  | 695.387522468  | +0.0774434 | 695.387522468       |            |
| +0.1344122 | 976.473436942  | 9  | Y   | 3  | 598.334758616  |            | 598.334758616       |            |
| -0.1140195 | 1089.557500922 | 10 | I   | 2  | 435.271430078  | -0.0707465 | 435.271430078       |            |
| +0.2161262 | 1236.625914838 | 11 | F   | 1  | 322.187366097  | +0.1120724 | 322.187366097       |            |
|            |                | 12 | R   | 0  | 175.118952181  |            | 175.118952181       |            |



Scan number 17789 Raw file 20080925\_Orbi6\_SaZa\_SA\_ADH\_Laminin\_24h\_Exp1\_InGel\_01  
 Method ITMS; CID Genenames FAM165B

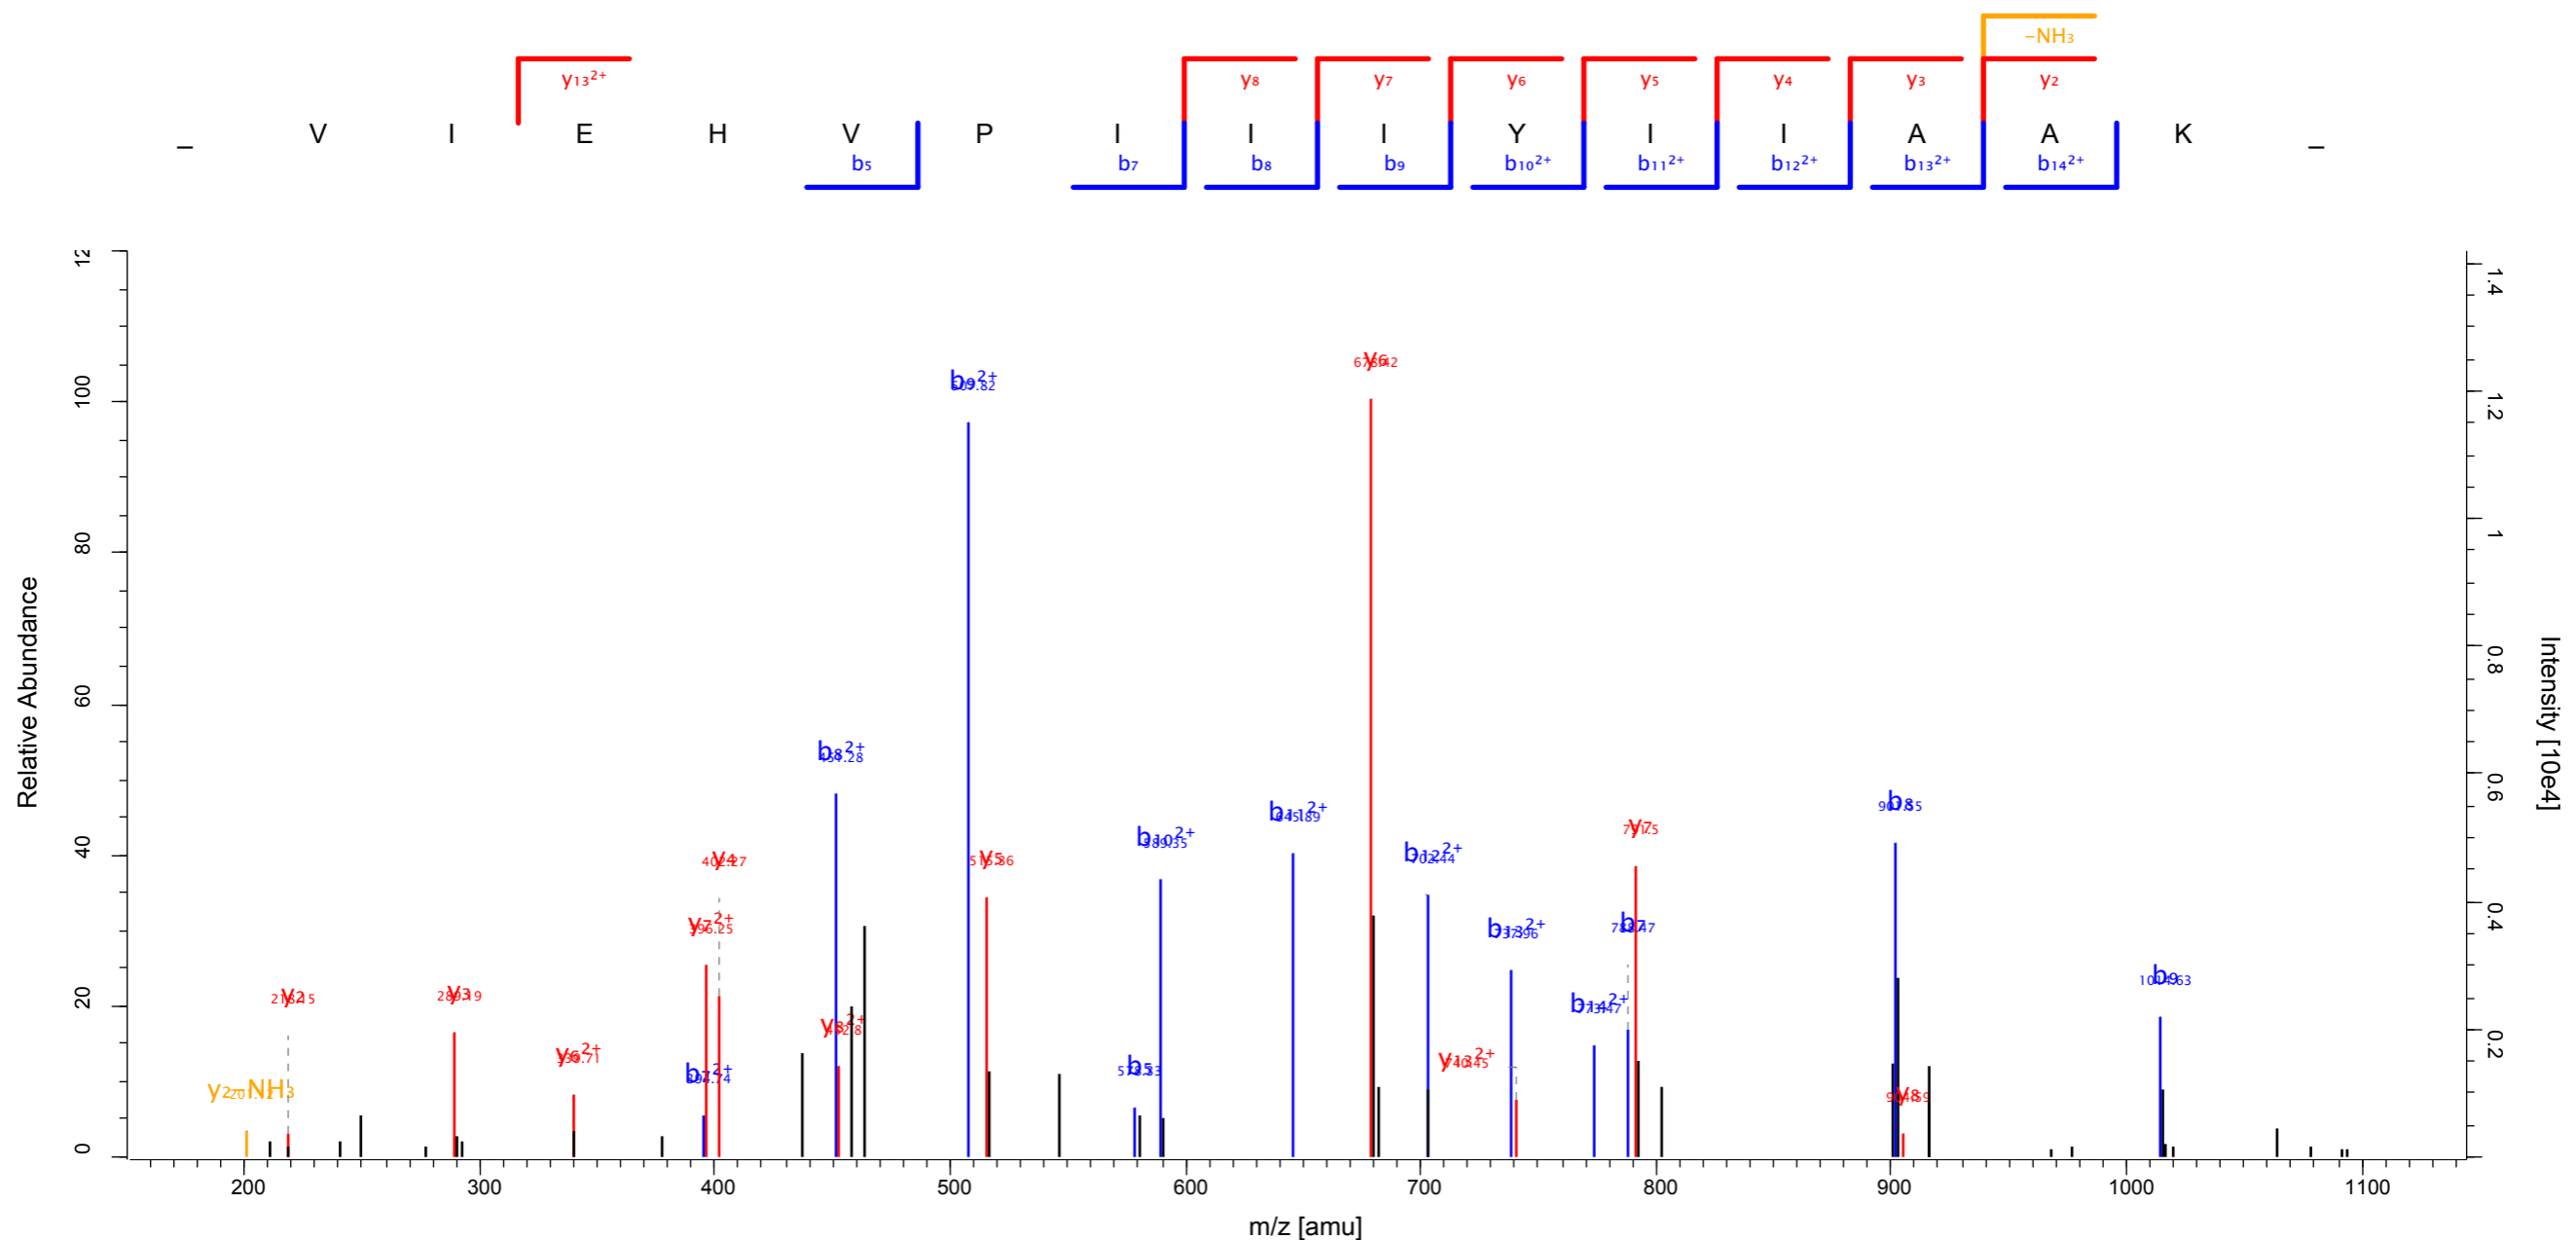

#### precursor information

|                   |                  |
|-------------------|------------------|
| Mass:             | 1128.56612       |
| m/z:              | 565.20024        |
| Charge:           | 2+               |
| Potenttime:       | 114.001861572266 |
| Score:            | 146.256          |
| Mass Error [ppm]: | -0.028085        |
| DEP:              | 8.47555E-24      |
| Precursor Type:   | ISO              |

#### general information

|                       |          |
|-----------------------|----------|
| Annotation:           | 10 of 15 |
| AminoAcids Coverage:  | 67%      |
| Intensity Coverage:   | 71%      |
| Peak Coverage:        | 41%      |
| Protein Localisation: | 5 ... 19 |

| b <sup>2+</sup> ion |              | b ion      |              |    |     |    | y ion        |            | y <sup>2+</sup> ion |            |
|---------------------|--------------|------------|--------------|----|-----|----|--------------|------------|---------------------|------------|
| Δ dalton            | mass         | Δ dalton   | mass         |    | seq |    | Δ dalton     | mass       | Δ dalton            | mass       |
|                     | 100.07569038 |            | 100.07569038 | 1  | V   | 14 |              |            |                     |            |
|                     | 213.15975436 |            | 213.15975436 | 2  | I   | 13 | 1592.9774269 |            | 1592.9774269        |            |
|                     | 342.20234746 |            | 342.20234746 | 3  | E   | 12 | 1479.8933629 |            | 740.45031969        | +0.252317  |
|                     | 479.26125932 |            | 479.26125932 | 4  | H   | 11 | 1350.8507698 |            | 1350.8507698        |            |
|                     | 578.32967324 | +0.0718771 | 578.32967324 | 5  | V   | 10 | 1213.791858  |            | 1213.791858         |            |
|                     | 675.38243709 |            | 675.38243709 | 6  | P   | 9  | 1114.723444  |            | 1114.723444         |            |
| -0.0382804          | 394.73688877 | +0.0602934 | 788.46650107 | 7  | I   | 8  | 1017.6706802 |            | 1017.6706802        |            |
| +0.3010353          | 451.27892076 | +0.0729701 | 901.55056505 | 8  | I   | 7  | 904.58661621 | +0.0850147 | 452.79694634        | +0.1605732 |
| +0.1291815          | 507.82095275 | -0.0731056 | 1014.634629  | 9  | I   | 6  | 791.50255223 | -0.0601084 | 396.25491435        | +0.1999196 |
| +0.1444533          | 589.35261702 |            | 1177.6979576 | 10 | Y   | 5  | 678.41848825 | +0.0439141 | 339.71288236        | +0.0548789 |
| +0.1588788          | 645.89464901 |            | 1290.7820215 | 11 | I   | 4  | 515.35515971 | +0.061039  | 515.35515971        |            |
| +0.1372936          | 702.436681   |            | 1403.8660855 | 12 | I   | 3  | 402.27109573 | -0.0416035 | 402.27109573        |            |
| +0.0501942          | 737.95523789 |            | 1474.9031993 | 13 | A   | 2  | 289.18703175 | +0.0657148 | 289.18703175        |            |
| +0.1192838          | 773.47379479 |            | 1545.9403131 | 14 | A   | 1  | 218.14991796 | +0.0686489 | 218.14991796        |            |
|                     |              |            |              | 15 | K   | 0  | 147.11280417 |            | 147.11280417        |            |

Scan number 16573 Raw file 20080925\_Orbi6\_SaZa\_SA\_ADH\_Laminin\_24h\_Exp1\_InGel\_04  
 Method ITMS; CID Genenames FAM173A

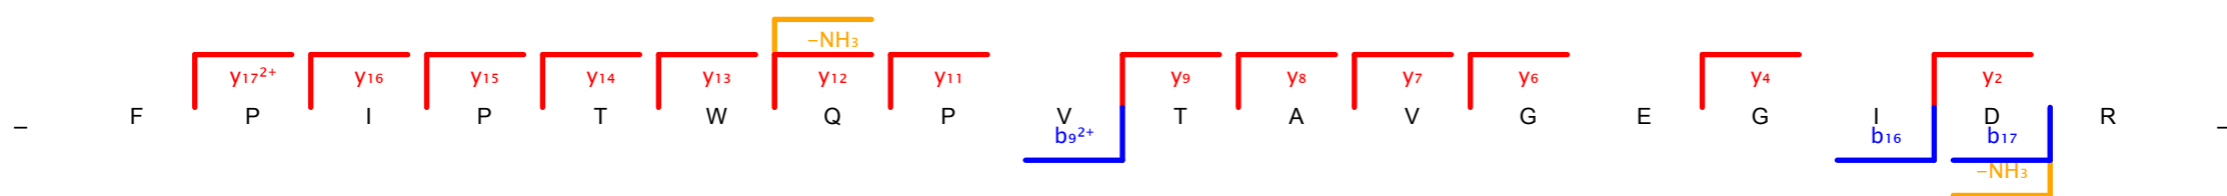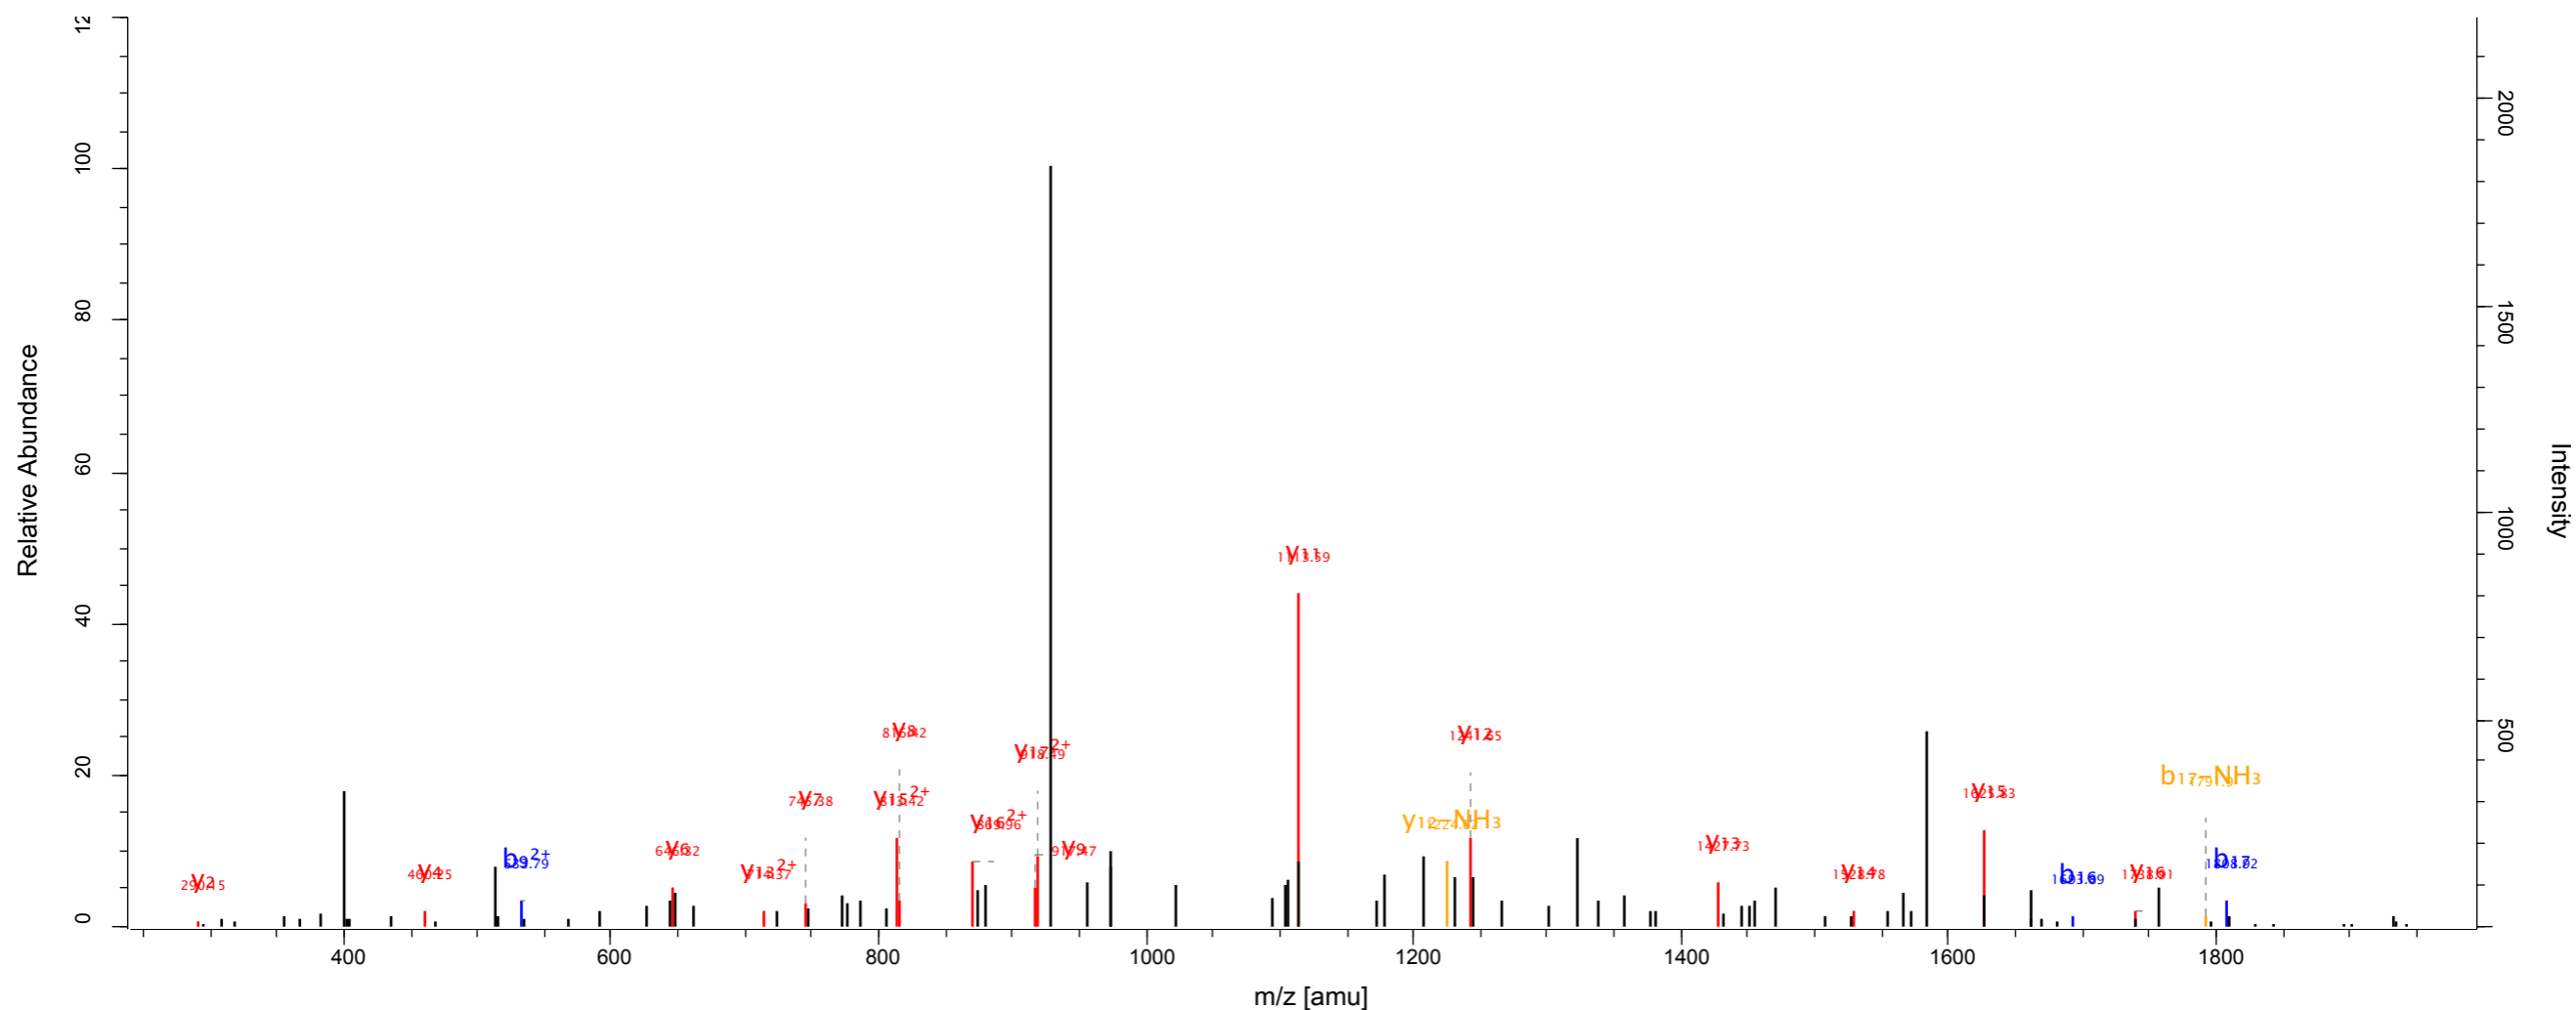

precursor information

|                   |                  |
|-------------------|------------------|
| Mass:             | 1082.02580       |
| m/z:              | 902.02022        |
| Charge:           | 2+               |
| Potenttime:       | 106.256501706875 |
| Score:            | 112.5004         |
| Mass Error (ppm): | 0.12522          |
| DEP:              | 0.00016426       |
| Precursor Type:   | ISO              |

| b <sup>2+</sup> ion |              | b ion      |              |    |     |    | y ion        |            | y <sup>2+</sup> ion |            |
|---------------------|--------------|------------|--------------|----|-----|----|--------------|------------|---------------------|------------|
| Δ dalton            | mass         | Δ dalton   | mass         |    | seq |    | Δ dalton     | mass       | Δ dalton            | mass       |
|                     | 148.07569038 |            | 148.07569038 | 1  | F   | 17 |              |            |                     |            |
|                     | 245.12845423 |            | 245.12845423 | 2  | P   | 16 | 1835.9650243 |            | 918.48615039        | +0.4899238 |
|                     | 358.21251822 |            | 358.21251822 | 3  | I   | 15 | 1738.9122605 | +0.0005813 | 869.95976846        | -0.037161  |
|                     | 455.26528207 |            | 455.26528207 | 4  | P   | 14 | 1625.8281965 | -0.0637922 | 813.41773647        | +0.0762821 |
|                     | 556.31296054 |            | 556.31296054 | 5  | T   | 13 | 1528.7754326 | -0.1689873 | 1528.7754326        |            |
|                     | 742.39227349 |            | 742.39227349 | 6  | W   | 12 | 1427.7277541 | -0.1047073 | 714.36751531        | +0.1346209 |
|                     | 870.45085101 |            | 870.45085101 | 7  | Q   | 11 | 1241.6484412 | +0.0743371 | 1241.6484412        |            |
|                     | 967.50361486 |            | 967.50361486 | 8  | P   | 10 | 1113.5898637 | -0.0429887 | 1113.5898637        |            |
| -0.4026897          | 533.78965262 |            | 1066.5720288 | 9  | V   | 9  | 1016.5370998 |            | 1016.5370998        |            |
|                     | 1167.6197072 |            | 1167.6197072 | 10 | T   | 8  | 917.46868591 | +0.208194  | 917.46868591        |            |
|                     | 1238.656821  |            | 1238.656821  | 11 | A   | 7  | 816.42100744 | +0.0280892 | 816.42100744        |            |
|                     | 1337.725235  |            | 1337.725235  | 12 | V   | 6  | 745.38389365 | +0.1262992 | 745.38389365        |            |
|                     | 1394.7466987 |            | 1394.7466987 | 13 | G   | 5  | 646.31547974 | +0.1295886 | 646.31547974        |            |
|                     | 1523.7892918 |            | 1523.7892918 | 14 | E   | 4  | 589.29401601 |            | 589.29401601        |            |
|                     | 1580.8107555 |            | 1580.8107555 | 15 | G   | 3  | 460.25142292 | +0.2514152 | 460.25142292        |            |
|                     | 1693.8948195 | -0.2150099 | 1693.8948195 | 16 | I   | 2  | 403.22995919 |            | 403.22995919        |            |
|                     | 1808.9217625 | -0.1228123 | 1808.9217625 | 17 | D   | 1  | 290.14589521 | +0.1645601 | 290.14589521        |            |
|                     |              |            |              | 18 | R   | 0  | 175.11895218 |            | 175.11895218        |            |

general information

|                       |             |
|-----------------------|-------------|
| Annotation:           | 15 of 18    |
| AminoAcids Coverage:  | 82%         |
| Intensity Coverage:   | 28%         |
| Peak Coverage:        | 22%         |
| Protein Localisation: | 176 ... 193 |

Scan number 16781 Raw file 20080925\_Orbi6\_SaZa\_SA\_ADH\_Laminin\_24h\_Exp1\_InGel\_06  
 Method ITMS; CID Genenames TM2D1

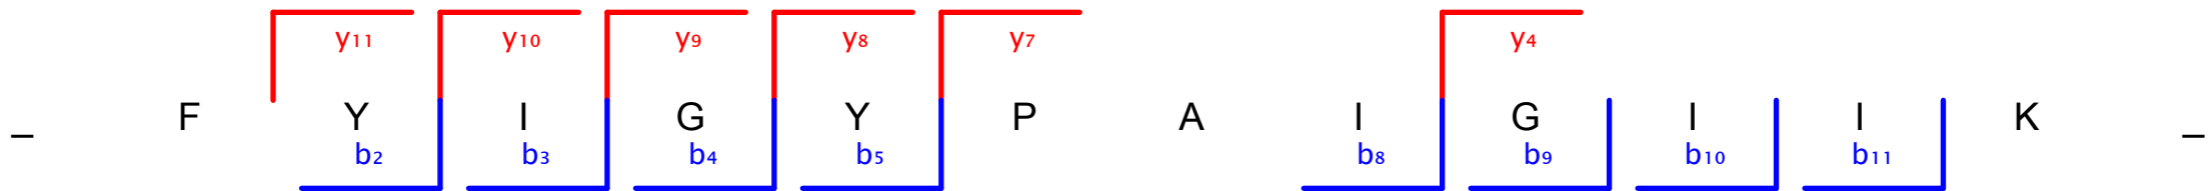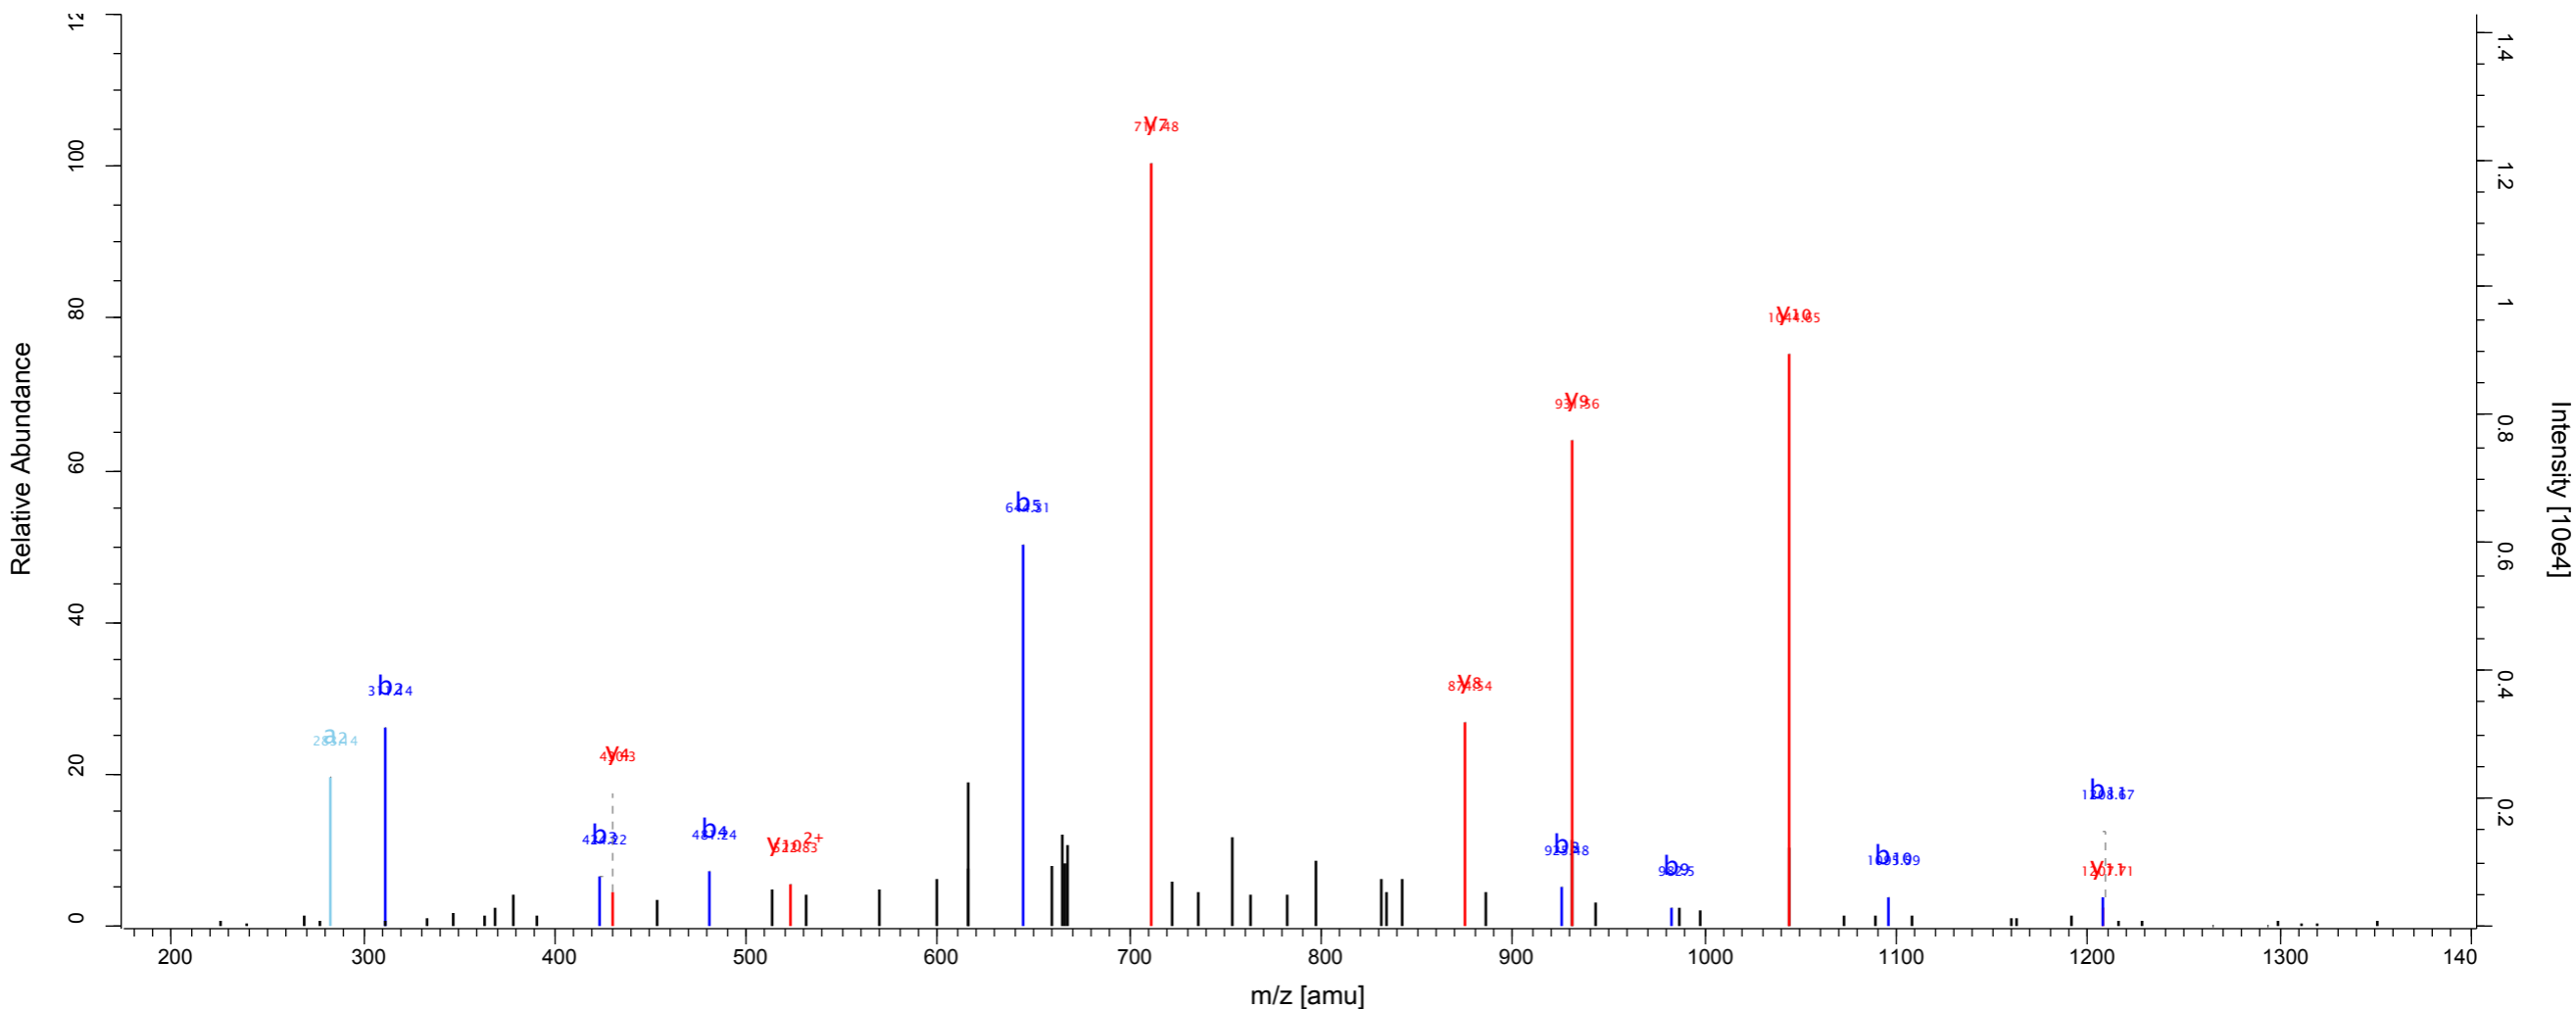

precursor information

|                   |                  |
|-------------------|------------------|
| Mass:             | 1252.76076       |
| m/z:              | 677.80216        |
| Charge:           | 2+               |
| Retentiontime:    | 107.536735534668 |
| Score:            | 150.8537         |
| Mass Error [ppm]: | 0.07716          |
| PEP:              | 1.1105E-05       |
| Precursor Type:   | MULTI            |

general information

|                       |             |
|-----------------------|-------------|
| Annotation:           | 0 of 12     |
| AminoAcids Coverage:  | 75 %        |
| Intensity Coverage:   | 66 %        |
| Peak Coverage:        | 24 %        |
| Protein Localisation: | 139 ... 150 |

| a ion      |              | b ion      |              |    |     |    | y ion        |            | y <sup>2+</sup> ion |            |
|------------|--------------|------------|--------------|----|-----|----|--------------|------------|---------------------|------------|
| Δ dalton   | mass         | Δ dalton   | mass         |    | seq |    | Δ dalton     | mass       | Δ dalton            | mass       |
|            | 120.08077576 |            | 148.07569038 | 1  | F   | 11 |              |            |                     |            |
| +0.0134274 | 283.1441043  | +0.043171  | 311.13901892 | 2  | Y   | 10 | 1207.7085223 | -0.1314959 | 1207.7085223        |            |
|            | 396.22816828 | -0.1488031 | 424.2230829  | 3  | I   | 9  | 1044.6451937 | -0.0005404 | 522.82623509        | +0.0848977 |
|            | 453.249632   | +0.0312712 | 481.24454663 | 4  | G   | 8  | 931.56112974 | +0.0043    | 931.56112974        |            |
|            | 616.31296054 | -0.0689225 | 644.30787516 | 5  | Y   | 7  | 874.53966601 | -0.0803765 | 874.53966601        |            |
|            | 713.36572439 |            | 741.36063902 | 6  | P   | 6  | 711.47633748 | +0.0004081 | 711.47633748        |            |
|            | 784.40283818 |            | 812.3977528  | 7  | A   | 5  | 614.42357362 |            | 614.42357362        |            |
|            | 897.48690216 | -0.2151542 | 925.48181678 | 8  | I   | 4  | 543.38645984 |            | 543.38645984        |            |
|            | 954.50836589 | +0.0556184 | 982.50328051 | 9  | G   | 3  | 430.30239586 | +0.0787687 | 430.30239586        |            |
|            | 1067.5924299 | -0.0820955 | 1095.5873445 | 10 | I   | 2  | 373.28093213 |            | 373.28093213        |            |
|            | 1180.6764938 | -0.2223118 | 1208.6714085 | 11 | I   | 1  | 260.19686815 |            | 260.19686815        |            |
|            |              |            |              | 12 | K   | 0  | 147.11280417 |            | 147.11280417        |            |

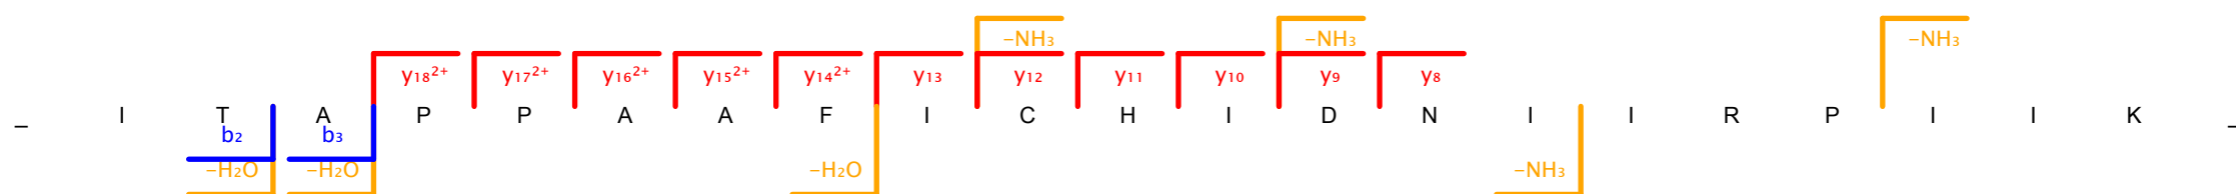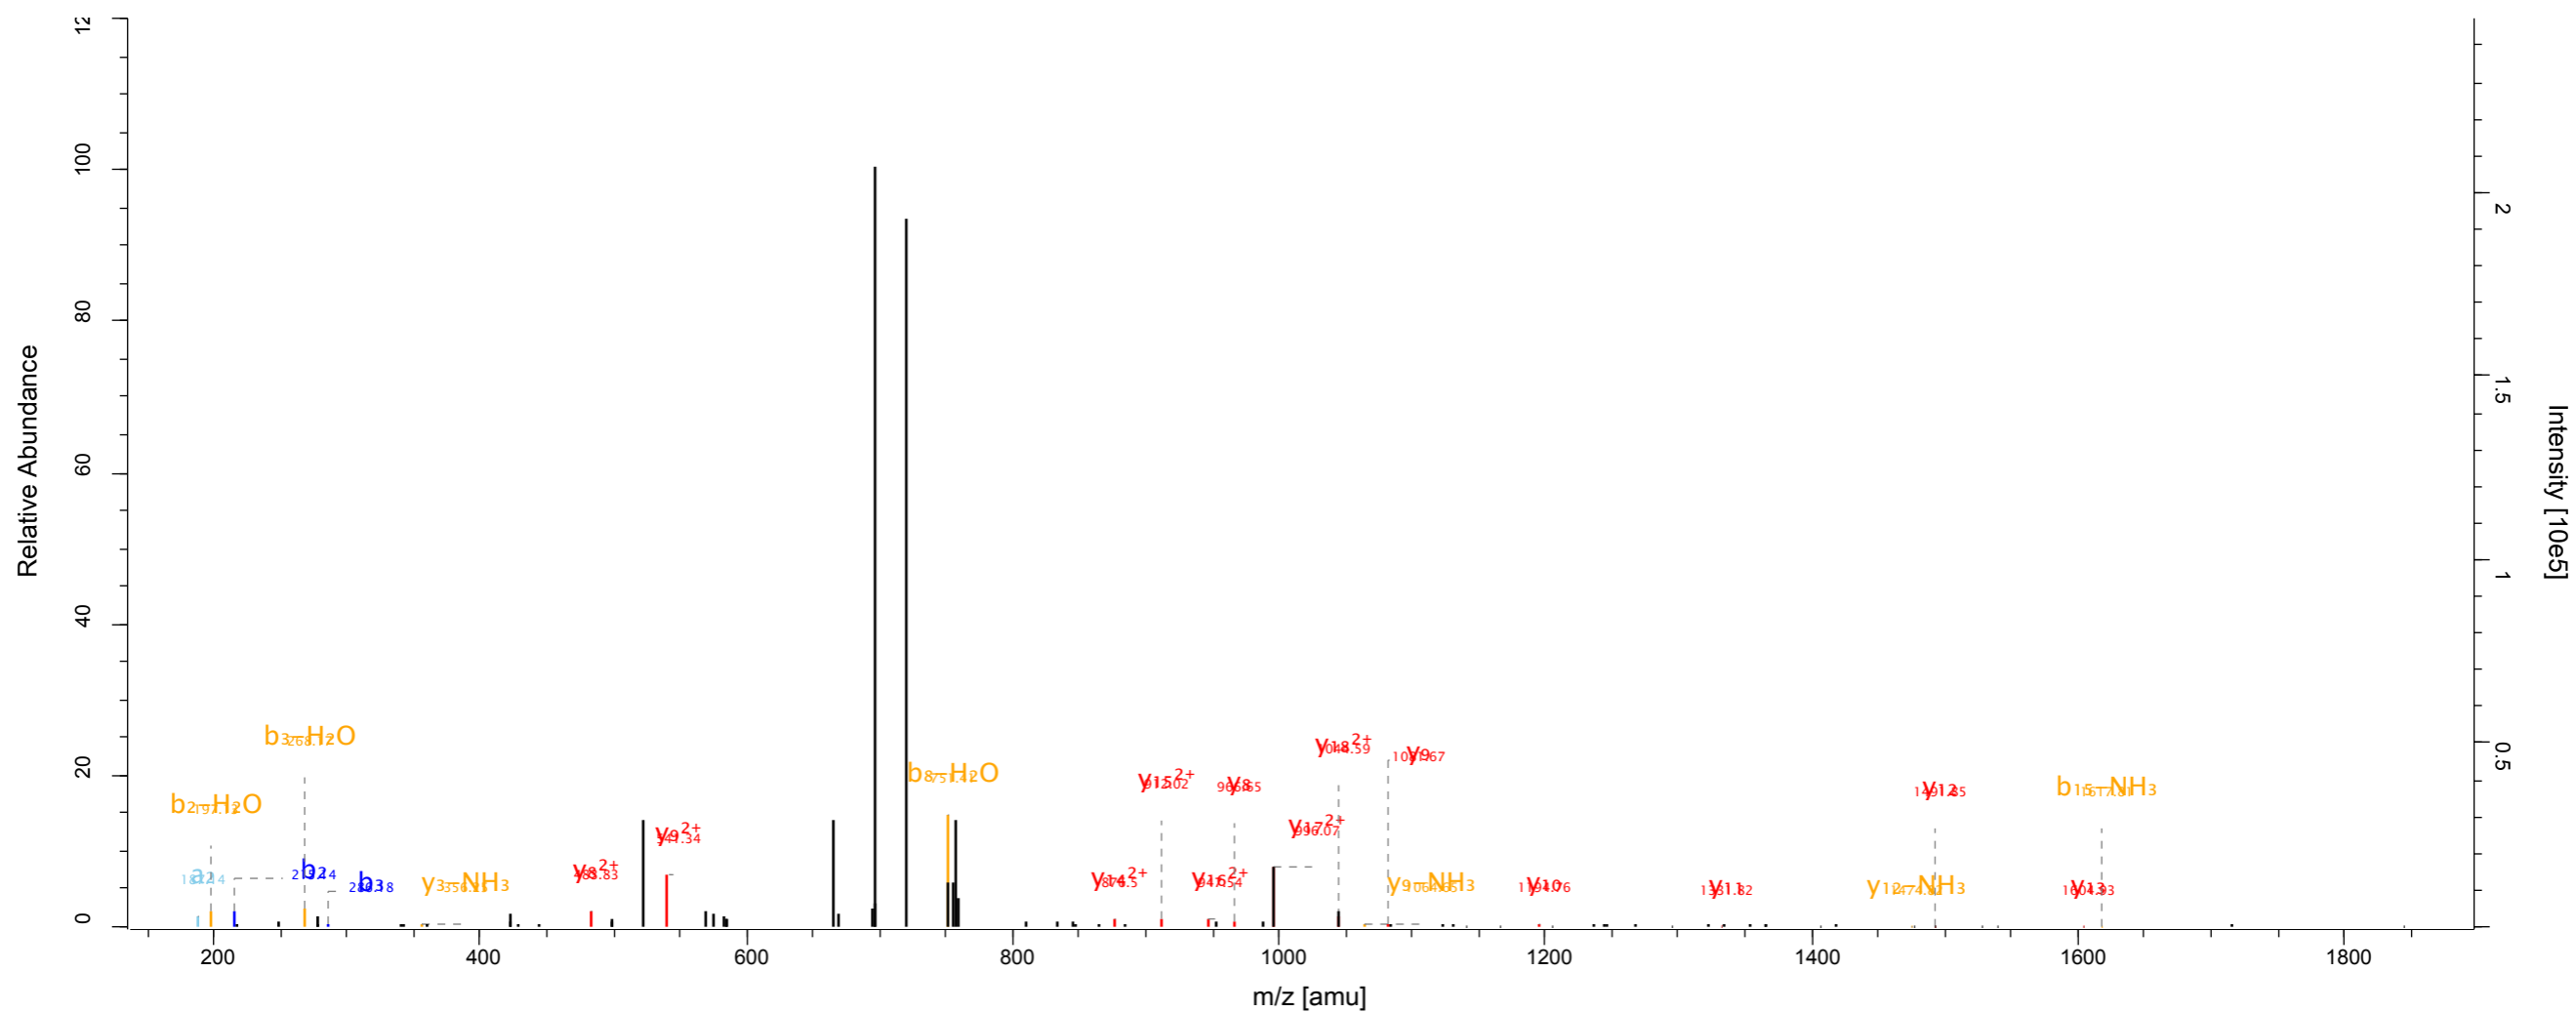

precursor information

|                   |                  |
|-------------------|------------------|
| Mass:             | 2272.22045       |
| m/z:              | 504.00214        |
| Charge:           | 4                |
| Potenttime:       | 115.267211006101 |
| Score:            | 70.82656         |
| Mass Error [ppm]: | -0.23546         |
| DEP:              | 8.76845_05       |
| Precursor Type:   | MULTI            |

| a ion     |              | b ion      |              |    |     |    | y ion        |            | y <sup>2+</sup> ion |            |
|-----------|--------------|------------|--------------|----|-----|----|--------------|------------|---------------------|------------|
| Δ dalton  | mass         | Δ dalton   | mass         |    | seq |    | Δ dalton     | mass       | Δ dalton            | mass       |
|           | 86.096425825 |            | 114.09134045 | 1  | I   | 20 |              |            |                     |            |
| -0.015961 | 187.1441043  | -0.0891685 | 215.13901892 | 2  | T   | 19 | 2260.2634549 |            | 2260.2634549        |            |
|           | 258.18121809 | -0.3161168 | 286.17613271 | 3  | A   | 18 | 2159.2157765 |            | 2159.2157765        |            |
|           | 355.23398194 |            | 383.22889656 | 4  | P   | 17 | 2088.1786627 |            | 1044.5929696        | +0.005175  |
|           | 452.28674579 |            | 480.28166041 | 5  | P   | 16 | 1991.1258988 |            | 996.06658764        | -0.0368025 |
|           | 523.32385958 |            | 551.3187742  | 6  | A   | 15 | 1894.073135  |            | 947.54020572        | +0.3182538 |
|           | 594.36097337 |            | 622.35588799 | 7  | A   | 14 | 1823.0360212 |            | 912.02164882        | +0.0069156 |
|           | 741.42938728 |            | 769.4243019  | 8  | F   | 13 | 1751.9989074 |            | 876.50309193        | +0.2595423 |
|           | 854.51345126 |            | 882.50836589 | 9  | I   | 12 | 1604.9304935 | -0.0396243 | 1604.9304935        |            |
|           | 1014.5440995 |            | 1042.5390141 | 10 | C   | 11 | 1491.8464295 | +0.0317443 | 1491.8464295        |            |
|           | 1151.6030113 |            | 1179.5979259 | 11 | H   | 10 | 1331.8157813 | -0.0925147 | 1331.8157813        |            |
|           | 1264.6870753 |            | 1292.6819899 | 12 | I   | 9  | 1194.7568694 | -0.2037688 | 1194.7568694        |            |
|           | 1379.7140183 |            | 1407.708933  | 13 | D   | 8  | 1081.6728055 | +0.027634  | 541.34004096        | -0.4534443 |
|           | 1493.7569458 |            | 1521.7518604 | 14 | N   | 7  | 966.64586242 | -0.1672858 | 483.82656944        | +0.1974784 |
|           | 1606.8410098 |            | 1634.8359244 | 15 | I   | 6  | 852.60293497 |            | 852.60293497        |            |
|           | 1719.9250737 |            | 1747.9199884 | 16 | I   | 5  | 739.51887099 |            | 739.51887099        |            |
|           | 1876.0261848 |            | 1904.0210994 | 17 | R   | 4  | 626.43480701 |            | 626.43480701        |            |
|           | 1973.0789486 |            | 2001.0738632 | 18 | P   | 3  | 470.33369598 |            | 470.33369598        |            |
|           | 2086.1630126 |            | 2114.1579272 | 19 | I   | 2  | 373.28093213 |            | 373.28093213        |            |
|           | 2199.2470766 |            | 2227.2419912 | 20 | I   | 1  | 260.19686815 |            | 260.19686815        |            |
|           |              |            |              | 21 | K   | 0  | 147.11280417 |            | 147.11280417        |            |

general information

|                       |           |
|-----------------------|-----------|
| Annotation:           | 15 of 21  |
| AminoAcids Coverage:  | 71%       |
| Intensity Coverage:   | 14%       |
| Peak Coverage:        | 27%       |
| Protein Localisation: | 65 ... 85 |

Scan number 10038 Raw file 20081002\_Orbi5\_SaZa\_SA\_ADH\_Laminin\_24h\_Exp\_2\_InGel\_01  
 Method ITMS; CID Genenames CSTA

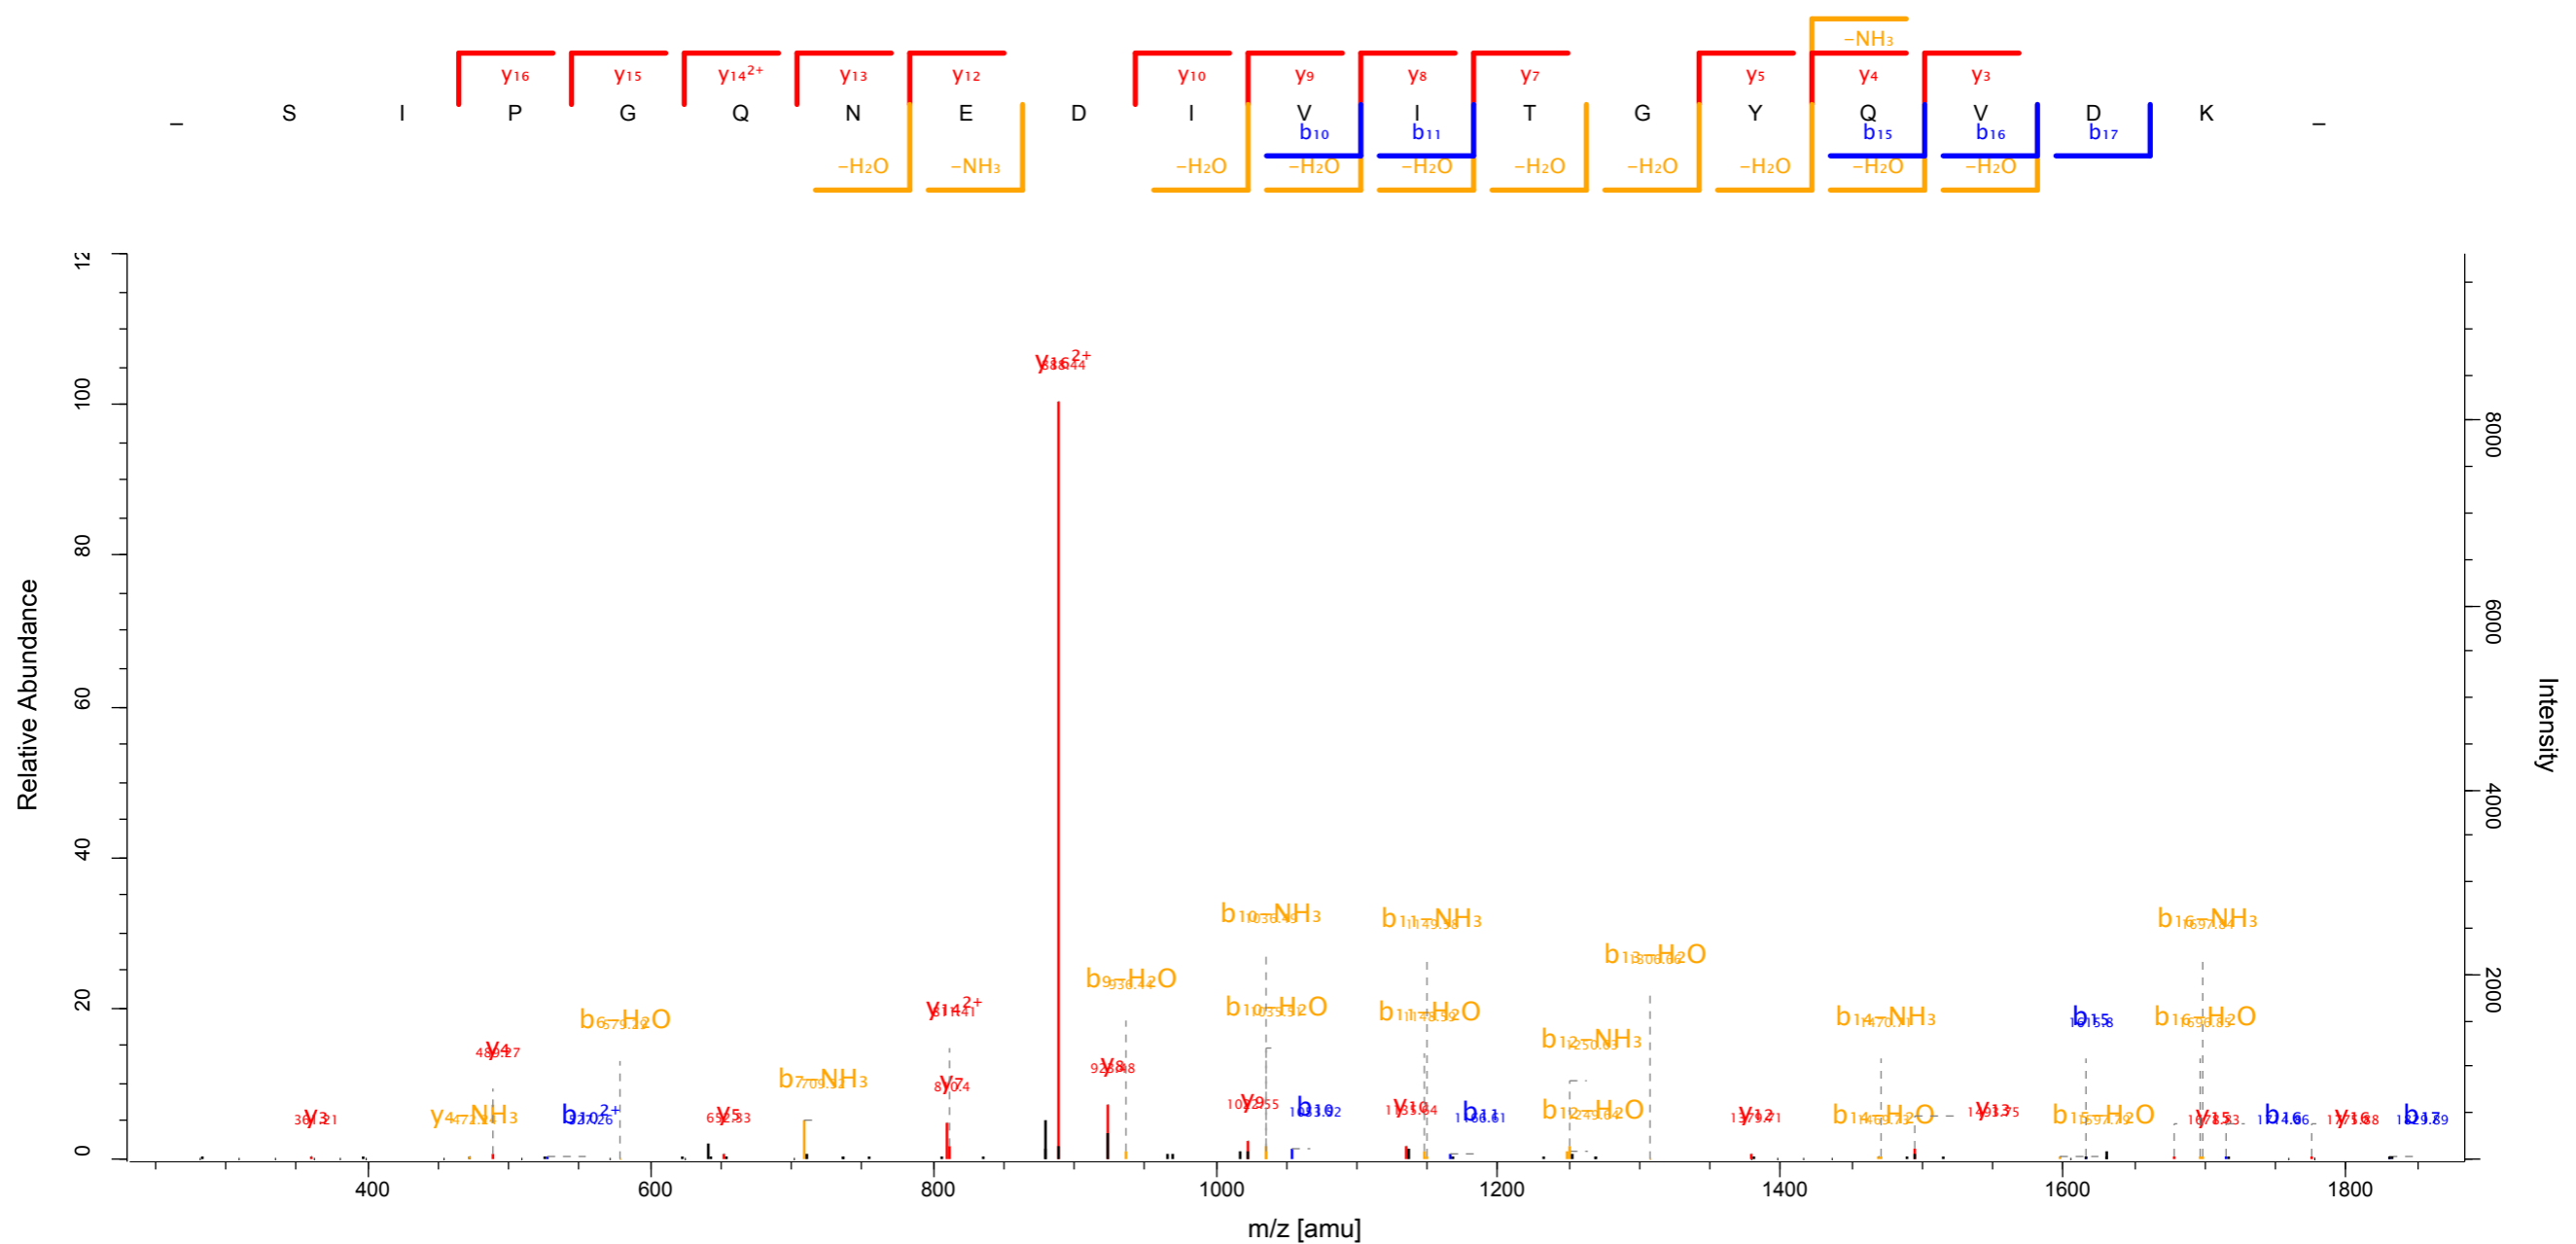

precursor information

|                   |                 |
|-------------------|-----------------|
| Mass:             | 1074.08888      |
| m/z:              | 88.50171        |
| Charge:           | 2+              |
| Potenttime:       | 77.242268422617 |
| Score:            | 162.2028        |
| Mass Error (ppm): | 0.48562         |
| DEP:              | 0.78775_00      |
| Precursor Type:   | ISO             |

general information

|                       |           |
|-----------------------|-----------|
| Annotation:           | 15 of 18  |
| AminoAcids Coverage:  | 82%       |
| Intensity Coverage:   | 82%       |
| Peak Coverage:        | 28%       |
| Protein Localisation: | 72 ... 89 |

| b <sup>2+</sup> ion |              | b ion      |              |    |     |    | y ion        |            | y <sup>2+</sup> ion |            |
|---------------------|--------------|------------|--------------|----|-----|----|--------------|------------|---------------------|------------|
| Δ dalton            | mass         | Δ dalton   | mass         |    | seq |    | Δ dalton     | mass       | Δ dalton            | mass       |
|                     | 88.039304876 |            | 88.039304876 | 1  | S   | 17 |              |            |                     |            |
|                     | 201.12336886 |            | 201.12336886 | 2  | I   | 16 | 1888.9650839 |            | 1888.9650839        |            |
|                     | 298.17613271 |            | 298.17613271 | 3  | P   | 15 | 1775.8810199 | +0.1099469 | 888.44414819        | +0.2233323 |
|                     | 355.19759643 |            | 355.19759643 | 4  | G   | 14 | 1678.8282561 | -0.2224211 | 1678.8282561        |            |
|                     | 483.25617394 |            | 483.25617394 | 5  | Q   | 13 | 1621.8067923 |            | 811.4070344         | -0.0422883 |
|                     | 597.29910139 |            | 597.29910139 | 6  | N   | 12 | 1493.7482148 | -0.0782929 | 1493.7482148        |            |
|                     | 726.34169449 |            | 726.34169449 | 7  | E   | 11 | 1379.7052874 | -0.178676  | 1379.7052874        |            |
|                     | 841.36863752 |            | 841.36863752 | 8  | D   | 10 | 1250.6626943 |            | 1250.6626943        |            |
|                     | 954.4527015  |            | 954.4527015  | 9  | I   | 9  | 1135.6357512 | -0.1375823 | 1135.6357512        |            |
| +0.0807748          | 527.26419594 | -0.1226779 | 1053.5211154 | 10 | V   | 8  | 1022.5516873 | -0.113699  | 1022.5516873        |            |
|                     | 1166.6051794 | -0.1840368 | 1166.6051794 | 11 | I   | 7  | 923.48327335 | -0.1400116 | 923.48327335        |            |
|                     | 1267.6528579 |            | 1267.6528579 | 12 | T   | 6  | 810.39920937 | -0.0048002 | 810.39920937        |            |
|                     | 1324.6743216 |            | 1324.6743216 | 13 | G   | 5  | 709.35153089 |            | 709.35153089        |            |
|                     | 1487.7376501 |            | 1487.7376501 | 14 | Y   | 4  | 652.33006717 | +0.0931506 | 652.33006717        |            |
|                     | 1615.7962276 | -0.2348263 | 1615.7962276 | 15 | Q   | 3  | 489.26673863 | +0.0087435 | 489.26673863        |            |
|                     | 1714.8646416 | -0.0793632 | 1714.8646416 | 16 | V   | 2  | 361.20816112 | +0.0334465 | 361.20816112        |            |
|                     | 1829.8915846 | -0.176985  | 1829.8915846 | 17 | D   | 1  | 262.1397472  |            | 262.1397472         |            |
|                     |              |            |              | 18 | K   | 0  | 147.11280417 |            | 147.11280417        |            |

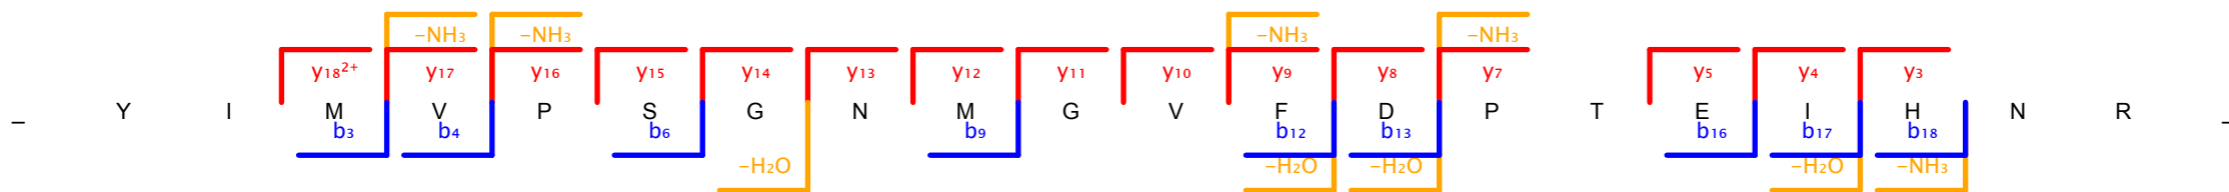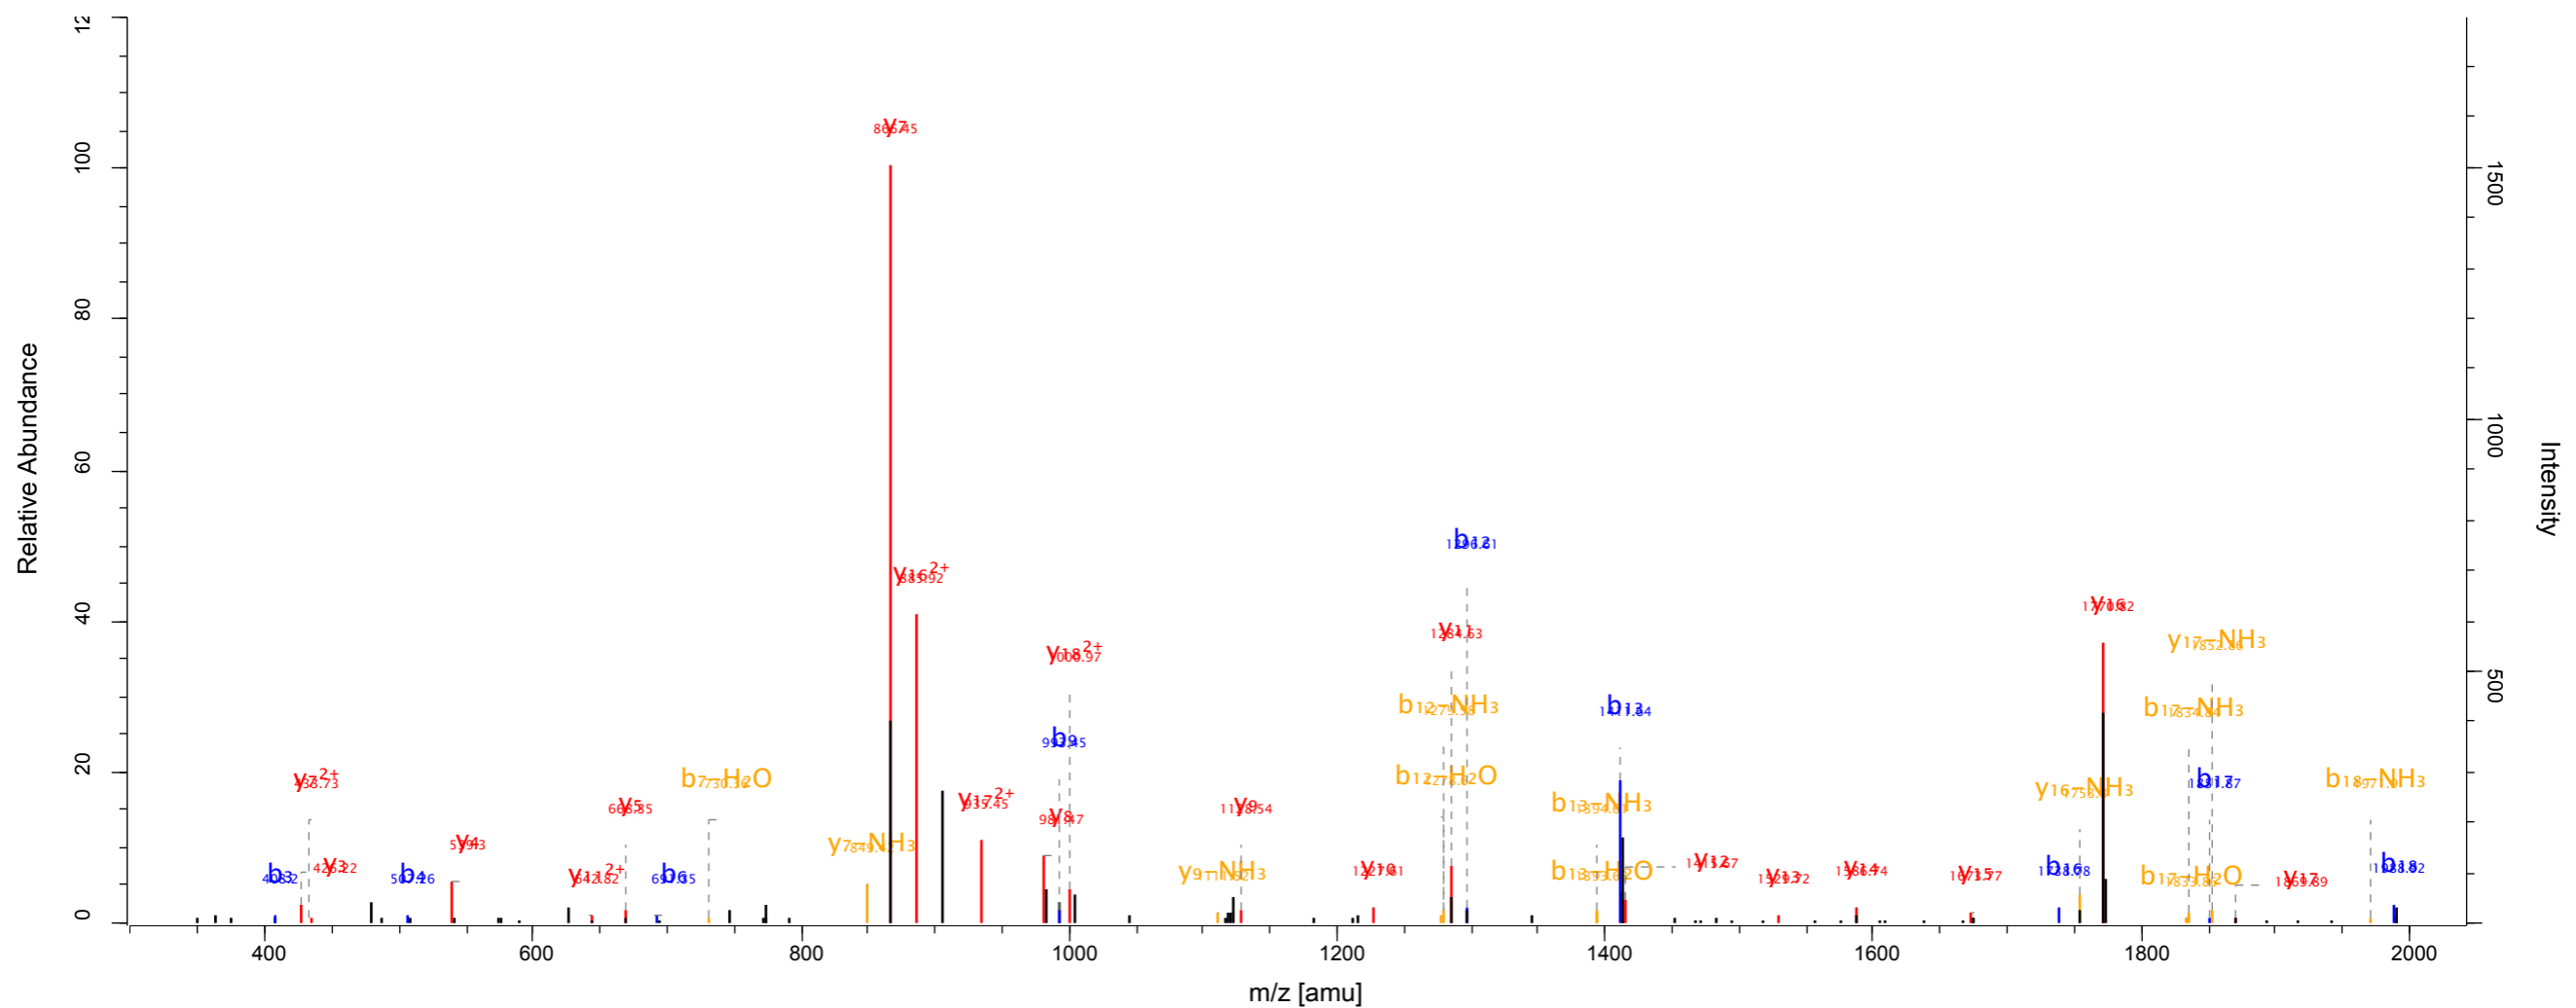

precursor information

|                   |                  |
|-------------------|------------------|
| Mass:             | 2276.07182       |
| m/z:              | 1120.04210       |
| Charge:           | 2                |
| RetentionTime:    | 87.7266540527244 |
| Score:            | 226.7288         |
| Mass Error (ppm): | 0.0055200        |
| DEP:              | 1.4206584        |
| Precursor Type:   | MULTI            |

| b ion      |                |    |     |    | y ion          |            | y <sup>2+</sup> ion |            |
|------------|----------------|----|-----|----|----------------|------------|---------------------|------------|
| Δ dalton   | mass           |    | seq |    | Δ dalton       | mass       | Δ dalton            | mass       |
|            | 164.070605005  | 1  | Y   | 19 |                |            |                     |            |
|            | 277.154668985  | 2  | I   | 18 | 2114.015756023 |            | 2114.015756023      |            |
| +0.1421572 | 408.195153592  | 3  | M   | 17 | 2000.931692043 |            | 1000.969484255      | -0.1035175 |
| -0.0703912 | 507.263567508  | 4  | V   | 16 | 1869.891207436 | -0.3284633 | 935.449241951       | +0.0296399 |
|            | 604.31633136   | 5  | P   | 15 | 1770.82279352  | -0.1549468 | 885.915034993       | +0.2397502 |
| +0.4949019 | 691.34835977   | 6  | S   | 14 | 1673.770029668 | -0.4016215 | 1673.770029668      |            |
|            | 748.369823493  | 7  | G   | 13 | 1586.738001258 | -0.1682991 | 1586.738001258      |            |
|            | 862.41275094   | 8  | N   | 12 | 1529.716537535 | -0.0569916 | 1529.716537535      |            |
| +0.1178094 | 993.453235547  | 9  | M   | 11 | 1415.673610087 | -0.1701921 | 1415.673610087      |            |
|            | 1050.47469927  | 10 | G   | 10 | 1284.633125481 | -0.0652544 | 642.820200974       | +0.4456071 |
|            | 1149.543113186 | 11 | V   | 9  | 1227.611661758 | -0.0640543 | 1227.611661758      |            |
| -0.4164587 | 1296.611527103 | 12 | F   | 8  | 1128.543247842 | +0.0127824 | 1128.543247842      |            |
| -0.2364926 | 1411.638470135 | 13 | D   | 7  | 981.474833925  | -0.0428271 | 981.474833925       |            |
|            | 1508.691233987 | 14 | P   | 6  | 866.447890893  | -0.1280667 | 433.72758368        | +0.23372   |
|            | 1609.738912461 | 15 | T   | 5  | 769.395127041  |            | 769.395127041       |            |
| -0.3746452 | 1738.781505557 | 16 | E   | 4  | 668.347448567  | -0.0176146 | 668.347448567       |            |
| -0.1547541 | 1851.865569537 | 17 | I   | 3  | 539.304855471  | +0.0407256 | 539.304855471       |            |
| -0.1459169 | 1988.9244814   | 18 | H   | 2  | 426.220791491  | +0.0376314 | 426.220791491       |            |
|            | 2102.967408847 | 19 | N   | 1  | 289.161879628  |            | 289.161879628       |            |
|            |                | 20 | R   | 0  | 175.118952181  |            | 175.118952181       |            |

general information

|                       |            |
|-----------------------|------------|
| Annotation:           | 15 of 20   |
| AminoAcids Coverage:  | 75 %       |
| Intensity Coverage:   | 65 %       |
| Peak Coverage:        | 20 %       |
| Protein Localisation: | 85 ... 104 |

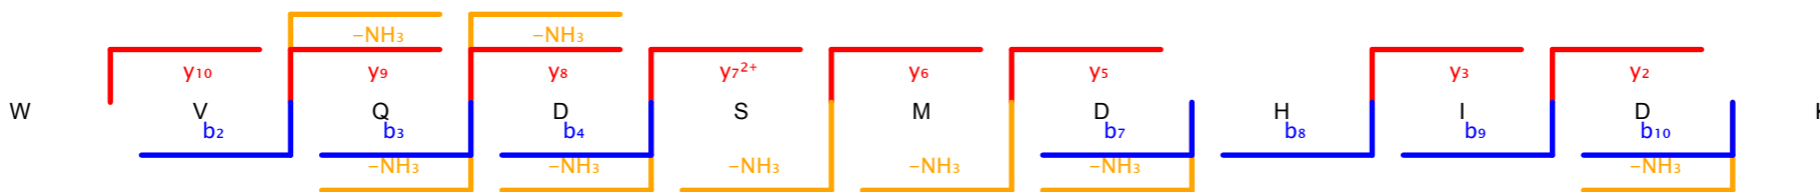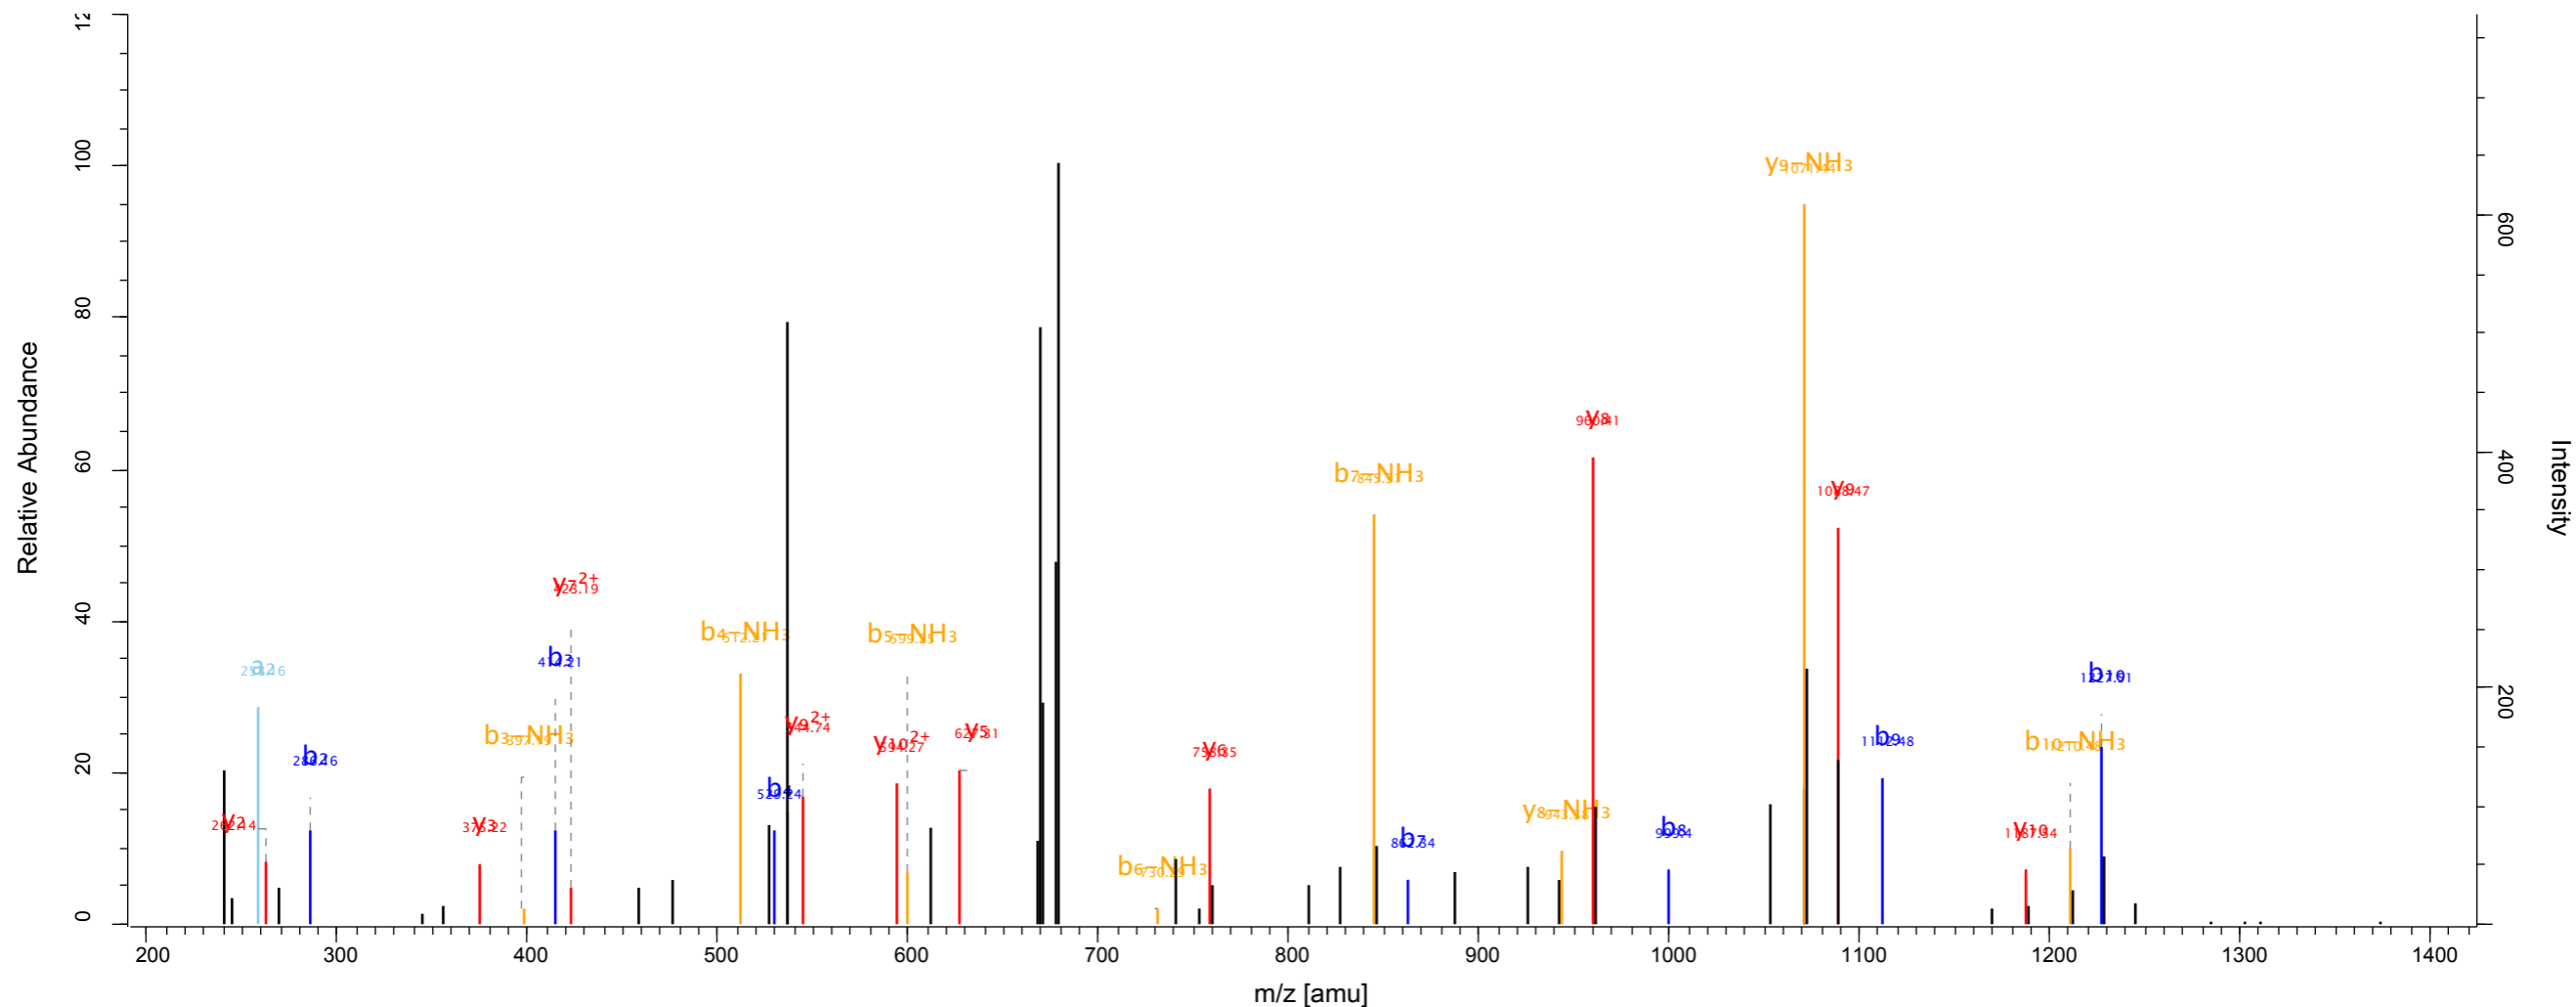

precursor information

|                   |                  |
|-------------------|------------------|
| Mass:             | 1272.6085        |
| m/z:              | 687.31152        |
| Charge:           | 2+               |
| Retention time:   | 50.2016020626465 |
| Score:            | 164.6517         |
| Mass Error (ppm): | 0.25702          |
| PEP:              | 0.00010662       |
| Precursor Type:   | ISO              |

general information

|                       |           |
|-----------------------|-----------|
| Annotation:           | 9 of 11   |
| AminoAcids Coverage:  | 82 %      |
| Intensity Coverage:   | 47 %      |
| Peak Coverage:        | 40 %      |
| Protein Localisation: | 82 ... 92 |

| a ion     |              | b ion      |              |    |     |    | y ion        |            | y <sup>2+</sup> ion |            |
|-----------|--------------|------------|--------------|----|-----|----|--------------|------------|---------------------|------------|
| Δ dalton  | mass         | Δ dalton   | mass         |    | seq |    | Δ dalton     | mass       | Δ dalton            | mass       |
|           | 159.0916748  |            | 187.08658942 | 1  | W   | 10 |              |            |                     |            |
| -0.057214 | 258.16008871 | +0.0804703 | 286.15500334 | 2  | V   | 9  | 1187.5361136 | +0.0002634 | 594.27169501        | +0.1817352 |
|           | 386.21866623 | +0.0281184 | 414.21358085 | 3  | Q   | 8  | 1088.4676996 | -0.0704828 | 544.73748805        | -0.0382083 |
|           | 501.24560926 | +0.0464024 | 529.24052388 | 4  | D   | 7  | 960.40912213 | -0.0519444 | 960.40912213        |            |
|           | 588.27763767 |            | 616.27255229 | 5  | S   | 6  | 845.38217909 |            | 423.19472778        | +0.0768787 |
|           | 719.31812227 |            | 747.3130369  | 6  | M   | 5  | 758.35015068 | -0.0212933 | 758.35015068        |            |
|           | 834.34506531 | +0.0836041 | 862.33997993 | 7  | D   | 4  | 627.30966608 | +0.0710102 | 627.30966608        |            |
|           | 971.40397717 | -0.0271267 | 999.39889179 | 8  | H   | 3  | 512.28272305 |            | 512.28272305        |            |
|           | 1084.4880411 | -0.0500944 | 1112.4829558 | 9  | I   | 2  | 375.22381118 | +0.0192918 | 375.22381118        |            |
|           | 1199.5149842 | -0.0938832 | 1227.5098988 | 10 | D   | 1  | 262.1397472  | +0.0434803 | 262.1397472         |            |
|           |              |            |              | 11 | K   | 0  | 147.11280417 |            | 147.11280417        |            |

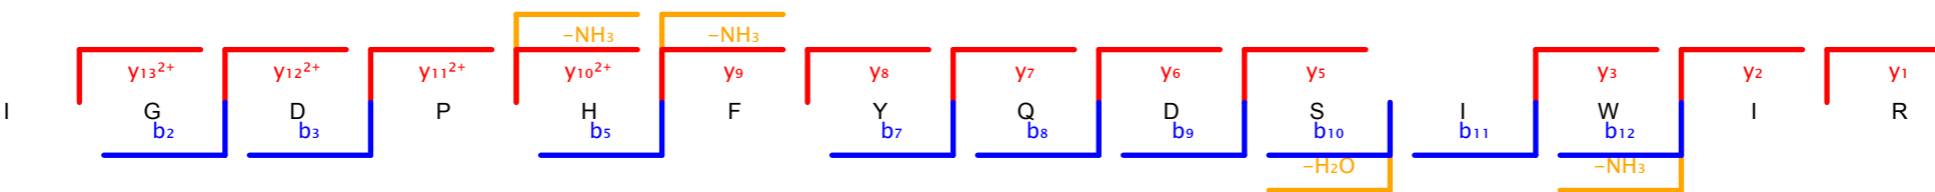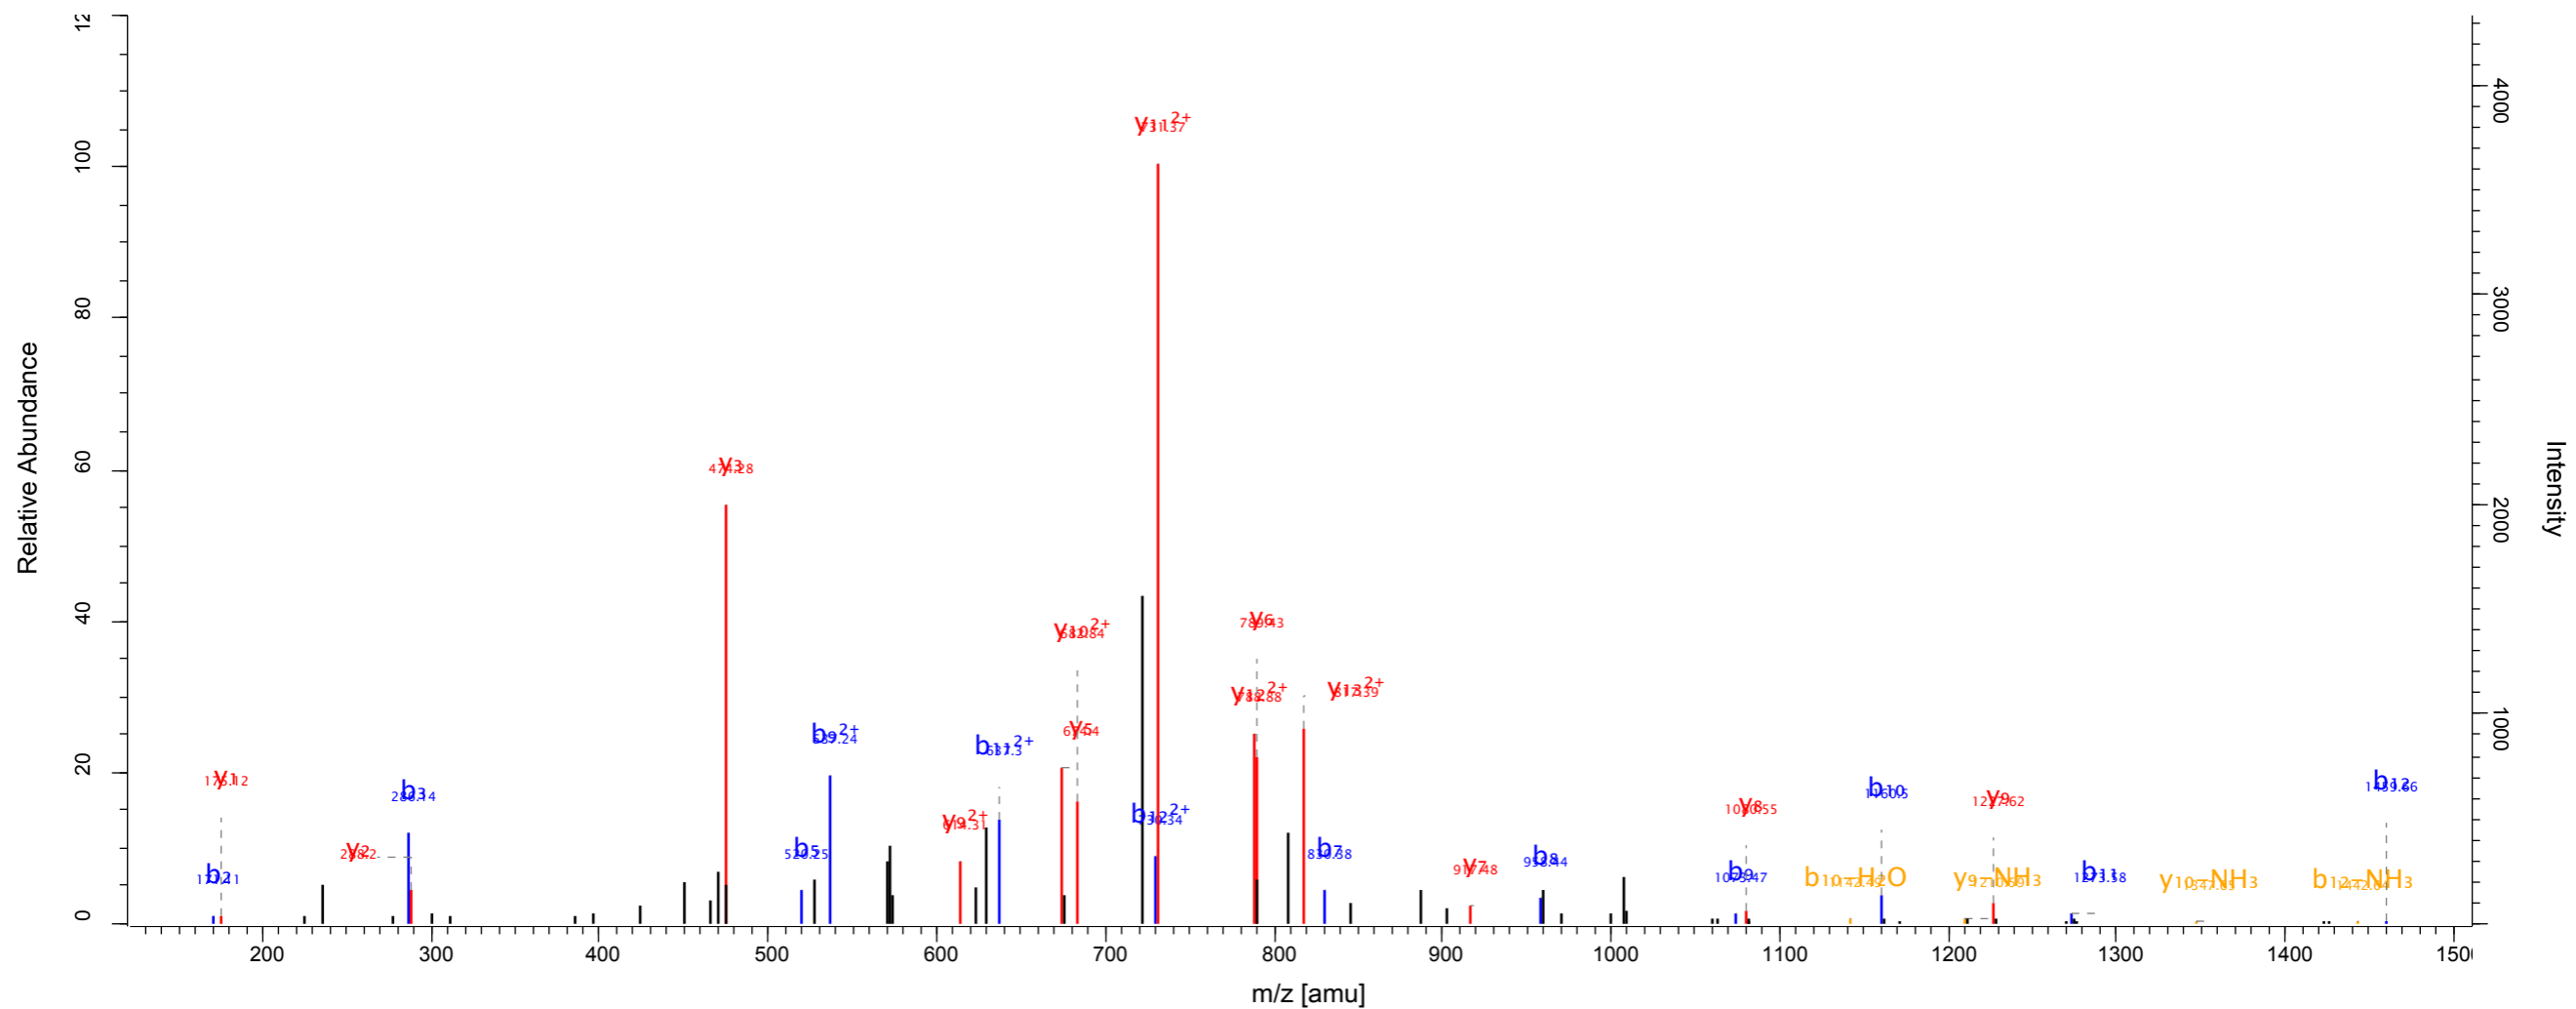

precursor information

|                   |                  |
|-------------------|------------------|
| Mass:             | 1745.85282       |
| m/z:              | 522.05855        |
| Charge:           | 2+               |
| Potentiation:     | 86.6802672230844 |
| Score:            | 104.2400         |
| Mass Error [ppm]: | 0.72168          |
| PEP:              | 1.0841516        |
| Precursor Type:   | MULTI            |

general information

|                       |             |
|-----------------------|-------------|
| Annotation:           | 13 of 14    |
| AminoAcids Coverage:  | 92%         |
| Intensity Coverage:   | 67%         |
| Peak Coverage:        | 40%         |
| Protein Localisation: | 141 ... 154 |

| b <sup>2+</sup> ion |              | b ion      |              |    |     |    | y ion        |            | y <sup>2+</sup> ion |            |
|---------------------|--------------|------------|--------------|----|-----|----|--------------|------------|---------------------|------------|
| Δ dalton            | mass         | Δ dalton   | mass         |    | seq |    | Δ dalton     | mass       | Δ dalton            | mass       |
|                     | 114.09134045 |            | 114.09134045 | 1  | I   | 13 |              |            |                     |            |
|                     | 171.11280417 | +0.1652262 | 171.11280417 | 2  | G   | 12 | 1633.775767  |            | 817.39152172        | +0.0893743 |
|                     | 286.1397472  | -0.0146251 | 286.1397472  | 3  | D   | 11 | 1576.7543032 |            | 788.88078986        | -0.0399085 |
|                     | 383.19251105 |            | 383.19251105 | 4  | P   | 10 | 1461.7273602 |            | 731.36731834        | +0.0991123 |
|                     | 520.25142292 | -0.0212593 | 520.25142292 | 5  | H   | 9  | 1364.6745964 |            | 682.84093642        | +0.1647399 |
|                     | 667.31983683 |            | 667.31983683 | 6  | F   | 8  | 1227.6156845 | -0.2784042 | 614.31148048        | +0.0969057 |
|                     | 830.38316537 | -0.026598  | 830.38316537 | 7  | Y   | 7  | 1080.5472706 | -0.2189014 | 1080.5472706        |            |
| +0.0919749          | 537.23798119 | -0.0223969 | 1073.4686859 | 9  | D   | 5  | 789.42536454 | +0.0613908 | 789.42536454        |            |
|                     | 1160.5007143 | -0.0595522 | 1160.5007143 | 10 | S   | 4  | 674.39842151 | -0.0649864 | 674.39842151        |            |
| +0.2169121          | 637.29602739 | -0.075501  | 1273.5847783 | 11 | I   | 3  | 587.3663931  |            | 587.3663931         |            |
| +0.0750827          | 730.33568386 | -0.066435  | 1459.6640913 | 12 | W   | 2  | 474.28232911 | -0.037395  | 474.28232911        |            |
|                     | 1572.7481552 |            | 1572.7481552 | 13 | I   | 1  | 288.20301616 | +0.087206  | 288.20301616        |            |
|                     |              |            |              | 14 | R   | 0  | 175.11895218 | -0.0117897 | 175.11895218        |            |



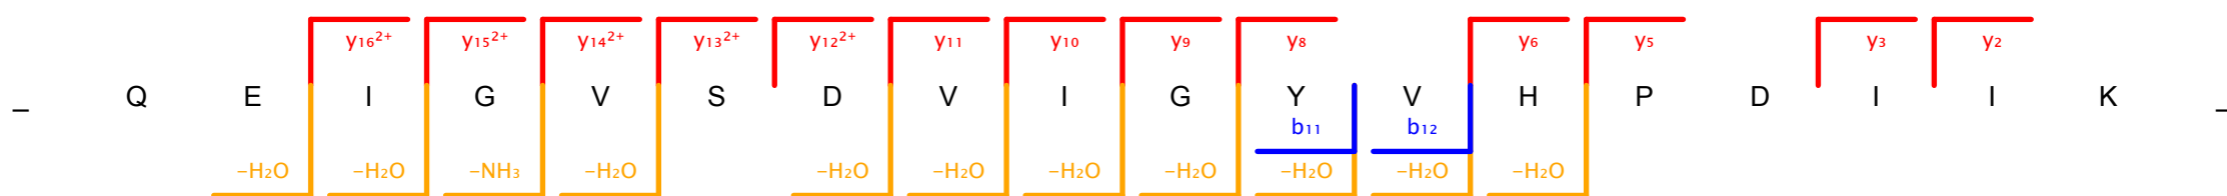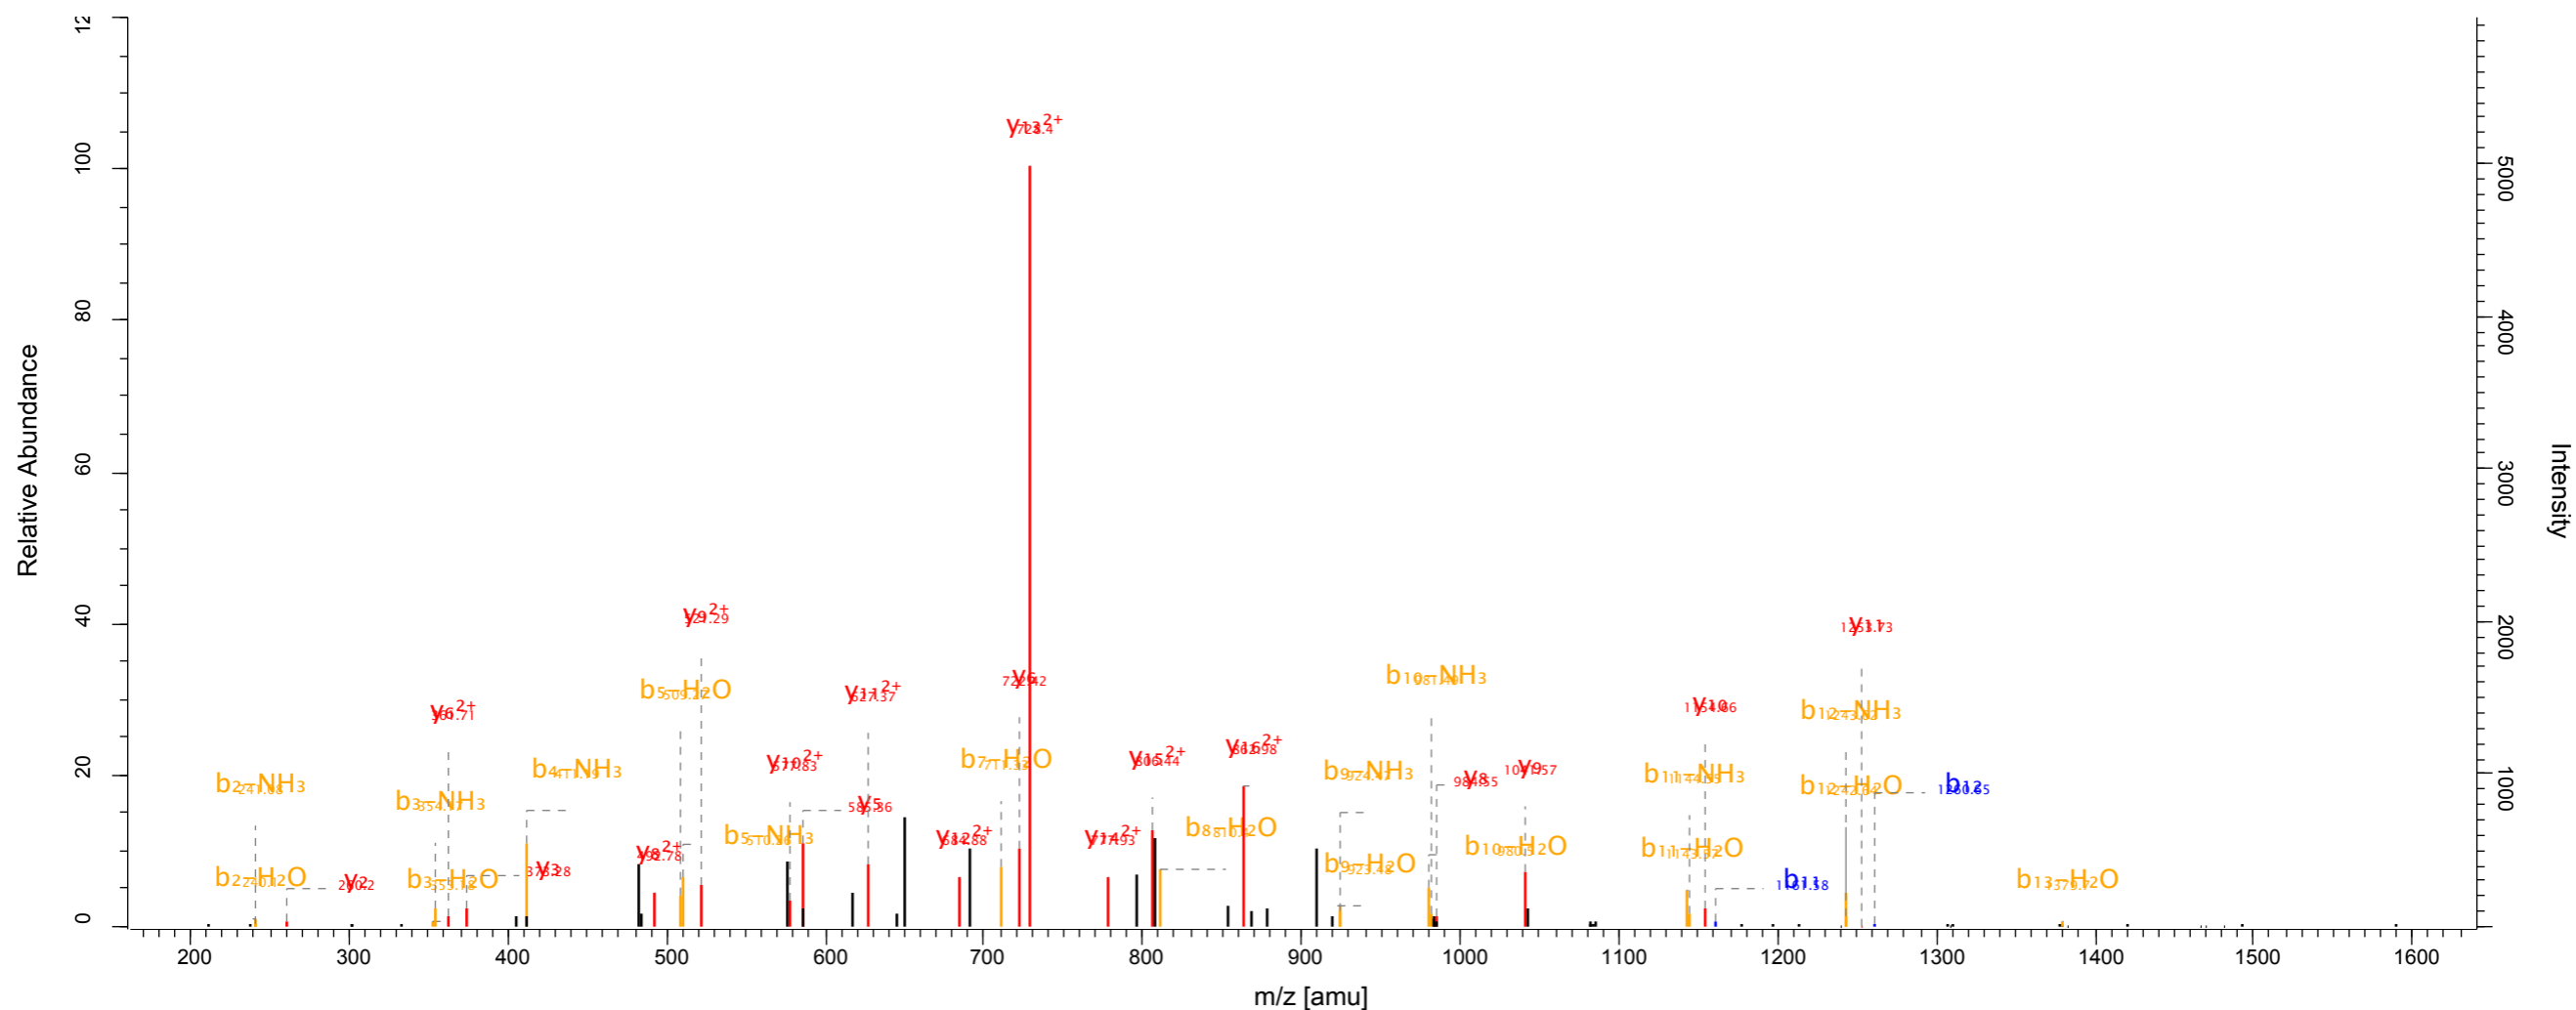

precursor information

|                   |                  |
|-------------------|------------------|
| Mass:             | 1081.05155       |
| m/z:              | 661.25770        |
| Charge:           | 2+               |
| Potenttime:       | 100.602844238281 |
| Score:            | 128.0506         |
| Mass Error (ppm): | 0.24860          |
| DEP:              | 1.16425_07       |
| Precursor Type:   | MULTI            |

| b ion      |                |    |     |    | y ion          |            | y <sup>2+</sup> ion |            |
|------------|----------------|----|-----|----|----------------|------------|---------------------|------------|
| Δ dalton   | mass           |    | seq |    | Δ dalton       | mass       | Δ dalton            | mass       |
|            | 129.065853978  | 1  | Q   | 17 |                |            |                     |            |
|            | 258.108447074  | 2  | E   | 16 | 1854.000741111 |            | 1854.000741111      |            |
|            | 371.192511055  | 3  | I   | 15 | 1724.958148015 |            | 862.982712241       | +0.1732326 |
|            | 428.213974778  | 4  | G   | 14 | 1611.874084034 |            | 806.44068025        | -0.0643985 |
|            | 527.282388694  | 5  | V   | 13 | 1554.852620311 |            | 777.929948389       | -0.0705124 |
|            | 614.314417104  | 6  | S   | 12 | 1455.784206394 |            | 728.39574143        | +0.1760359 |
|            | 729.341360136  | 7  | D   | 11 | 1368.752177984 |            | 684.879727226       | +0.1940643 |
|            | 828.409774053  | 8  | V   | 10 | 1253.725234953 | -0.0567779 | 627.36625571        | +0.1345377 |
|            | 941.493838033  | 9  | I   | 9  | 1154.656821036 | -0.1465671 | 577.832048751       | +0.1465279 |
|            | 998.515301757  | 10 | G   | 8  | 1041.572757056 | -0.1020539 | 521.290016761       | +0.0049661 |
| +0.0534498 | 1161.578630295 | 11 | Y   | 7  | 984.551293332  | -0.1068964 | 492.779284899       | +0.2100339 |
| -0.1610823 | 1260.647044211 | 12 | V   | 6  | 821.487964794  |            | 821.487964794       |            |
|            | 1397.705956073 | 13 | H   | 5  | 722.419550878  | -0.0619459 | 361.713413672       | +0.2246356 |
|            | 1494.758719925 | 14 | P   | 4  | 585.360639015  | -0.0401434 | 585.360639015       |            |
|            | 1609.785662957 | 15 | D   | 3  | 488.307875163  |            | 488.307875163       |            |
|            | 1722.869726938 | 16 | I   | 2  | 373.280932131  | +0.0058721 | 373.280932131       |            |
|            | 1835.953790918 | 17 | I   | 1  | 260.196868151  | +0.0578316 | 260.196868151       |            |
|            |                | 18 | K   | 0  | 147.112804171  |            | 147.112804171       |            |

general information

|                       |           |
|-----------------------|-----------|
| Annotation:           | 15 of 18  |
| AminoAcids Coverage:  | 82 %      |
| Intensity Coverage:   | 72 %      |
| Peak Coverage:        | 45 %      |
| Protein Localisation: | 64 ... 81 |

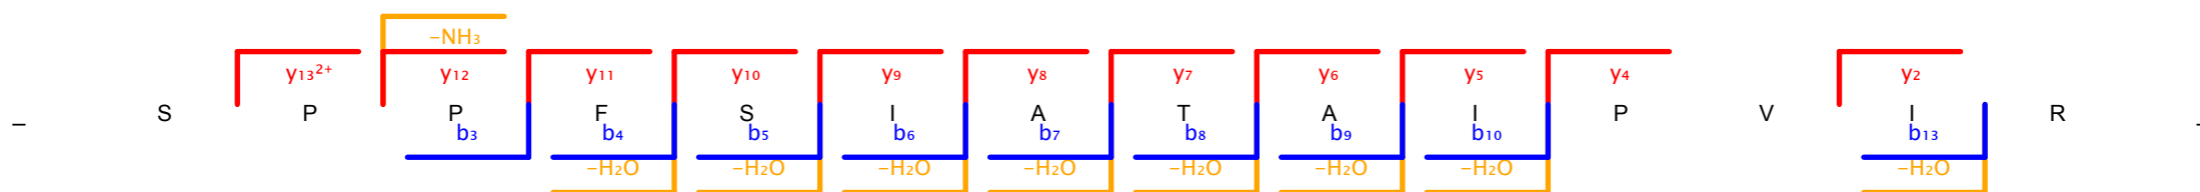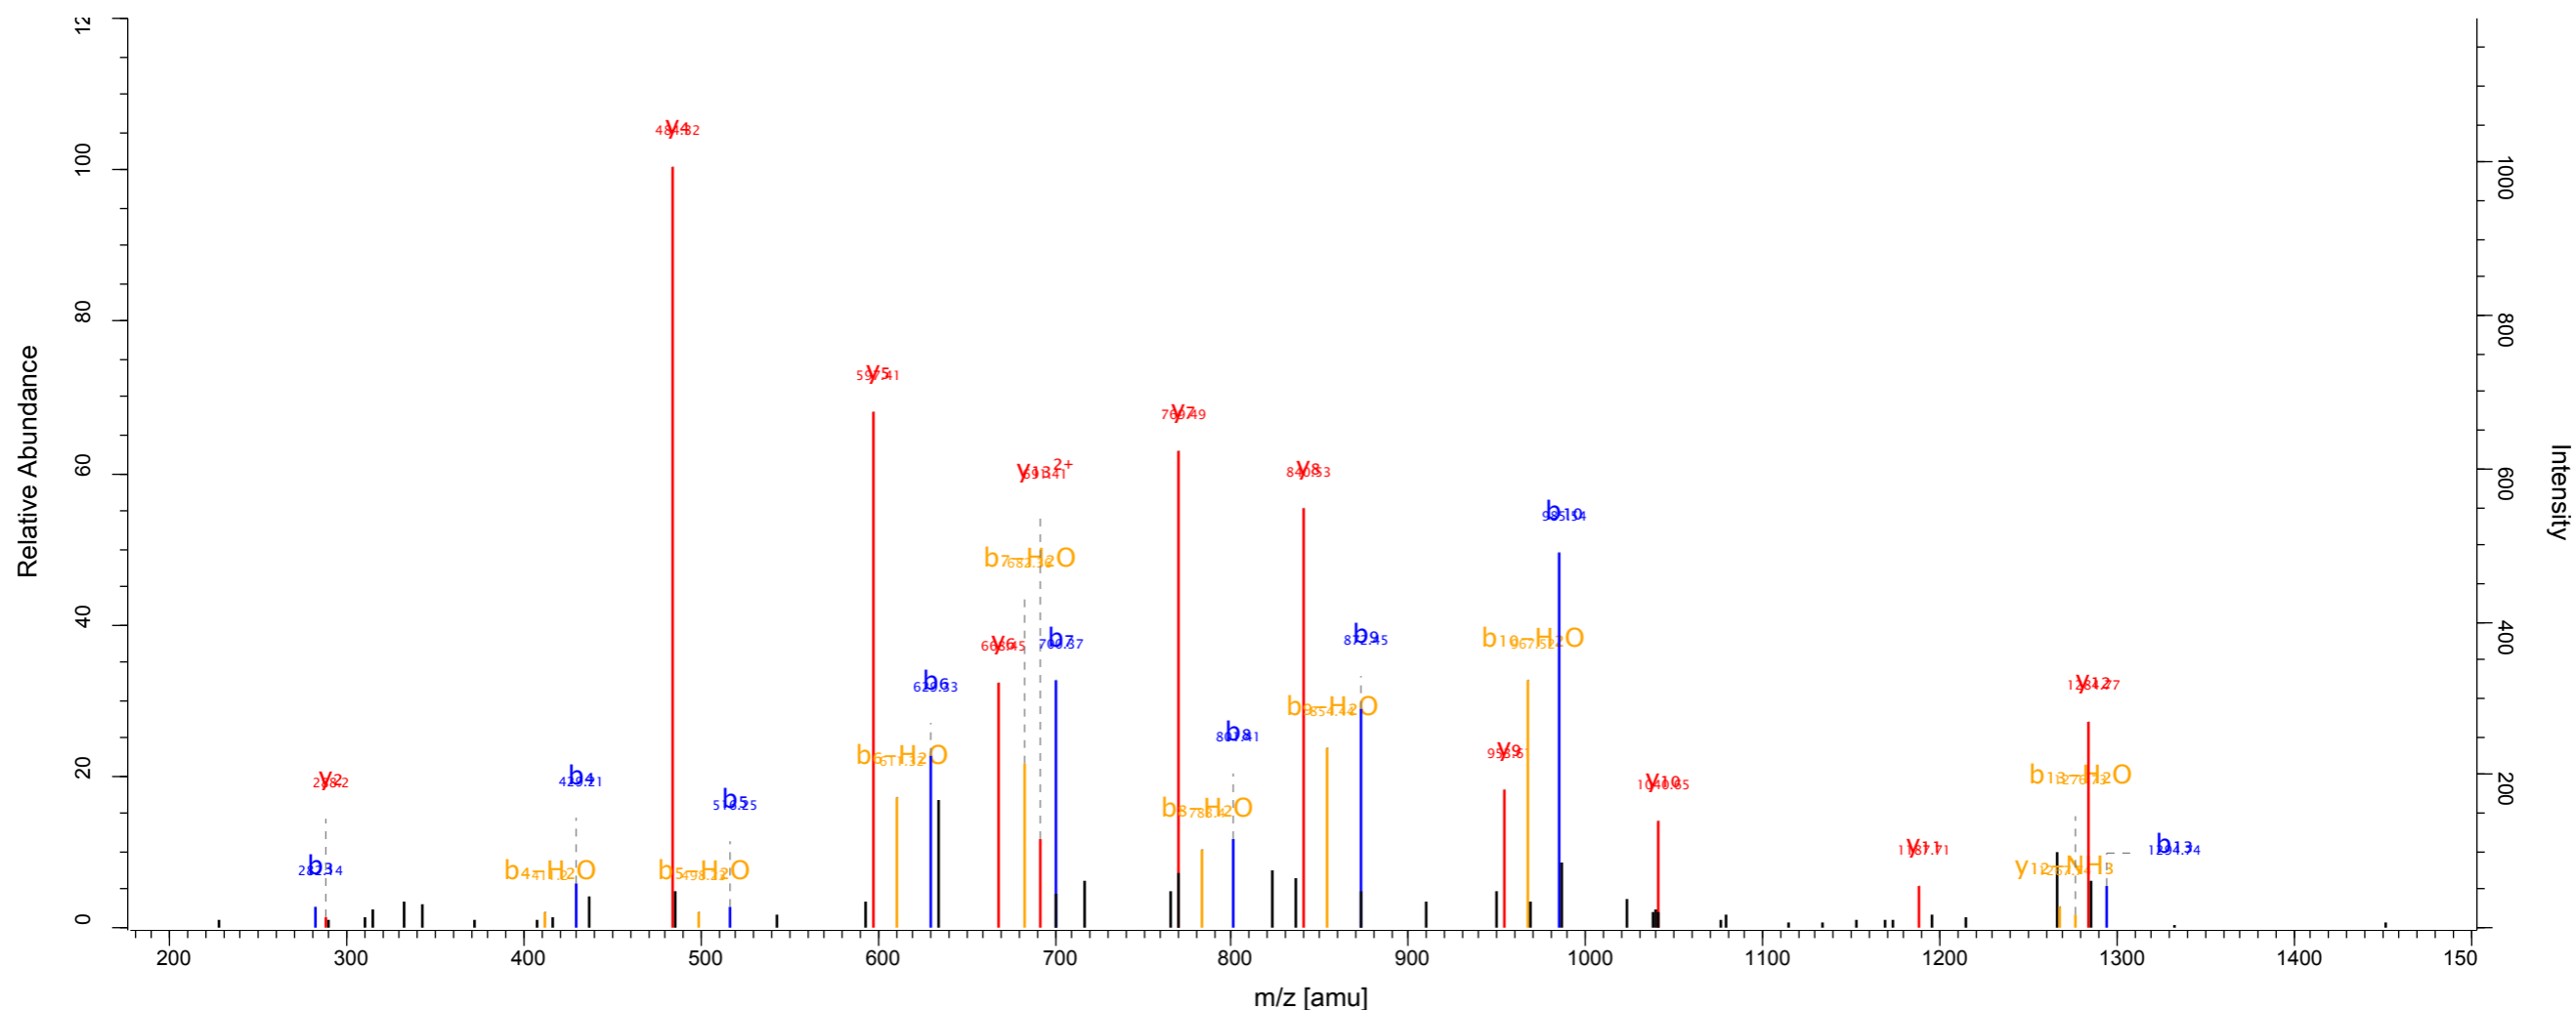

precursor information

|                   |                  |
|-------------------|------------------|
| Mass:             | 1467.84757       |
| m/z:              | 724.02106        |
| Charge:           | 2+               |
| Potential time:   | 102.776245117188 |
| Score:            | 211.2632         |
| Mass Error [ppm]: | 1.7850           |
| PEP:              | 0.255518         |
| Precursor Type:   | ISO              |

general information

|                       |             |
|-----------------------|-------------|
| Annotation:           | 11 of 14    |
| AminoAcids Coverage:  | 70%         |
| Intensity Coverage:   | 82%         |
| Peak Coverage:        | 41%         |
| Protein Localisation: | 212 ... 225 |

| b ion      |                |    |     |    | y ion          |            |                | y <sup>2+</sup> ion |  |
|------------|----------------|----|-----|----|----------------|------------|----------------|---------------------|--|
| Δ dalton   | mass           |    | seq |    | Δ dalton       | mass       | Δ dalton       | mass                |  |
|            | 88.039304876   | 1  | S   | 13 |                |            |                |                     |  |
|            | 185.092068728  | 2  | P   | 12 | 1381.82019797  |            | 691.413737218  | -0.0583905          |  |
| +0.0363198 | 282.14483258   | 3  | P   | 11 | 1284.767434118 | -0.2089624 | 1284.767434118 |                     |  |
| +0.0452984 | 429.213246497  | 4  | F   | 10 | 1187.714670266 | -0.1073705 | 1187.714670266 |                     |  |
| +0.0209604 | 516.245274907  | 5  | S   | 9  | 1040.64625635  | -0.0124673 | 1040.64625635  |                     |  |
| -0.0616997 | 629.329338887  | 6  | I   | 8  | 953.61422794   | -0.0840155 | 953.61422794   |                     |  |
| -0.236875  | 700.366452675  | 7  | A   | 7  | 840.53016396   | -0.0975468 | 840.53016396   |                     |  |
| -0.1702957 | 801.414131149  | 8  | T   | 6  | 769.493050172  | -0.0990072 | 769.493050172  |                     |  |
| -0.0846068 | 872.451244937  | 9  | A   | 5  | 668.445371698  | -0.0775738 | 668.445371698  |                     |  |
| -0.2555848 | 985.535308917  | 10 | I   | 4  | 597.40825791   | -0.0429015 | 597.40825791   |                     |  |
|            | 1082.588072769 | 11 | P   | 3  | 484.32419393   | -0.0242672 | 484.32419393   |                     |  |
|            | 1181.656486685 | 12 | V   | 2  | 387.271430078  |            | 387.271430078  |                     |  |
| -0.3114735 | 1294.740550666 | 13 | I   | 1  | 288.203016161  | -0.2638072 | 288.203016161  |                     |  |
|            |                | 14 | R   | 0  | 175.118952181  |            | 175.118952181  |                     |  |

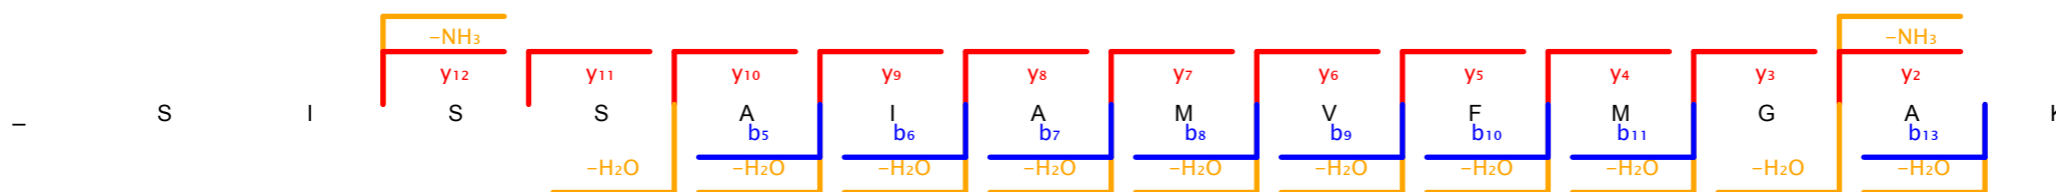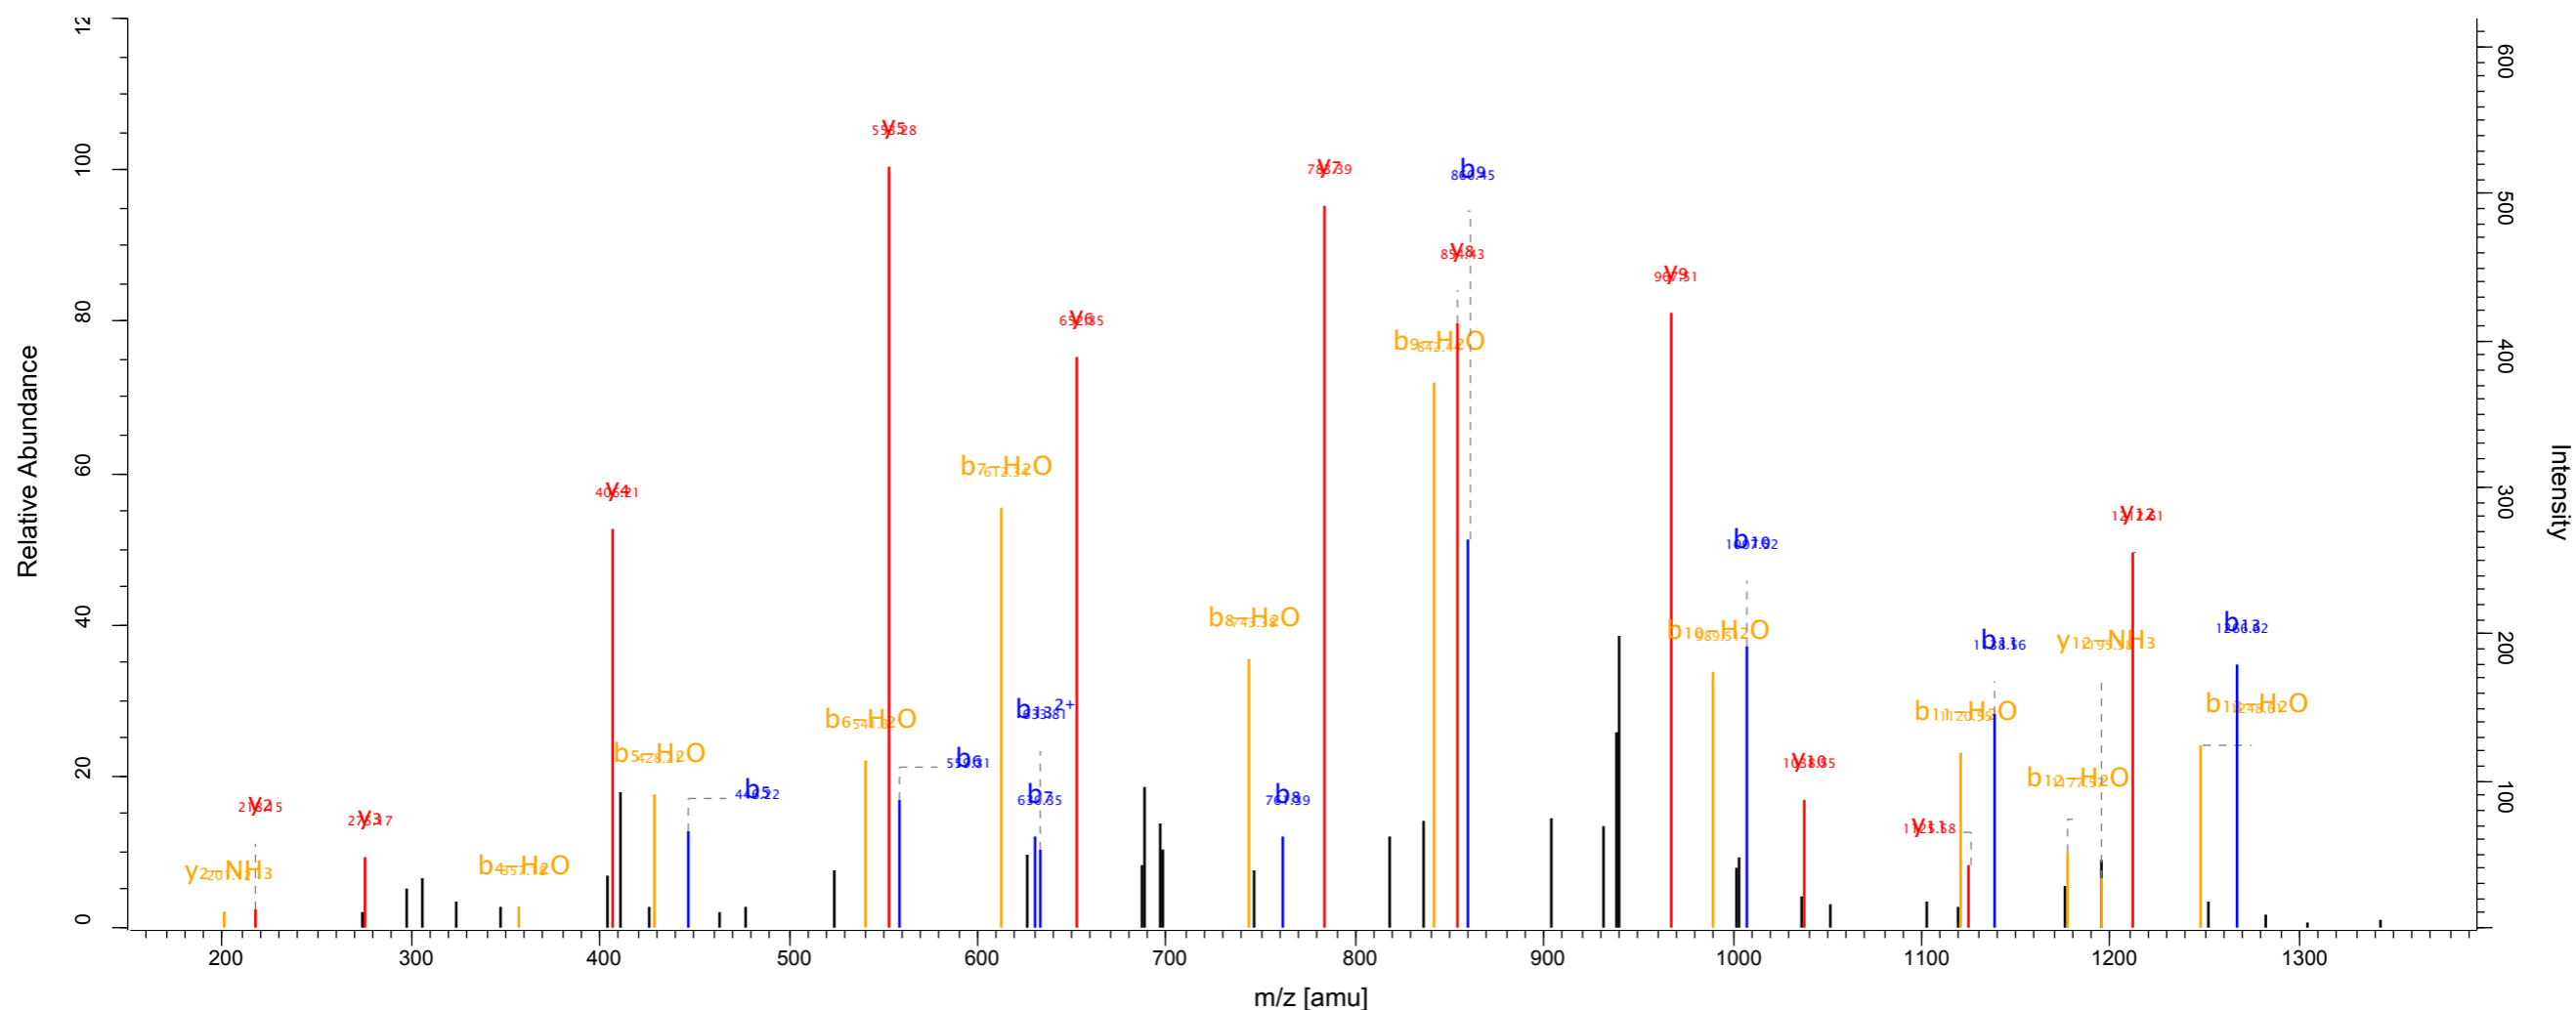

precursor information

|                   |                 |
|-------------------|-----------------|
| Mass:             | 1411.72068      |
| m/z:              | 706.86762       |
| Charge:           | 2+              |
| Potentiation:     | 111.24560546875 |
| Score:            | 250.2208        |
| Mass Error [ppm]: | 0.22027         |
| PEP:              | 2.2071575       |
| Precursor Type:   | MULTI           |

general information

|                       |          |
|-----------------------|----------|
| Annotation:           | 12 of 14 |
| AminoAcids Coverage:  | 86%      |
| Intensity Coverage:   | 70%      |
| Peak Coverage:        | 48%      |
| Protein Localisation: | 2 ... 15 |

| b <sup>2+</sup> ion |                | b ion      |                |     | y ion |          |                |            |
|---------------------|----------------|------------|----------------|-----|-------|----------|----------------|------------|
| Δ dalton            | mass           | Δ dalton   | mass           | seq |       | Δ dalton | mass           |            |
|                     | 88.039304876   |            | 88.039304876   | 1   | S     | 13       |                |            |
|                     | 201.123368857  |            | 201.123368857  | 2   | I     | 12       | 1325.695591083 |            |
|                     | 288.155397267  |            | 288.155397267  | 3   | S     | 11       | 1212.611527103 | -0.1901404 |
|                     | 375.187425677  |            | 375.187425677  | 4   | S     | 10       | 1125.579498693 | -0.0580143 |
|                     | 446.224539464  | +0.0384    | 446.224539464  | 5   | A     | 9        | 1038.547470283 | -0.0134127 |
|                     | 559.308603445  | -0.1715795 | 559.308603445  | 6   | I     | 8        | 967.510356495  | -0.026897  |
|                     | 630.345717233  | +0.0086529 | 630.345717233  | 7   | A     | 7        | 854.426292515  | +0.069374  |
|                     | 761.386201839  | +0.007658  | 761.386201839  | 8   | M     | 6        | 783.389178727  | -0.174396  |
|                     | 860.454615755  | -0.0619156 | 860.454615755  | 9   | V     | 5        | 652.348694121  | +0.0130002 |
|                     | 1007.523029671 | -0.1338085 | 1007.523029671 | 10  | F     | 4        | 553.280280204  | -0.0201484 |
|                     | 1138.563514278 | -0.2092662 | 1138.563514278 | 11  | M     | 3        | 406.211866288  | +0.0738393 |
|                     | 1195.584978001 |            | 1195.584978001 | 12  | G     | 2        | 275.171381682  | +0.0564626 |
| -0.1156485          | 633.814684128  | -0.0951142 | 1266.622091789 | 13  | A     | 1        | 218.149917958  | -0.0002598 |
|                     |                |            |                | 14  | K     | 0        | 147.112804171  |            |

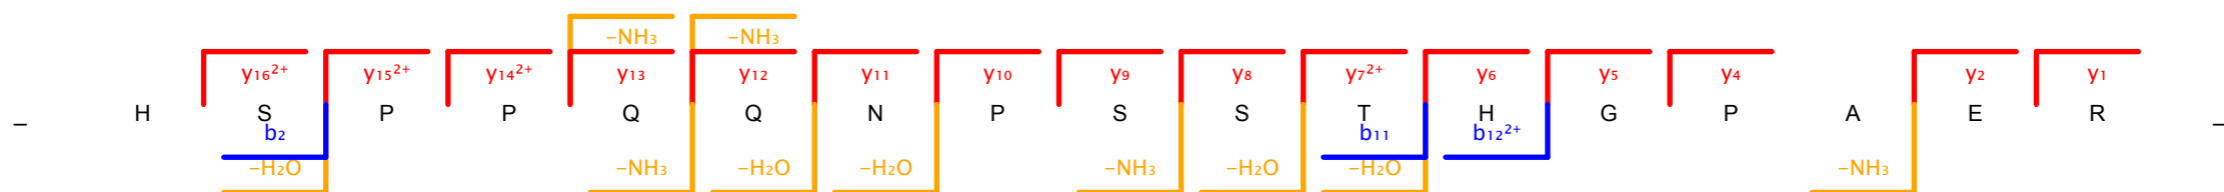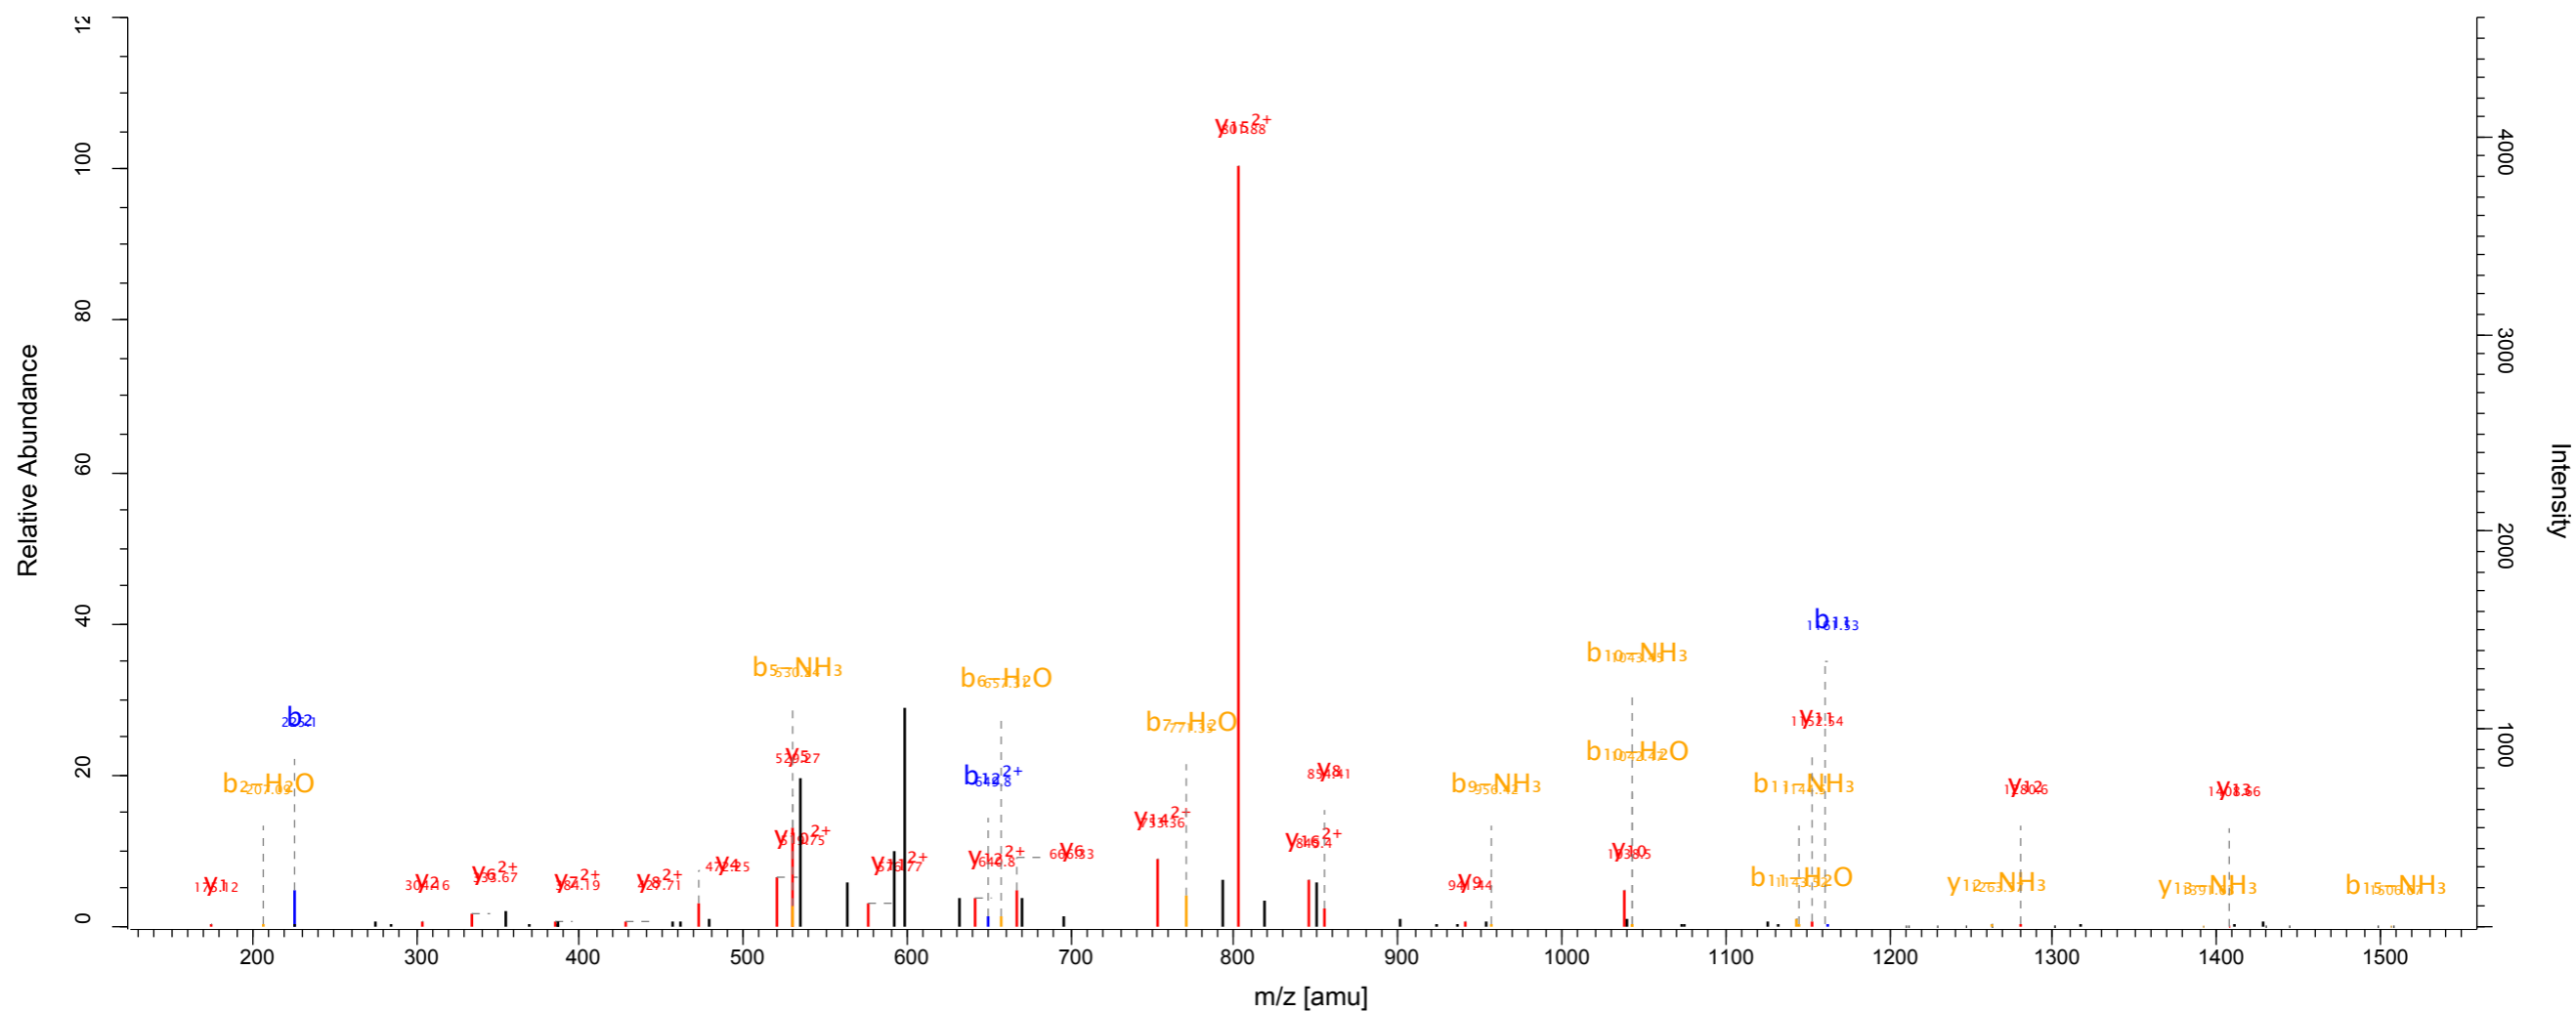

precursor information

|                   |                  |
|-------------------|------------------|
| Mass:             | 1825.84632       |
| m/z:              | 600.62272        |
| Charge:           | 2+               |
| Retention time:   | 28.7569588256826 |
| Score:            | 172.0587         |
| Mass Error [ppm]: | 0.40934          |
| DEP:              | 6.08175_12       |
| Precursor Type:   | ISO              |

| b <sup>2+</sup> ion |              | b ion      |              |    |     |    | y ion        |            | y <sup>2+</sup> ion |            |
|---------------------|--------------|------------|--------------|----|-----|----|--------------|------------|---------------------|------------|
| Δ dalton            | mass         | Δ dalton   | mass         |    | seq |    | Δ dalton     | mass       | Δ dalton            | mass       |
|                     | 138.06618833 |            | 138.06618833 | 1  | H   | 16 |              |            |                     |            |
|                     | 225.09821674 | +0.1023295 | 225.09821674 | 2  | S   | 15 | 1689.7939362 |            | 845.40060635        | +0.1604288 |
|                     | 322.15098059 |            | 322.15098059 | 3  | P   | 14 | 1602.7619078 |            | 801.88459214        | +0.2147121 |
|                     | 419.20374444 |            | 419.20374444 | 4  | P   | 13 | 1505.709144  |            | 753.35821022        | +0.1965994 |
|                     | 547.26232195 |            | 547.26232195 | 5  | Q   | 12 | 1408.6563801 | -0.1877522 | 1408.6563801        |            |
|                     | 675.32089947 |            | 675.32089947 | 6  | Q   | 11 | 1280.5978026 | +0.3715577 | 640.80253954        | +0.1226924 |
|                     | 789.36382691 |            | 789.36382691 | 7  | N   | 10 | 1152.5392251 | -0.1356606 | 576.77325078        | +0.1819494 |
|                     | 886.41659076 |            | 886.41659076 | 8  | P   | 9  | 1038.4962976 | -0.0994471 | 519.75178706        | +0.2352125 |
|                     | 973.44861917 |            | 973.44861917 | 9  | S   | 8  | 941.4435338  | -0.2696446 | 941.4435338         |            |
|                     | 1060.4806476 |            | 1060.4806476 | 10 | S   | 7  | 854.41150539 | -0.0545718 | 427.70939093        | +0.0965783 |
|                     | 1161.5283261 | +0.2143497 | 1161.5283261 | 11 | T   | 6  | 767.37947698 |            | 384.19337672        | +0.0923899 |
| +0.0889122          | 649.79725719 |            | 1298.5872379 | 12 | H   | 5  | 666.3317985  | +0.0613289 | 333.66953748        | +0.1133605 |
|                     | 1355.6087016 |            | 1355.6087016 | 13 | G   | 4  | 529.27288664 | +0.0294815 | 529.27288664        |            |
|                     | 1452.6614655 |            | 1452.6614655 | 14 | P   | 3  | 472.25142292 | +0.0045585 | 472.25142292        |            |
|                     | 1523.6985793 |            | 1523.6985793 | 15 | A   | 2  | 375.19865906 |            | 375.19865906        |            |
|                     | 1652.7411724 |            | 1652.7411724 | 16 | E   | 1  | 304.16154528 | -0.0004735 | 304.16154528        |            |
|                     |              |            |              | 17 | R   | 0  | 175.11895218 | +0.1340996 | 175.11895218        |            |

general information

|                       |             |
|-----------------------|-------------|
| Annotation:           | 16 of 17    |
| AminoAcids Coverage:  | 94 %        |
| Intensity Coverage:   | 64 %        |
| Peak Coverage:        | 45 %        |
| Protein Localisation: | 283 ... 299 |

Scan number 8926 Raw file 20081002\_Orbi5\_SaZa\_SA\_ADH\_Laminin\_24h\_Exp\_2\_InGel\_10  
 Method ITMS; CID Genenames MMP10

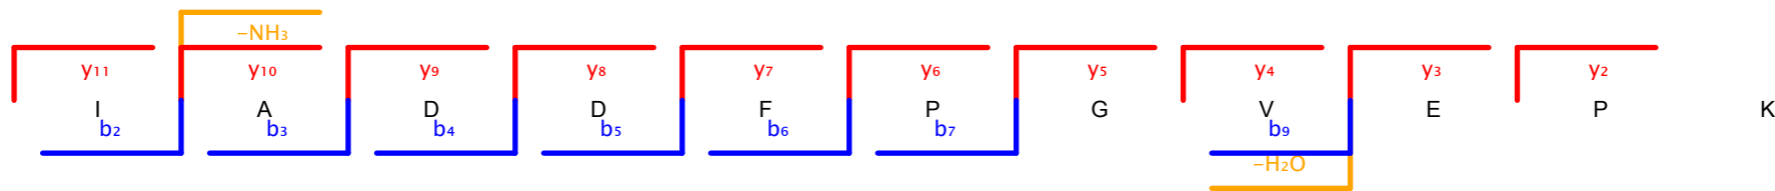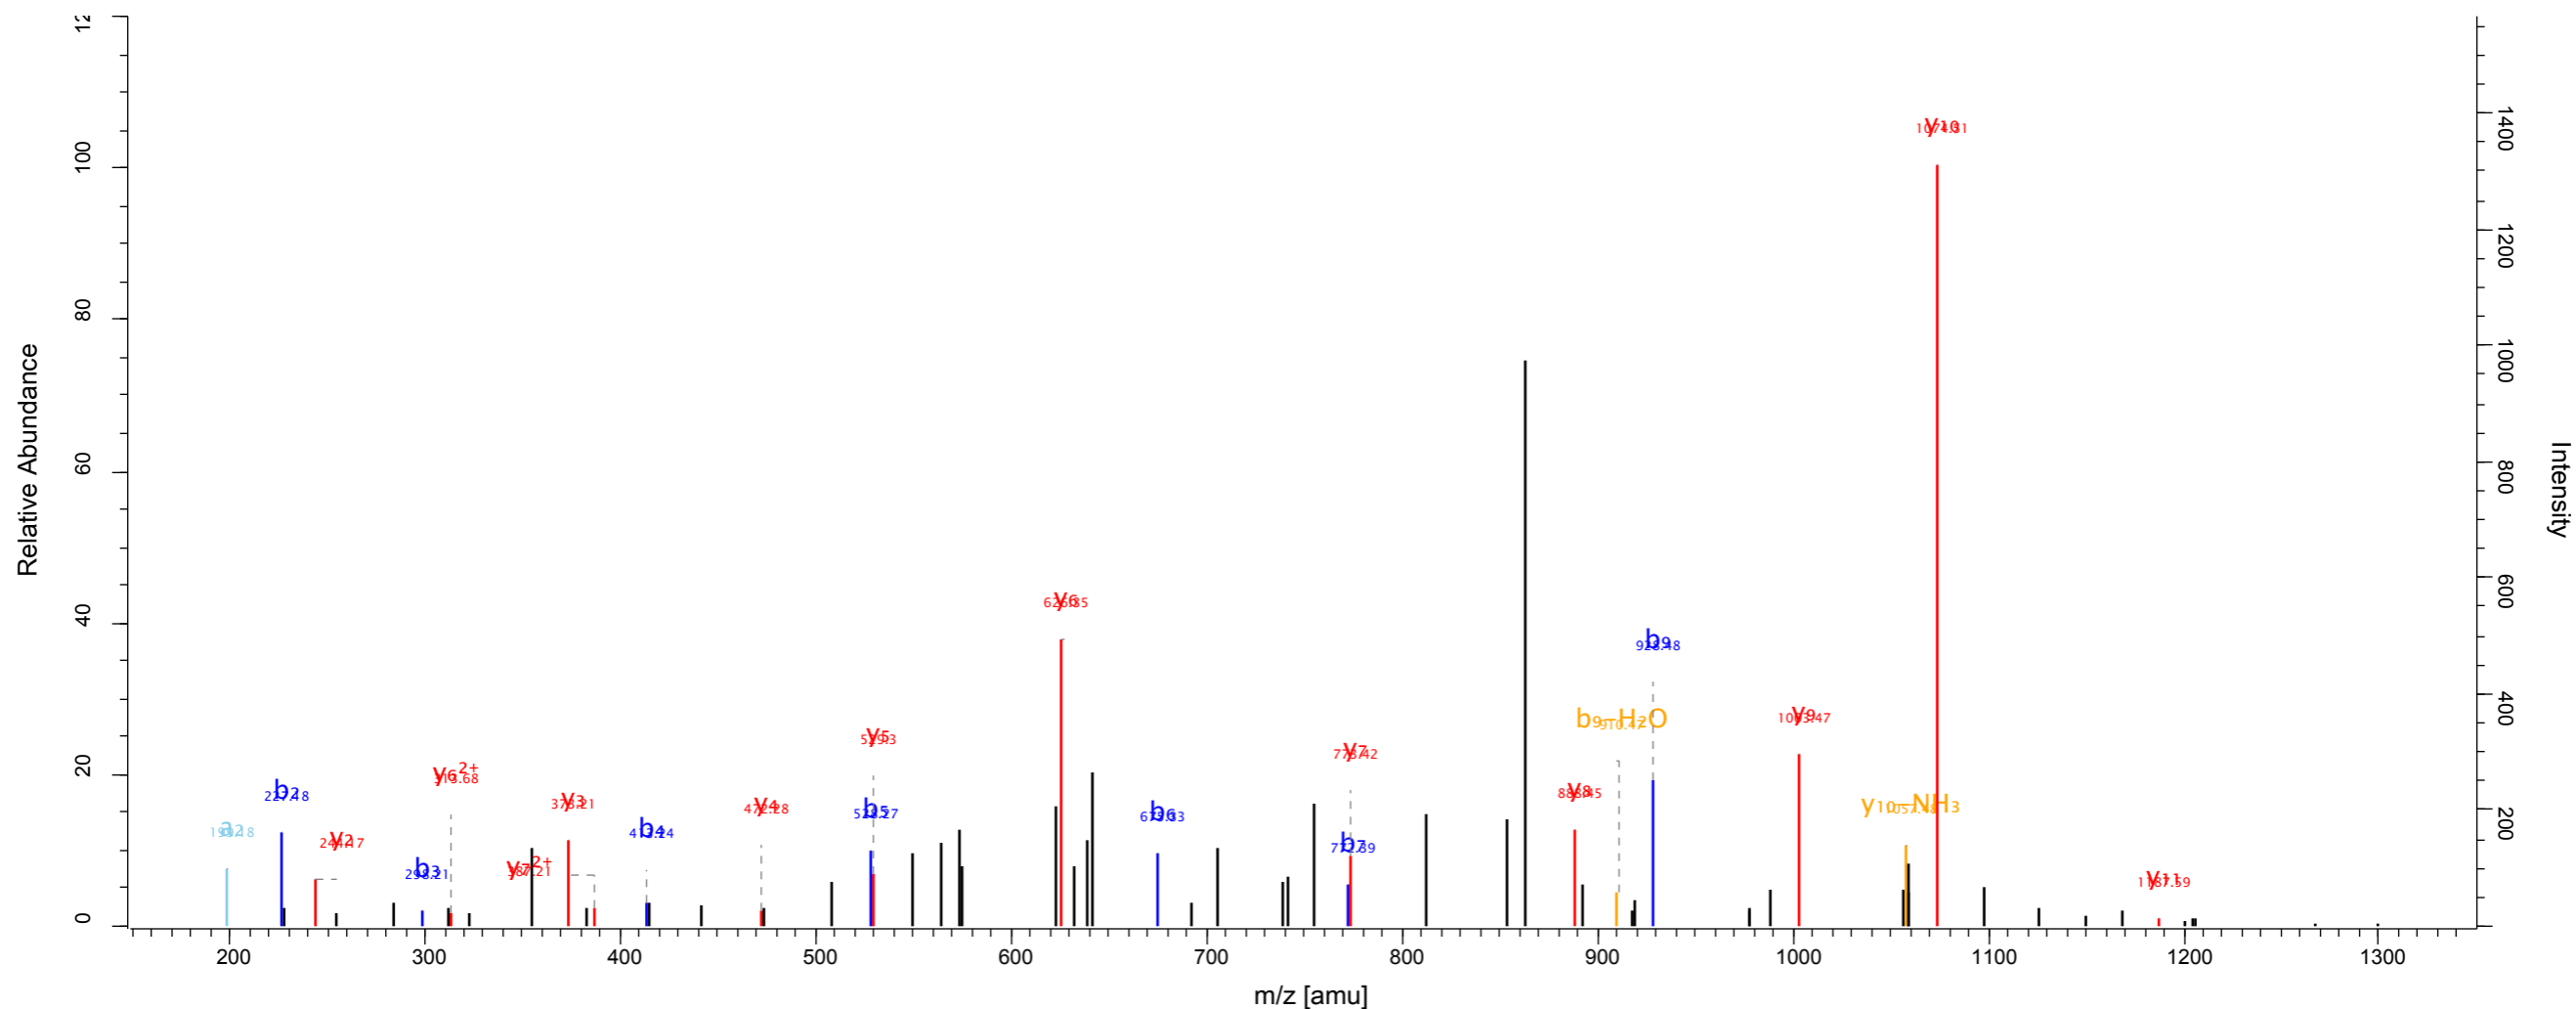

precursor information

|                   |                  |
|-------------------|------------------|
| Mass:             | 1200.67110       |
| m/z:              | 650.81287        |
| Charge:           | 2+               |
| Retentiontime:    | 60.2424011230460 |
| Score:            | 136.5002         |
| Mass Error [ppm]: | 0.006884         |
| PEP:              | 0.00024825       |
| Precursor Type:   | ISO              |

general information

|                       |             |
|-----------------------|-------------|
| Annotation:           | 10 of 12    |
| AminoAcids Coverage:  | 82 %        |
| Intensity Coverage:   | 47 %        |
| Peak Coverage:        | 22 %        |
| Protein Localisation: | 424 ... 435 |

| a ion      |              | b ion      |              |    |     |    | y ion        |            | y <sup>2+</sup> ion |            |
|------------|--------------|------------|--------------|----|-----|----|--------------|------------|---------------------|------------|
| Δ dalton   | mass         | Δ dalton   | mass         |    | seq |    | Δ dalton     | mass       | Δ dalton            | mass       |
|            | 86.096425825 |            | 114.09134045 | 1  | I   | 11 |              |            |                     |            |
| +0.0317294 | 199.18048981 | +0.0141708 | 227.17540443 | 2  | I   | 10 | 1187.5942804 | -0.0734063 | 1187.5942804        |            |
|            | 270.21760359 | +0.0258851 | 298.21251822 | 3  | A   | 9  | 1074.5102164 | -0.0723502 | 1074.5102164        |            |
|            | 385.24454663 | +0.0666911 | 413.23946125 | 4  | D   | 8  | 1003.4731026 | -0.1171456 | 1003.4731026        |            |
|            | 500.27148966 | +0.2179097 | 528.26640428 | 5  | D   | 7  | 888.44615956 | -0.0088427 | 888.44615956        |            |
|            | 647.33990357 | -0.0336097 | 675.3348182  | 6  | F   | 6  | 773.41921653 | +0.0575291 | 387.2132465         | +0.0426739 |
|            | 744.39266743 | +0.4563511 | 772.38758205 | 7  | P   | 5  | 626.35080261 | -0.1244843 | 313.67903954        | -0.4511648 |
|            | 801.41413115 |            | 829.40904577 | 8  | G   | 4  | 529.29803876 | +0.0004232 | 529.29803876        |            |
|            | 900.48254507 | -0.1752746 | 928.47745969 | 9  | V   | 3  | 472.27657504 | +0.107092  | 472.27657504        |            |
|            | 1029.5251382 |            | 1057.5200528 | 10 | E   | 2  | 373.20816112 | +0.0412285 | 373.20816112        |            |
|            | 1126.577902  |            | 1154.5728166 | 11 | P   | 1  | 244.16556802 | +0.031545  | 244.16556802        |            |
|            |              |            |              | 12 | K   | 0  | 147.11280417 |            | 147.11280417        |            |

Scan number 13340 Raw file 20081010\_Orbi7\_SaZa\_SA\_ADH\_Exp\_3\_Laminin\_24h\_InGel\_08  
 Method ITMS; CID Genenames NR2C1

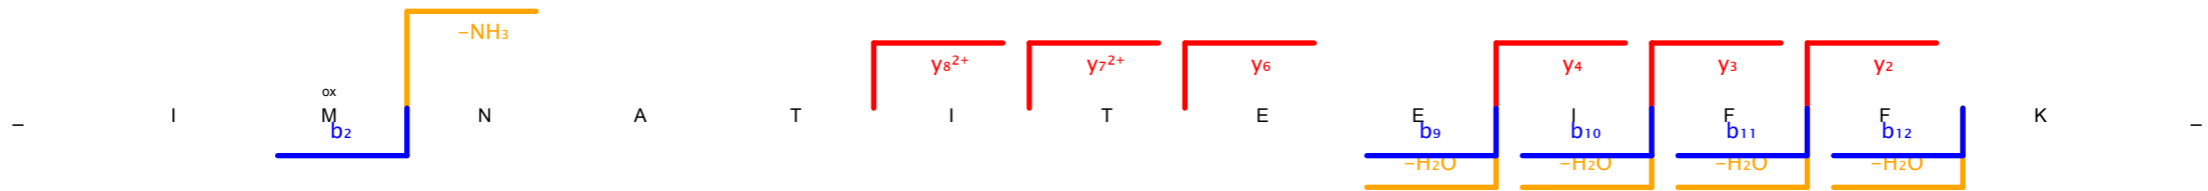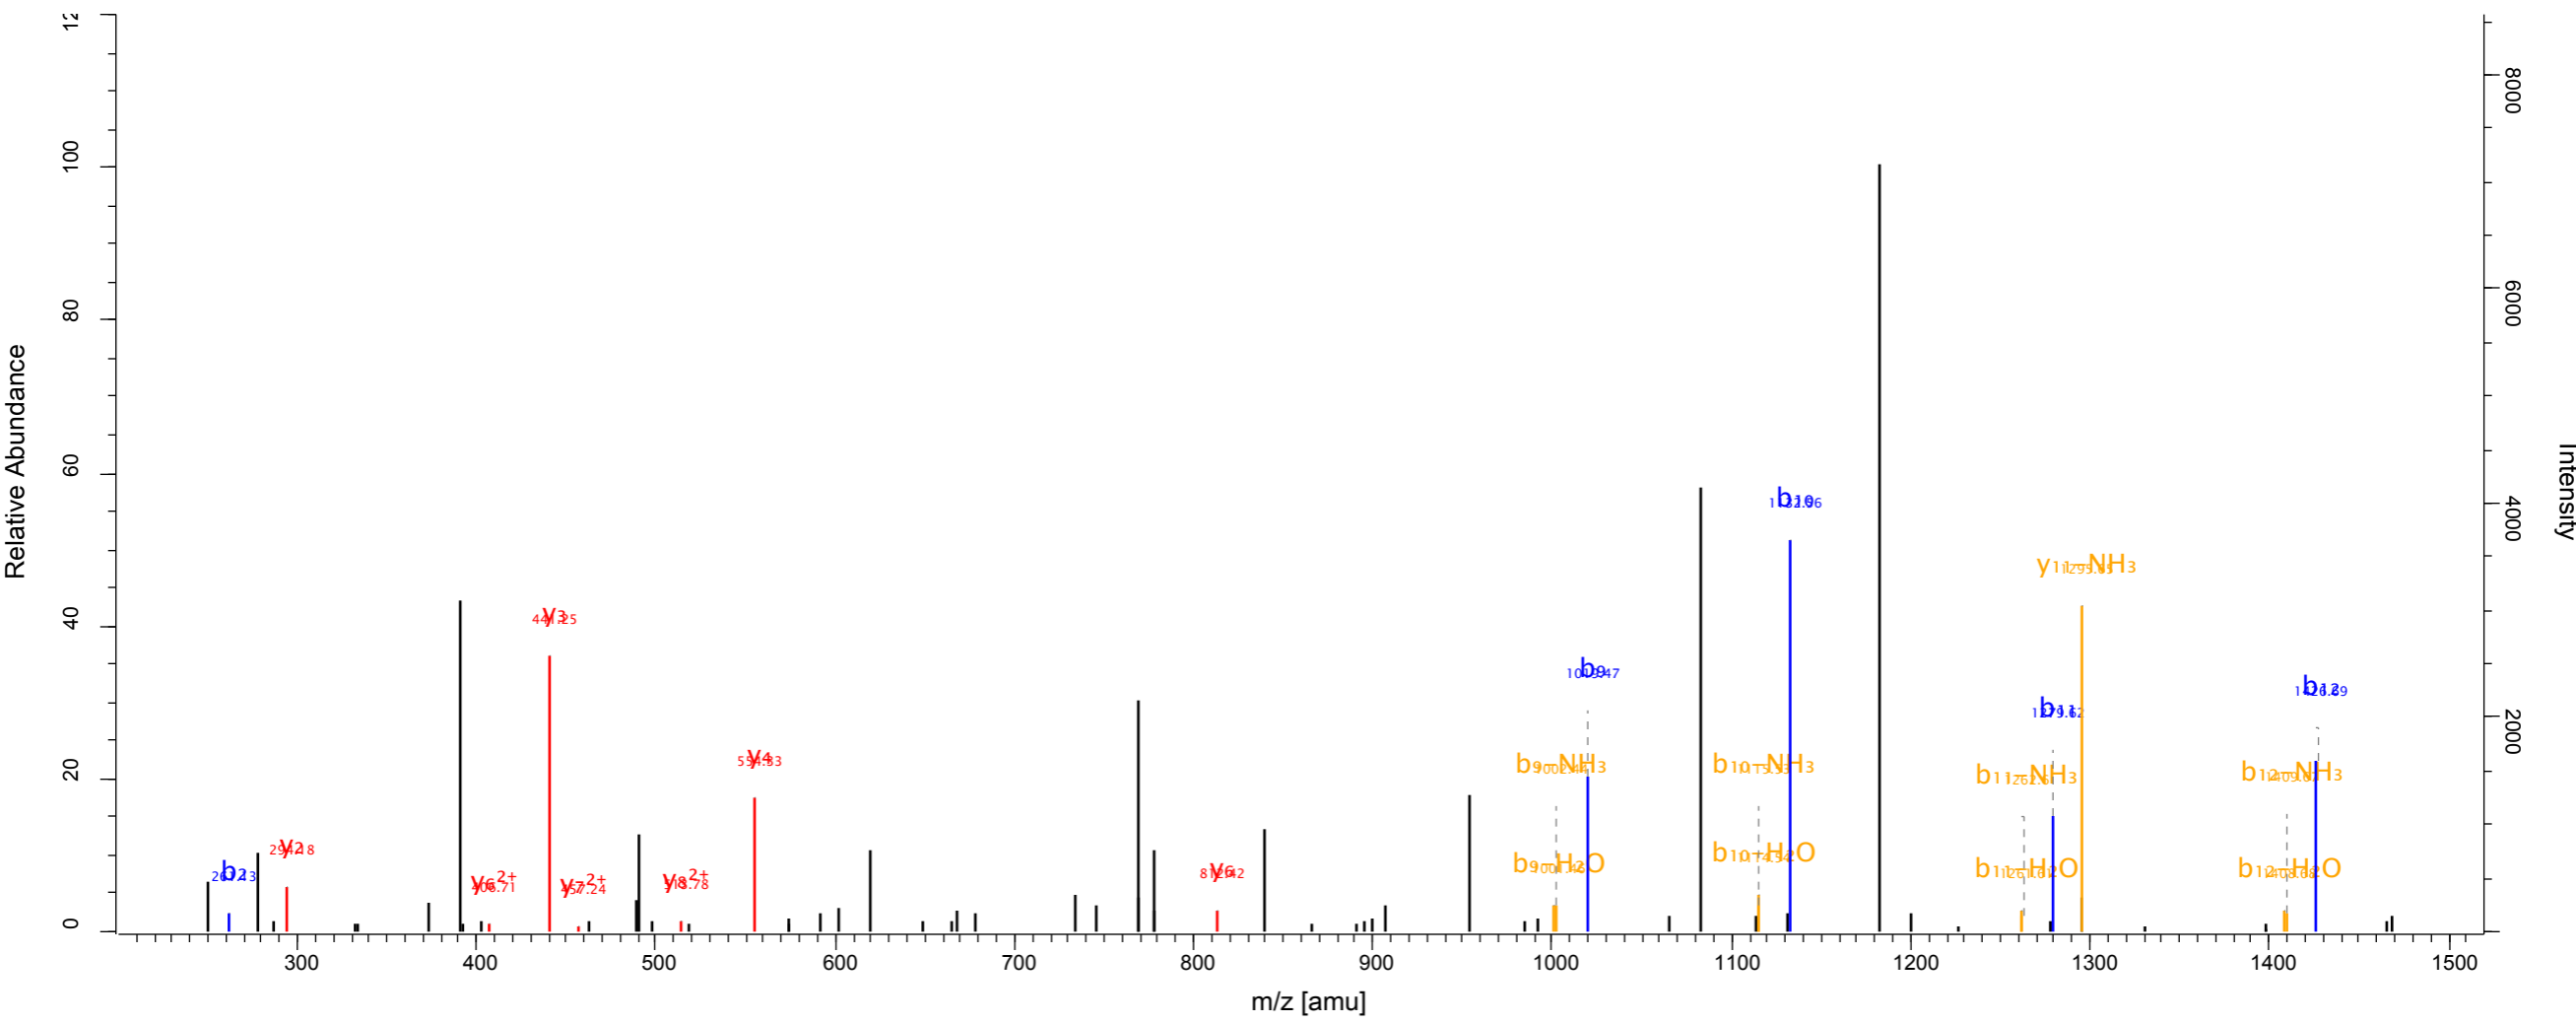

precursor information

|                   |                  |
|-------------------|------------------|
| Mass:             | 1571.78076       |
| m/z:              | 786.00216        |
| Charge:           | 2+               |
| Retention time:   | 06.4166412353516 |
| Score:            | 115.2865         |
| Mass Error (ppm): | -0.49026         |
| PEP:              | 2.8778E-05       |
| Precursor Type:   | MULTI            |

general information

|                       |             |
|-----------------------|-------------|
| Annotation:           | 0 of 13     |
| AminoAcids Coverage:  | 60%         |
| Intensity Coverage:   | 38%         |
| Peak Coverage:        | 20%         |
| Protein Localisation: | 559 ... 571 |

| b ion      |                |    |     |    | y ion          |            | y <sup>2+</sup> ion |            |
|------------|----------------|----|-----|----|----------------|------------|---------------------|------------|
| Δ dalton   | mass           |    | seq |    | Δ dalton       | mass       | Δ dalton            | mass       |
|            | 114.091340447  | 1  | I   | 12 |                |            |                     |            |
| +0.0187681 | 261.126739675  | 2  | M   | 11 | 1459.713743568 |            | 1459.713743568      |            |
|            | 375.169667122  | 3  | N   | 10 | 1312.678344339 |            | 1312.678344339      |            |
|            | 446.20678091   | 4  | A   | 9  | 1198.635416892 |            | 1198.635416892      |            |
|            | 547.254459384  | 5  | T   | 8  | 1127.598303104 |            | 1127.598303104      |            |
|            | 660.338523365  | 6  | I   | 7  | 1026.55062463  |            | 513.778950548       | -0.2892045 |
|            | 761.386201839  | 7  | T   | 6  | 913.46656065   |            | 457.236918558       | +0.1136674 |
|            | 890.428794935  | 8  | E   | 5  | 812.418882176  | +0.2717306 | 406.713079321       | -0.2210749 |
| -0.2728407 | 1019.471388031 | 9  | E   | 4  | 683.37628908   |            | 683.37628908        |            |
| -0.1354081 | 1132.55452012  | 10 | I   | 3  | 554.333695983  | +0.0095047 | 554.333695983       |            |
| -0.216029  | 1279.623865928 | 11 | F   | 2  | 441.249632003  | +0.0224627 | 441.249632003       |            |
| -0.3313179 | 1426.692279844 | 12 | F   | 1  | 294.181218087  | +0.1260634 | 294.181218087       |            |
|            |                | 13 | K   | 0  | 147.112804171  |            | 147.112804171       |            |

Scan number 16333 Raw file 20081010\_Orbi7\_SaZa\_SA\_ADH\_Exp\_3\_Laminin\_24h\_InGel\_10  
 Method ITMS; CID Genenames SUFU

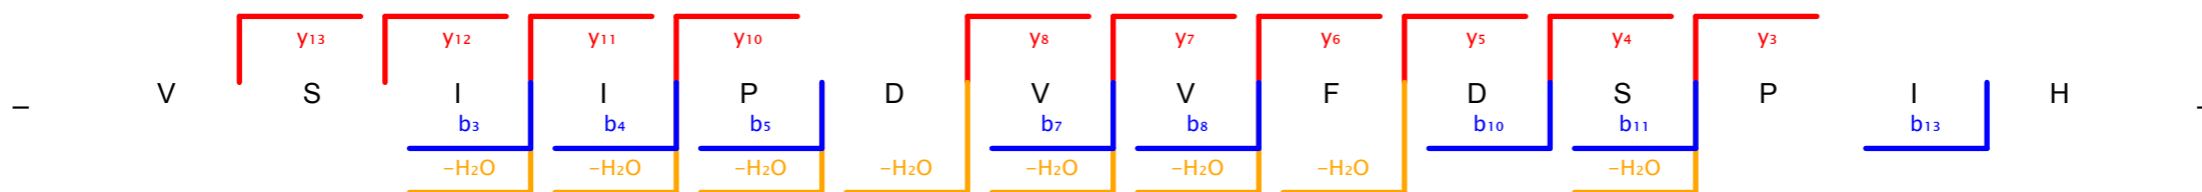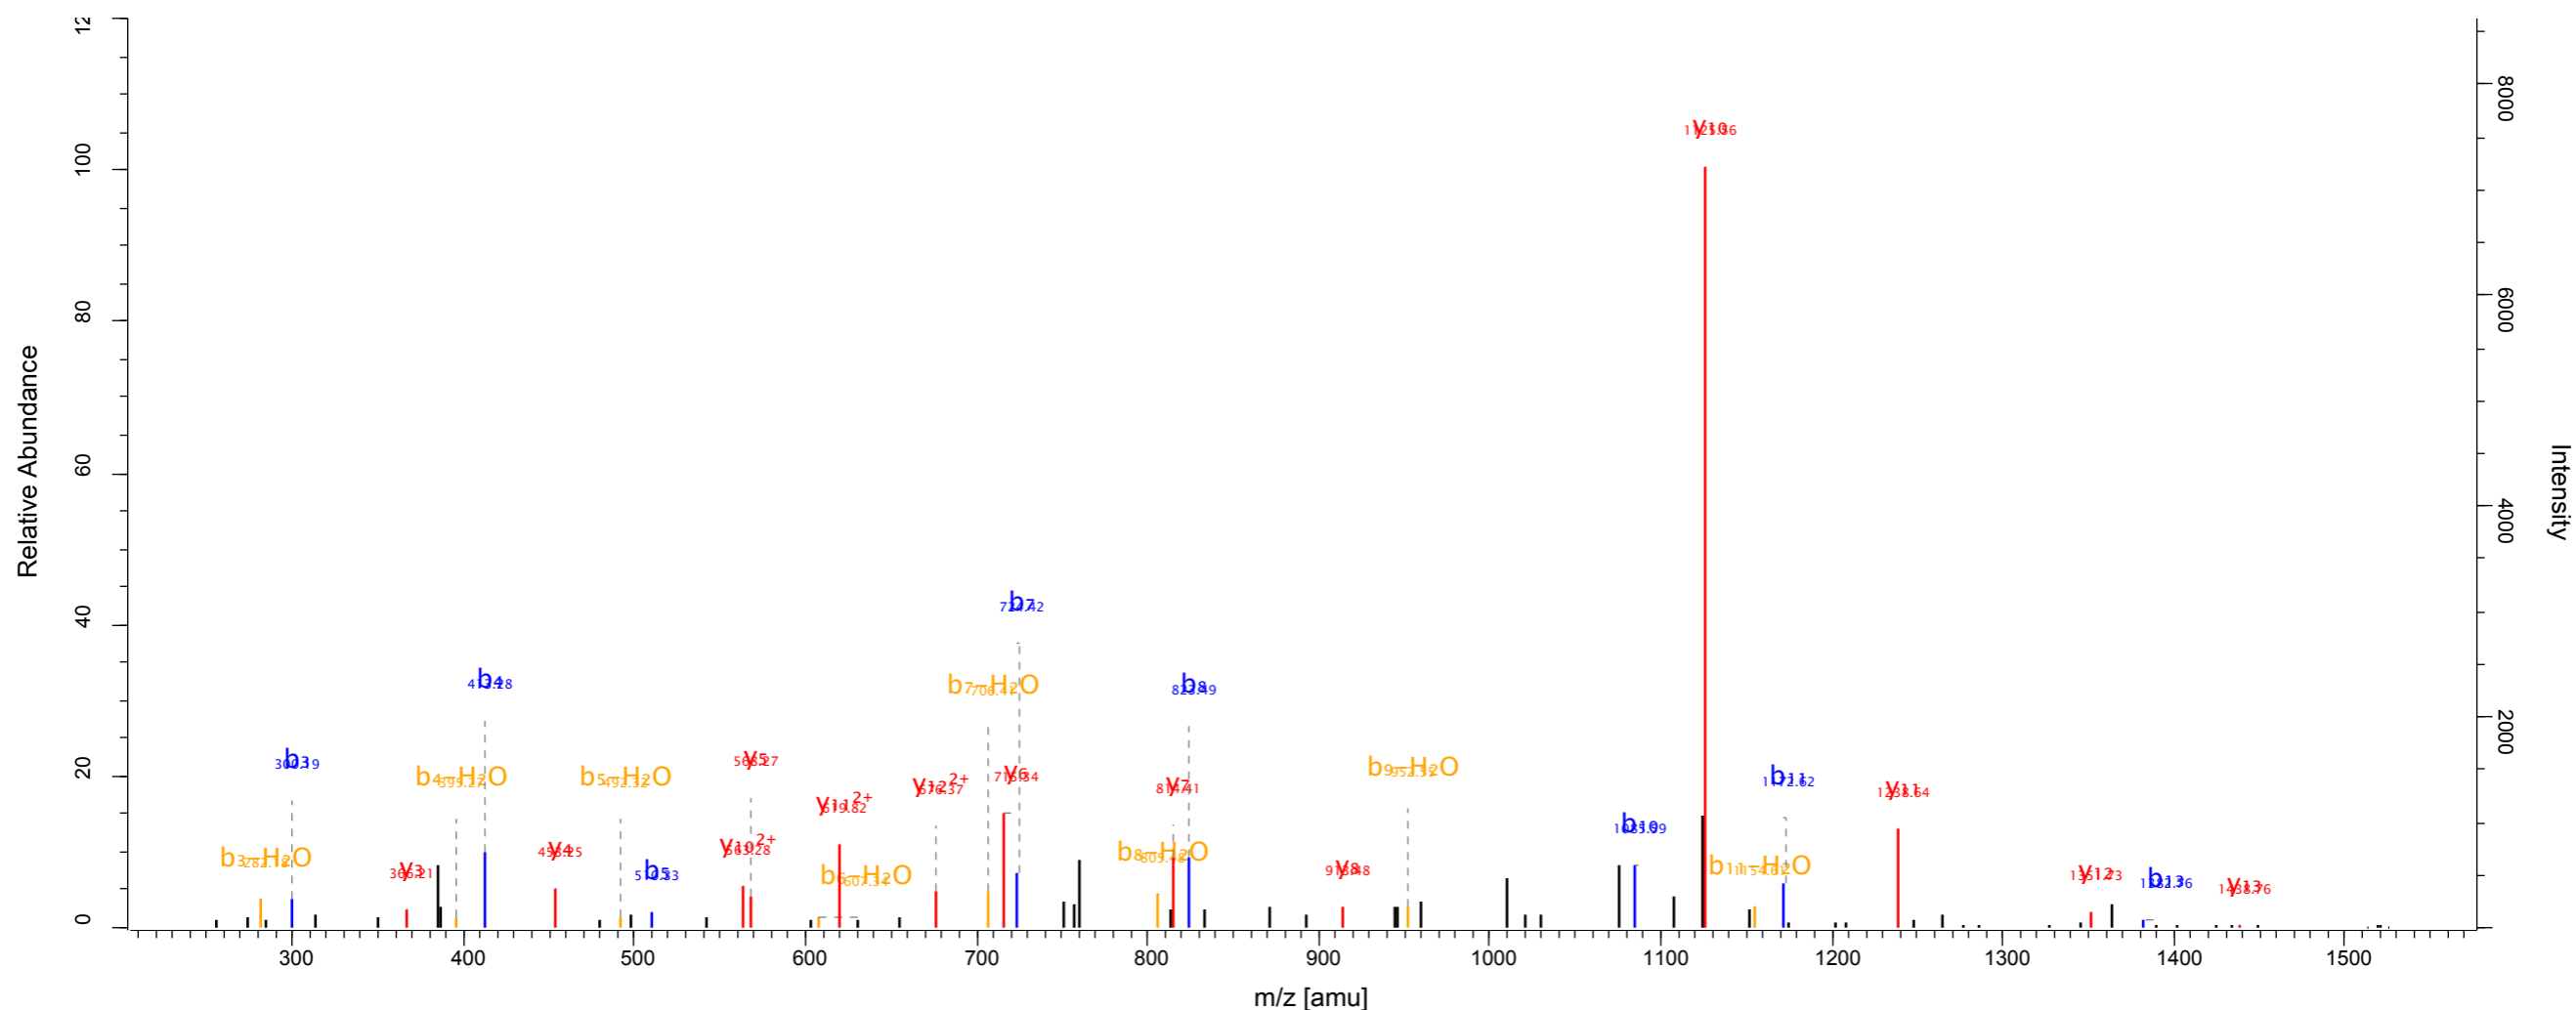

precursor information

|                   |                  |
|-------------------|------------------|
| Mass:             | 1526.81822       |
| m/z:              | 760.41620        |
| Charge:           | 2+               |
| Potenttime:       | 111.107727050781 |
| Score:            | 100.0750         |
| Mass Error [ppm]: | 0.27218          |
| PEP:              | 1.6507516        |
| Precursor Type:   | ISO              |

general information

|                       |             |
|-----------------------|-------------|
| Annotation:           | 12 of 14    |
| AminoAcids Coverage:  | 86%         |
| Intensity Coverage:   | 60%         |
| Peak Coverage:        | 27%         |
| Protein Localisation: | 471 ... 484 |

| b ion      |                |    |     |    | y ion          |            | y <sup>2+</sup> ion |            |
|------------|----------------|----|-----|----|----------------|------------|---------------------|------------|
| Δ dalton   | mass           |    | seq |    | Δ dalton       | mass       | Δ dalton            | mass       |
|            | 100.075690383  | 1  | V   | 13 |                |            |                     |            |
|            | 187.107718793  | 2  | S   | 12 | 1438.757657293 | +0.3064296 | 1438.757657293      |            |
| -0.2719525 | 300.191782773  | 3  | I   | 11 | 1351.725628883 | -0.3082705 | 676.366452675       | +0.0054345 |
| -0.1735518 | 413.275846754  | 4  | I   | 10 | 1238.641564903 | -0.0330444 | 619.824420685       | -0.0217473 |
| -0.1599094 | 510.328610606  | 5  | P   | 9  | 1125.557500922 | +0.0386905 | 563.282388694       | +0.0696011 |
|            | 625.355553638  | 6  | D   | 8  | 1028.50473707  |            | 1028.50473707       |            |
| -0.1824514 | 724.423967554  | 7  | V   | 7  | 913.477794038  | -0.0757555 | 913.477794038       |            |
| -0.109569  | 823.49238147   | 8  | V   | 6  | 814.409380122  | -0.0035574 | 814.409380122       |            |
|            | 970.560795386  | 9  | F   | 5  | 715.340966206  | +0.0015021 | 715.340966206       |            |
| -0.2356876 | 1085.587738418 | 10 | D   | 4  | 568.27255229   | +0.082123  | 568.27255229        |            |
| -0.3043371 | 1172.619766828 | 11 | S   | 3  | 453.245609258  | +0.1080895 | 453.245609258       |            |
|            | 1269.67253068  | 12 | P   | 2  | 366.213580848  | -0.0330999 | 366.213580848       |            |
| -0.4200468 | 1382.75659466  | 13 | I   | 1  | 269.160816996  |            | 269.160816996       |            |
|            |                | 14 | H   | 0  | 156.076753015  |            | 156.076753015       |            |

Scan number 15404 Raw file 20081015\_Orbi6\_SaZa\_SA\_ADH\_Exp\_1\_Susp\_InGel\_16b  
 Method ITMS; CID Genenames NOXIN

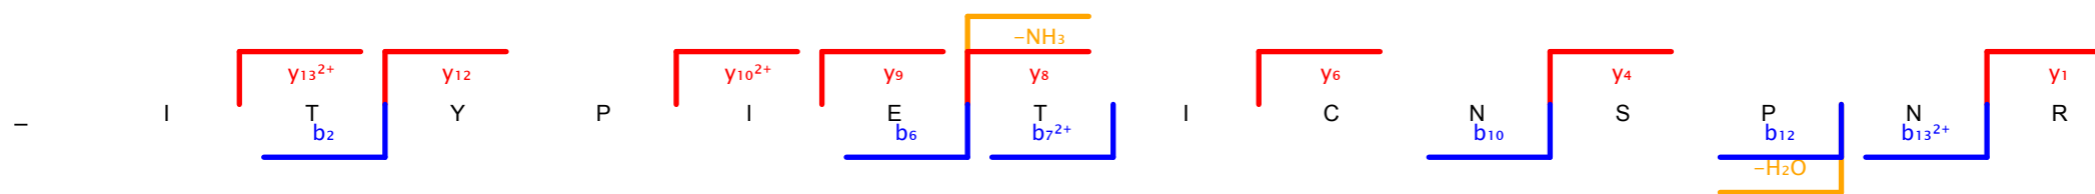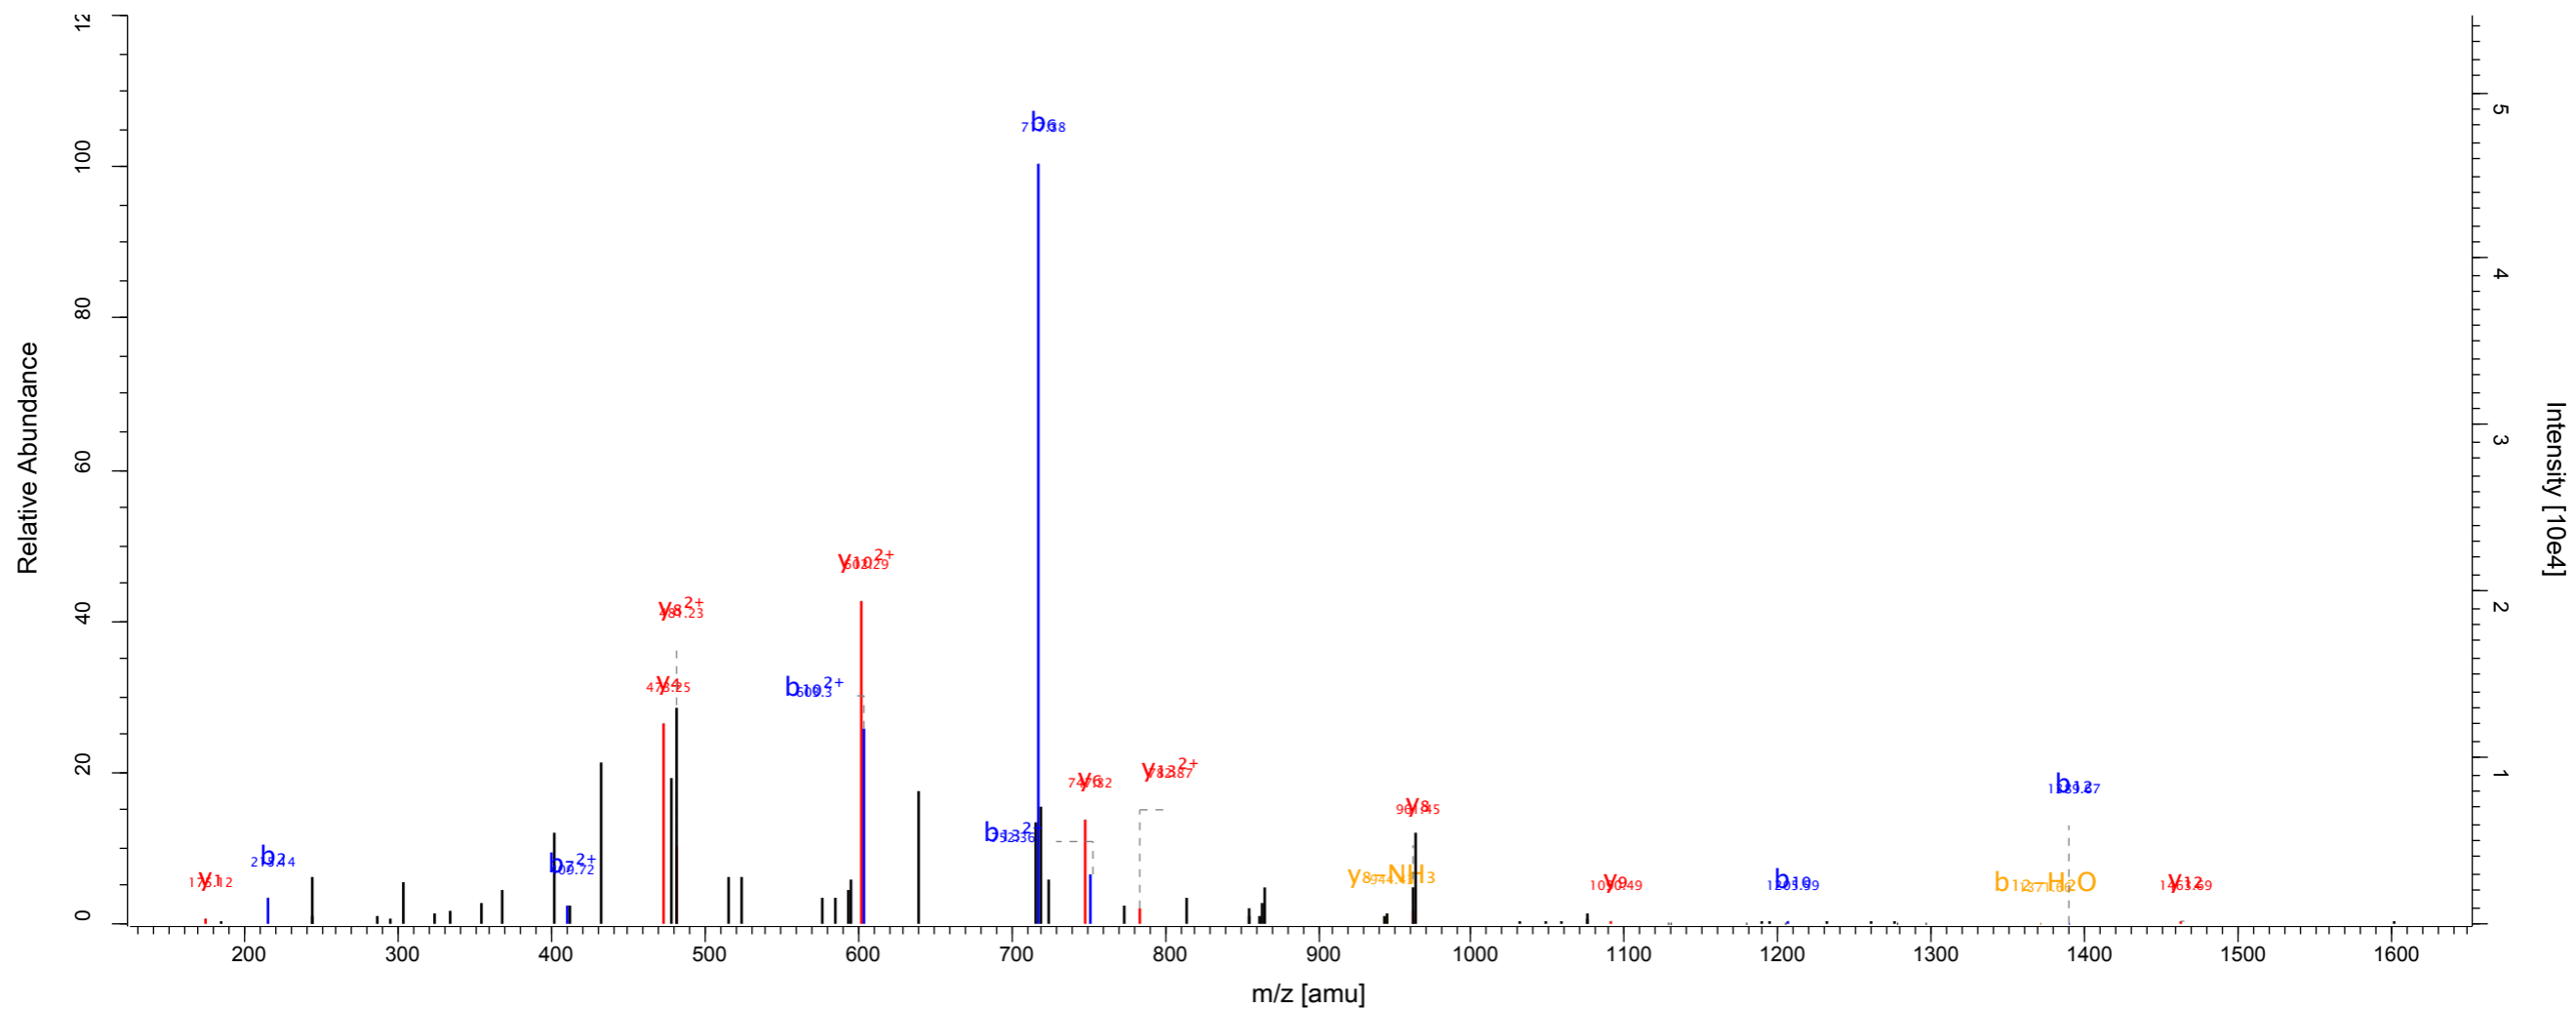

precursor information

|                   |                 |
|-------------------|-----------------|
| Mass:             | 1676.81777      |
| m/z:              | 550.0652        |
| Charge:           | 2+              |
| Potentiation:     | 00.542815612702 |
| Score:            | 101.8882        |
| Mass Error [ppm]: | 0.85262         |
| PEP:              | 0.00022282      |
| Precursor Type:   | MULTI           |

general information

|                       |             |
|-----------------------|-------------|
| Annotation:           | 11 of 14    |
| AminoAcids Coverage:  | 70.0%       |
| Intensity Coverage:   | 51.0%       |
| Peak Coverage:        | 25.0%       |
| Protein Localisation: | 631 ... 644 |

| b <sup>2+</sup> ion |              | b ion      |              |    |     |    | y ion        |            | y <sup>2+</sup> ion |            |
|---------------------|--------------|------------|--------------|----|-----|----|--------------|------------|---------------------|------------|
| Δ dalton            | mass         | Δ dalton   | mass         |    | seq |    | Δ dalton     | mass       | Δ dalton            | mass       |
|                     | 114.09134045 |            | 114.09134045 | 1  | I   | 13 |              |            |                     |            |
|                     | 215.13901892 | +0.0180856 | 215.13901892 | 2  | T   | 12 | 1564.7424179 |            | 782.8748472         | +0.1405947 |
|                     | 378.20234746 |            | 378.20234746 | 3  | Y   | 11 | 1463.6947395 | -0.325843  | 1463.6947395        |            |
|                     | 475.25511131 |            | 475.25511131 | 4  | P   | 10 | 1300.6314109 |            | 1300.6314109        |            |
|                     | 588.33917529 |            | 588.33917529 | 5  | I   | 9  | 1203.5786471 |            | 602.29296177        | +0.0735543 |
|                     | 717.38176839 | +0.2600773 | 717.38176839 | 6  | E   | 8  | 1090.4945831 | +0.1882782 | 1090.4945831        |            |
| +0.4778053          | 409.71836166 |            | 818.42944686 | 7  | T   | 7  | 961.45198999 | -0.1243533 | 481.22963323        | +0.1661798 |
|                     | 931.51351084 |            | 931.51351084 | 8  | I   | 6  | 860.40431152 |            | 860.40431152        |            |
|                     | 1091.544159  |            | 1091.544159  | 9  | C   | 5  | 747.32024754 | -0.0954551 | 747.32024754        |            |
| +0.1369616          | 603.29718148 | +0.0442612 | 1205.5870865 | 10 | N   | 4  | 587.28959934 |            | 587.28959934        |            |
|                     | 1292.6191149 |            | 1292.6191149 | 11 | S   | 3  | 473.24667189 | +0.0285356 | 473.24667189        |            |
|                     | 1389.6718788 | -0.203495  | 1389.6718788 | 12 | P   | 2  | 386.21464348 |            | 386.21464348        |            |
| -0.1875184          | 752.36104133 |            | 1503.7148062 | 13 | N   | 1  | 289.16187963 |            | 289.16187963        |            |
|                     |              |            |              | 14 | R   | 0  | 175.11895218 | -0.0156807 | 175.11895218        |            |



Scan number 3764 Raw file 20081127\_Orbi7\_SaZa\_SA\_ADH\_MatrigelGFR\_Exp\_2\_InGel\_16  
 Method ITMS; CID Genenames TSPAN10

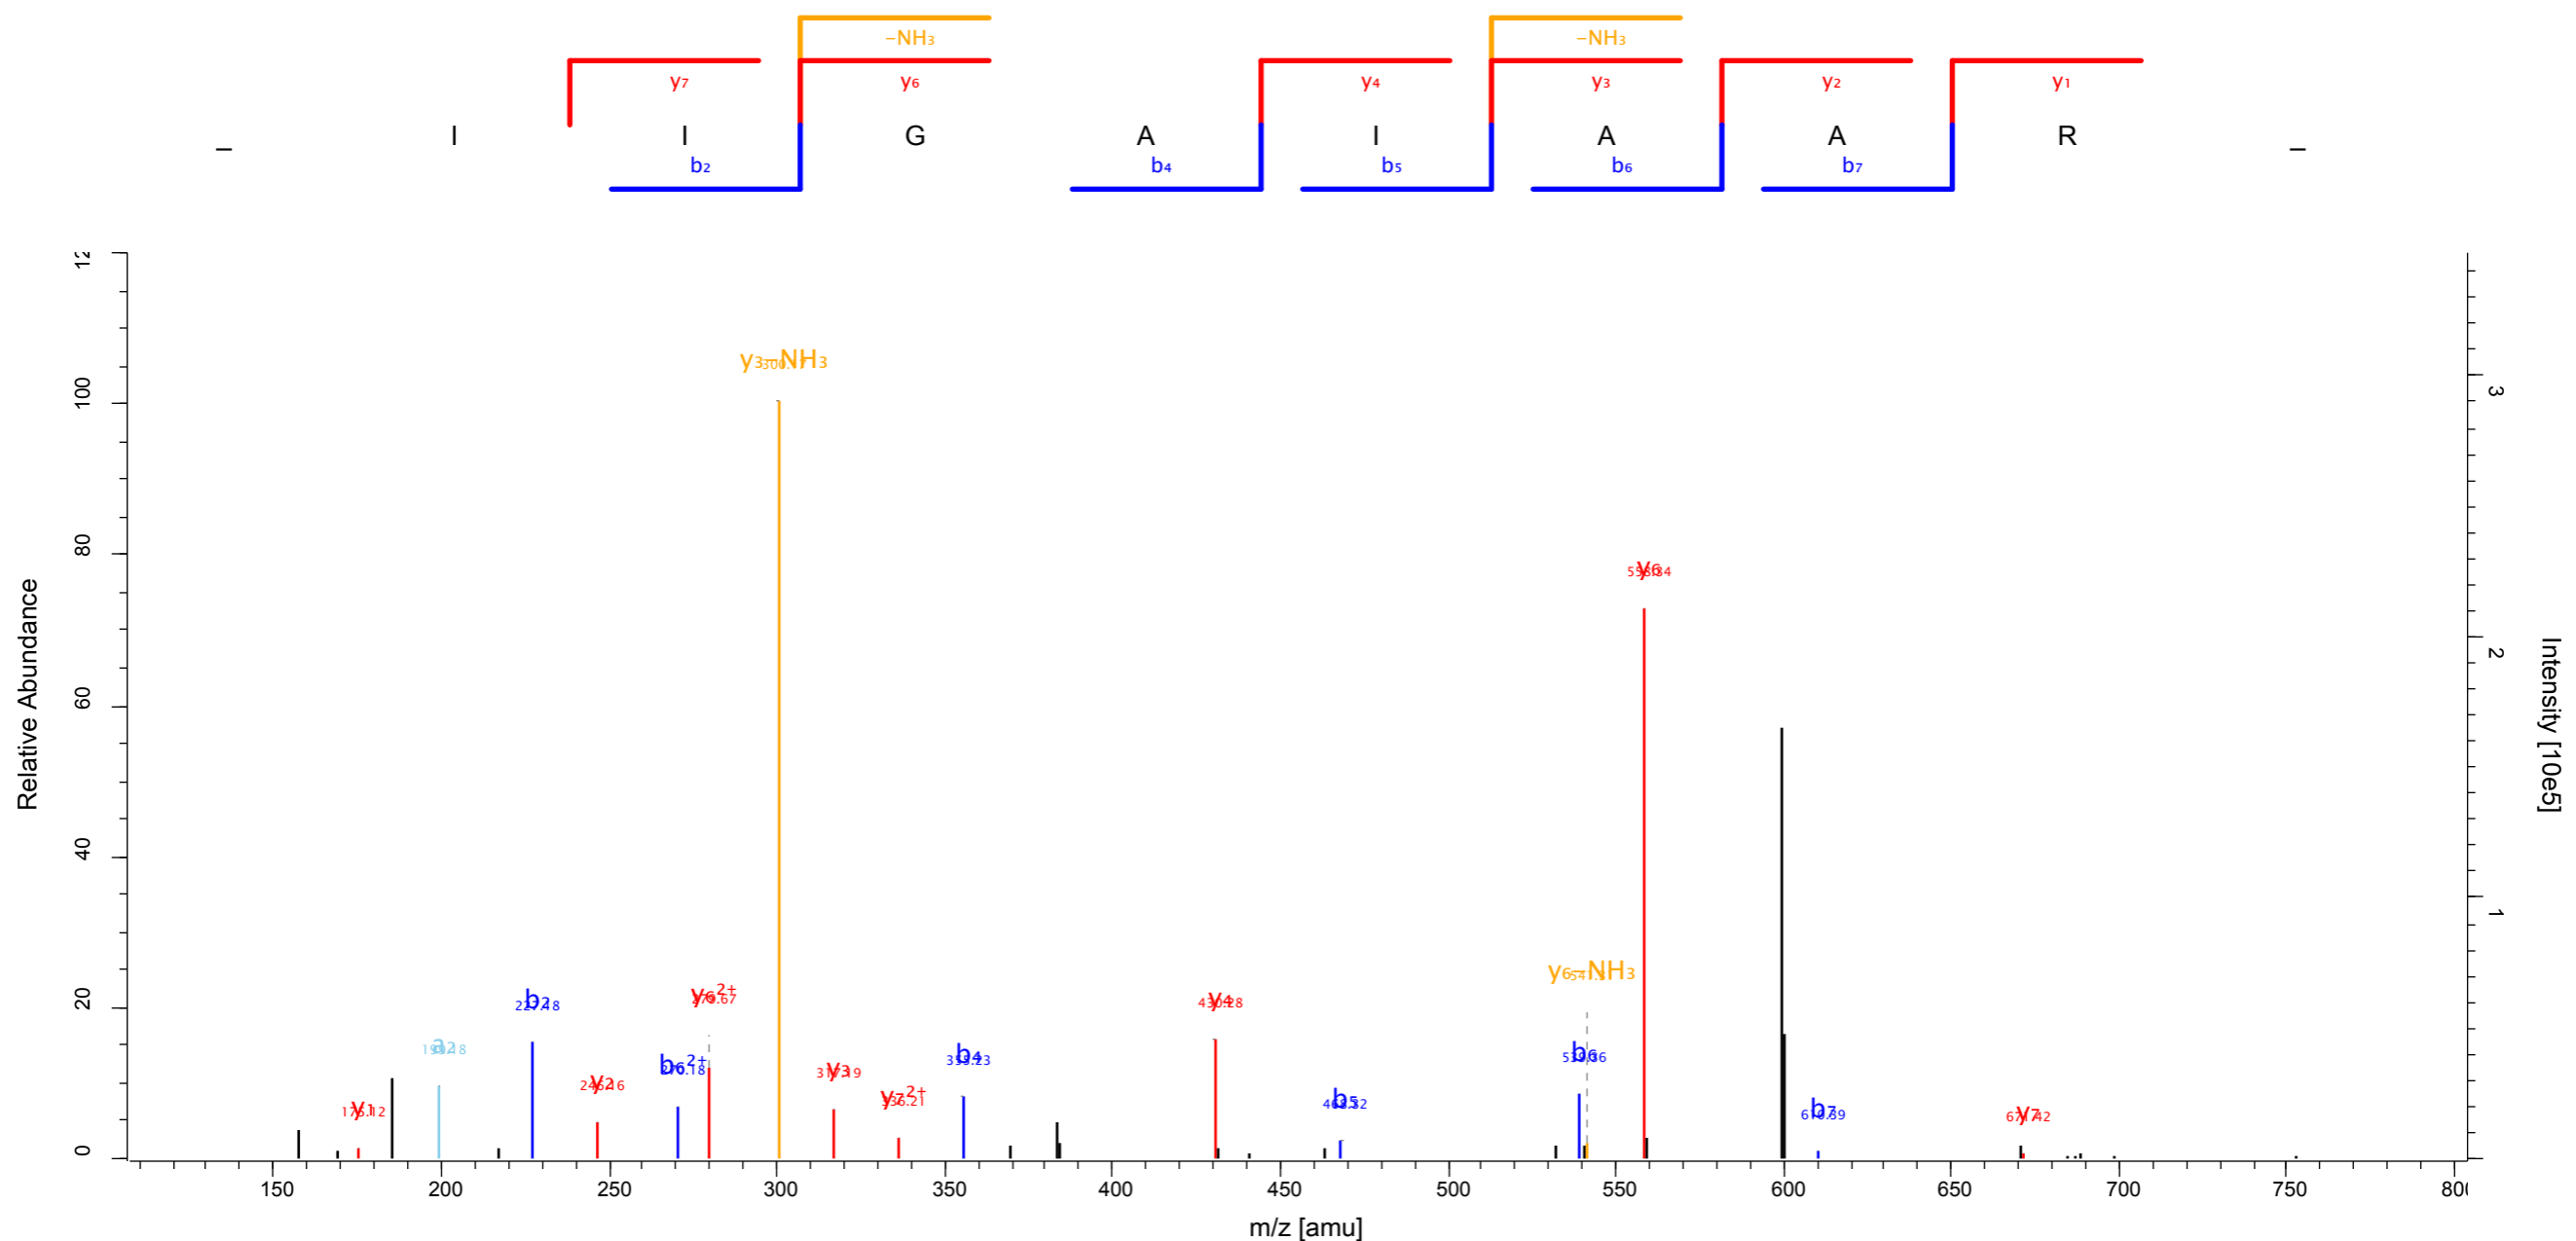

precursor information

|                       |                  |
|-----------------------|------------------|
| Mass:                 | 782.1064         |
| m/z:                  | 302.75548        |
| Charge:               | 2+               |
| Retention time:       | 41.1161103847656 |
| Score:                | 167.2520         |
| Mass Error [ppm]:     | -0.34075         |
| DEP:                  | 0.00028008       |
| Annotation:           | 7 of 8           |
| AminoAcids Coverage:  | 88 %             |
| Intensity Coverage:   | 71 %             |
| Peak Coverage:        | 45 %             |
| Protein Localisation: | 315 ... 322      |

| a ion     |            | b <sup>2+</sup> ion |            | b ion      |            |   |     |   | y ion      |            | y <sup>2+</sup> ion |            |
|-----------|------------|---------------------|------------|------------|------------|---|-----|---|------------|------------|---------------------|------------|
| Δ dalton  | mass       | Δ dalton            | mass       | Δ dalton   | mass       |   | seq |   | Δ dalton   | mass       | Δ dalton            | mass       |
|           | 86.0964258 |                     | 114.09134  |            | 114.09134  | 1 | I   | 7 |            |            |                     |            |
| +0.056113 | 199.18049  |                     | 227.175404 | -0.0146989 | 227.175404 | 2 | I   | 6 | 671.419885 | -0.0151611 | 336.213581          | -0.21294   |
|           | 256.201954 |                     | 284.196868 |            | 284.196868 | 3 | G   | 5 | 558.335821 | +0.0215396 | 279.671549          | +0.0063686 |
|           | 327.239067 |                     | 355.233982 | +0.0212366 | 355.233982 | 4 | A   | 4 | 501.314358 |            | 501.314358          |            |
|           | 440.323131 |                     | 468.318046 | -0.1679605 | 468.318046 | 5 | I   | 3 | 430.277244 | +0.0571374 | 430.277244          |            |
|           | 511.360245 | +0.4982863          | 270.181218 | -0.0530357 | 539.35516  | 6 | A   | 2 | 317.19318  | +0.0589565 | 317.19318           |            |
|           | 582.397359 |                     | 610.392273 | -0.1643682 | 610.392273 | 7 | A   | 1 | 246.156066 | +0.0569467 | 246.156066          |            |
|           |            |                     |            |            |            | 8 | R   | 0 | 175.118952 | +0.1007439 | 175.118952          |            |

Scan number 15411 Raw file 20081206\_Orbi7\_SaZa\_ADH\_FN\_Exp\_1\_InGel\_01  
 Method ITMS; CID Genenames SCOC

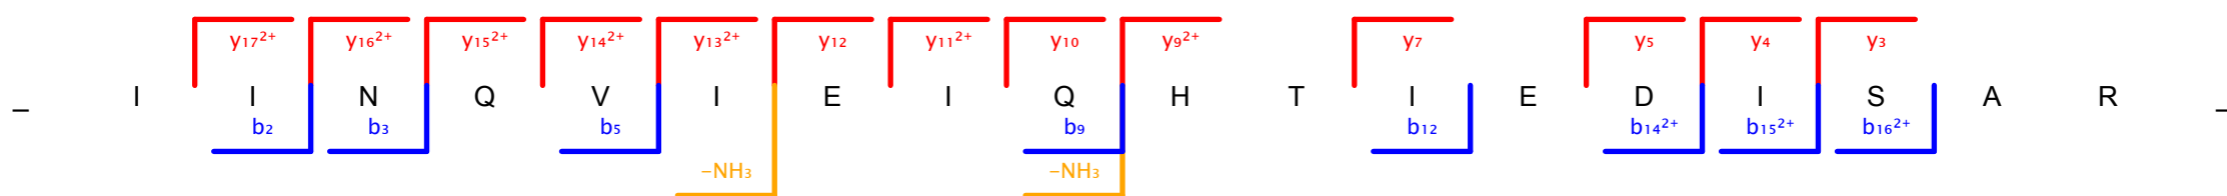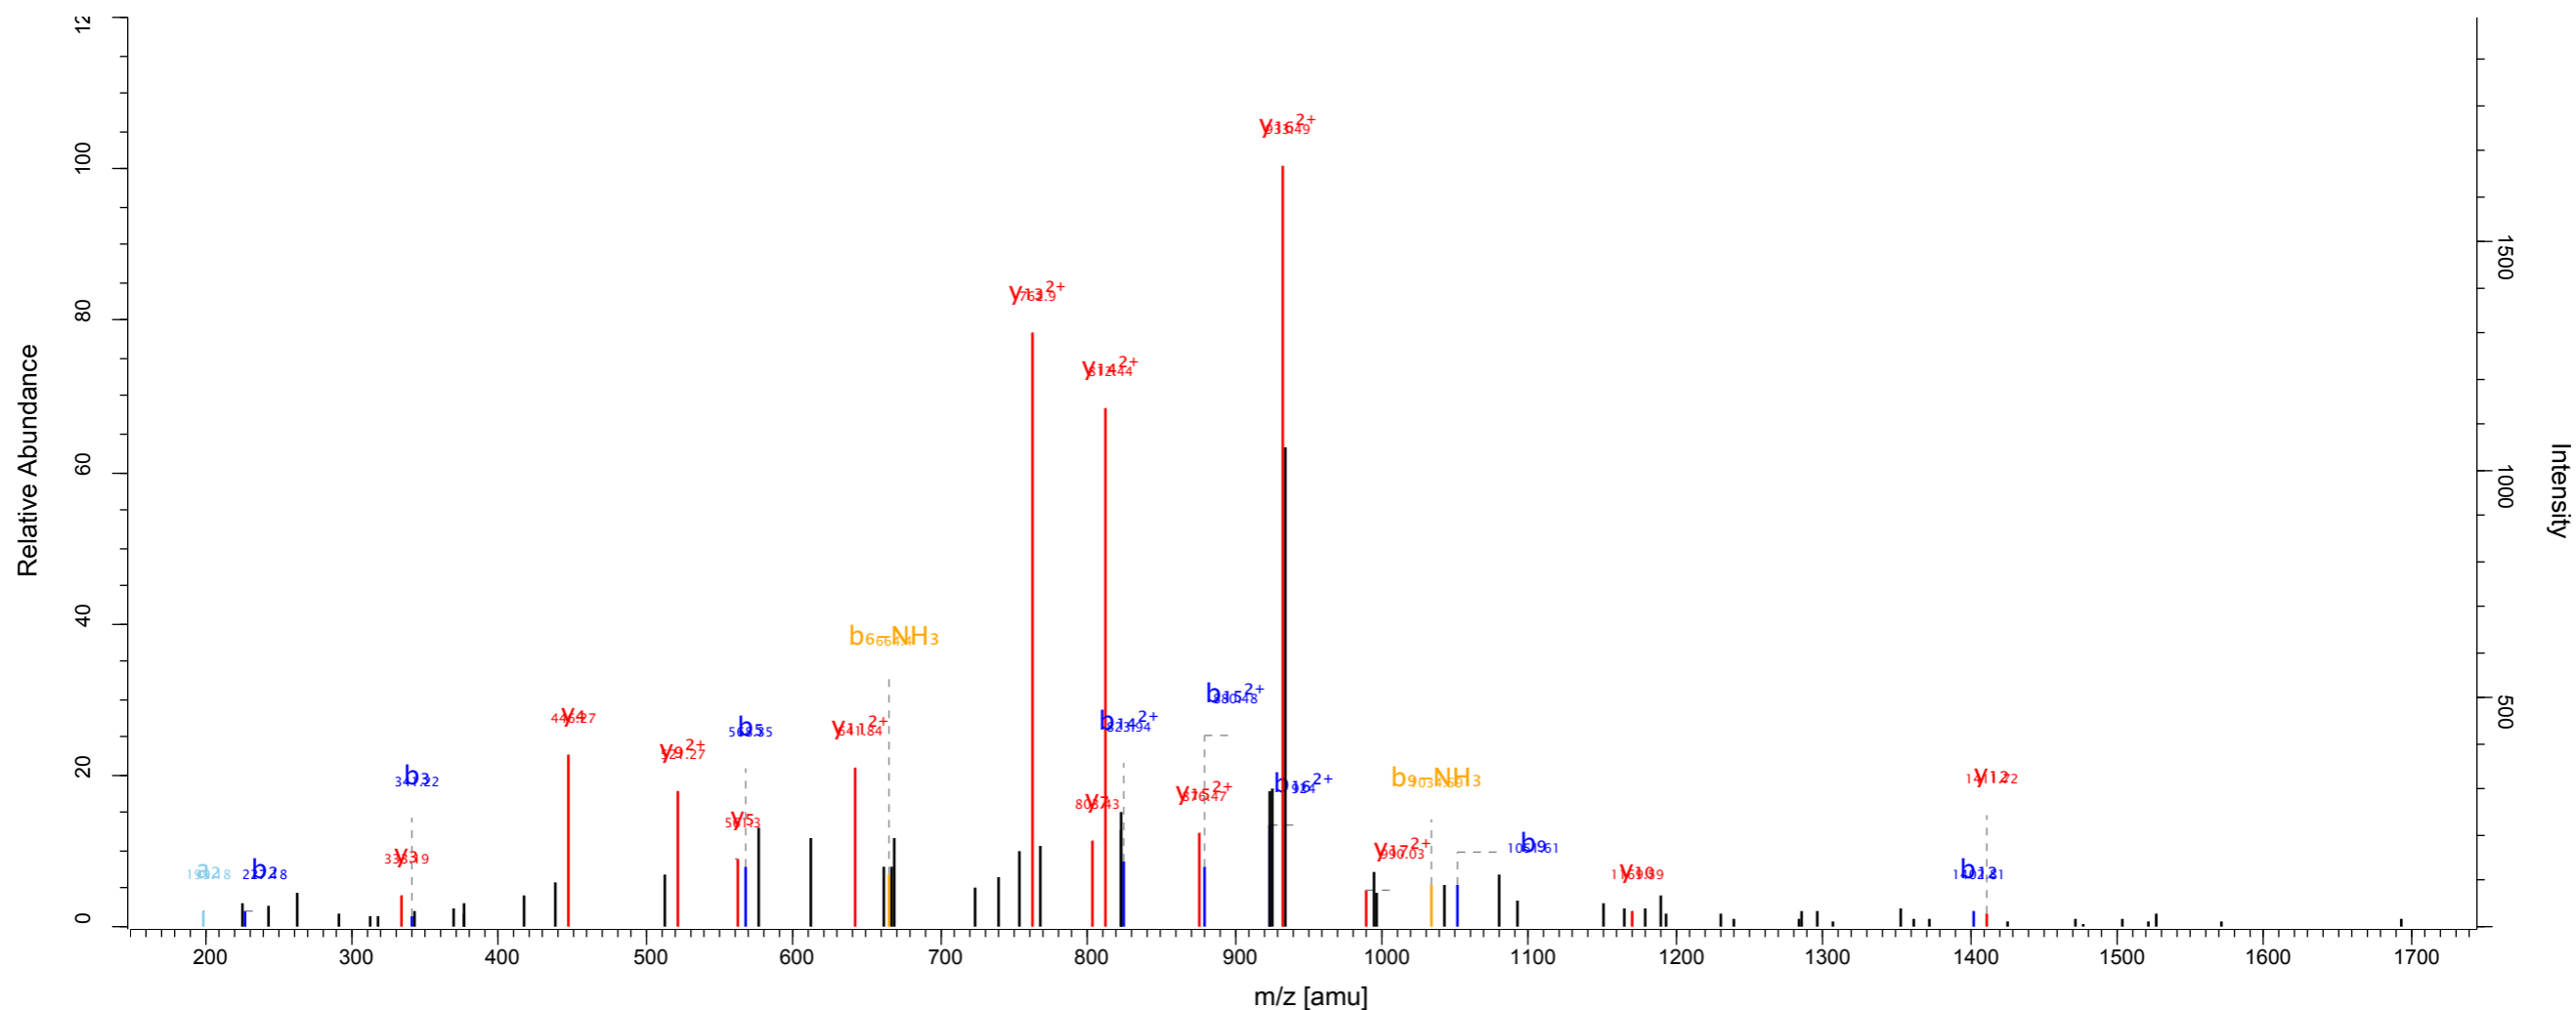

precursor information

|                   |                  |
|-------------------|------------------|
| Mass:             | 2001.12182       |
| m/z:              | 608.05122        |
| Charge:           | 2+               |
| Potenttime:       | 118.562011427088 |
| Score:            | 114.2008         |
| Mass Error (ppm): | 0.27028          |
| DEP:              | 1.206506         |
| Precursor Type:   | MULTI            |

| a ion     |            | b <sup>2+</sup> ion |            | b ion      |            |    |     |    | y ion      |            | y <sup>2+</sup> ion |            |
|-----------|------------|---------------------|------------|------------|------------|----|-----|----|------------|------------|---------------------|------------|
| Δ dalton  | mass       | Δ dalton            | mass       | Δ dalton   | mass       |    | seq |    | Δ dalton   | mass       | Δ dalton            | mass       |
|           | 86.0964258 |                     | 114.09134  |            | 114.09134  | 1  | I   | 17 |            |            |                     |            |
| +0.007468 | 199.18049  |                     | 227.175404 | -0.0378617 | 227.175404 | 2  | I   | 16 | 1979.05563 |            | 990.031453          | -0.0876057 |
|           | 313.223417 |                     | 341.218332 | -0.1624237 | 341.218332 | 3  | N   | 15 | 1865.97157 |            | 933.489421          | +0.0345044 |
|           | 441.281995 |                     | 469.276909 |            | 469.276909 | 4  | Q   | 14 | 1751.92864 |            | 876.467958          | +0.1367177 |
|           | 540.350409 |                     | 568.345323 | +0.1017592 | 568.345323 | 5  | V   | 13 | 1623.87006 |            | 812.438669          | +0.2640899 |
|           | 653.434473 |                     | 681.429387 |            | 681.429387 | 6  | I   | 12 | 1524.80165 |            | 762.904462          | +0.2340268 |
|           | 782.477066 |                     | 810.47198  |            | 810.47198  | 7  | E   | 11 | 1411.71758 | +0.3198922 | 1411.71758          |            |
|           | 895.56113  |                     | 923.556044 |            | 923.556044 | 8  | I   | 10 | 1282.67499 |            | 641.841133          | +0.0559613 |
|           | 1023.61971 |                     | 1051.61462 | -0.1263406 | 1051.61462 | 9  | Q   | 9  | 1169.59093 | -0.083358  | 1169.59093          |            |
|           | 1160.67862 |                     | 1188.67353 |            | 1188.67353 | 10 | H   | 8  | 1041.53235 |            | 521.269813          | +0.0840082 |
|           | 1261.7263  |                     | 1289.72121 |            | 1289.72121 | 11 | T   | 7  | 904.473437 |            | 904.473437          |            |
|           | 1374.81036 |                     | 1402.80528 | +0.0178439 | 1402.80528 | 12 | I   | 6  | 803.425758 | +0.0254744 | 803.425758          |            |
|           | 1503.85295 |                     | 1531.84787 |            | 1531.84787 | 13 | E   | 5  | 690.341694 |            | 690.341694          |            |
|           | 1618.8799  | +0.3168291          | 823.941044 |            | 1646.87481 | 14 | D   | 4  | 561.299101 | +0.1166091 | 561.299101          |            |
|           | 1731.96396 | -0.1408523          | 880.483076 |            | 1759.95888 | 15 | I   | 3  | 446.272158 | +0.0763524 | 446.272158          |            |
|           | 1818.99599 | -0.1583313          | 923.999091 |            | 1846.9909  | 16 | S   | 2  | 333.188094 | +0.0583351 | 333.188094          |            |
|           | 1890.0331  |                     | 1918.02802 |            | 1918.02802 | 17 | A   | 1  | 246.156066 |            | 246.156066          |            |
|           |            |                     |            |            |            | 18 | R   | 0  | 175.118952 |            | 175.118952          |            |

general information

|                       |             |
|-----------------------|-------------|
| Annotation:           | 12 of 18    |
| AminoAcids Coverage:  | 72%         |
| Intensity Coverage:   | 57%         |
| Peak Coverage:        | 21%         |
| Protein Localisation: | 100 ... 117 |

Scan number 14959 Raw file 20081206\_Orbi7\_SaZa\_ADH\_FN\_Exp\_1\_InGel\_03  
 Method ITMS; CID Genenames NKIRAS1

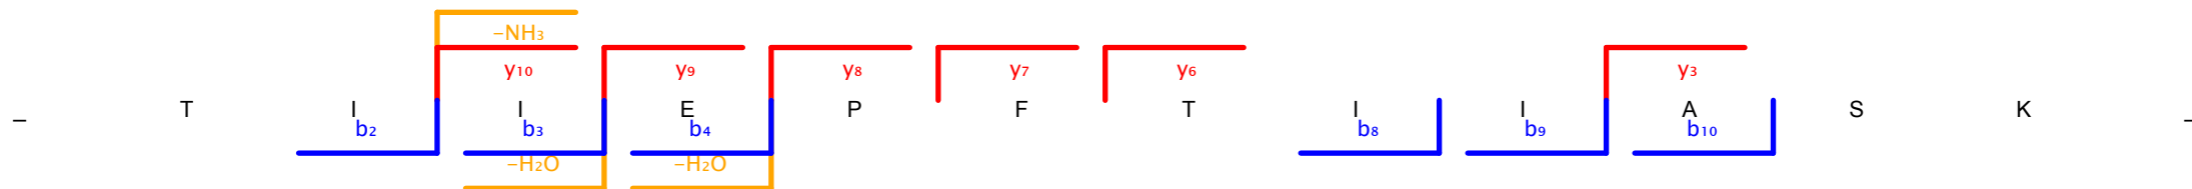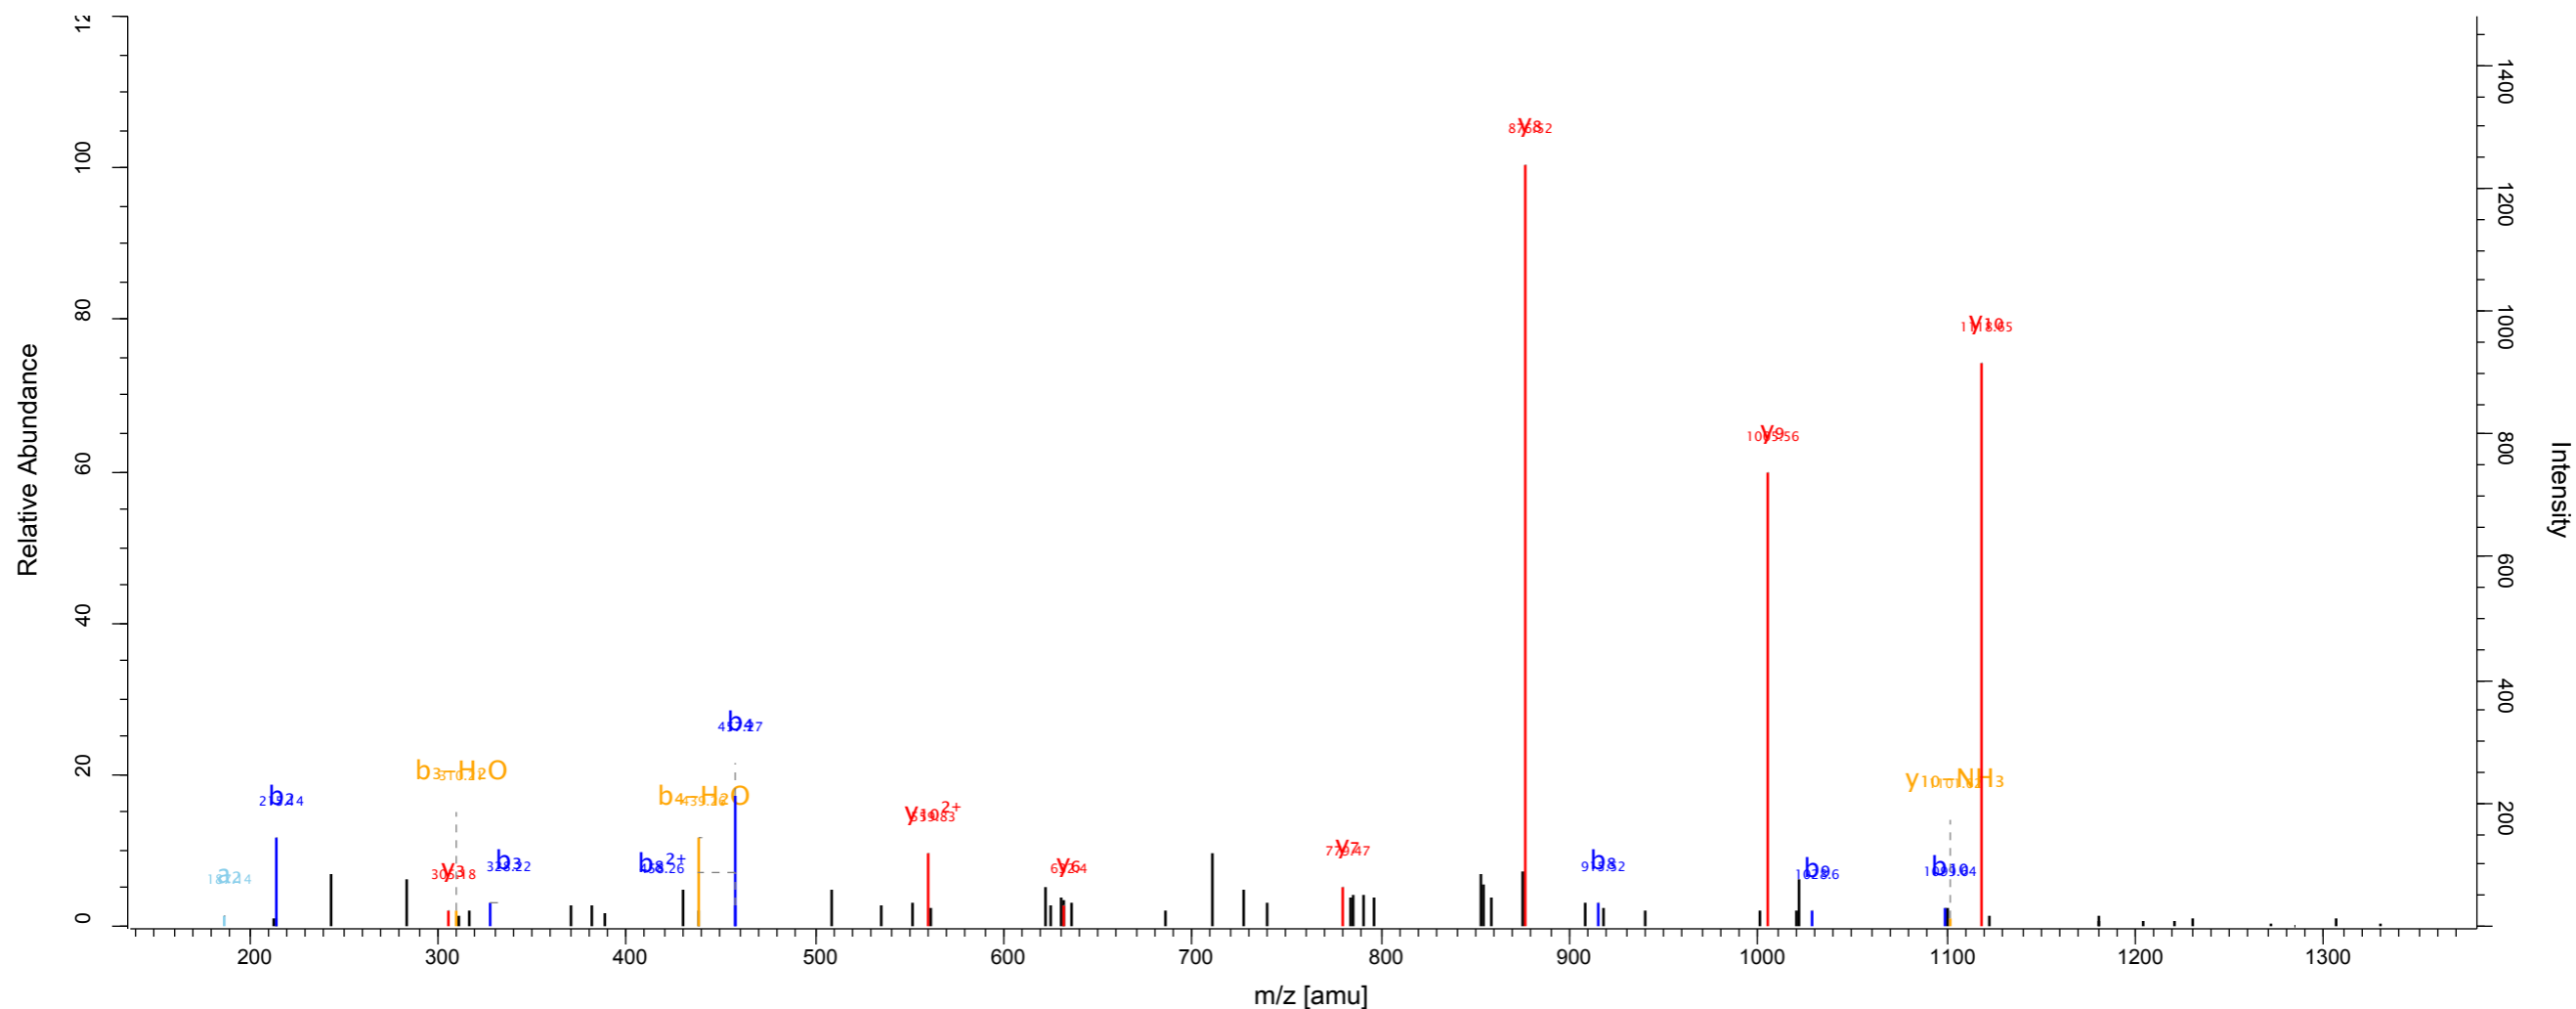

precursor information

|                   |                  |
|-------------------|------------------|
| Mass:             | 1231.77006       |
| m/z:              | 666.8022         |
| Charge:           | 2+               |
| Retentiontime:    | 110.403625488281 |
| Score:            | 115.5728         |
| Mass Error [ppm]: | 0.0021197        |
| PEP:              | 0.00010425       |
| Precursor Type:   | MULTI            |

general information

|                       |             |
|-----------------------|-------------|
| Annotation:           | 9 of 12     |
| AminoAcids Coverage:  | 75 %        |
| Intensity Coverage:   | 68 %        |
| Peak Coverage:        | 27 %        |
| Protein Localisation: | 156 ... 167 |

| a ion      |            | b <sup>2+</sup> ion |            | b ion      |            |    |     |    | y ion      |            | y <sup>2+</sup> ion |           |
|------------|------------|---------------------|------------|------------|------------|----|-----|----|------------|------------|---------------------|-----------|
| Δ dalton   | mass       | Δ dalton            | mass       | Δ dalton   | mass       |    | seq |    | Δ dalton   | mass       | Δ dalton            | mass      |
|            | 74.0600403 |                     | 102.054955 |            | 102.054955 | 1  | T   | 11 |            |            |                     |           |
| -0.0466464 | 187.144104 |                     | 215.139019 | +0.0068551 | 215.139019 | 2  | I   | 10 | 1231.72965 |            | 1231.72965          |           |
|            | 300.228168 |                     | 328.223083 | +0.1392828 | 328.223083 | 3  | I   | 9  | 1118.64559 | -0.0363347 | 559.826432          | +0.099044 |
|            | 429.270761 |                     | 457.265676 | +0.0028787 | 457.265676 | 4  | E   | 8  | 1005.56152 | -0.1470339 | 1005.56152          |           |
|            | 526.323525 |                     | 554.31844  |            | 554.31844  | 5  | P   | 7  | 876.518931 | -0.0723363 | 876.518931          |           |
|            | 673.391939 |                     | 701.386854 |            | 701.386854 | 6  | F   | 6  | 779.466167 | +0.0841262 | 779.466167          |           |
|            | 774.439618 |                     | 802.434532 |            | 802.434532 | 7  | T   | 5  | 632.397753 | +0.1519908 | 632.397753          |           |
|            | 887.523682 | -0.1144378          | 458.262936 | -0.1448169 | 915.518596 | 8  | I   | 4  | 531.350074 |            | 531.350074          |           |
|            | 1000.60775 |                     | 1028.60266 | -0.2564688 | 1028.60266 | 9  | I   | 3  | 418.26601  |            | 418.26601           |           |
|            | 1071.64486 |                     | 1099.63977 | -0.1037632 | 1099.63977 | 10 | A   | 2  | 305.181946 | +0.0700678 | 305.181946          |           |
|            | 1158.67689 |                     | 1186.6718  |            | 1186.6718  | 11 | S   | 1  | 234.144833 |            | 234.144833          |           |
|            |            |                     |            |            |            | 12 | K   | 0  | 147.112804 |            | 147.112804          |           |

Scan number 1630 Raw file 20081206\_Orbi7\_SaZa\_ADH\_FN\_Exp\_1\_InGel\_04  
 Method ITMS; CID Genenames TM4SF1

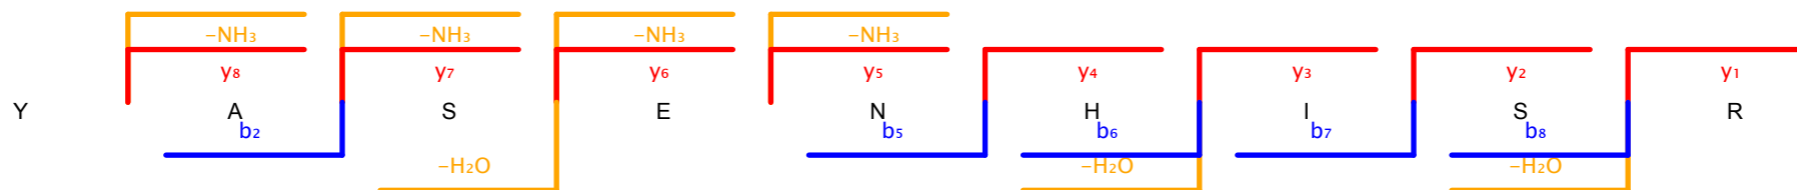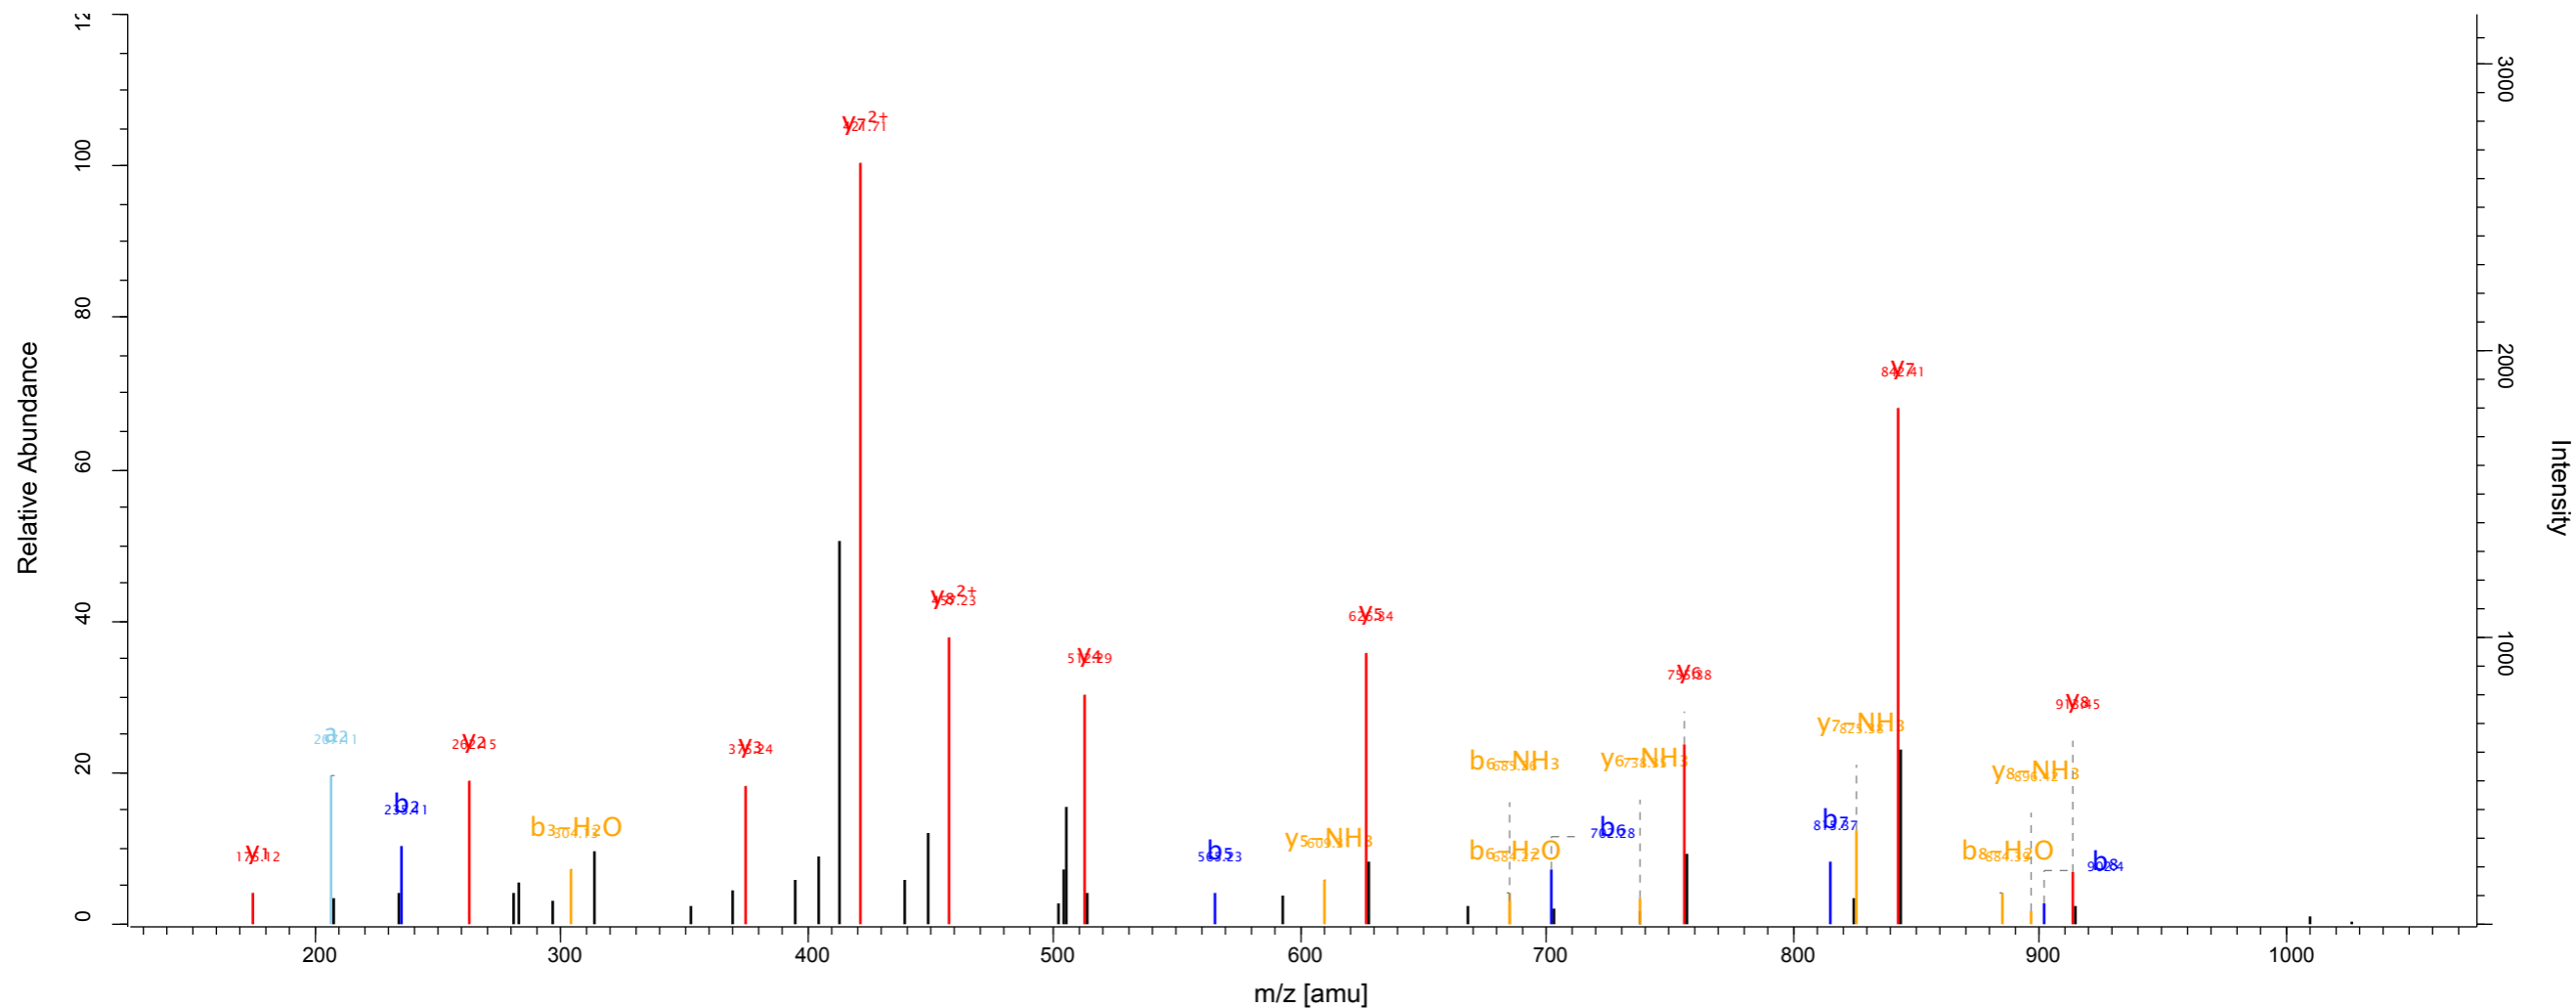

precursor information

|                       |                  |
|-----------------------|------------------|
| Mass:                 | 1075.50661       |
| m/z:                  | 538.7506         |
| Charge:               | 2+               |
| Retention time:       | 22.6102601040030 |
| Score:                | 206.7817         |
| Mass Error (ppm):     | -0.03007         |
| gPDP:                 | 7.0781E-15       |
| Annotation:           | 8 of 0           |
| AminoAcids Coverage:  | 80 %             |
| Intensity Coverage:   | 68 %             |
| Peak Coverage:        | 46 %             |
| Protein Localisation: | 37 ... 45        |

| a ion      |              | b ion      |              |   |     |   | y ion        |            | y <sup>2+</sup> ion |            |
|------------|--------------|------------|--------------|---|-----|---|--------------|------------|---------------------|------------|
| Δ dalton   | mass         | Δ dalton   | mass         |   | seq |   | Δ dalton     | mass       | Δ dalton            | mass       |
|            | 136.07569038 |            | 164.070605   | 1 | Y   | 8 |              |            |                     |            |
| -0.0415609 | 207.11280417 | +0.0777365 | 235.10771879 | 2 | A   | 7 | 913.44861917 | +0.0599257 | 457.22794782        | +0.2180361 |
|            | 294.14483258 |            | 322.1397472  | 3 | S   | 6 | 842.41150539 | +0.0407041 | 421.70939093        | +0.1505334 |
|            | 423.18742568 |            | 451.1823403  | 4 | E   | 5 | 755.37947698 | +0.0416656 | 755.37947698        |            |
|            | 537.23035312 | +0.0771004 | 565.22526775 | 5 | N   | 4 | 626.33688388 | +0.0158383 | 626.33688388        |            |
|            | 674.28926499 | +0.0096436 | 702.28417961 | 6 | H   | 3 | 512.29395643 | -0.0249135 | 512.29395643        |            |
|            | 787.37332897 | +0.0658995 | 815.36824359 | 7 | I   | 2 | 375.23504457 | +0.0808124 | 375.23504457        |            |
|            | 874.40535738 | +0.014706  | 902.400272   | 8 | S   | 1 | 262.15098059 | +0.1143087 | 262.15098059        |            |
|            |              |            |              | 9 | R   | 0 | 175.11895218 | -0.0340523 | 175.11895218        |            |

Scan number 7103 Raw file 20081206\_Orbi7\_SaZa\_ADH\_FN\_Exp\_1\_InGel\_06  
 Method ITMS; CID Genenames TNFSF15

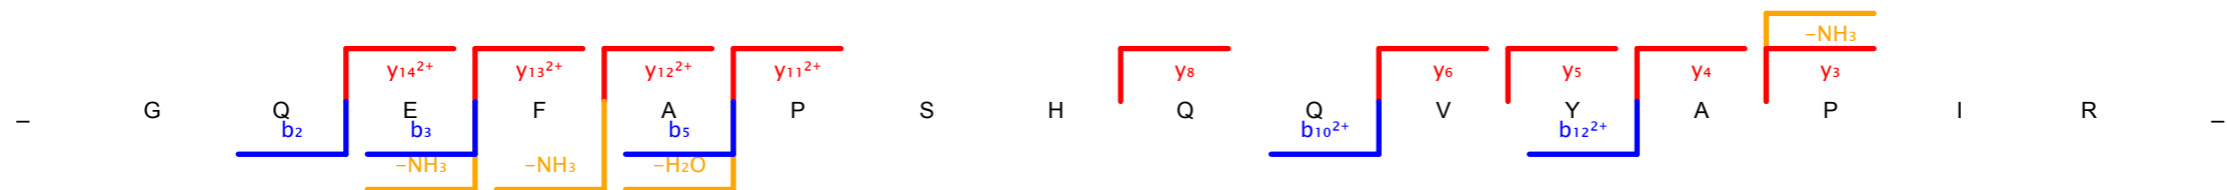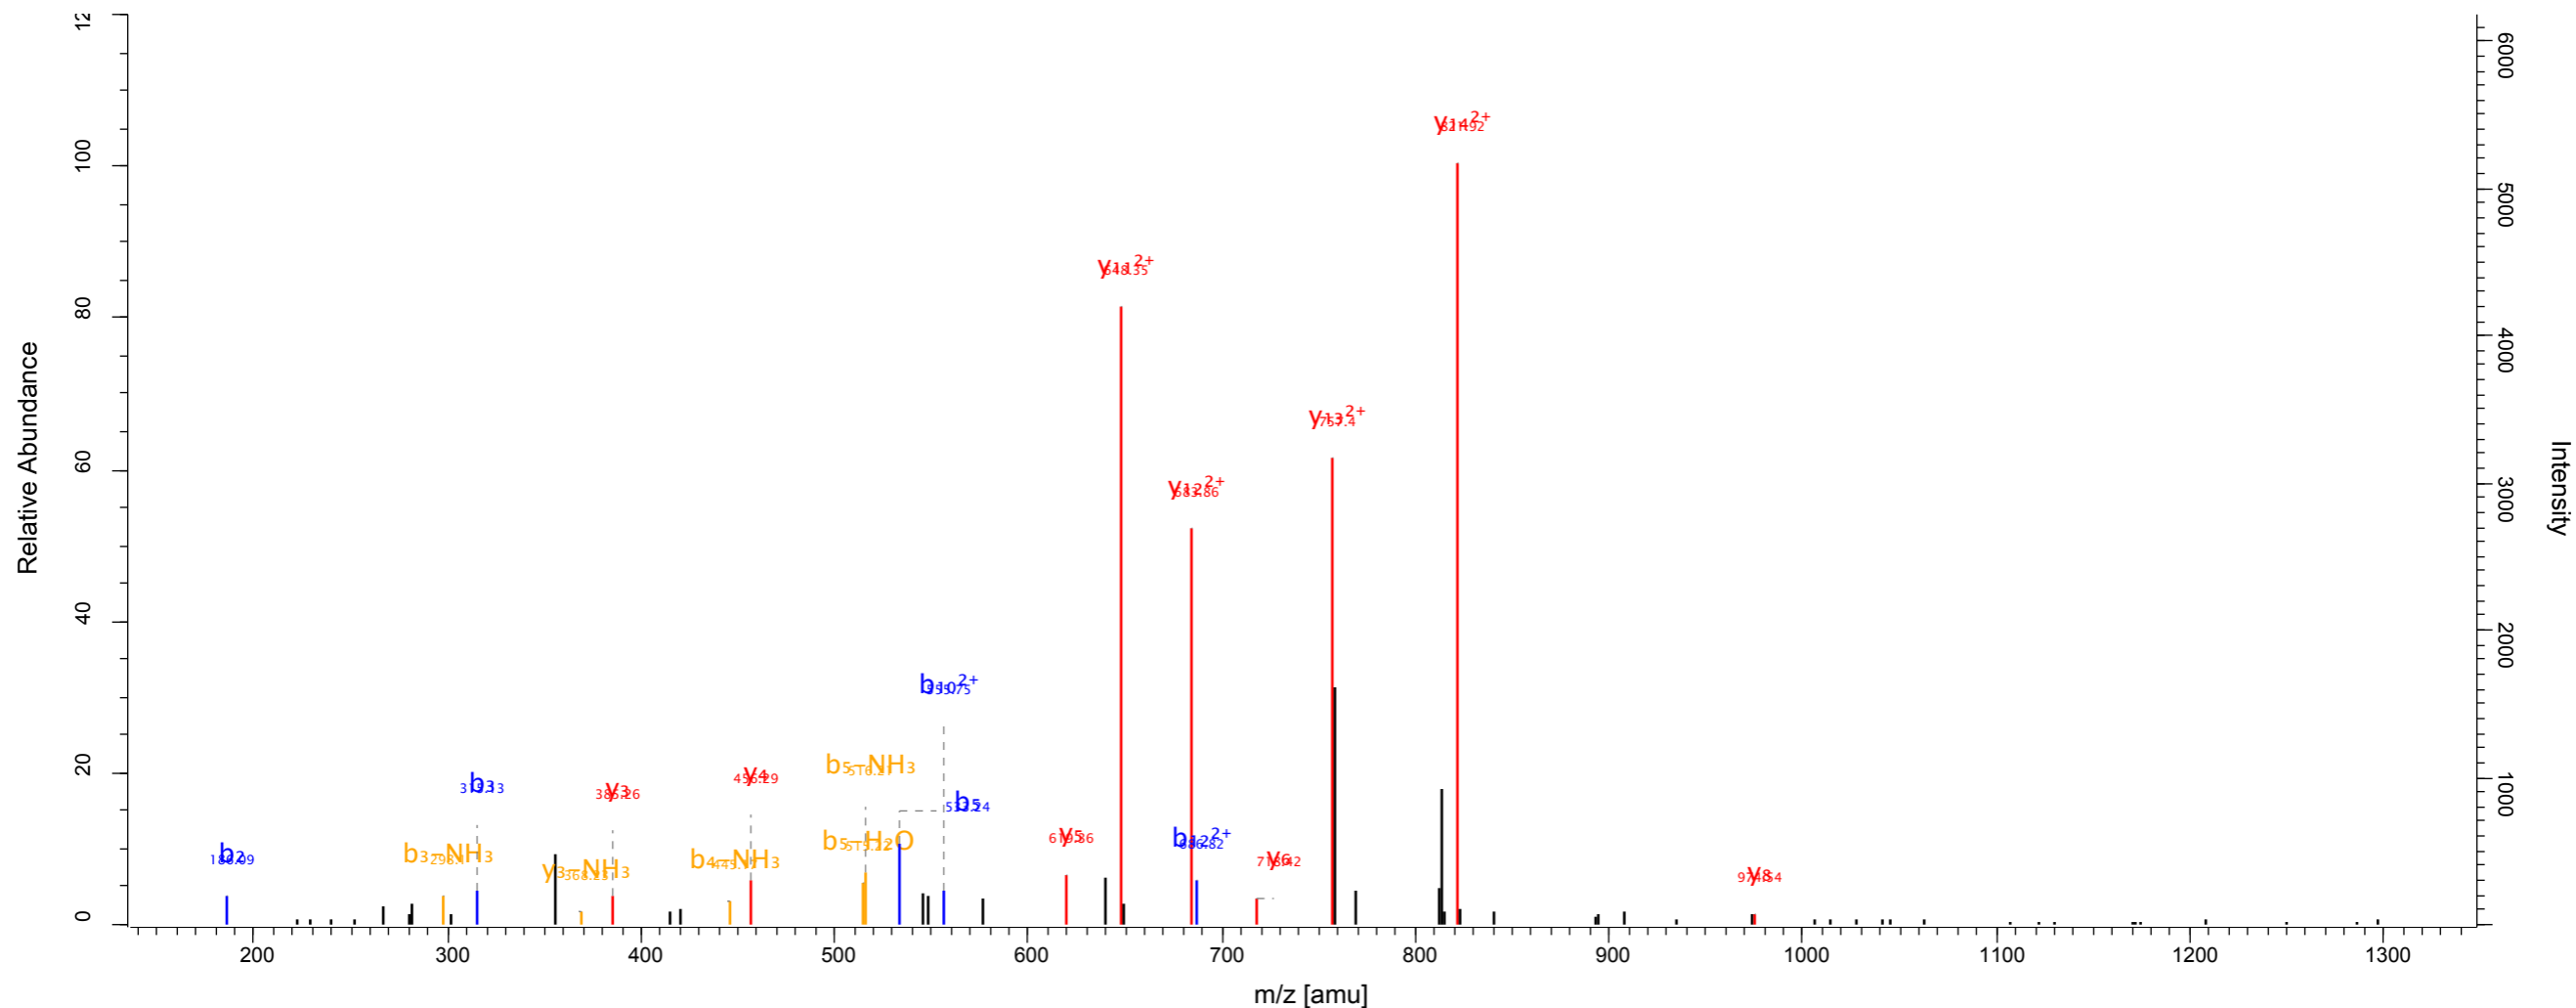

precursor information

|                   |                  |
|-------------------|------------------|
| Mass:             | 1826.00450       |
| m/z:              | 600.07547        |
| Charge:           | 2+               |
| Retention time:   | 62.0040664672852 |
| Score:            | 08.04200         |
| Mass Error [ppm]: | 0.07705          |
| DEP:              | 0.00020882       |
| Precursor Type:   | MULTI            |

general information

|                       |           |
|-----------------------|-----------|
| Annotation:           | 11 of 16  |
| AminoAcids Coverage:  | 60 %      |
| Intensity Coverage:   | 75 %      |
| Peak Coverage:        | 30 %      |
| Protein Localisation: | 74 ... 89 |

| b <sup>2+</sup> ion |              | b ion      |              |     | y ion |          | y <sup>2+</sup> ion |            |                         |
|---------------------|--------------|------------|--------------|-----|-------|----------|---------------------|------------|-------------------------|
| Δ dalton            | mass         | Δ dalton   | mass         | seq |       | Δ dalton | mass                | Δ dalton   | mass                    |
|                     | 58.02874019  |            | 58.02874019  | 1   | G     | 15       |                     |            |                         |
|                     | 186.0873177  | +0.0228355 | 186.0873177  | 2   | Q     | 14       | 1770.8921937        |            | 1770.8921937            |
|                     | 315.1299108  | -0.0843786 | 315.1299108  | 3   | E     | 13       | 1642.8336162        |            | 821.9204633 +0.2754155  |
|                     | 462.19832471 |            | 462.19832471 | 4   | F     | 12       | 1513.7910231        |            | 757.39914979 +0.0558063 |
|                     | 533.2354385  | -0.0139419 | 533.2354385  | 5   | A     | 11       | 1366.7226092        |            | 683.86494283 +0.2704942 |
|                     | 630.28820235 |            | 630.28820235 | 6   | P     | 10       | 1295.6854954        |            | 648.34638593 +0.2452889 |
|                     | 717.32023076 |            | 717.32023076 | 7   | S     | 9        | 1198.6327316        |            | 1198.6327316            |
|                     | 854.37914263 |            | 854.37914263 | 8   | H     | 8        | 1111.6007031        |            | 1111.6007031            |
|                     | 982.43772014 |            | 982.43772014 | 9   | Q     | 7        | 974.54179128        | +0.0842463 | 974.54179128            |
| +0.0067579          | 555.75178706 |            | 1110.4962976 | 10  | Q     | 6        | 846.48321377        |            | 846.48321377            |
|                     | 1209.5647116 |            | 1209.5647116 | 11  | V     | 5        | 718.42463626        | +0.0981909 | 718.42463626            |
| -0.0434273          | 686.81765828 |            | 1372.6280401 | 12  | Y     | 4        | 619.35622234        | -0.0263273 | 619.35622234            |
|                     | 1443.6651539 |            | 1443.6651539 | 13  | A     | 3        | 456.2928938         | +0.0846086 | 456.2928938             |
|                     | 1540.7179177 |            | 1540.7179177 | 14  | P     | 2        | 385.25578001        | -0.045697  | 385.25578001            |
|                     | 1653.8019817 |            | 1653.8019817 | 15  | I     | 1        | 288.20301616        |            | 288.20301616            |
|                     |              |            |              | 16  | R     | 0        | 175.11895218        |            | 175.11895218            |

Scan number 17478 Raw file 20081206\_Orbi7\_SaZa\_ADH\_FN\_Exp\_1\_InGel\_07  
 Method ITMS; CID Pepti... 128.08

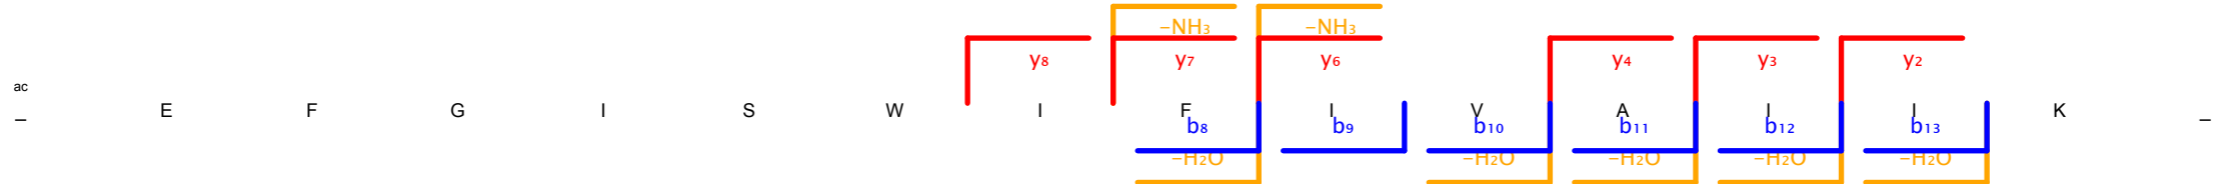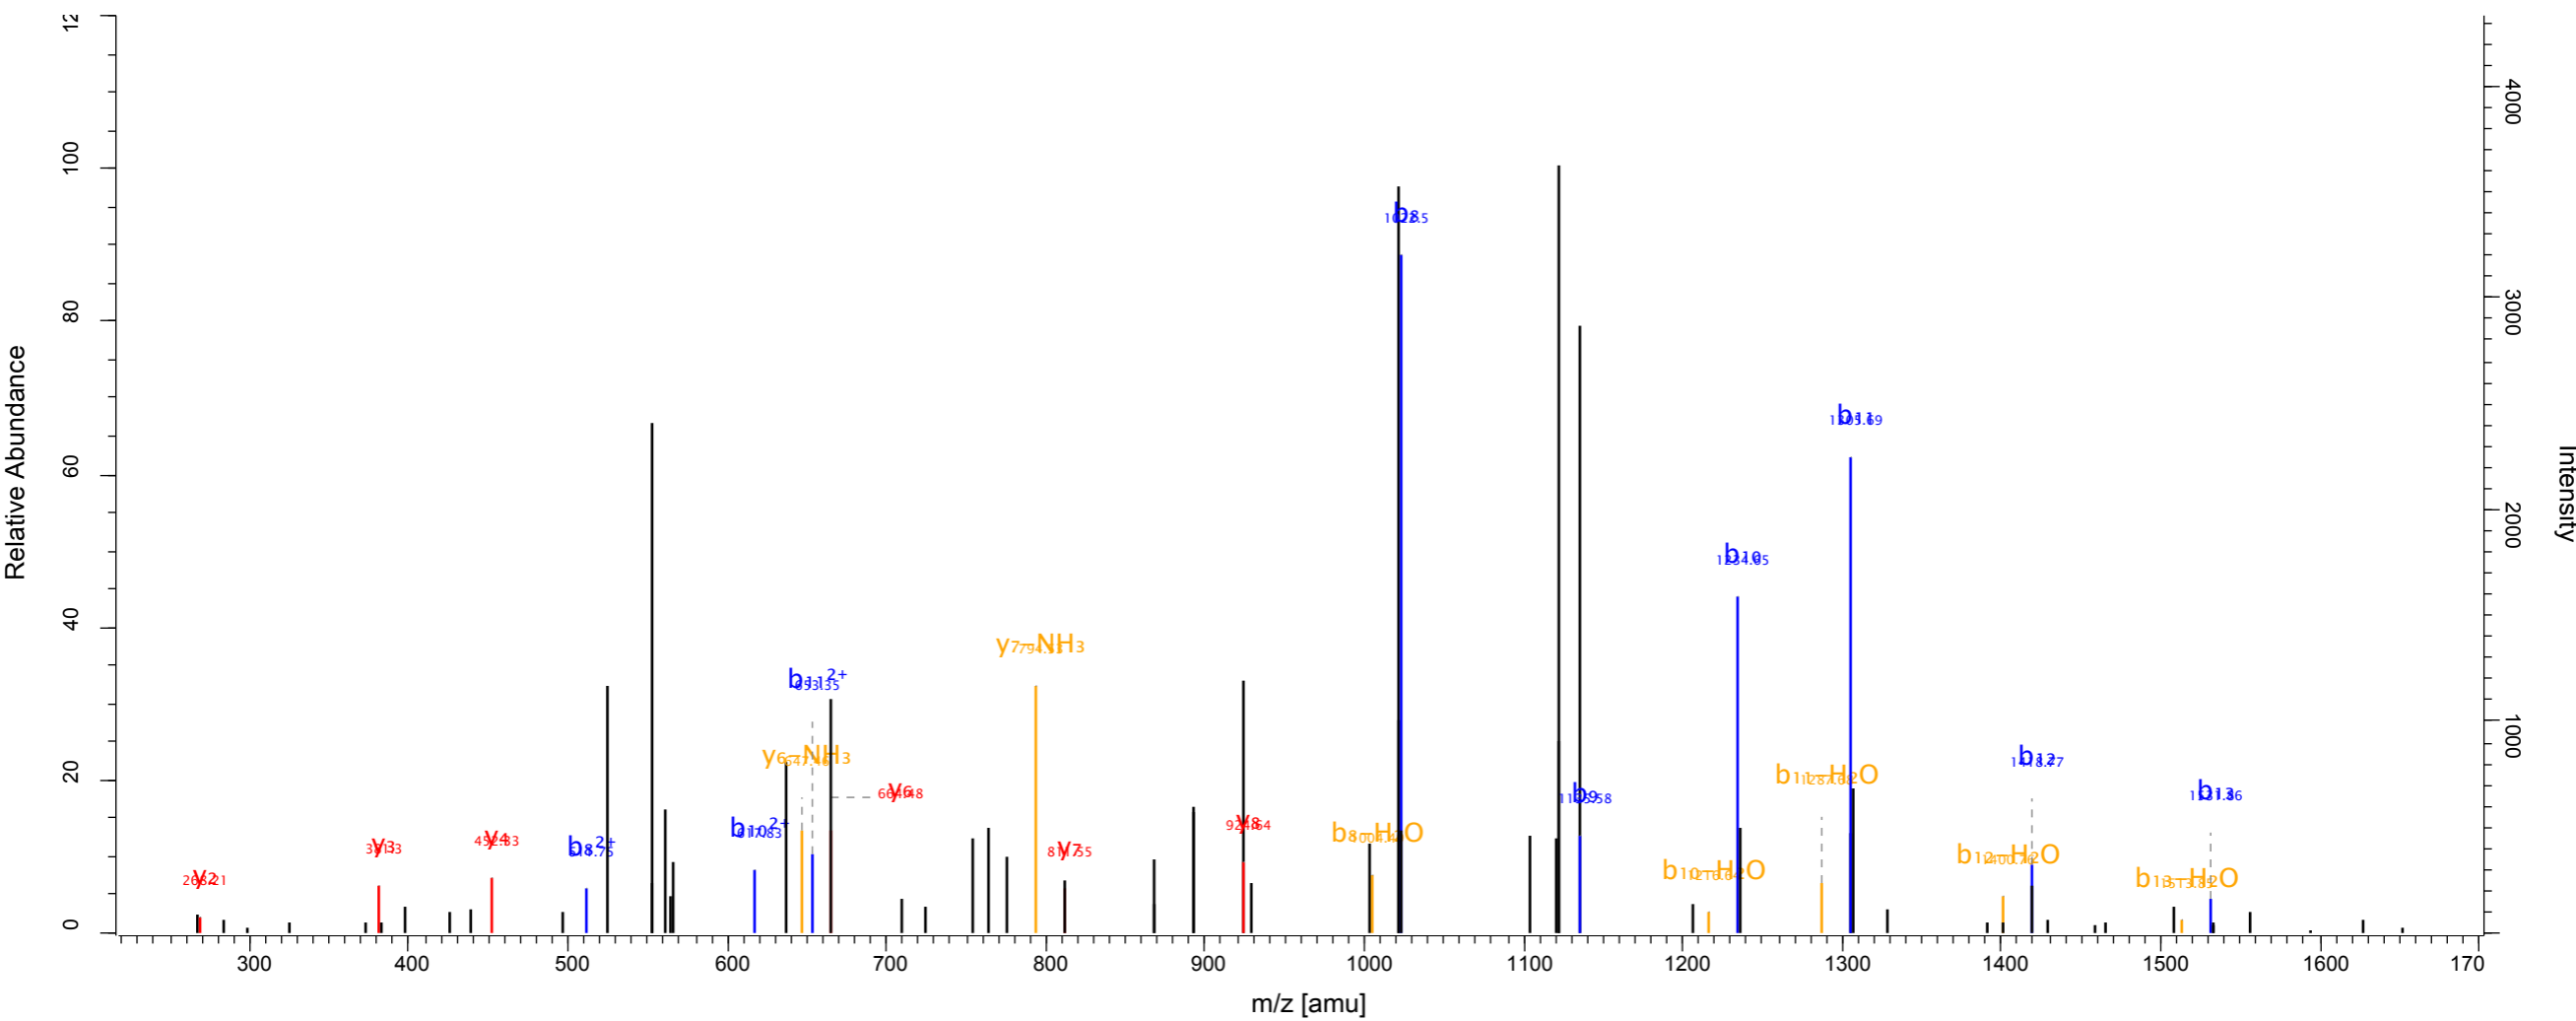

precursor information

|                   |                  |
|-------------------|------------------|
| Mass:             | 1676.05247       |
| m/z:              | 820.48251        |
| Charge:           | 2+               |
| Potentiation:     | 126.270170748525 |
| Score:            | 128.081          |
| Mass Error [ppm]: | 1.0058           |
| PEP:              | 1.206507         |
| Precursor Type:   | MULTI            |

general information

|                       |          |
|-----------------------|----------|
| Annotation:           | 8 of 14  |
| AminoAcids Coverage:  | 57%      |
| Intensity Coverage:   | 31%      |
| Peak Coverage:        | 28%      |
| Protein Localisation: | 2 ... 15 |

| b <sup>2+</sup> ion |                | b ion      |                |     | y ion |          |                |            |
|---------------------|----------------|------------|----------------|-----|-------|----------|----------------|------------|
| Δ dalton            | mass           | Δ dalton   | mass           | seq |       | Δ dalton | mass           |            |
|                     | 172.060434249  |            | 172.060434249  | 1   | E     | 13       |                |            |
|                     | 319.128848165  |            | 319.128848165  | 2   | F     | 12       | 1514.922483509 |            |
|                     | 376.150311889  |            | 376.150311889  | 3   | G     | 11       | 1367.854069593 |            |
|                     | 489.234375869  |            | 489.234375869  | 4   | I     | 10       | 1310.832605869 |            |
|                     | 576.266404279  |            | 576.266404279  | 5   | S     | 9        | 1197.748541889 |            |
|                     | 762.345717233  |            | 762.345717233  | 6   | W     | 8        | 1110.716513479 |            |
|                     | 875.429781213  |            | 875.429781213  | 7   | I     | 7        | 924.637200526  | -0.1184017 |
| +0.1527207          | 511.752735798  | -0.1728167 | 1022.498195129 | 8   | F     | 6        | 811.553136545  | -0.1040399 |
|                     | 1135.58225911  | +0.0501872 | 1135.58225911  | 9   | I     | 5        | 664.484722629  | +0.0857119 |
| -0.1420241          | 617.828974746  | -0.1820451 | 1234.650673026 | 10  | V     | 4        | 551.400658649  |            |
| -0.0786718          | 653.34753164   | -0.1388366 | 1305.687786814 | 11  | A     | 3        | 452.332244732  | -0.0273741 |
|                     | 1418.771850794 | -0.3425295 | 1418.771850794 | 12  | I     | 2        | 381.295130945  | +0.1209457 |
|                     | 1531.855914774 | -0.1789128 | 1531.855914774 | 13  | I     | 1        | 268.211066964  | +0.1894762 |
|                     |                |            |                | 14  | K     | 0        | 155.127002984  |            |

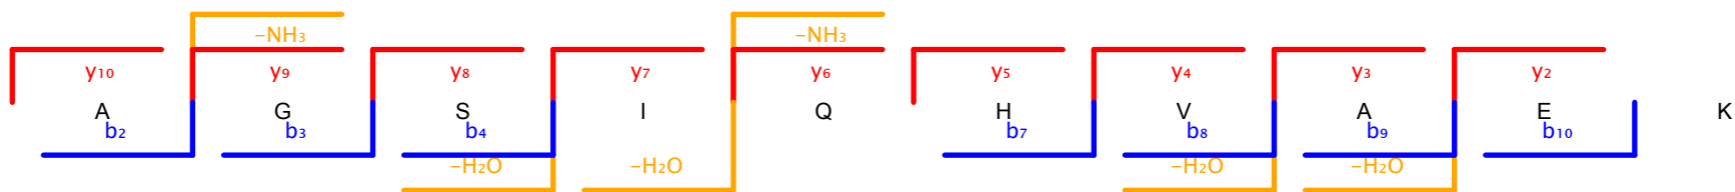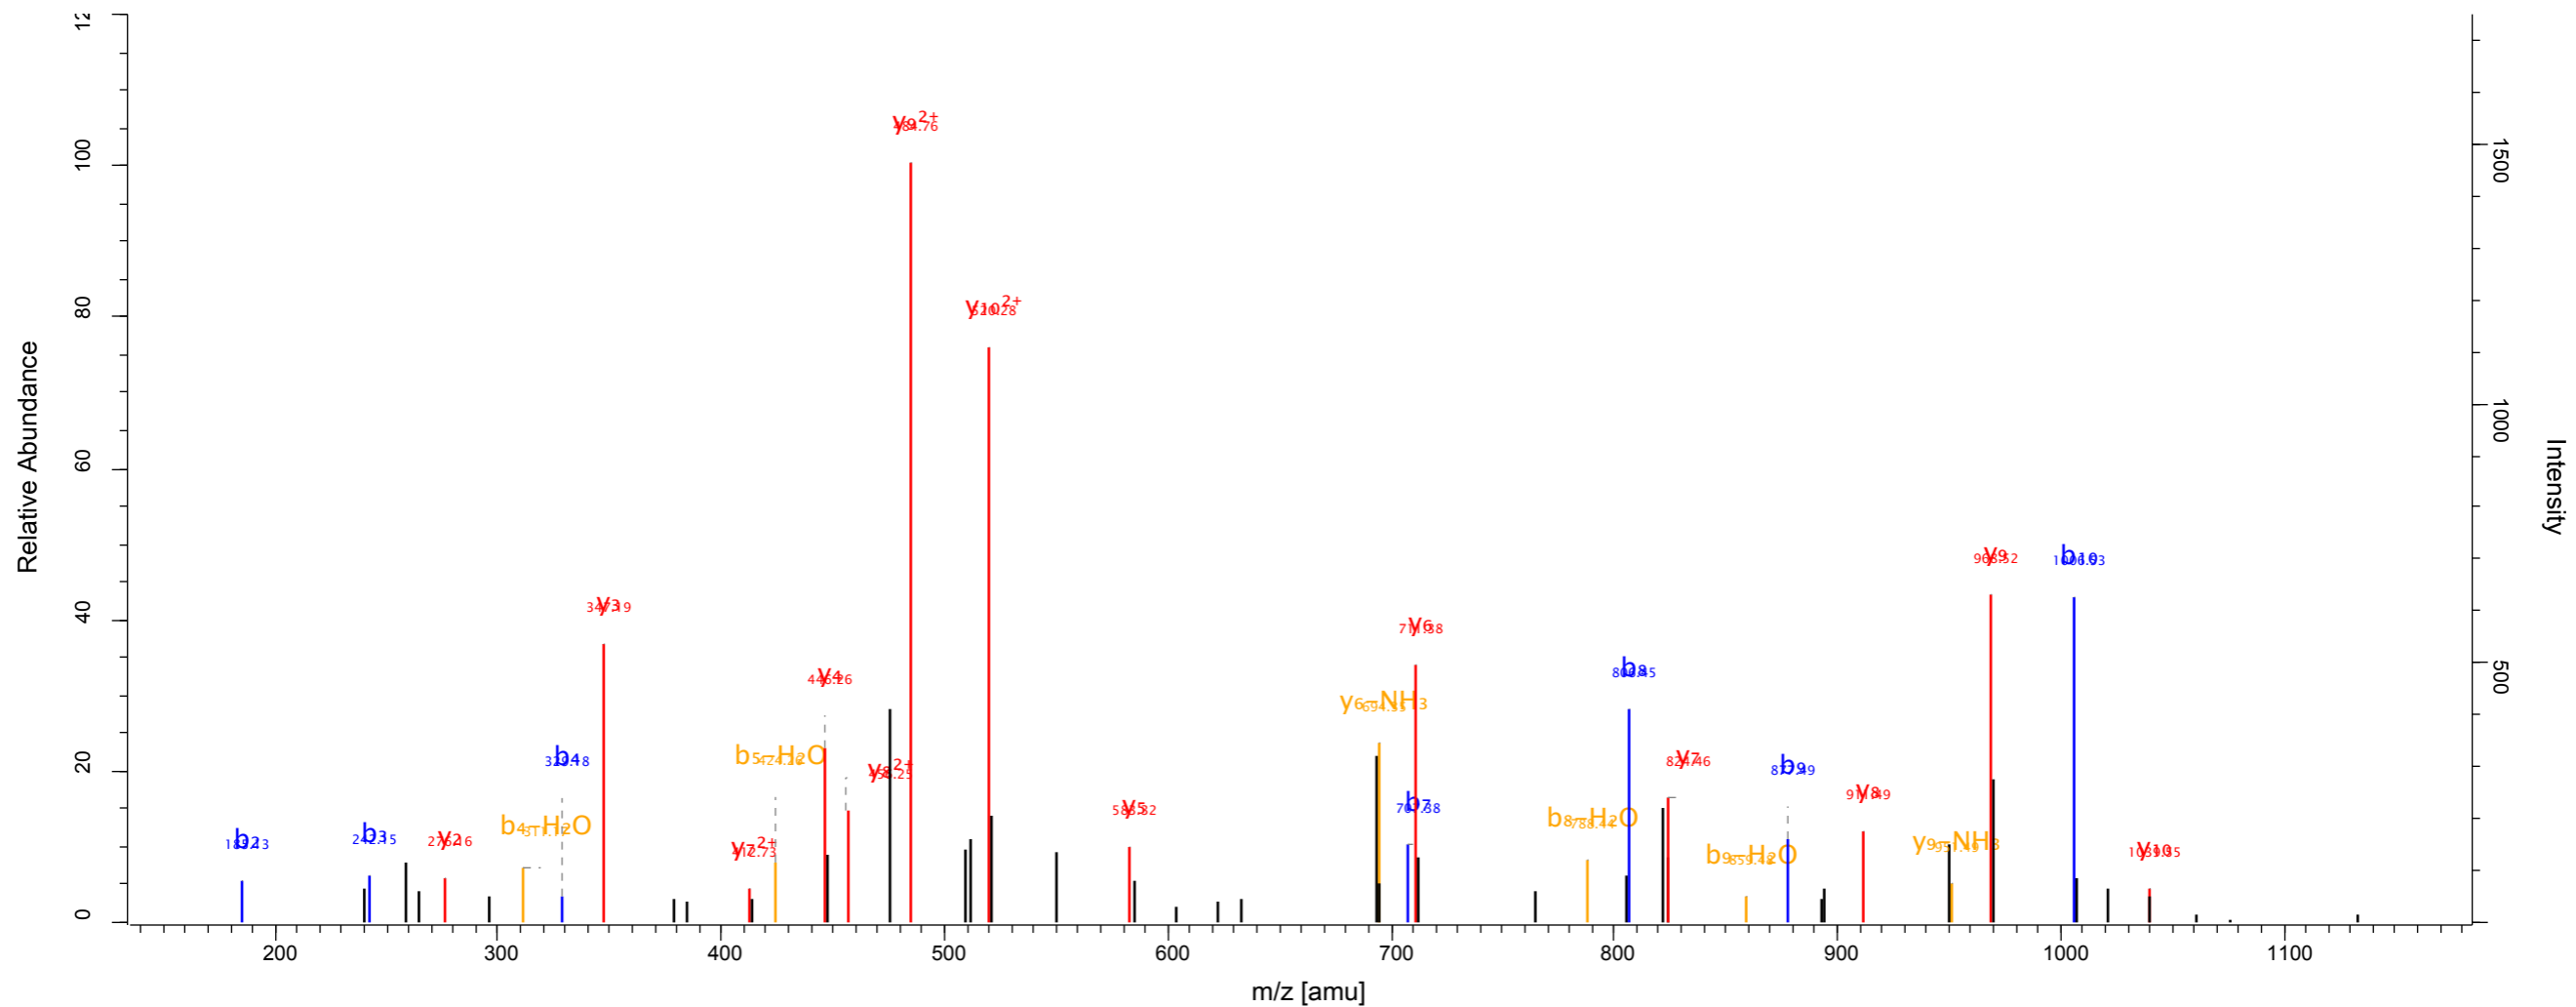

precursor information

|                   |                 |
|-------------------|-----------------|
| Mass:             | 1151.62027      |
| m/z:              | 576.82106       |
| Charge:           | 2+              |
| Retention time:   | 41.218578238622 |
| Score:            | 182.2842        |
| Mass Error (ppm): | -0.42752        |
| PEP:              | 7.6021E-05      |
| Precursor Type:   | ISO             |

general information

|                       |             |
|-----------------------|-------------|
| Annotation:           | 9 of 11     |
| AminoAcids Coverage:  | 82 %        |
| Intensity Coverage:   | 60 %        |
| Peak Coverage:        | 42 %        |
| Protein Localisation: | 110 ... 120 |

| b ion      |                |    |     |    | y ion          |            | y <sup>2+</sup> ion |            |
|------------|----------------|----|-----|----|----------------|------------|---------------------|------------|
| Δ dalton   | mass           |    | seq |    | Δ dalton       | mass       | Δ dalton            | mass       |
|            | 114.091340447  | 1  | I   | 10 |                |            |                     |            |
| -0.0830136 | 185.128454235  | 2  | A   | 9  | 1039.553084246 | -0.2571858 | 520.280180356       | +0.0443436 |
| +0.1464077 | 242.149917958  | 3  | G   | 8  | 968.515970459  | -0.0627844 | 484.761623463       | +0.2154273 |
| -0.2223516 | 329.181946368  | 4  | S   | 7  | 911.494506735  | -0.1062621 | 456.250891601       | +0.2489863 |
|            | 442.266010349  | 5  | I   | 6  | 824.462478325  | +0.133591  | 412.734877396       | +0.0613262 |
|            | 570.32458786   | 6  | Q   | 5  | 711.378414345  | -0.0908167 | 711.378414345       |            |
| -0.1119543 | 707.383499722  | 7  | H   | 4  | 583.319836833  | +0.0103634 | 583.319836833       |            |
| +0.0730497 | 806.451913639  | 8  | V   | 3  | 446.260924971  | -0.0267331 | 446.260924971       |            |
| +0.0541244 | 877.489027426  | 9  | A   | 2  | 347.192511055  | +0.0013976 | 347.192511055       |            |
| +0.01617   | 1006.531620523 | 10 | E   | 1  | 276.155397267  | +0.074278  | 276.155397267       |            |
|            |                | 11 | K   | 0  | 147.112804171  |            | 147.112804171       |            |

Scan number 14593 Raw file 20081206\_Orbi7\_SaZa\_ADH\_FN\_Exp\_1\_InGel\_08  
 Method ITMS; CID Genenames LYSMD3

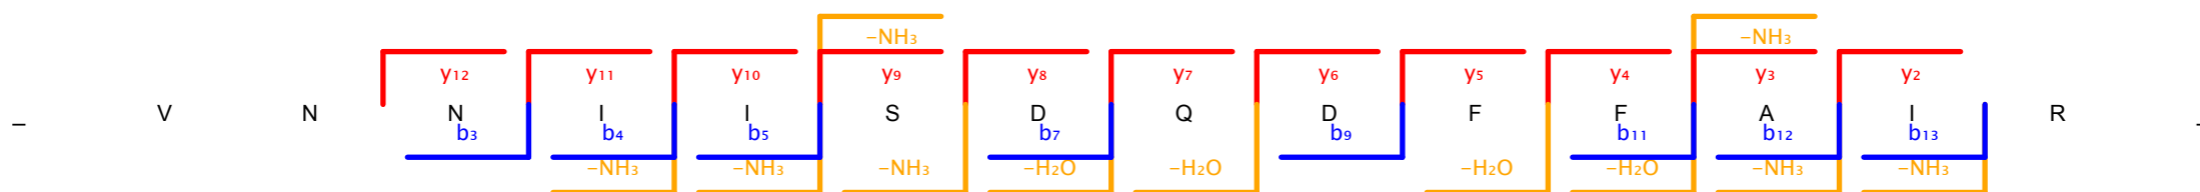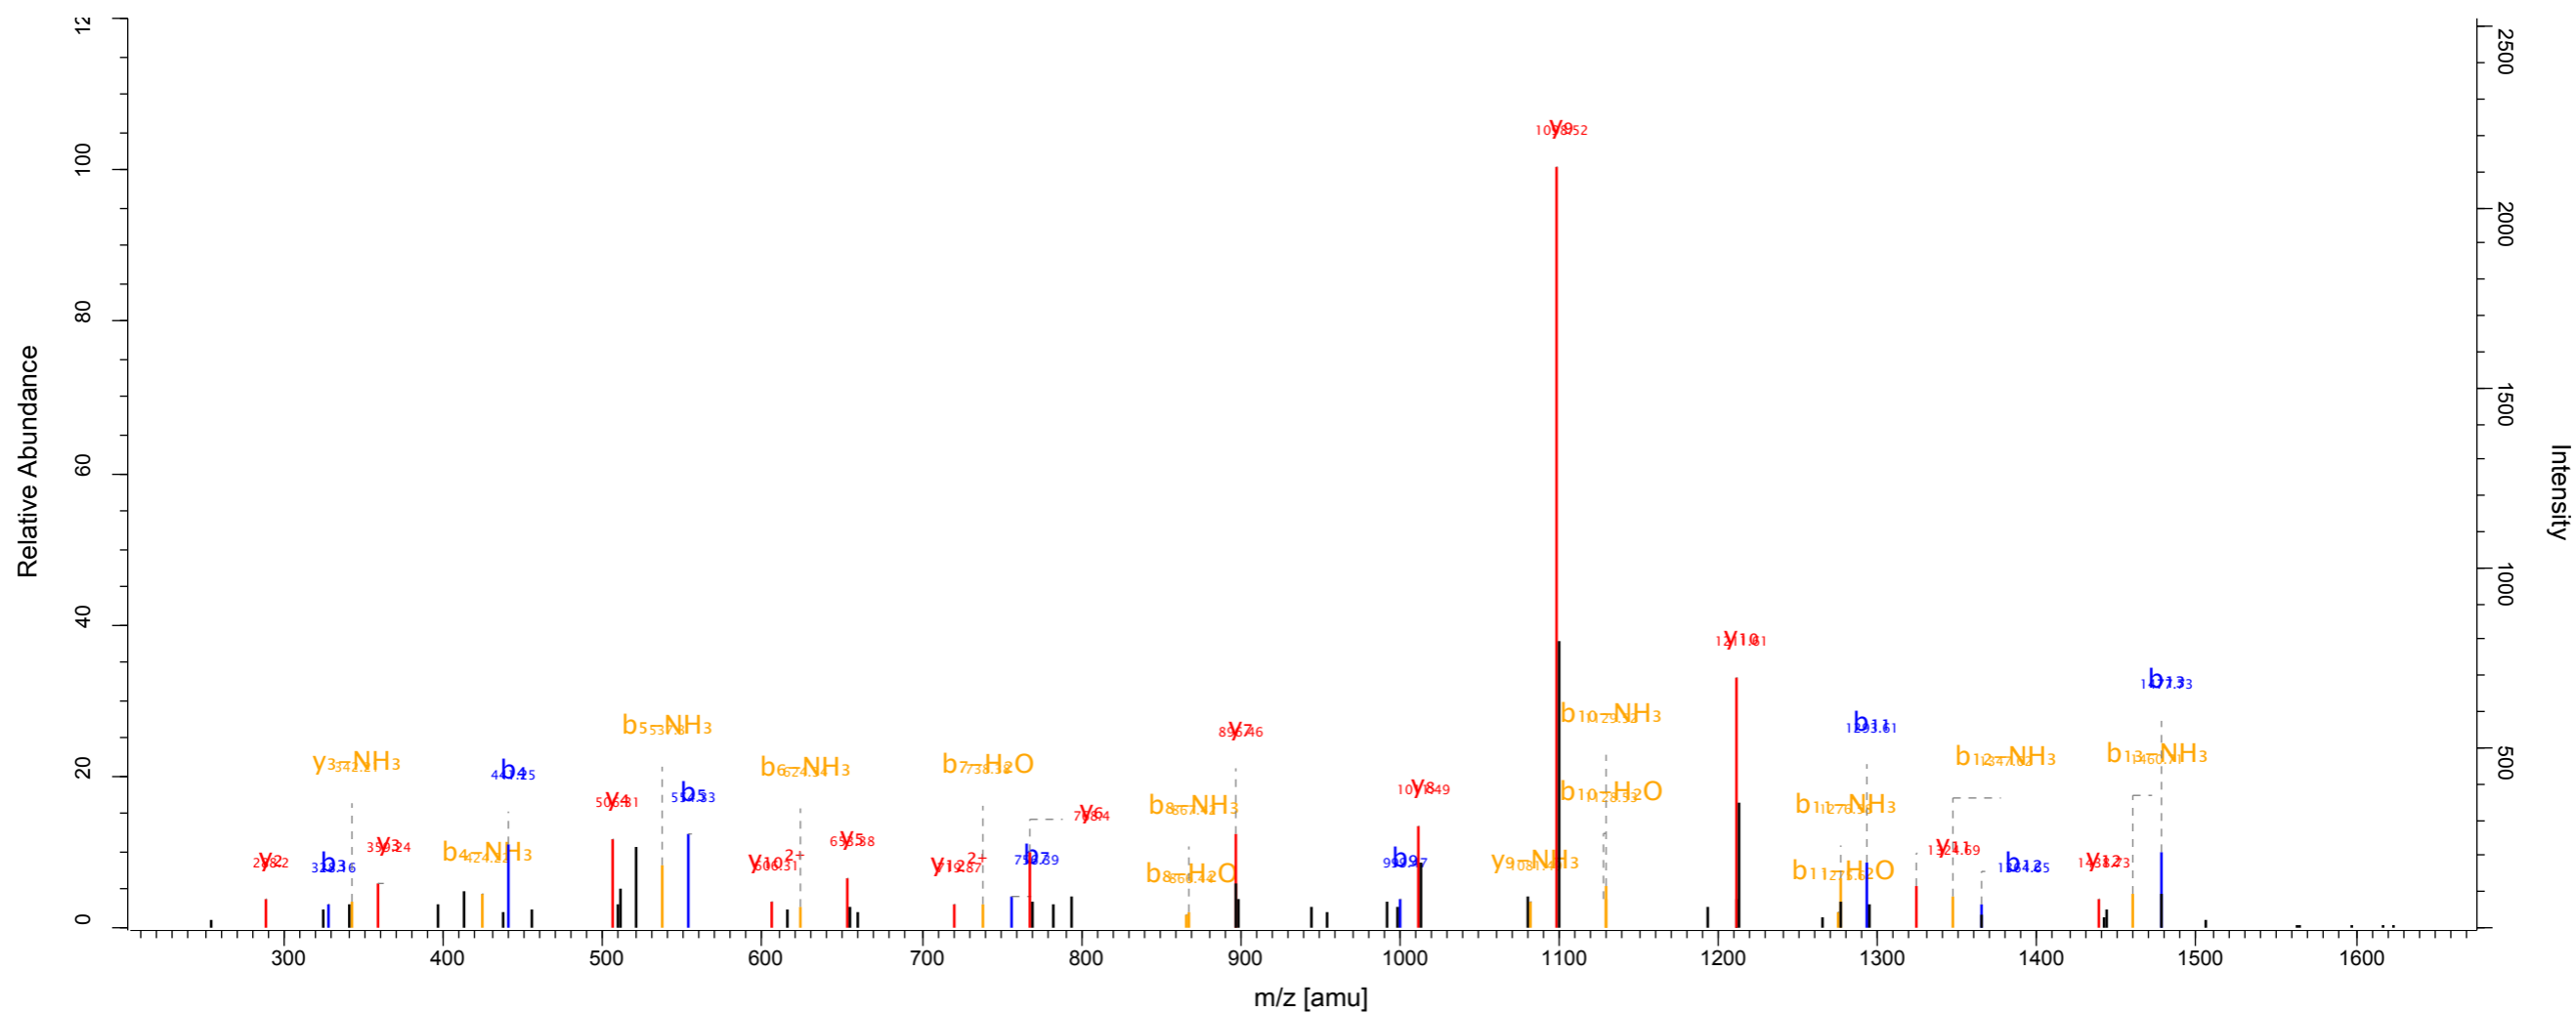

precursor information

|                   |                  |
|-------------------|------------------|
| Mass:             | 1650.82602       |
| m/z:              | 826.42528        |
| Charge:           | 2+               |
| Potentiation:     | 106.107272426522 |
| Score:            | 200.2062         |
| Mass Error [ppm]: | -0.22400         |
| PEP:              | 1.2282516        |
| Precursor Type:   | ISO              |

| b ion      |                |    |     |    | y ion          |            | y <sup>2+</sup> ion |            |
|------------|----------------|----|-----|----|----------------|------------|---------------------|------------|
| Δ dalton   | mass           |    | seq |    | Δ dalton       | mass       | Δ dalton            | mass       |
|            | 100.075690383  | 1  | V   | 13 |                |            |                     |            |
|            | 214.11861783   | 2  | N   | 12 | 1552.775432622 |            | 1552.775432622      |            |
| +0.0699916 | 328.161545277  | 3  | N   | 11 | 1438.732505175 | +0.042153  | 719.869890821       | +0.0272649 |
| -0.0336952 | 441.245609258  | 4  | I   | 10 | 1324.689577728 | -0.084231  | 1324.689577728      |            |
| -0.1171488 | 554.329673238  | 5  | I   | 9  | 1211.605513747 | +0.0192421 | 606.306395107       | +0.0172743 |
|            | 641.361701648  | 6  | S   | 8  | 1098.521449767 | -0.0268209 | 1098.521449767      |            |
| -0.4741549 | 756.38864468   | 7  | D   | 7  | 1011.489421357 | -0.058208  | 1011.489421357      |            |
|            | 884.447222191  | 8  | Q   | 6  | 896.462478325  | +0.0827487 | 896.462478325       |            |
| +0.2243821 | 999.474165223  | 9  | D   | 5  | 768.403900814  | +0.0491632 | 768.403900814       |            |
|            | 1146.542579139 | 10 | F   | 4  | 653.376957782  | +0.0646926 | 653.376957782       |            |
| -0.0508124 | 1293.610993056 | 11 | F   | 3  | 506.308543865  | -0.029247  | 506.308543865       |            |
| -0.1213734 | 1364.648106843 | 12 | A   | 2  | 359.240129949  | +0.0642524 | 359.240129949       |            |
| -0.1487968 | 1477.732170824 | 13 | I   | 1  | 288.203016161  | +0.0079213 | 288.203016161       |            |
|            |                | 14 | R   | 0  | 175.118952181  |            | 175.118952181       |            |

general information

|                       |            |
|-----------------------|------------|
| Annotation:           | 11 of 14   |
| AminoAcids Coverage:  | 70%        |
| Intensity Coverage:   | 66%        |
| Peak Coverage:        | 46%        |
| Protein Localisation: | 92 ... 105 |



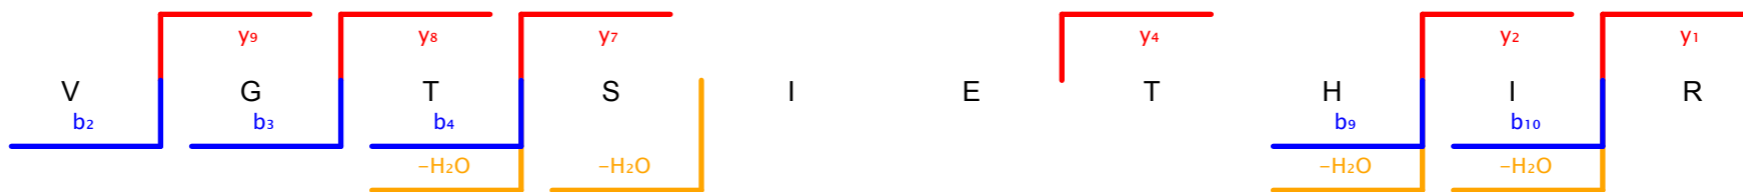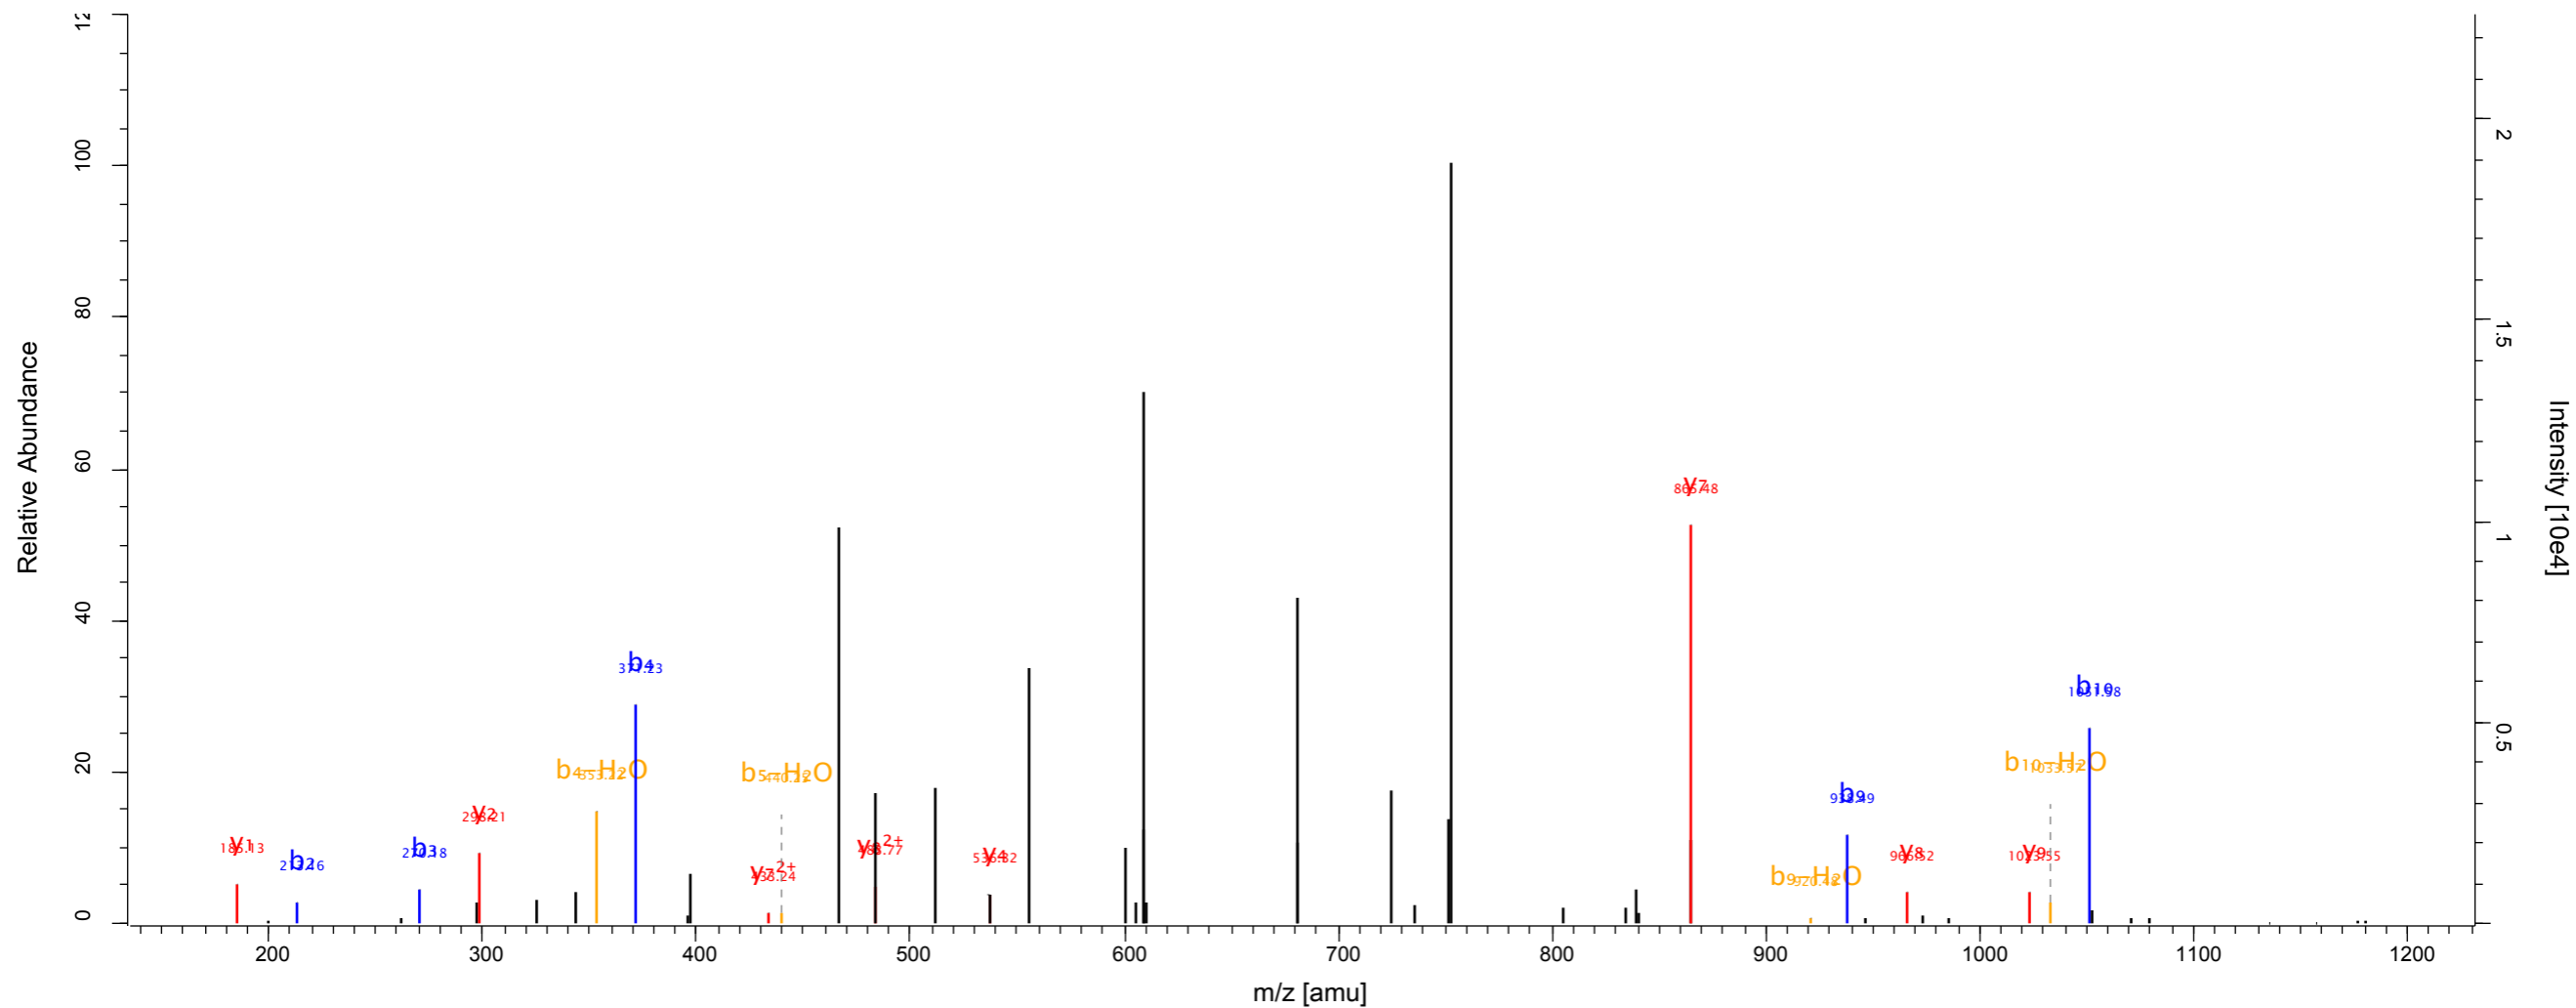

precursor information

|                   |                 |
|-------------------|-----------------|
| Mass:             | 1224.6825       |
| m/z:              | 613.34852       |
| Charge:           | 2+              |
| Retention time:   | 85.820068250275 |
| Score:            | 121.7328        |
| Mass Error (ppm): | -0.10966        |
| PEP:              | 0.00021725      |
| Precursor Type:   | MULTI           |

general information

|                       |             |
|-----------------------|-------------|
| Annotation:           | 8 of 11     |
| AminoAcids Coverage:  | 72 %        |
| Intensity Coverage:   | 28 %        |
| Peak Coverage:        | 31 %        |
| Protein Localisation: | 516 ... 526 |

| b ion      |                |    |     |    | y ion          |            | y <sup>2+</sup> ion |            |
|------------|----------------|----|-----|----|----------------|------------|---------------------|------------|
| Δ dalton   | mass           |    | seq |    | Δ dalton       | mass       | Δ dalton            | mass       |
|            | 114.091340447  | 1  | I   | 10 |                |            |                     |            |
| -0.1280161 | 213.159754363  | 2  | V   | 9  | 1122.614116698 |            | 1122.614116698      |            |
| +0.0381728 | 270.181218087  | 3  | G   | 8  | 1023.545702782 | +0.0048954 | 1023.545702782      |            |
| -0.0954127 | 371.228896561  | 4  | T   | 7  | 966.524239058  | +0.0131145 | 483.765757762       | -0.2234604 |
|            | 458.260924971  | 5  | S   | 6  | 865.476560584  | +0.0862446 | 433.241918525       | +0.2757817 |
|            | 571.344988951  | 6  | I   | 5  | 778.444532174  |            | 778.444532174       |            |
|            | 700.387582047  | 7  | E   | 4  | 665.360468194  |            | 665.360468194       |            |
|            | 801.435260522  | 8  | T   | 3  | 536.317875097  | +0.4821127 | 536.317875097       |            |
| -0.087251  | 938.494172384  | 9  | H   | 2  | 435.270196623  |            | 435.270196623       |            |
| -0.3165176 | 1051.578236364 | 10 | I   | 1  | 298.211284761  | +0.1311225 | 298.211284761       |            |
|            |                | 11 | R   | 0  | 185.127220781  | +0.0109628 | 185.127220781       |            |

Scan number 1723 Raw file 20081218\_Orbi7\_SaZa\_SA\_ADH\_FN\_Exp\_2\_InGel\_01  
 Method ITMS; CID Genenames WDR83OS

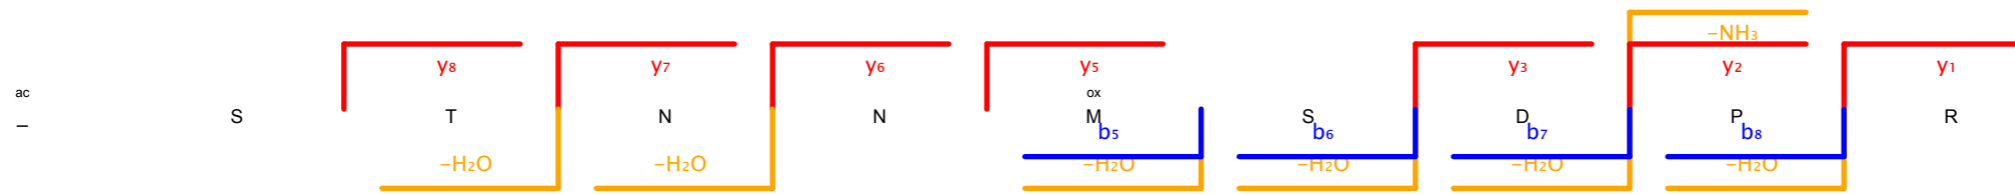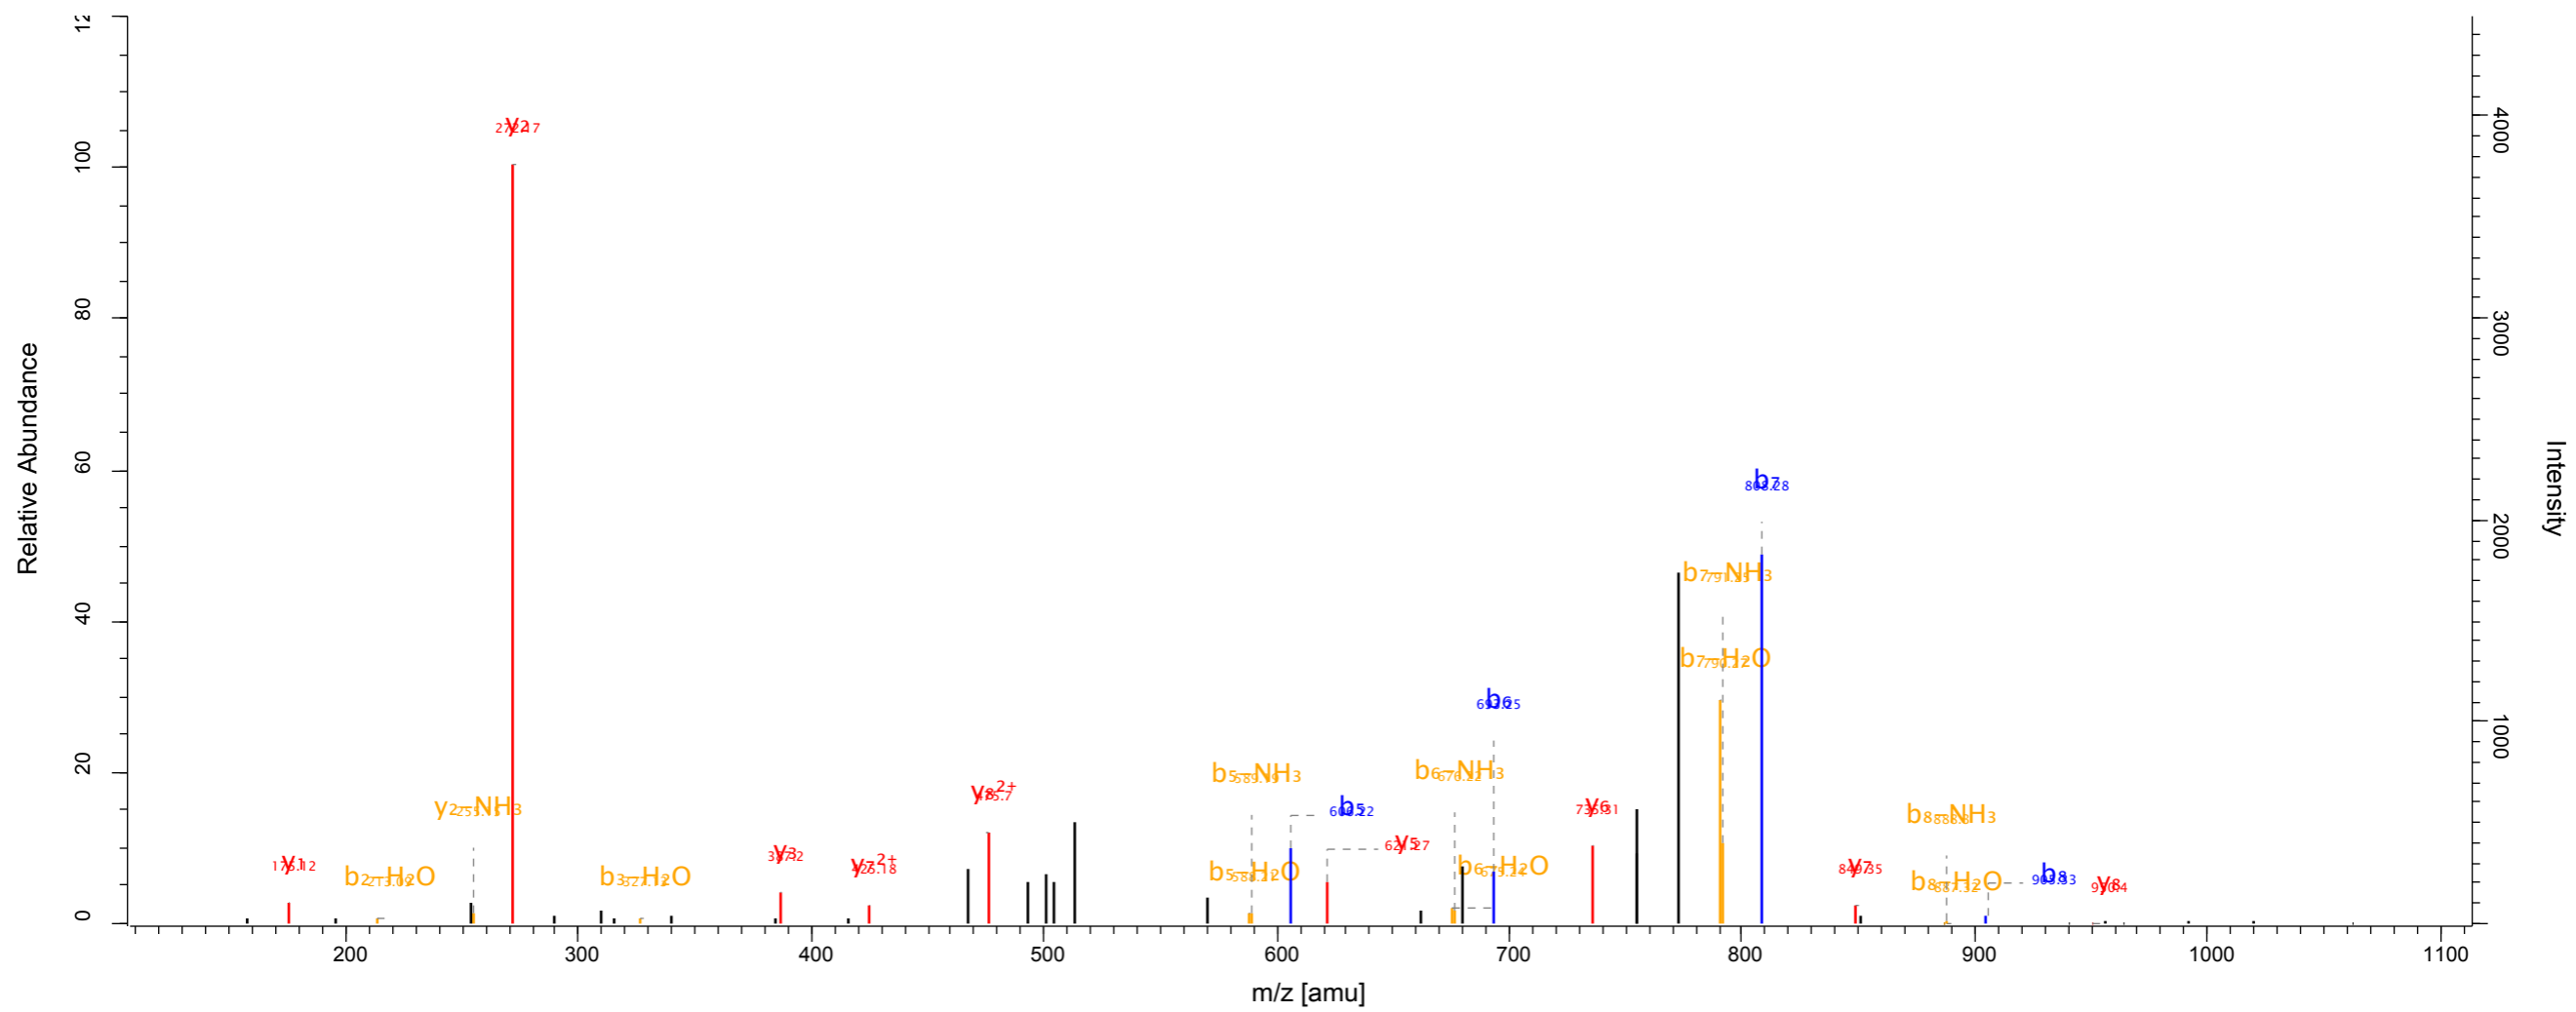

precursor information

|                       |                  |
|-----------------------|------------------|
| Mass:                 | 1078.42541       |
| m/z:                  | 540.22408        |
| Charge:               | 2+               |
| Retention time:       | 21.3200263077051 |
| Score:                | 180.7022         |
| Mass Error (ppm):     | 0.44004          |
| gED:                  | 2.5622E-07       |
| Annotation:           | 8 of 0           |
| AminoAcids Coverage:  | 80 %             |
| Intensity Coverage:   | 66 %             |
| Peak Coverage:        | 46 %             |
| Protein Localisation: | 2 ... 10         |

| b ion      |               |   |     |   | y ion         |            | y <sup>2+</sup> ion |            |
|------------|---------------|---|-----|---|---------------|------------|---------------------|------------|
| Δ dalton   | mass          |   | seq |   | Δ dalton      | mass       | Δ dalton            | mass       |
|            | 130.049869563 | 1 | S   | 8 |               |            |                     |            |
|            | 231.097548037 | 2 | T   | 7 | 950.399620072 | +0.1987686 | 475.703448269       | +0.076459  |
|            | 345.140475484 | 3 | N   | 6 | 849.351941598 | -0.1350837 | 425.179609032       | -0.0207345 |
|            | 459.183402931 | 4 | N   | 5 | 735.30901415  | -0.0209892 | 735.30901415        |            |
| -0.0081698 | 606.21880216  | 5 | M   | 4 | 621.266086703 | +0.1078147 | 621.266086703       |            |
| -0.1443853 | 693.25083057  | 6 | S   | 3 | 474.230687475 |            | 474.230687475       |            |
| -0.2808254 | 808.27773602  | 7 | D   | 2 | 387.198659065 | +0.0952252 | 387.198659065       |            |
| -0.1947342 | 905.330537454 | 8 | P   | 1 | 272.171716033 | -0.0624631 | 272.171716033       |            |
|            |               | 9 | R   | 0 | 175.118952181 | +0.0663811 | 175.118952181       |            |

Scan number 11330 Raw file 20081218\_Orbi7\_SaZa\_SA\_ADH\_FN\_Exp\_2\_InGel\_15  
 Method ITMS; CID Genenames COL13A1

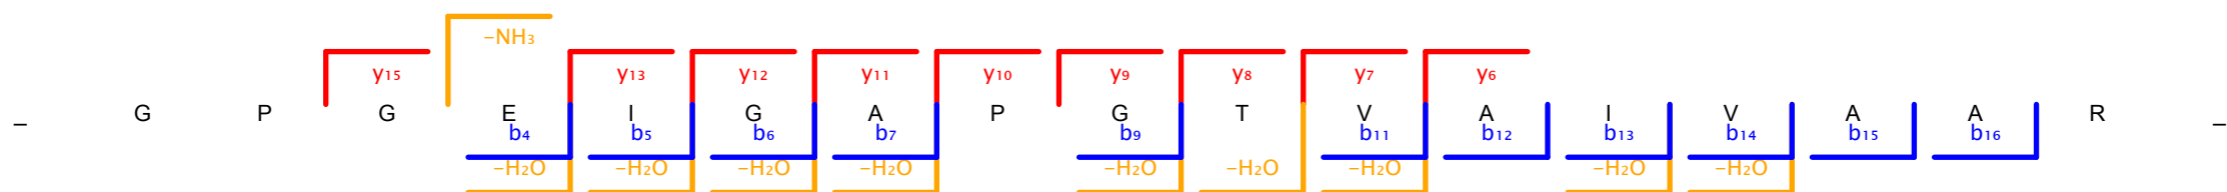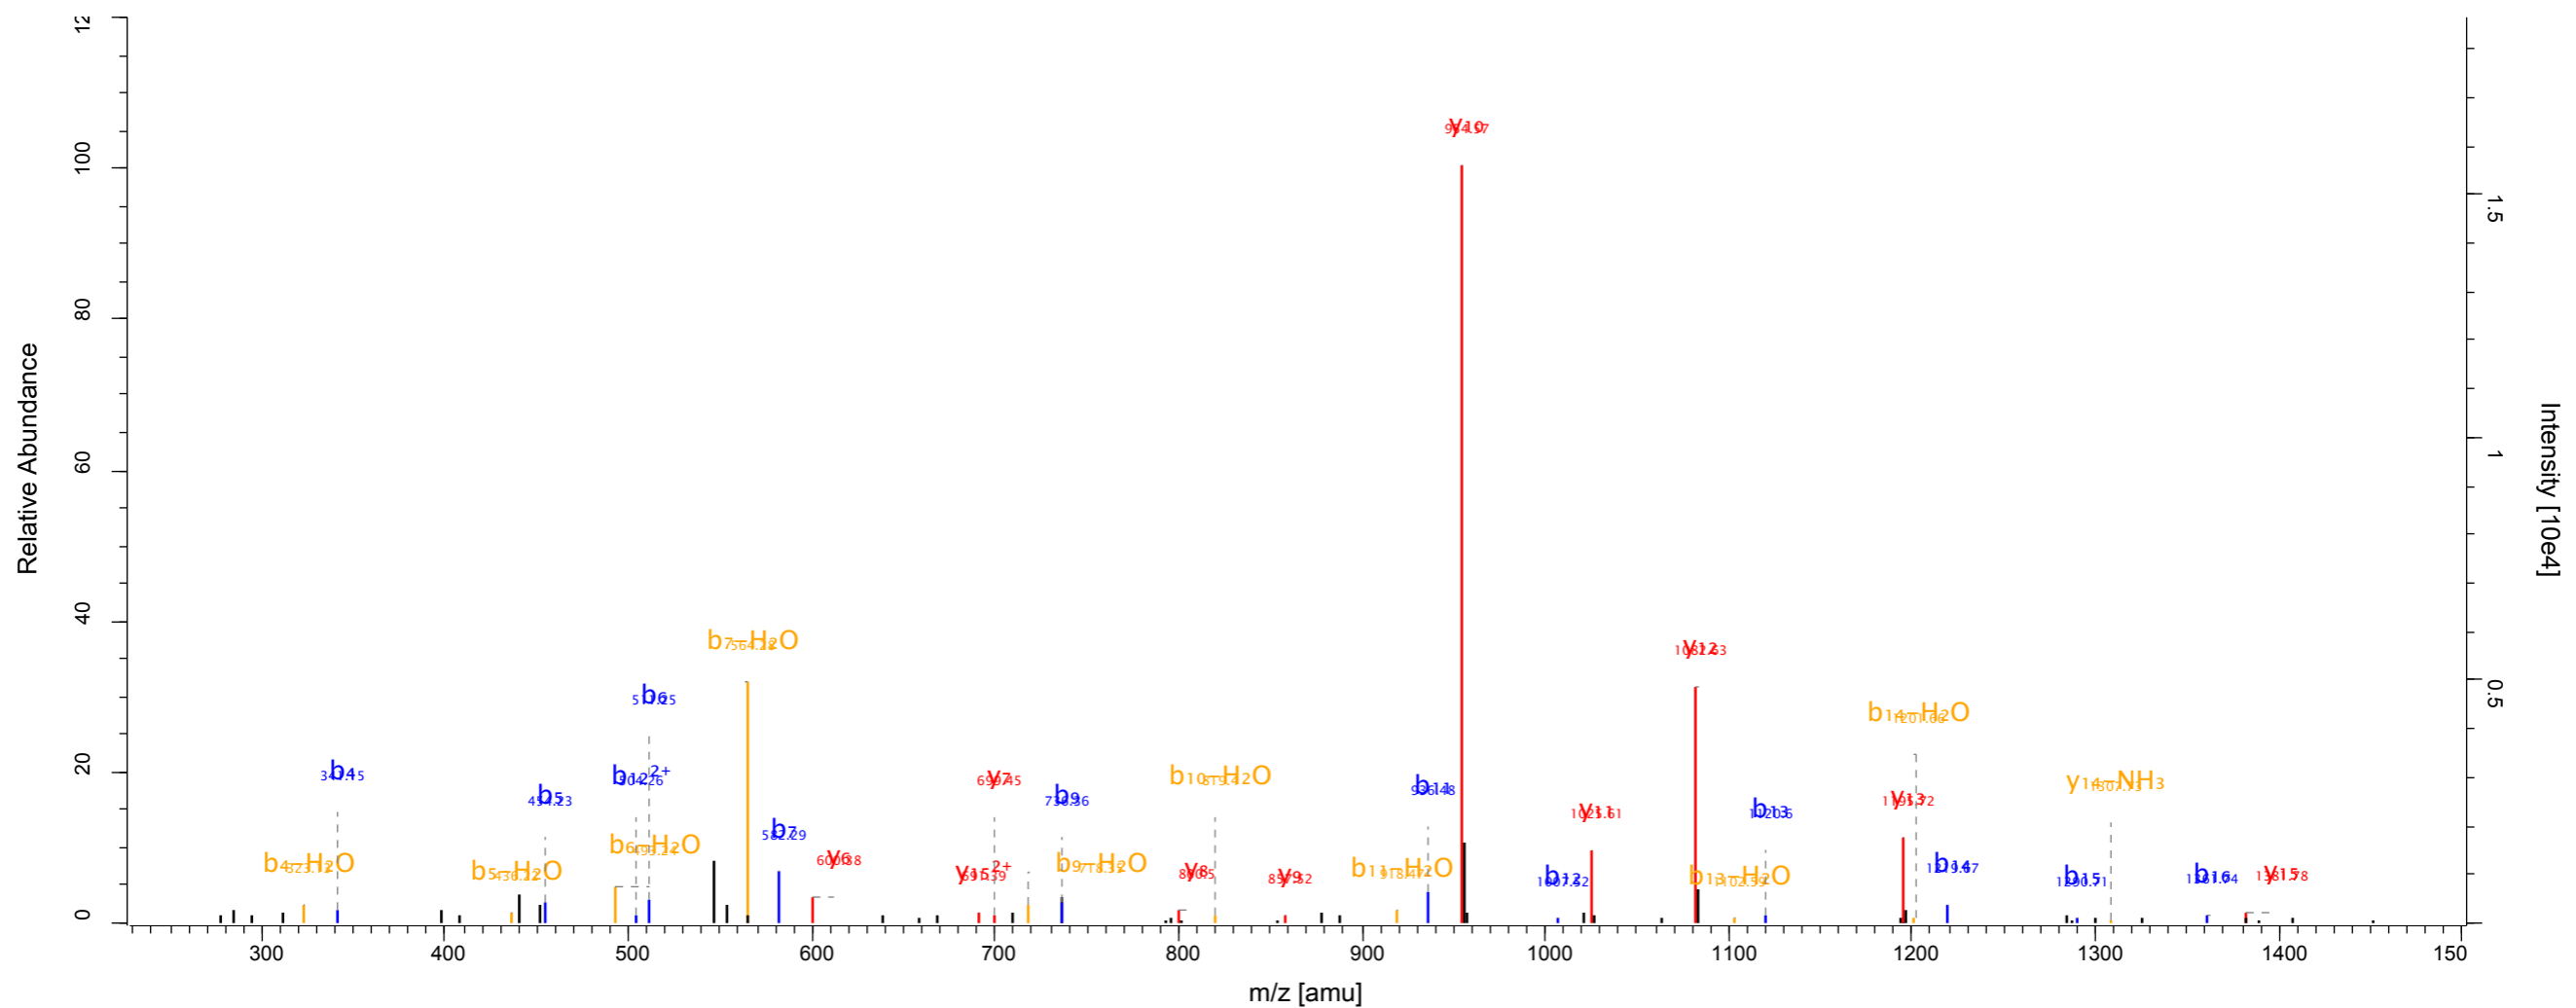

precursor information

|                   |                 |
|-------------------|-----------------|
| Mass:             | 1524.84602      |
| m/z:              | 768.42074       |
| Charge:           | 2+              |
| Retention time:   | 77.555702762207 |
| Score:            | 182.0156        |
| Mass Error [ppm]: | 0.12251         |
| PEP:              | 1.2220E-26      |
| Precursor Type:   | MULTI           |

| b <sup>2+</sup> ion |              | b ion      |              |    |     |    | y ion        |            | y <sup>2+</sup> ion |            |
|---------------------|--------------|------------|--------------|----|-----|----|--------------|------------|---------------------|------------|
| Δ dalton            | mass         | Δ dalton   | mass         |    | seq |    | Δ dalton     | mass       | Δ dalton            | mass       |
|                     | 58.02874019  |            | 58.02874019  | 1  | G   | 16 |              |            |                     |            |
|                     | 155.08150404 |            | 155.08150404 | 2  | P   | 15 | 1478.8325536 |            | 1478.8325536        |            |
|                     | 212.10296777 |            | 212.10296777 | 3  | G   | 14 | 1381.7797897 | -0.1384323 | 691.39353309        | +0.1330172 |
|                     | 341.14556086 | -0.0226971 | 341.14556086 | 4  | E   | 13 | 1324.758326  |            | 1324.758326         |            |
|                     | 454.22962484 | -0.0585433 | 454.22962484 | 5  | I   | 12 | 1195.7157329 | -0.0455669 | 1195.7157329        |            |
|                     | 511.25108857 | -0.1708884 | 511.25108857 | 6  | G   | 11 | 1082.6316689 | -0.0551308 | 1082.6316689        |            |
|                     | 582.28820235 | -0.1094304 | 582.28820235 | 7  | A   | 10 | 1025.6102052 | +0.0147948 | 1025.6102052        |            |
|                     | 679.34096621 |            | 679.34096621 | 8  | P   | 9  | 954.57309141 | -0.0334796 | 954.57309141        |            |
|                     | 736.36242993 | +0.3713958 | 736.36242993 | 9  | G   | 8  | 857.52032755 | +0.1377535 | 857.52032755        |            |
|                     | 837.4101084  |            | 837.4101084  | 10 | T   | 7  | 800.49886383 | -0.0486075 | 800.49886383        |            |
|                     | 936.47852232 | -0.0004339 | 936.47852232 | 11 | V   | 6  | 699.45118536 | -0.2041761 | 699.45118536        |            |
| -0.2824524          | 504.26145629 | -0.2375599 | 1007.5156361 | 12 | A   | 5  | 600.38277144 | +0.0793257 | 600.38277144        |            |
|                     | 1120.5997001 | +0.2036446 | 1120.5997001 | 13 | I   | 4  | 529.34565765 |            | 529.34565765        |            |
|                     | 1219.668114  | -0.2081531 | 1219.668114  | 14 | V   | 3  | 416.26159367 |            | 416.26159367        |            |
|                     | 1290.7052278 | -0.4023713 | 1290.7052278 | 15 | A   | 2  | 317.19317976 |            | 317.19317976        |            |
|                     | 1361.7423416 | -0.2682205 | 1361.7423416 | 16 | A   | 1  | 246.15606597 |            | 246.15606597        |            |
|                     |              |            |              | 17 | R   | 0  | 175.11895218 |            | 175.11895218        |            |

general information

|                       |           |
|-----------------------|-----------|
| Annotation:           | 14 of 17  |
| AminoAcids Coverage:  | 82 %      |
| Intensity Coverage:   | 78 %      |
| Peak Coverage:        | 45 %      |
| Protein Localisation: | 16 ... 32 |

Scan number 14123 Raw file 20081219\_orbi2\_WeStr\_COLLAB\_ADH\_FN\_Exp\_2\_InGel\_18  
 Method ITMS; CID Genenames SRGN

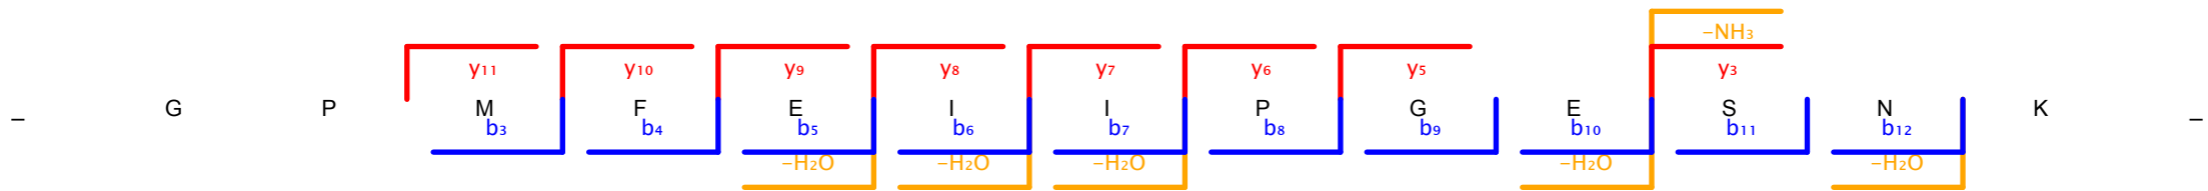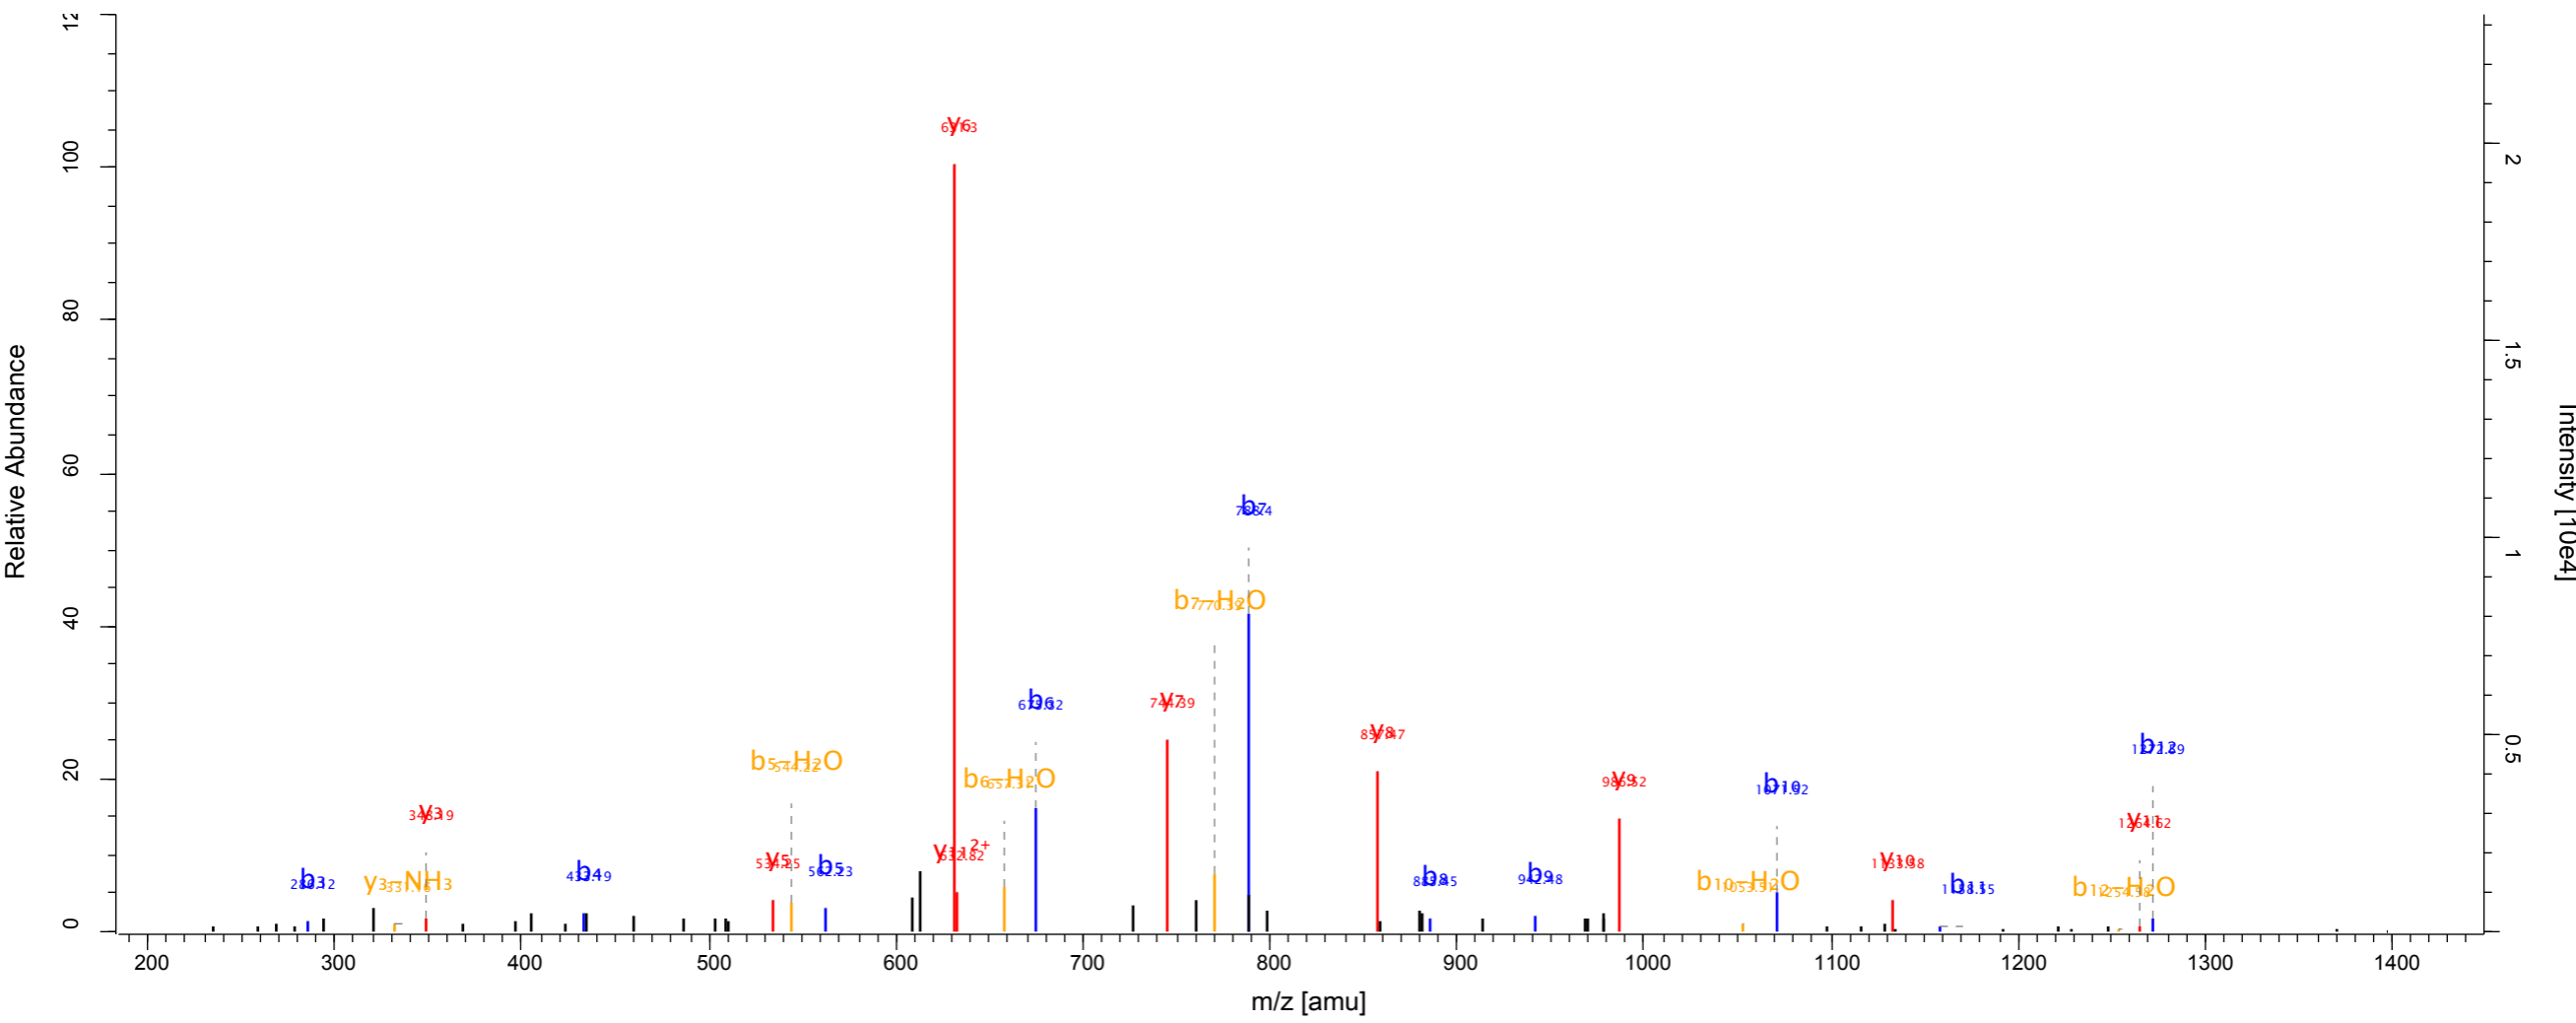

precursor information

|                   |               |
|-------------------|---------------|
| Mass:             | 1417.69115    |
| m/z:              | 700.85285     |
| Charge:           | 2+            |
| Retentiontime:    | 07.0224600275 |
| Score:            | 176.7758      |
| Mass Error (ppm): | -0.0015762    |
| PEP:              | 6.8521E-08    |
| Precursor Type:   | ISO           |

general information

|                       |           |
|-----------------------|-----------|
| Annotation:           | 10 of 12  |
| AminoAcids Coverage:  | 77 %      |
| Intensity Coverage:   | 70 %      |
| Peak Coverage:        | 28 %      |
| Protein Localisation: | 54 ... 66 |

| b ion      |                |    |     |    | y ion          |            | y <sup>2+</sup> ion |            |
|------------|----------------|----|-----|----|----------------|------------|---------------------|------------|
| Δ dalton   | mass           |    | seq |    | Δ dalton       | mass       | Δ dalton            | mass       |
|            | 58.02874019    | 1  | G   | 12 |                |            |                     |            |
|            | 155.081504042  | 2  | P   | 11 | 1361.676964131 |            | 1361.676964131      |            |
| +0.0294396 | 286.121988648  | 3  | M   | 10 | 1264.624200279 | -0.1611876 | 632.815738373       | -0.3165929 |
| +0.1575589 | 433.190402565  | 4  | F   | 9  | 1133.583715673 | -0.0959227 | 1133.583715673      |            |
| +0.1386474 | 562.232995661  | 5  | E   | 8  | 986.515301757  | -0.0292178 | 986.515301757       |            |
| -0.0574161 | 675.317059641  | 6  | I   | 7  | 857.47270866   | -0.0717077 | 857.47270866        |            |
| -0.0415655 | 788.401123622  | 7  | I   | 6  | 744.38864468   | +0.1039701 | 744.38864468        |            |
| -0.022552  | 885.453887474  | 8  | P   | 5  | 631.3045807    | +0.0240936 | 631.3045807         |            |
| +0.0204374 | 942.475351197  | 9  | G   | 4  | 534.251816848  | +0.004836  | 534.251816848       |            |
| -0.0804443 | 1071.517944293 | 10 | E   | 3  | 477.230353124  |            | 477.230353124       |            |
| -0.1102754 | 1158.549972703 | 11 | S   | 2  | 348.187760028  | -0.0564124 | 348.187760028       |            |
| -0.113408  | 1272.59290015  | 12 | N   | 1  | 261.155731618  |            | 261.155731618       |            |
|            |                | 13 | K   | 0  | 147.112804171  |            | 147.112804171       |            |

Scan number 3063 Raw file 20091015\_Orbi6\_MaHe\_SA\_ADH\_exp3\_Susp\_Gel01\_091017141217  
 Method ITMS; CID Genenames HILPDA

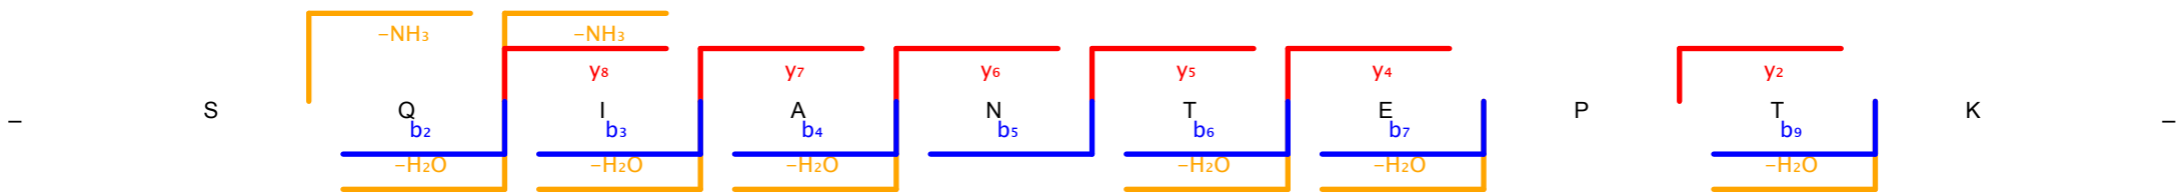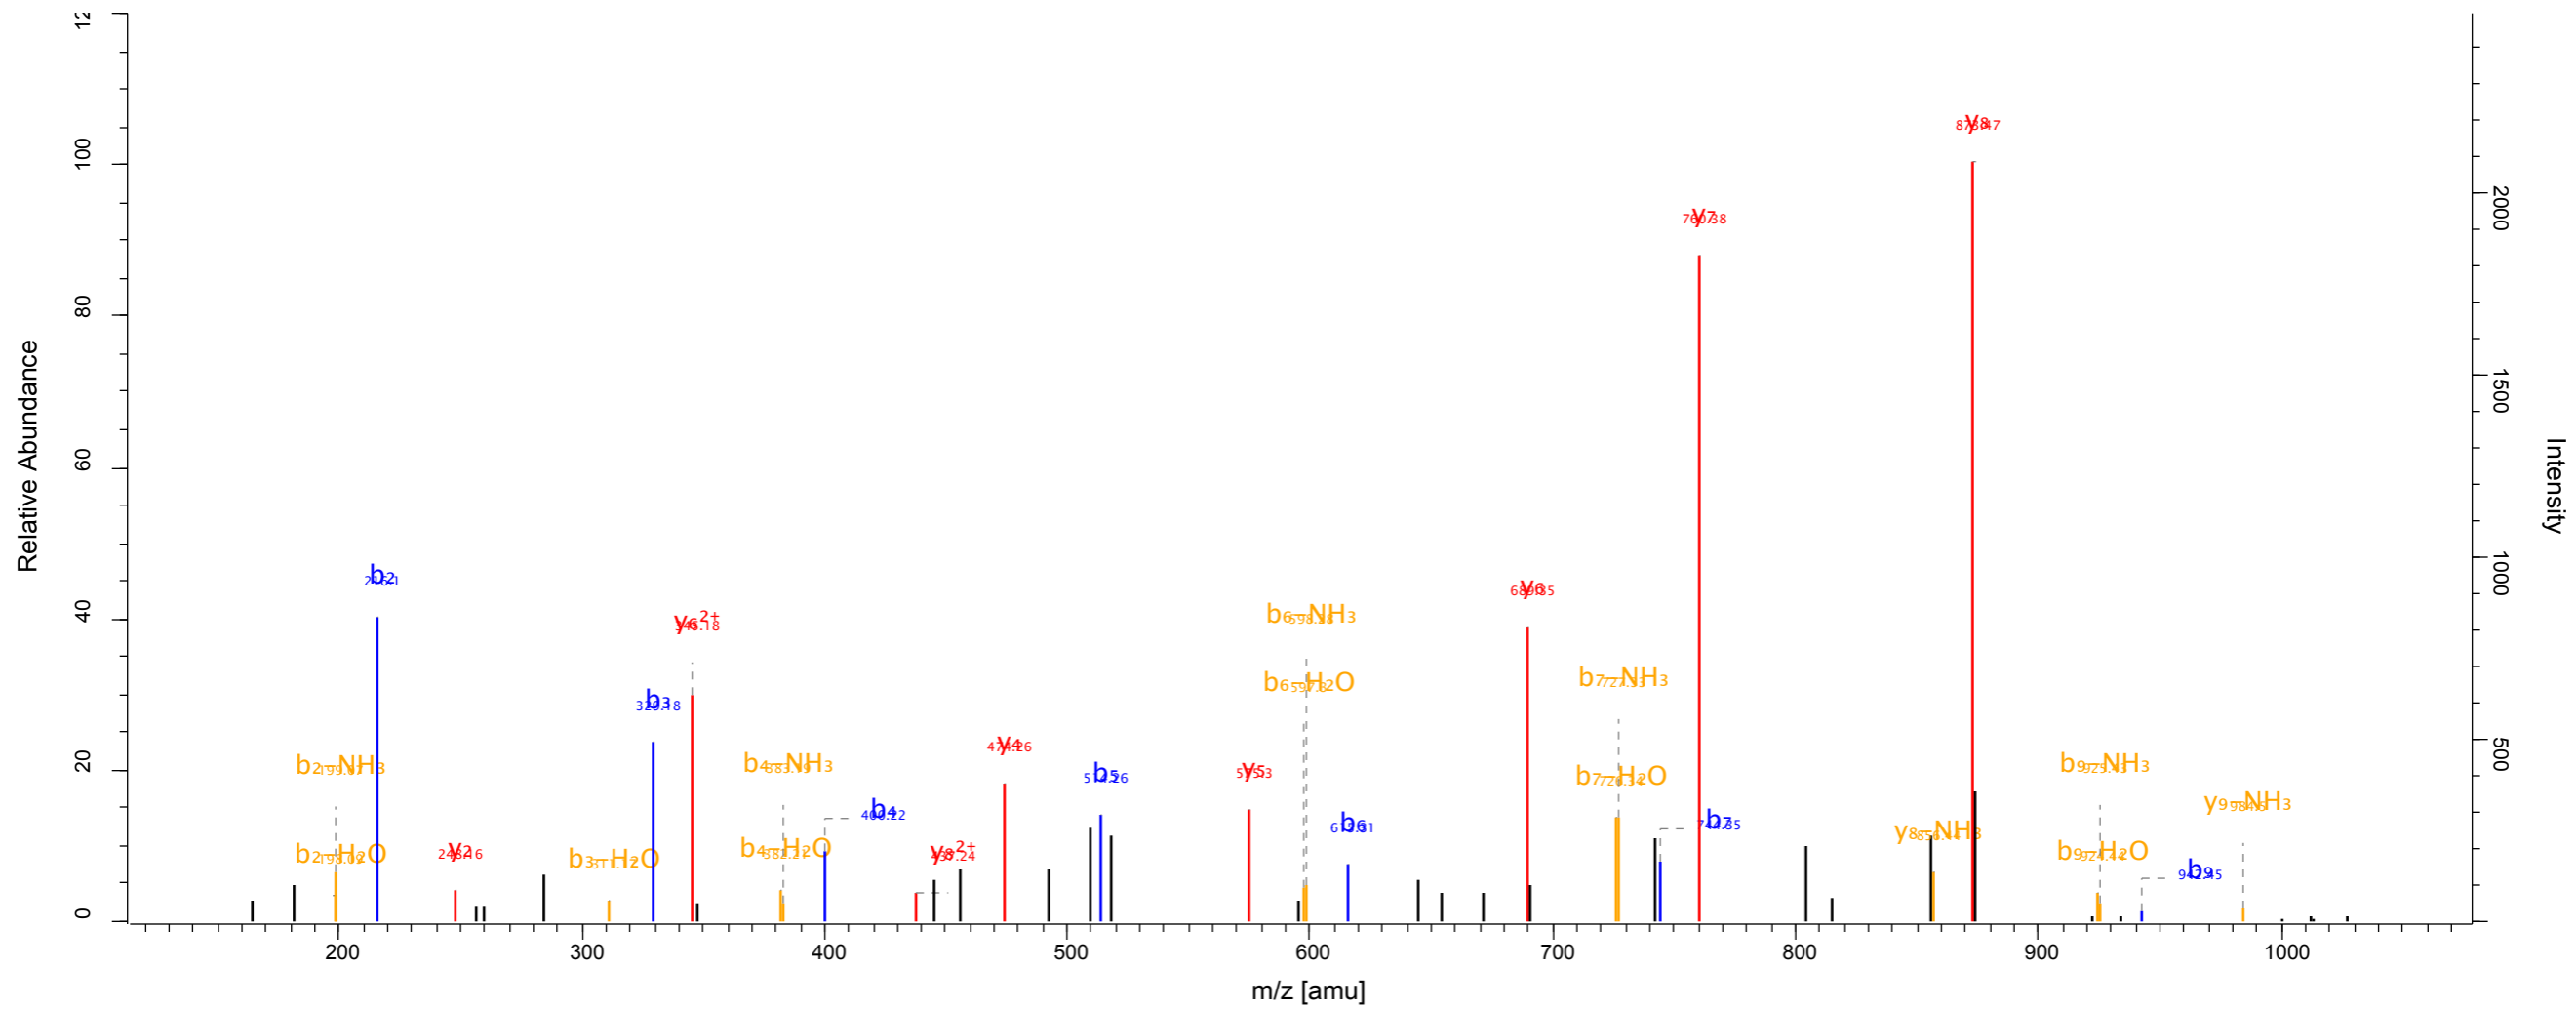

precursor information

|                       |                  |
|-----------------------|------------------|
| Mass:                 | 1087.55121       |
| m/z:                  | 544.78288        |
| Charge:               | 2+               |
| Retention time:       | 20.8008804321280 |
| Score:                | 225.6710         |
| Mass Error (ppm):     | 0.23858          |
| DED:                  | 5.84825_31       |
| 96 Precursor Type:    | MULTI            |
| Annotation:           | 8 of 10          |
| AminoAcids Coverage:  | 80 %             |
| Intensity Coverage:   | 77 %             |
| Peak Coverage:        | 51 %             |
| Protein Localisation: | 44 ... 53        |

| b ion      |               |    |     |   | y ion          |            | y <sup>2+</sup> ion |            |
|------------|---------------|----|-----|---|----------------|------------|---------------------|------------|
| Δ dalton   | mass          |    | seq |   | Δ dalton       | mass       | Δ dalton            | mass       |
|            | 88.039304876  | 1  | S   | 9 |                |            |                     |            |
| +0.0620145 | 216.097882388 | 2  | Q   | 8 | 1001.526200794 |            | 1001.526200794      |            |
| -0.0307623 | 329.181946368 | 3  | I   | 7 | 873.467623282  | -0.0880456 | 437.237449875       | +0.0682142 |
| -0.0504811 | 400.219060156 | 4  | A   | 6 | 760.383559302  | -0.0520163 | 760.383559302       |            |
| -0.2666263 | 514.261987603 | 5  | N   | 5 | 689.346445514  | -0.0066018 | 345.17686099        | -0.0005304 |
| +0.0401874 | 615.309666077 | 6  | T   | 4 | 575.303518067  | +0.0306494 | 575.303518067       |            |
| -0.0160775 | 744.352259174 | 7  | E   | 3 | 474.255839593  | +0.0686843 | 474.255839593       |            |
|            | 841.405023026 | 8  | P   | 2 | 345.213246497  |            | 345.213246497       |            |
| +0.1052209 | 942.4527015   | 9  | T   | 1 | 248.160482645  | -0.0383818 | 248.160482645       |            |
|            |               | 10 | K   | 0 | 147.112804171  |            | 147.112804171       |            |

Scan number 3063 Raw file 20091015\_Orbi6\_MaHe\_SA\_ADH\_exp3\_Susp\_Gel01\_091017141217  
 Method ITMS; CID Genenames HILPDA

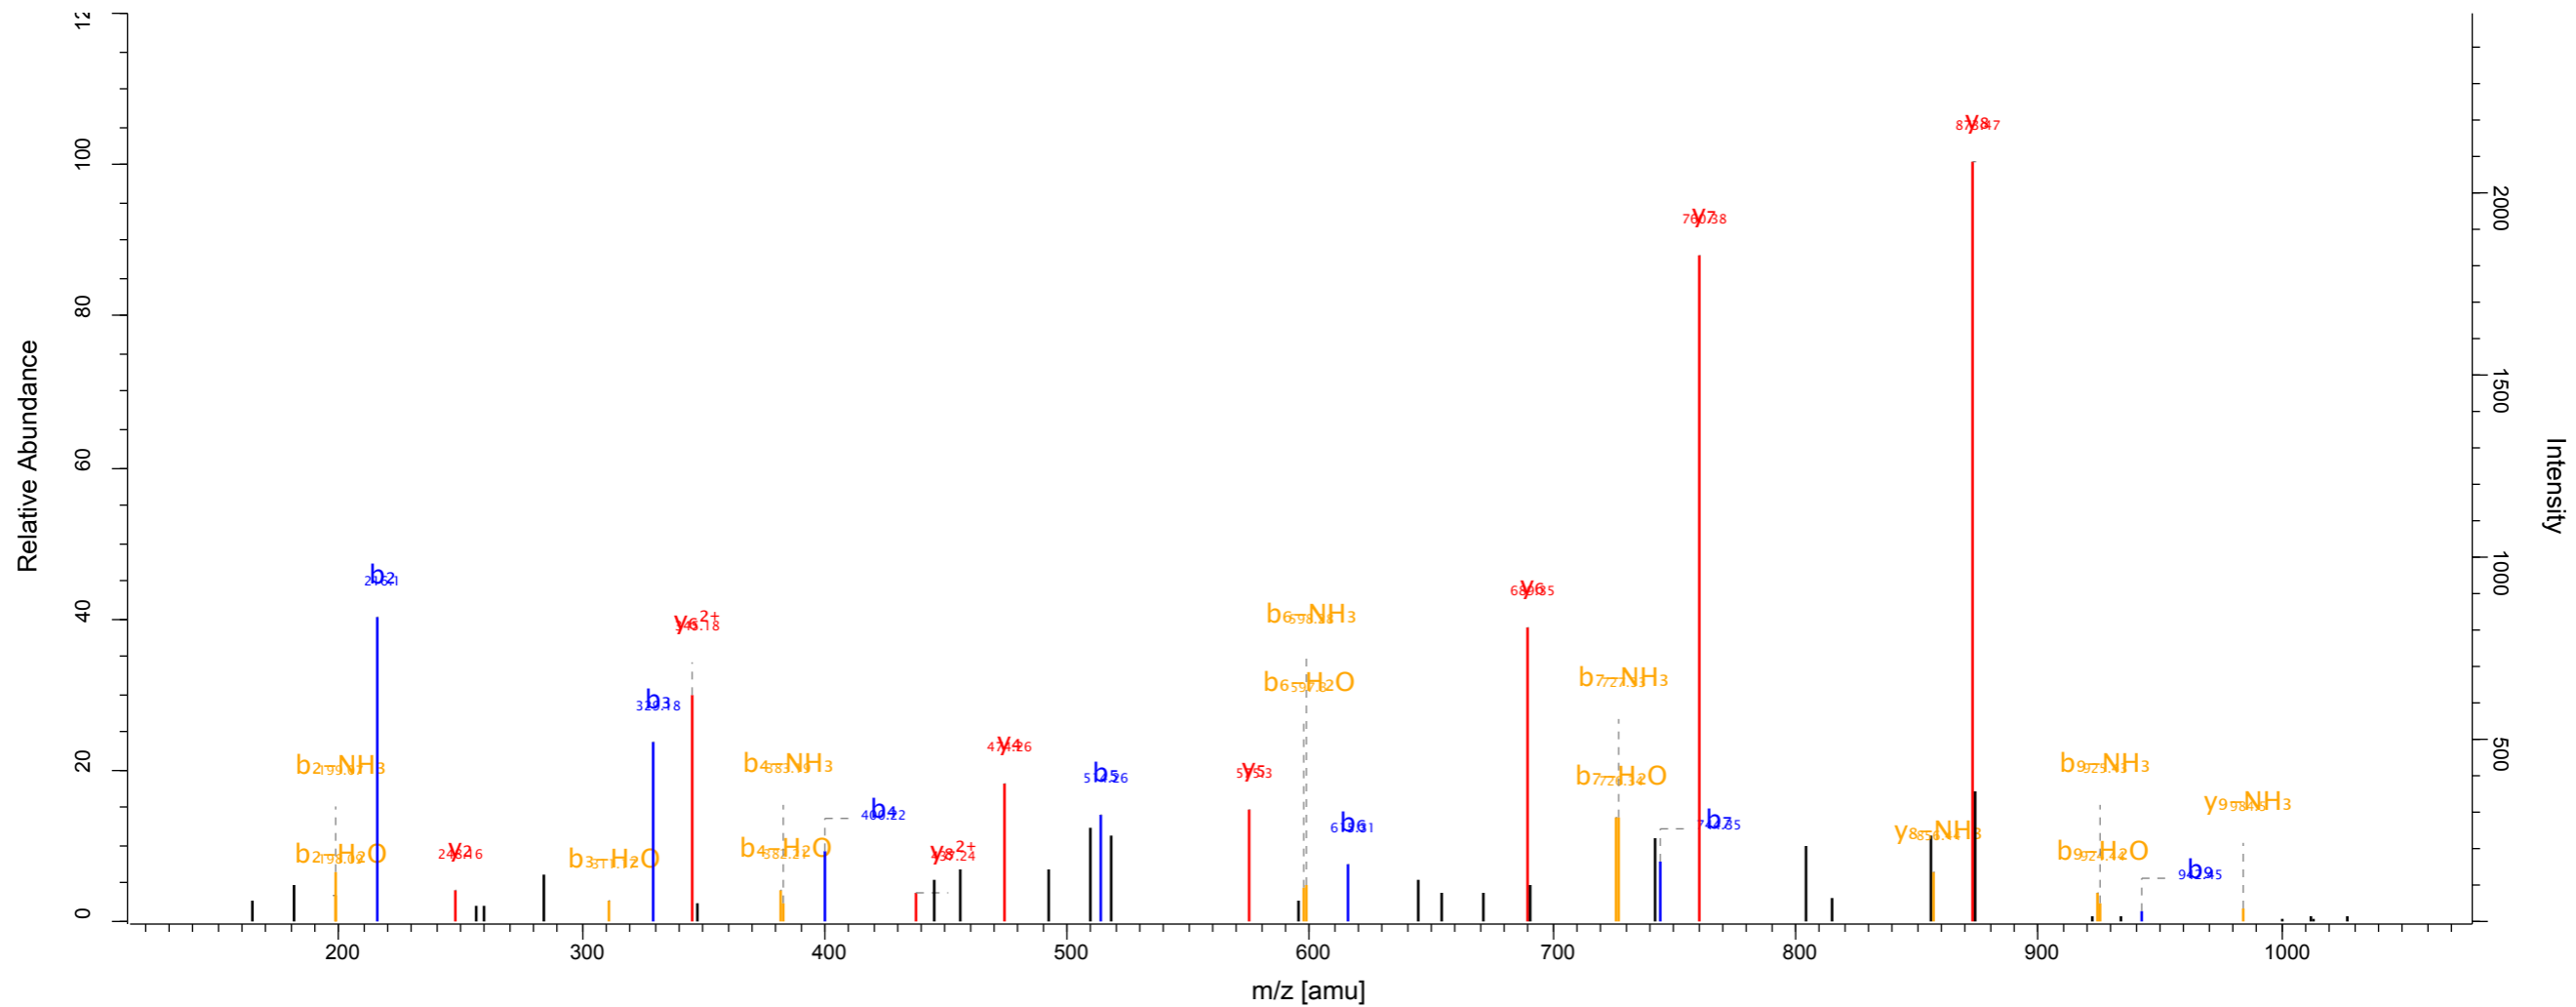

precursor information

|                       |                  |
|-----------------------|------------------|
| Mass:                 | 1087.55121       |
| m/z:                  | 544.78288        |
| Charge:               | 2+               |
| Retention time:       | 20.8008804321280 |
| Score:                | 225.6710         |
| Mass Error (ppm):     | 0.23858          |
| DED:                  | 5.84825_31       |
| 96 Precursor Type:    | MULTI            |
| Annotation:           | 8 of 10          |
| AminoAcids Coverage:  | 80 %             |
| Intensity Coverage:   | 77 %             |
| Peak Coverage:        | 51 %             |
| Protein Localisation: | 44 ... 53        |

| b ion      |               |    |     |   | y ion          |            | y <sup>2+</sup> ion |            |
|------------|---------------|----|-----|---|----------------|------------|---------------------|------------|
| Δ dalton   | mass          |    | seq |   | Δ dalton       | mass       | Δ dalton            | mass       |
|            | 88.039304876  | 1  | S   | 9 |                |            |                     |            |
| +0.0620145 | 216.097882388 | 2  | Q   | 8 | 1001.526200794 |            | 1001.526200794      |            |
| -0.0307623 | 329.181946368 | 3  | I   | 7 | 873.467623282  | -0.0880456 | 437.237449875       | +0.0682142 |
| -0.0504811 | 400.219060156 | 4  | A   | 6 | 760.383559302  | -0.0520163 | 760.383559302       |            |
| -0.2666263 | 514.261987603 | 5  | N   | 5 | 689.346445514  | -0.0066018 | 345.17686099        | -0.0005304 |
| +0.0401874 | 615.309666077 | 6  | T   | 4 | 575.303518067  | +0.0306494 | 575.303518067       |            |
| -0.0160775 | 744.352259174 | 7  | E   | 3 | 474.255839593  | +0.0686843 | 474.255839593       |            |
|            | 841.405023026 | 8  | P   | 2 | 345.213246497  |            | 345.213246497       |            |
| +0.1052209 | 942.4527015   | 9  | T   | 1 | 248.160482645  | -0.0383818 | 248.160482645       |            |
|            |               | 10 | K   | 0 | 147.112804171  |            | 147.112804171       |            |

Scan number 18233 Raw file 20091015\_Orbi6\_MaHe\_SA\_ADH\_exp3\_Susp\_Gel03\_091017190504  
 Method ITMS; CID Genenames FAIM

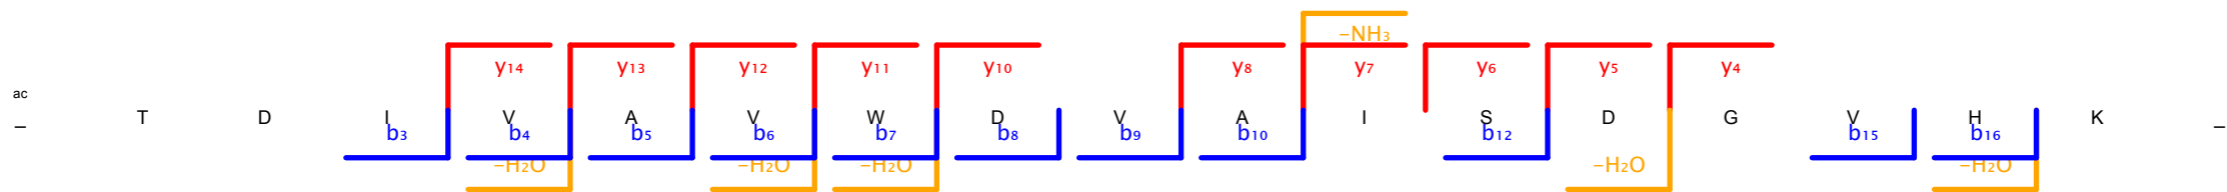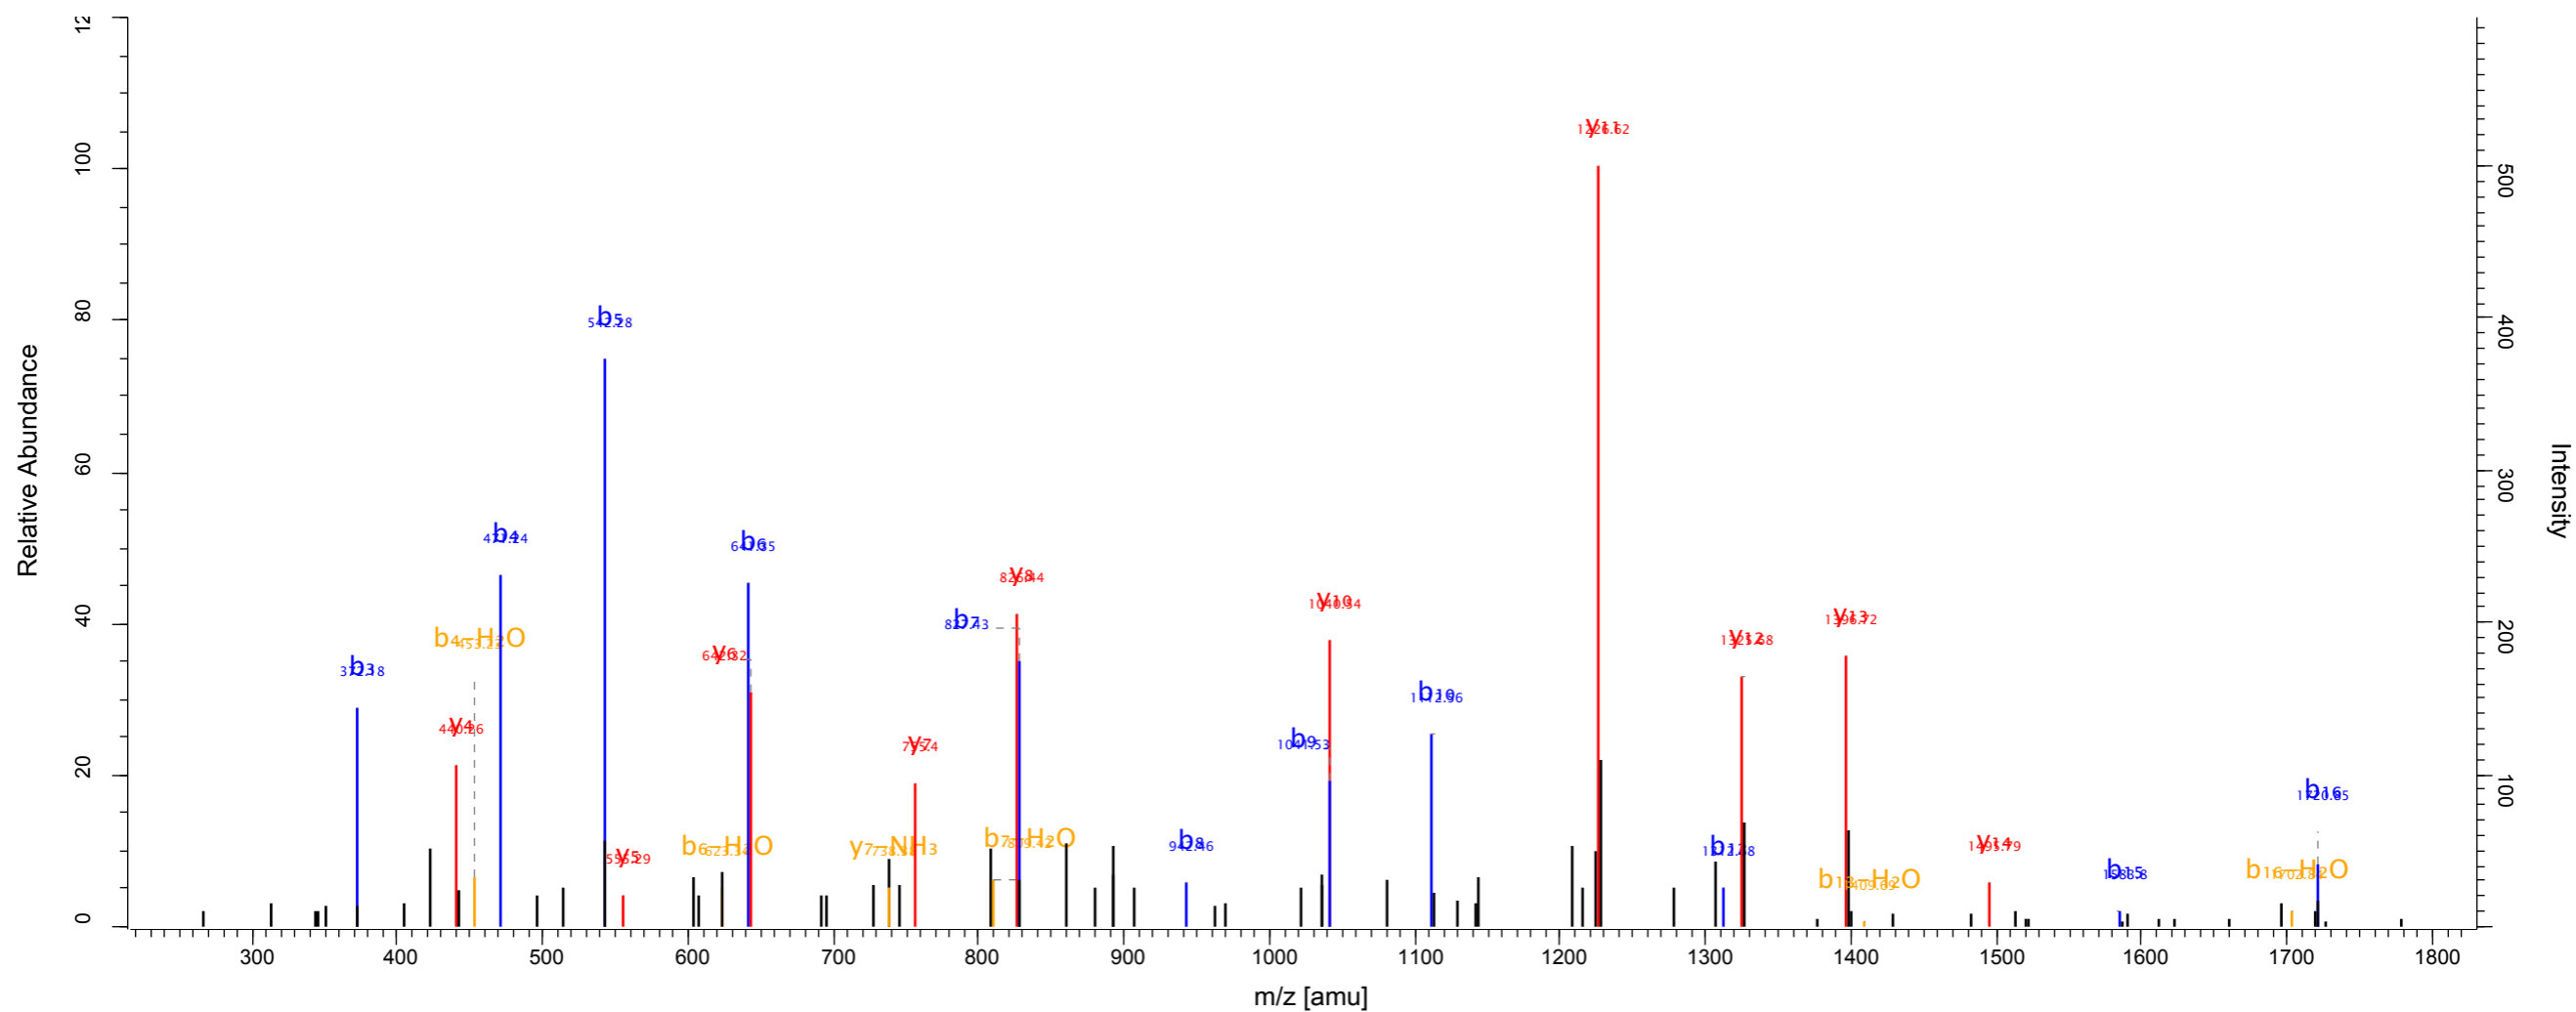

precursor information

|                   |                  |
|-------------------|------------------|
| Mass:             | 0                |
| m/z:              | 022.08236        |
| Charge:           | 0                |
| Retention time:   | 118.851066580255 |
| Score:            | 148.701          |
| Mass Error [ppm]: | 0.086170         |
| PEP:              | 2.2722E-09       |
| Precursor Type:   | PEAK             |

| b ion      |                |    |     |    | y ion          |            |  |
|------------|----------------|----|-----|----|----------------|------------|--|
| Δ dalton   | mass           |    | seq |    | Δ dalton       | mass       |  |
|            | 144.065519627  | 1  | T   | 16 |                |            |  |
|            | 259.092462659  | 2  | D   | 15 | 1723.901361417 |            |  |
| -0.1727119 | 372.176526639  | 3  | I   | 14 | 1608.874418385 |            |  |
| -0.2986515 | 471.244940556  | 4  | V   | 13 | 1495.790354405 | +0.1846212 |  |
| -0.2448839 | 542.282054343  | 5  | A   | 12 | 1396.721940489 | -0.1837325 |  |
| -0.3054853 | 641.35046826   | 6  | V   | 11 | 1325.684826701 | -0.20448   |  |
| +0.0131509 | 827.429781213  | 7  | W   | 10 | 1226.616412785 | -0.0937077 |  |
| -0.1644269 | 942.456724245  | 8  | D   | 9  | 1040.537099831 | -0.0255032 |  |
| -0.0263589 | 1041.525138161 | 9  | V   | 8  | 925.510156799  |            |  |
| -0.4343223 | 1112.562251949 | 10 | A   | 7  | 826.441742883  | -0.0263986 |  |
|            | 1225.64631593  | 11 | I   | 6  | 755.404629095  | -0.0380519 |  |
| -0.4245602 | 1312.678344339 | 12 | S   | 5  | 642.320565115  | -0.0167931 |  |
|            | 1427.705287371 | 13 | D   | 4  | 555.288536705  | -0.1852652 |  |
|            | 1484.726751095 | 14 | G   | 3  | 440.261593673  | -0.0887421 |  |
| +0.1085215 | 1583.795165011 | 15 | V   | 2  | 383.240129949  |            |  |
| -0.2849851 | 1720.854076874 | 16 | H   | 1  | 284.171716033  |            |  |
|            |                | 17 | K   | 0  | 147.112804171  |            |  |

general information

|                       |          |
|-----------------------|----------|
| Annotation:           | 14 of 17 |
| AminoAcids Coverage:  | 82 %     |
| Intensity Coverage:   | 67 %     |
| Peak Coverage:        | 20 %     |
| Protein Localisation: | 2 ... 18 |

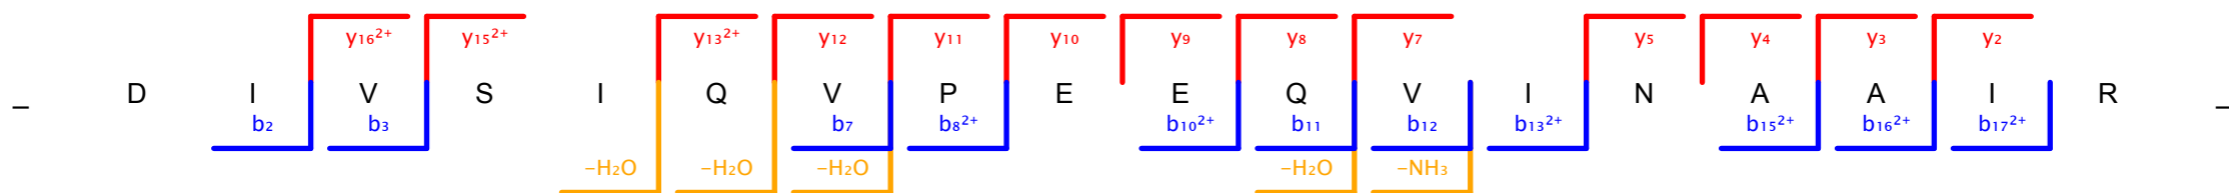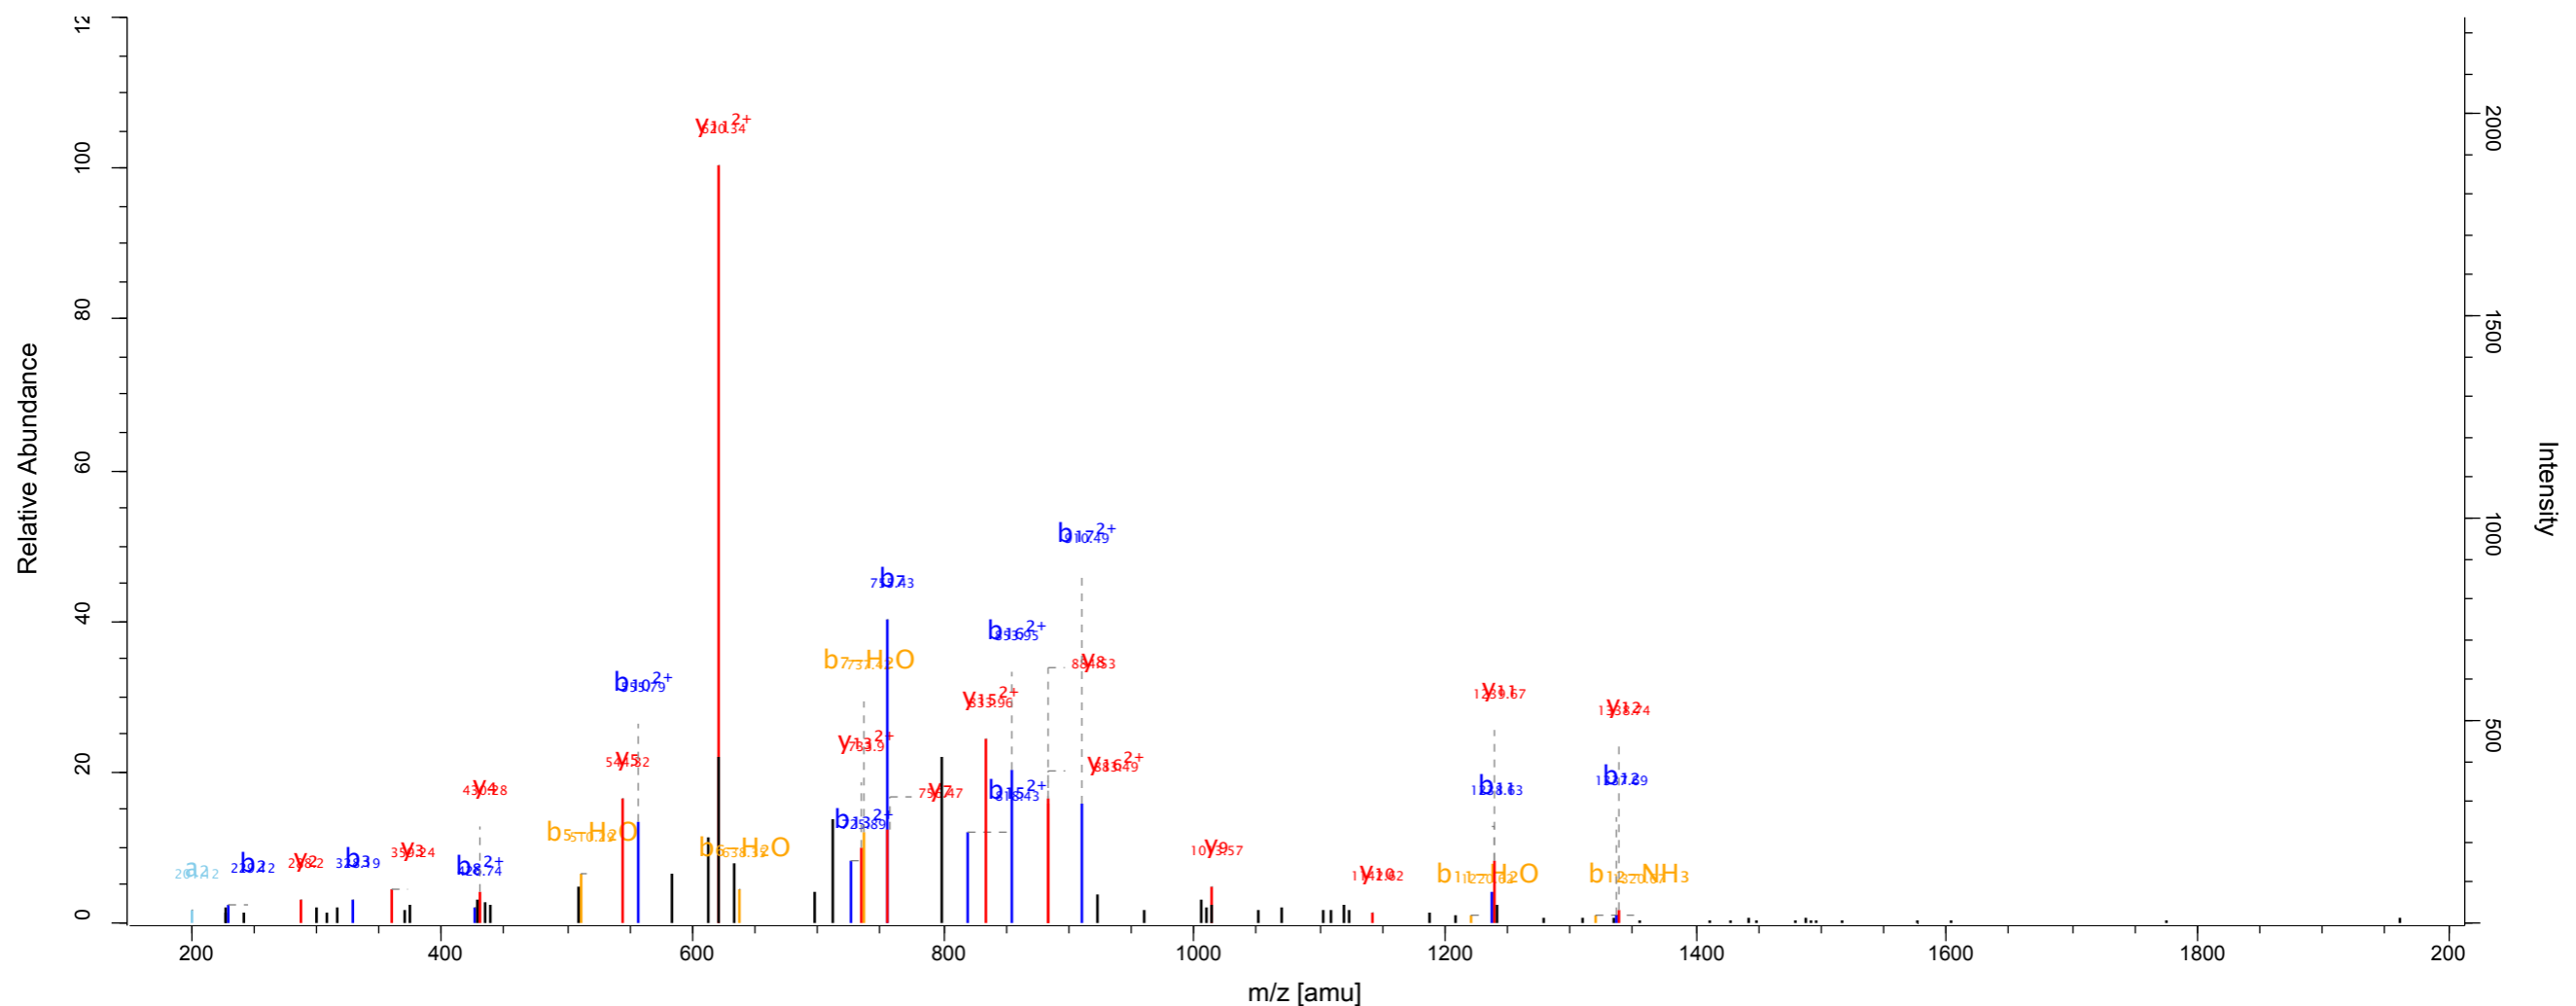

precursor information

|                   |                  |
|-------------------|------------------|
| Mass:             | 1002.08561       |
| m/z:              | 665.26015        |
| Charge:           | 2+               |
| Potenttime:       | 112.845771780551 |
| Score:            | 167.6136         |
| Mass Error (ppm): | 0.60641          |
| DEP:              | 1.5250E-12       |
| Precursor Type:   | ISO              |

| a ion      |            | b <sup>2+</sup> ion |            | b ion      |            |    |     |    | y ion      |            | y <sup>2+</sup> ion |            |
|------------|------------|---------------------|------------|------------|------------|----|-----|----|------------|------------|---------------------|------------|
| Δ dalton   | mass       | Δ dalton            | mass       | Δ dalton   | mass       |    | seq |    | Δ dalton   | mass       | Δ dalton            | mass       |
|            | 88.0393049 |                     | 116.034219 |            | 116.034219 | 1  | D   | 17 |            |            |                     |            |
| +0.0104507 | 201.123369 |                     | 229.118283 | -0.0247624 | 229.118283 | 2  | I   | 16 | 1879.06474 |            | 1879.06474          |            |
|            | 300.191783 |                     | 328.186697 | +0.0642792 | 328.186697 | 3  | V   | 15 | 1765.98067 |            | 883.493975          | -0.2927425 |
|            | 387.223811 |                     | 415.218726 |            | 415.218726 | 4  | S   | 14 | 1666.91226 |            | 833.959768          | -0.0508329 |
|            | 500.307875 |                     | 528.30279  |            | 528.30279  | 5  | I   | 13 | 1579.88023 |            | 1579.88023          |            |
|            | 628.366453 |                     | 656.361367 |            | 656.361367 | 6  | Q   | 12 | 1466.79617 |            | 733.901722          | -0.1013683 |
|            | 727.434867 |                     | 755.429781 | -0.1175864 | 755.429781 | 7  | V   | 11 | 1338.73759 | +0.0883372 | 1338.73759          |            |
|            | 824.48763  | +0.4085316          | 426.744911 |            | 852.482545 | 8  | P   | 10 | 1239.66918 | +0.0189337 | 620.338227          | -0.0105288 |
|            | 953.530224 |                     | 981.525138 |            | 981.525138 | 9  | E   | 9  | 1142.61641 | +0.0110286 | 1142.61641          |            |
|            | 1082.57282 | -0.0130898          | 555.787504 |            | 1110.56773 | 10 | E   | 8  | 1013.57382 | -0.1412025 | 1013.57382          |            |
|            | 1210.63139 |                     | 1238.62631 | -0.3044094 | 1238.62631 | 11 | Q   | 7  | 884.531227 | -0.4825816 | 884.531227          |            |
|            | 1309.69981 |                     | 1337.69472 | -0.1017051 | 1337.69472 | 12 | V   | 6  | 756.472649 | -0.1330495 | 756.472649          |            |
|            | 1422.78387 | -0.2372698          | 725.893032 |            | 1450.77879 | 13 | I   | 5  | 657.404235 |            | 657.404235          |            |
|            | 1536.8268  |                     | 1564.82171 |            | 1564.82171 | 14 | N   | 4  | 544.320171 | +0.0016672 | 544.320171          |            |
|            | 1607.86391 | +0.0860518          | 818.433052 |            | 1635.85883 | 15 | A   | 3  | 430.277244 | +0.0259789 | 430.277244          |            |
|            | 1678.90103 | -0.0368752          | 853.951609 |            | 1706.89594 | 16 | A   | 2  | 359.24013  | -0.1302667 | 359.24013           |            |
|            | 1791.98509 | +0.0979117          | 910.493641 |            | 1819.98001 | 17 | I   | 1  | 288.203016 | -0.0667857 | 288.203016          |            |
|            |            |                     |            |            |            | 18 | R   | 0  | 175.118952 |            | 175.118952          |            |

general information

|                       |             |
|-----------------------|-------------|
| Annotation:           | 16 of 18    |
| AminoAcids Coverage:  | 80.0%       |
| Intensity Coverage:   | 71.0%       |
| Peak Coverage:        | 28.0%       |
| Protein Localisation: | 163 ... 180 |



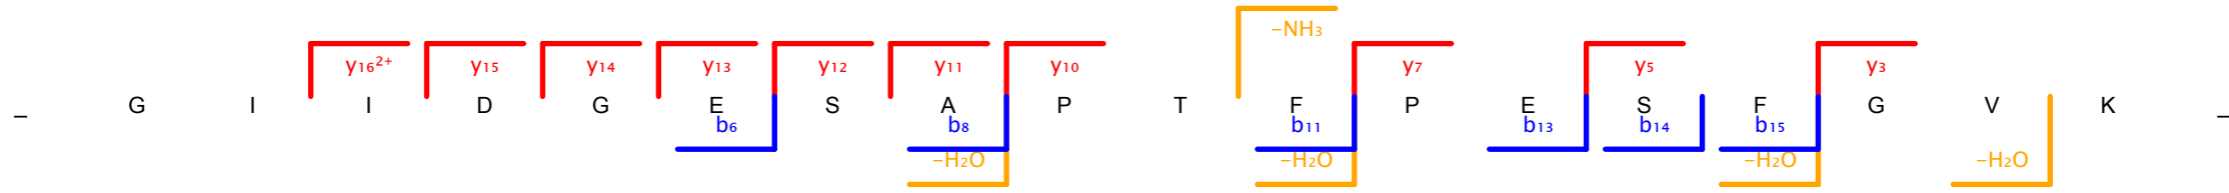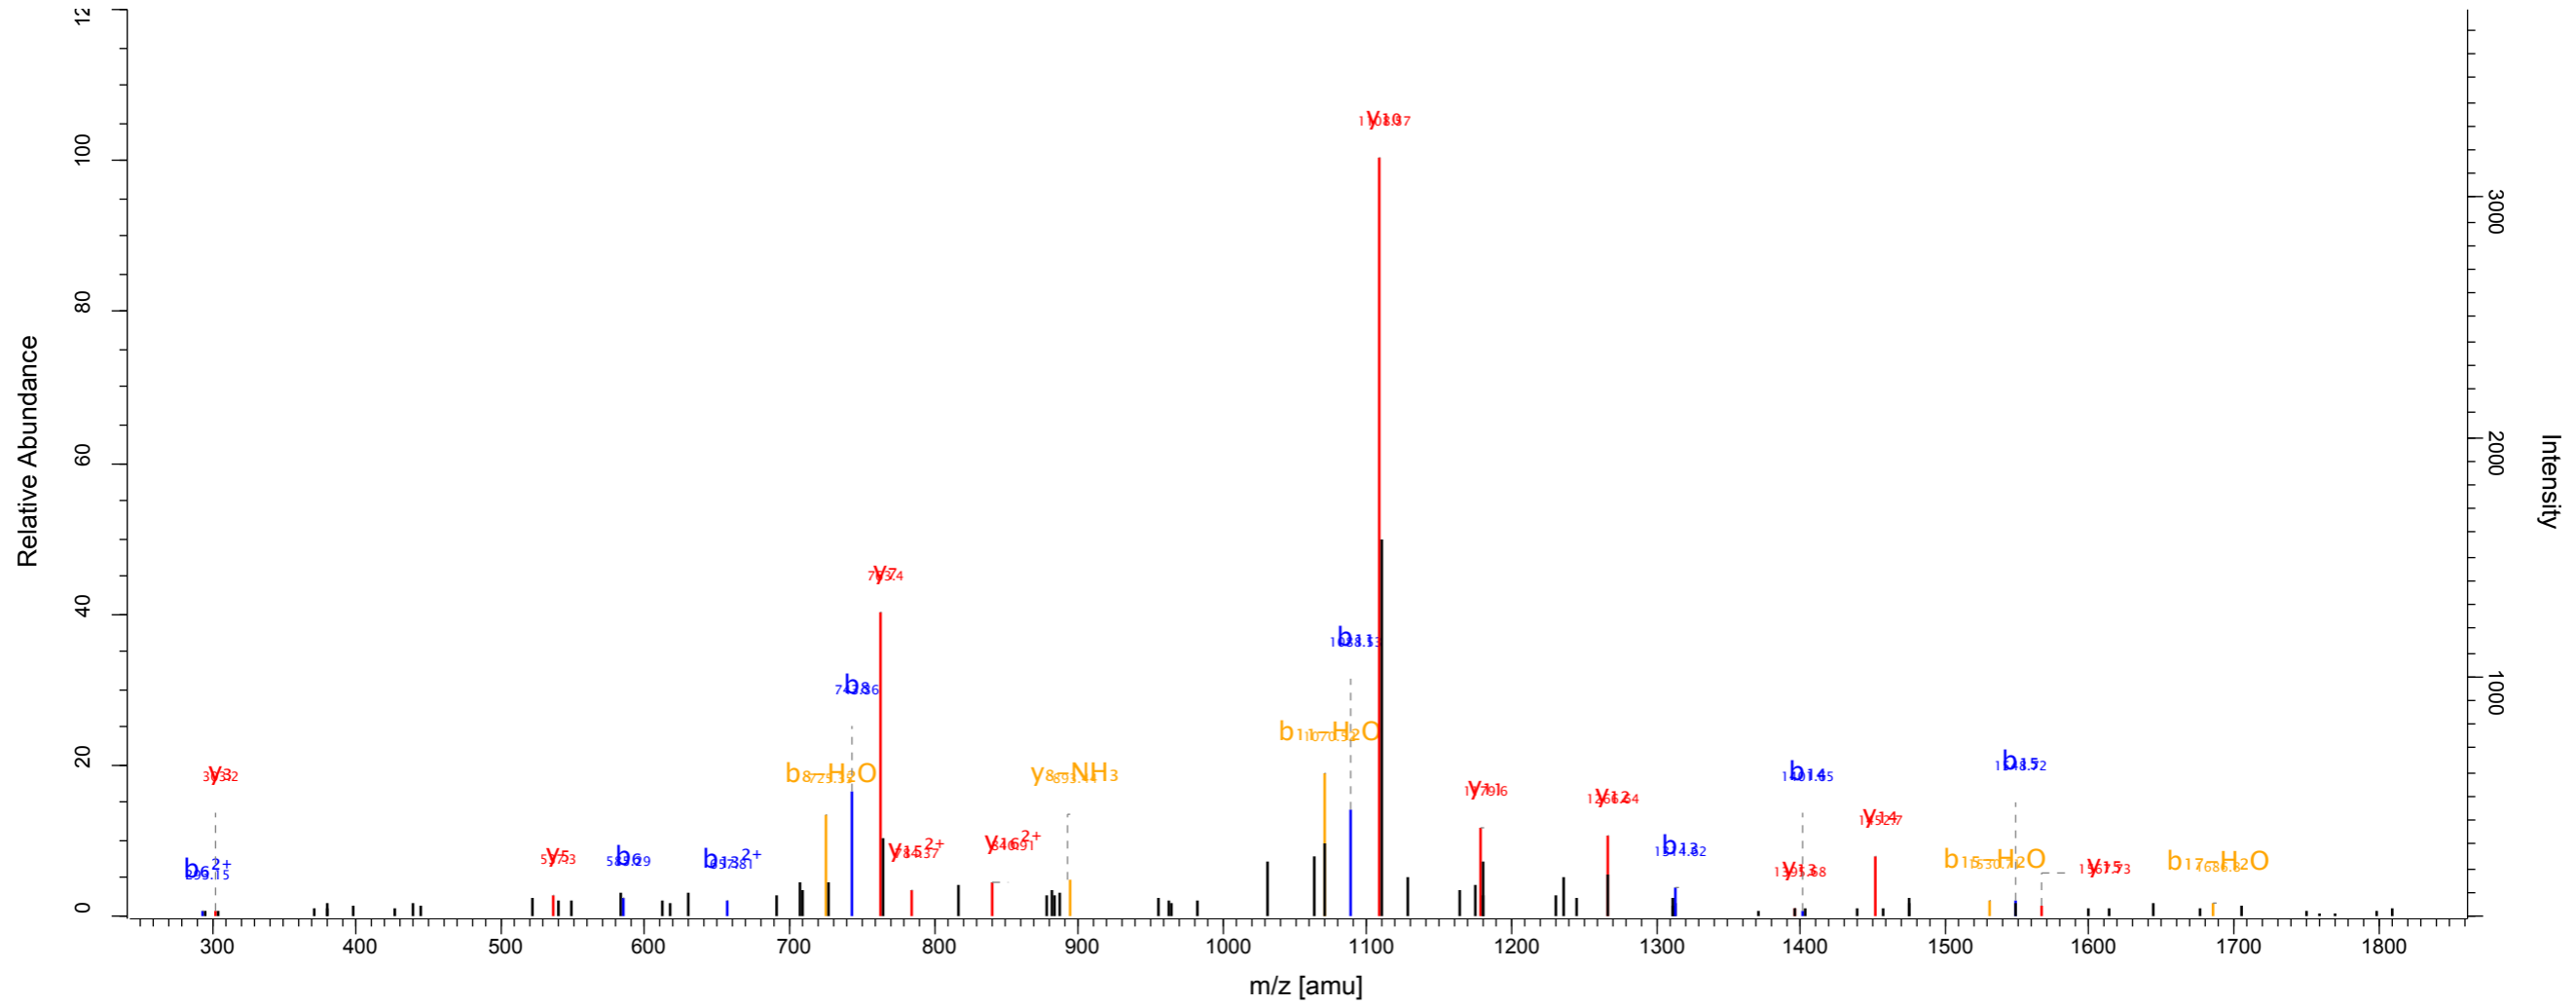

precursor information

|                   |                  |
|-------------------|------------------|
| Mass:             | 1840.01000       |
| m/z:              | 825.06222        |
| Charge:           | 2+               |
| Potenttime:       | 04.7759482886710 |
| Score:            | 112.064          |
| Mass Error (ppm): | 0.15722          |
| DEP:              | 2.82285_06       |
| Precursor Type:   | MULTI            |

| b <sup>2+</sup> ion |              | b ion      |              |    |     |    | y ion        |            | y <sup>2+</sup> ion |            |
|---------------------|--------------|------------|--------------|----|-----|----|--------------|------------|---------------------|------------|
| Δ dalton            | mass         | Δ dalton   | mass         |    | seq |    | Δ dalton     | mass       | Δ dalton            | mass       |
|                     | 58.02874019  |            | 58.02874019  | 1  | G   | 17 |              |            |                     |            |
|                     | 171.11280417 |            | 171.11280417 | 2  | I   | 16 | 1793.8956073 |            | 1793.8956073        |            |
|                     | 284.19686815 |            | 284.19686815 | 3  | I   | 15 | 1680.8115434 |            | 840.90940991        | +0.328322  |
|                     | 399.22381118 |            | 399.22381118 | 4  | D   | 14 | 1567.7274794 | -0.1450819 | 784.36737792        | +0.2267993 |
|                     | 456.24527491 |            | 456.24527491 | 5  | G   | 13 | 1452.7005363 | -0.2629143 | 1452.7005363        |            |
| +0.1156724          | 293.14757223 | -0.0432391 | 585.287868   | 6  | E   | 12 | 1395.6790726 | -0.157222  | 1395.6790726        |            |
|                     | 672.31989641 |            | 672.31989641 | 7  | S   | 11 | 1266.6364795 | -0.1009571 | 1266.6364795        |            |
|                     | 743.3570102  | -0.1169589 | 743.3570102  | 8  | A   | 10 | 1179.6044511 | -0.1990556 | 1179.6044511        |            |
|                     | 840.40977405 |            | 840.40977405 | 9  | P   | 9  | 1108.5673373 | -0.0723422 | 1108.5673373        |            |
|                     | 941.45745253 |            | 941.45745253 | 10 | T   | 8  | 1011.5145735 |            | 1011.5145735        |            |
|                     | 1088.5258664 | -0.1082639 | 1088.5258664 | 11 | F   | 7  | 910.466895   |            | 910.466895          |            |
|                     | 1185.5786303 |            | 1185.5786303 | 12 | P   | 6  | 763.39848108 | -0.1196115 | 763.39848108        |            |
| -0.4772748          | 657.81424993 | -0.347908  | 1314.6212234 | 13 | E   | 5  | 666.34571723 |            | 666.34571723        |            |
|                     | 1401.6532518 | -0.4793016 | 1401.6532518 | 14 | S   | 4  | 537.30312414 | -0.0362174 | 537.30312414        |            |
|                     | 1548.7216657 | +0.0271136 | 1548.7216657 | 15 | F   | 3  | 450.27109573 |            | 450.27109573        |            |
|                     | 1605.7431294 |            | 1605.7431294 | 16 | G   | 2  | 303.20268181 | +0.1865089 | 303.20268181        |            |
|                     | 1704.8115434 |            | 1704.8115434 | 17 | V   | 1  | 246.18121809 |            | 246.18121809        |            |
|                     |              |            |              | 18 | K   | 0  | 147.11280417 |            | 147.11280417        |            |

general information

|                       |             |
|-----------------------|-------------|
| Annotation:           | 14 of 18    |
| AminoAcids Coverage:  | 78%         |
| Intensity Coverage:   | 55%         |
| Peak Coverage:        | 27%         |
| Protein Localisation: | 235 ... 252 |

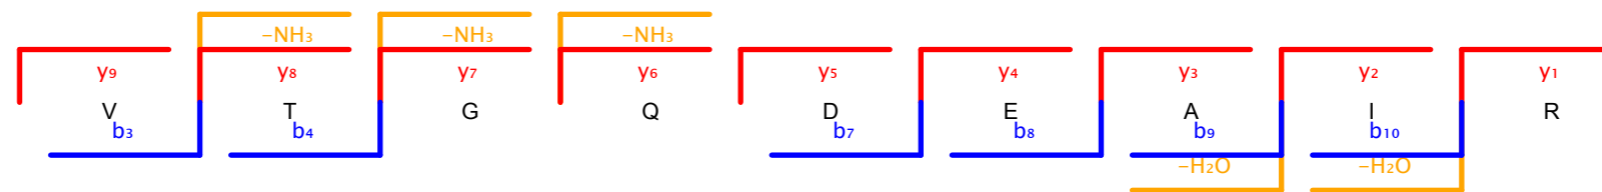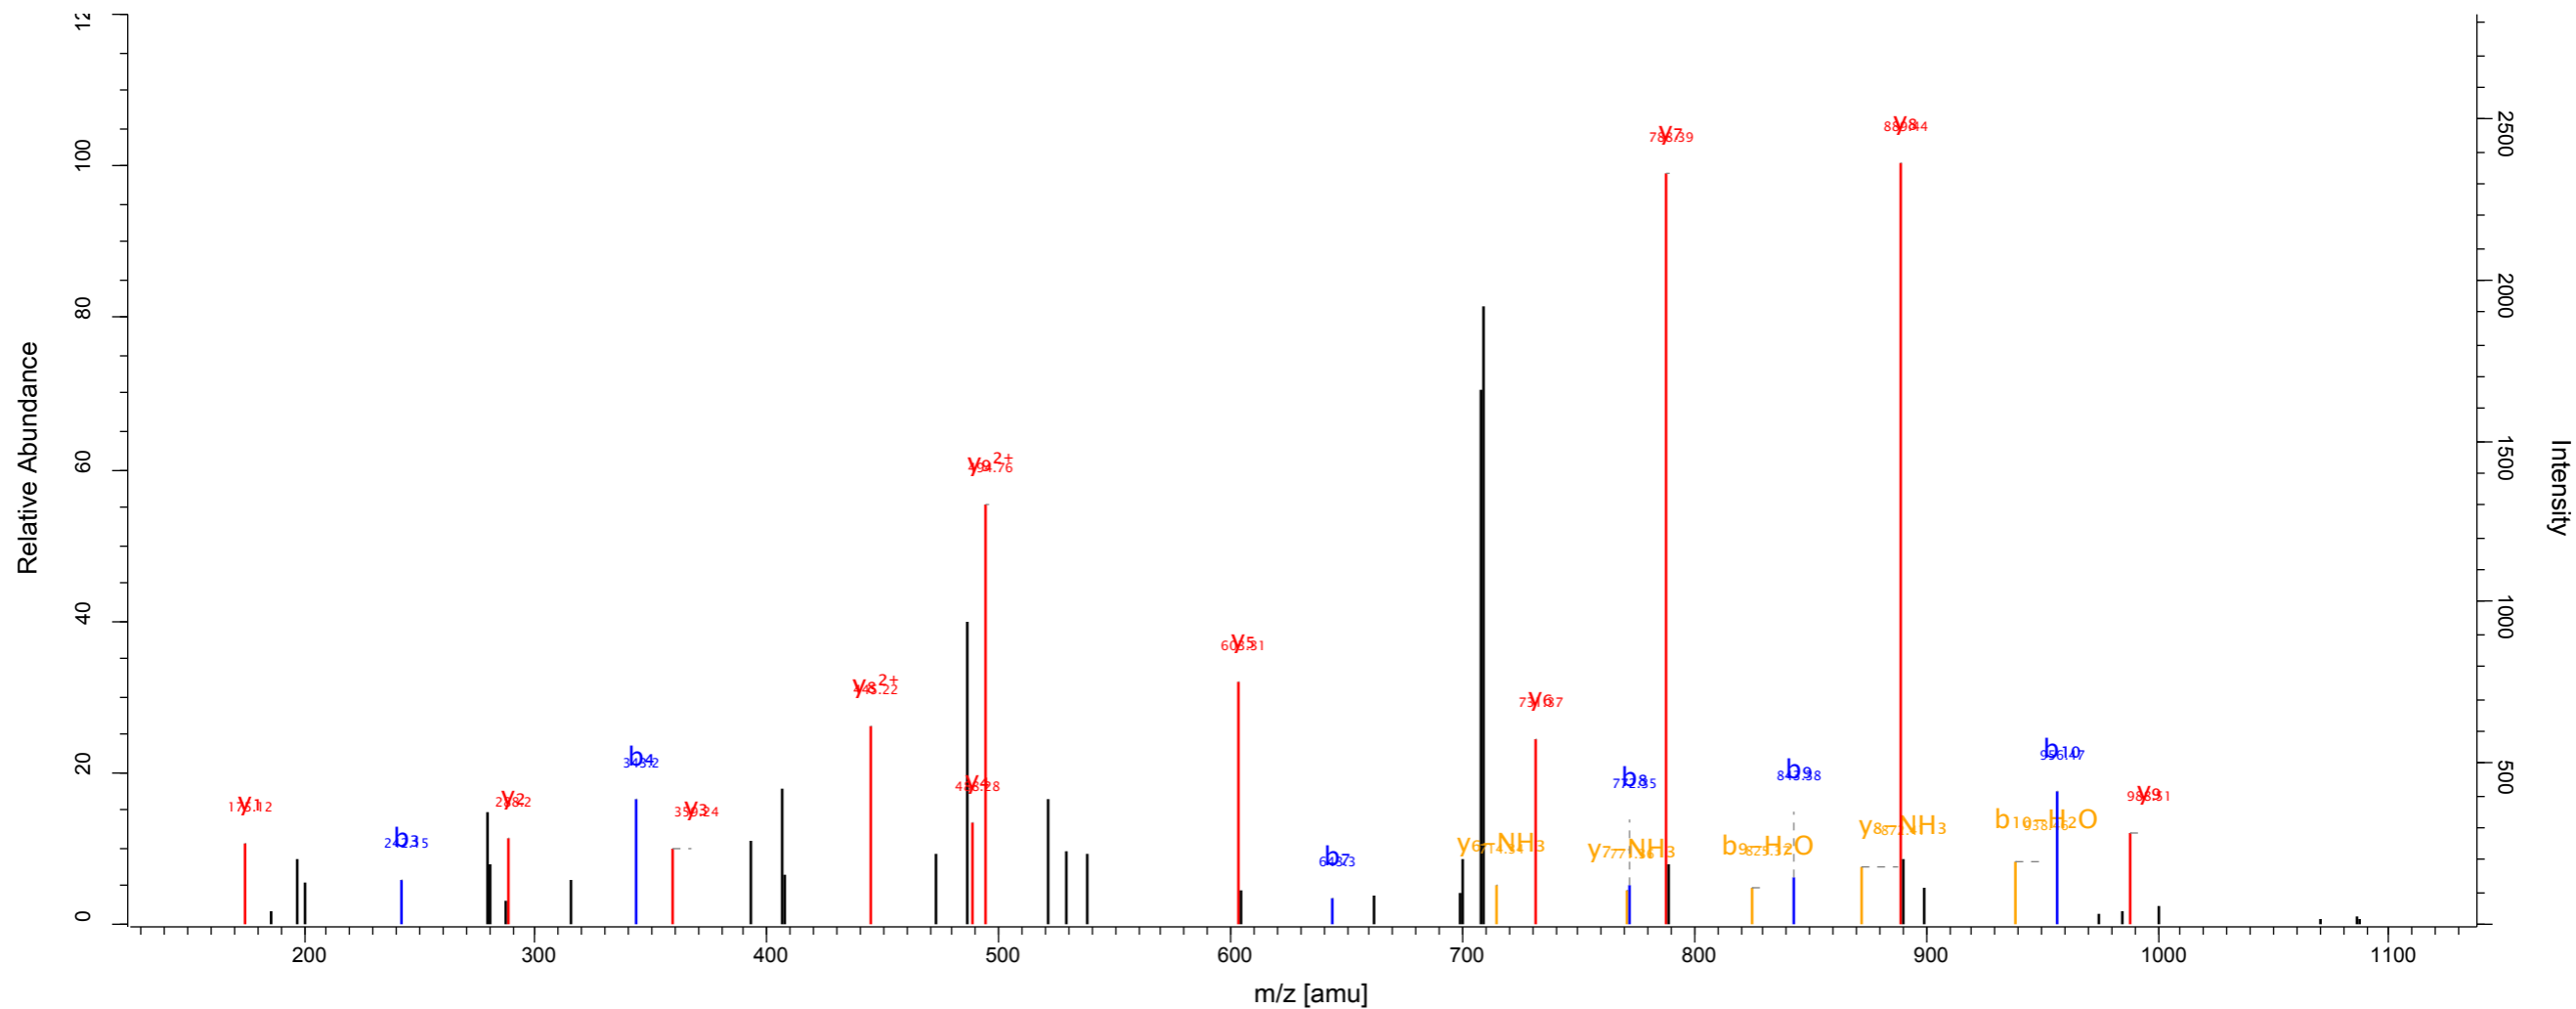

precursor information

|                   |                 |
|-------------------|-----------------|
| Mass:             | 1120.57286      |
| m/z:              | 565.7027        |
| Charge:           | 2+              |
| Retentiontime:    | 25.181655380210 |
| Score:            | 157.3782        |
| Mass Error (ppm): | 0.002576        |
| PEP:              | 7.1053E-05      |
| Precursor Type:   | ISO             |

general information

|                       |             |
|-----------------------|-------------|
| Annotation:           | 9 of 11     |
| AminoAcids Coverage:  | 82 %        |
| Intensity Coverage:   | 56 %        |
| Peak Coverage:        | 12 %        |
| Protein Localisation: | 246 ... 256 |

| b ion      |               |    |     |    | y ion         |            | y <sup>2+</sup> ion |            |
|------------|---------------|----|-----|----|---------------|------------|---------------------|------------|
| Δ dalton   | mass          |    | seq |    | Δ dalton      | mass       | Δ dalton            | mass       |
|            | 72.044390254  | 1  | A   | 10 |               |            |                     |            |
|            | 143.081504042 | 2  | A   | 9  | 1059.54291349 |            | 1059.54291349       |            |
| +0.0554043 | 242.149917958 | 3  | V   | 8  | 988.505799703 | -0.0749525 | 494.756538085       | -0.0363232 |
| +0.0617419 | 343.197596432 | 4  | T   | 7  | 889.437385786 | -0.0717242 | 445.222331127       | +0.0058183 |
|            | 400.219060156 | 5  | G   | 6  | 788.389707312 | -0.0218484 | 788.389707312       |            |
|            | 528.277637668 | 6  | Q   | 5  | 731.368243589 | +0.0061461 | 731.368243589       |            |
| +0.3595428 | 643.3045807   | 7  | D   | 4  | 603.309666077 | -0.0321392 | 603.309666077       |            |
| -0.0303403 | 772.347173796 | 8  | E   | 3  | 488.282723045 | +0.0980753 | 488.282723045       |            |
| +0.0223897 | 843.384287584 | 9  | A   | 2  | 359.240129949 | +0.0204291 | 359.240129949       |            |
| -0.1671431 | 956.468351564 | 10 | I   | 1  | 288.203016161 | +0.0748464 | 288.203016161       |            |
|            |               | 11 | R   | 0  | 175.118952181 | +0.0356346 | 175.118952181       |            |

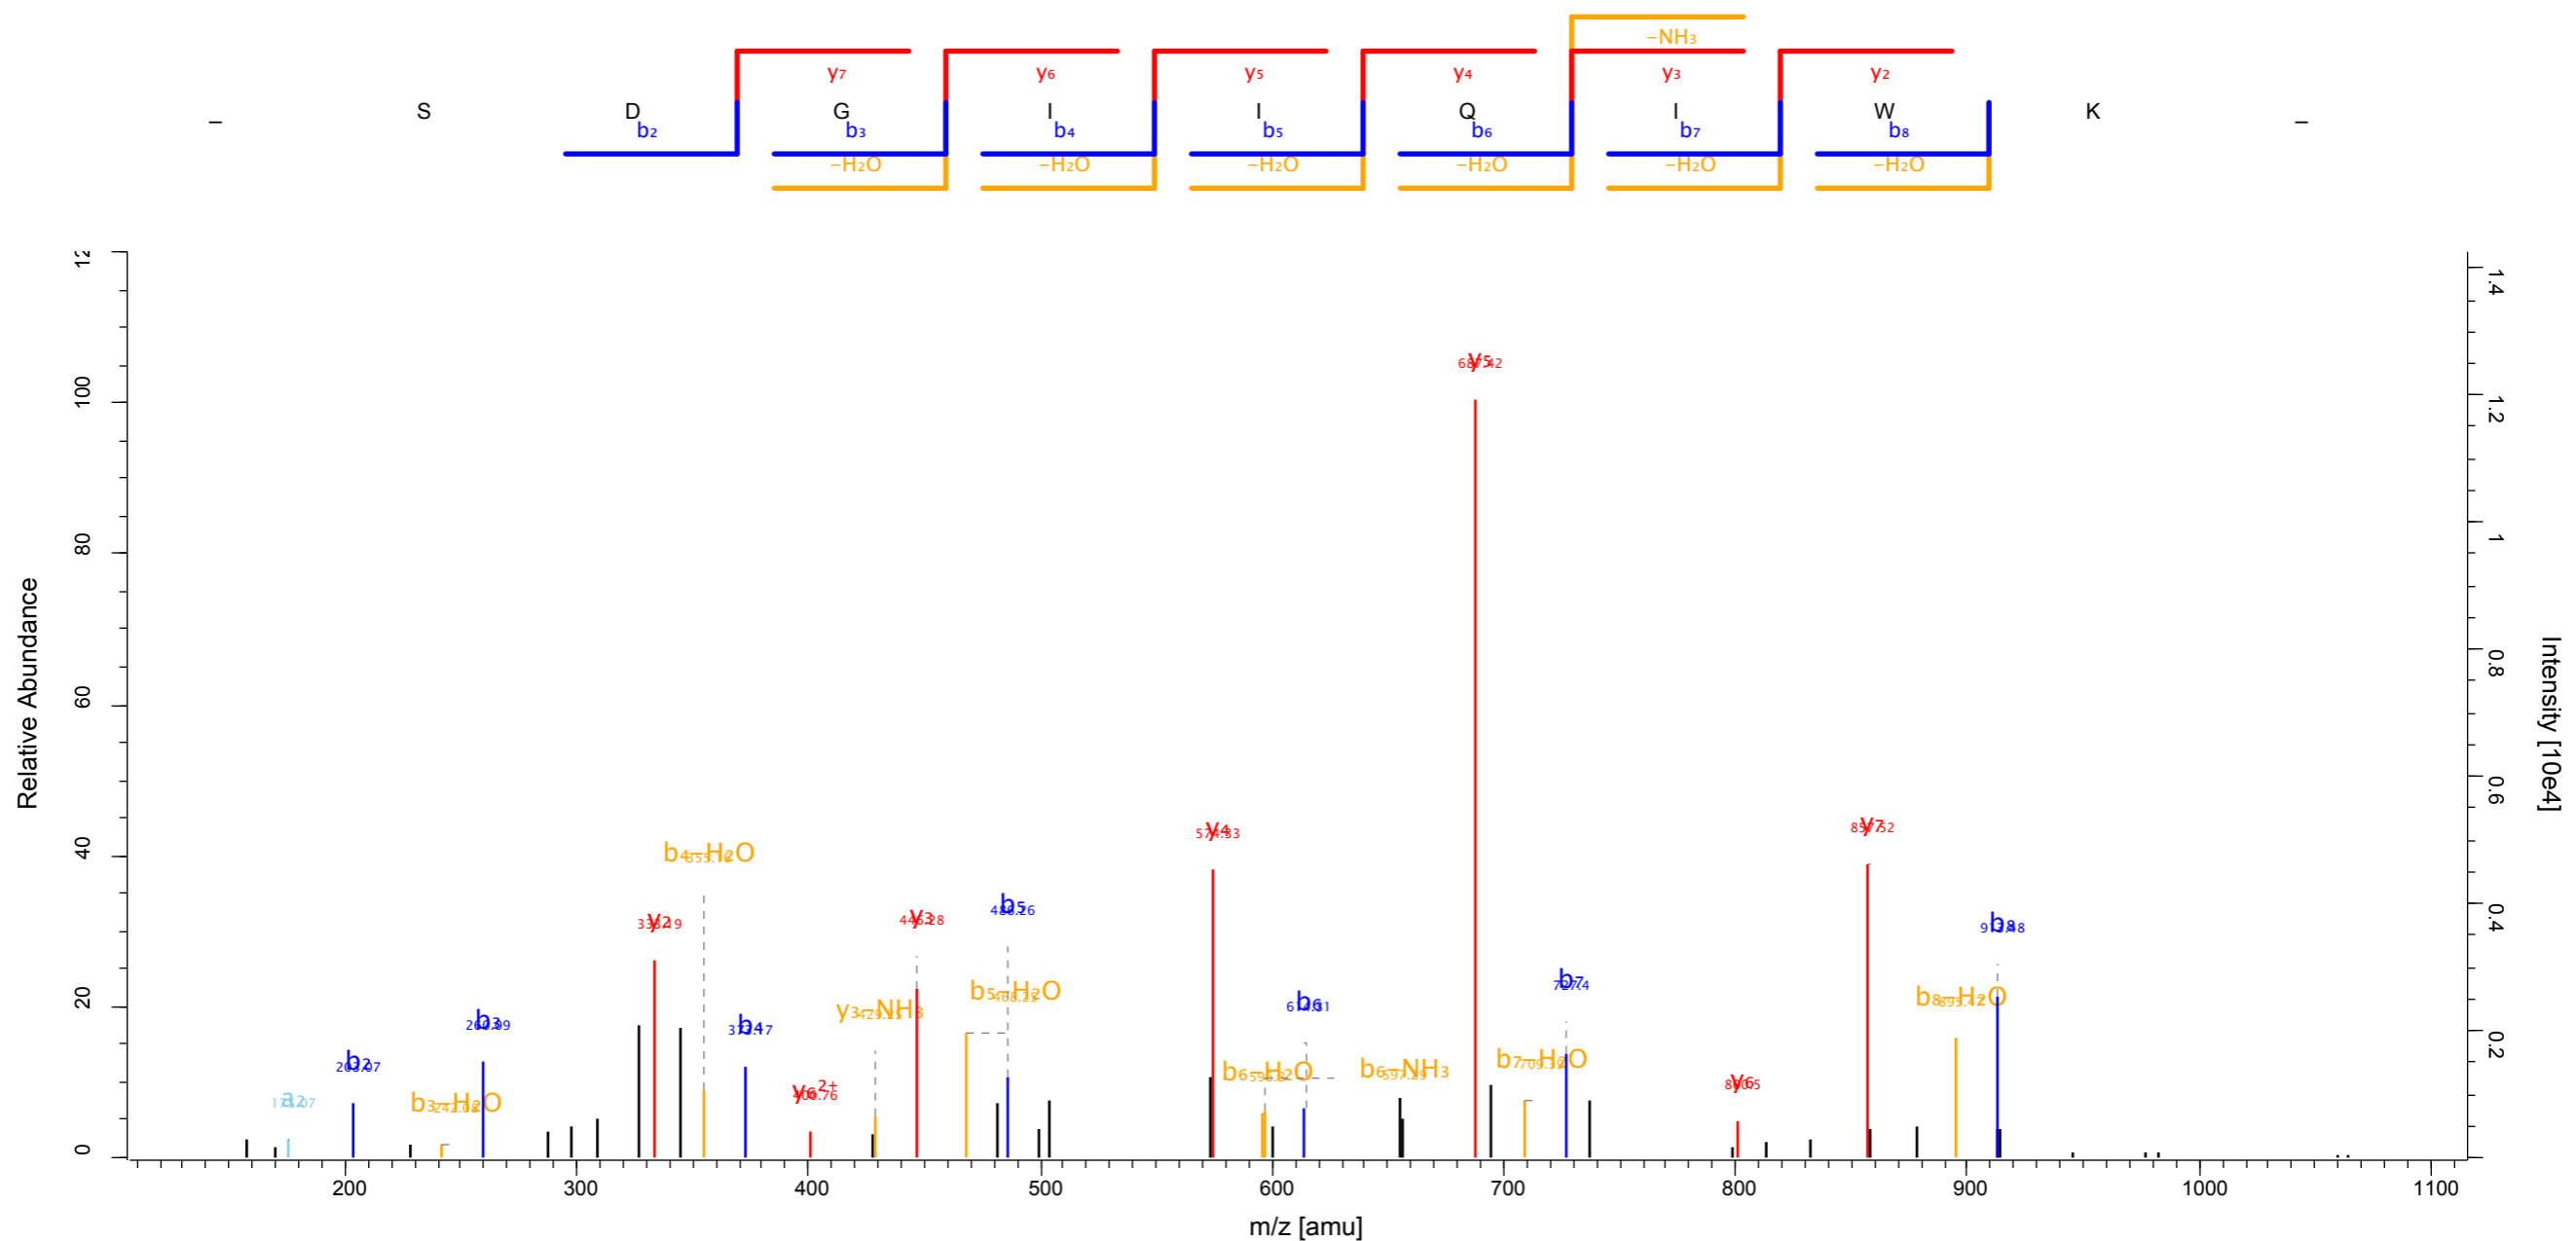

precursor information

|                       |                  |
|-----------------------|------------------|
| Mass:                 | 1058.57600       |
| m/z:                  | 530.20532        |
| Charge:               | 2+               |
| Retention time:       | 82.1226755371004 |
| Score:                | 200.5382         |
| Mass Error (ppm):     | 0.044647         |
| gPED:                 | 3.7824E-06       |
| Annotation:           | 7 of 0           |
| AminoAcids Coverage:  | 78 %             |
| Intensity Coverage:   | 72 %             |
| Peak Coverage:        | 42 %             |
| Protein Localisation: | 160 ... 168      |

| a ion      |              | b ion      |              |   |     |   | y ion        |            | y <sup>2+</sup> ion |            |
|------------|--------------|------------|--------------|---|-----|---|--------------|------------|---------------------|------------|
| Δ dalton   | mass         | Δ dalton   | mass         |   | seq |   | Δ dalton     | mass       | Δ dalton            | mass       |
|            | 60.044390254 |            | 88.039304876 | 1 | S   | 8 |              |            |                     |            |
| +0.0288864 | 175.07133329 | -0.0337772 | 203.06624791 | 2 | D   | 7 | 972.55129333 |            | 972.55129333        |            |
|            | 232.09279701 | -0.0250896 | 260.08771163 | 3 | G   | 6 | 857.5243503  | -0.1155979 | 857.5243503         |            |
|            | 345.17686099 | -0.0438459 | 373.17177561 | 4 | I   | 5 | 800.50288658 | -0.0075863 | 400.75508152        | -0.0217441 |
|            | 458.26092497 | -0.2706711 | 486.25583959 | 5 | I   | 4 | 687.4188226  | -0.1066278 | 687.4188226         |            |
|            | 586.31950248 | -0.154566  | 614.3144171  | 6 | Q   | 3 | 574.33475862 | +0.0923044 | 574.33475862        |            |
|            | 699.40356646 | -0.1055734 | 727.39848108 | 7 | I   | 2 | 446.2761811  | +0.0075103 | 446.2761811         |            |
|            | 885.48287942 | -0.1469835 | 913.47779404 | 8 | W   | 1 | 333.19211712 | +0.0581881 | 333.19211712        |            |
|            |              |            |              | 9 | K   | 0 | 147.11280417 |            | 147.11280417        |            |

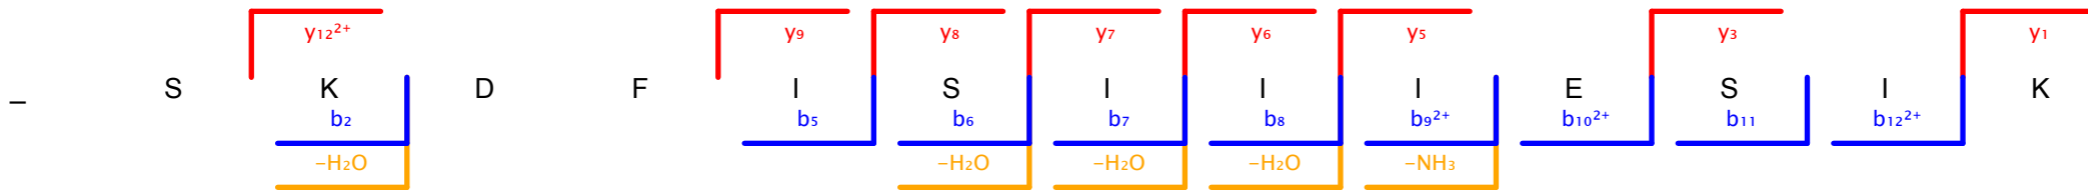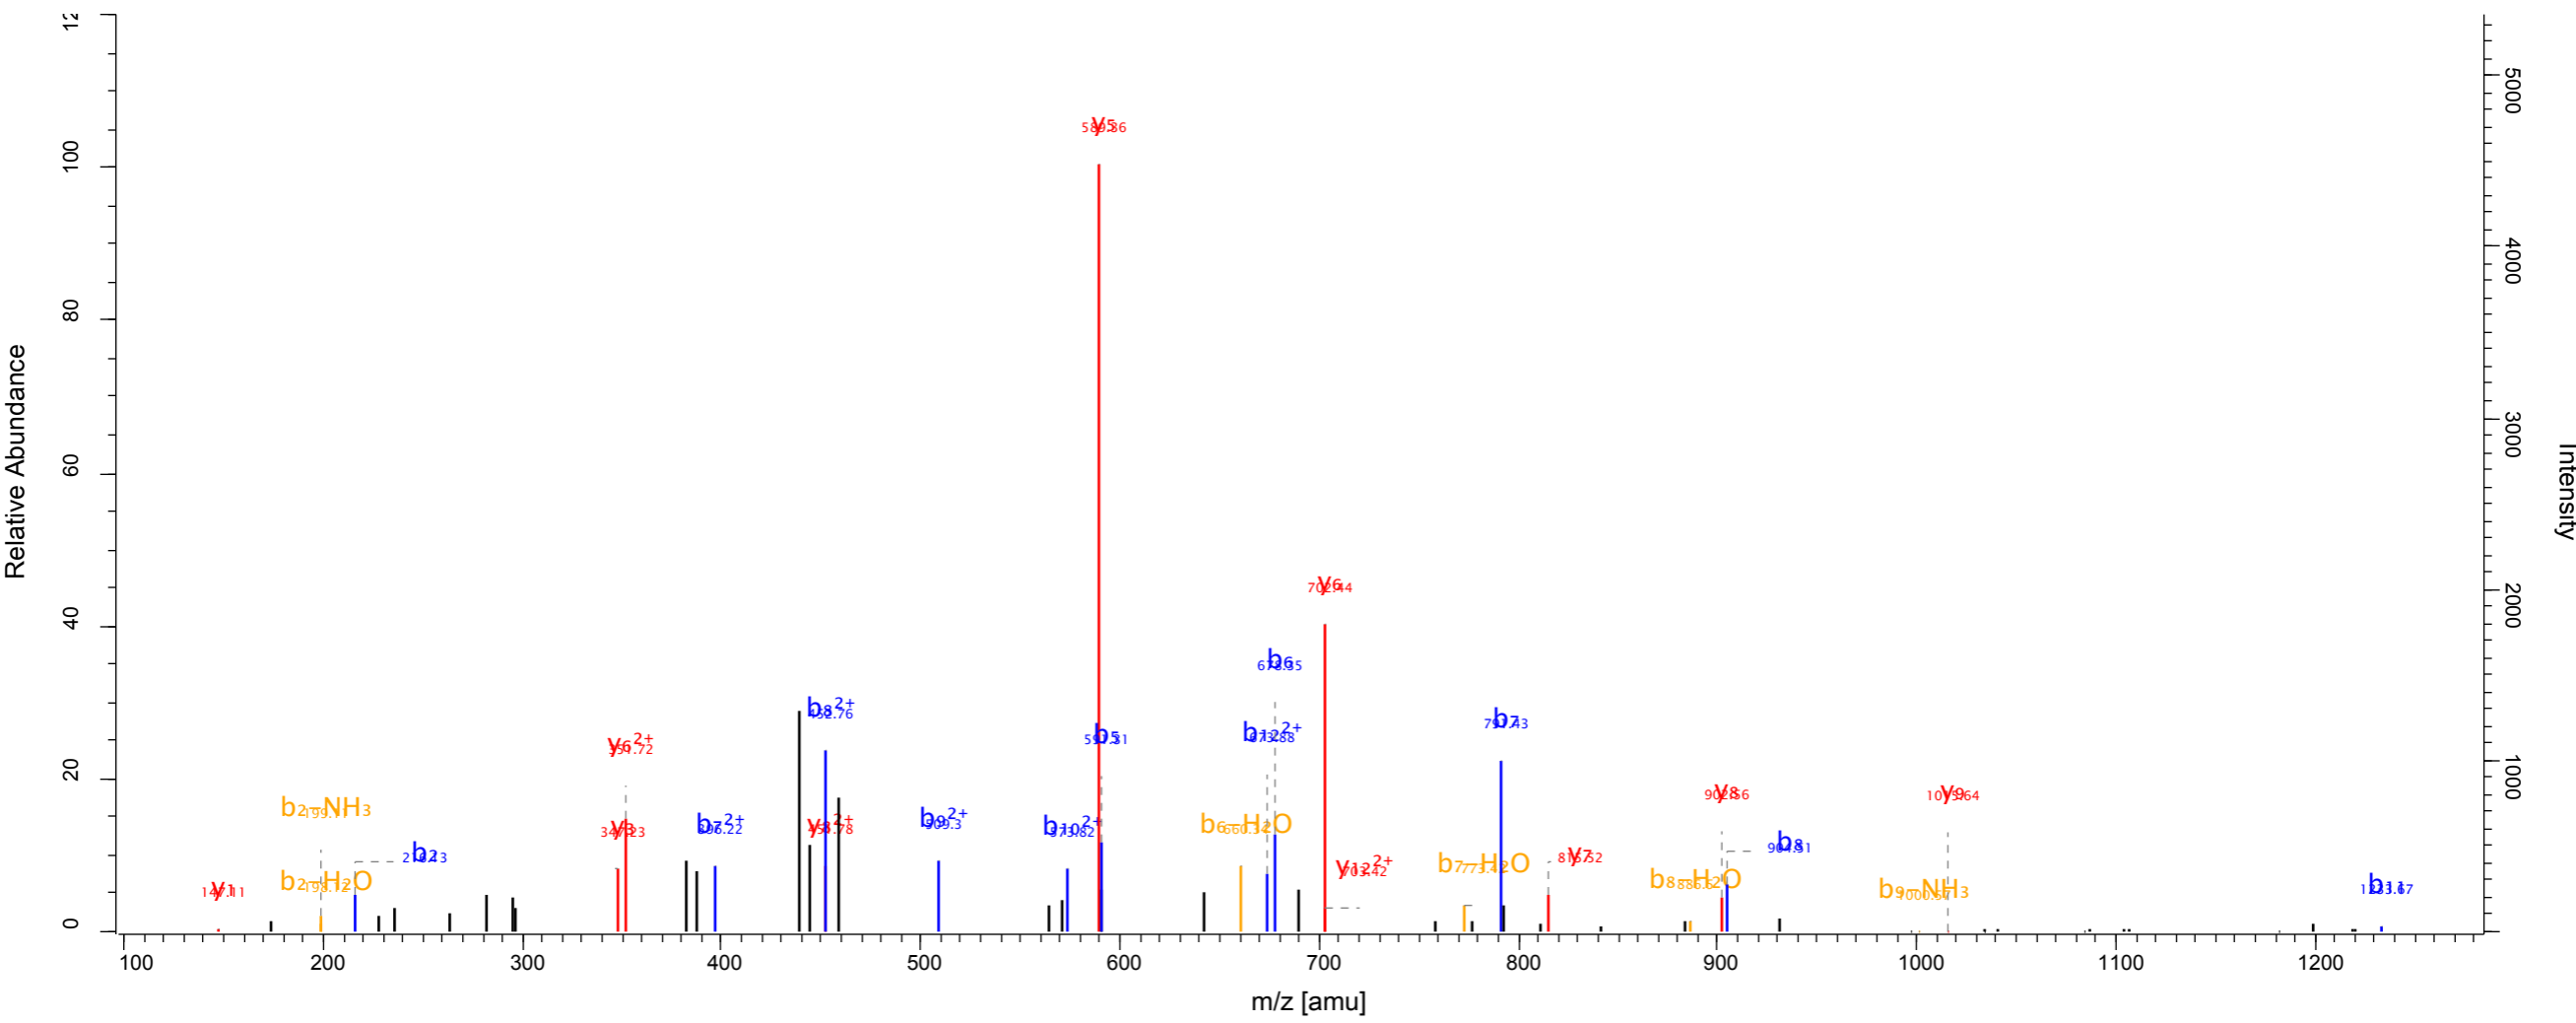

precursor information

|                   |                  |
|-------------------|------------------|
| Mass:             | 1401.85448       |
| m/z:              | 108.2021         |
| Charge:           | 2+               |
| Retention time:   | 118.756637573242 |
| Score:            | 164.8112         |
| Mass Error (ppm): | -0.24453         |
| PEP:              | 5.3349E-06       |
| Precursor Type:   | MULTI            |

general information

|                       |             |
|-----------------------|-------------|
| Annotation:           | 10 of 12    |
| AminoAcids Coverage:  | 77 %        |
| Intensity Coverage:   | 71 %        |
| Peak Coverage:        | 43 %        |
| Protein Localisation: | 237 ... 249 |

| b <sup>2+</sup> ion |              | b ion      |              |    |     |    | y ion        |            | y <sup>2+</sup> ion |            |
|---------------------|--------------|------------|--------------|----|-----|----|--------------|------------|---------------------|------------|
| Δ dalton            | mass         | Δ dalton   | mass         |    | seq |    | Δ dalton     | mass       | Δ dalton            | mass       |
|                     | 88.039304876 |            | 88.039304876 | 1  | S   | 12 |              |            |                     |            |
|                     | 216.13426789 | +0.0194797 | 216.13426789 | 2  | K   | 11 | 1405.830094  |            | 703.41868521        | +0.0048377 |
|                     | 331.16121093 |            | 331.16121093 | 3  | D   | 10 | 1277.7351309 |            | 1277.7351309        |            |
|                     | 478.22962484 |            | 478.22962484 | 4  | F   | 9  | 1162.7081879 |            | 1162.7081879        |            |
|                     | 591.31368882 | +0.021089  | 591.31368882 | 5  | I   | 8  | 1015.639774  | +0.1123622 | 1015.639774         |            |
|                     | 678.34571723 | -0.1214741 | 678.34571723 | 6  | S   | 7  | 902.55571001 | -0.1004488 | 451.78149324        | +0.0834665 |
| -0.0555955          | 396.21852884 | -0.1357138 | 791.42978121 | 7  | I   | 6  | 815.5236816  | -0.0845336 | 815.5236816         |            |
| +0.0180647          | 452.76056083 | -0.0552881 | 904.51384519 | 8  | I   | 5  | 702.43961762 | -0.0228085 | 351.72344704        | +0.0593899 |
| +0.1106762          | 509.30259282 |            | 1017.5979092 | 9  | I   | 4  | 589.3555364  | -0.0815058 | 589.3555364         |            |
| -0.017615           | 573.82388937 |            | 1146.6405023 | 10 | E   | 3  | 476.27148966 |            | 476.27148966        |            |
|                     | 1233.6725307 | -0.1971889 | 1233.6725307 | 11 | S   | 2  | 347.22889656 | +0.0500341 | 347.22889656        |            |
| -0.0821309          | 673.88193556 |            | 1346.7565947 | 12 | I   | 1  | 260.19686815 |            | 260.19686815        |            |
|                     |              |            |              | 13 | K   | 0  | 147.11280417 | +0.0621073 | 147.11280417        |            |

Scan number 20280 Raw file 20091015\_Orbi6\_MaHe\_SA\_ADH\_exp3\_Susp\_Gel08\_091018071949  
 Method ITMS; CID Genenames FAM54A

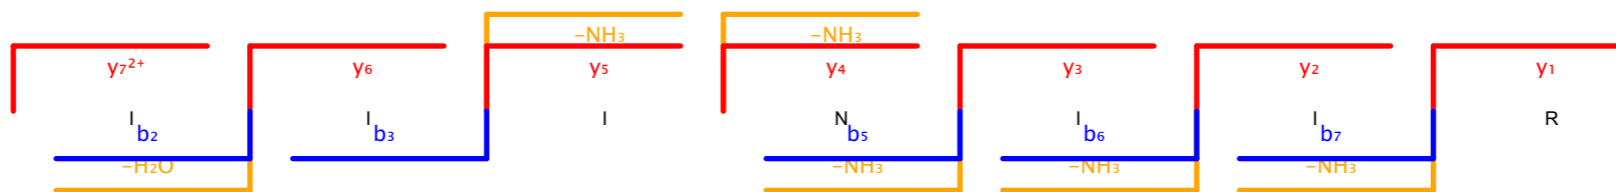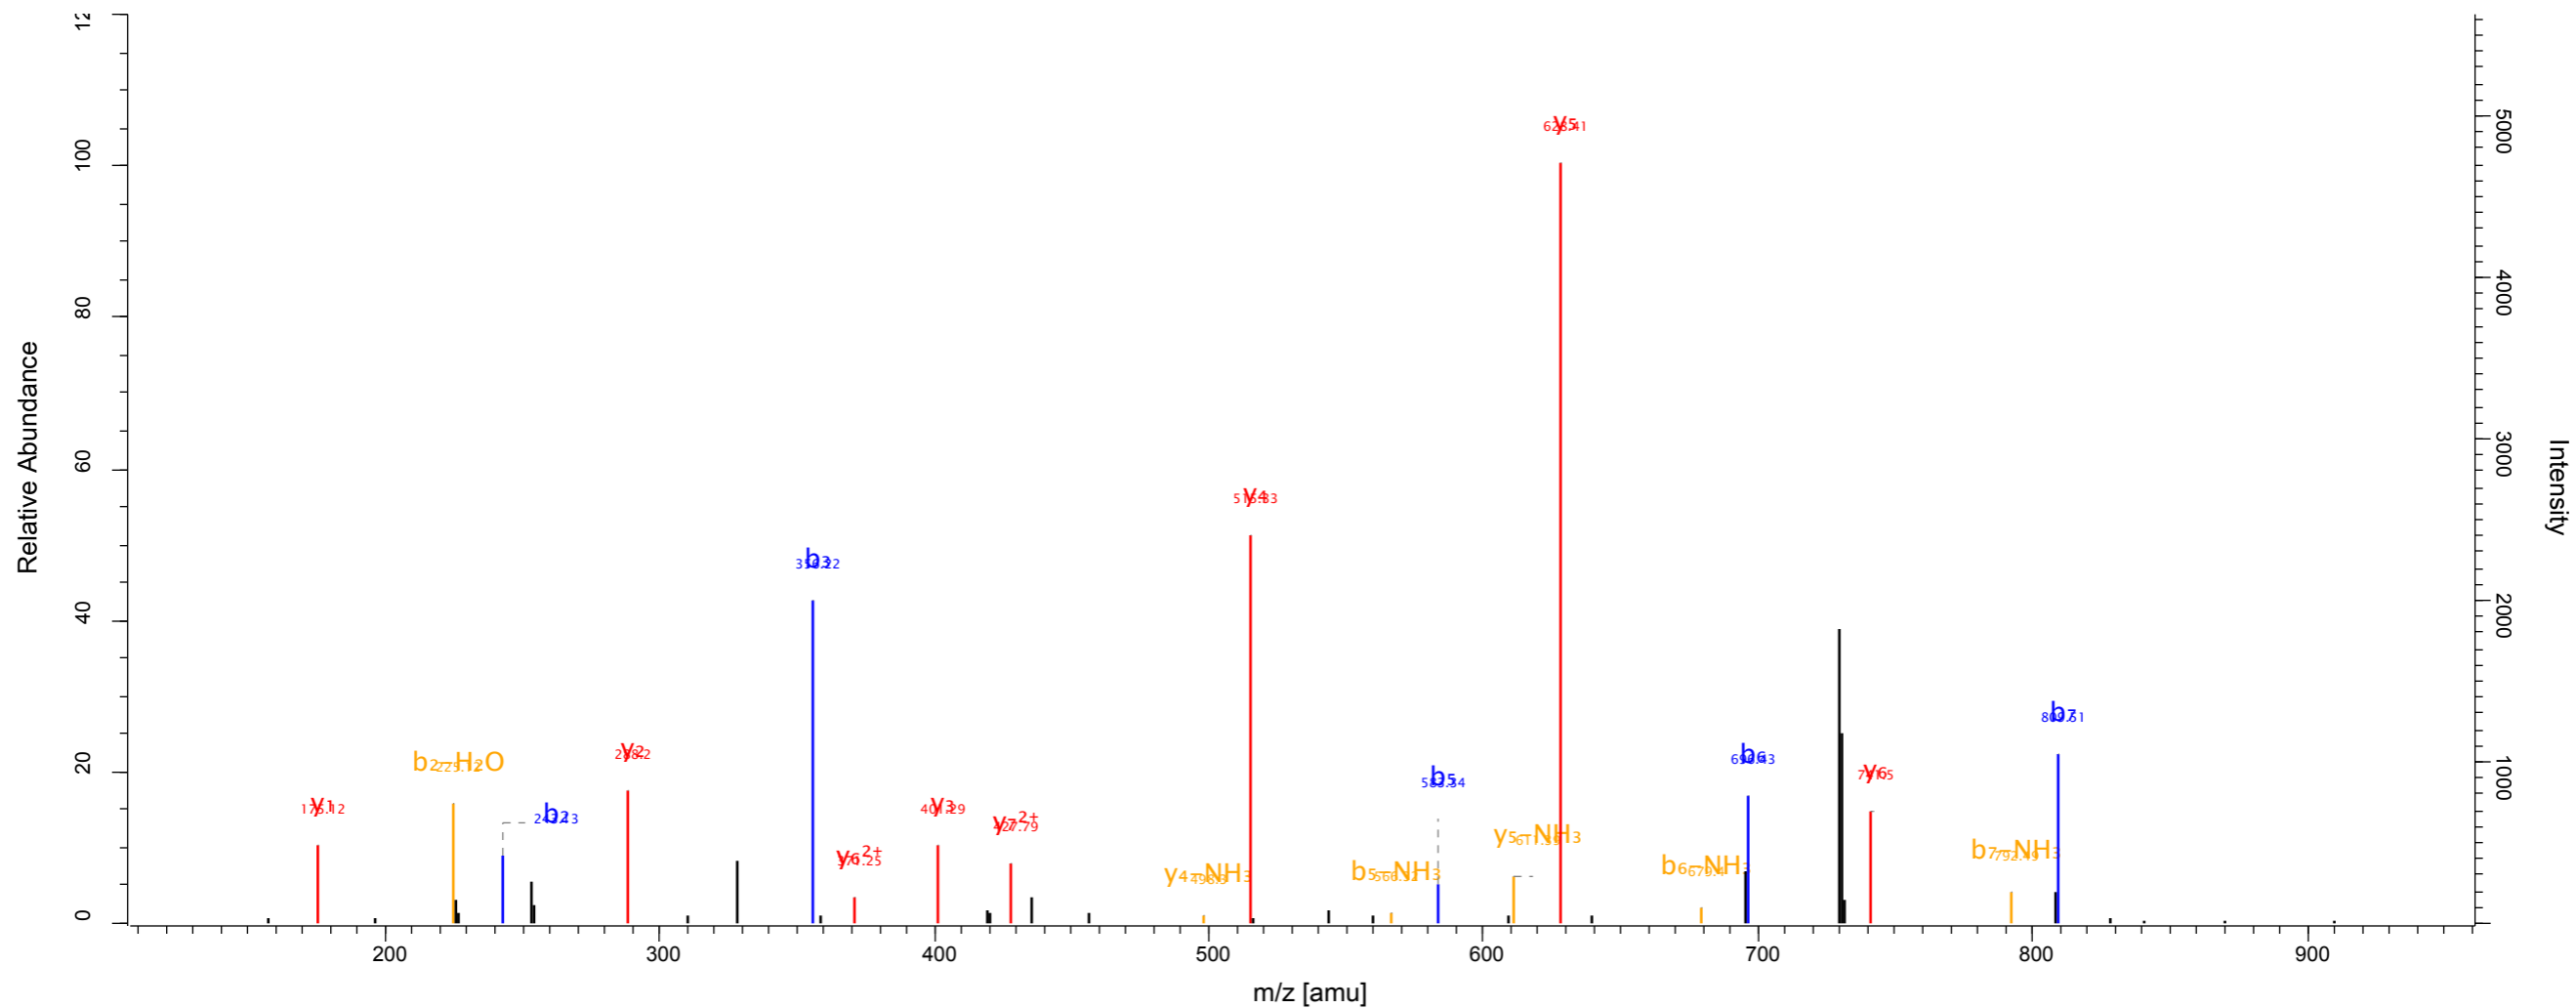

precursor information

|                       |                  |
|-----------------------|------------------|
| Mass:                 | 082.61721        |
| m/z:                  | 402.21502        |
| Charge:               | 2+               |
| Retention time:       | 110.180068060727 |
| Score:                | 182.2865         |
| Mass Error [ppm]:     | -0.20046         |
| Gene ID:              | 6.1028E-05       |
| Annotation:           | 7 of 8           |
| AminoAcids Coverage:  | 88 %             |
| Intensity Coverage:   | 75 %             |
| Peak Coverage:        | 41 %             |
| Protein Localisation: | 2 ... 9          |

| b ion      |               |   |     |   | y ion         |            | y <sup>2+</sup> ion |            |
|------------|---------------|---|-----|---|---------------|------------|---------------------|------------|
| Δ dalton   | mass          |   | seq |   | Δ dalton      | mass       | Δ dalton            | mass       |
|            | 130.049869563 | 1 | S   | 7 |               |            |                     |            |
| -0.0814738 | 243.133933543 | 2 | I   | 6 | 854.58219953  |            | 427.794737998       | -0.0813591 |
| -0.2437849 | 356.217997524 | 3 | I   | 5 | 741.49813555  | -0.1216707 | 371.252706008       | -0.0262656 |
|            | 469.302061504 | 4 | I   | 4 | 628.414071569 | -0.0318084 | 628.414071569       |            |
| -0.2899963 | 583.344988951 | 5 | N   | 3 | 515.330007589 | -0.0716458 | 515.330007589       |            |
| -0.0171877 | 696.429052932 | 6 | I   | 2 | 401.287080142 | -0.0130323 | 401.287080142       |            |
| -0.1185857 | 809.513116912 | 7 | I   | 1 | 288.203016161 | -0.0814036 | 288.203016161       |            |
|            |               | 8 | R   | 0 | 175.118952181 | +0.0487419 | 175.118952181       |            |

Scan number 10756 Raw file 20091015\_Orbi6\_MaHe\_SA\_ADH\_exp3\_Susp\_Gel10  
 Method ITMS; CID Genenames ZNF503;ZNF703

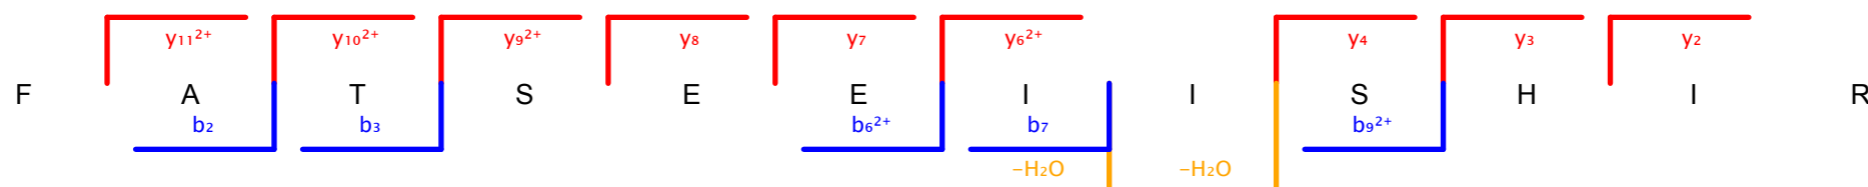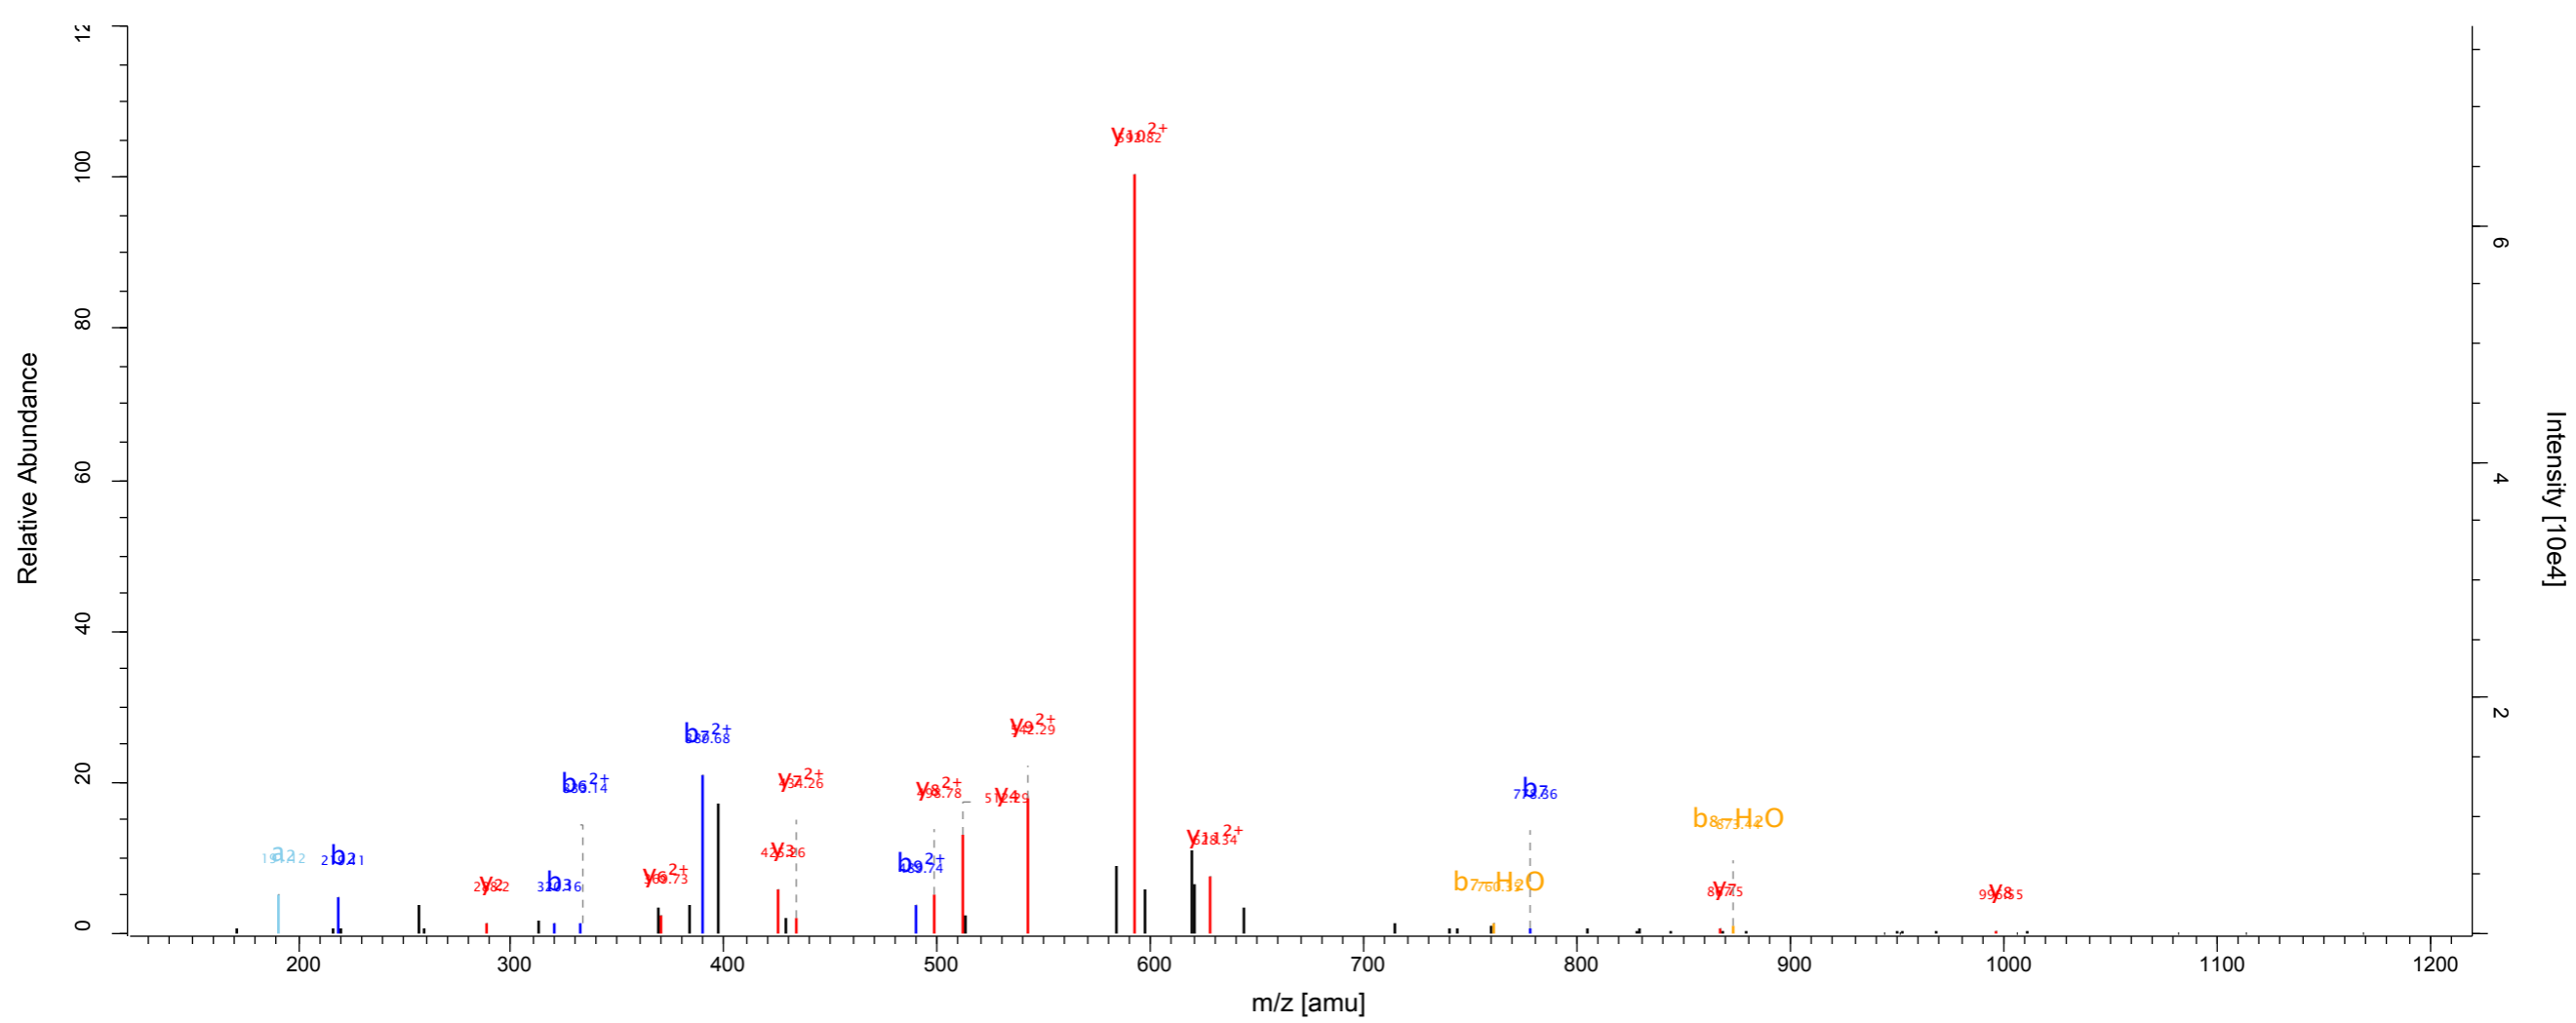

precursor information

|                   |                  |
|-------------------|------------------|
| Mass:             | 1401.72604       |
| m/z:              | 1468.24020       |
| Charge:           | 2+               |
| Retention time:   | 64.6223506801758 |
| Score:            | 137.9532         |
| Mass Error (ppm): | 0.5757           |
| PEP:              | 0.00021475       |
| Precursor Type:   | ISO              |

general information

|                       |             |
|-----------------------|-------------|
| Annotation:           | 10 of 12    |
| AminoAcids Coverage:  | 82 %        |
| Intensity Coverage:   | 71 %        |
| Peak Coverage:        | 36 %        |
| Protein Localisation: | 529 ... 540 |

| a ion     |            | b <sup>2+</sup> ion |            | b ion      |            |    |     |    | y ion      |            | y <sup>2+</sup> ion |            |
|-----------|------------|---------------------|------------|------------|------------|----|-----|----|------------|------------|---------------------|------------|
| Δ dalton  | mass       | Δ dalton            | mass       | Δ dalton   | mass       |    | seq |    | Δ dalton   | mass       | Δ dalton            | mass       |
|           | 120.080776 |                     | 148.07569  |            | 148.07569  | 1  | F   | 11 |            |            |                     |            |
| +0.018402 | 191.11789  |                     | 219.112804 | -0.1151082 | 219.112804 | 2  | A   | 10 | 1255.66409 |            | 628.335684          | +0.006052  |
|           | 292.165568 |                     | 320.160483 | -0.0319731 | 320.160483 | 3  | T   | 9  | 1184.62698 |            | 592.817127          | +0.1513179 |
|           | 379.197596 |                     | 407.192511 |            | 407.192511 | 4  | S   | 8  | 1083.5793  |            | 542.293288          | +0.1138778 |
|           | 508.24019  |                     | 536.235104 |            | 536.235104 | 5  | E   | 7  | 996.547271 | -0.1505421 | 498.777274          | -0.1055511 |
|           | 637.282783 | -0.1421512          | 333.142487 |            | 665.277697 | 6  | E   | 6  | 867.504677 | +0.0314553 | 434.255977          | -0.1496843 |
|           | 750.366847 | -0.0921116          | 389.684519 | +0.091791  | 778.361761 | 7  | I   | 5  | 738.462084 |            | 369.73468           | +0.2460325 |
|           | 863.450911 |                     | 891.445825 |            | 891.445825 | 8  | I   | 4  | 625.37802  |            | 625.37802           |            |
|           | 950.482939 | +0.1025582          | 489.742565 |            | 978.477854 | 9  | S   | 3  | 512.293956 | -0.0517079 | 512.293956          |            |
|           | 1087.54185 |                     | 1115.53677 |            | 1115.53677 | 10 | H   | 2  | 425.261928 | +0.0590864 | 425.261928          |            |
|           | 1200.62591 |                     | 1228.62083 |            | 1228.62083 | 11 | I   | 1  | 288.203016 | -0.0445079 | 288.203016          |            |
|           |            |                     |            |            |            | 12 | R   | 0  | 175.118952 |            | 175.118952          |            |

Scan number 19805 Raw file 20091015\_Orbi6\_MaHe\_SA\_ADH\_exp3\_Susp\_Gel11  
 Method ITMS; CID Genenames GPR56

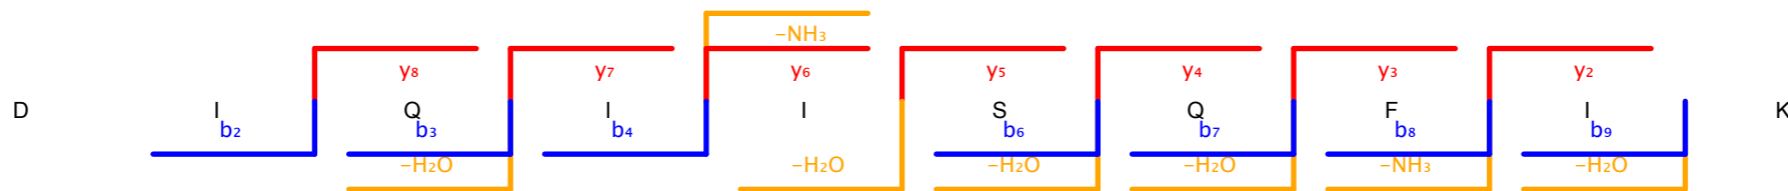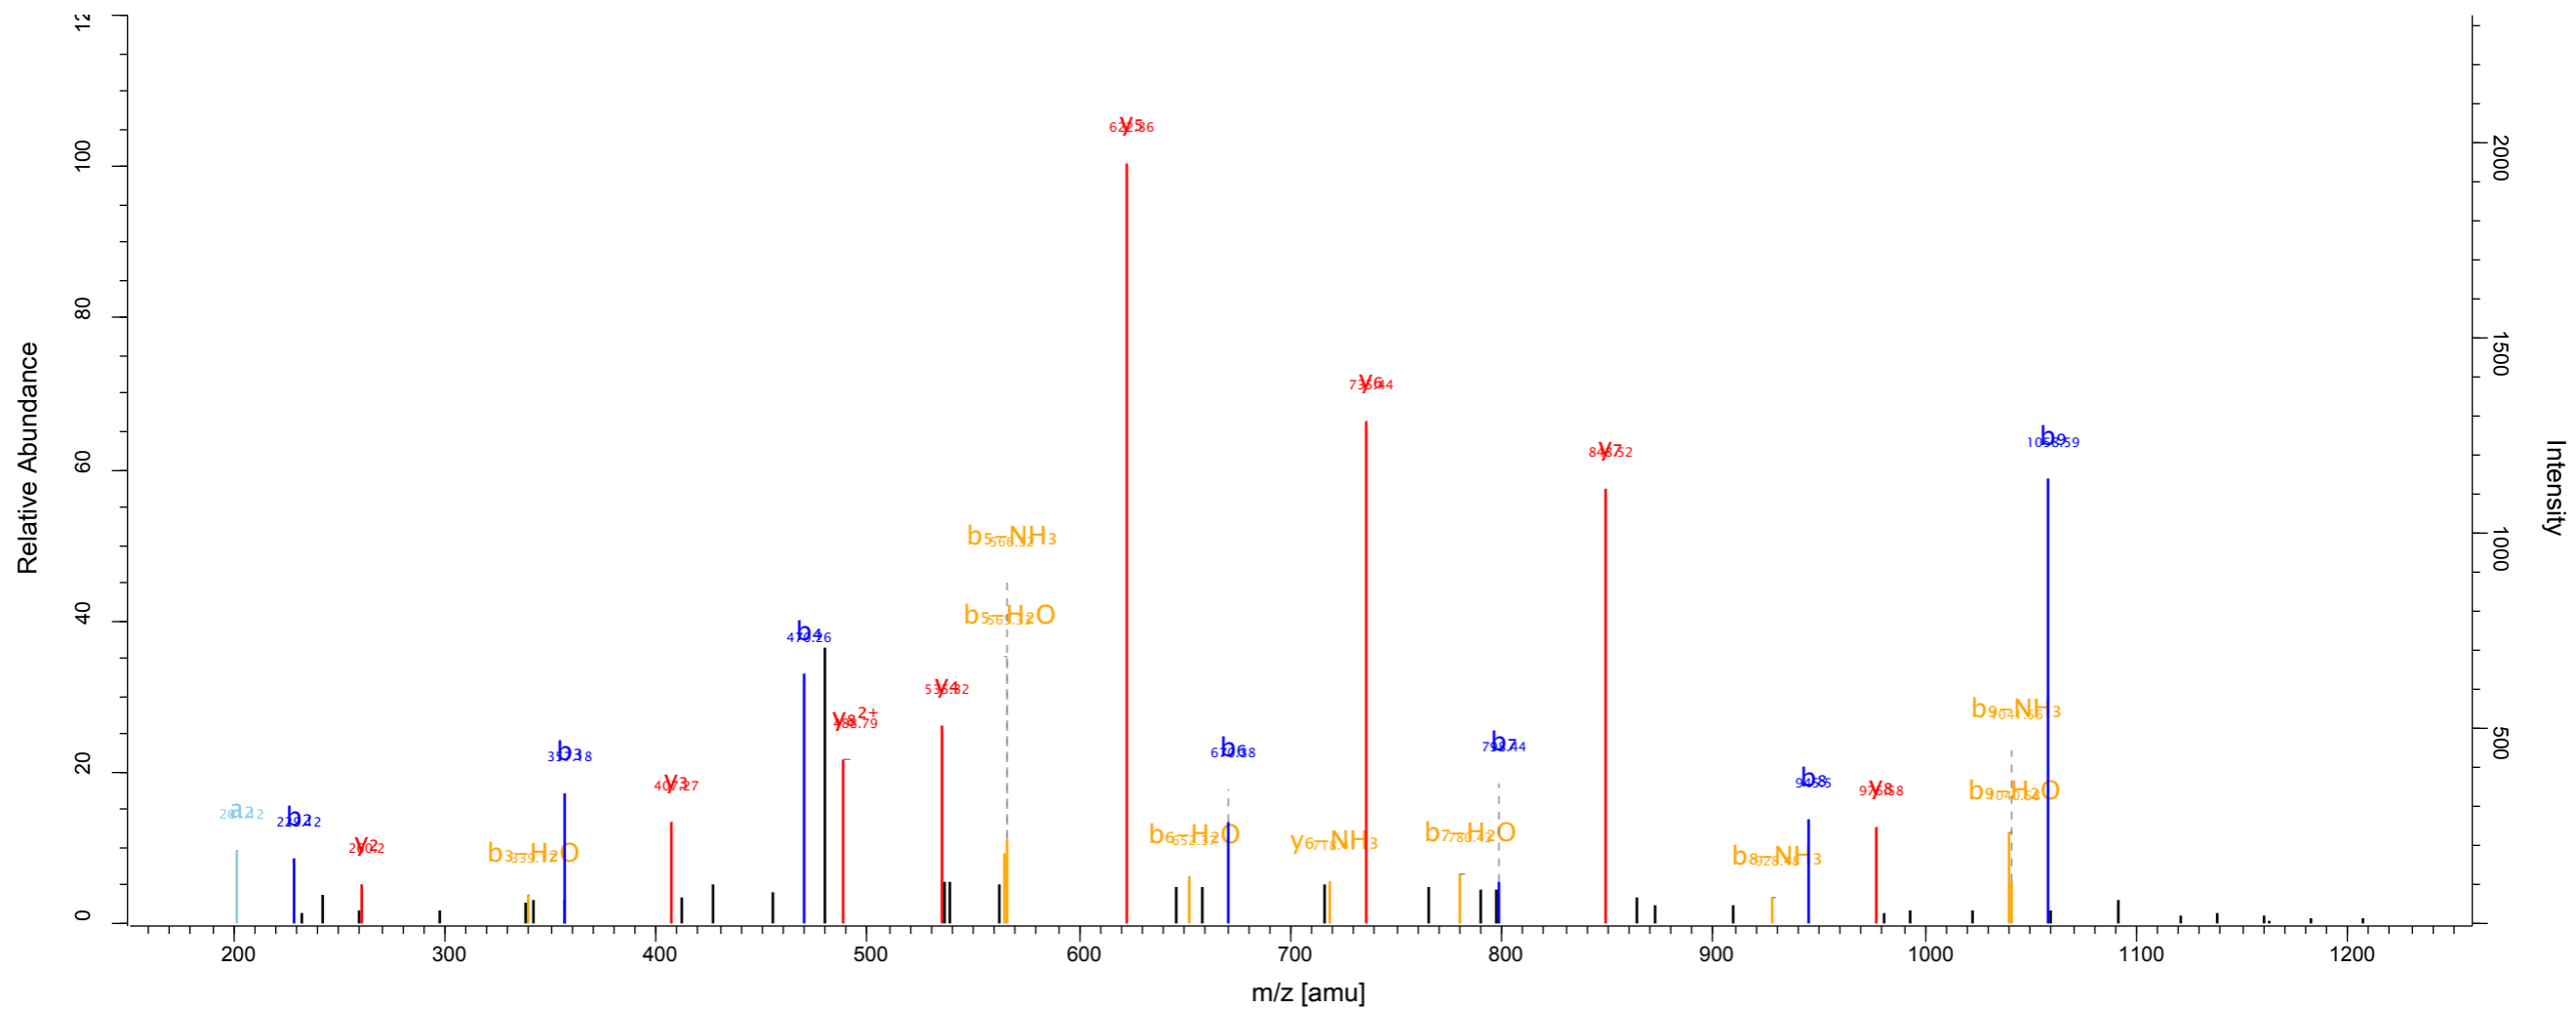

precursor information

|                   |                  |
|-------------------|------------------|
| Mass:             | 1202.68718       |
| m/z:              | 602.85087        |
| Charge:           | 2+               |
| Retention time:   | 112.248138427734 |
| Score:            | 200.0051         |
| Mass Error (ppm): | 0.71230          |
| DED:              | 2.1583E-16       |
| Precursor Type:   | MULTI            |

96 precursor information

|                       |             |
|-----------------------|-------------|
| Annotation:           | 8 of 10     |
| AminoAcids Coverage:  | 80%         |
| Intensity Coverage:   | 80%         |
| Peak Coverage:        | 42%         |
| Protein Localisation: | 182 ... 191 |

| a ion      |              | b ion      |              |    |     |   | y ion        |            | y <sup>2+</sup> ion |            |
|------------|--------------|------------|--------------|----|-----|---|--------------|------------|---------------------|------------|
| Δ dalton   | mass         | Δ dalton   | mass         |    | seq |   | Δ dalton     | mass       | Δ dalton            | mass       |
|            | 88.039304876 |            | 116.0342195  | 1  | D   | 9 |              |            |                     |            |
| -0.0010849 | 201.12336886 | -0.0028813 | 229.11828348 | 2  | I   | 8 | 1089.6666574 |            | 1089.6666574        |            |
|            | 329.18194637 | -0.0318415 | 357.17686099 | 3  | Q   | 7 | 976.58259346 | -0.047132  | 488.79493496        | -0.0005624 |
|            | 442.26601035 | -0.0183713 | 470.26092497 | 4  | I   | 6 | 848.52401595 | -0.0867601 | 848.52401595        |            |
|            | 555.35007433 |            | 583.34498895 | 5  | I   | 5 | 735.43995197 | -0.0162459 | 735.43995197        |            |
|            | 642.38210274 | -0.0498079 | 670.37701736 | 6  | S   | 4 | 622.35588799 | -0.0794598 | 622.35588799        |            |
|            | 770.44068025 | +0.0396859 | 798.43559487 | 7  | Q   | 3 | 535.32385958 | -0.1795114 | 535.32385958        |            |
|            | 917.50909417 | -0.0962329 | 945.50400879 | 8  | F   | 2 | 407.26528207 | +0.0669933 | 407.26528207        |            |
|            | 1030.5931581 | -0.2056265 | 1058.5880728 | 9  | I   | 1 | 260.19686815 | +0.0849312 | 260.19686815        |            |
|            |              |            |              | 10 | K   | 0 | 147.11280417 |            | 147.11280417        |            |

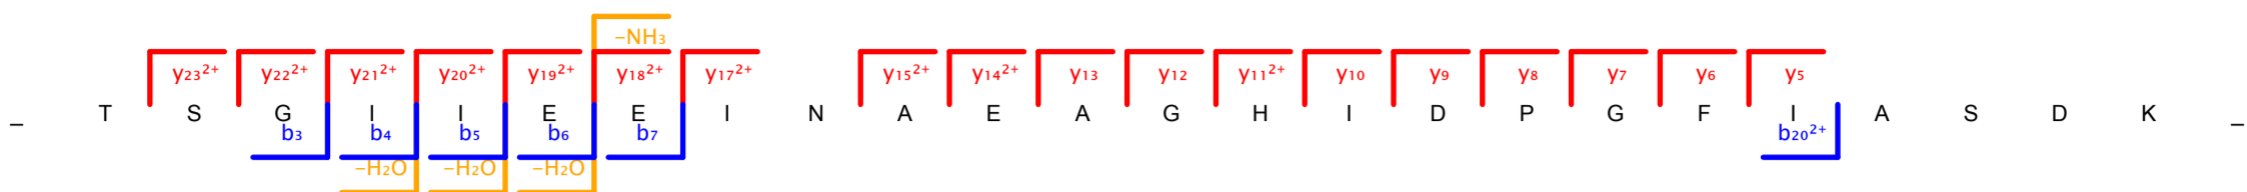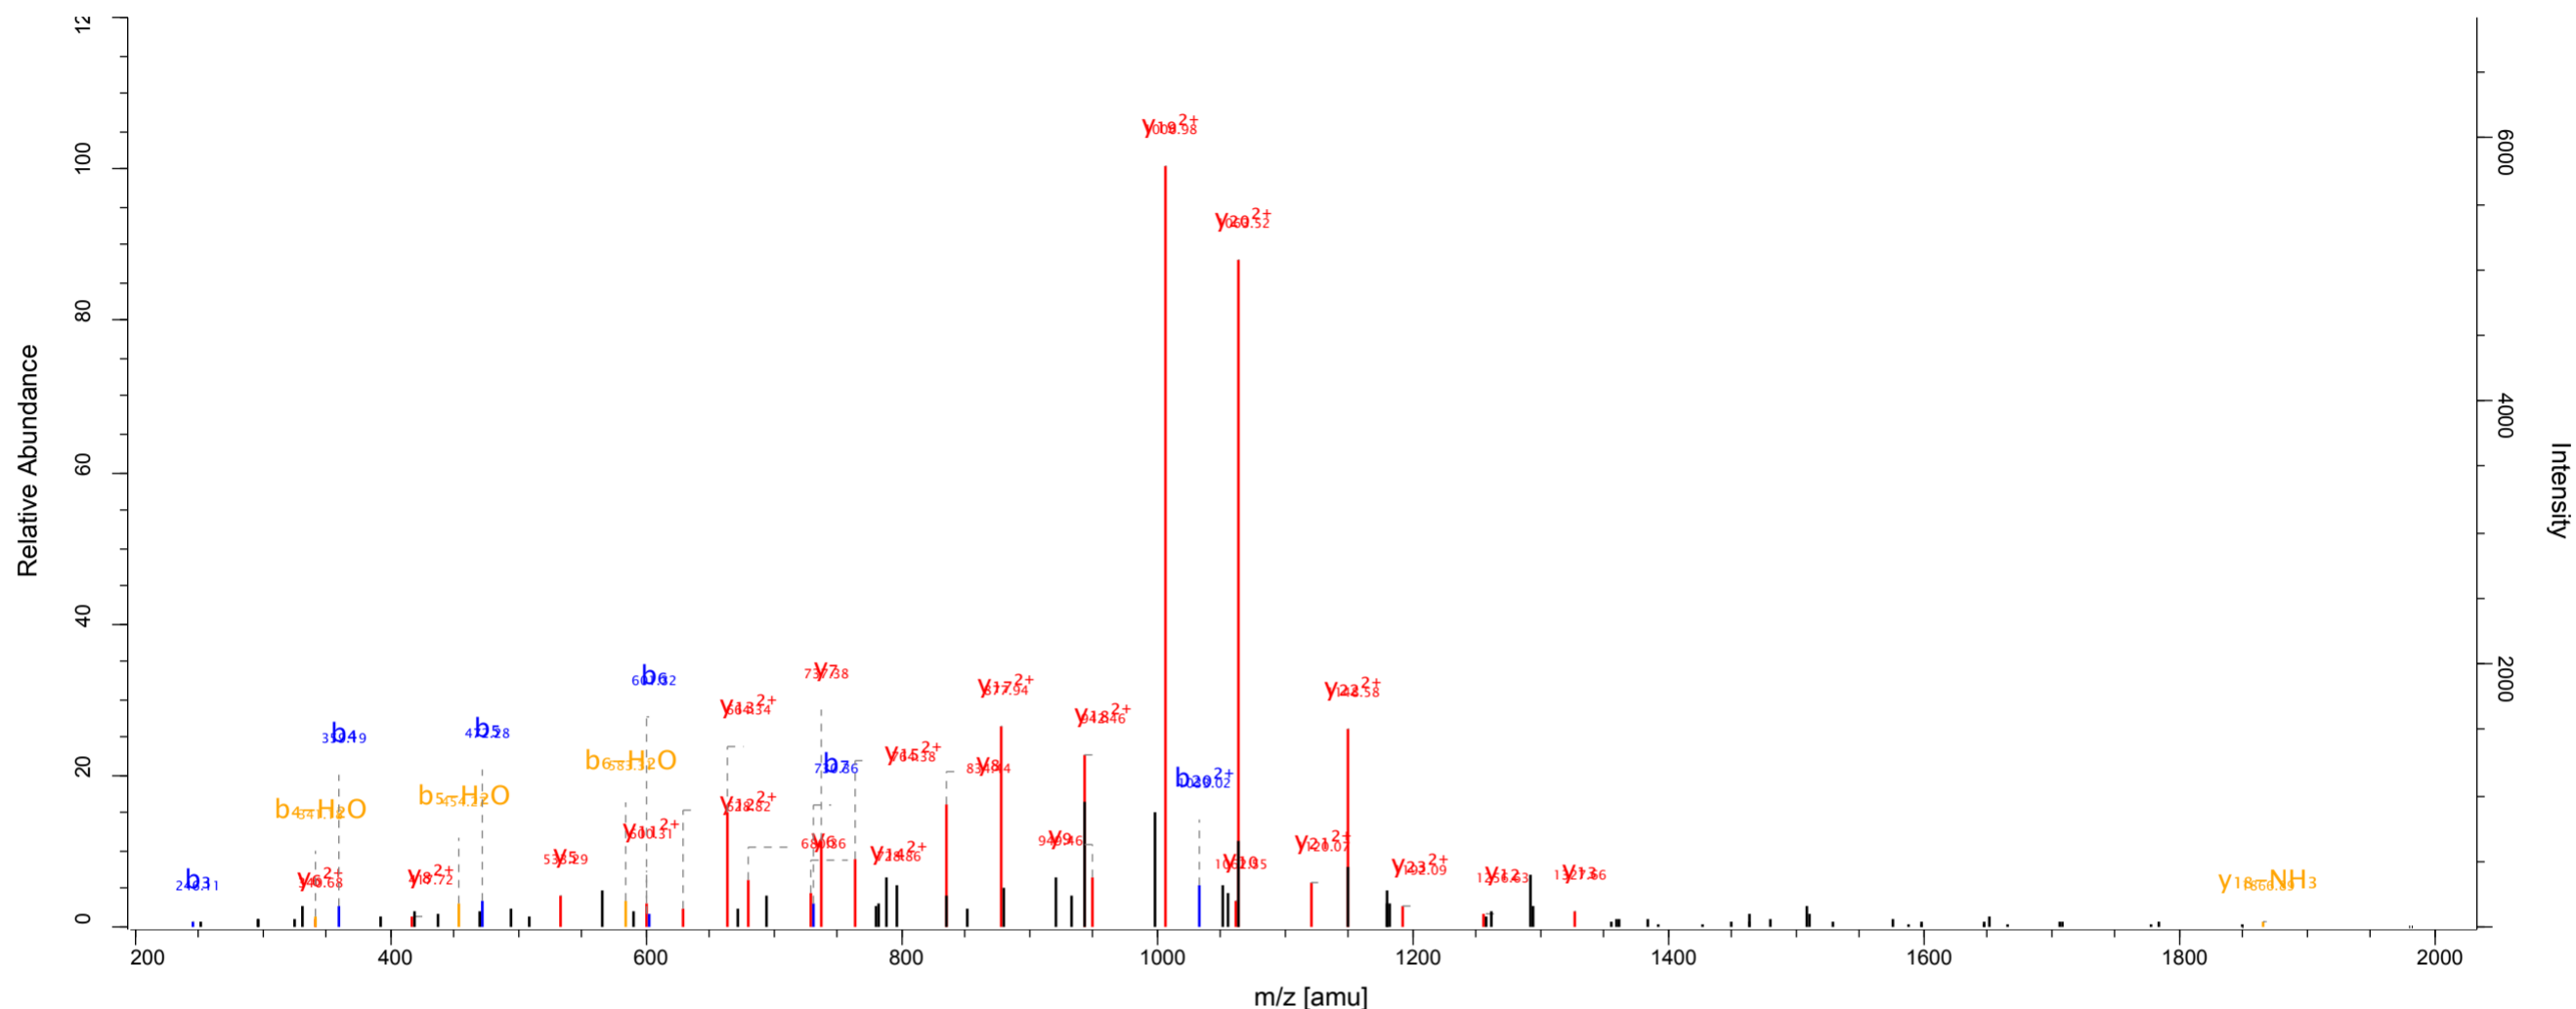

precursor information

|                   |                  |
|-------------------|------------------|
| Mass:             | 2482.21842       |
| m/z:              | 828.74675        |
| Charge:           | 2+               |
| Retention time:   | 108.024280205508 |
| Score:            | 145.4257         |
| Mass Error (ppm): | 0.17407          |
| DEP:              | 2.20565 17       |
| Precursor Type:   | ISO              |

| b <sup>2+</sup> ion |              | b ion      |              |    |     |    | y ion        |            | y <sup>2+</sup> ion |            |
|---------------------|--------------|------------|--------------|----|-----|----|--------------|------------|---------------------|------------|
| Δ dalton            | mass         | Δ dalton   | mass         |    | seq |    | Δ dalton     | mass       | Δ dalton            | mass       |
|                     | 102.05495494 |            | 102.05495494 | 1  | T   | 23 |              |            |                     |            |
|                     | 189.08698335 |            | 189.08698335 | 2  | S   | 22 | 2383.1775959 |            | 1192.0924362        | +0.1818558 |
|                     | 246.10844707 | +0.1410952 | 246.10844707 | 3  | G   | 21 | 2296.1455674 |            | 1148.576422         | +0.2241152 |
|                     | 359.19251105 | -0.0786805 | 359.19251105 | 4  | I   | 20 | 2239.1241037 |            | 1120.0656901        | +0.3558187 |
|                     | 472.27657503 | +0.0262204 | 472.27657503 | 5  | I   | 19 | 2126.0400397 |            | 1063.5236581        | +0.2466056 |
|                     | 601.31916813 | +0.1365814 | 601.31916813 | 6  | E   | 18 | 2012.9559758 |            | 1006.9816261        | +0.2595848 |
|                     | 730.36176123 | -0.1453306 | 730.36176123 | 7  | E   | 17 | 1883.9133827 |            | 942.46032957        | -0.0199609 |
|                     | 843.44582521 |            | 843.44582521 | 8  | I   | 16 | 1754.8707896 |            | 877.93903302        | +0.1598439 |
|                     | 957.48875265 |            | 957.48875265 | 9  | N   | 15 | 1641.7867256 |            | 1641.7867256        |            |
|                     | 1028.5258664 |            | 1028.5258664 | 10 | A   | 14 | 1527.7437981 |            | 764.3755373         | +0.1906858 |
|                     | 1157.5684595 |            | 1157.5684595 | 11 | E   | 13 | 1456.7066844 |            | 728.85698041        | +0.1820821 |
|                     | 1228.6055733 |            | 1228.6055733 | 12 | A   | 12 | 1327.6640913 | -0.0176069 | 664.33568386        | +0.1930637 |
|                     | 1285.6270371 |            | 1285.6270371 | 13 | G   | 11 | 1256.6269775 | -0.3290038 | 628.81712697        | +0.0586665 |
|                     | 1422.6859489 |            | 1422.6859489 | 14 | H   | 10 | 1199.6055137 |            | 600.30639511        | +0.4569106 |
|                     | 1535.7700129 |            | 1535.7700129 | 15 | I   | 9  | 1062.5466019 | -0.1910111 | 1062.5466019        |            |
|                     | 1650.7969559 |            | 1650.7969559 | 16 | D   | 8  | 949.4625379  | +0.0032214 | 949.4625379         |            |
|                     | 1747.8497198 |            | 1747.8497198 | 17 | P   | 7  | 834.43559487 | -0.012194  | 417.72143567        | -0.0802614 |
|                     | 1804.8711835 |            | 1804.8711835 | 18 | G   | 6  | 737.38283102 | -0.0162539 | 737.38283102        |            |
|                     | 1951.9395974 |            | 1951.9395974 | 19 | F   | 5  | 680.3613673  | -0.1448146 | 340.68432188        | -0.3655353 |
| -0.2019924          | 1033.0154689 |            | 2065.0236614 | 20 | I   | 4  | 533.29295338 | -0.2595061 | 533.29295338        |            |
|                     | 2136.0607752 |            | 2136.0607752 | 21 | A   | 3  | 420.2088894  |            | 420.2088894         |            |
|                     | 2223.0928036 |            | 2223.0928036 | 22 | S   | 2  | 349.17177561 |            | 349.17177561        |            |
|                     | 2338.1197466 |            | 2338.1197466 | 23 | D   | 1  | 262.1397472  |            | 262.1397472         |            |
|                     |              |            |              | 24 | K   | 0  | 147.11280417 |            | 147.11280417        |            |

general information

|                       |             |
|-----------------------|-------------|
| Annotation:           | 18 of 24    |
| AminoAcids Coverage:  | 75 %        |
| Intensity Coverage:   | 68 %        |
| Peak Coverage:        | 22 %        |
| Protein Localisation: | 288 ... 311 |



Scan number 20312 Raw file 20091015\_Orbi6\_MaHe\_SA\_ADH\_exp3\_Susp\_Gel12  
 Method ITMS; CID Genenames PHF19

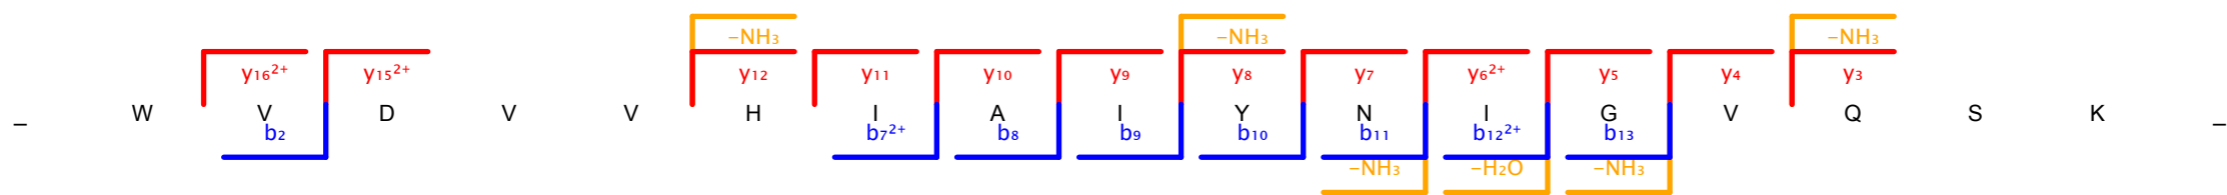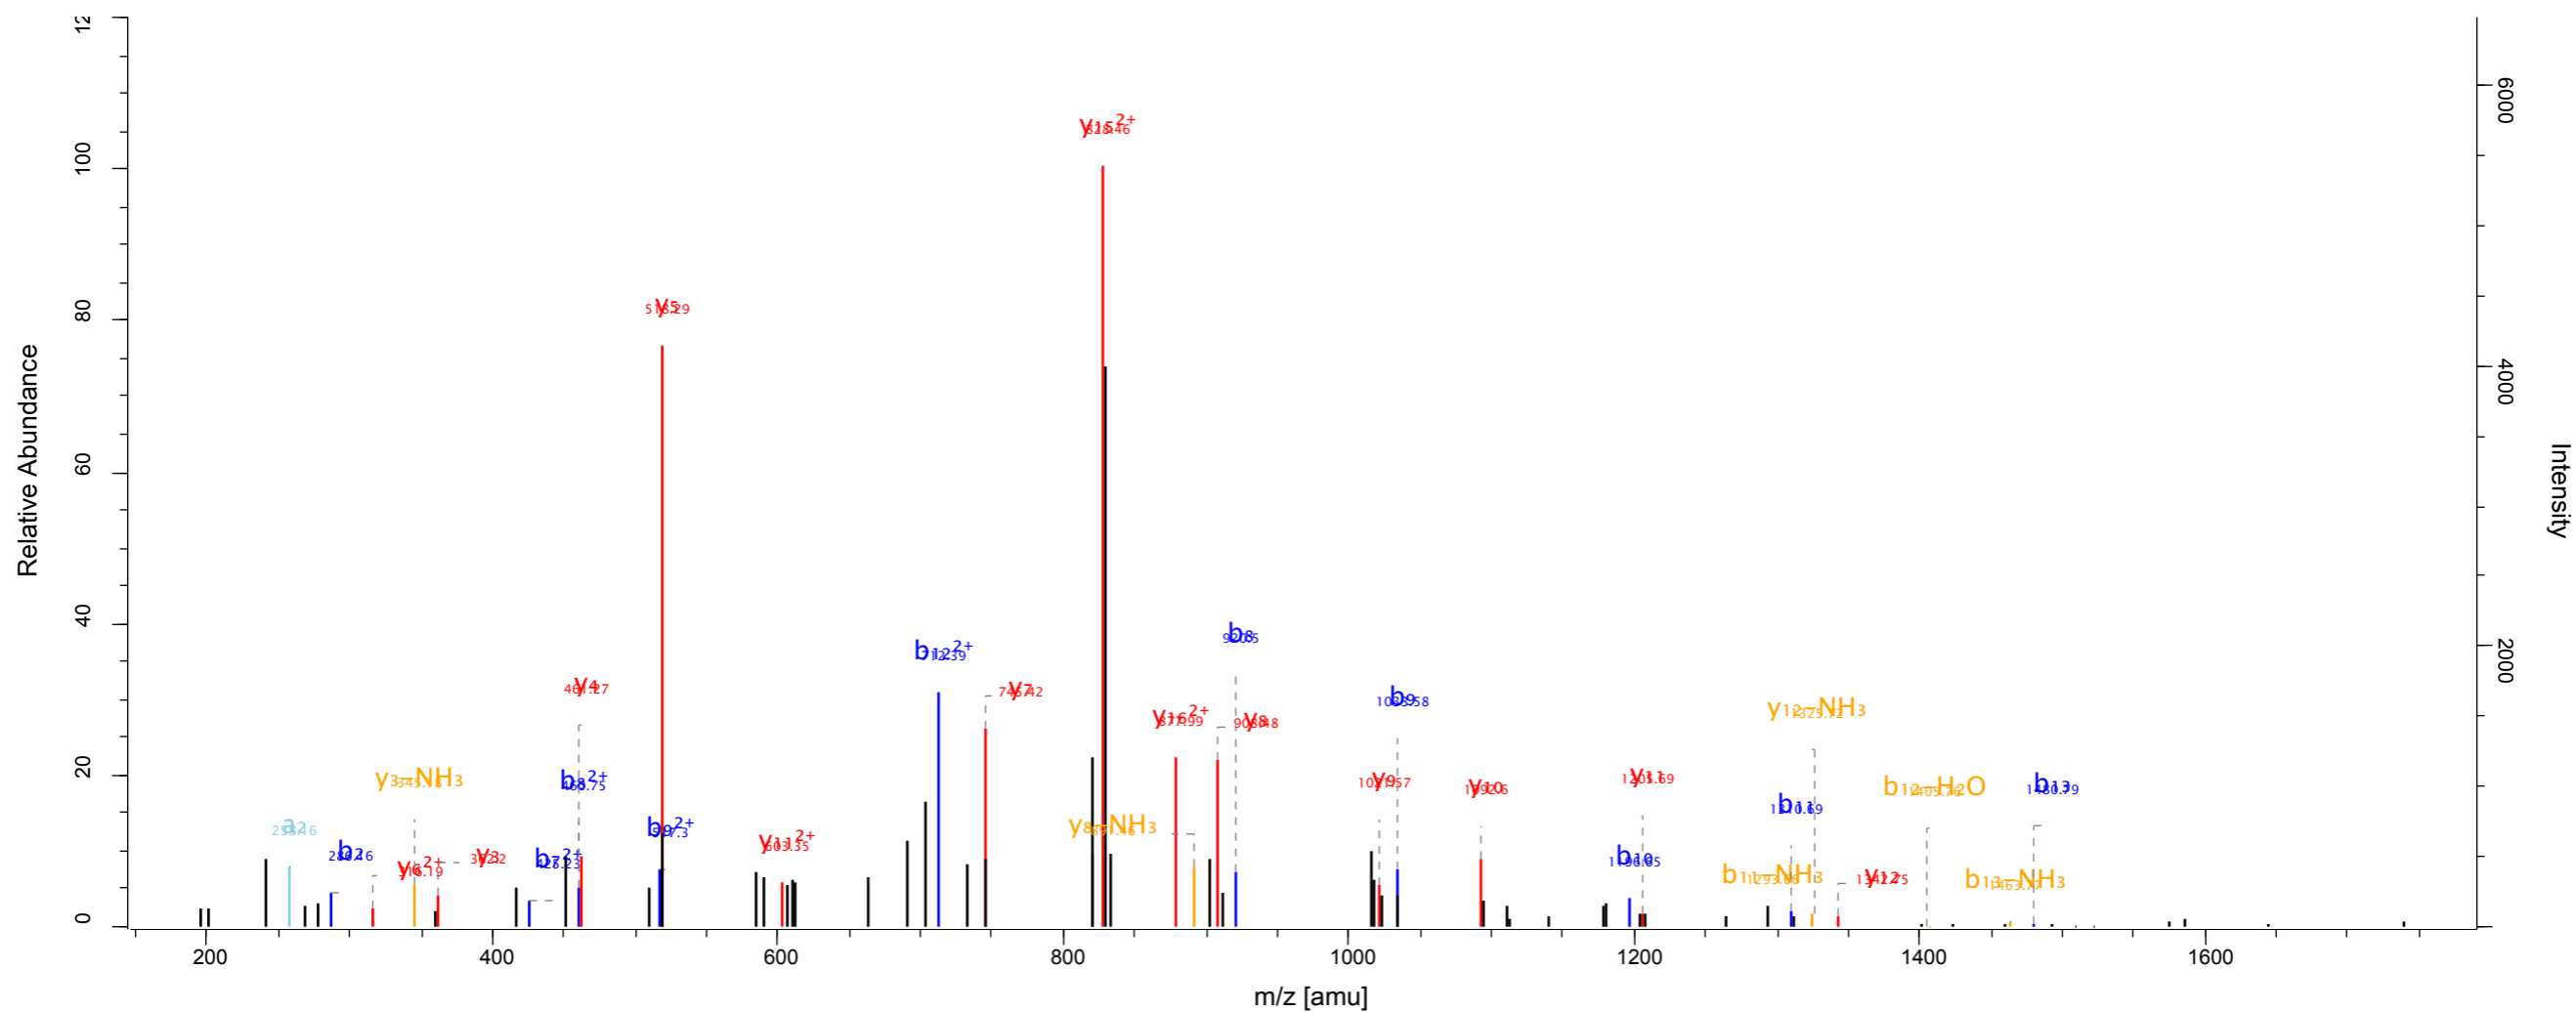

precursor information

|                   |                  |
|-------------------|------------------|
| Mass:             | 1040.0510        |
| m/z:              | 647.60124        |
| Charge:           | 2+               |
| Retention time:   | 11.5727005272428 |
| Score:            | 168.8851         |
| Mass Error [ppm]: | -0.044224        |
| PEP:              | 1.0810E-11       |
| Precursor Type:   | ISO              |

| a ion      |            | b <sup>2+</sup> ion |            | b ion      |            |    |     |    | y ion      |            | y <sup>2+</sup> ion |            |
|------------|------------|---------------------|------------|------------|------------|----|-----|----|------------|------------|---------------------|------------|
| Δ dalton   | mass       | Δ dalton            | mass       | Δ dalton   | mass       |    | seq |    | Δ dalton   | mass       | Δ dalton            | mass       |
|            | 159.091675 |                     | 187.086589 |            | 187.086589 | 1  | W   | 16 |            |            |                     |            |
| +0.0731266 | 258.160089 |                     | 286.155003 | -0.0707748 | 286.155003 | 2  | V   | 15 | 1754.97995 |            | 877.993611          | +0.1973067 |
|            | 373.187032 |                     | 401.181946 |            | 401.181946 | 3  | D   | 14 | 1655.91153 |            | 828.459404          | -0.0408863 |
|            | 472.255446 |                     | 500.25036  |            | 500.25036  | 4  | V   | 13 | 1540.88459 |            | 1540.88459          |            |
|            | 571.32386  |                     | 599.318774 |            | 599.318774 | 5  | V   | 12 | 1441.81618 |            | 1441.81618          |            |
|            | 708.382771 |                     | 736.377686 |            | 736.377686 | 6  | H   | 11 | 1342.74776 | -0.0658765 | 1342.74776          |            |
|            | 821.466835 | +0.0851889          | 425.234513 |            | 849.46175  | 7  | I   | 10 | 1205.68885 | +0.0786066 | 603.348063          | -0.0176186 |
|            | 892.503949 | -0.1233704          | 460.75307  | -0.1239249 | 920.498864 | 8  | A   | 9  | 1092.60479 | -0.0747562 | 1092.60479          |            |
|            | 1005.58801 | +0.3320951          | 517.295102 | -0.1649591 | 1033.58293 | 9  | I   | 8  | 1021.56767 | -0.3061971 | 1021.56767          |            |
|            | 1168.65134 |                     | 1196.64626 | -0.1014565 | 1196.64626 | 10 | Y   | 7  | 908.483608 | -0.0719866 | 908.483608          |            |
|            | 1282.69427 |                     | 1310.68918 | -0.3465324 | 1310.68918 | 11 | N   | 6  | 745.420279 | +0.0362028 | 745.420279          |            |
|            | 1395.77833 | +0.1066251          | 712.390262 |            | 1423.77325 | 12 | I   | 5  | 631.377352 |            | 316.192314          | +0.0377274 |
|            | 1452.7998  |                     | 1480.79471 | -0.1136812 | 1480.79471 | 13 | G   | 4  | 518.293288 | +0.0052352 | 518.293288          |            |
|            | 1551.86821 |                     | 1579.86313 |            | 1579.86313 | 14 | V   | 3  | 461.271824 | +0.1156882 | 461.271824          |            |
|            | 1679.92679 |                     | 1707.9217  |            | 1707.9217  | 15 | Q   | 2  | 362.20341  | -0.0509443 | 362.20341           |            |
|            | 1766.95882 |                     | 1794.95373 |            | 1794.95373 | 16 | S   | 1  | 234.144833 |            | 234.144833          |            |
|            |            |                     |            |            |            | 17 | K   | 0  | 147.112804 |            | 147.112804          |            |

general information

|                       |             |
|-----------------------|-------------|
| Annotation:           | 12 of 17    |
| AminoAcids Coverage:  | 71 %        |
| Intensity Coverage:   | 55 %        |
| Peak Coverage:        | 27 %        |
| Protein Localisation: | 260 ... 276 |

Scan number 20410 Raw file 20091015\_Orbi6\_MaHe\_SA\_ADH\_exp3\_Susp\_Gel12  
 Method ITMS; CID Genenames ZBTB44

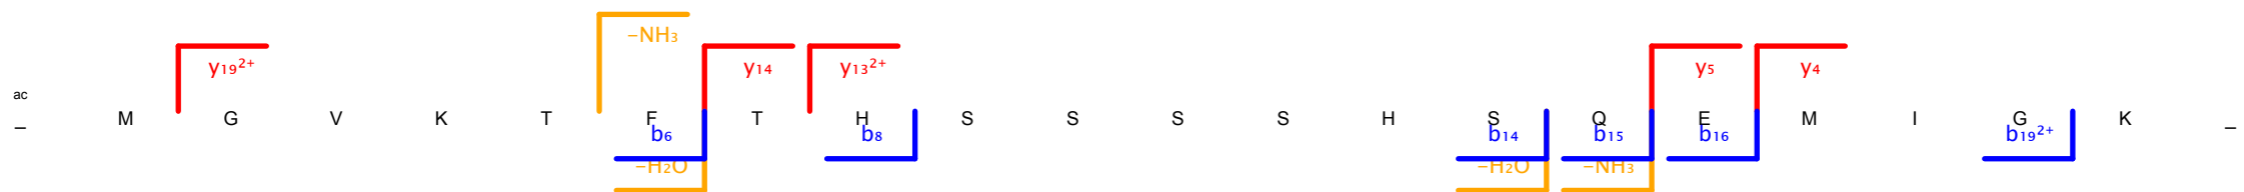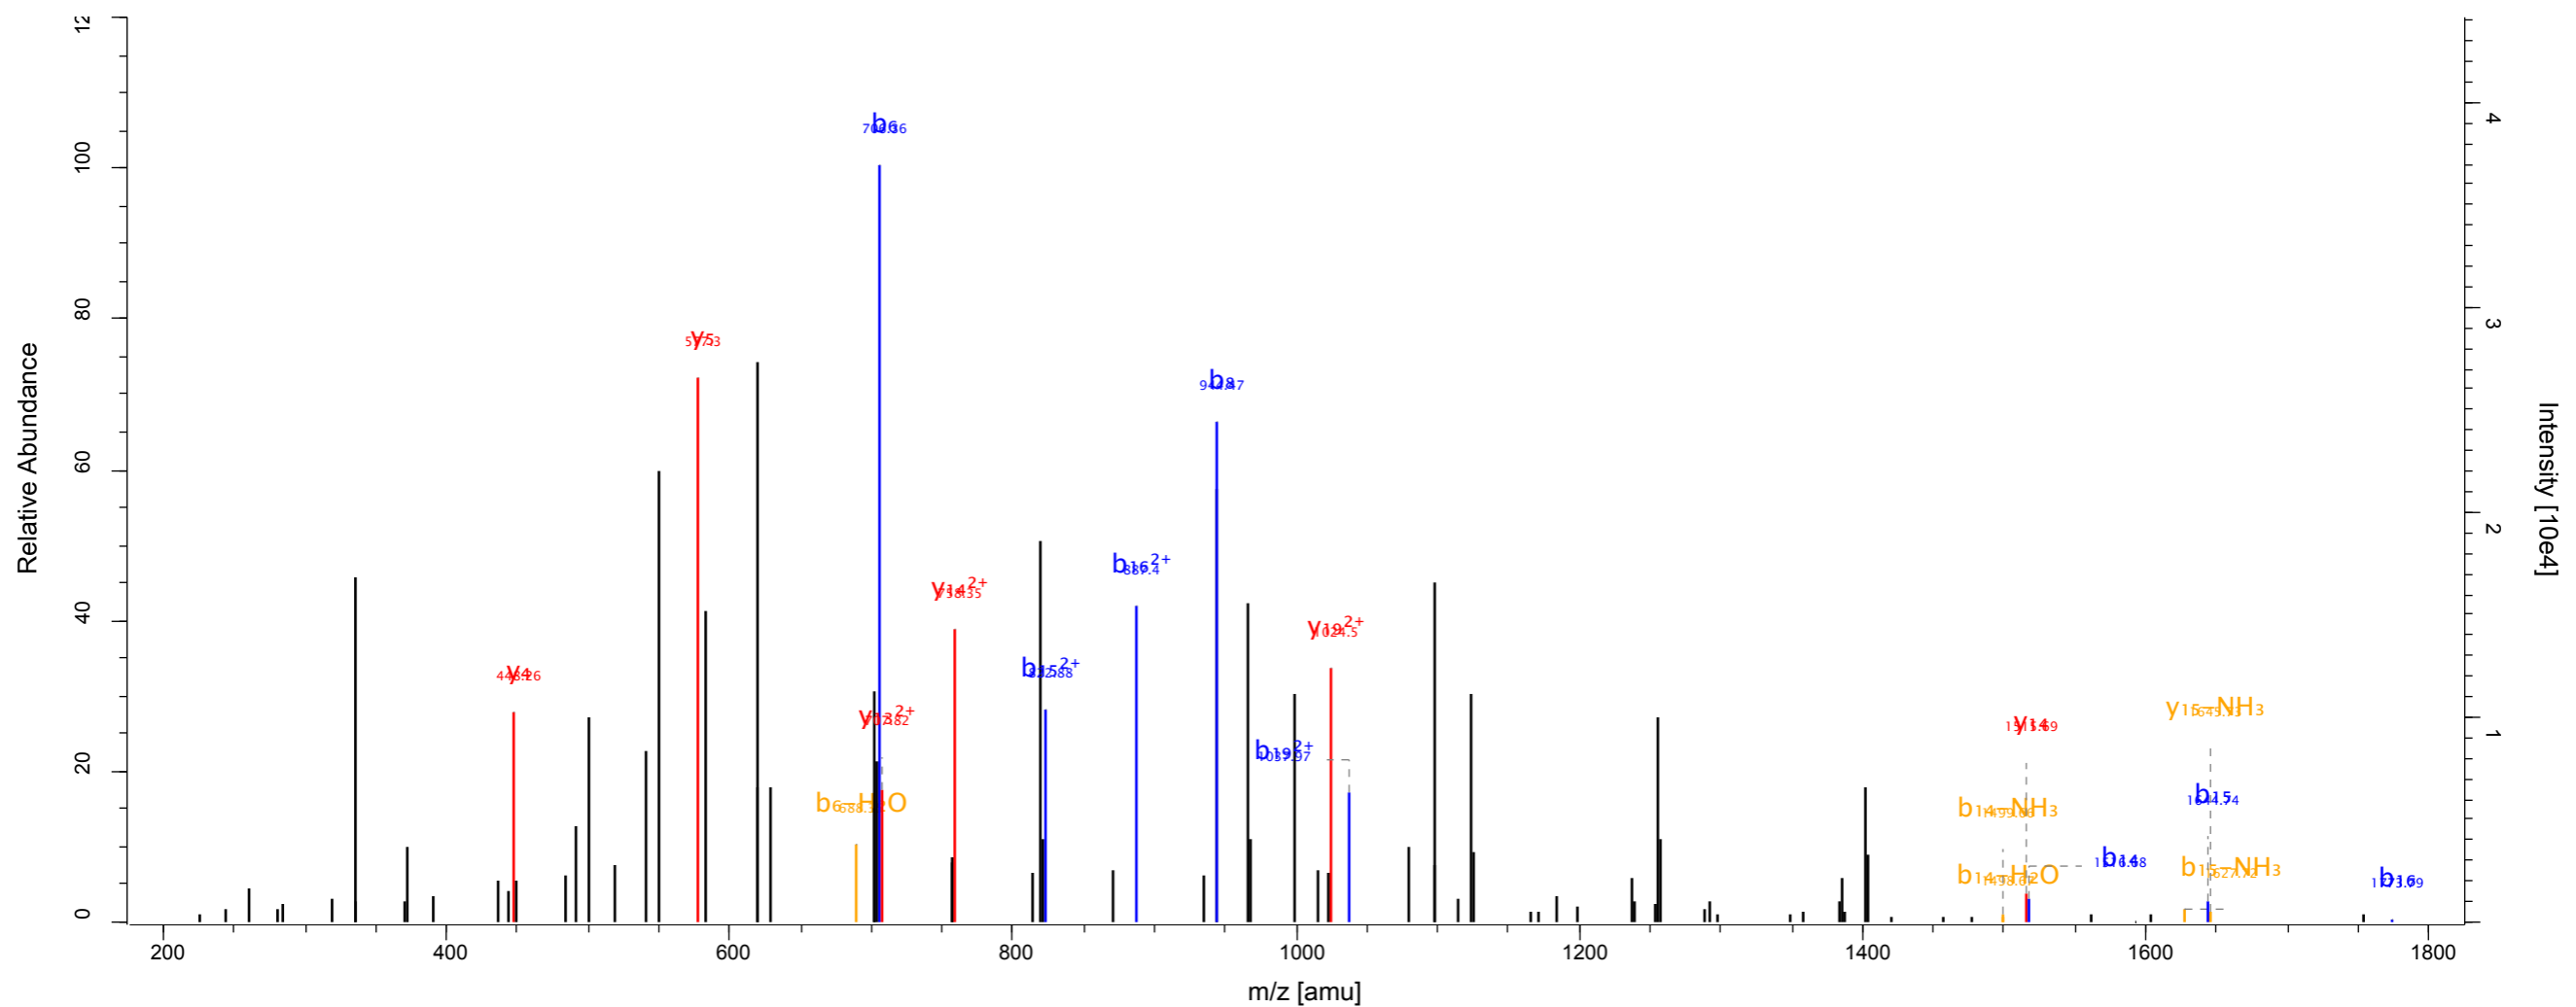

precursor information

|                   |                  |
|-------------------|------------------|
| Mass:             | 2220.02081       |
| m/z:              | 741.01721        |
| Charge:           | 2+               |
| Retention time:   | 116.258401516112 |
| Score:            | 82.00650         |
| Mass Error (ppm): | -0.2375          |
| DEP:              | 0.00025871       |
| Precursor Type:   | MULTI            |

| b <sup>2+</sup> ion |              | b ion      |              |    |     | y ion |              | y <sup>2+</sup> ion |              |            |
|---------------------|--------------|------------|--------------|----|-----|-------|--------------|---------------------|--------------|------------|
| Δ dalton            | mass         | Δ dalton   | mass         |    | seq |       | Δ dalton     | mass                | Δ dalton     | mass       |
|                     | 174.05832576 |            | 174.05832576 | 1  | M   | 19    |              |                     |              |            |
|                     | 231.07978948 |            | 231.07978948 | 2  | G   | 18    | 2047.9865644 |                     | 1024.4969204 | -0.3217495 |
|                     | 330.1482034  |            | 330.1482034  | 3  | V   | 17    | 1990.9651007 |                     | 1990.9651007 |            |
|                     | 458.24316642 |            | 458.24316642 | 4  | K   | 16    | 1891.8966867 |                     | 1891.8966867 |            |
|                     | 559.29084489 |            | 559.29084489 | 5  | T   | 15    | 1763.8017237 |                     | 1763.8017237 |            |
|                     | 706.35925881 | -0.0584776 | 706.35925881 | 6  | F   | 14    | 1662.7540453 |                     | 1662.7540453 |            |
|                     | 807.40693728 |            | 807.40693728 | 7  | T   | 13    | 1515.6856313 | -0.0779653          | 758.3464539  | +0.0817077 |
|                     | 944.46584914 | -0.1450484 | 944.46584914 | 8  | H   | 12    | 1414.6379529 |                     | 707.82261466 | -0.4197216 |
|                     | 1031.4978776 |            | 1031.4978776 | 9  | S   | 11    | 1277.579041  |                     | 1277.579041  |            |
|                     | 1118.529906  |            | 1118.529906  | 10 | S   | 10    | 1190.5470126 |                     | 1190.5470126 |            |
|                     | 1205.5619344 |            | 1205.5619344 | 11 | S   | 9     | 1103.5149842 |                     | 1103.5149842 |            |
|                     | 1292.5939628 |            | 1292.5939628 | 12 | S   | 8     | 1016.4829558 |                     | 1016.4829558 |            |
|                     | 1429.6528746 |            | 1429.6528746 | 13 | H   | 7     | 929.45092736 |                     | 929.45092736 |            |
|                     | 1516.6849031 | +0.0185882 | 1516.6849031 | 14 | S   | 6     | 792.3920155  |                     | 792.3920155  |            |
| +0.1432982          | 822.87537852 | -0.0900382 | 1644.7434806 | 15 | Q   | 5     | 705.35998709 |                     | 705.35998709 |            |
| +0.0603562          | 887.39667506 | -0.2888813 | 1773.7860737 | 16 | E   | 4     | 577.30140958 | -0.0388974          | 577.30140958 |            |
|                     | 1904.8265583 |            | 1904.8265583 | 17 | M   | 3     | 448.25881648 | -0.0639312          | 448.25881648 |            |
|                     | 2017.9106222 |            | 2017.9106222 | 18 | I   | 2     | 317.21833187 |                     | 317.21833187 |            |
| -0.4655308          | 1037.9696812 |            | 2074.932086  | 19 | G   | 1     | 204.13426789 |                     | 204.13426789 |            |
|                     |              |            |              | 20 | K   | 0     | 147.11280417 |                     | 147.11280417 |            |

general information

|                       |          |
|-----------------------|----------|
| Annotation:           | 0 of 20  |
| AminoAcids Coverage:  | 45 %     |
| Intensity Coverage:   | 24 %     |
| Peak Coverage:        | 21 %     |
| Protein Localisation: | 1 ... 20 |

Scan number 20704 Raw file 20091015\_Orbi6\_MaHe\_SA\_ADH\_exp3\_Susp\_Gel15  
 Method ITMS; CID Genenames NOLC1

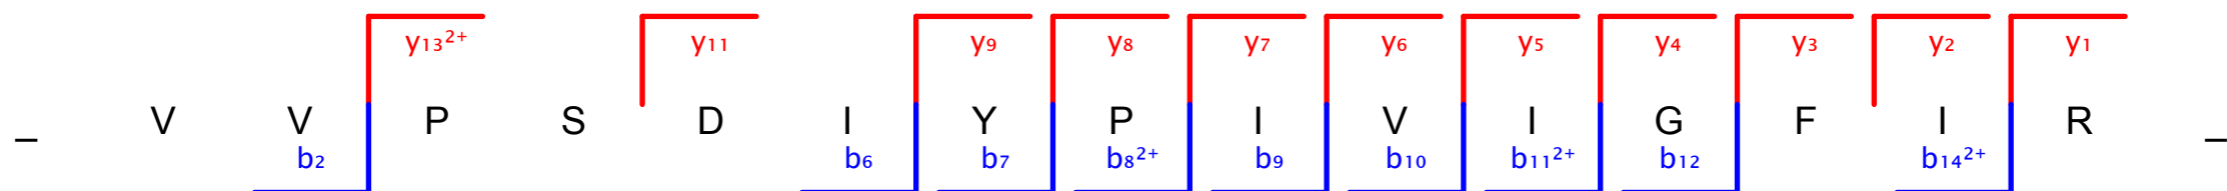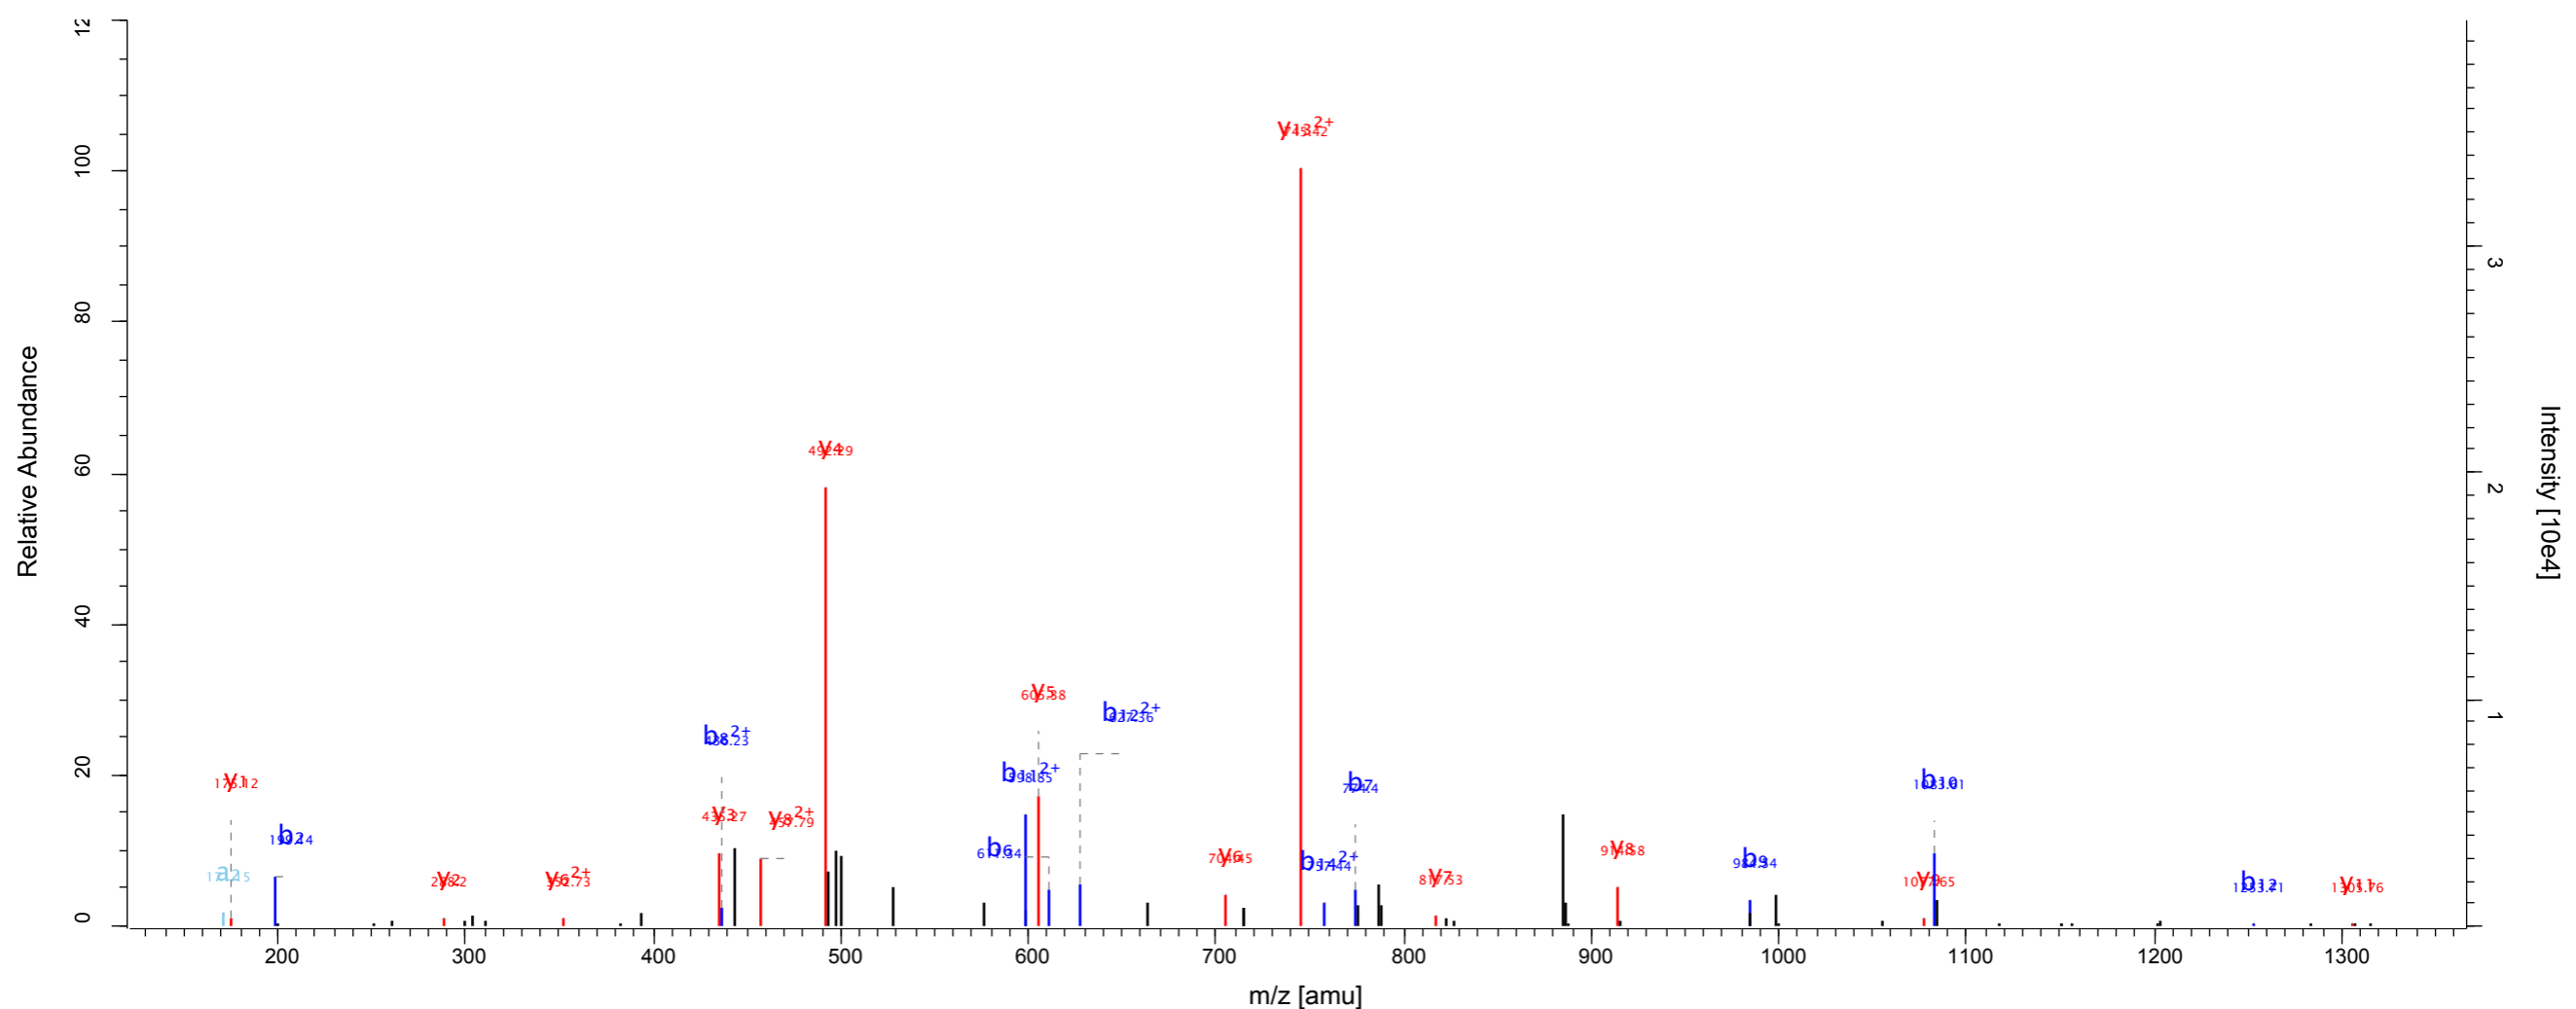

precursor information

|                   |                  |
|-------------------|------------------|
| Mass:             | 1686.07082       |
| m/z:              | 562.23080        |
| Charge:           | 2+               |
| Potentia time:    | 110.667000267578 |
| Score:            | 150.6020         |
| Mass Error [ppm]: | -0.020526        |
| DEP:              | 6.2664E-06       |
| Precursor Type:   | ISO              |

| a ion      |            | b <sup>2+</sup> ion |            | b ion      |            |    |     |    | y ion      |            | y <sup>2+</sup> ion |            |
|------------|------------|---------------------|------------|------------|------------|----|-----|----|------------|------------|---------------------|------------|
| Δ dalton   | mass       | Δ dalton            | mass       | Δ dalton   | mass       |    | seq |    | Δ dalton   | mass       | Δ dalton            | mass       |
|            | 72.0807758 |                     | 100.07569  |            | 100.07569  | 1  | V   | 14 |            |            |                     |            |
| -0.0835616 | 171.14919  |                     | 199.144104 | +0.0122373 | 199.144104 | 2  | V   | 13 | 1588.90974 |            | 1588.90974          |            |
|            | 268.201954 |                     | 296.196868 |            | 296.196868 | 3  | P   | 12 | 1489.84133 |            | 745.424302          | +0.1426537 |
|            | 355.233982 |                     | 383.228897 |            | 383.228897 | 4  | S   | 11 | 1392.78856 |            | 1392.78856          |            |
|            | 470.260925 |                     | 498.25584  |            | 498.25584  | 5  | D   | 10 | 1305.75654 | -0.2089277 | 1305.75654          |            |
|            | 583.344989 |                     | 611.339904 | -0.0877063 | 611.339904 | 6  | I   | 9  | 1190.72959 |            | 1190.72959          |            |
|            | 746.408317 |                     | 774.403232 | -0.1755099 | 774.403232 | 7  | Y   | 8  | 1077.64553 | -0.0844929 | 1077.64553          |            |
|            | 843.461081 | +0.0967329          | 436.231636 |            | 871.455996 | 8  | P   | 7  | 914.5822   | -0.1390843 | 457.794738          | -0.0427238 |
|            | 956.545145 |                     | 984.54006  | -0.3691615 | 984.54006  | 9  | I   | 6  | 817.529436 | +0.2472977 | 817.529436          |            |
|            | 1055.61356 |                     | 1083.60847 | -0.1631614 | 1083.60847 | 10 | V   | 5  | 704.445372 | +0.123476  | 352.726324          | +0.0343571 |
|            | 1168.69762 | +0.04615            | 598.849907 |            | 1196.69254 | 11 | I   | 4  | 605.376958 | +0.0557204 | 605.376958          |            |
|            | 1225.71909 | -0.0455755          | 627.360639 | -0.1651734 | 1253.714   | 12 | G   | 3  | 492.292894 | +0.0367571 | 492.292894          |            |
|            | 1372.7875  |                     | 1400.78242 |            | 1400.78242 | 13 | F   | 2  | 435.27143  | +0.0437555 | 435.27143           |            |
|            | 1485.87156 | -0.1030767          | 757.436878 |            | 1513.86648 | 14 | I   | 1  | 288.203016 | +0.0817128 | 288.203016          |            |
|            |            |                     |            |            |            | 15 | R   | 0  | 175.118952 | +0.0751244 | 175.118952          |            |

general information

|                       |          |
|-----------------------|----------|
| Annotation:           | 13 of 15 |
| AminoAcids Coverage:  | 87%      |
| Intensity Coverage:   | 72%      |
| Peak Coverage:        | 27%      |
| Protein Localisation: | 9 ... 23 |

Scan number 18835 Raw file 20091015\_Orbi6\_MaHe\_SA\_ADH\_exp3\_Susp\_Gel16  
 Method ITMS; CID Pepti... 180.48

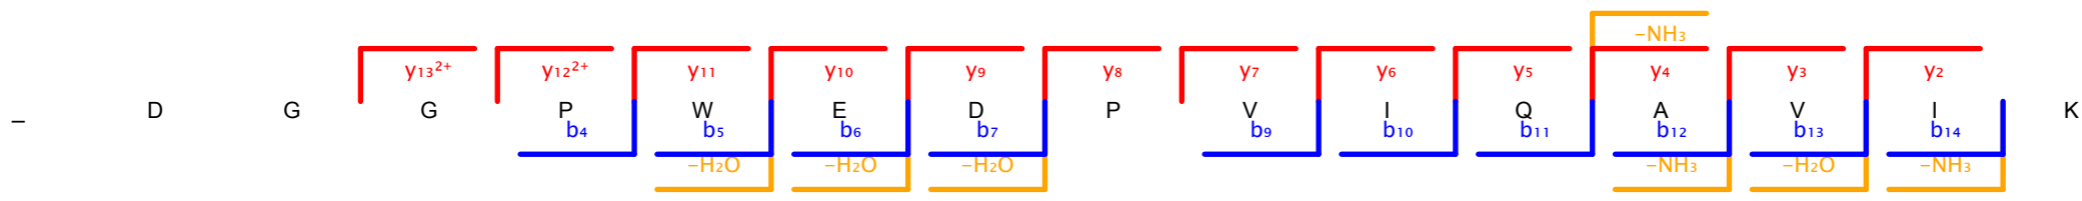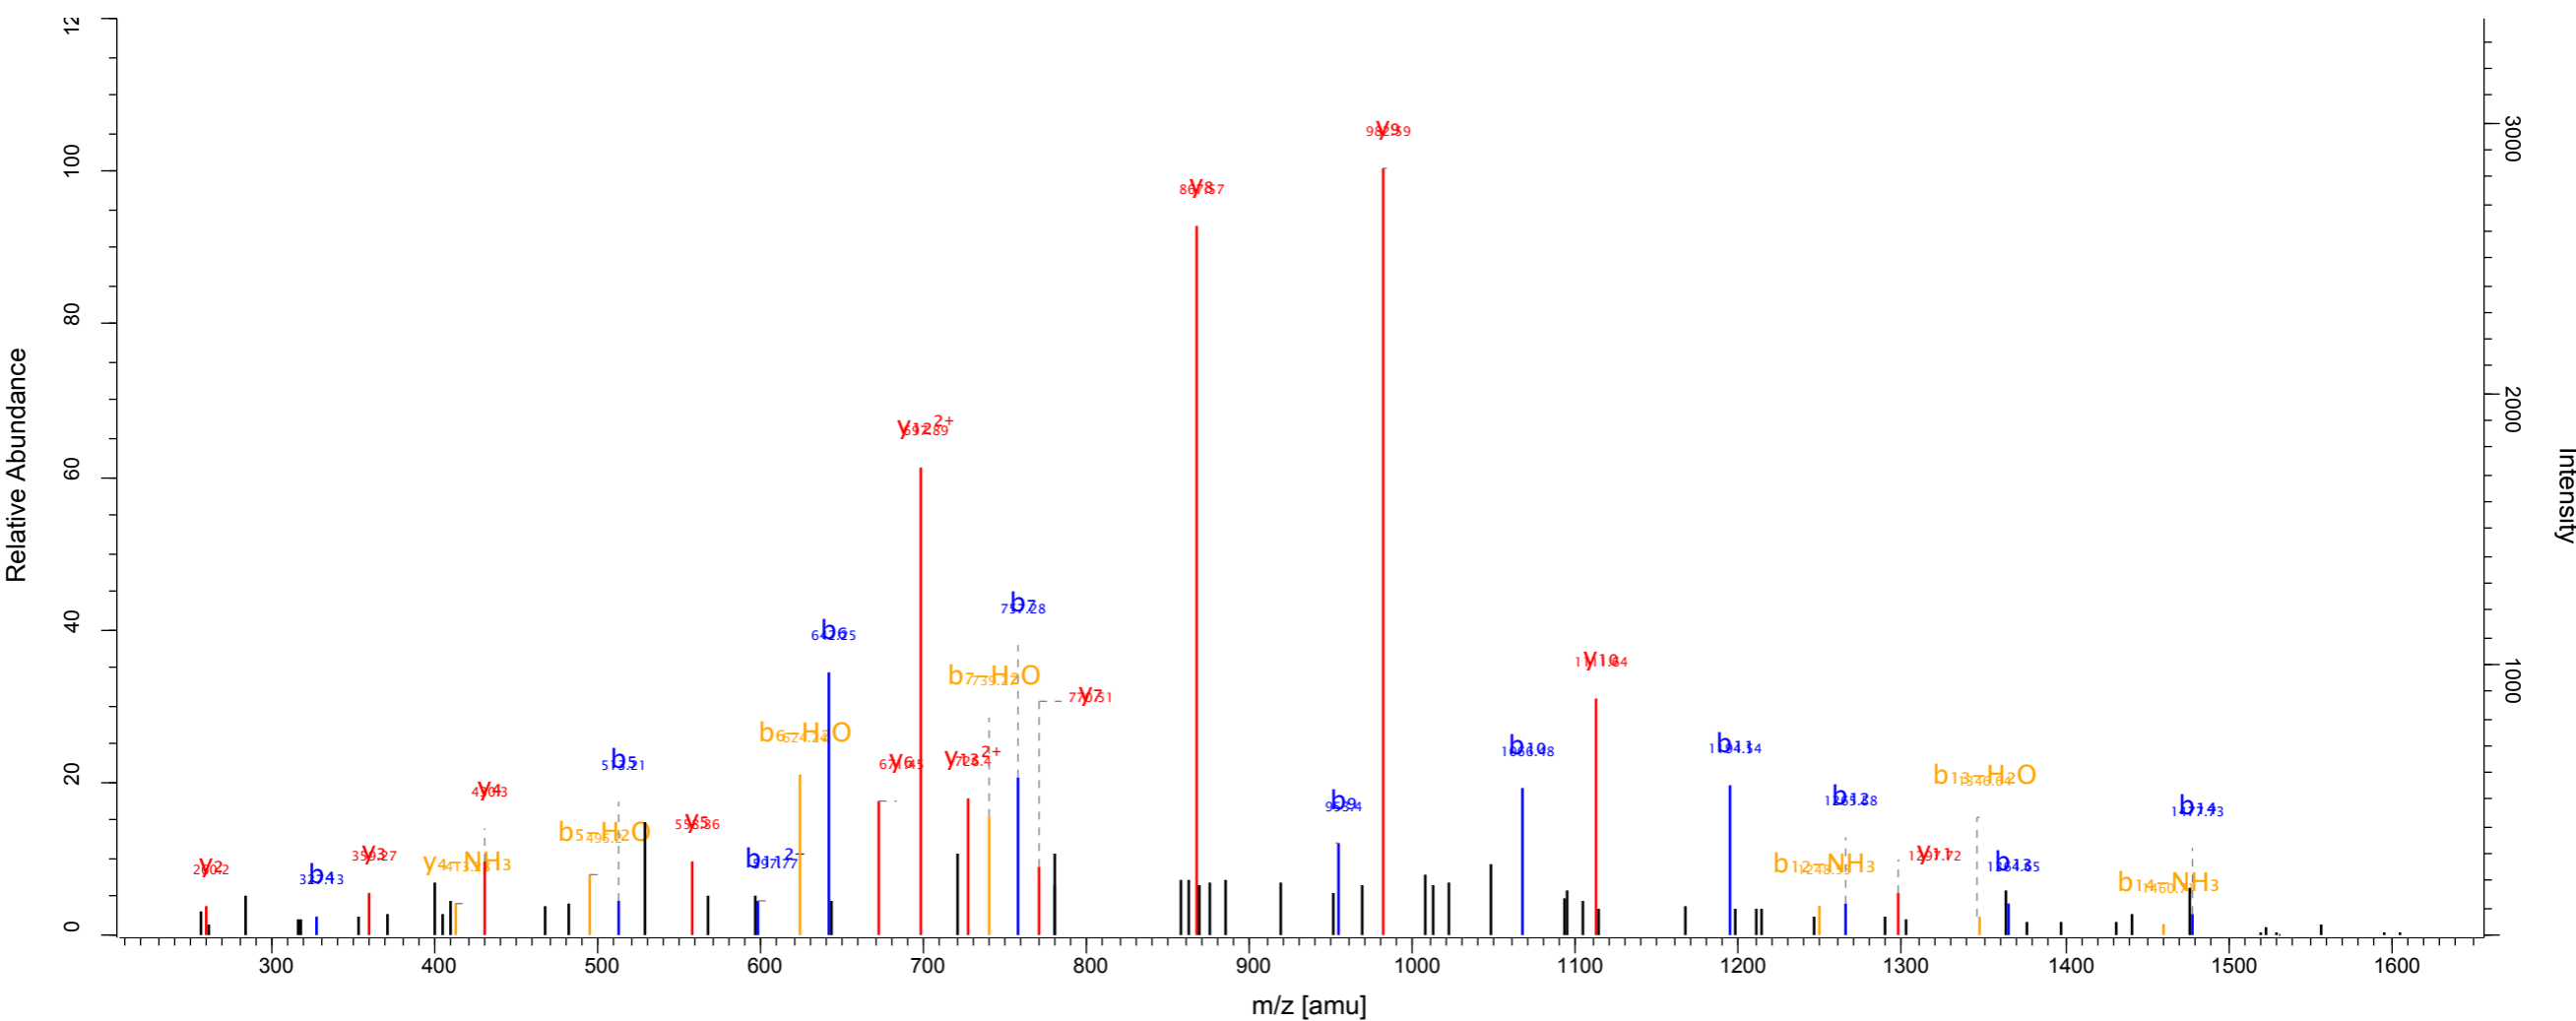

precursor information

|                   |                  |
|-------------------|------------------|
| Mass:             | 1622.82001       |
| m/z:              | 812.42222        |
| Charge:           | 2+               |
| Potentia time:    | 100.847541800082 |
| Score:            | 180.4701         |
| Mass Error [ppm]: | 0.2140           |
| PEP:              | 5.2471E-14       |
| Precursor Type:   | ISO              |

general information

|                       |             |
|-----------------------|-------------|
| Annotation:           | 12 of 15    |
| AminoAcids Coverage:  | 80 %        |
| Intensity Coverage:   | 60 %        |
| Peak Coverage:        | 25 %        |
| Protein Localisation: | 161 ... 175 |

| b <sup>2+</sup> ion |              | b ion      |              |    |     |    | y ion        |            | y <sup>2+</sup> ion |            |
|---------------------|--------------|------------|--------------|----|-----|----|--------------|------------|---------------------|------------|
| Δ dalton            | mass         | Δ dalton   | mass         |    | seq |    | Δ dalton     | mass       | Δ dalton            | mass       |
|                     | 116.0342195  |            | 116.0342195  | 1  | D   | 14 |              |            |                     |            |
|                     | 173.05568322 |            | 173.05568322 | 2  | G   | 13 | 1508.8107555 |            | 1508.8107555        |            |
|                     | 230.07714695 |            | 230.07714695 | 3  | G   | 12 | 1451.7892918 |            | 726.39828412        | -0.0310966 |
|                     | 327.1299108  | +0.2276331 | 327.1299108  | 4  | P   | 11 | 1394.767828  |            | 697.88755226        | -0.0697422 |
|                     | 513.20922375 | -0.0512037 | 513.20922375 | 5  | W   | 10 | 1297.7150642 | -0.0557624 | 1297.7150642        |            |
|                     | 642.25181685 | -0.0369731 | 642.25181685 | 6  | E   | 9  | 1111.6357512 | -0.1136565 | 1111.6357512        |            |
|                     | 757.27875988 | +0.0809813 | 757.27875988 | 7  | D   | 8  | 982.59315815 | -0.1082338 | 982.59315815        |            |
|                     | 854.33152373 |            | 854.33152373 | 8  | P   | 7  | 867.56621512 | -0.1328045 | 867.56621512        |            |
|                     | 953.39993765 | +0.1349745 | 953.39993765 | 9  | V   | 6  | 770.51345126 | +0.0416024 | 770.51345126        |            |
|                     | 1066.4840016 | -0.1335378 | 1066.4840016 | 10 | I   | 5  | 671.44503735 | +0.0437932 | 671.44503735        |            |
| +0.2206166          | 597.7749278  | -0.1314463 | 1194.5425791 | 11 | Q   | 4  | 558.36097337 | -0.035717  | 558.36097337        |            |
|                     | 1265.5796929 | -0.2648736 | 1265.5796929 | 12 | A   | 3  | 430.30239586 | +0.0152311 | 430.30239586        |            |
|                     | 1364.6481068 | +0.0862682 | 1364.6481068 | 13 | V   | 2  | 359.26528207 | -0.1548084 | 359.26528207        |            |
|                     | 1477.7321708 | +0.2369454 | 1477.7321708 | 14 | I   | 1  | 260.19686815 | -0.0476982 | 260.19686815        |            |
|                     |              |            |              | 15 | K   | 0  | 147.11280417 |            | 147.11280417        |            |

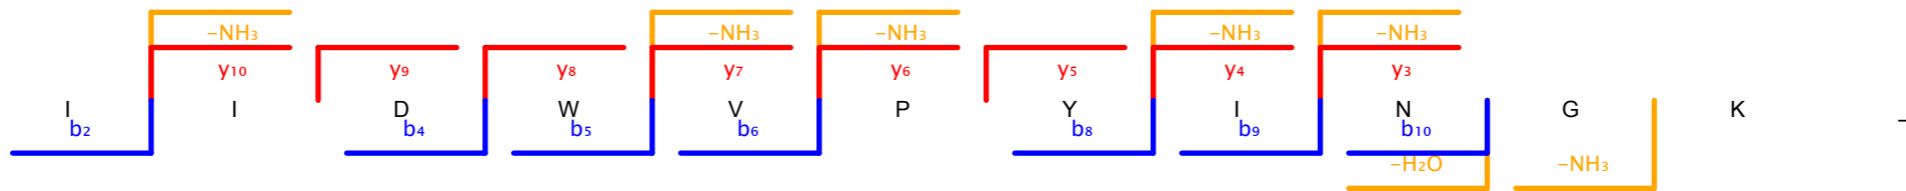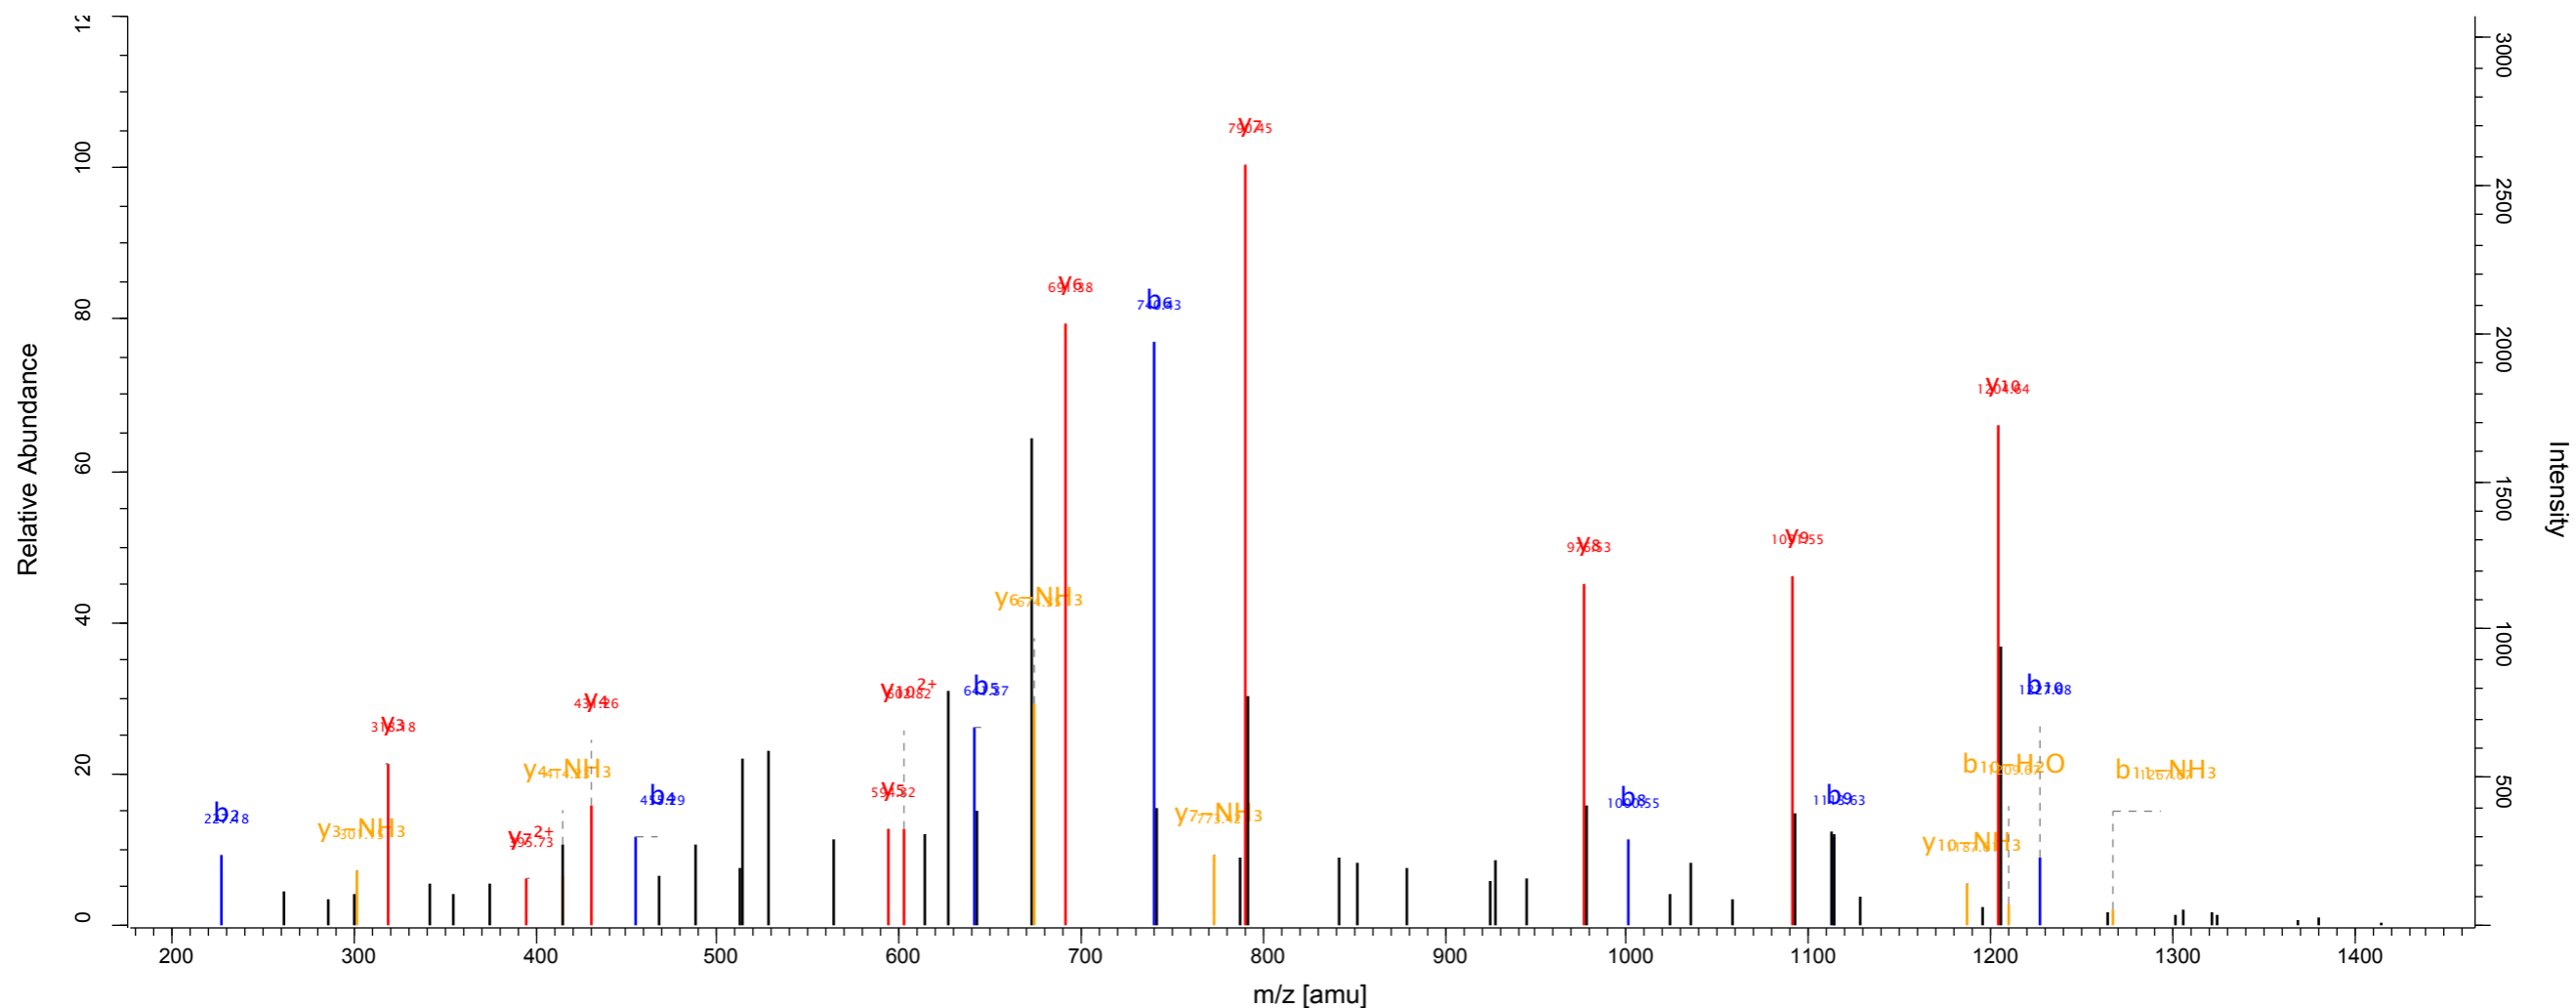

precursor information

|                   |                  |
|-------------------|------------------|
| Mass:             | 1429.70744       |
| m/z:              | 715.906          |
| Charge:           | 2+               |
| Retention time:   | 100.068000075586 |
| Score:            | 167.1151         |
| Mass Error (ppm): | 0.35304          |
| PEP:              | 2.4410E-05       |
| Precursor Type:   | MULTI            |

general information

|                       |           |
|-----------------------|-----------|
| Annotation:           | 10 of 12  |
| AminoAcids Coverage:  | 82 %      |
| Intensity Coverage:   | 57 %      |
| Peak Coverage:        | 25 %      |
| Protein Localisation: | 40 ... 51 |

| b ion      |                |    |     |    | y ion          |            | y <sup>2+</sup> ion |            |
|------------|----------------|----|-----|----|----------------|------------|---------------------|------------|
| Δ dalton   | mass           |    | seq |    | Δ dalton       | mass       | Δ dalton            | mass       |
|            | 114.091340447  | 1  | I   | 11 |                |            |                     |            |
| -0.0872697 | 227.175404427  | 2  | I   | 10 | 1317.720149575 |            | 1317.720149575      |            |
|            | 340.259468408  | 3  | I   | 9  | 1204.636085594 | -0.2139665 | 602.82168103        | +0.1254625 |
| +0.1940573 | 455.28641144   | 4  | D   | 8  | 1091.552021614 | -0.1333204 | 1091.552021614      |            |
| -0.1034563 | 641.365724393  | 5  | W   | 7  | 976.525078582  | -0.0621269 | 976.525078582       |            |
| -0.1696119 | 740.43413831   | 6  | V   | 6  | 790.445765628  | -0.1354019 | 395.726521047       | -0.3372999 |
|            | 837.486902162  | 7  | P   | 5  | 691.377351712  | +0.0218792 | 691.377351712       |            |
| -0.2221667 | 1000.5502307   | 8  | Y   | 4  | 594.32458786   | -0.2600737 | 594.32458786        |            |
| +0.069929  | 1113.63429468  | 9  | I   | 3  | 431.261259322  | -0.0998824 | 431.261259322       |            |
| -0.3223637 | 1227.677222127 | 10 | N   | 2  | 318.177195341  | +0.1023457 | 318.177195341       |            |
|            | 1284.698685851 | 11 | G   | 1  | 204.134267894  |            | 204.134267894       |            |
|            |                | 12 | K   | 0  | 147.112804171  |            | 147.112804171       |            |

Scan number 7952 Raw file 20091018\_Orbi6\_MaHe\_SA\_ADH\_exp3\_24h\_Gel01  
 Method ITMS; CID Genenames LRAT

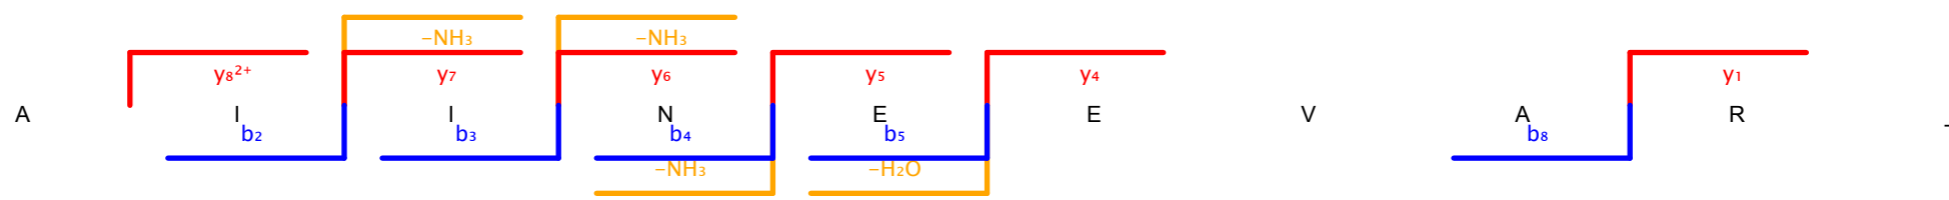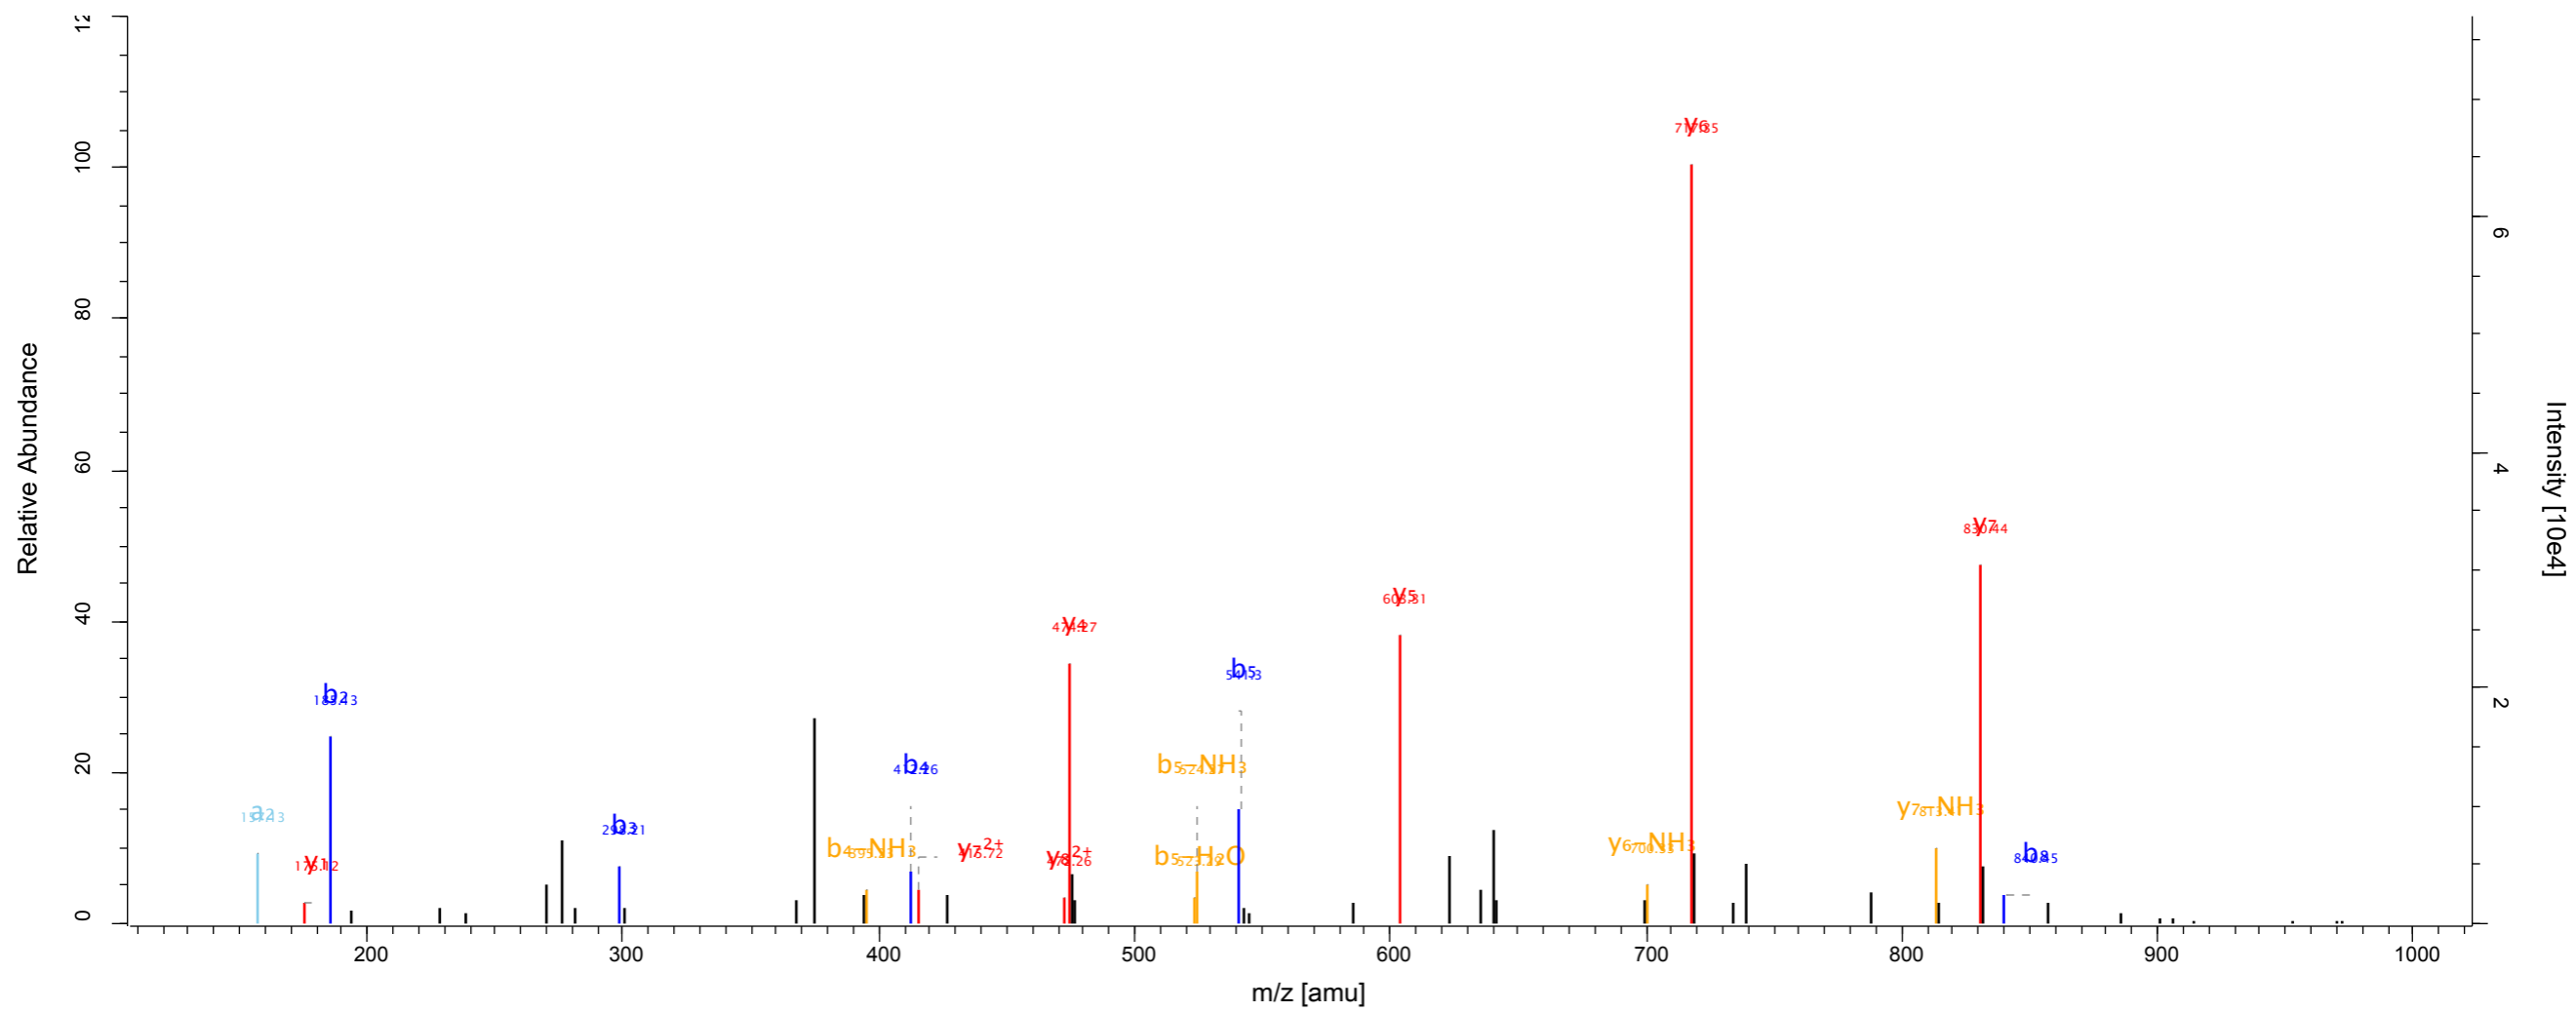

precursor information

|                       |                  |
|-----------------------|------------------|
| Mass:                 | 1012.55001       |
| m/z:                  | 507.78272        |
| Charge:               | 2+               |
| Retention time:       | 52.8176116043250 |
| Score:                | 152.6302         |
| Mass Error (ppm):     | 0.24186          |
| gPED:                 | 0.00018742       |
| Annotation:           | 7 of 0           |
| AminoAcids Coverage:  | 78 %             |
| Intensity Coverage:   | 68 %             |
| Peak Coverage:        | 24 %             |
| Protein Localisation: | 135 ... 143      |

| a ion      |              | b ion      |              |   |     |   | y ion        |            | y <sup>2+</sup> ion |            |
|------------|--------------|------------|--------------|---|-----|---|--------------|------------|---------------------|------------|
| Δ dalton   | mass         | Δ dalton   | mass         |   | seq |   | Δ dalton     | mass       | Δ dalton            | mass       |
|            | 44.049475632 |            | 72.044390254 | 1 | A   | 8 |              |            |                     |            |
| +0.0642753 | 157.13353961 | -0.0106259 | 185.12845423 | 2 | I   | 7 | 943.52072149 |            | 472.26399898        | +0.1063013 |
|            | 270.21760359 | -0.1077514 | 298.21251822 | 3 | I   | 6 | 830.4366575  | -0.036511  | 415.72196699        | +0.0014522 |
|            | 384.26053104 | +0.008745  | 412.25544566 | 4 | N   | 5 | 717.35259352 | -0.0341731 | 717.35259352        |            |
|            | 513.30312414 | -0.1264689 | 541.29803876 | 5 | E   | 4 | 603.30966608 | +0.0912128 | 603.30966608        |            |
|            | 642.34571723 |            | 670.34063185 | 6 | E   | 3 | 474.26707298 | +0.0345322 | 474.26707298        |            |
|            | 741.41413115 |            | 769.40904577 | 7 | V   | 2 | 345.22447988 |            | 345.22447988        |            |
|            | 812.45124494 | -0.33239   | 840.44615956 | 8 | A   | 1 | 246.15606597 |            | 246.15606597        |            |
|            |              |            |              | 9 | R   | 0 | 175.11895218 | +0.1659904 | 175.11895218        |            |

Scan number 18332 Raw file 20091018\_Orbi6\_MaHe\_SA\_ADH\_exp3\_24h\_Gel03  
 Method ITMS; CID Genenames PRADC1

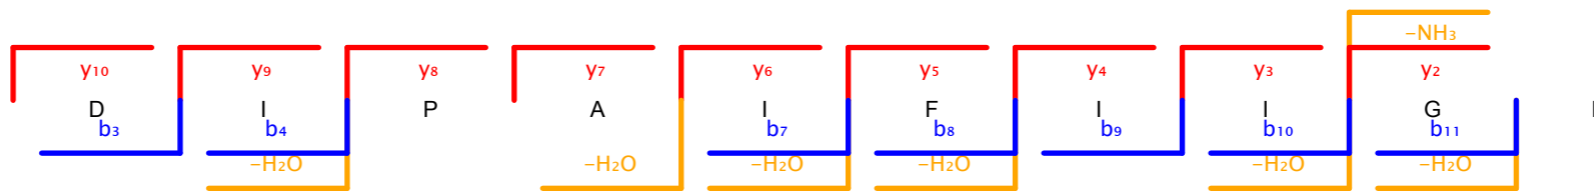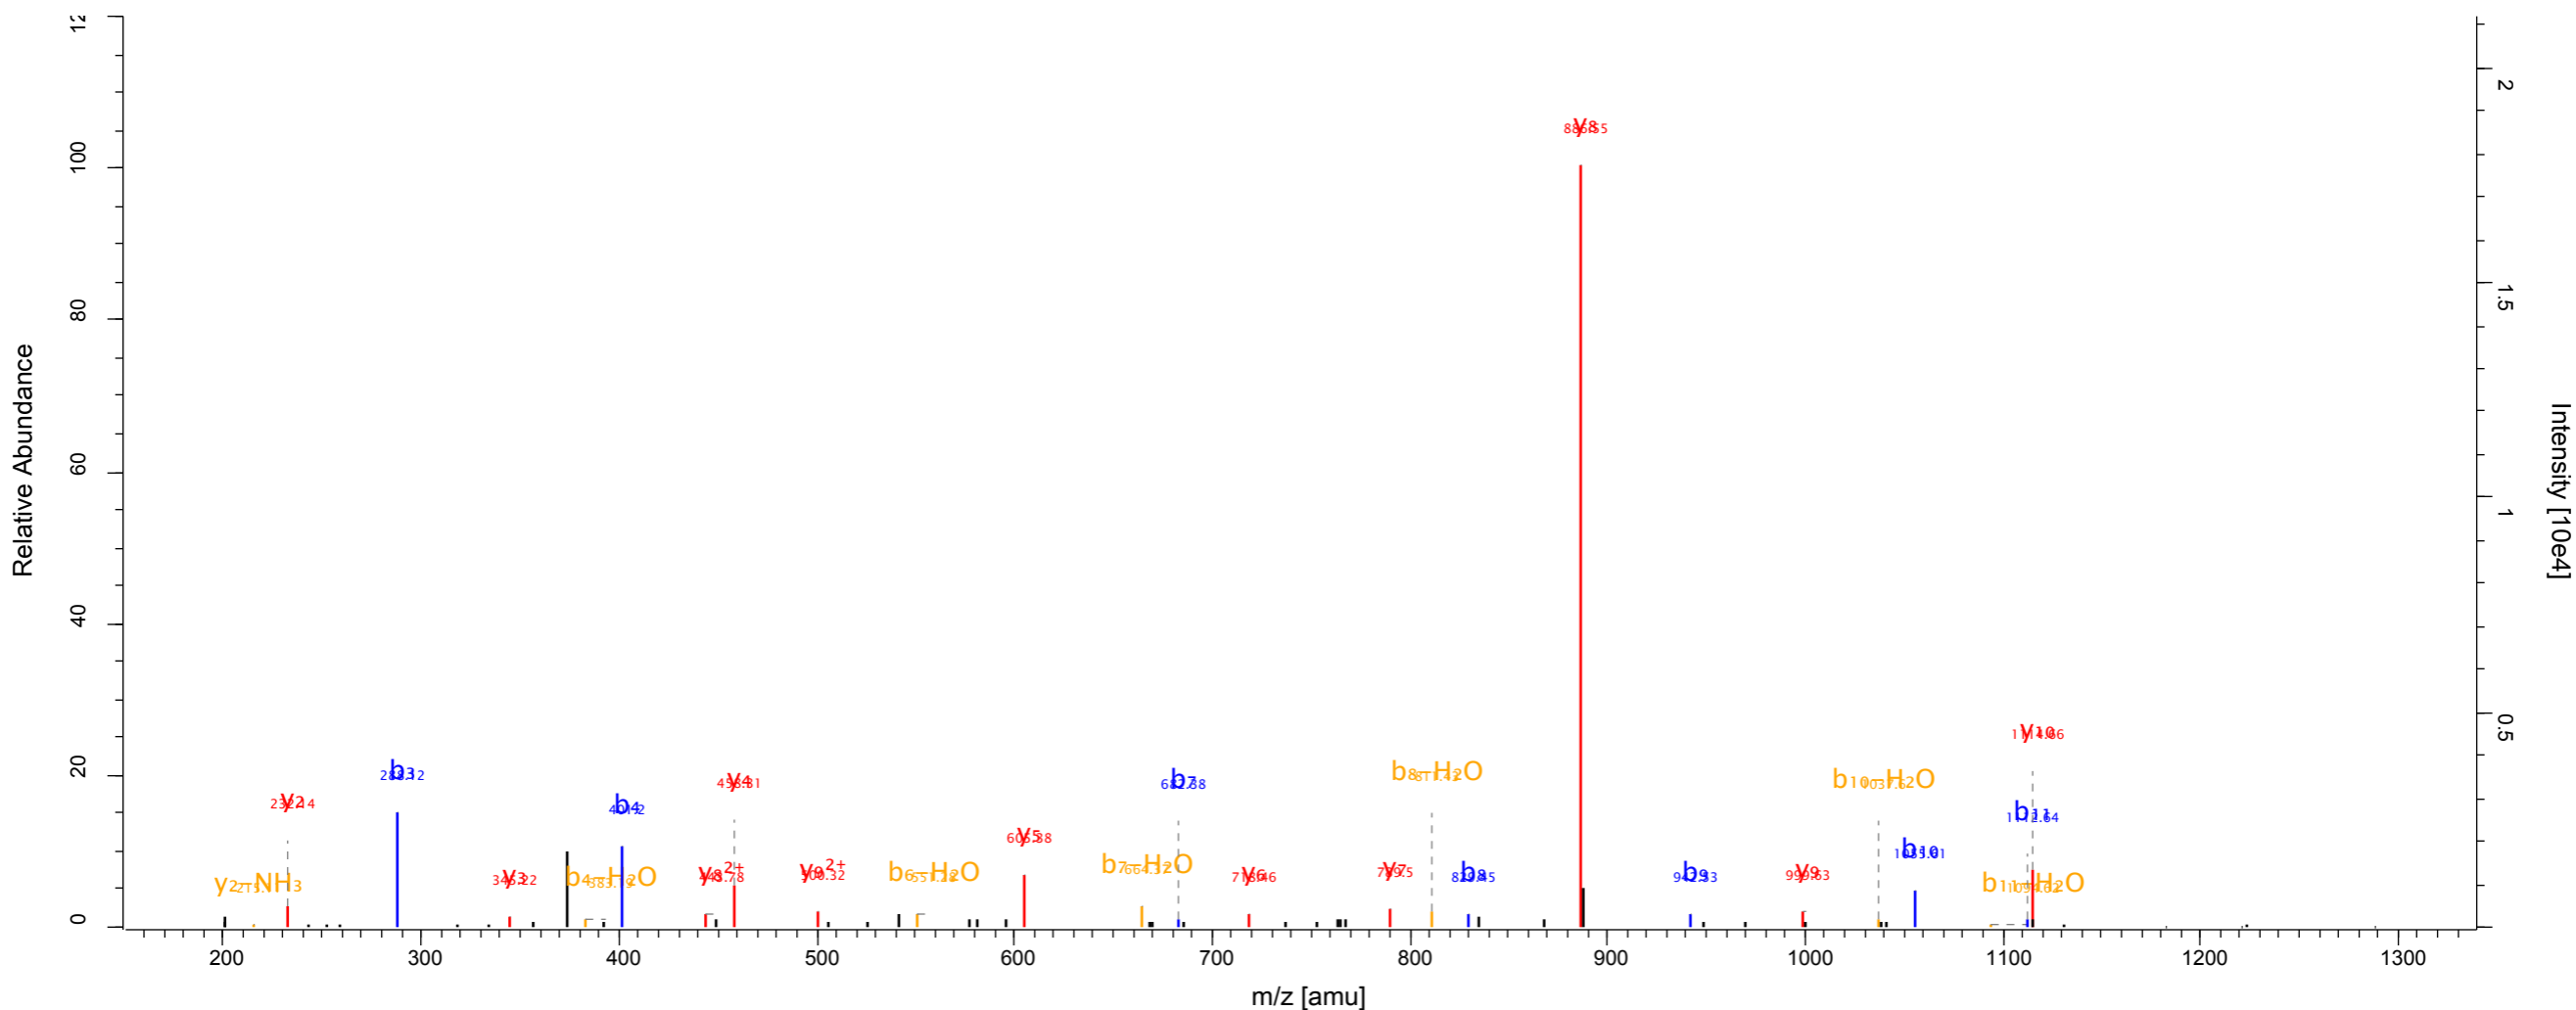

precursor information

|                   |                 |
|-------------------|-----------------|
| Mass:             | 1285.72082      |
| m/z:              | 642.87710       |
| Charge:           | 2+              |
| Retentiontime:    | 107.88053804043 |
| Score:            | 185.7602        |
| Mass Error [ppm]: | 0.32048         |
| PEP:              | 2.0160E-08      |
| Precursor Type:   | MULTI           |

general information

|                       |             |
|-----------------------|-------------|
| Annotation:           | 0 of 12     |
| AminoAcids Coverage:  | 75 %        |
| Intensity Coverage:   | 81 %        |
| Peak Coverage:        | 20 %        |
| Protein Localisation: | 136 ... 147 |

| b ion      |                |    |     |    | y ion          |            | y <sup>2+</sup> ion |            |
|------------|----------------|----|-----|----|----------------|------------|---------------------|------------|
| Δ dalton   | mass           |    | seq |    | Δ dalton       | mass       | Δ dalton            | mass       |
|            | 102.054954941  | 1  | T   | 11 |                |            |                     |            |
|            | 173.092068728  | 2  | A   | 10 | 1185.699020202 |            | 1185.699020202      |            |
| +0.0186225 | 288.11901176   | 3  | D   | 9  | 1114.661906414 | -0.0362961 | 1114.661906414      |            |
| -0.1505855 | 401.203075741  | 4  | I   | 8  | 999.634963382  | -0.132522  | 500.321119924       | +0.0162824 |
|            | 498.255839593  | 5  | P   | 7  | 886.550899402  | -0.0823935 | 443.779087934       | +0.0187636 |
|            | 569.292953381  | 6  | A   | 6  | 789.49813555   | -0.049344  | 789.49813555        |            |
| +0.0869719 | 682.377017361  | 7  | I   | 5  | 718.461021762  | +0.0395276 | 718.461021762       |            |
| -0.2184415 | 829.445431277  | 8  | F   | 4  | 605.376957782  | -0.0133714 | 605.376957782       |            |
| -0.0570831 | 942.529495258  | 9  | I   | 3  | 458.308543865  | +0.0632823 | 458.308543865       |            |
| -0.3452487 | 1055.613559238 | 10 | I   | 2  | 345.224479885  | +0.0737379 | 345.224479885       |            |
| -0.2998179 | 1112.635022962 | 11 | G   | 1  | 232.140415905  | -0.0096176 | 232.140415905       |            |
|            |                | 12 | R   | 0  | 175.118952181  |            | 175.118952181       |            |

Scan number 16511 Raw file 20091018\_Orbi6\_MaHe\_SA\_ADH\_exp3\_24h\_Gel04  
 Method ITMS; CID Genenames DGCR6;DGCR6L

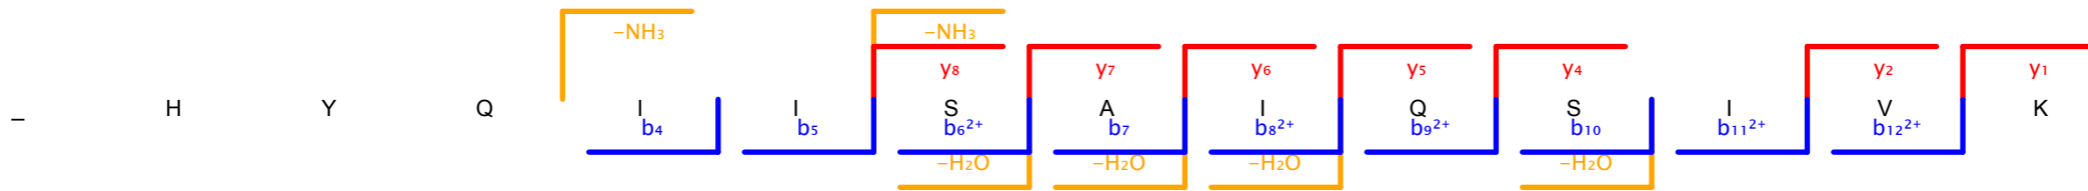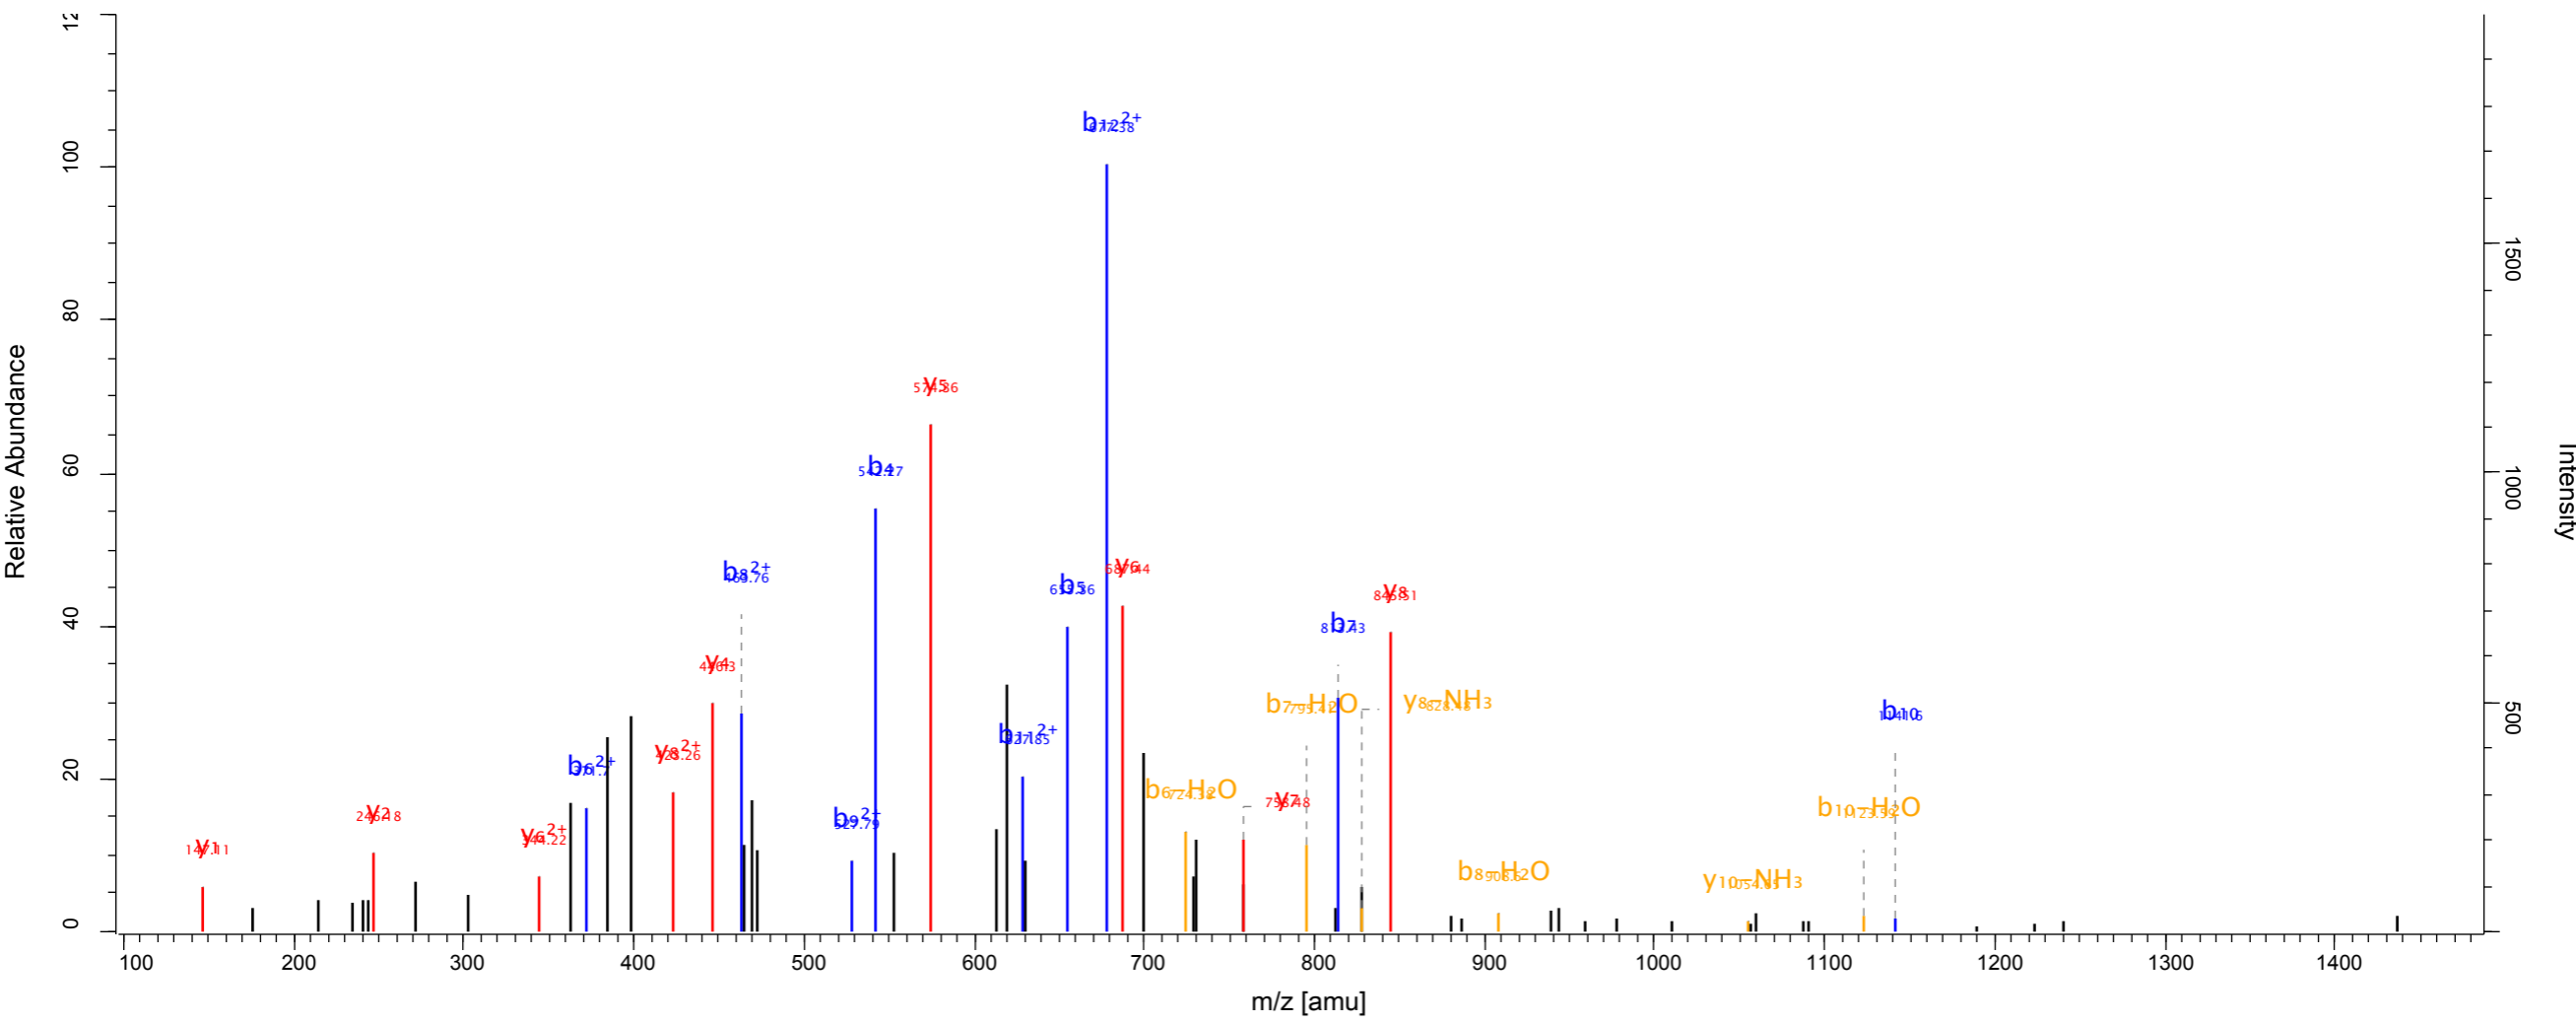

precursor information

|                   |                  |
|-------------------|------------------|
| Mass:             | 1408.85075       |
| m/z:              | 500.62419        |
| Charge:           | 2+               |
| Retention time:   | 02.8242103027344 |
| Score:            | 142.0848         |
| Mass Error (ppm): | -0.0073028       |
| PEP:              | 1.1462E-05       |
| Precursor Type:   | MULTI            |

general information

|                       |           |
|-----------------------|-----------|
| Annotation:           | 10 of 12  |
| AminoAcids Coverage:  | 77 %      |
| Intensity Coverage:   | 66 %      |
| Peak Coverage:        | 20 %      |
| Protein Localisation: | 21 ... 33 |

| b <sup>2+</sup> ion |              | b ion      |              |    |     |    | y ion        |            | y <sup>2+</sup> ion |            |
|---------------------|--------------|------------|--------------|----|-----|----|--------------|------------|---------------------|------------|
| Δ dalton            | mass         | Δ dalton   | mass         |    | seq |    | Δ dalton     | mass       | Δ dalton            | mass       |
|                     | 138.06618833 |            | 138.06618833 | 1  | H   | 12 |              |            |                     |            |
|                     | 301.12951687 |            | 301.12951687 | 2  | Y   | 11 | 1362.7991282 |            | 1362.7991282        |            |
|                     | 429.18809438 |            | 429.18809438 | 3  | Q   | 10 | 1199.7357996 |            | 1199.7357996        |            |
|                     | 542.27215836 | -0.1774928 | 542.27215836 | 4  | I   | 9  | 1071.6772221 |            | 1071.6772221        |            |
|                     | 655.35622234 | +0.1410921 | 655.35622234 | 5  | I   | 8  | 958.59315815 |            | 958.59315815        |            |
| -0.0466406          | 371.69776361 |            | 742.38825075 | 6  | S   | 7  | 845.50909417 | -0.040039  | 423.25818532        | +0.0961543 |
|                     | 813.42536454 | -0.1213484 | 813.42536454 | 7  | A   | 6  | 758.47706576 | +0.0518039 | 758.47706576        |            |
| -0.1758635          | 463.75835249 |            | 926.50942852 | 8  | I   | 5  | 687.43995197 | -0.0283919 | 344.22361422        | +0.167377  |
| +0.2424491          | 527.78764125 |            | 1054.568006  | 9  | Q   | 4  | 574.35588799 | -0.013969  | 574.35588799        |            |
|                     | 1141.6000344 | -0.1212747 | 1141.6000344 | 10 | S   | 3  | 446.29731048 | +0.0285867 | 446.29731048        |            |
| -0.035873           | 627.84568744 |            | 1254.6840984 | 11 | I   | 2  | 359.26528207 |            | 359.26528207        |            |
| -0.0672723          | 677.3798944  |            | 1353.7525123 | 12 | V   | 1  | 246.18121809 | +0.0080367 | 246.18121809        |            |
|                     |              |            |              | 13 | K   | 0  | 147.11280417 | -0.1236989 | 147.11280417        |            |



Scan number 5541 Raw file 20091019\_Orbi6\_MaHe\_SA\_ADH\_exp3\_12h\_Gel01  
 Method ITMS; CID Genenames PFN3

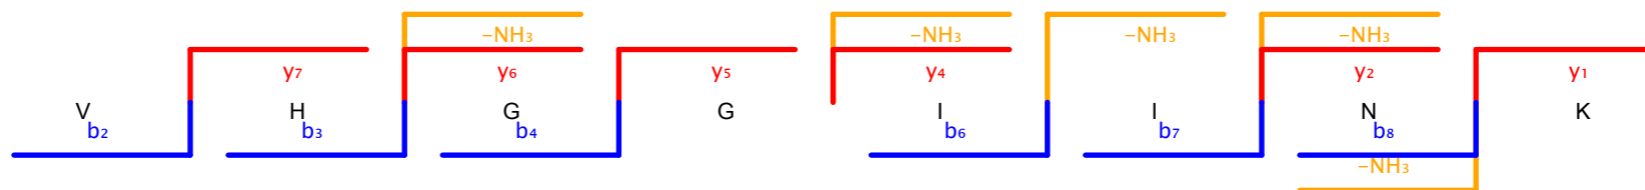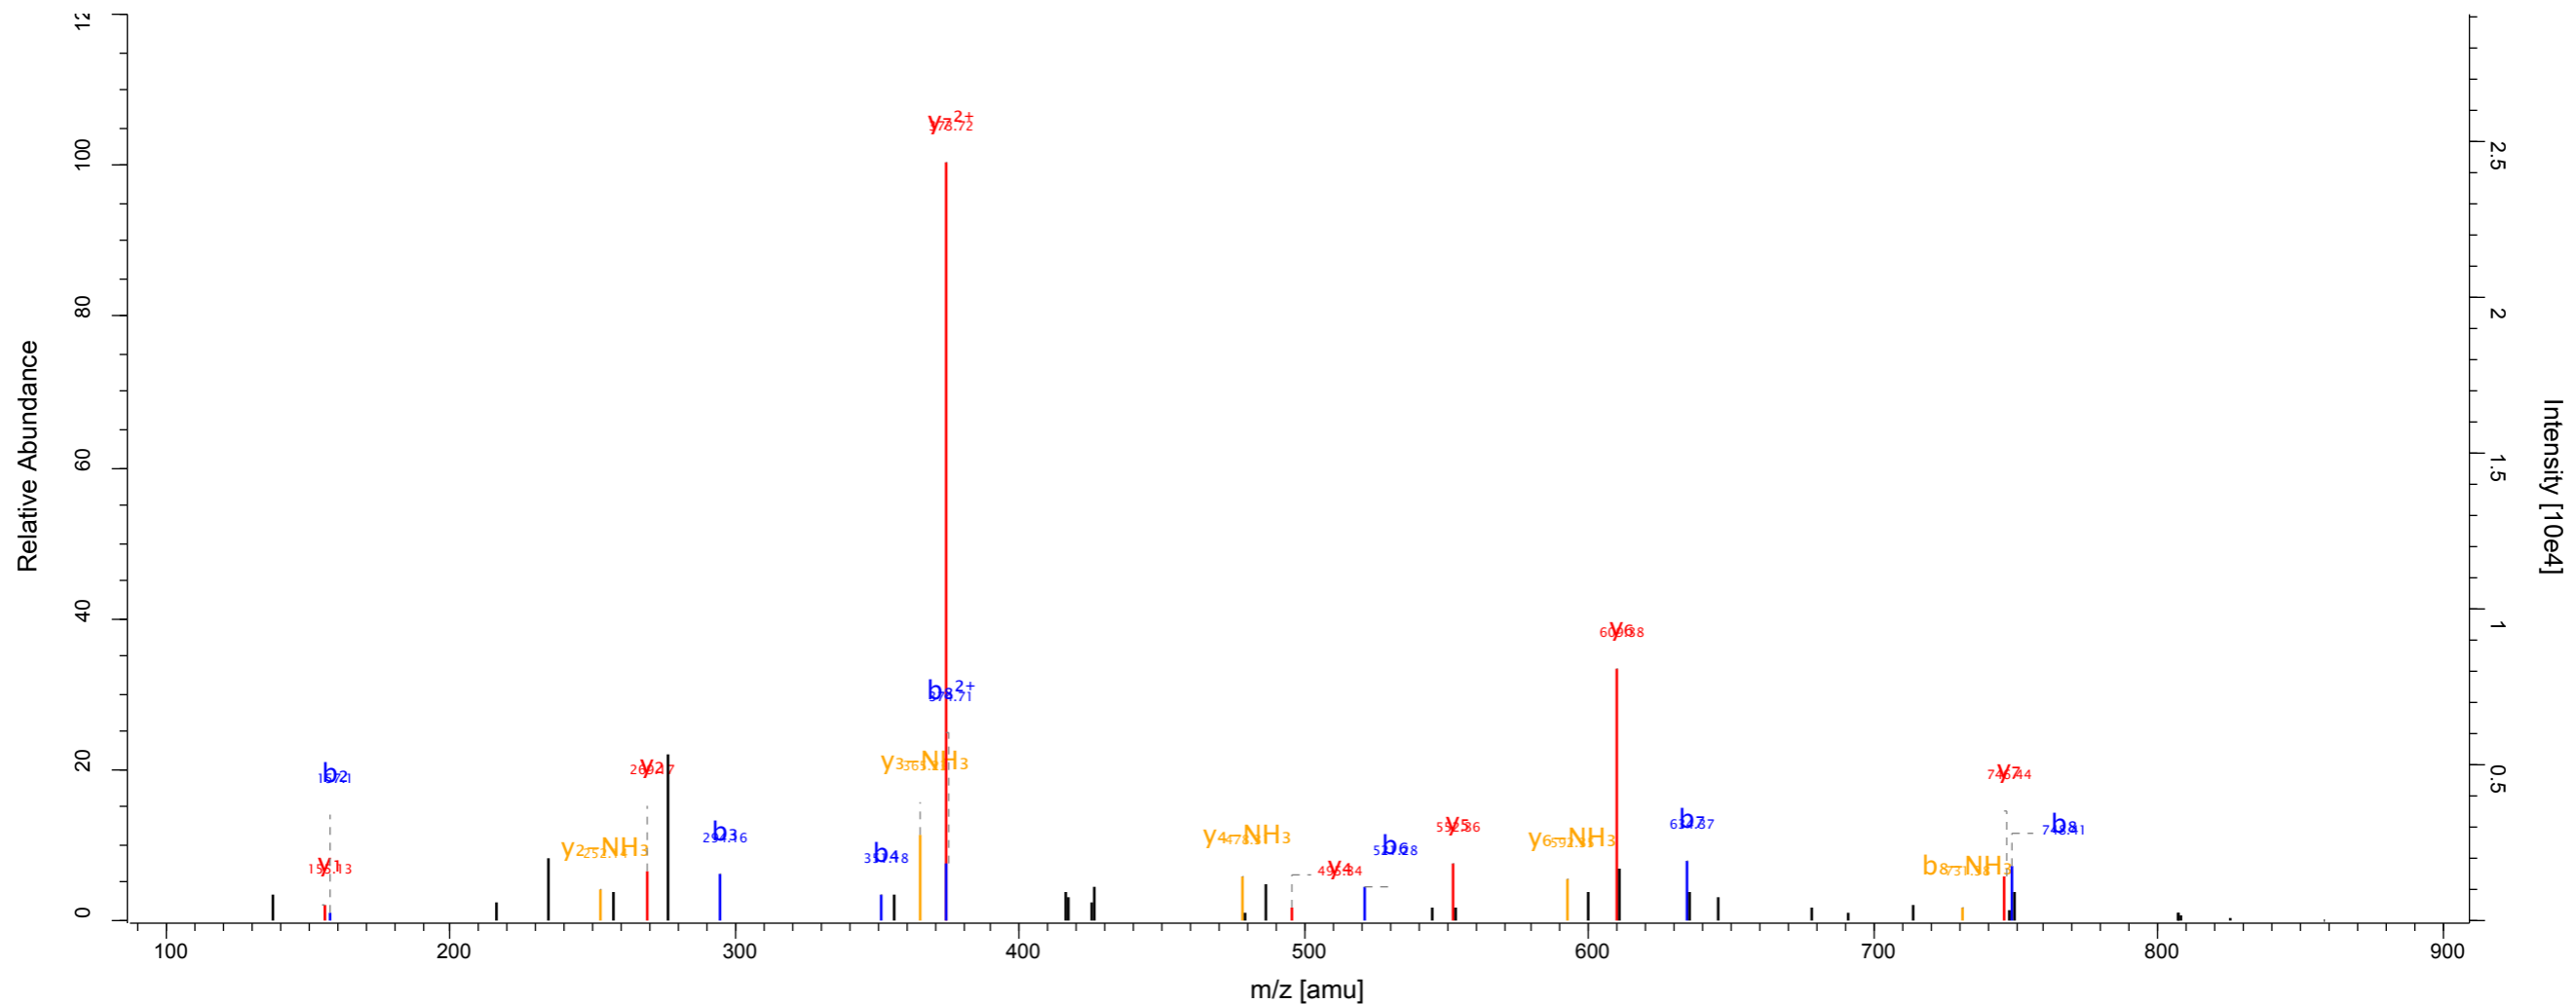

precursor information

|                       |                  |
|-----------------------|------------------|
| Mass:                 | 802.50867        |
| m/z:                  | 447.76161        |
| Charge:               | 2+               |
| Retention time:       | 16.1520006058008 |
| Score:                | 161.1116         |
| Mass Error (ppm):     | 0.40655          |
| gPDP:                 | 0.00018108       |
| Annotation:           | 8 of 0           |
| AminoAcids Coverage:  | 80 %             |
| Intensity Coverage:   | 70 %             |
| Peak Coverage:        | 40 %             |
| Protein Localisation: | 115 ... 123      |

| b <sup>2+</sup> ion |              | b ion      |              |   |     |   | y ion        |            | y <sup>2+</sup> ion |            |
|---------------------|--------------|------------|--------------|---|-----|---|--------------|------------|---------------------|------------|
| Δ dalton            | mass         | Δ dalton   | mass         |   | seq |   | Δ dalton     | mass       | Δ dalton            | mass       |
|                     | 58.02874019  |            | 58.02874019  | 1 | G   | 8 |              |            |                     |            |
|                     | 157.09715411 | +0.1654649 | 157.09715411 | 2 | V   | 7 | 845.50831162 |            | 845.50831162        |            |
|                     | 294.15606597 | -0.0549307 | 294.15606597 | 3 | H   | 6 | 746.4398977  | -0.1829397 | 373.72358708        | -0.1126862 |
|                     | 351.17752969 | +0.0652071 | 351.17752969 | 4 | G   | 5 | 609.38098584 | -0.0742231 | 609.38098584        |            |
|                     | 408.19899342 |            | 408.19899342 | 5 | G   | 4 | 552.35952212 | -0.1734259 | 552.35952212        |            |
|                     | 521.2830574  | +0.0587395 | 521.2830574  | 6 | I   | 3 | 495.33805839 | +0.2683259 | 495.33805839        |            |
|                     | 634.36712138 | -0.0936839 | 634.36712138 | 7 | I   | 2 | 382.25399441 |            | 382.25399441        |            |
| -0.4430376          | 374.70866265 | +0.0631567 | 748.41004882 | 8 | N   | 1 | 269.16993043 | -0.0103235 | 269.16993043        |            |
|                     |              |            |              | 9 | K   | 0 | 155.12700298 | +0.145458  | 155.12700298        |            |

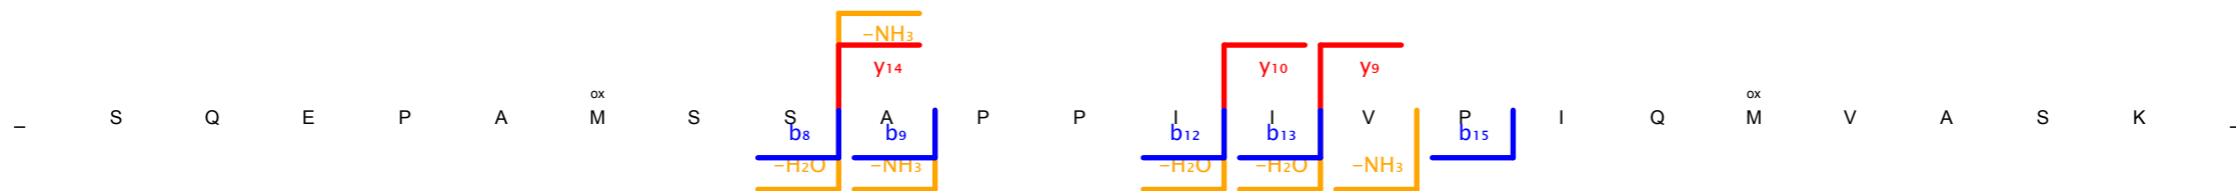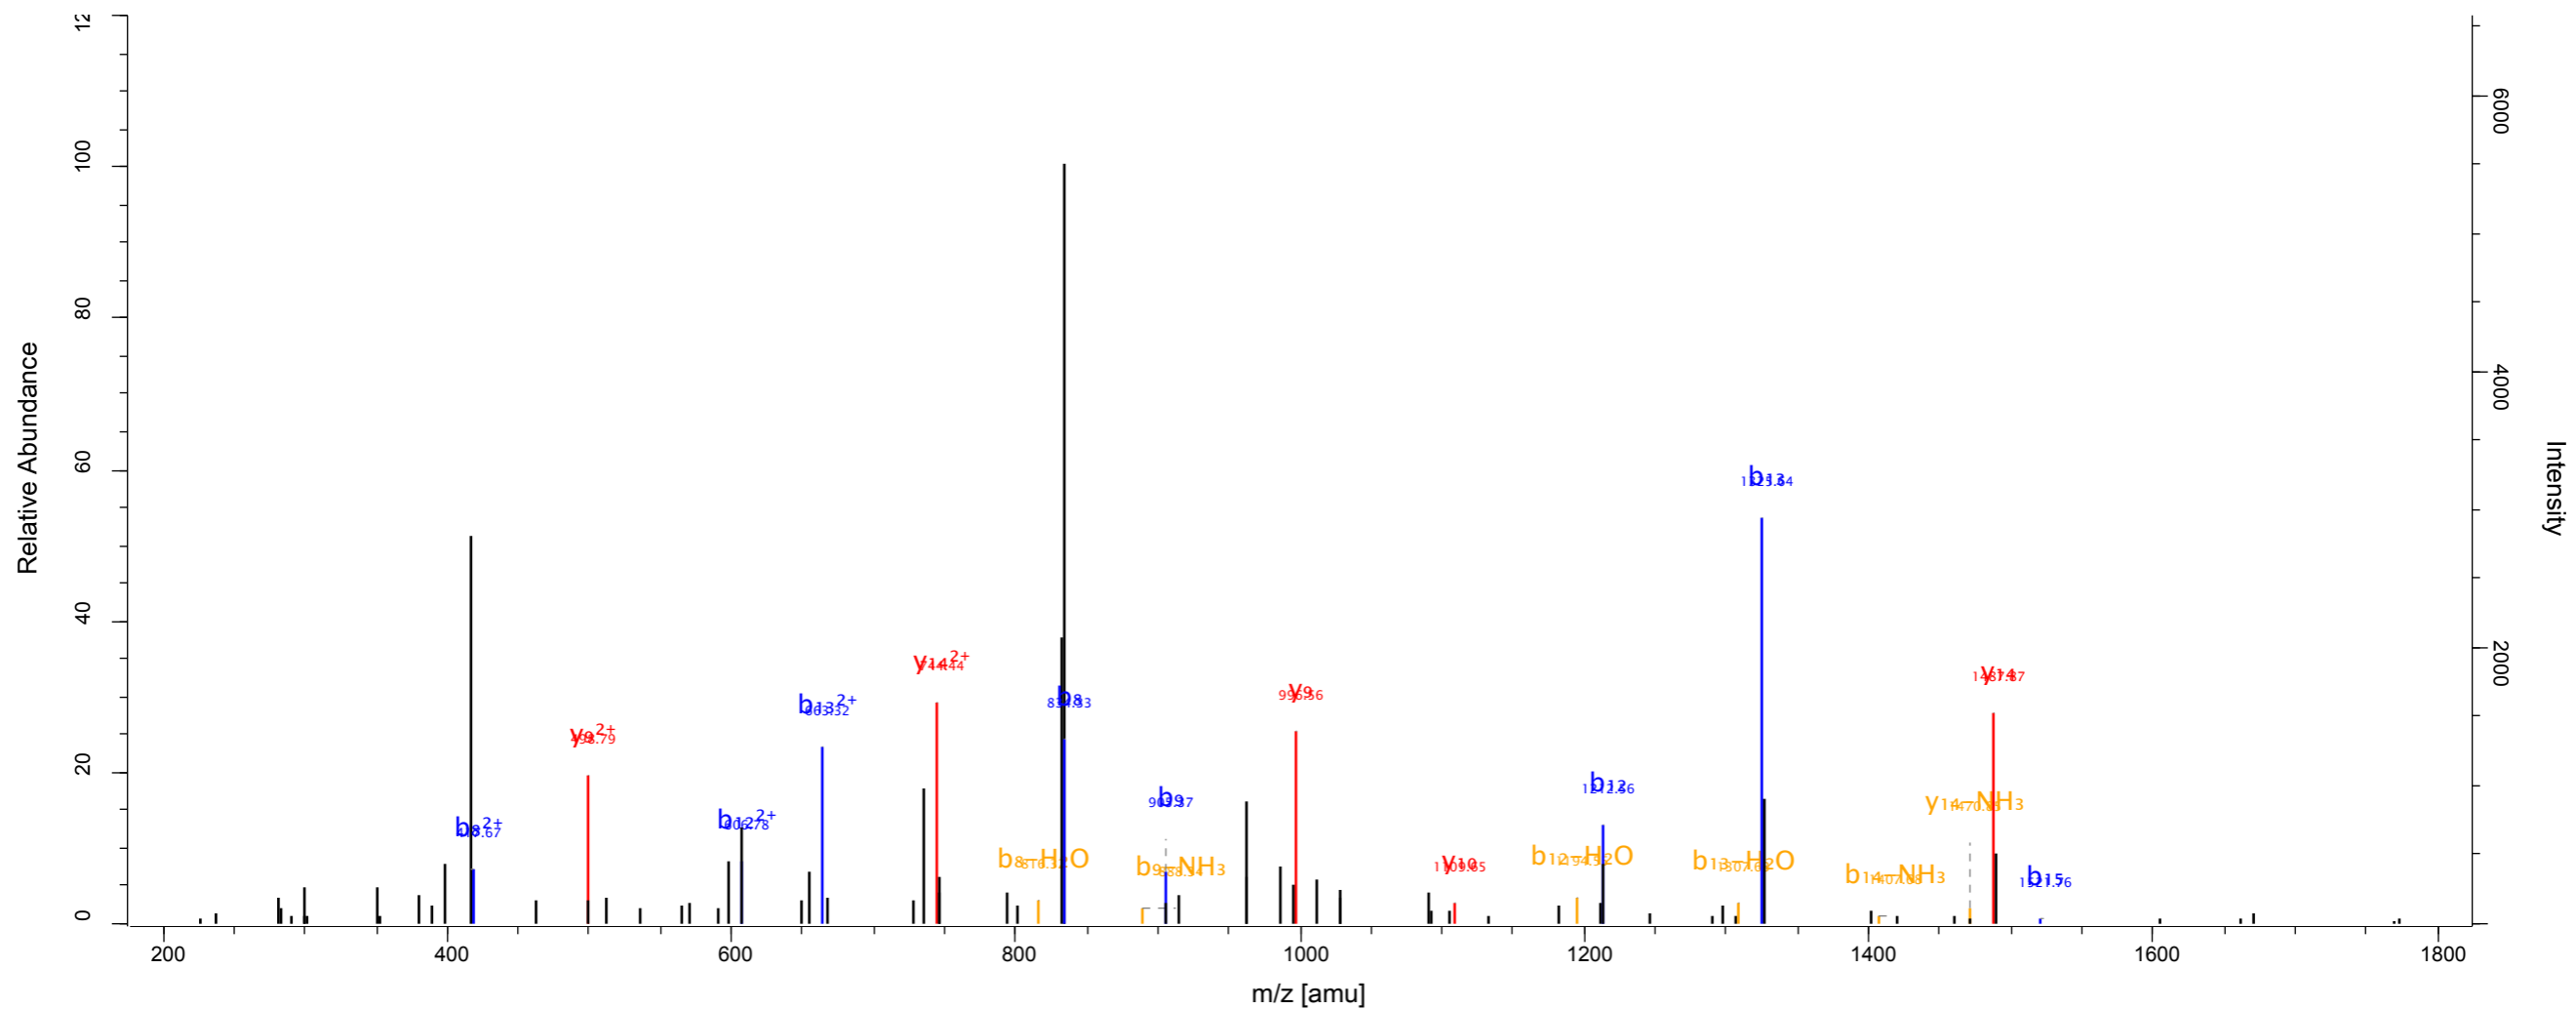

precursor information

|                   |                  |
|-------------------|------------------|
| Mass:             | 2212.17221       |
| m/z:              | 771.72168        |
| Charge:           | 2+               |
| Retention time:   | 1.22701240520551 |
| Score:            | 81.72207         |
| Mass Error (ppm): | 1.0200           |
| DEP:              | 2.4188E-05       |
| Precursor Type:   | MULTI            |

| b <sup>2+</sup> ion |              | b ion      |              |    |     |    | y ion        |            | y <sup>2+</sup> ion |            |
|---------------------|--------------|------------|--------------|----|-----|----|--------------|------------|---------------------|------------|
| Δ dalton            | mass         | Δ dalton   | mass         |    | seq |    | Δ dalton     | mass       | Δ dalton            | mass       |
|                     | 88.039304876 |            | 88.039304876 | 1  | S   | 21 |              |            |                     |            |
|                     | 216.09788239 |            | 216.09788239 | 2  | Q   | 20 | 2234.1650513 |            | 2234.1650513        |            |
|                     | 345.14047548 |            | 345.14047548 | 3  | E   | 19 | 2106.1064738 |            | 2106.1064738        |            |
|                     | 442.19323934 |            | 442.19323934 | 4  | P   | 18 | 1977.0638807 |            | 1977.0638807        |            |
|                     | 513.23035312 |            | 513.23035312 | 5  | A   | 17 | 1880.0111169 |            | 1880.0111169        |            |
|                     | 660.26575235 |            | 660.26575235 | 6  | M   | 16 | 1808.9740031 |            | 1808.9740031        |            |
|                     | 747.29778076 |            | 747.29778076 | 7  | S   | 15 | 1661.9386039 |            | 1661.9386039        |            |
| +0.0837155          | 417.66854282 | +0.1028691 | 834.32980917 | 8  | S   | 14 | 1574.9065754 |            | 1574.9065754        |            |
|                     | 905.36692296 | -0.0729776 | 905.36692296 | 9  | A   | 13 | 1487.874547  | +0.4307508 | 744.44091175        | +0.2868104 |
|                     | 1002.4196868 |            | 1002.4196868 | 10 | P   | 12 | 1416.8374333 |            | 1416.8374333        |            |
|                     | 1099.4724507 |            | 1099.4724507 | 11 | P   | 11 | 1319.7846694 |            | 1319.7846694        |            |
| -0.1277818          | 606.78189556 | -0.0667686 | 1212.5565146 | 12 | I   | 10 | 1222.7319055 |            | 1222.7319055        |            |
| +0.168321           | 663.32392755 | -0.3621362 | 1325.6405786 | 13 | I   | 9  | 1109.6478416 | -0.0206443 | 1109.6478416        |            |
|                     | 1424.7089925 |            | 1424.7089925 | 14 | V   | 8  | 996.56377759 | -0.0908772 | 498.78552703        | -0.1235397 |
|                     | 1521.7617564 | -0.1769175 | 1521.7617564 | 15 | P   | 7  | 897.49536367 |            | 897.49536367        |            |
|                     | 1634.8458204 |            | 1634.8458204 | 16 | I   | 6  | 800.44259982 |            | 800.44259982        |            |
|                     | 1762.9043979 |            | 1762.9043979 | 17 | Q   | 5  | 687.35853584 |            | 687.35853584        |            |
|                     | 1909.9397971 |            | 1909.9397971 | 18 | M   | 4  | 559.29995833 |            | 559.29995833        |            |
|                     | 2009.008211  |            | 2009.008211  | 19 | V   | 3  | 412.2645591  |            | 412.2645591         |            |
|                     | 2080.0453248 |            | 2080.0453248 | 20 | A   | 2  | 313.19614518 |            | 313.19614518        |            |
|                     | 2167.0773532 |            | 2167.0773532 | 21 | S   | 1  | 242.15903139 |            | 242.15903139        |            |
|                     |              |            |              | 22 | K   | 0  | 155.12700298 |            | 155.12700298        |            |

general information

|                       |             |
|-----------------------|-------------|
| Annotation:           | 7 of 22     |
| AminoAcids Coverage:  | 22%         |
| Intensity Coverage:   | 27%         |
| Peak Coverage:        | 22%         |
| Protein Localisation: | 138 ... 159 |

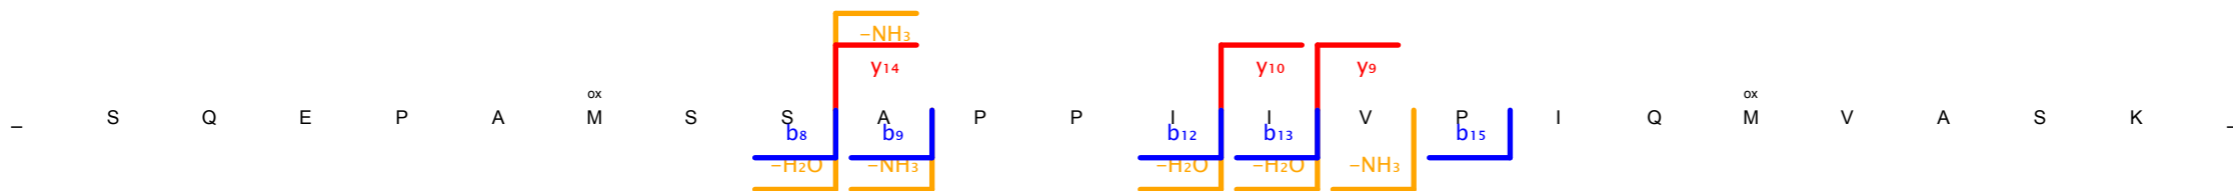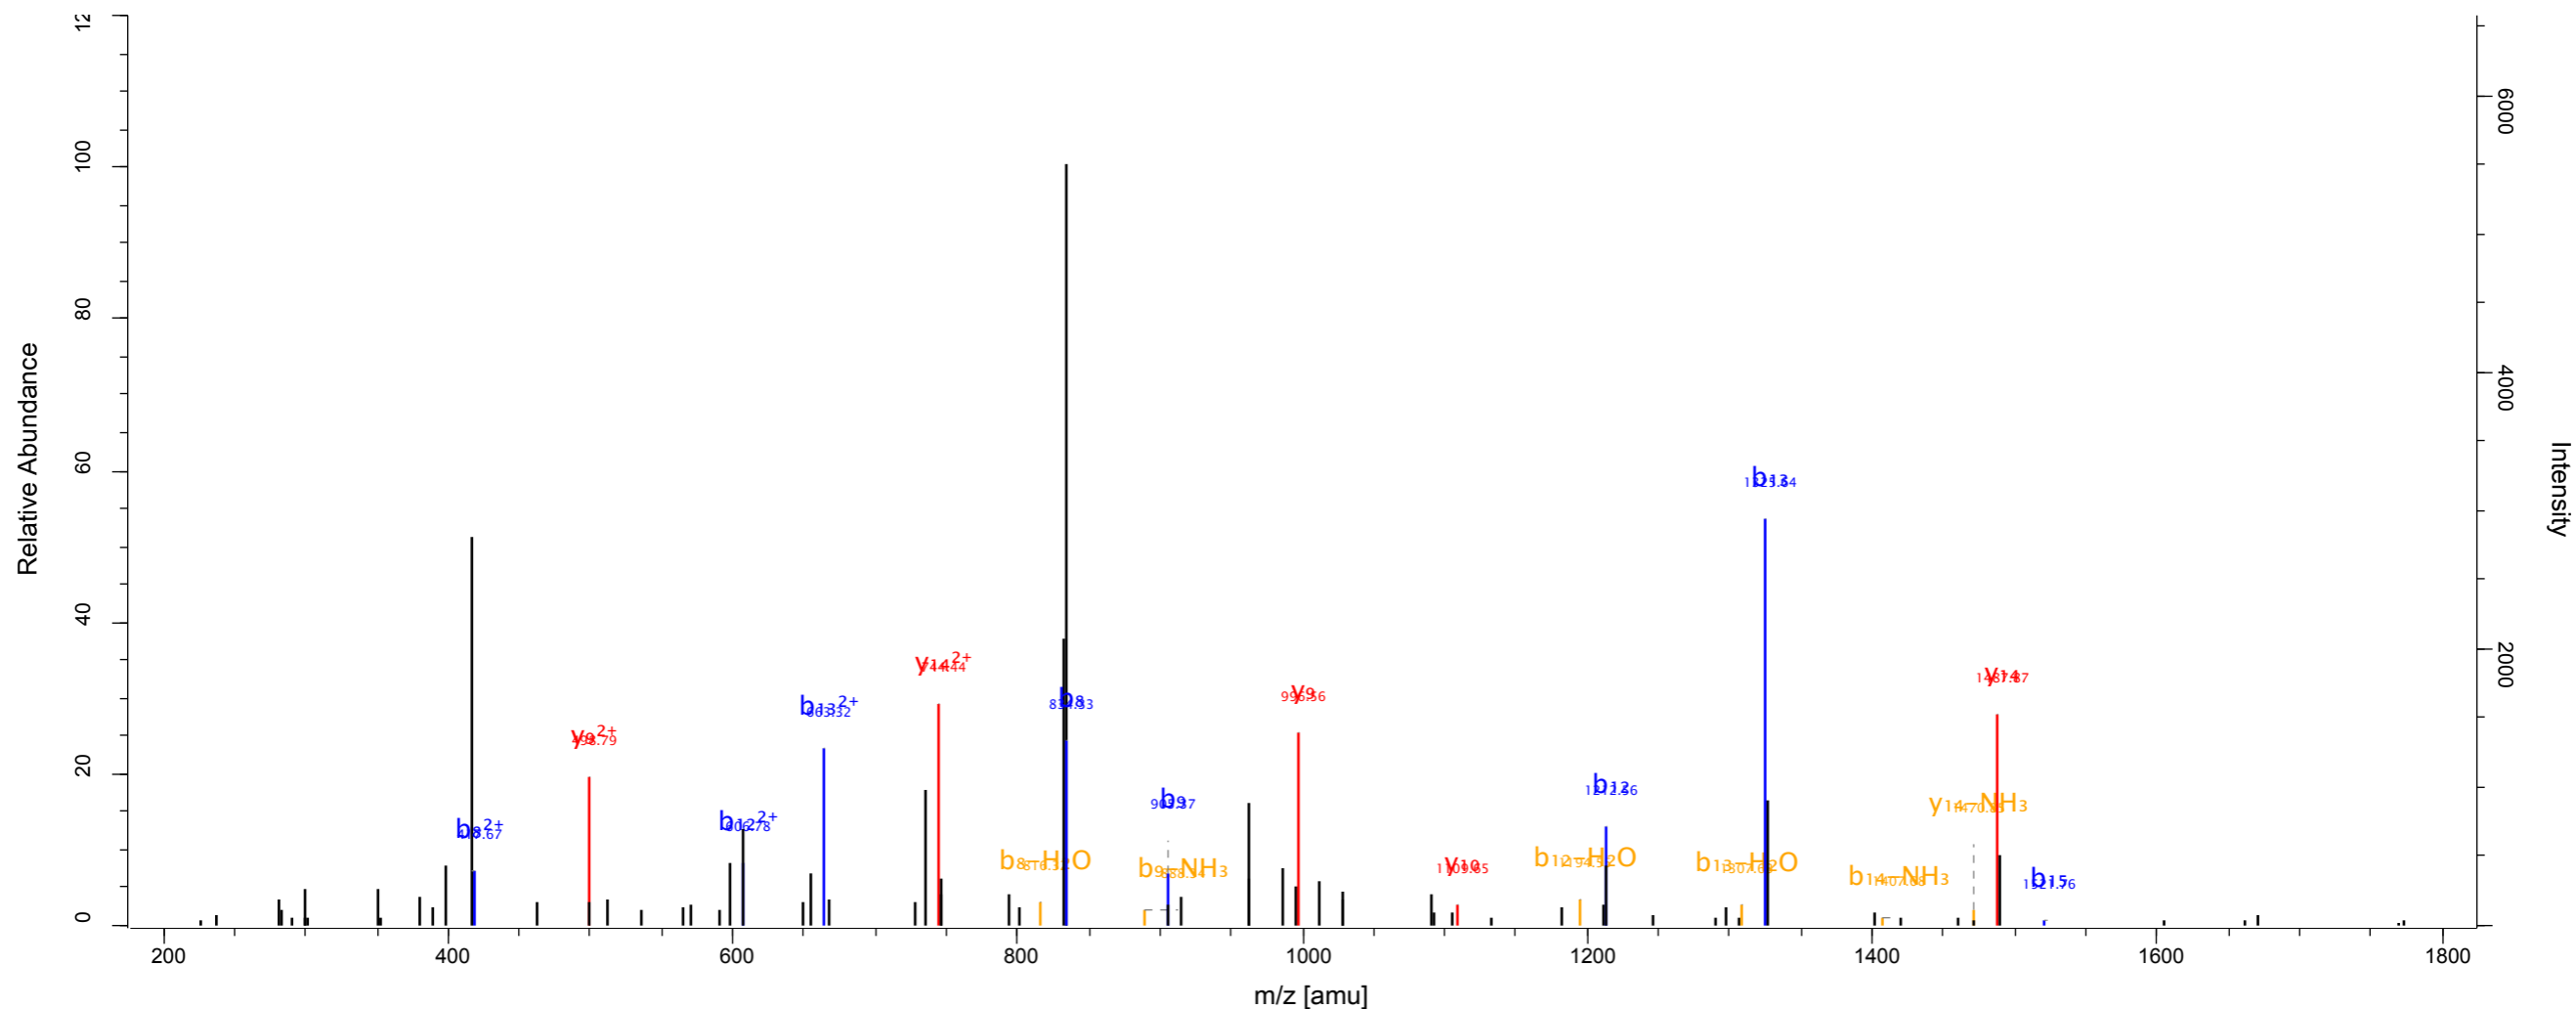

precursor information

|                   |                   |
|-------------------|-------------------|
| Mass:             | 2212.17221        |
| m/z:              | 771.72168         |
| Charge:           | 2+                |
| Retention time:   | 1.22.701240520551 |
| Score:            | 81.72207          |
| Mass Error (ppm): | 1.0200            |
| DEP:              | 2.4188E-05        |
| Precursor Type:   | MULTI             |

| b <sup>2+</sup> ion |              | b ion      |              |    |     |    | y ion        |            | y <sup>2+</sup> ion |            |
|---------------------|--------------|------------|--------------|----|-----|----|--------------|------------|---------------------|------------|
| Δ dalton            | mass         | Δ dalton   | mass         |    | seq |    | Δ dalton     | mass       | Δ dalton            | mass       |
|                     | 88.039304876 |            | 88.039304876 | 1  | S   | 21 |              |            |                     |            |
|                     | 216.09788239 |            | 216.09788239 | 2  | Q   | 20 | 2234.1650513 |            | 2234.1650513        |            |
|                     | 345.14047548 |            | 345.14047548 | 3  | E   | 19 | 2106.1064738 |            | 2106.1064738        |            |
|                     | 442.19323934 |            | 442.19323934 | 4  | P   | 18 | 1977.0638807 |            | 1977.0638807        |            |
|                     | 513.23035312 |            | 513.23035312 | 5  | A   | 17 | 1880.0111169 |            | 1880.0111169        |            |
|                     | 660.26575235 |            | 660.26575235 | 6  | M   | 16 | 1808.9740031 |            | 1808.9740031        |            |
|                     | 747.29778076 |            | 747.29778076 | 7  | S   | 15 | 1661.9386039 |            | 1661.9386039        |            |
| +0.0837155          | 417.66854282 | +0.1028691 | 834.32980917 | 8  | S   | 14 | 1574.9065754 |            | 1574.9065754        |            |
|                     | 905.36692296 | -0.0729776 | 905.36692296 | 9  | A   | 13 | 1487.874547  | +0.4307508 | 744.44091175        | +0.2868104 |
|                     | 1002.4196868 |            | 1002.4196868 | 10 | P   | 12 | 1416.8374333 |            | 1416.8374333        |            |
|                     | 1099.4724507 |            | 1099.4724507 | 11 | P   | 11 | 1319.7846694 |            | 1319.7846694        |            |
| -0.1277818          | 606.78189556 | -0.0667686 | 1212.5565146 | 12 | I   | 10 | 1222.7319055 |            | 1222.7319055        |            |
| +0.168321           | 663.32392755 | -0.3621362 | 1325.6405786 | 13 | I   | 9  | 1109.6478416 | -0.0206443 | 1109.6478416        |            |
|                     | 1424.7089925 |            | 1424.7089925 | 14 | V   | 8  | 996.56377759 | -0.0908772 | 498.78552703        | -0.1235397 |
|                     | 1521.7617564 | -0.1769175 | 1521.7617564 | 15 | P   | 7  | 897.49536367 |            | 897.49536367        |            |
|                     | 1634.8458204 |            | 1634.8458204 | 16 | I   | 6  | 800.44259982 |            | 800.44259982        |            |
|                     | 1762.9043979 |            | 1762.9043979 | 17 | Q   | 5  | 687.35853584 |            | 687.35853584        |            |
|                     | 1909.9397971 |            | 1909.9397971 | 18 | M   | 4  | 559.29995833 |            | 559.29995833        |            |
|                     | 2009.008211  |            | 2009.008211  | 19 | V   | 3  | 412.2645591  |            | 412.2645591         |            |
|                     | 2080.0453248 |            | 2080.0453248 | 20 | A   | 2  | 313.19614518 |            | 313.19614518        |            |
|                     | 2167.0773532 |            | 2167.0773532 | 21 | S   | 1  | 242.15903139 |            | 242.15903139        |            |
|                     |              |            |              | 22 | K   | 0  | 155.12700298 |            | 155.12700298        |            |

general information

|                       |             |
|-----------------------|-------------|
| Annotation:           | 7 of 22     |
| AminoAcids Coverage:  | 22%         |
| Intensity Coverage:   | 27%         |
| Peak Coverage:        | 22%         |
| Protein Localisation: | 138 ... 159 |

Scan number 19744 Raw file 20091019\_Orbi6\_MaHe\_SA\_ADH\_exp3\_12h\_Gel05  
 Method ITMS; CID Genenames LIN37

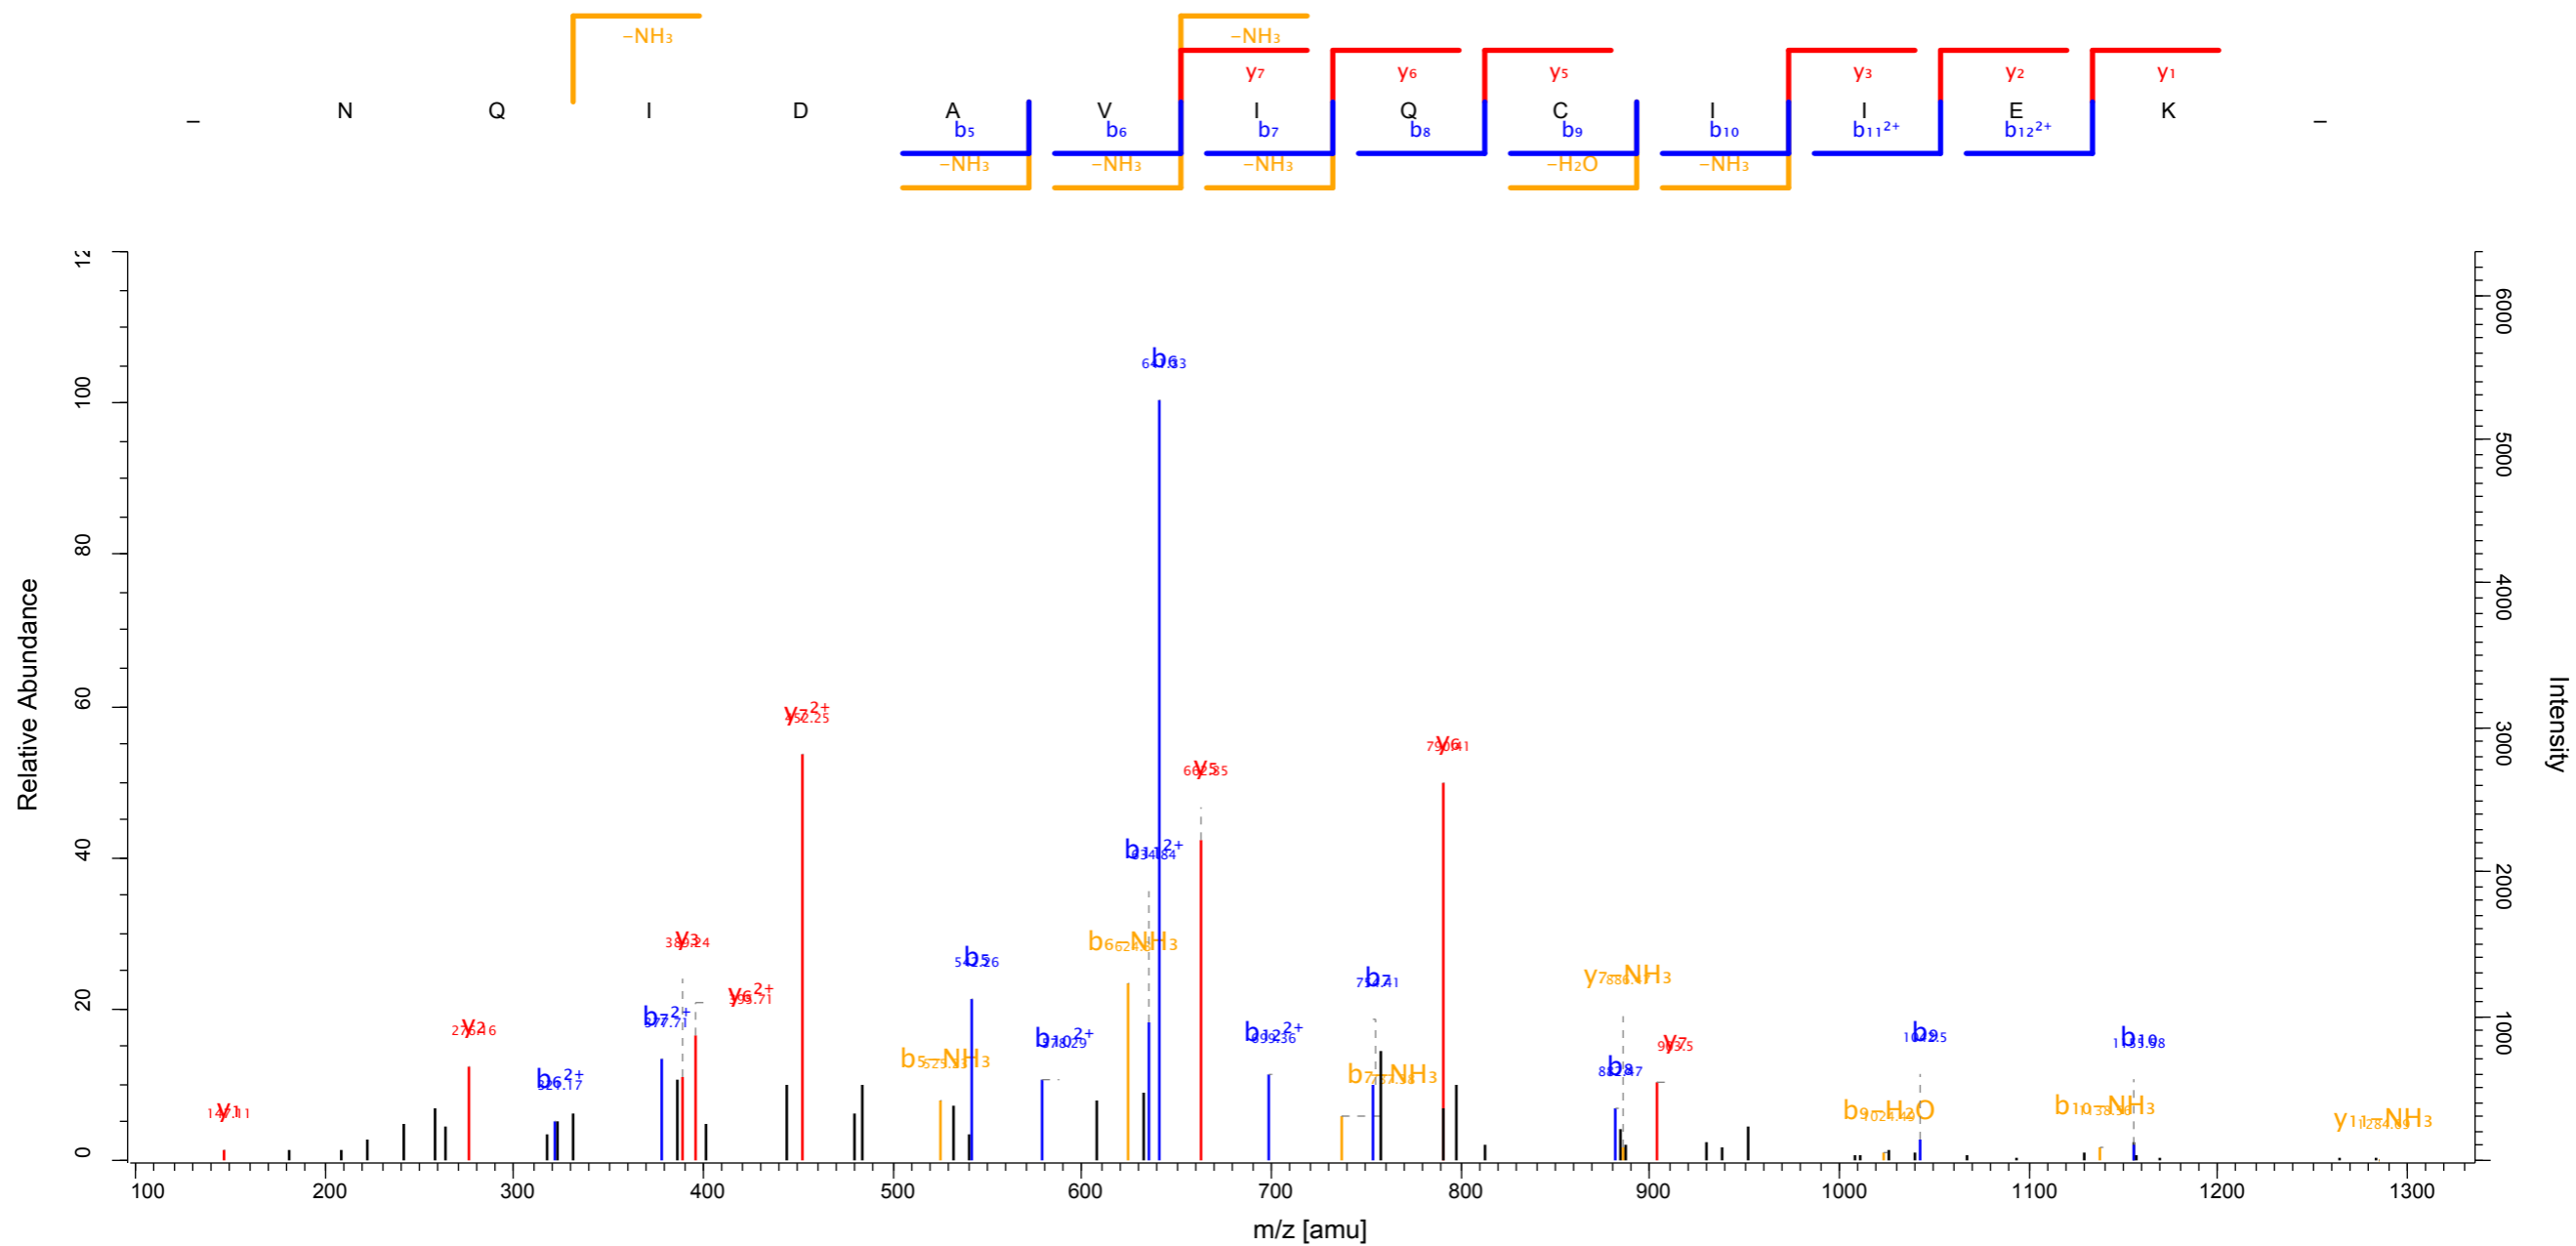

precursor information

|                   |                  |
|-------------------|------------------|
| Mass:             | 1512.80760       |
| m/z:              | 515.27651        |
| Charge:           | 2+               |
| Retention time:   | 115.002552185050 |
| Score:            | 184.5518         |
| Mass Error (ppm): | 0.074036         |
| PEP:              | 1.6387E-10       |
| Precursor Type:   | ISO              |

general information

|                       |           |
|-----------------------|-----------|
| Annotation:           | 10 of 12  |
| AminoAcids Coverage:  | 77 %      |
| Intensity Coverage:   | 73 %      |
| Peak Coverage:        | 40 %      |
| Protein Localisation: | 20 ... 32 |

| b <sup>2+</sup> ion |              | b ion      |              |    |     |    | y ion        |            | y <sup>2+</sup> ion |            |
|---------------------|--------------|------------|--------------|----|-----|----|--------------|------------|---------------------|------------|
| Δ dalton            | mass         | Δ dalton   | mass         |    | seq |    | Δ dalton     | mass       | Δ dalton            | mass       |
|                     | 115.05020391 |            | 115.05020391 | 1  | N   | 12 |              |            |                     |            |
|                     | 243.10878143 |            | 243.10878143 | 2  | Q   | 11 | 1429.7719271 |            | 1429.7719271        |            |
|                     | 356.19284541 |            | 356.19284541 | 3  | I   | 10 | 1301.7133496 |            | 1301.7133496        |            |
|                     | 471.21978844 |            | 471.21978844 | 4  | D   | 9  | 1188.6292857 |            | 1188.6292857        |            |
|                     | 542.25690223 | -0.0855765 | 542.25690223 | 5  | A   | 8  | 1073.6023426 |            | 1073.6023426        |            |
| +0.0146729          | 321.1662963  | -0.1799914 | 641.32531614 | 6  | V   | 7  | 1002.5652288 |            | 1002.5652288        |            |
| -0.0773468          | 377.70832829 | -0.0689871 | 754.40938012 | 7  | I   | 6  | 903.49681492 | +0.006542  | 452.25204569        | +0.0735158 |
|                     | 882.46795763 | -0.1635753 | 882.46795763 | 8  | Q   | 5  | 790.41275094 | -0.1271064 | 395.7100137         | +0.0087363 |
|                     | 1042.4986058 | -0.2291967 | 1042.4986058 | 9  | C   | 4  | 662.35417343 | -0.0759142 | 662.35417343        |            |
| -0.0652978          | 578.29497314 | +0.1275353 | 1155.5826698 | 10 | I   | 3  | 502.32352523 |            | 502.32352523        |            |
| -0.012054           | 634.83700513 |            | 1268.6667338 | 11 | I   | 2  | 389.23946125 | -0.0175985 | 389.23946125        |            |
| -0.0384775          | 699.35830168 |            | 1397.7093269 | 12 | E   | 1  | 276.15539727 | +0.0289289 | 276.15539727        |            |
|                     |              |            |              | 13 | K   | 0  | 147.11280417 | +0.0345042 | 147.11280417        |            |

Scan number 12622 Raw file 20091019\_Orbi6\_MaHe\_SA\_ADH\_exp3\_12h\_Gel06  
 Method ITMS; CID Genenames ZDHHC6

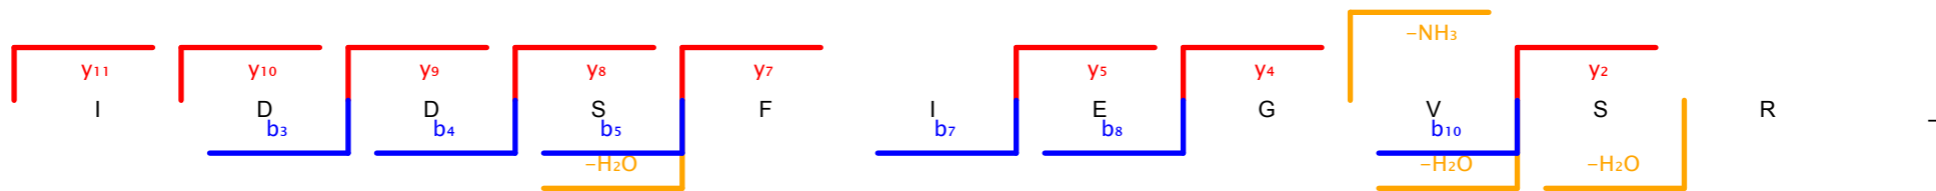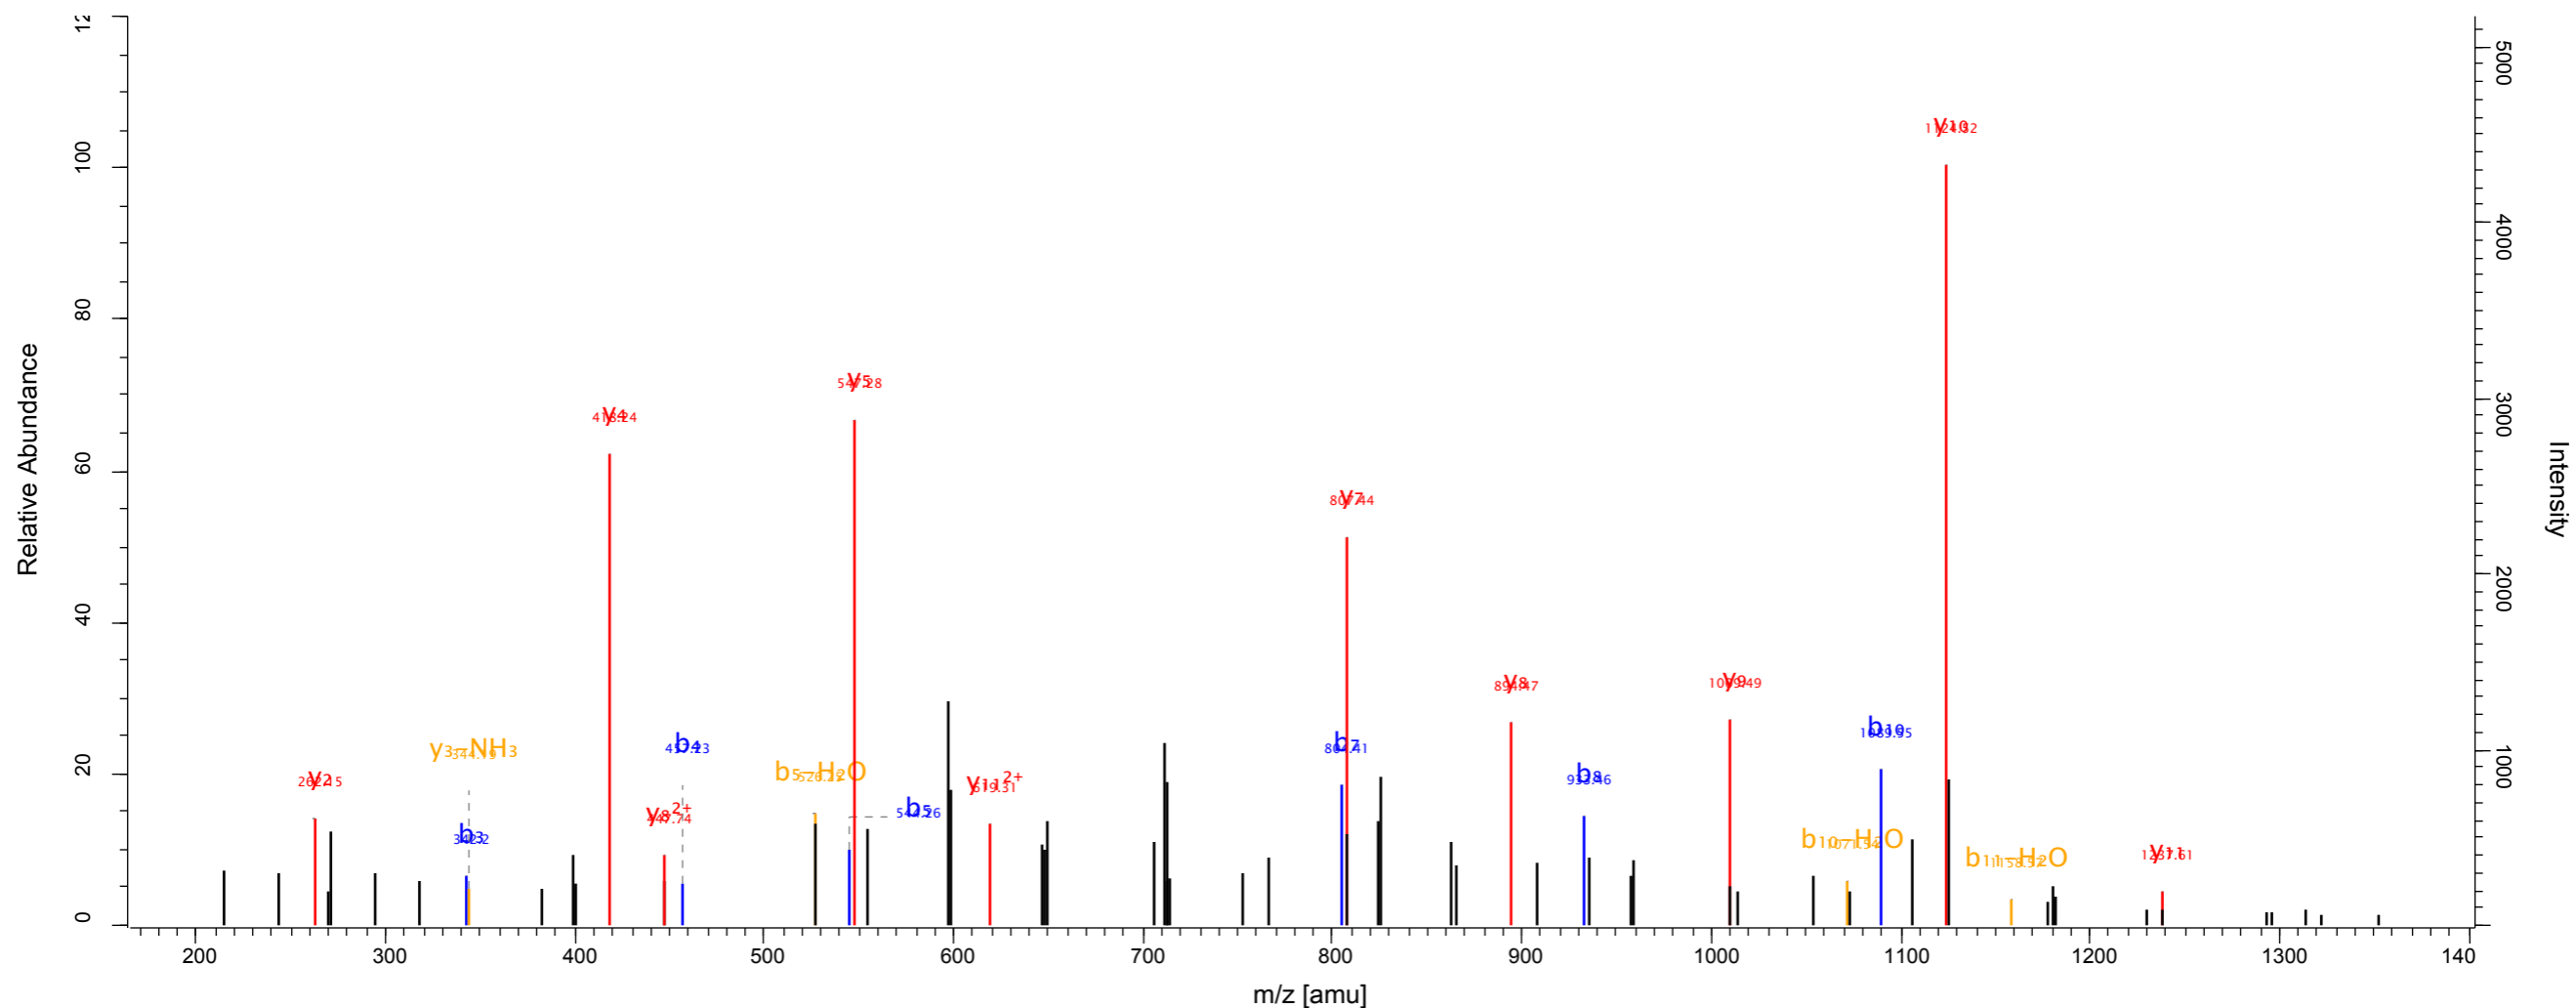

precursor information

|                   |                  |
|-------------------|------------------|
| Mass:             | 1240.68206       |
| m/z:              | 675.84881        |
| Charge:           | 2+               |
| Retentiontime:    | 75.3784103302555 |
| Score:            | 116.5462         |
| Mass Error (ppm): | 0.26912          |
| PEP:              | 0.00018541       |
| Precursor Type:   | MULTI            |

general information

|                       |             |
|-----------------------|-------------|
| Annotation:           | 10 of 12    |
| AminoAcids Coverage:  | 82 %        |
| Intensity Coverage:   | 52 %        |
| Peak Coverage:        | 20 %        |
| Protein Localisation: | 372 ... 383 |

| b ion      |                |    |     |    | y ion          |            | y <sup>2+</sup> ion |            |
|------------|----------------|----|-----|----|----------------|------------|---------------------|------------|
| Δ dalton   | mass           |    | seq |    | Δ dalton       | mass       | Δ dalton            | mass       |
|            | 114.091340447  | 1  | I   | 11 |                |            |                     |            |
|            | 227.175404427  | 2  | I   | 10 | 1237.605907678 | -0.0263178 | 619.306592072       | +0.1781491 |
| +0.0083154 | 342.202347459  | 3  | D   | 9  | 1124.521843697 | -0.1372001 | 1124.521843697      |            |
| -0.1232724 | 457.229290491  | 4  | D   | 8  | 1009.494900665 | +0.0170622 | 1009.494900665      |            |
| +0.130954  | 544.261318901  | 5  | S   | 7  | 894.467957633  | -0.0218517 | 447.73761705        | -0.0189891 |
|            | 691.329732818  | 6  | F   | 6  | 807.435929224  | -0.0787515 | 807.435929224       |            |
| -0.0801176 | 804.413796798  | 7  | I   | 5  | 660.367515307  |            | 660.367515307       |            |
| -0.2200007 | 933.456389894  | 8  | E   | 4  | 547.283451327  | -0.0357096 | 547.283451327       |            |
|            | 990.477853618  | 9  | G   | 3  | 418.240858231  | -0.1096326 | 418.240858231       |            |
| -0.290164  | 1089.546267534 | 10 | V   | 2  | 361.219394507  |            | 361.219394507       |            |
|            | 1176.578295944 | 11 | S   | 1  | 262.150980591  | +0.0159506 | 262.150980591       |            |
|            |                | 12 | R   | 0  | 175.118952181  |            | 175.118952181       |            |

Scan number 15044 Raw file 20091019\_Orbi6\_MaHe\_SA\_ADH\_exp3\_12h\_Gel06  
 Method ITMS; CID Genenames ALG3

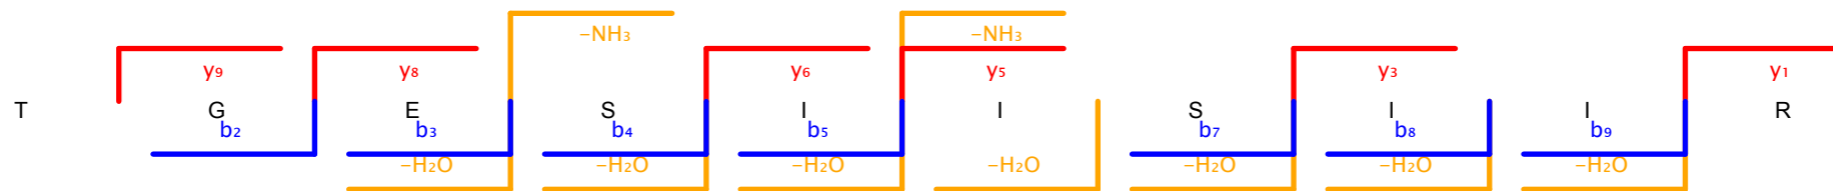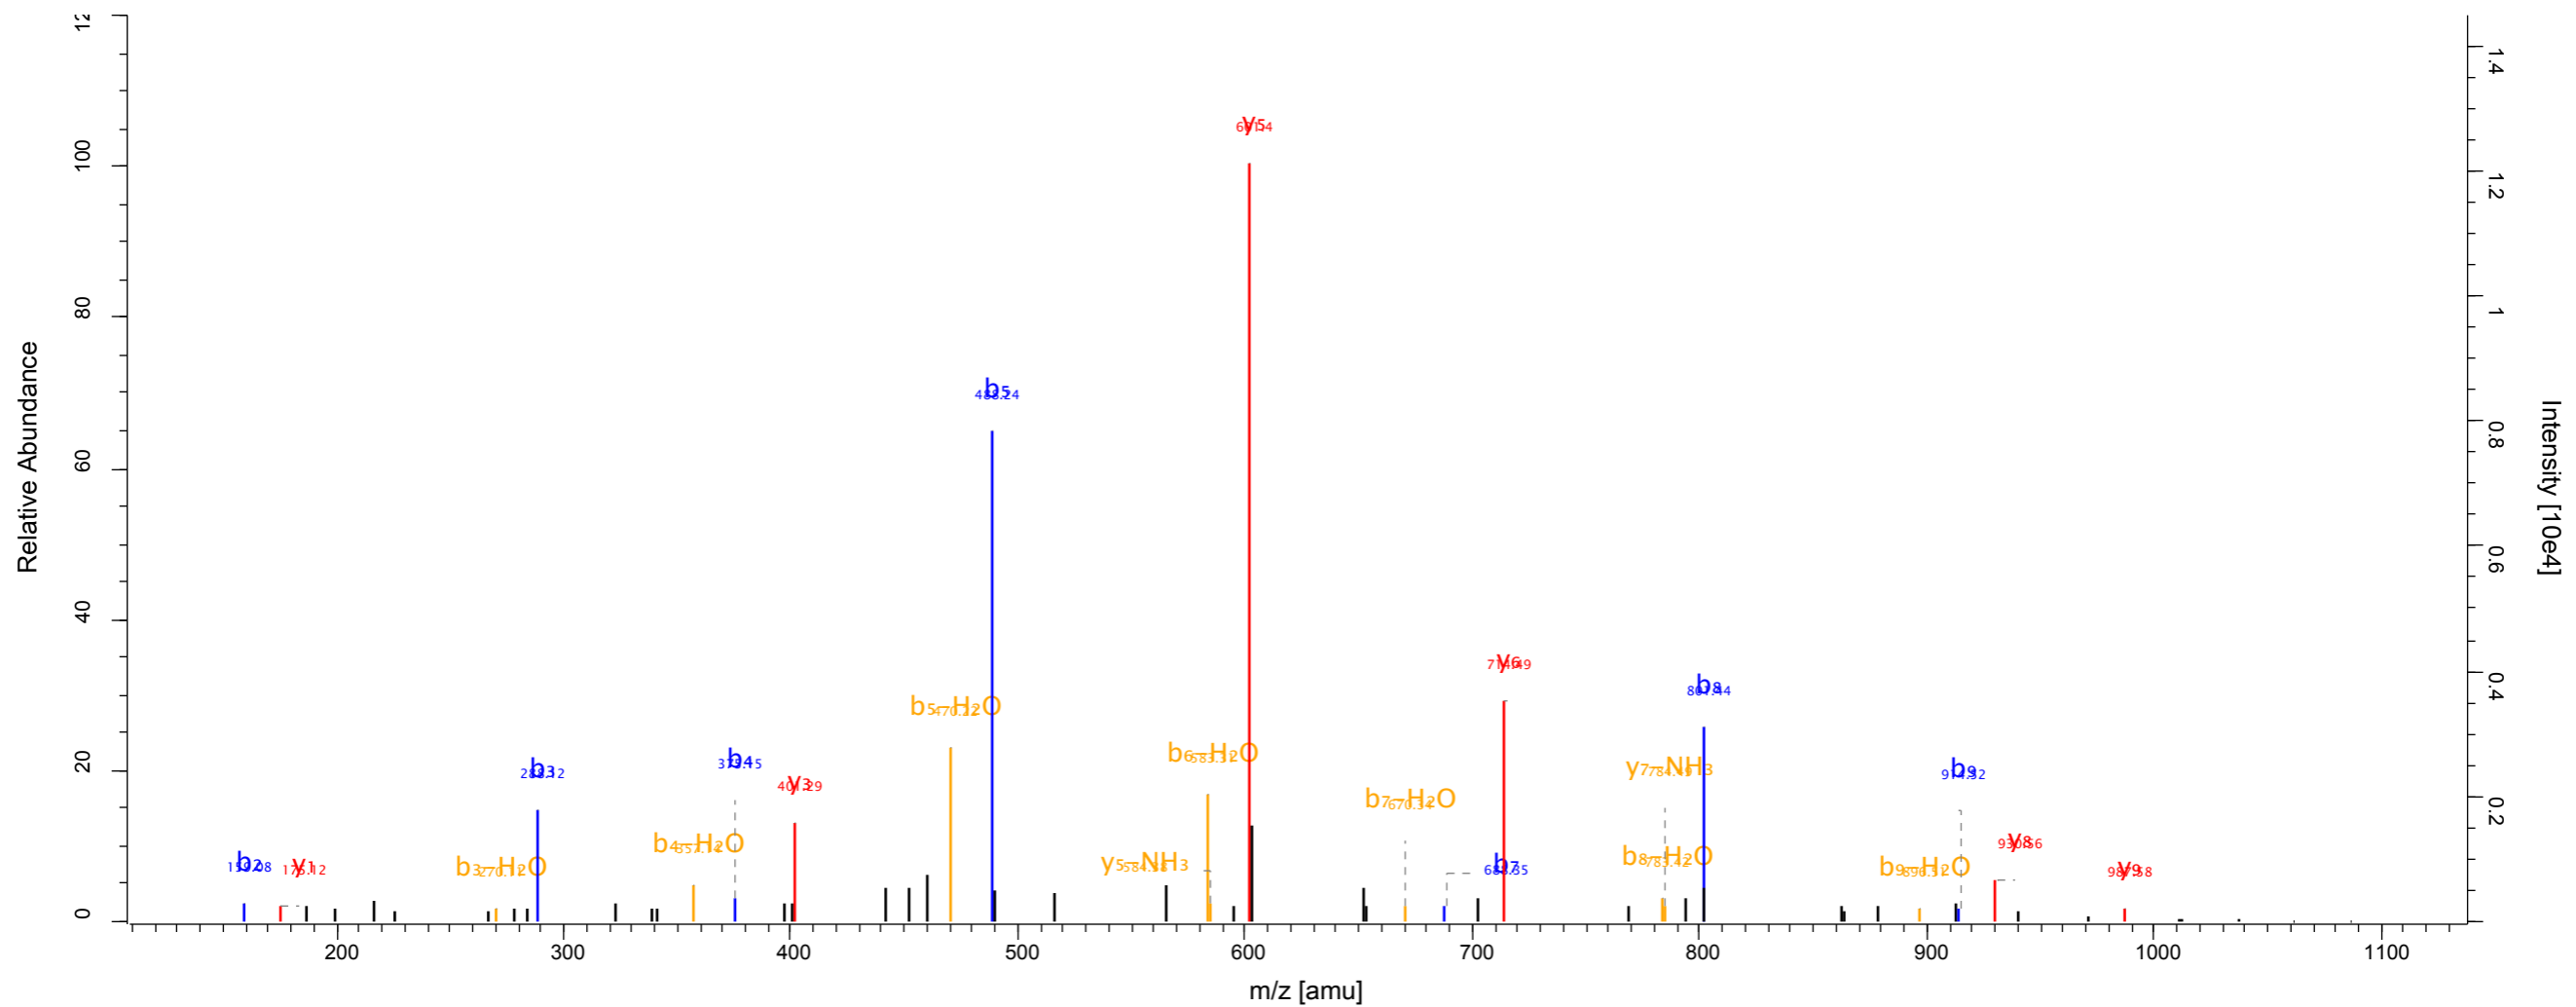

precursor information

|                       |                  |
|-----------------------|------------------|
| Mass:                 | 1087.62415       |
| m/z:                  | 544.81025        |
| Charge:               | 2+               |
| Retention time:       | 88.4122011122812 |
| Score:                | 157.6631         |
| Mass Error (ppm):     | 0.30008          |
| DEP:                  | 8.4066E-05       |
| 96 Precursor Type:    | MULTI            |
| Annotation:           | 0 of 10          |
| AminoAcids Coverage:  | 90%              |
| Intensity Coverage:   | 77%              |
| Peak Coverage:        | 37%              |
| Protein Localisation: | 312 ... 321      |

| b ion      |               |    |     |   | y ion         |            |  |
|------------|---------------|----|-----|---|---------------|------------|--|
| Δ dalton   | mass          |    | seq |   | Δ dalton      | mass       |  |
|            | 102.054954941 | 1  | T   | 9 |               |            |  |
| -0.0398433 | 159.076418664 | 2  | G   | 8 | 987.583321742 | -0.0683681 |  |
| -0.0601739 | 288.11901176  | 3  | E   | 7 | 930.561858019 | -0.1165455 |  |
| +0.1639623 | 375.15104017  | 4  | S   | 6 | 801.519264922 |            |  |
| +0.0396761 | 488.235104151 | 5  | I   | 5 | 714.487236513 | -0.2185598 |  |
|            | 601.319168131 | 6  | I   | 4 | 601.403172532 | -0.0219469 |  |
| -0.2832644 | 688.351196541 | 7  | S   | 3 | 488.319108552 |            |  |
| +0.0347712 | 801.435260522 | 8  | I   | 2 | 401.287080142 | +0.0746752 |  |
| -0.2721932 | 914.519324502 | 9  | I   | 1 | 288.203016161 |            |  |
|            |               | 10 | R   | 0 | 175.118952181 | +0.1389976 |  |

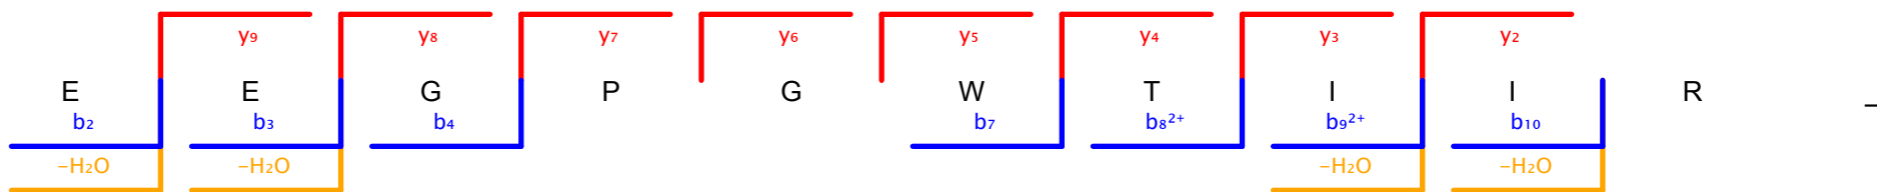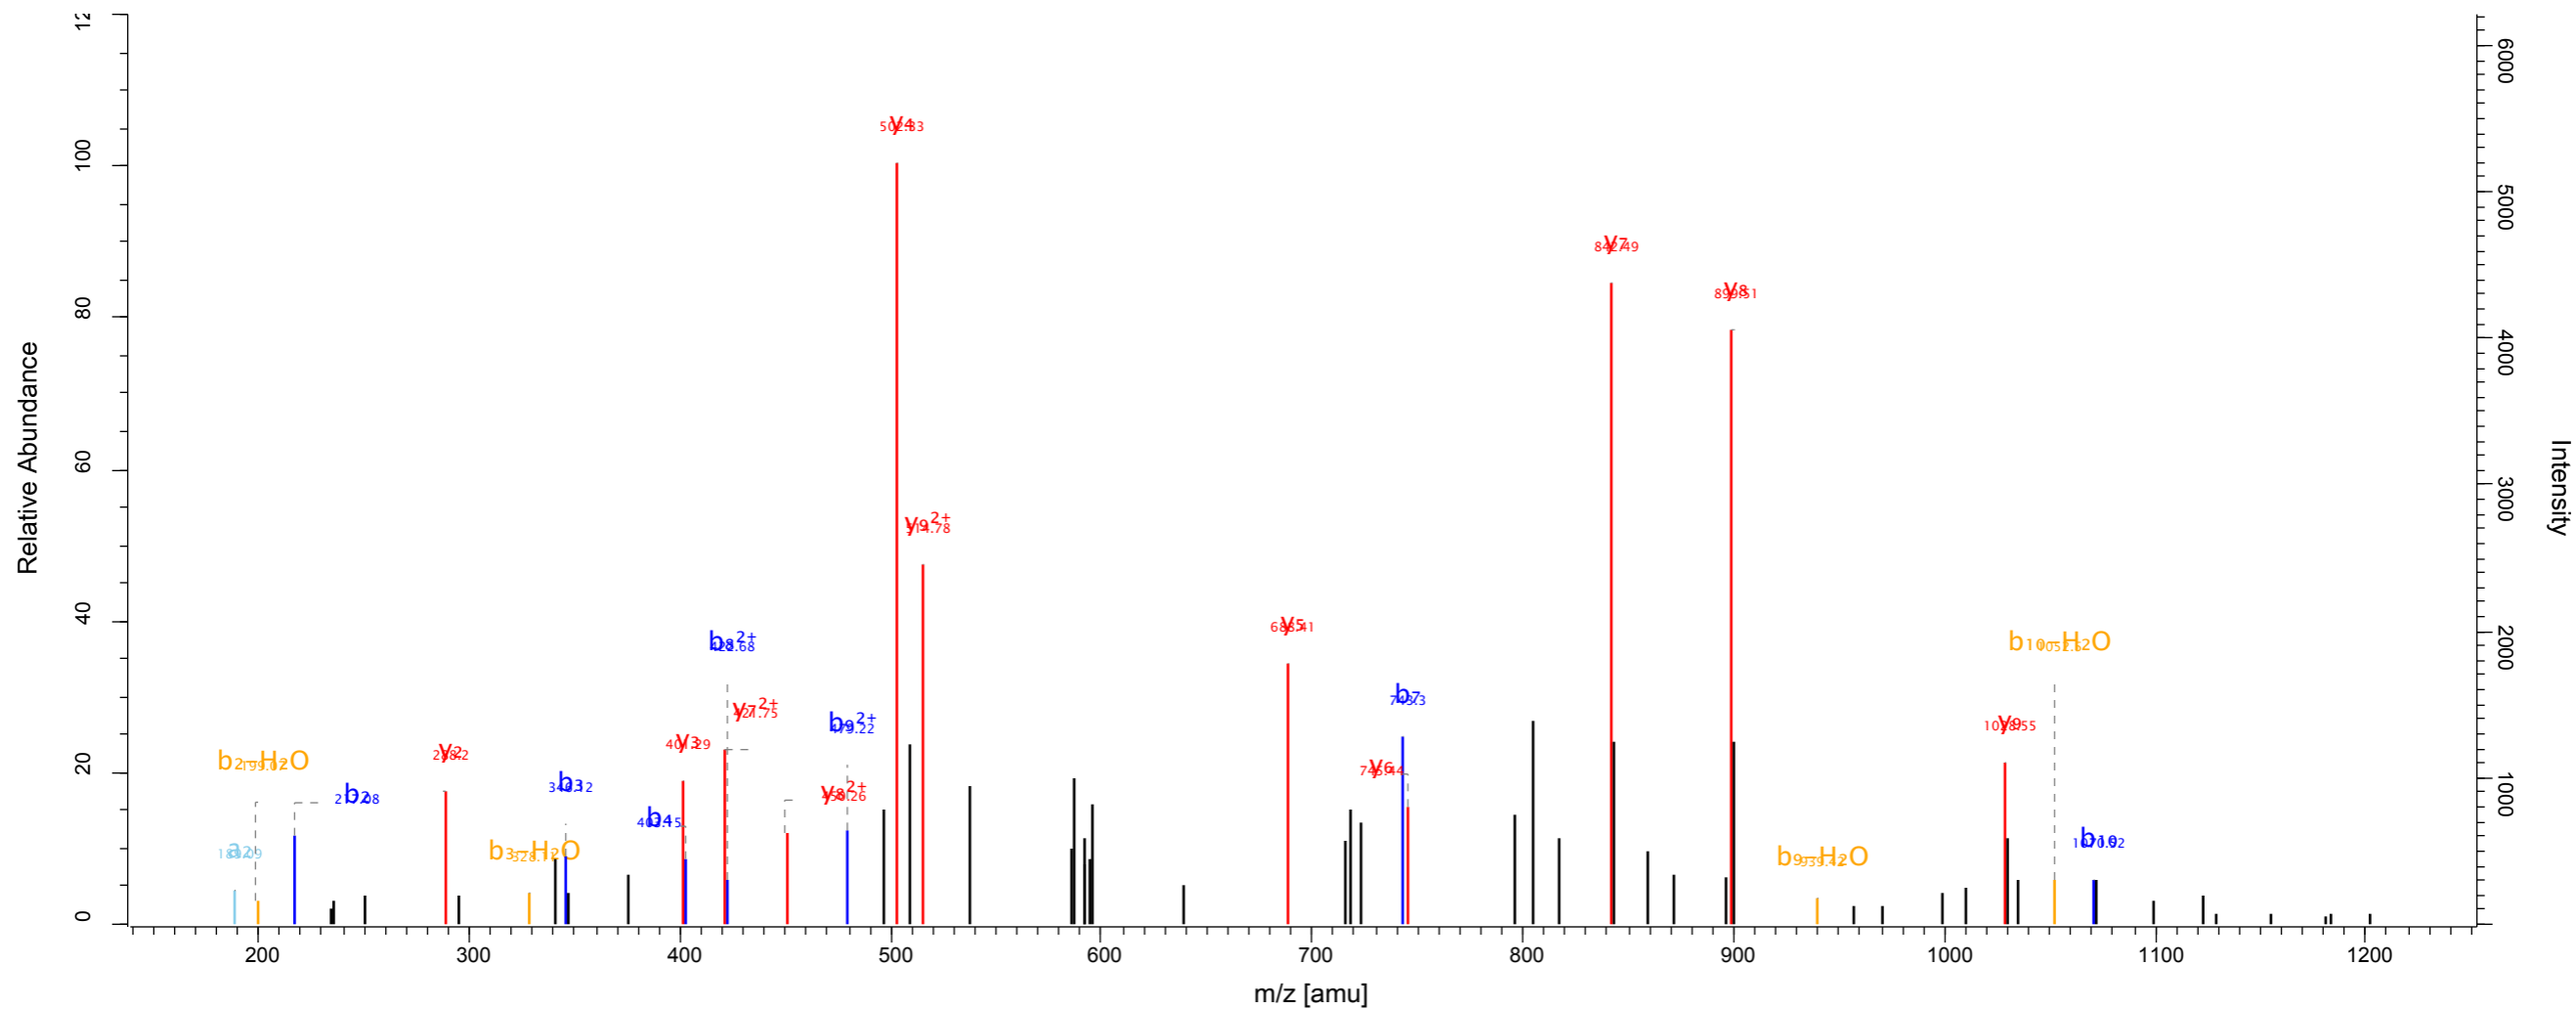

precursor information

|                   |                  |
|-------------------|------------------|
| Mass:             | 1242.61055       |
| m/z:              | 622.81705        |
| Charge:           | 2+               |
| Retention time:   | 61.1137878117060 |
| Score:            | 152.9702         |
| Mass Error (ppm): | -0.12302         |
| PEP:              | 7.4535E-05       |
| Precursor Type:   | ISO              |

general information

|                       |             |
|-----------------------|-------------|
| Annotation:           | 9 of 11     |
| AminoAcids Coverage:  | 82 %        |
| Intensity Coverage:   | 59 %        |
| Peak Coverage:        | 35 %        |
| Protein Localisation: | 240 ... 250 |

| a ion      |            | b <sup>2+</sup> ion |            | b ion      |            |    |     |    | y ion      |            | y <sup>2+</sup> ion |            |
|------------|------------|---------------------|------------|------------|------------|----|-----|----|------------|------------|---------------------|------------|
| Δ dalton   | mass       | Δ dalton            | mass       | Δ dalton   | mass       |    | seq |    | Δ dalton   | mass       | Δ dalton            | mass       |
|            | 60.0443903 |                     | 88.0393049 |            | 88.0393049 | 1  | S   | 10 |            |            |                     |            |
| +0.0249704 | 189.086983 |                     | 217.081898 | -0.0458872 | 217.081898 | 2  | E   | 9  | 1157.59495 |            |                     | 1157.59495 |
|            | 318.129576 |                     | 346.124491 | +0.0285241 | 346.124491 | 3  | E   | 8  | 1028.55236 | +0.0119751 | 514.779816          | -0.0539251 |
|            | 375.15104  |                     | 403.145955 | -0.0392653 | 403.145955 | 4  | G   | 7  | 899.509763 | -0.0746432 | 450.25852           | +0.0749154 |
|            | 472.203804 |                     | 500.198719 |            | 500.198719 | 5  | P   | 6  | 842.488299 | -0.1253231 | 421.747788          | +0.01918   |
|            | 529.225268 |                     | 557.220182 |            | 557.220182 | 6  | G   | 5  | 745.435535 | +0.0570184 | 745.435535          |            |
|            | 715.304581 |                     | 743.299495 | -0.0299641 | 743.299495 | 7  | W   | 4  | 688.414072 | -0.0196014 | 688.414072          |            |
|            | 816.352259 | -0.2236118          | 422.677225 |            | 844.347174 | 8  | T   | 3  | 502.334759 | +0.0235788 | 502.334759          |            |
|            | 929.436323 | -0.3216131          | 479.219257 |            | 957.431238 | 9  | I   | 2  | 401.28708  | +0.0251757 | 401.28708           |            |
|            | 1042.52039 |                     | 1070.5153  | -0.0715762 | 1070.5153  | 10 | I   | 1  | 288.203016 | +0.0084096 | 288.203016          |            |
|            |            |                     |            |            |            | 11 | R   | 0  | 175.118952 |            |                     | 175.118952 |

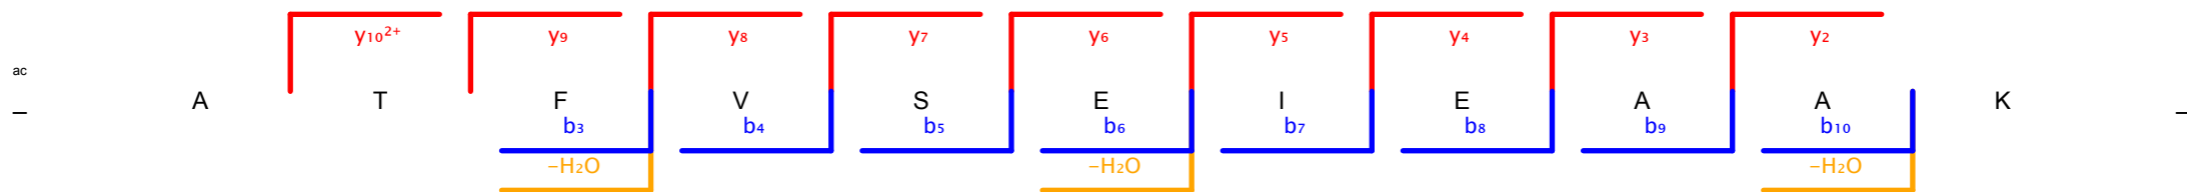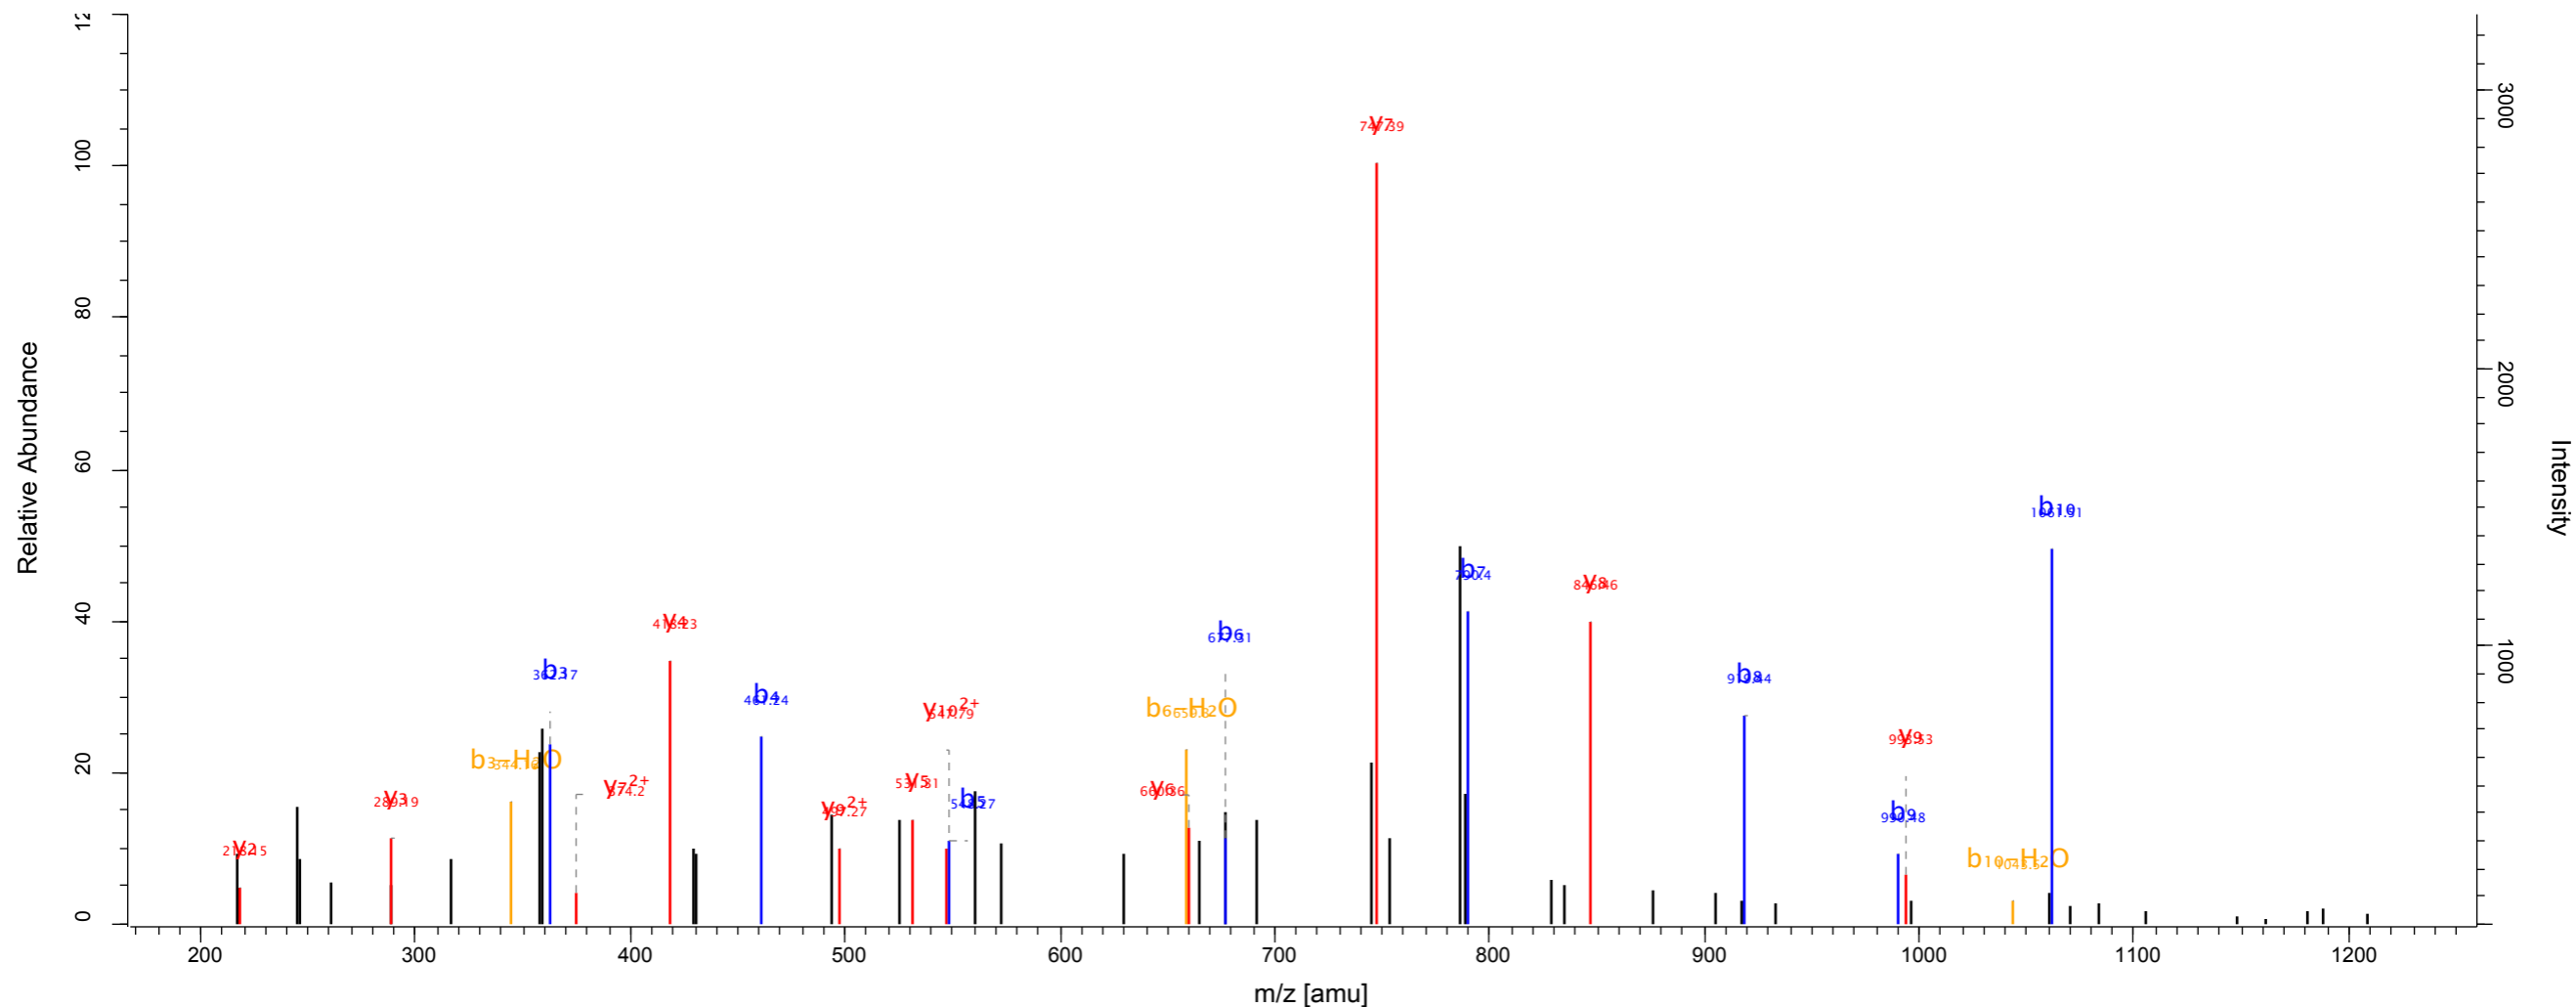

precursor information

|                   |                  |
|-------------------|------------------|
| Mass:             | 1206.6135        |
| m/z:              | 604.31402        |
| Charge:           | 2+               |
| Retention time:   | 100.548805236816 |
| Score:            | 145.9875         |
| Mass Error (ppm): | 0.22006          |
| PEP:              | 0.000148         |
| Precursor Type:   | ISO              |

general information

|                       |          |
|-----------------------|----------|
| Annotation:           | 9 of 11  |
| AminoAcids Coverage:  | 82 %     |
| Intensity Coverage:   | 57 %     |
| Peak Coverage:        | 37 %     |
| Protein Localisation: | 2 ... 12 |

| b ion      |                |    |     |    | y ion          |            | y <sup>2+</sup> ion |            |
|------------|----------------|----|-----|----|----------------|------------|---------------------|------------|
| Δ dalton   | mass           |    | seq |    | Δ dalton       | mass       | Δ dalton            | mass       |
|            | 114.054954941  | 1  | A   | 10 |                |            |                     |            |
|            | 215.102633415  | 2  | T   | 9  | 1094.572816635 |            | 547.790046551       | -0.1389845 |
| -0.130459  | 362.171047331  | 3  | F   | 8  | 993.525138161  | -0.115165  | 497.266207314       | -0.0713831 |
| -0.0142415 | 461.239461247  | 4  | V   | 7  | 846.456724245  | -0.1058331 | 846.456724245       |            |
| -0.002996  | 548.271489657  | 5  | S   | 6  | 747.388310329  | -0.0338792 | 374.197793398       | +0.0509249 |
| -0.0427204 | 677.314082753  | 6  | E   | 5  | 660.356281919  | -0.0177809 | 660.356281919       |            |
| -0.2071677 | 790.398146734  | 7  | I   | 4  | 531.313688823  | +0.0657057 | 531.313688823       |            |
| -0.3836109 | 919.44073983   | 8  | E   | 3  | 418.229624842  | +0.0411881 | 418.229624842       |            |
| -0.2983492 | 990.477853618  | 9  | A   | 2  | 289.187031746  | -0.019124  | 289.187031746       |            |
| -0.2266373 | 1061.514967406 | 10 | A   | 1  | 218.149917958  | +0.1171566 | 218.149917958       |            |
|            |                | 11 | K   | 0  | 147.112804171  |            | 147.112804171       |            |



Scan number 19077 Raw file 20091019\_Orbi6\_MaHe\_SA\_ADH\_exp3\_12h\_Gel07  
 Method ITMS; CID Genenames E2F3;DKFZp686C18211

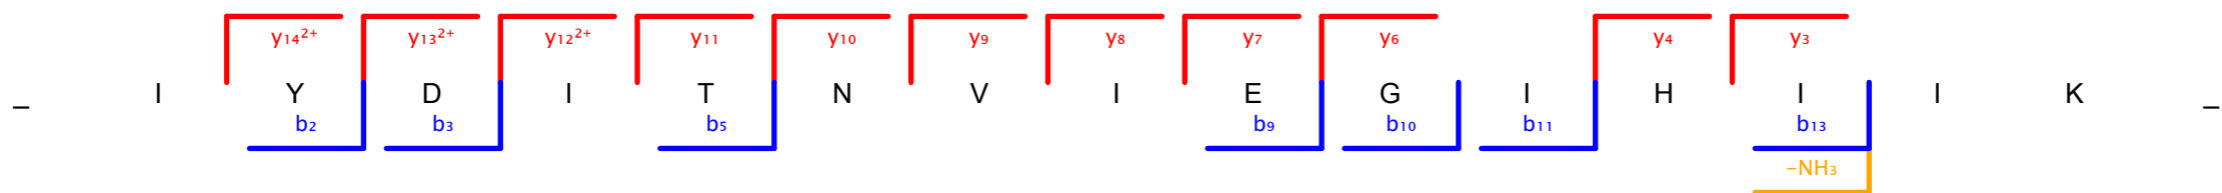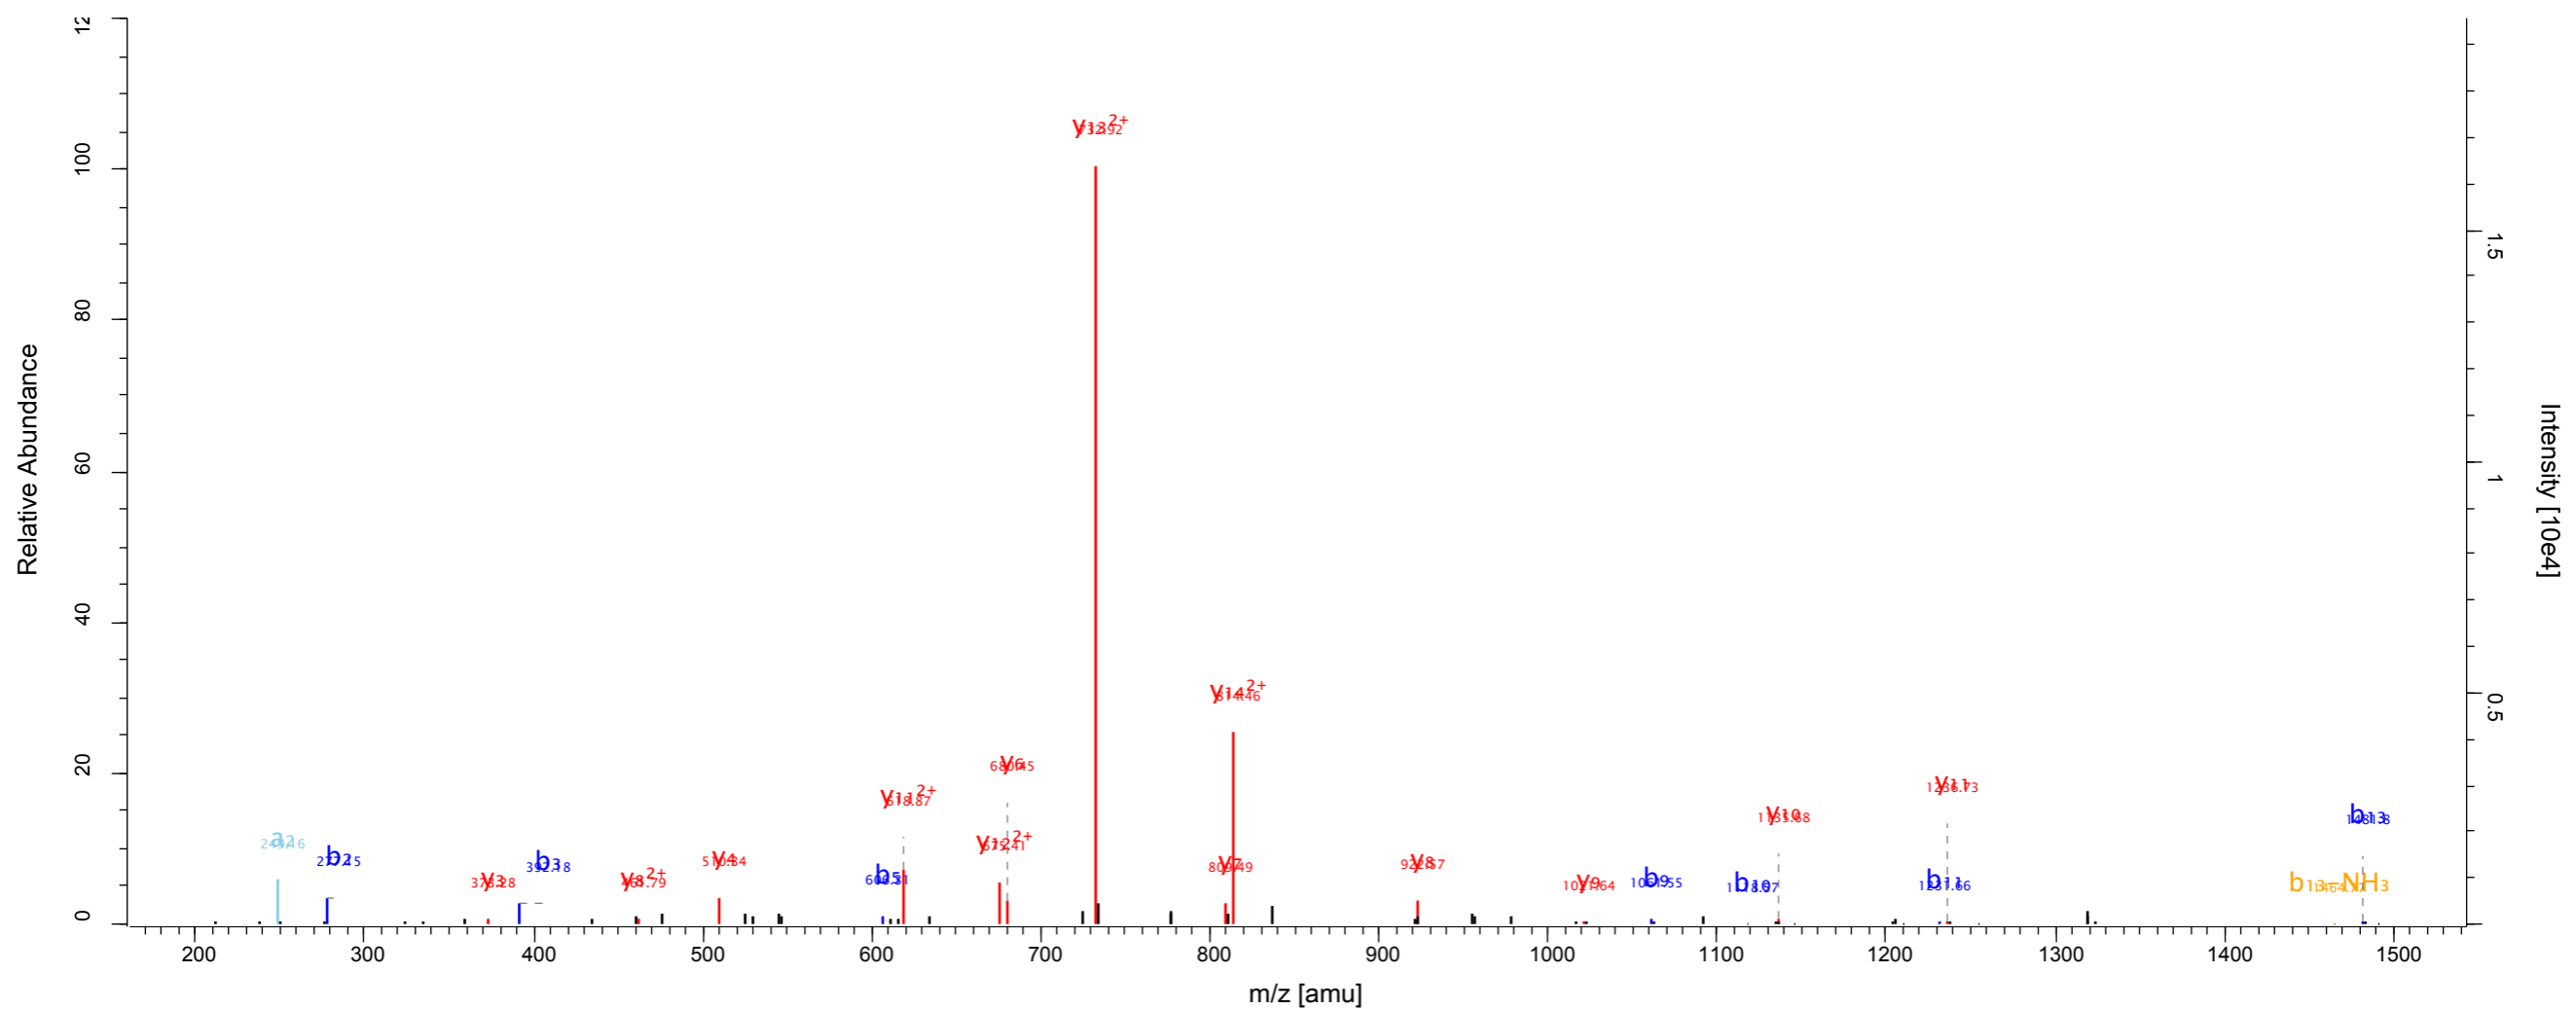

precursor information

|                   |                  |
|-------------------|------------------|
| Mass:             | 1720.08262       |
| m/z:              | 581.00148        |
| Charge:           | 2+               |
| Potentiaotime:    | 114.285284423828 |
| Score:            | 124.2065         |
| Mass Error [ppm]: | 0.25852          |
| PEP:              | 0.00012181       |
| Precursor Type:   | ISO              |

general information

|                       |             |
|-----------------------|-------------|
| Annotation:           | 12 of 15    |
| AminoAcids Coverage:  | 80%         |
| Intensity Coverage:   | 82%         |
| Peak Coverage:        | 22%         |
| Protein Localisation: | 218 ... 232 |

| a ion      |              | b ion      |              |    |     |    | y ion        |            | y <sup>2+</sup> ion |            |
|------------|--------------|------------|--------------|----|-----|----|--------------|------------|---------------------|------------|
| Δ dalton   | mass         | Δ dalton   | mass         |    | seq |    | Δ dalton     | mass       | Δ dalton            | mass       |
|            | 86.096425825 |            | 114.09134045 | 1  | I   | 14 |              |            |                     |            |
| +0.0433859 | 249.15975436 | -0.0189878 | 277.15466899 | 2  | Y   | 13 | 1627.9053842 |            | 814.45633031        | +0.125884  |
|            | 364.1866974  | -0.0679035 | 392.18161202 | 3  | D   | 12 | 1464.8420556 |            | 732.92466605        | +0.1126875 |
|            | 477.27076138 |            | 505.265676   | 4  | I   | 11 | 1349.8151126 |            | 675.41119453        | +0.2069085 |
|            | 578.31843985 | -0.1069946 | 606.31335447 | 5  | T   | 10 | 1236.7310486 | -0.0516053 | 618.86916254        | +0.1194239 |
|            | 692.3613673  |            | 720.35628192 | 6  | N   | 9  | 1135.6833701 | +0.341166  | 1135.6833701        |            |
|            | 791.42978121 |            | 819.42469584 | 7  | V   | 8  | 1021.6404427 | +0.0893547 | 1021.6404427        |            |
|            | 904.51384519 |            | 932.50875982 | 8  | I   | 7  | 922.57202877 | +0.1062549 | 461.78965262        | -0.4074505 |
|            | 1033.5564383 | +0.1174703 | 1061.5513529 | 9  | E   | 6  | 809.48796479 | -0.1006967 | 809.48796479        |            |
|            | 1090.577902  | -0.2482317 | 1118.5728166 | 10 | G   | 5  | 680.4453717  | -0.0380841 | 680.4453717         |            |
|            | 1203.661966  | -0.0807087 | 1231.6568806 | 11 | I   | 4  | 623.42390797 |            | 623.42390797        |            |
|            | 1340.7208779 |            | 1368.7157925 | 12 | H   | 3  | 510.33984399 | -0.00647   | 510.33984399        |            |
|            | 1453.8049418 | +0.3863008 | 1481.7998565 | 13 | I   | 2  | 373.28093213 | -0.1218745 | 373.28093213        |            |
|            | 1566.8890058 |            | 1594.8839204 | 14 | I   | 1  | 260.19686815 |            | 260.19686815        |            |
|            |              |            |              | 15 | K   | 0  | 147.11280417 |            | 147.11280417        |            |

Scan number 20507 Raw file 20091019\_Orbi6\_MaHe\_SA\_ADH\_exp3\_12h\_Gel07  
 Method ITMS; CID Genenames TMEM135

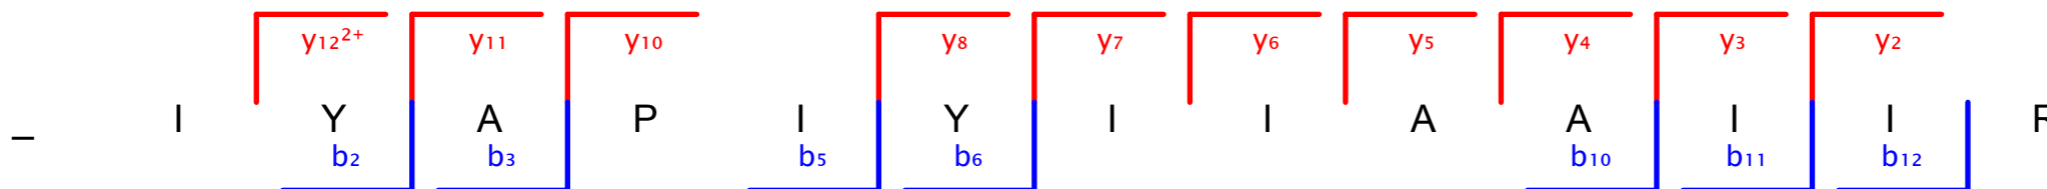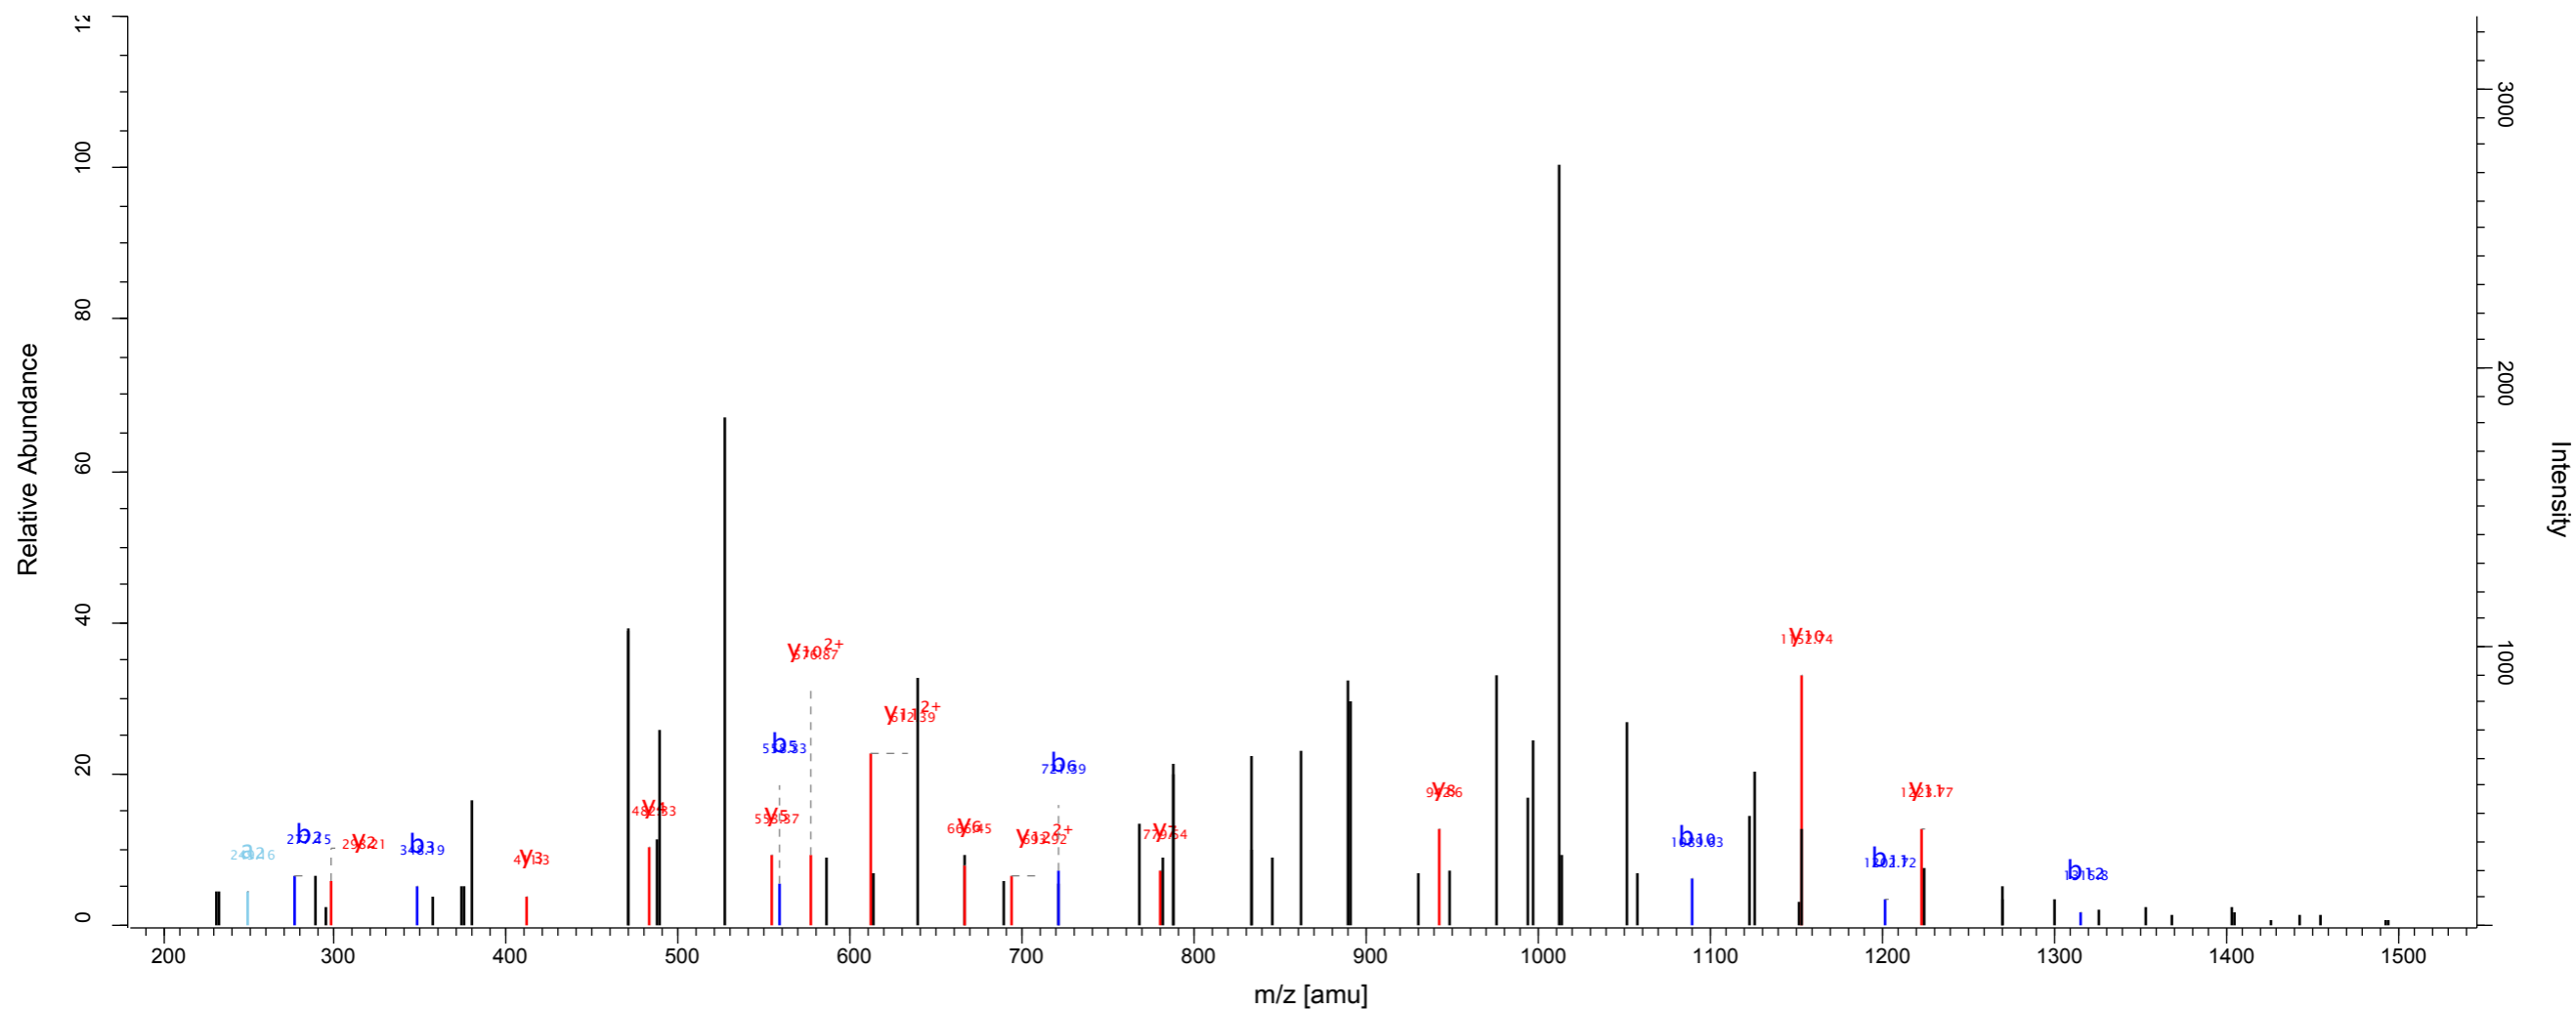

precursor information

|                   |                  |
|-------------------|------------------|
| Mass:             | 1499.72048       |
| m/z:              | 750.86752        |
| Charge:           | 2+               |
| Retention time:   | 122.450227607754 |
| Score:            | 121.3605         |
| Mass Error (ppm): | -0.50079         |
| PEP:              | 8.2486E-08       |
| Precursor Type:   | ISO              |

general information

|                       |           |
|-----------------------|-----------|
| Annotation:           | 11 of 12  |
| AminoAcids Coverage:  | 85 %      |
| Intensity Coverage:   | 18 %      |
| Peak Coverage:        | 26 %      |
| Protein Localisation: | 41 ... 53 |

| a ion     |              | b ion      |              |    |     |    | y ion        |            | y <sup>2+</sup> ion |            |
|-----------|--------------|------------|--------------|----|-----|----|--------------|------------|---------------------|------------|
| Δ dalton  | mass         | Δ dalton   | mass         |    | seq |    | Δ dalton     | mass       | Δ dalton            | mass       |
|           | 86.096425825 |            | 114.09134045 | 1  | I   | 12 |              |            |                     |            |
| +0.016622 | 249.15975436 | -0.1479551 | 277.15466899 | 2  | Y   | 11 | 1386.838303  |            | 693.92278972        | -0.0137931 |
|           | 320.19686815 | -0.0761212 | 348.19178277 | 3  | A   | 10 | 1223.7749744 | -0.1225086 | 612.39112545        | -0.0945556 |
|           | 417.249632   |            | 445.24454663 | 4  | P   | 9  | 1152.7378606 | -0.0156927 | 576.87256856        | -0.0900368 |
|           | 530.33369598 | -0.0490696 | 558.32861061 | 5  | I   | 8  | 1055.6850968 |            | 1055.6850968        |            |
|           | 693.39702452 | +0.2837811 | 721.39193914 | 6  | Y   | 7  | 942.60103282 | -0.0191847 | 942.60103282        |            |
|           | 806.4810885  |            | 834.47600312 | 7  | I   | 6  | 779.53770428 | +0.0224154 | 779.53770428        |            |
|           | 919.56515248 |            | 947.5600671  | 8  | I   | 5  | 666.4536403  | -0.0417751 | 666.4536403         |            |
|           | 990.60226627 |            | 1018.5971809 | 9  | A   | 4  | 553.36957632 | +0.0540077 | 553.36957632        |            |
|           | 1061.6393801 | -0.3326589 | 1089.6342947 | 10 | A   | 3  | 482.33246253 | +0.0783041 | 482.33246253        |            |
|           | 1174.723444  | -0.2266594 | 1202.7183587 | 11 | I   | 2  | 411.29534874 | -0.0031124 | 411.29534874        |            |
|           | 1287.807508  | +0.368842  | 1315.8024226 | 12 | I   | 1  | 298.21128476 | -0.0368463 | 298.21128476        |            |
|           |              |            |              | 13 | R   | 0  | 185.12722078 |            | 185.12722078        |            |

Scan number 18871 Raw file 20091019\_Orbi6\_MaHe\_SA\_ADH\_exp3\_12h\_Gel08  
 Method ITMS; CID Genenames METTL22

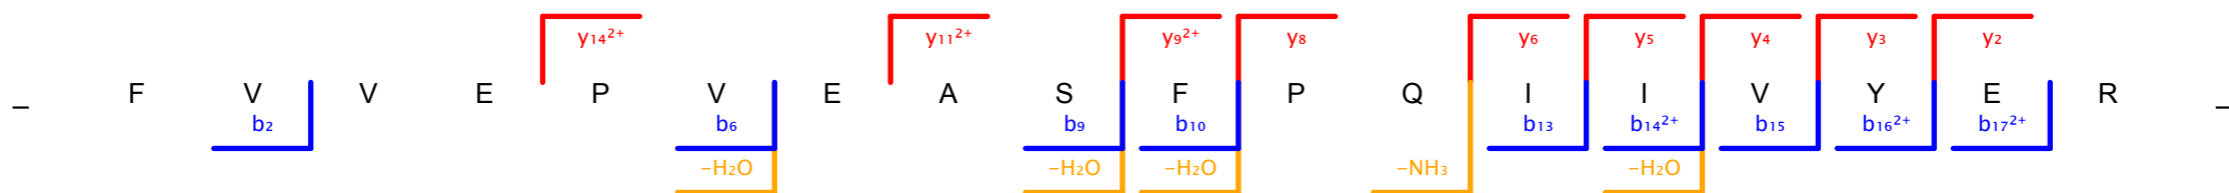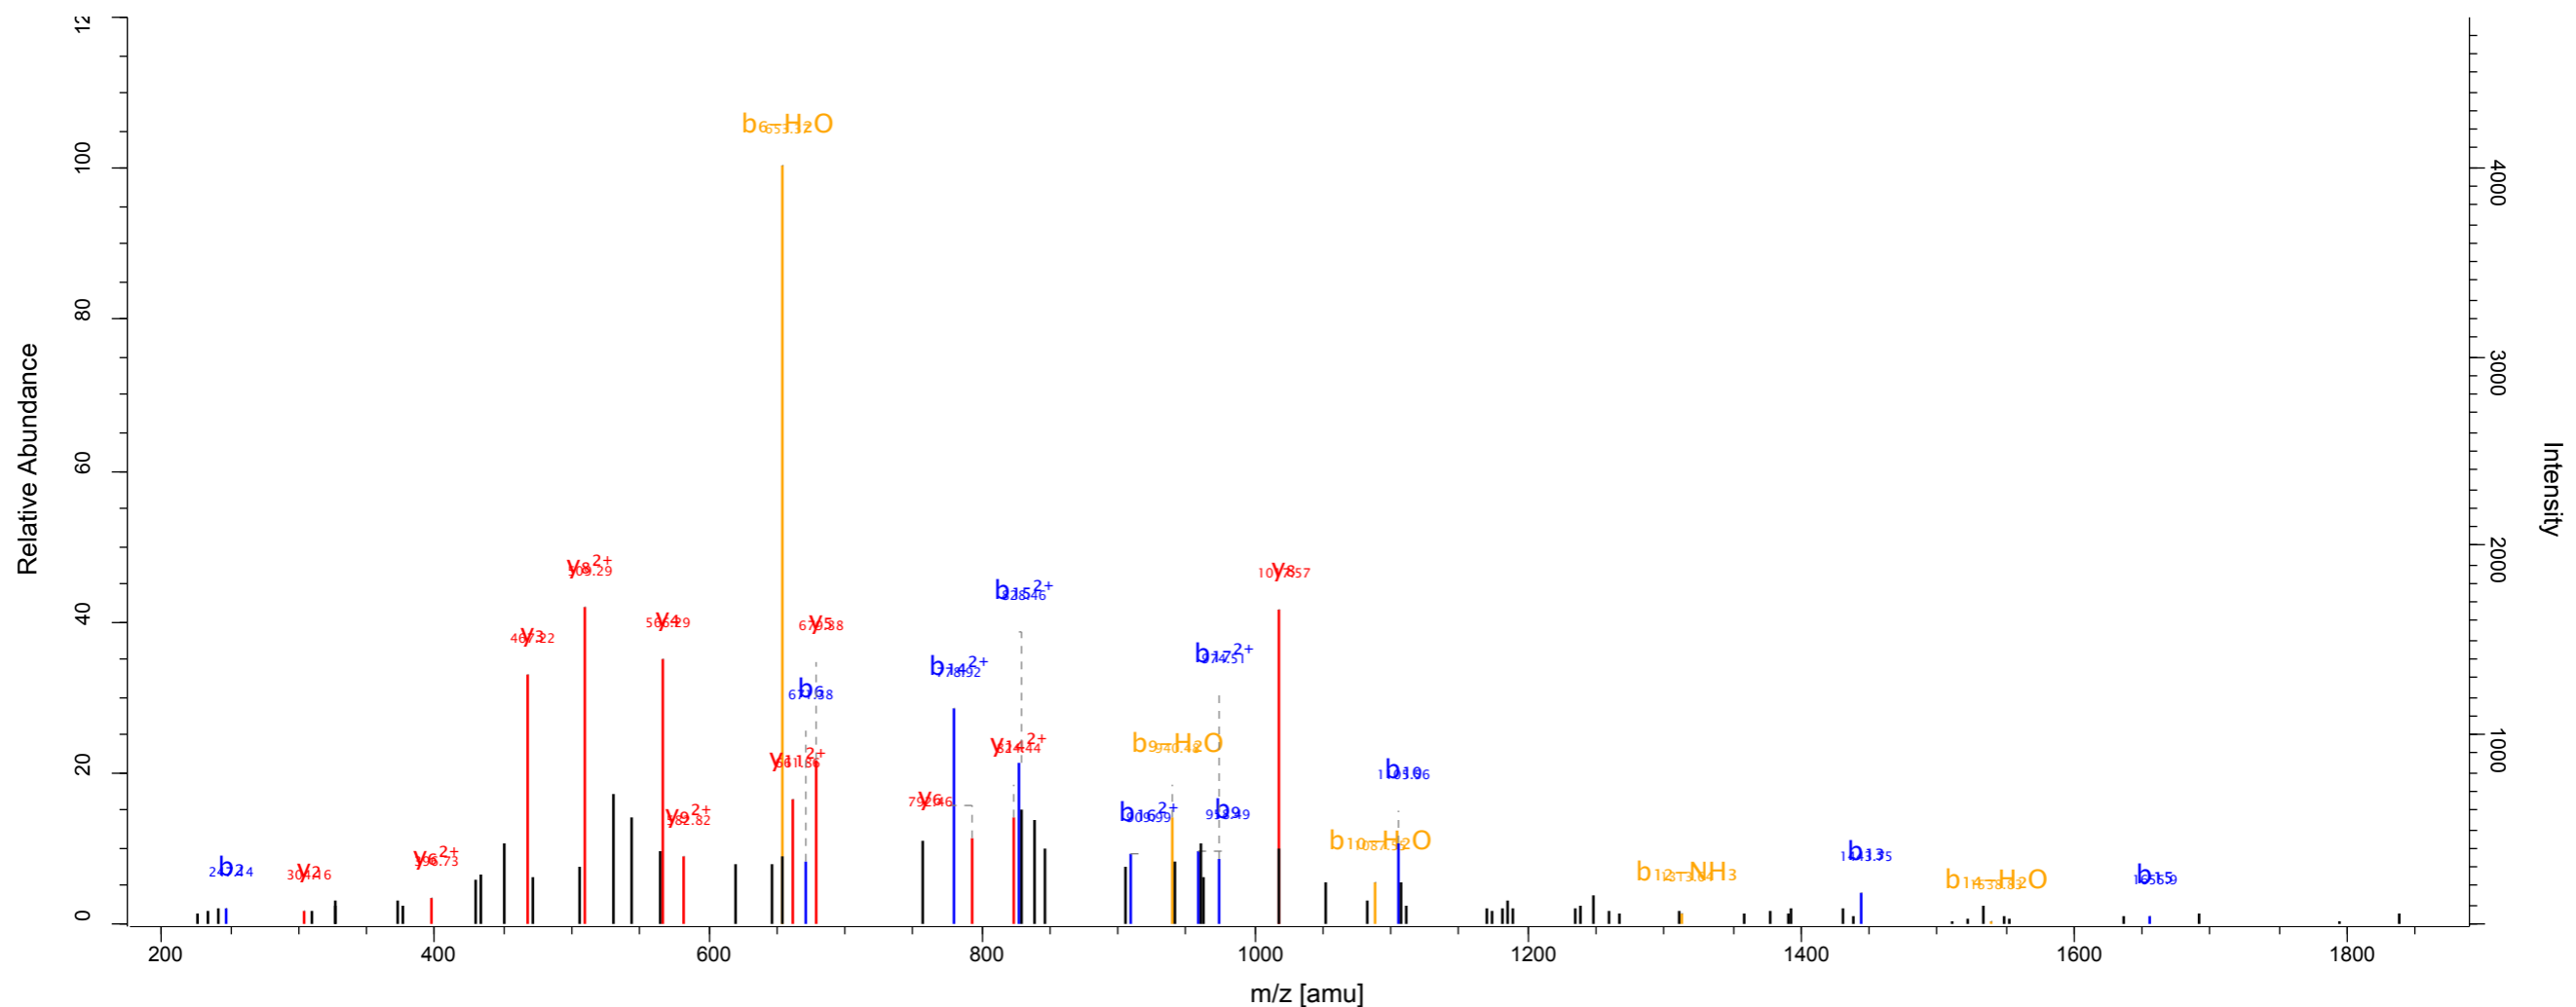

precursor information

|                   |                  |
|-------------------|------------------|
| Mass:             | 2121.11554       |
| m/z:              | 708.04570        |
| Charge:           | 2+               |
| Potenttime:       | 112.175758261816 |
| Score:            | 124.6202         |
| Mass Error (ppm): | 0.42286          |
| DEP:              | 1.27175_07       |
| Precursor Type:   | MULTI            |

| b <sup>2+</sup> ion |              | b ion      |              |    |     |    | y ion        |            | y <sup>2+</sup> ion |            |
|---------------------|--------------|------------|--------------|----|-----|----|--------------|------------|---------------------|------------|
| Δ dalton            | mass         | Δ dalton   | mass         |    | seq |    | Δ dalton     | mass       | Δ dalton            | mass       |
|                     | 148.07569038 |            | 148.07569038 | 1  | F   | 17 |              |            |                     |            |
|                     | 247.1441043  | -0.1897586 | 247.1441043  | 2  | V   | 16 | 1975.053505  |            | 1975.053505         |            |
|                     | 346.21251822 |            | 346.21251822 | 3  | V   | 15 | 1875.985091  |            | 1875.985091         |            |
|                     | 475.25511131 |            | 475.25511131 | 4  | E   | 14 | 1776.9166771 |            | 1776.9166771        |            |
|                     | 572.30787516 |            | 572.30787516 | 5  | P   | 13 | 1647.874084  |            | 824.44068025        | +0.0185483 |
|                     | 671.37628908 | -0.3071973 | 671.37628908 | 6  | V   | 12 | 1550.8213202 |            | 1550.8213202        |            |
|                     | 800.41888218 |            | 800.41888218 | 7  | E   | 11 | 1451.7529063 |            | 1451.7529063        |            |
|                     | 871.45599596 |            | 871.45599596 | 8  | A   | 10 | 1322.7103132 |            | 661.85879482        | +0.0164493 |
|                     | 958.48802437 | +0.0016607 | 958.48802437 | 9  | S   | 9  | 1251.6731994 |            | 1251.6731994        |            |
|                     | 1105.5564383 | -0.2037772 | 1105.5564383 | 10 | F   | 8  | 1164.641171  |            | 582.82422372        | -0.0076954 |
|                     | 1202.6092021 |            | 1202.6092021 | 11 | P   | 7  | 1017.5727571 | -0.0642121 | 509.29001676        | +0.2328104 |
|                     | 1330.6677797 |            | 1330.6677797 | 12 | Q   | 6  | 920.5199932  |            | 920.5199932         |            |
|                     | 1443.7518436 | +0.0518673 | 1443.7518436 | 13 | I   | 5  | 792.46141569 | +0.0691629 | 396.73434608        | +0.0818771 |
| +0.0425803          | 778.92159204 |            | 1556.8359076 | 14 | I   | 4  | 679.37735171 | +0.0136395 | 679.37735171        |            |
| -0.256092           | 828.455799   | +0.164282  | 1655.9043215 | 15 | V   | 3  | 566.29328773 | +0.0806747 | 566.29328773        |            |
| -0.3434203          | 909.98746327 |            | 1818.9676501 | 16 | Y   | 2  | 467.22487382 | -0.0431111 | 467.22487382        |            |
| -0.0810865          | 974.50875982 |            | 1948.0102432 | 17 | E   | 1  | 304.16154528 | -0.134232  | 304.16154528        |            |
|                     |              |            |              | 18 | R   | 0  | 175.11895218 |            | 175.11895218        |            |

general information

|                       |             |
|-----------------------|-------------|
| Annotation:           | 12 of 18    |
| AminoAcids Coverage:  | 72%         |
| Intensity Coverage:   | 62%         |
| Peak Coverage:        | 21%         |
| Protein Localisation: | 372 ... 389 |

Scan number 19957 Raw file 20091019\_Orbi6\_MaHe\_SA\_ADH\_exp3\_12h\_Gel08  
 Method ITMS; CID Genenames FBXW2

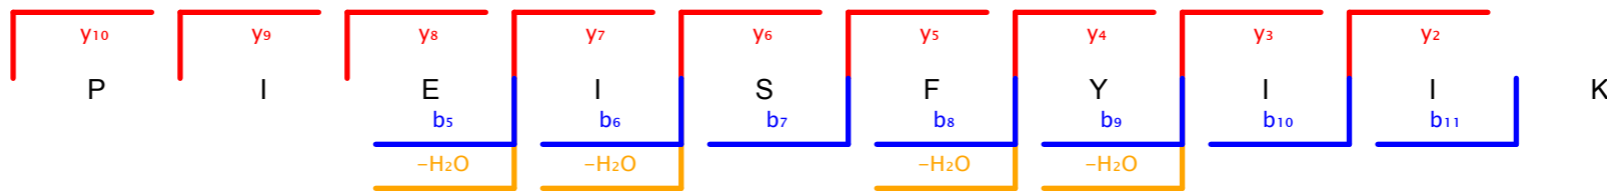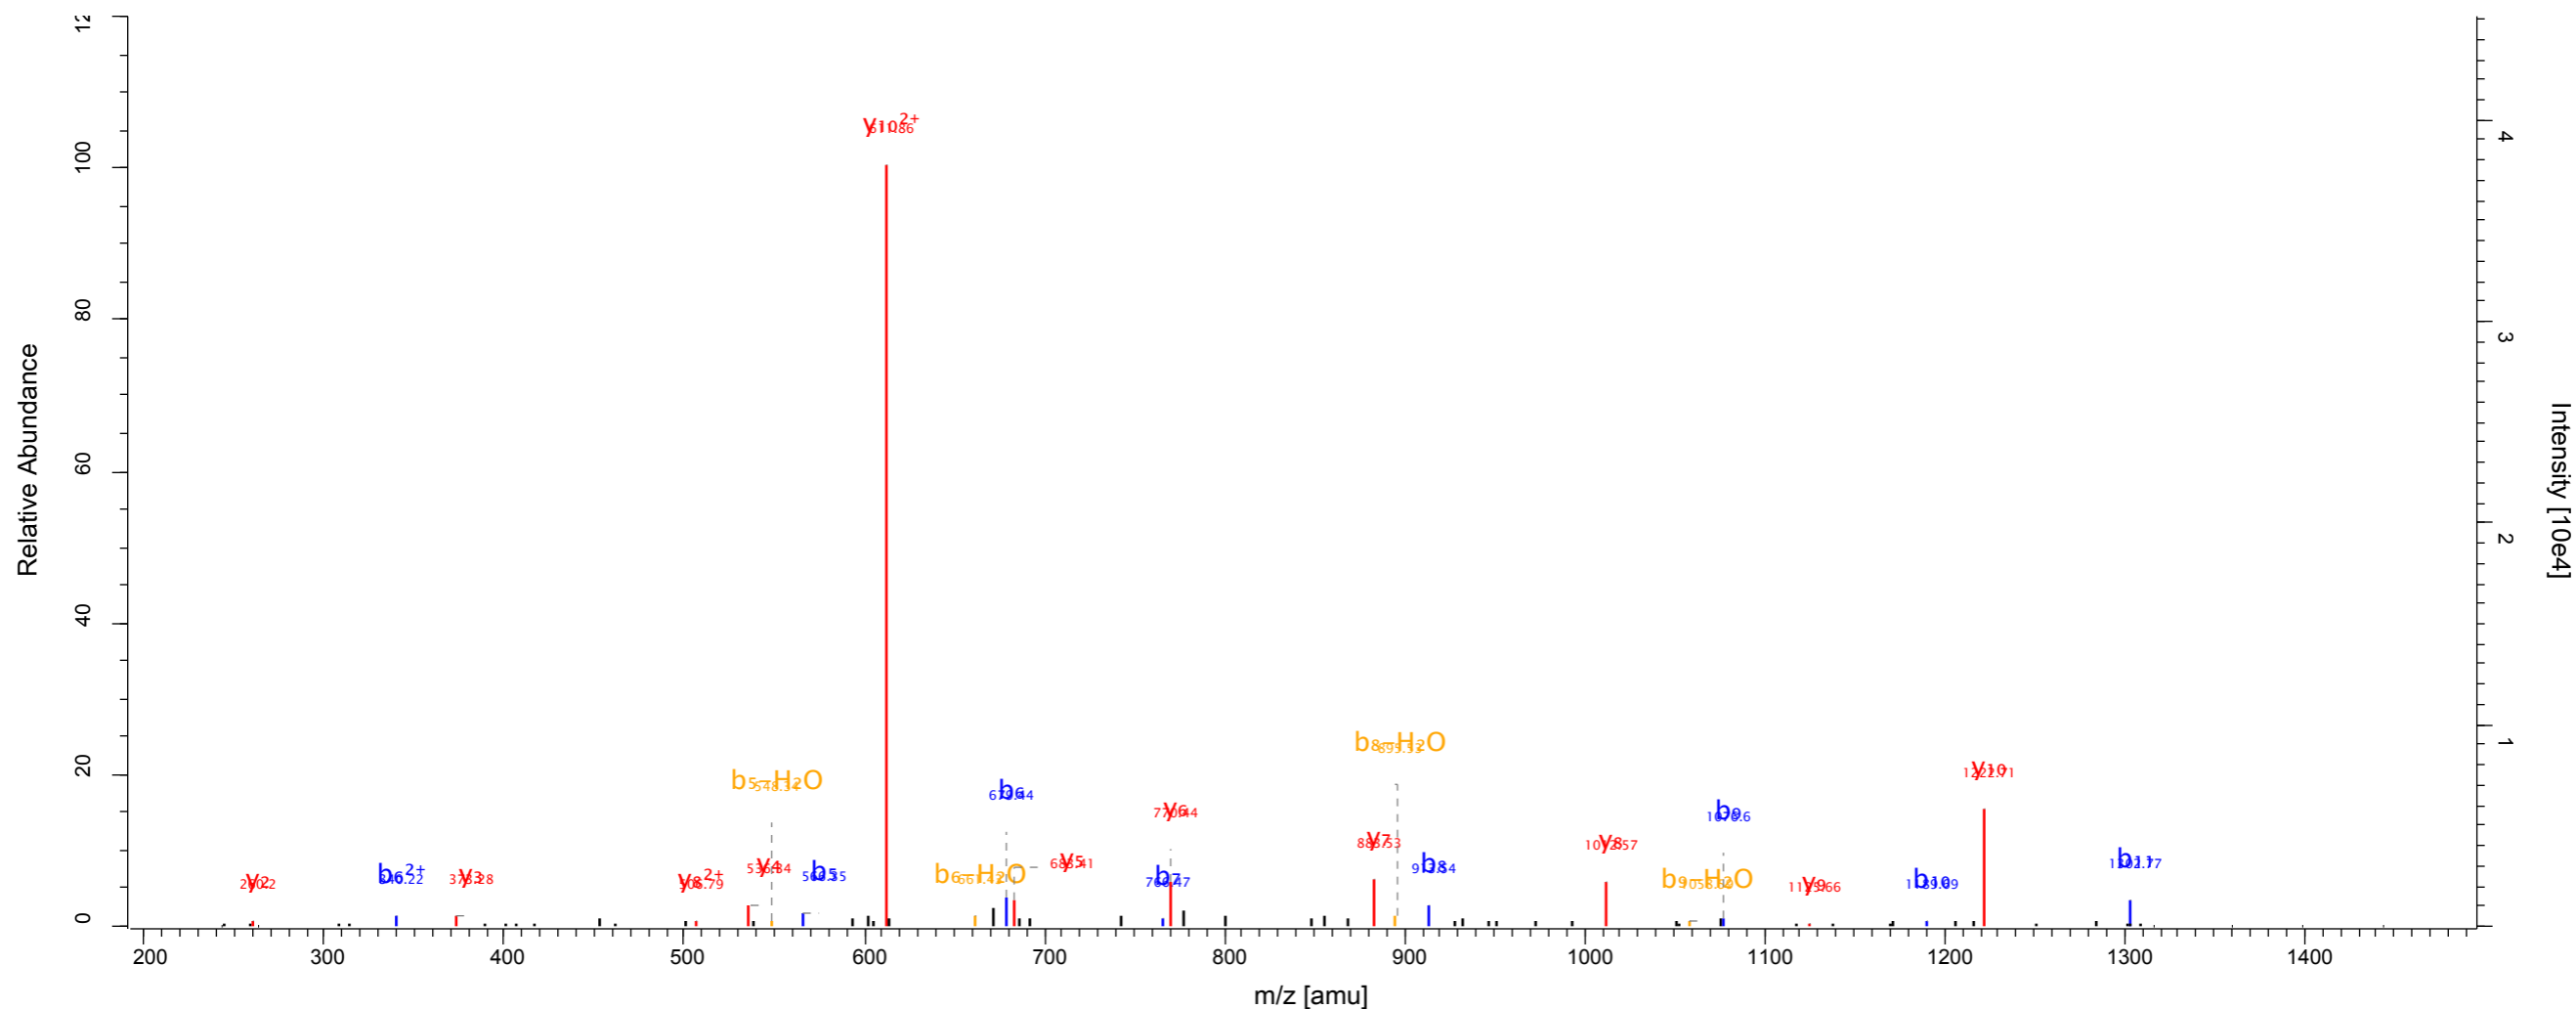

precursor information

|                   |                  |
|-------------------|------------------|
| Mass:             | 1447.86042       |
| m/z:              | 724.04100        |
| Charge:           | 2+               |
| Retention time:   | 118.274443054100 |
| Score:            | 164.6517         |
| Mass Error [ppm]: | 0.27317          |
| PEP:              | 1.5405E-05       |
| Precursor Type:   | ISO              |

general information

|                       |           |
|-----------------------|-----------|
| Annotation:           | 0 of 12   |
| AminoAcids Coverage:  | 75 %      |
| Intensity Coverage:   | 82 %      |
| Peak Coverage:        | 21 %      |
| Protein Localisation: | 59 ... 70 |

| b <sup>2+</sup> ion |              | b ion      |              |    |     |    | y ion        |            | y <sup>2+</sup> ion |            |
|---------------------|--------------|------------|--------------|----|-----|----|--------------|------------|---------------------|------------|
| Δ dalton            | mass         | Δ dalton   | mass         |    | seq |    | Δ dalton     | mass       | Δ dalton            | mass       |
|                     | 114.09134045 |            | 114.09134045 | 1  | I   | 11 |              |            |                     |            |
|                     | 227.17540443 |            | 227.17540443 | 2  | I   | 10 | 1335.7922519 |            | 1335.7922519        |            |
|                     | 324.22816828 |            | 324.22816828 | 3  | P   | 9  | 1222.7081879 | -0.2744721 | 611.85773219        | -0.0008596 |
|                     | 437.31223226 |            | 437.31223226 | 4  | I   | 8  | 1125.6554241 | +0.0198689 | 1125.6554241        |            |
|                     | 566.35482536 | +0.0361048 | 566.35482536 | 5  | E   | 7  | 1012.5713601 | -0.0906472 | 506.78931827        | +0.3962896 |
| -0.0661005          | 340.2230829  | -0.0798805 | 679.43888934 | 6  | I   | 6  | 883.52876698 | +0.0159718 | 883.52876698        |            |
|                     | 766.47091775 | +0.0700368 | 766.47091775 | 7  | S   | 5  | 770.444703   | +0.0093986 | 770.444703          |            |
|                     | 913.53933166 | -0.2685797 | 913.53933166 | 8  | F   | 4  | 683.41267459 | +0.0532068 | 683.41267459        |            |
|                     | 1076.6026602 | -0.0264883 | 1076.6026602 | 9  | Y   | 3  | 536.34426067 | -0.1046366 | 536.34426067        |            |
|                     | 1189.6867242 | -0.1109185 | 1189.6867242 | 10 | I   | 2  | 373.28093213 | +0.1111577 | 373.28093213        |            |
|                     | 1302.7707882 | -0.0472774 | 1302.7707882 | 11 | I   | 1  | 260.19686815 | +0.1483772 | 260.19686815        |            |
|                     |              |            |              | 12 | K   | 0  | 147.11280417 |            | 147.11280417        |            |

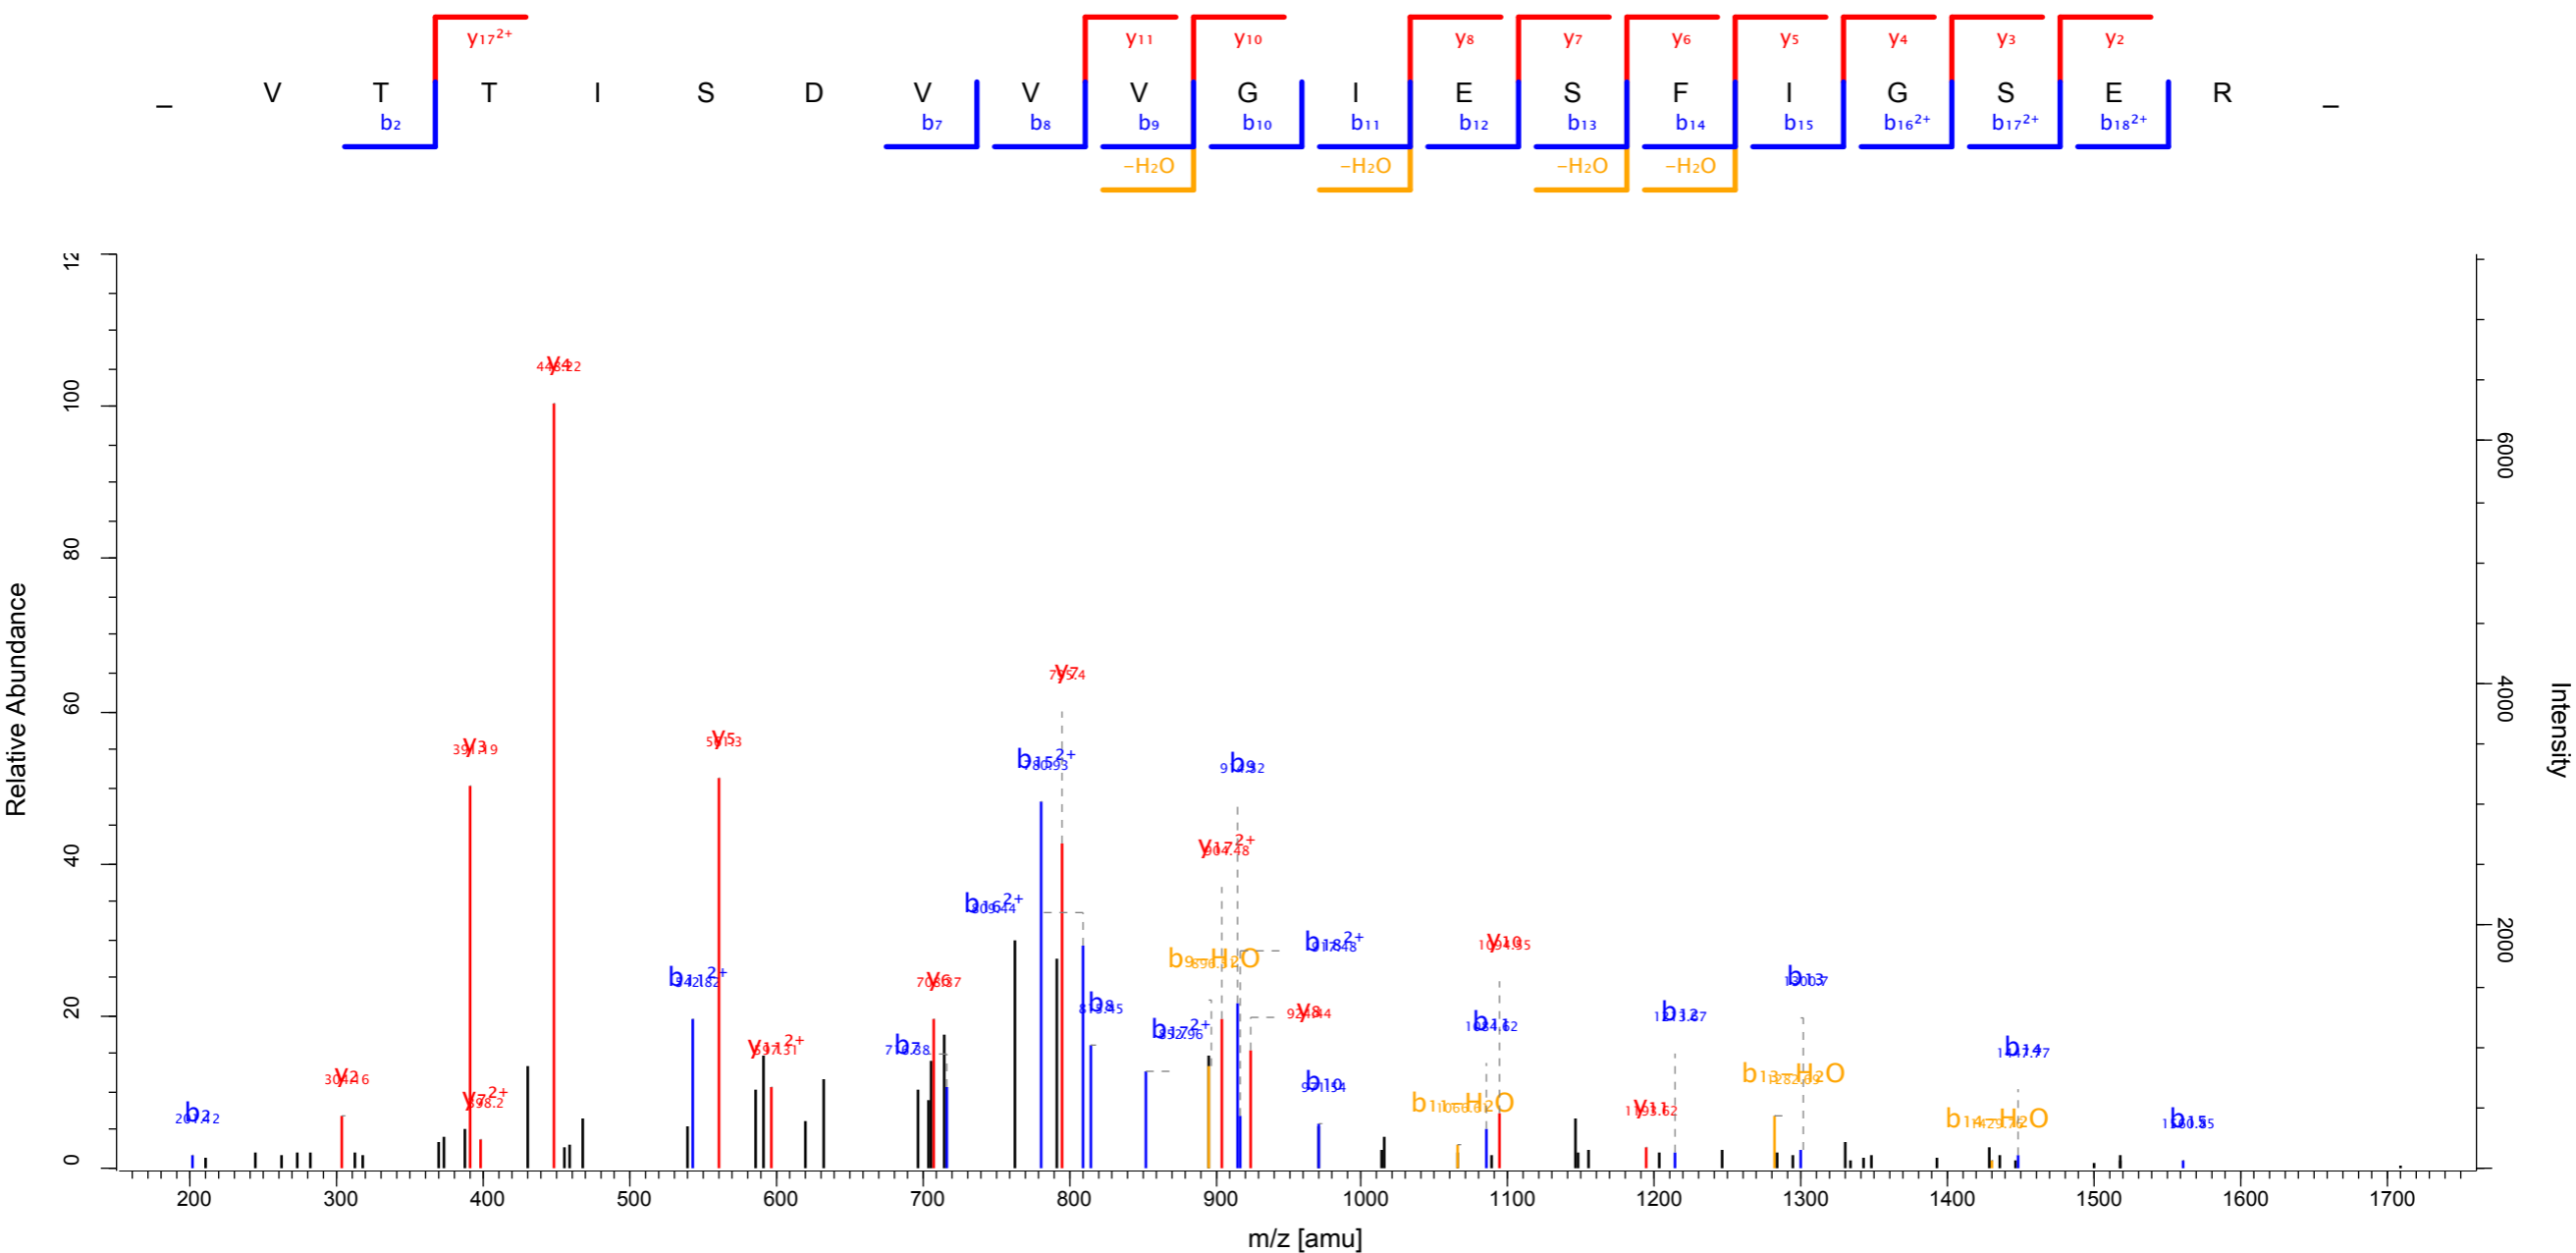

precursor information

|                   |                  |
|-------------------|------------------|
| Mass:             | 2007.05257       |
| m/z:              | 670.02512        |
| Charge:           | 2+               |
| RetentionTime:    | 120.760408046875 |
| Score:            | 160.2680         |
| Mass Error (ppm): | 0.5657           |
| DEP:              | 6.76425_22       |
| Precursor Type:   | MULTI            |

general information

|                       |             |
|-----------------------|-------------|
| Annotation:           | 14 of 19    |
| AminoAcids Coverage:  | 74%         |
| Intensity Coverage:   | 66%         |
| Peak Coverage:        | 28%         |
| Protein Localisation: | 317 ... 335 |

| b <sup>2+</sup> ion |              | b ion      |              |    |     |    | y ion        |            | y <sup>2+</sup> ion |            |
|---------------------|--------------|------------|--------------|----|-----|----|--------------|------------|---------------------|------------|
| Δ dalton            | mass         | Δ dalton   | mass         |    | seq |    | Δ dalton     | mass       | Δ dalton            | mass       |
|                     | 100.07569038 |            | 100.07569038 | 1  | V   | 18 |              |            |                     |            |
|                     | 201.12336886 | +0.0306228 | 201.12336886 | 2  | T   | 17 | 1908.9912986 |            | 1908.9912986        |            |
|                     | 302.17104733 |            | 302.17104733 | 3  | T   | 16 | 1807.9436202 |            | 904.47544831        | -0.2681119 |
|                     | 415.25511131 |            | 415.25511131 | 4  | I   | 15 | 1706.8959417 |            | 1706.8959417        |            |
|                     | 502.28713972 |            | 502.28713972 | 5  | S   | 14 | 1593.8118777 |            | 1593.8118777        |            |
|                     | 617.31408275 |            | 617.31408275 | 6  | D   | 13 | 1506.7798493 |            | 1506.7798493        |            |
|                     | 716.38249667 | -0.0576676 | 716.38249667 | 7  | V   | 12 | 1391.7529063 |            | 1391.7529063        |            |
|                     | 815.45091059 | -0.1388378 | 815.45091059 | 8  | V   | 11 | 1292.6844923 |            | 1292.6844923        |            |
|                     | 914.5193245  | -0.0915291 | 914.5193245  | 9  | V   | 10 | 1193.6160784 | -0.1452532 | 597.31167745        | +0.163115  |
|                     | 971.54078823 | -0.1145797 | 971.54078823 | 10 | G   | 9  | 1094.5476645 | -0.1934165 | 1094.5476645        |            |
| +0.1803346          | 542.81606434 | -0.3777819 | 1084.6248522 | 11 | I   | 8  | 1037.5262008 |            | 1037.5262008        |            |
|                     | 1213.6674453 | -0.2723037 | 1213.6674453 | 12 | E   | 7  | 924.44213681 | +0.0449848 | 924.44213681        |            |
|                     | 1300.6994737 | -0.1883653 | 1300.6994737 | 13 | S   | 6  | 795.39954372 | +0.0275193 | 398.20341009        | +0.2448321 |
|                     | 1447.7678876 | -0.2318769 | 1447.7678876 | 14 | F   | 5  | 708.36751531 | -0.0246808 | 708.36751531        |            |
| -0.1974973          | 780.92961404 | -0.39431   | 1560.8519516 | 15 | I   | 4  | 561.29910139 | -0.0433641 | 561.29910139        |            |
| -0.1615983          | 809.4403459  |            | 1617.8734153 | 16 | G   | 3  | 448.21503741 | +0.0439348 | 448.21503741        |            |
| -0.0228274          | 852.9563601  |            | 1704.9054437 | 17 | S   | 2  | 391.19357369 | +0.0688164 | 391.19357369        |            |
| +0.1196944          | 917.47765665 |            | 1833.9480368 | 18 | E   | 1  | 304.16154528 | -0.0696874 | 304.16154528        |            |
|                     |              |            |              | 19 | R   | 0  | 175.11895218 |            | 175.11895218        |            |

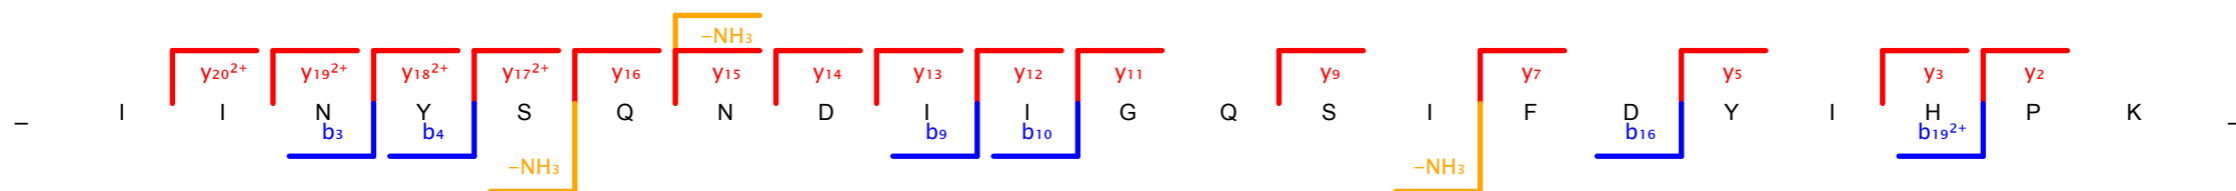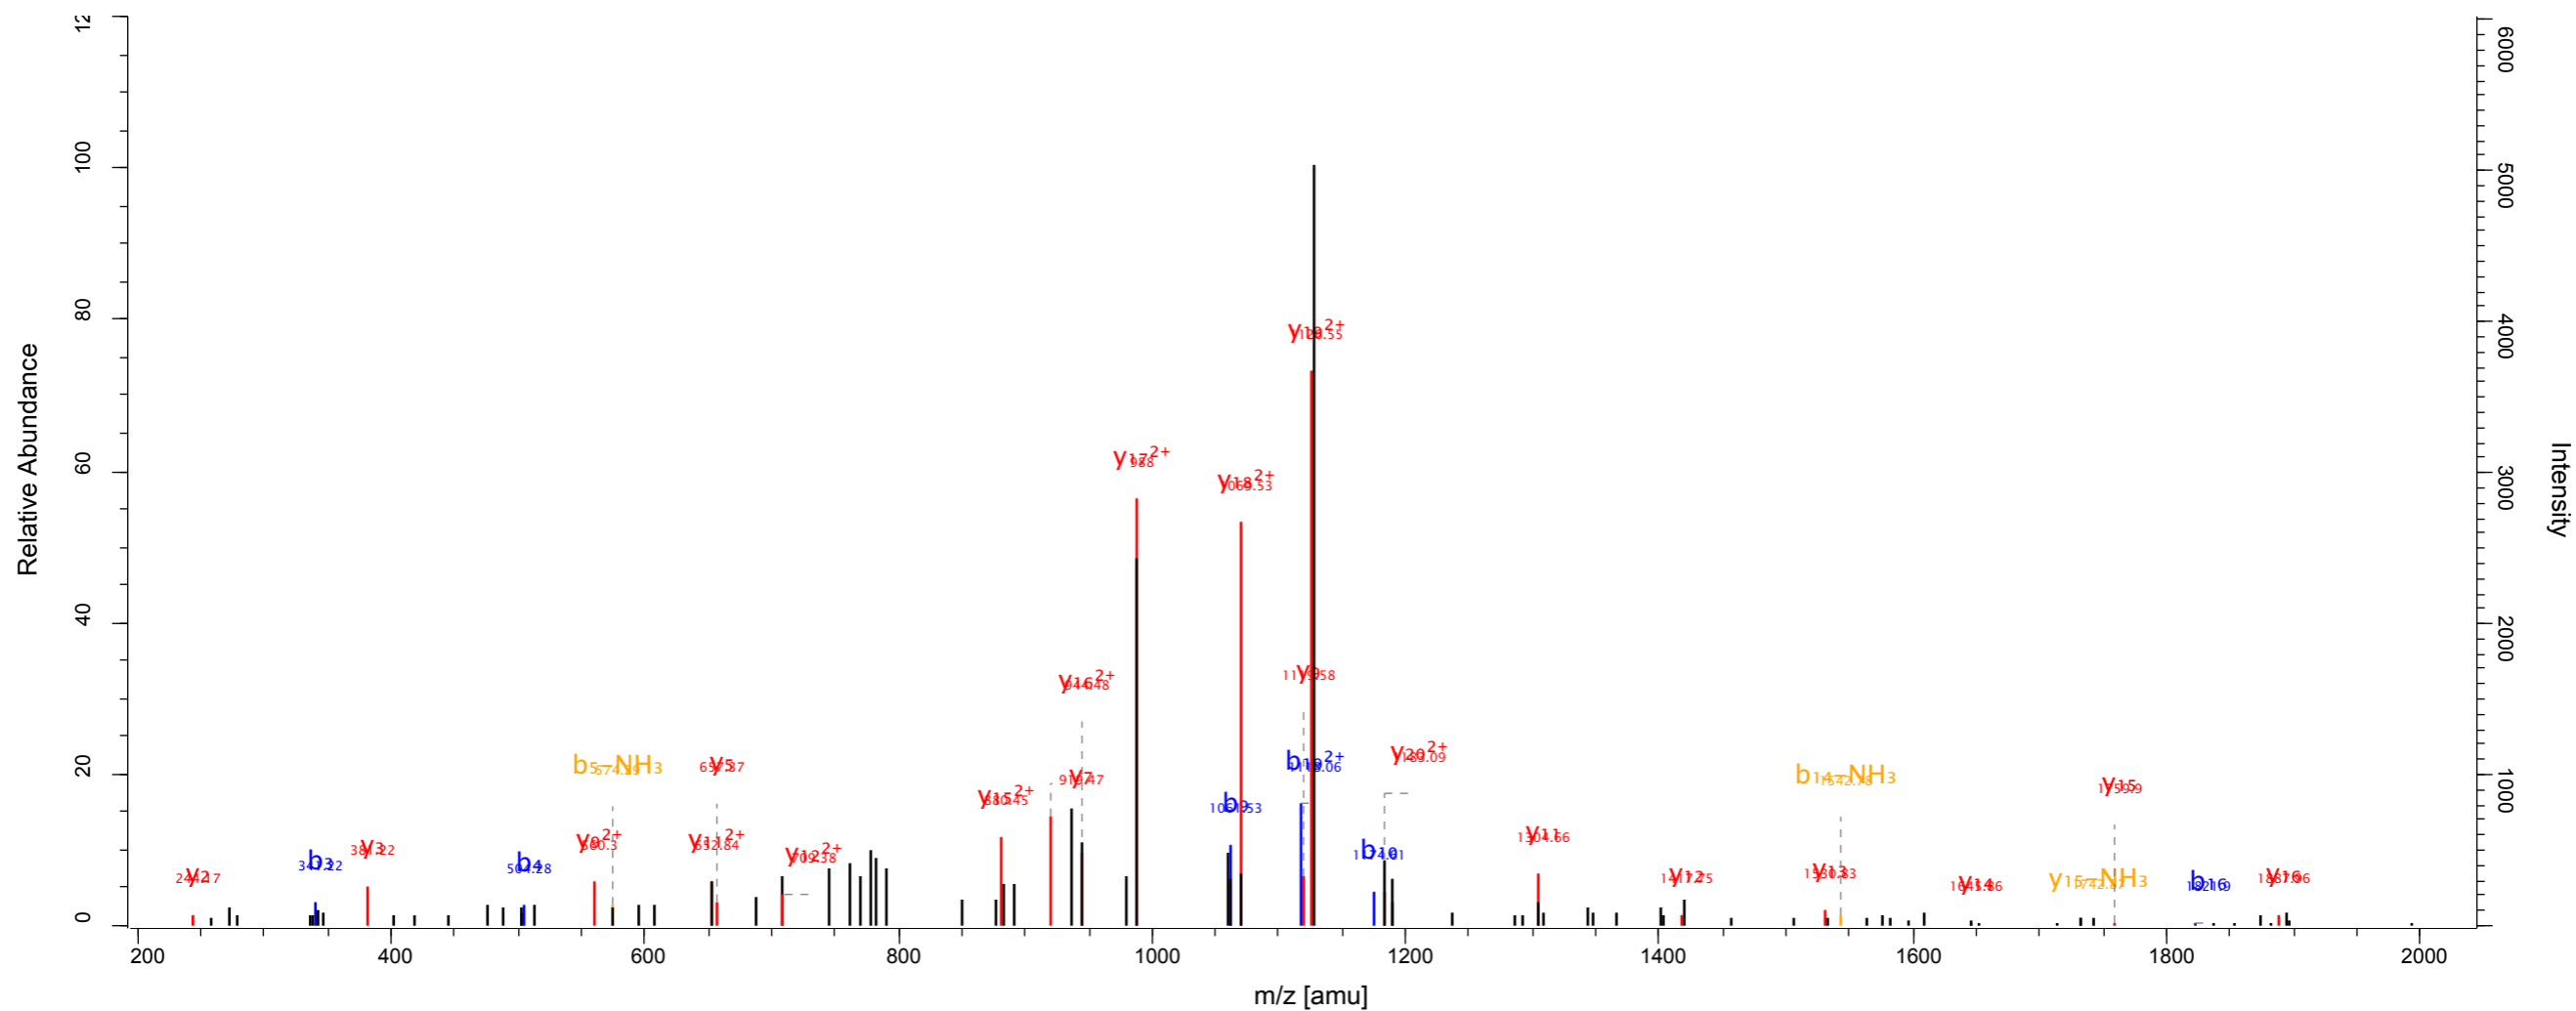

precursor information

|                   |                  |
|-------------------|------------------|
| Mass:             | 2477.25021       |
| m/z:              | 826.76028        |
| Charge:           | 2                |
| Potentialtime:    | 100.267202758780 |
| Score:            | 110.0757         |
| Mass Error (ppm): | 0.004740         |
| DEP:              | 2.076507         |
| Precursor Type:   | ISO              |

| b <sup>2+</sup> ion |              | b ion      |              |    |     |    | y ion        |            | y <sup>2+</sup> ion |            |
|---------------------|--------------|------------|--------------|----|-----|----|--------------|------------|---------------------|------------|
| Δ dalton            | mass         | Δ dalton   | mass         |    | seq |    | Δ dalton     | mass       | Δ dalton            | mass       |
|                     | 114.09134045 |            | 114.09134045 | 1  | I   | 20 |              |            |                     |            |
|                     | 227.17540443 |            | 227.17540443 | 2  | I   | 19 | 2365.1822873 |            | 1183.0947819        | -0.0266667 |
|                     | 341.21833187 | -0.0348602 | 341.21833187 | 3  | N   | 18 | 2252.0982233 |            | 1126.5527499        | -0.1215976 |
|                     | 504.28166041 | -0.1900466 | 504.28166041 | 4  | Y   | 17 | 2138.0552959 |            | 1069.5312862        | +0.1715947 |
|                     | 591.31368882 |            | 591.31368882 | 5  | S   | 16 | 1974.9919673 |            | 987.9996219         | +0.0235715 |
|                     | 719.37226633 |            | 719.37226633 | 6  | Q   | 15 | 1887.9599389 | -0.2476587 | 944.4836077         | -0.0393328 |
|                     | 833.41519378 |            | 833.41519378 | 7  | N   | 14 | 1759.9013614 | -0.2349796 | 880.45431894        | +0.1648827 |
|                     | 948.44213681 |            | 948.44213681 | 8  | D   | 13 | 1645.858434  | -0.436681  | 1645.858434         |            |
|                     | 1061.5262008 | +0.0505814 | 1061.5262008 | 9  | I   | 12 | 1530.8314909 | +0.0896516 | 1530.8314909        |            |
|                     | 1174.6102648 | -0.2023058 | 1174.6102648 | 10 | I   | 11 | 1417.747427  | +0.1635838 | 709.37735171        | -0.4877643 |
|                     | 1231.6317285 |            | 1231.6317285 | 11 | G   | 10 | 1304.663363  | -0.1133141 | 652.83531972        | -0.1613085 |
|                     | 1359.690306  |            | 1359.690306  | 12 | Q   | 9  | 1247.6418993 |            | 1247.6418993        |            |
|                     | 1446.7223344 |            | 1446.7223344 | 13 | S   | 8  | 1119.5833217 | -0.2175991 | 560.2952991         | +0.0025525 |
|                     | 1559.8063984 |            | 1559.8063984 | 14 | I   | 7  | 1032.5512933 |            | 1032.5512933        |            |
|                     | 1706.8748123 |            | 1706.8748123 | 15 | F   | 6  | 919.46722935 | -0.1574759 | 919.46722935        |            |
|                     | 1821.9017553 | -0.01052   | 1821.9017553 | 16 | D   | 5  | 772.39881544 |            | 772.39881544        |            |
|                     | 1984.9650839 |            | 1984.9650839 | 17 | Y   | 4  | 657.3718724  | +0.0039211 | 657.3718724         |            |
|                     | 2098.0491479 |            | 2098.0491479 | 18 | I   | 3  | 494.30854387 |            | 494.30854387        |            |
| +0.2868143          | 1118.0576681 |            | 2235.1080597 | 19 | H   | 2  | 381.22447988 | -0.0540392 | 381.22447988        |            |
|                     | 2332.1608236 |            | 2332.1608236 | 20 | P   | 1  | 244.16556802 | +0.0218709 | 244.16556802        |            |
|                     |              |            |              | 21 | K   | 0  | 147.11280417 |            | 147.11280417        |            |

general information

|                       |             |
|-----------------------|-------------|
| Annotation:           | 17 of 21    |
| AminoAcids Coverage:  | 81 %        |
| Intensity Coverage:   | 45 %        |
| Peak Coverage:        | 28 %        |
| Protein Localisation: | 179 ... 199 |

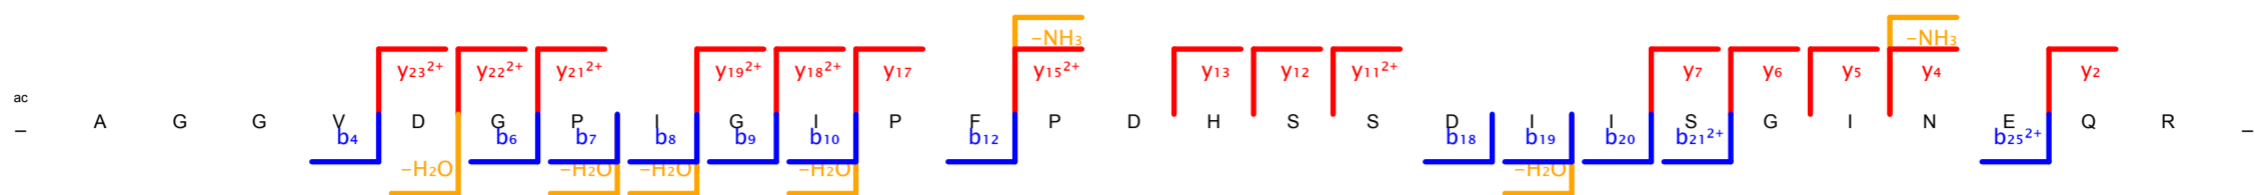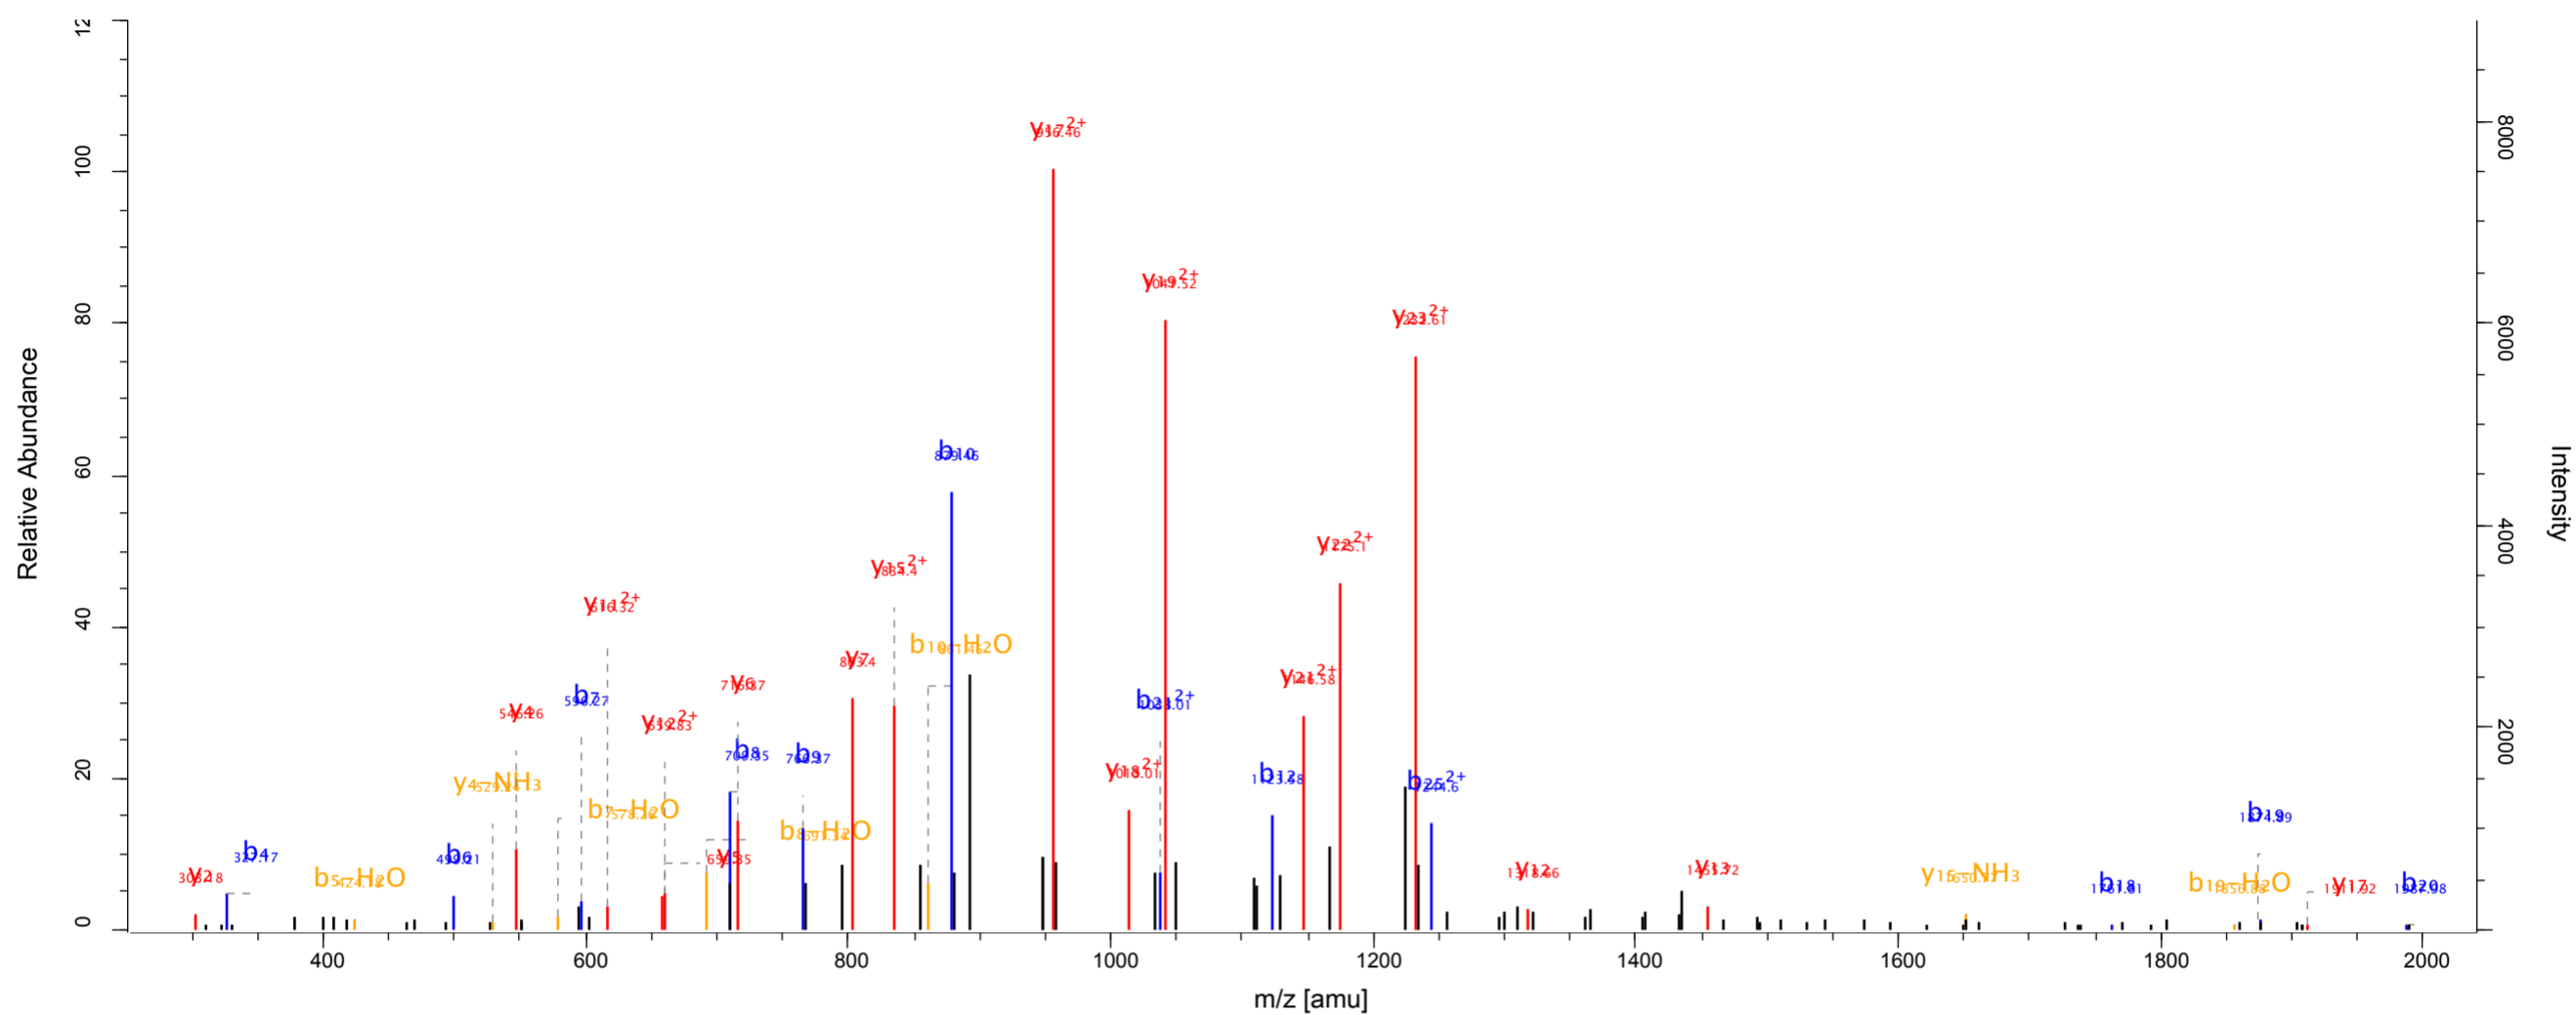

precursor information

|                   |                  |
|-------------------|------------------|
| Mass:             | 2780.26162       |
| m/z:              | 1030.70448       |
| Charge:           | 2+               |
| Retention time:   | 11.2482551025201 |
| Score:            | 154.9418         |
| Mass Error (ppm): | 0.14787          |
| DEP:              | 2.42585_28       |
| Precursor Type:   | ISO              |

| b <sup>2+</sup> ion |              | b ion      |              |    |     |    | y ion        |            | y <sup>2+</sup> ion |            |
|---------------------|--------------|------------|--------------|----|-----|----|--------------|------------|---------------------|------------|
| Δ dalton            | mass         | Δ dalton   | mass         |    | seq |    | Δ dalton     | mass       | Δ dalton            | mass       |
|                     | 114.05495494 |            | 114.05495494 | 1  | A   | 26 |              |            |                     |            |
|                     | 171.07641866 |            | 171.07641866 | 2  | G   | 25 | 2677.3216343 |            | 2677.3216343        |            |
|                     | 228.09788239 |            | 228.09788239 | 3  | G   | 24 | 2620.3001706 |            | 2620.3001706        |            |
|                     | 327.1662963  | -0.0167602 | 327.1662963  | 4  | V   | 23 | 2563.2787069 |            | 2563.2787069        |            |
|                     | 442.19323934 |            | 442.19323934 | 5  | D   | 22 | 2464.210293  |            | 1232.6087847        | +0.2127485 |
|                     | 499.21470306 | -0.2193417 | 499.21470306 | 6  | G   | 21 | 2349.1833499 |            | 1175.0953132        | +0.2552727 |
|                     | 596.26746691 | -0.0777086 | 596.26746691 | 7  | P   | 20 | 2292.1618862 |            | 1146.5845813        | +0.2028942 |
|                     | 709.35153089 | -0.2129201 | 709.35153089 | 8  | I   | 19 | 2195.1091224 |            | 2195.1091224        |            |
|                     | 766.37299462 | -0.0414516 | 766.37299462 | 9  | G   | 18 | 2082.0250584 |            | 1041.5161674        | +0.1897652 |
|                     | 879.4570586  | -0.2608306 | 879.4570586  | 10 | I   | 17 | 2025.0035947 |            | 1013.0054356        | +0.1984219 |
|                     | 976.50982245 |            | 976.50982245 | 11 | P   | 16 | 1911.9195307 | +0.3678228 | 956.46340357        | +0.1066038 |
|                     | 1123.5782364 | -0.25475   | 1123.5782364 | 12 | F   | 15 | 1814.8667668 |            | 1814.8667668        |            |
|                     | 1220.6310002 |            | 1220.6310002 | 13 | P   | 14 | 1667.7983529 |            | 834.40281469        | +0.278948  |
|                     | 1335.6579432 |            | 1335.6579432 | 14 | D   | 13 | 1570.7455891 |            | 1570.7455891        |            |
|                     | 1472.7168551 |            | 1472.7168551 | 15 | H   | 12 | 1455.718646  | -0.2035093 | 1455.718646         |            |
|                     | 1559.7488835 |            | 1559.7488835 | 16 | S   | 11 | 1318.6597342 | -0.0775808 | 659.83350531        | -0.0947968 |
|                     | 1646.7809119 |            | 1646.7809119 | 17 | S   | 10 | 1231.6277058 |            | 616.31749111        | -0.1277328 |
|                     | 1761.807855  | -0.0122007 | 1761.807855  | 18 | D   | 9  | 1144.5956773 |            | 1144.5956773        |            |
|                     | 1874.8919189 | +0.1527588 | 1874.8919189 | 19 | I   | 8  | 1029.5687343 |            | 1029.5687343        |            |
|                     | 1987.9759829 | -0.2778628 | 1987.9759829 | 20 | I   | 7  | 916.48467033 |            | 916.48467033        |            |
| +0.3197487          | 1038.0076439 |            | 2075.0080113 | 21 | S   | 6  | 803.40060635 | +0.0516031 | 803.40060635        |            |
|                     | 2132.0294751 |            | 2132.0294751 | 22 | G   | 5  | 716.36857794 | +0.0429211 | 716.36857794        |            |
|                     | 2245.113539  |            | 2245.113539  | 23 | I   | 4  | 659.34711422 | -0.353706  | 659.34711422        |            |
|                     | 2359.1564665 |            | 2359.1564665 | 24 | N   | 3  | 546.26305024 | +0.0991934 | 546.26305024        |            |
| +0.1038632          | 1244.603168  |            | 2488.1990596 | 25 | E   | 2  | 432.22012279 |            | 432.22012279        |            |
|                     | 2616.2576371 |            | 2616.2576371 | 26 | Q   | 1  | 303.17752969 | -0.1451811 | 303.17752969        |            |
|                     |              |            |              | 27 | R   | 0  | 175.11895218 |            | 175.11895218        |            |

general information

|                       |          |
|-----------------------|----------|
| Annotation:           | 22 of 27 |
| AminoAcids Coverage:  | 81 %     |
| Intensity Coverage:   | 71 %     |
| Peak Coverage:        | 25 %     |
| Protein Localisation: | 2 ... 28 |

Scan number 2185 Raw file 2091019\_Orbi6\_MaHe\_SA\_ADH\_exp3\_12h\_Gel14  
 Method ITMS; CID Genenames KRTAP1-1;KRTAP1-3;KRTAP1-5;KRTAP1-4

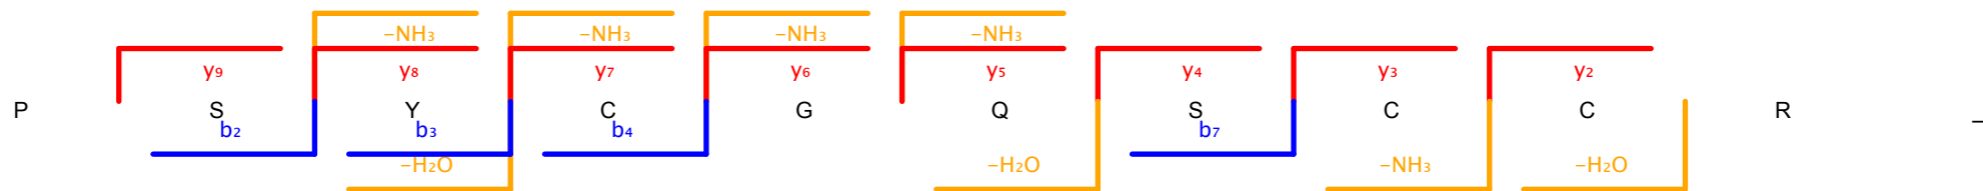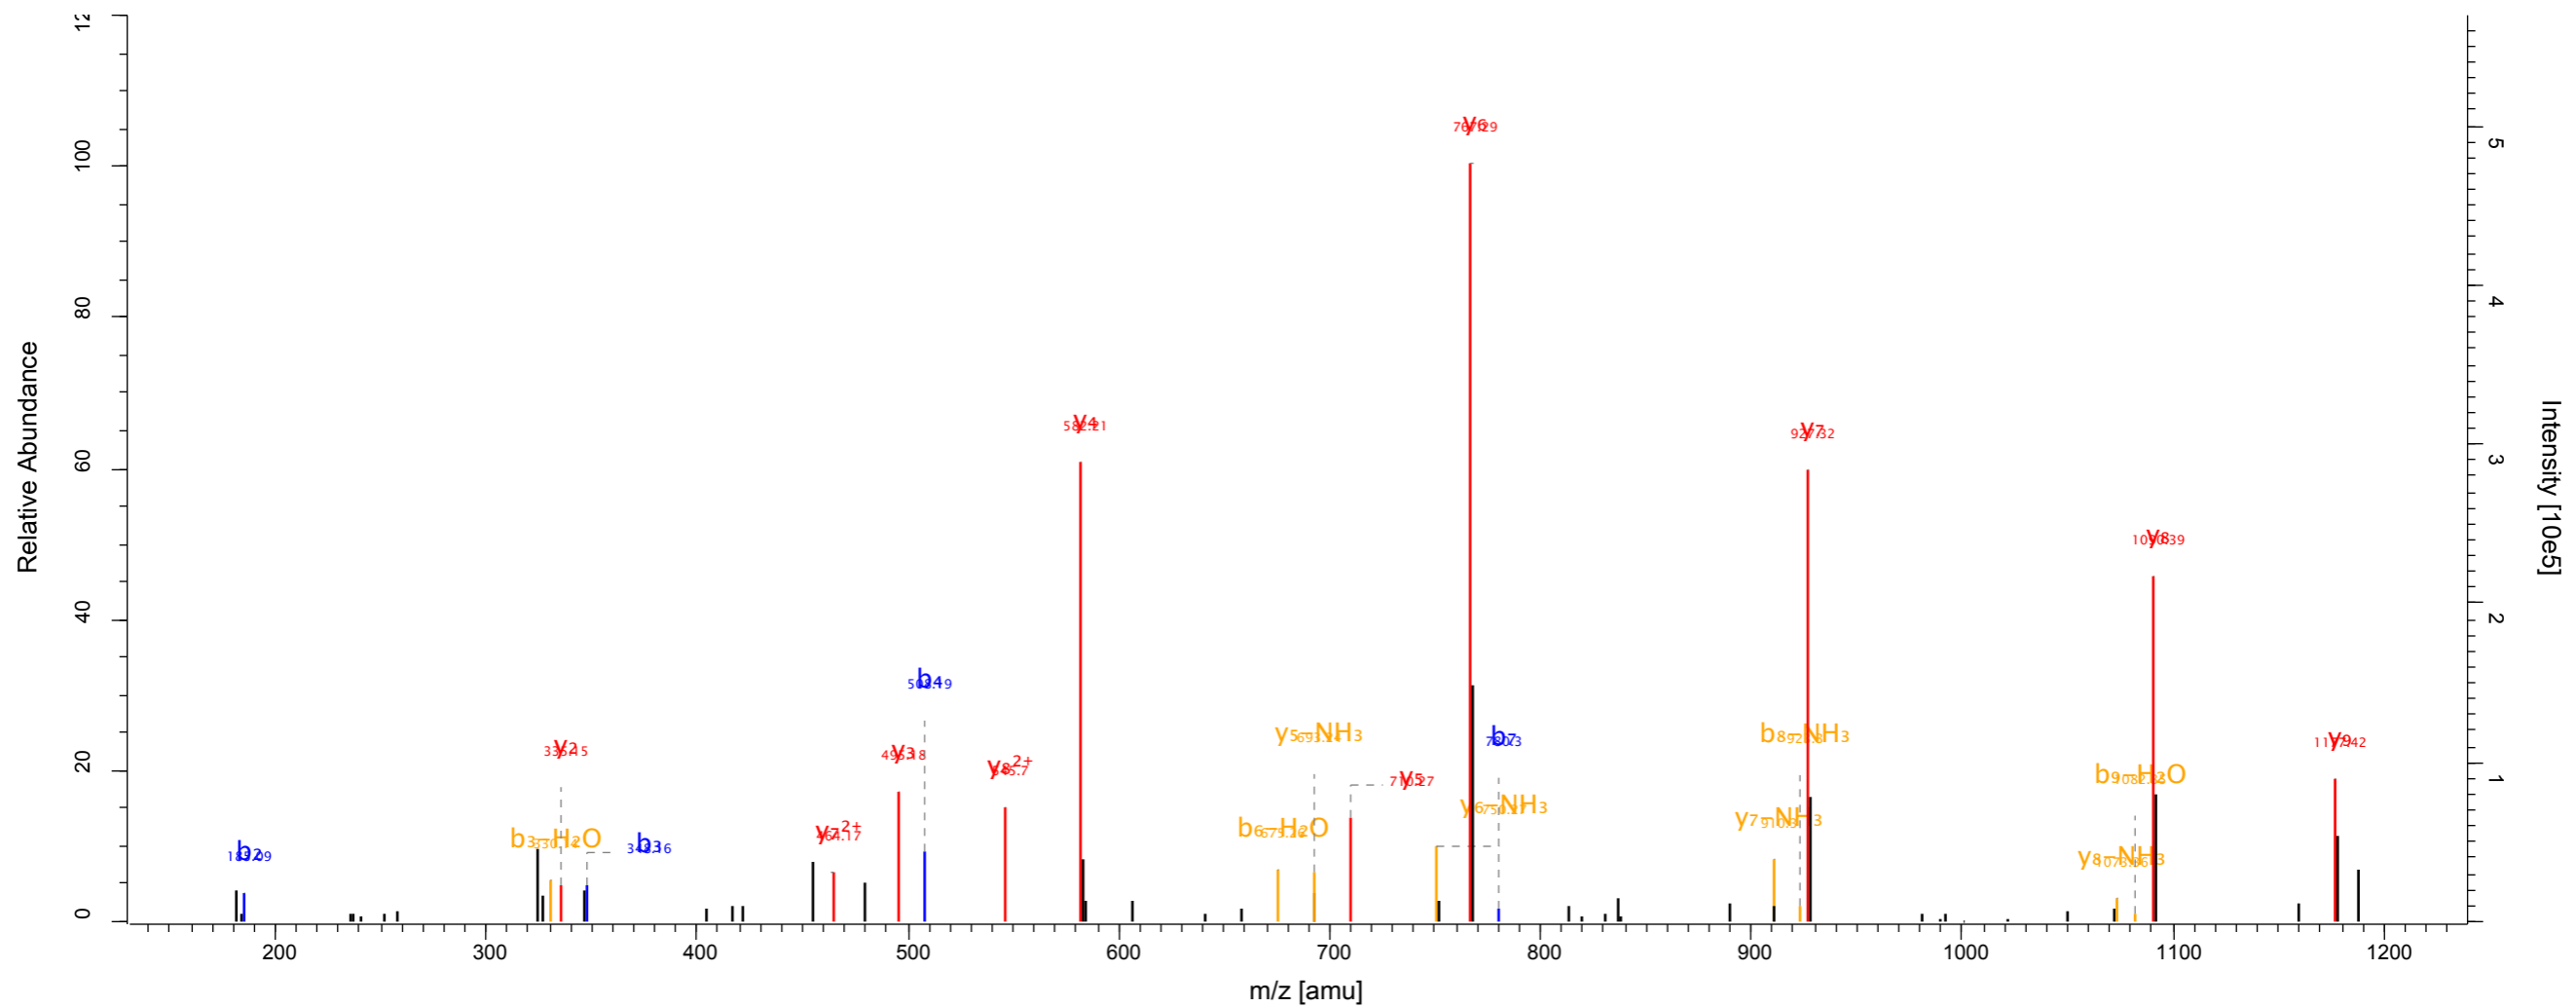

precursor information

|                   |                  |
|-------------------|------------------|
| Mass:             | 1272.46157       |
| m/z:              | 637.73806        |
| Charge:           | 2+               |
| Retention time:   | 20.0628414154053 |
| Score:            | 155.4204         |
| Mass Error (ppm): | -1.7584          |
| DEP:              | 0.0002007        |

96 Precursor Type: ISO

information

|                       |             |
|-----------------------|-------------|
| Annotation:           | 8 of 10     |
| AminoAcids Coverage:  | 80%         |
| Intensity Coverage:   | 70%         |
| Peak Coverage:        | 34%         |
| Protein Localisation: | 156 ... 165 |

| b ion      |                |    |     |   | y ion          |            | y <sup>2+</sup> ion |            |
|------------|----------------|----|-----|---|----------------|------------|---------------------|------------|
| Δ dalton   | mass           |    | seq |   | Δ dalton       | mass       | Δ dalton            | mass       |
|            | 98.060040319   | 1  | P   | 9 |                |            |                     |            |
| +0.1286039 | 185.092068728  | 2  | S   | 8 | 1177.418323378 | -0.183216  | 1177.418323378      |            |
| -0.0275896 | 348.155397267  | 3  | Y   | 7 | 1090.386294968 | -0.0897862 | 545.696785718       | +0.3048012 |
| +0.0399677 | 508.186045468  | 4  | C   | 6 | 927.32296643   | -0.0978688 | 464.165121448       | +0.2620636 |
|            | 565.207509192  | 5  | G   | 5 | 767.292318229  | -0.047079  | 767.292318229       |            |
|            | 693.266086703  | 6  | Q   | 4 | 710.270854505  | -0.0030933 | 710.270854505       |            |
| -0.0957225 | 780.298115113  | 7  | S   | 3 | 582.212276994  | +0.0214877 | 582.212276994       |            |
|            | 940.328763315  | 8  | C   | 2 | 495.180248584  | +0.0004765 | 495.180248584       |            |
|            | 1100.359411516 | 9  | C   | 1 | 335.149600382  | +0.0334135 | 335.149600382       |            |
|            |                | 10 | R   | 0 | 175.118952181  |            | 175.118952181       |            |



Scan number 2420 Raw file 20091019\_Orbi6\_MaHe\_SA\_ADH\_exp3\_12h\_Gel14  
 Method ITMS; CID Genenames KRTAP11-1

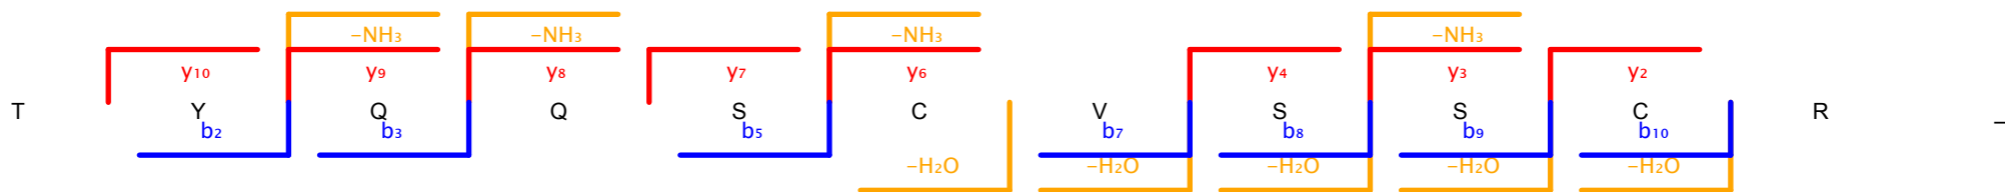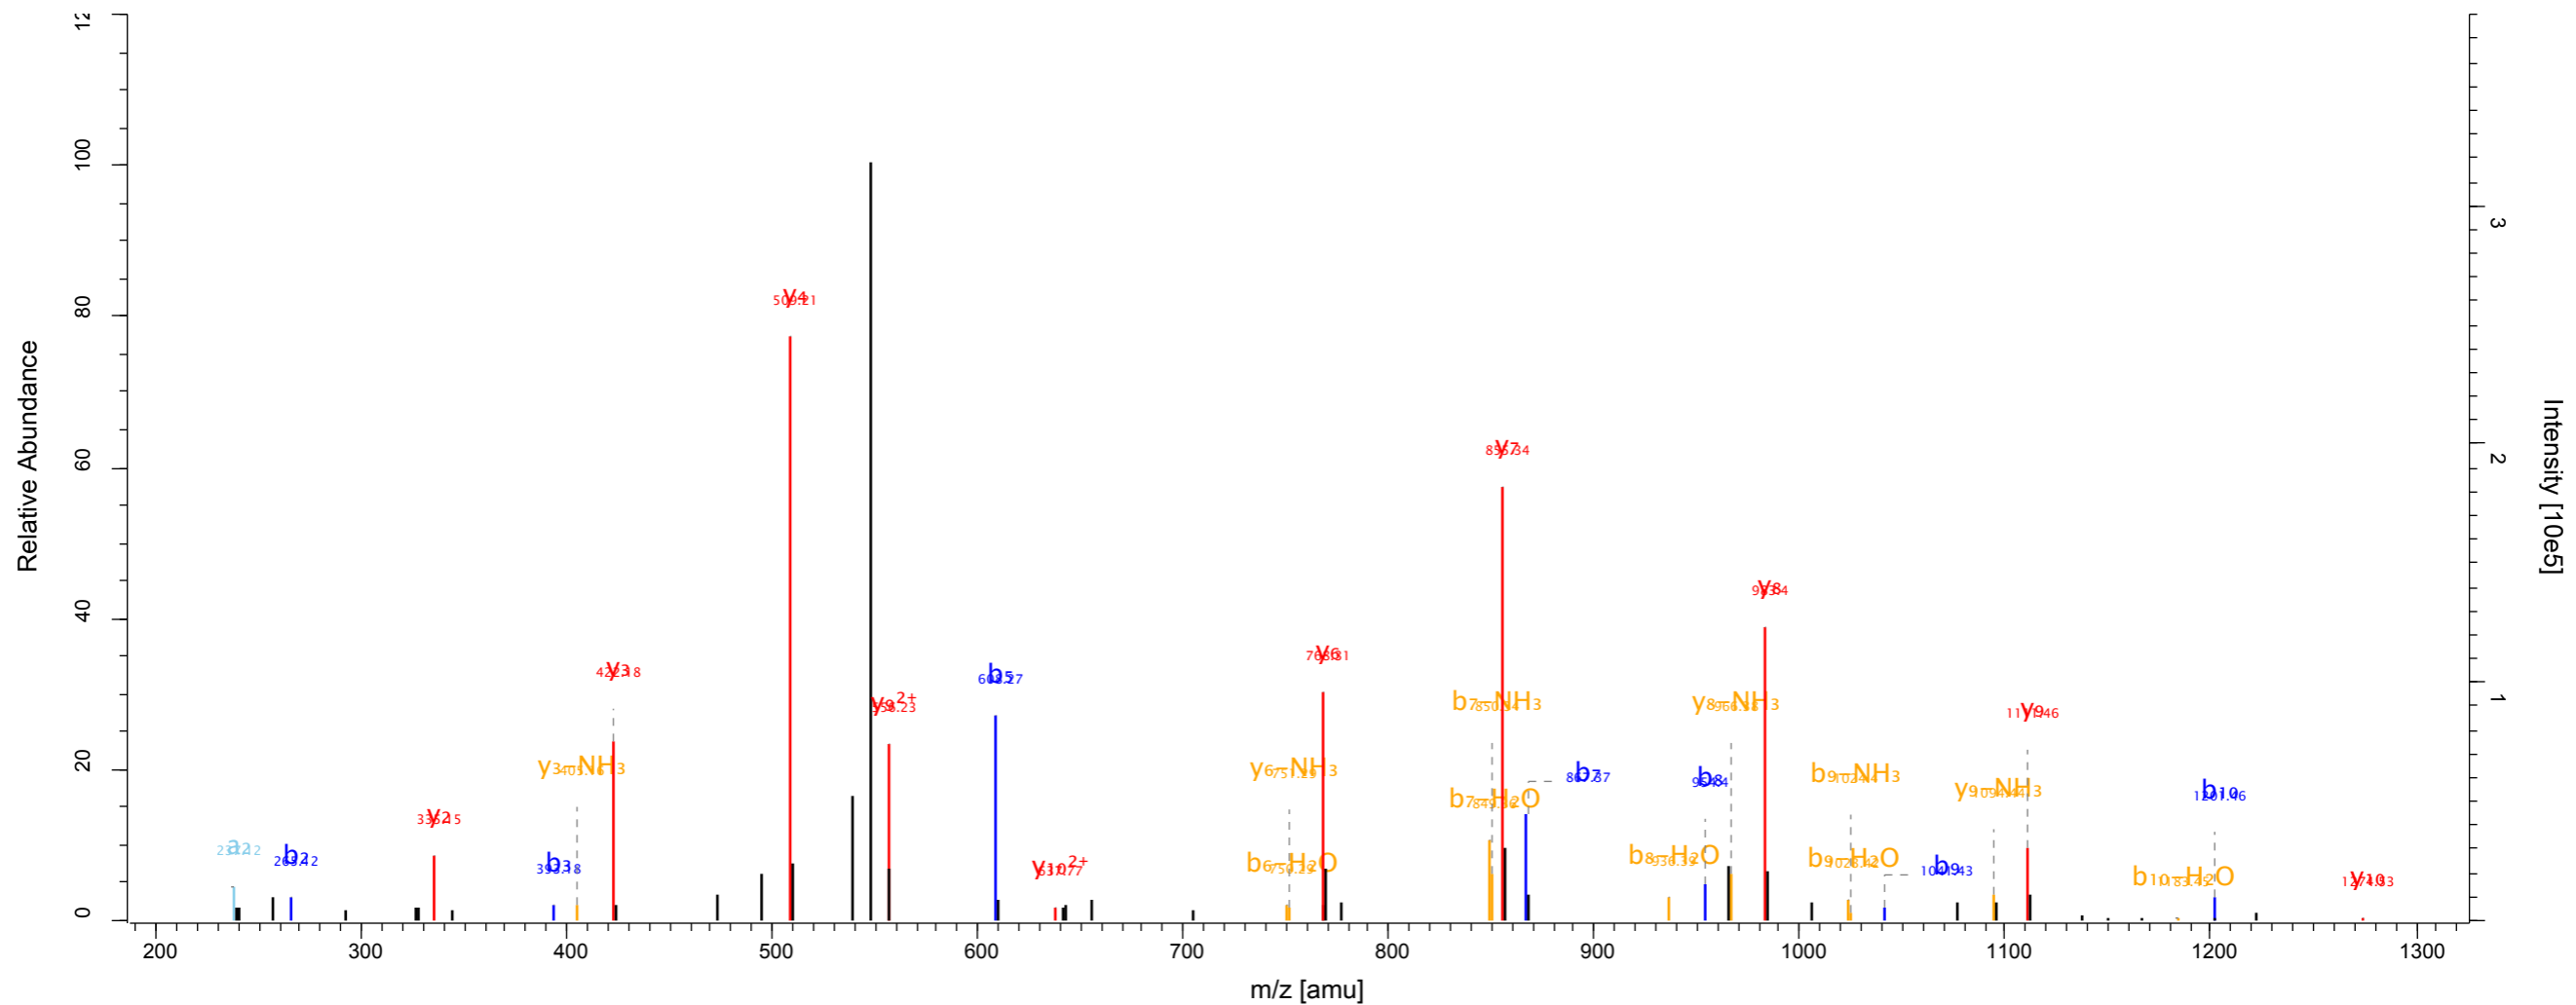

precursor information

|                   |                  |
|-------------------|------------------|
| Mass:             | 1274.56107       |
| m/z:              | 688.28076        |
| Charge:           | 2+               |
| Retention time:   | 21.2701700801688 |
| Score:            | 208.5561         |
| Mass Error (ppm): | -0.17078         |
| PEP:              | 1.0486E-06       |
| Precursor Type:   | ISO              |

general information

|                       |             |
|-----------------------|-------------|
| Annotation:           | 9 of 11     |
| AminoAcids Coverage:  | 82 %        |
| Intensity Coverage:   | 63 %        |
| Peak Coverage:        | 15 %        |
| Protein Localisation: | 150 ... 160 |

| a ion     |              | b ion      |              |    |     |    | y ion        |            | y <sup>2+</sup> ion |            |
|-----------|--------------|------------|--------------|----|-----|----|--------------|------------|---------------------|------------|
| Δ dalton  | mass         | Δ dalton   | mass         |    | seq |    | Δ dalton     | mass       | Δ dalton            | mass       |
|           | 74.060040319 |            | 102.05495494 | 1  | T   | 10 |              |            |                     |            |
| +0.113417 | 237.12336886 | -0.0486118 | 265.11828348 | 2  | Y   | 9  | 1274.5252313 | +0.1421271 | 637.76625388        | +0.0731626 |
|           | 365.18194637 | +0.1309393 | 393.17686099 | 3  | Q   | 8  | 1111.4619028 | -0.0479623 | 556.23458961        | -0.0383616 |
|           | 493.24052388 |            | 521.2354385  | 4  | Q   | 7  | 983.40332524 | -0.1931812 | 983.40332524        |            |
|           | 580.27255229 | -0.0082506 | 608.26746691 | 5  | S   | 6  | 855.34474773 | -0.0113127 | 855.34474773        |            |
|           | 740.30320049 |            | 768.29811511 | 6  | C   | 5  | 768.31271932 | +0.0846806 | 768.31271932        |            |
|           | 839.37161441 | -0.1414314 | 867.36652903 | 7  | V   | 4  | 608.28207112 |            | 608.28207112        |            |
|           | 926.40364282 | -0.1317728 | 954.39855744 | 8  | S   | 3  | 509.2136572  | -0.0503882 | 509.2136572         |            |
|           | 1013.4356712 | -0.1554394 | 1041.4305858 | 9  | S   | 2  | 422.18162879 | +0.0955929 | 422.18162879        |            |
|           | 1173.4663194 | -0.0846471 | 1201.4612341 | 10 | C   | 1  | 335.14960038 | +0.1316496 | 335.14960038        |            |
|           |              |            |              | 11 | R   | 0  | 175.11895218 |            | 175.11895218        |            |

Scan number 5866 Raw file 20091019\_Orbi6\_MaHe\_SA\_ADH\_exp3\_12h\_Gel14  
 Method ITMS; CID Genenames KRTAP13-2;KRTAP13-1

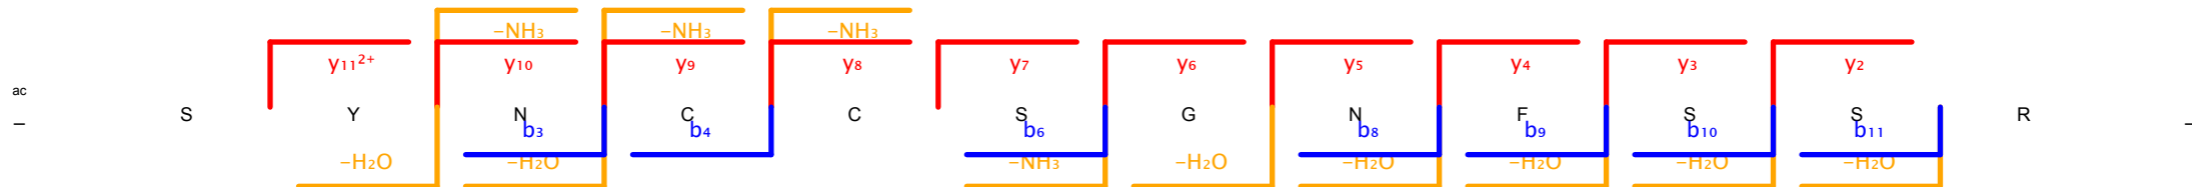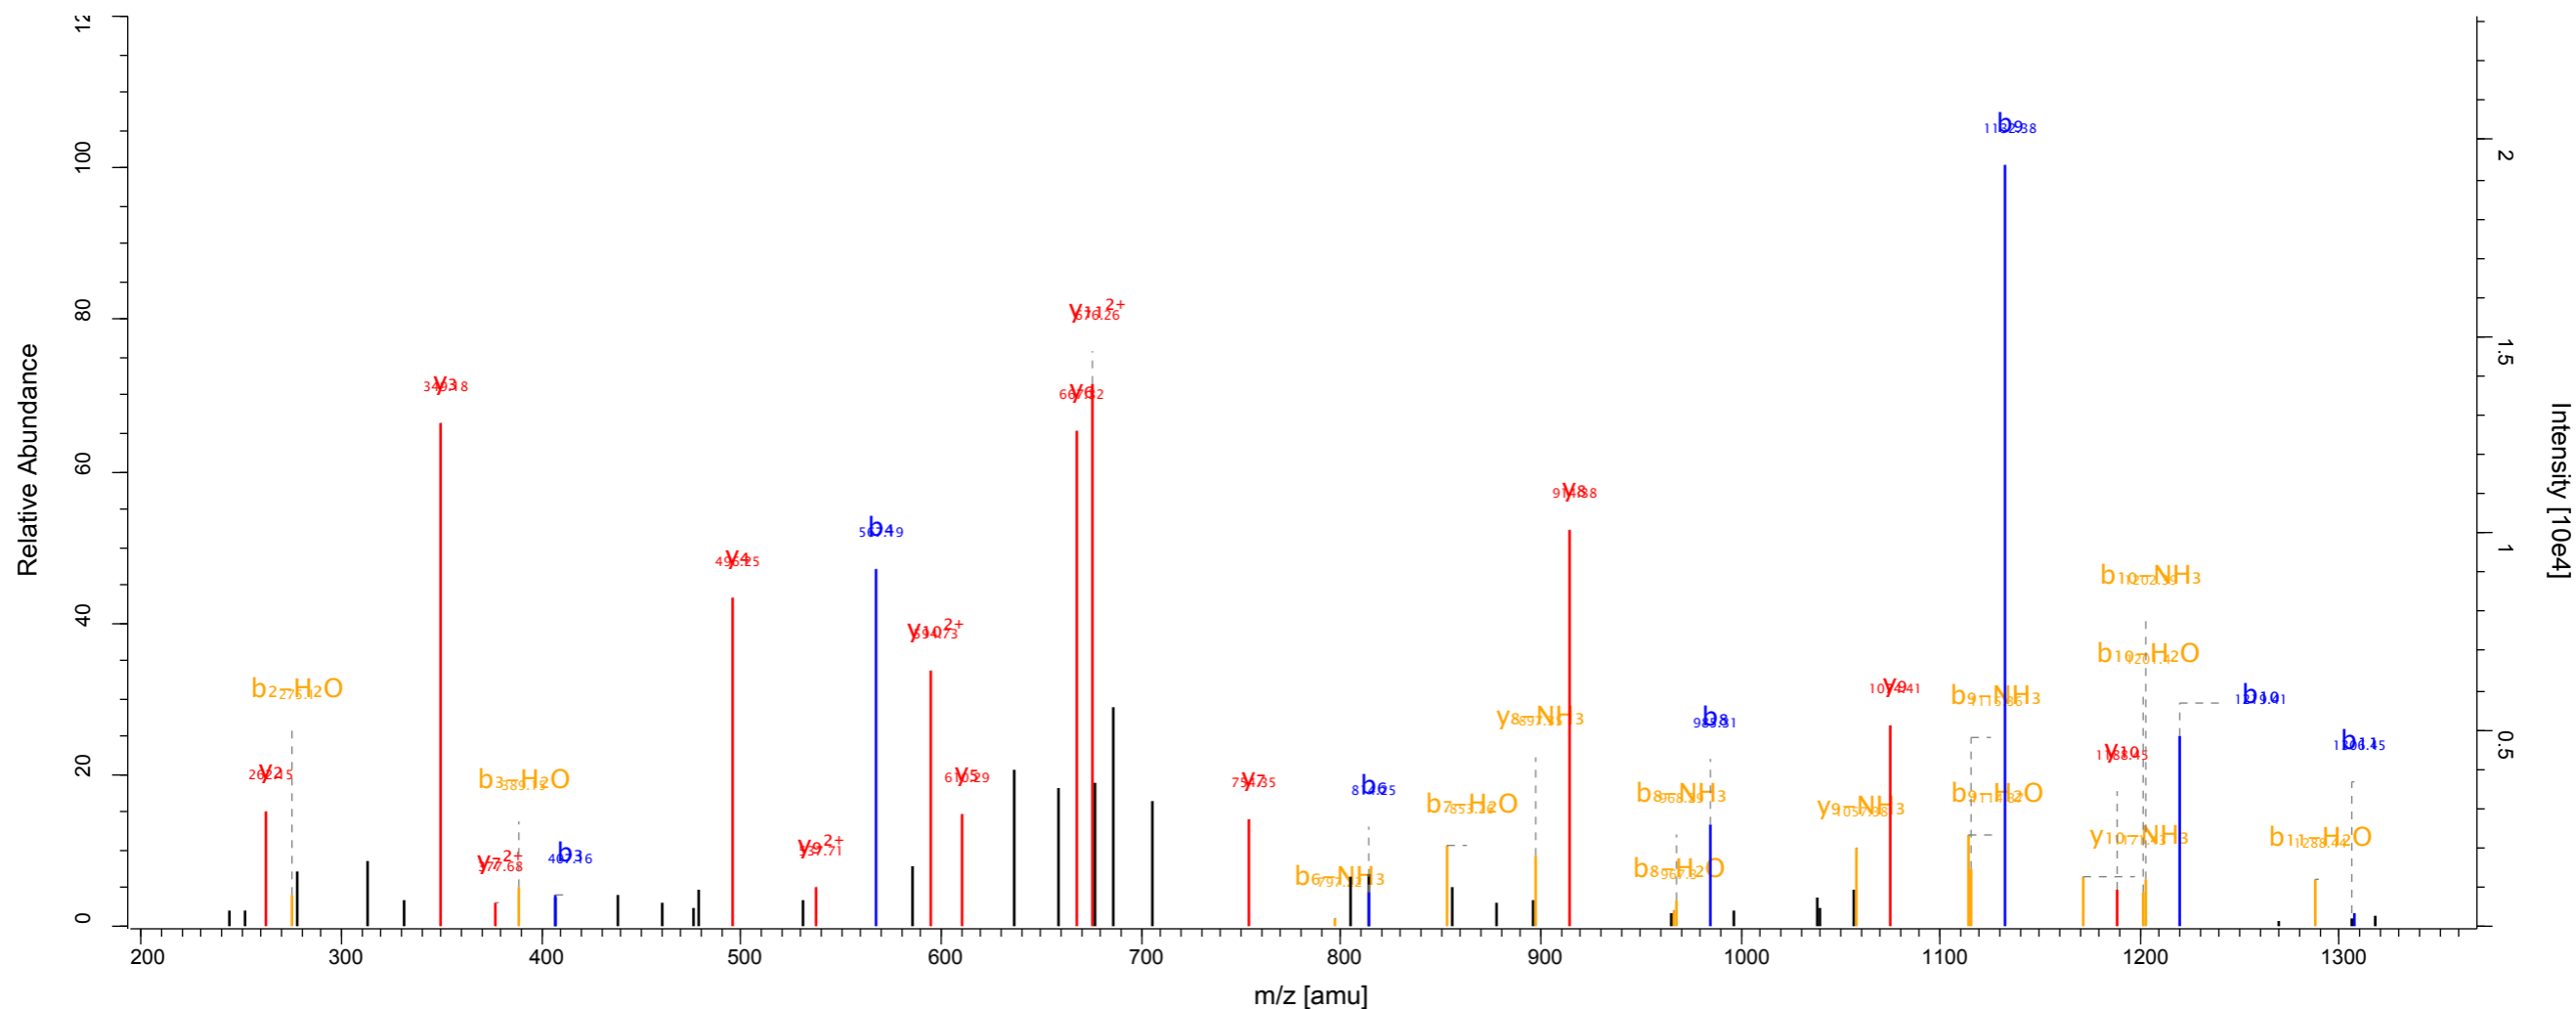

precursor information

|                   |                  |
|-------------------|------------------|
| Mass:             | 1470.55007       |
| m/z:              | 740.78231        |
| Charge:           | 2+               |
| Retention time:   | 30.1408641067773 |
| Score:            | 248.0500         |
| Mass Error [ppm]: | -0.43686         |
| PEP:              | 1.6156E-27       |
| Precursor Type:   | ISO              |

general information

|                       |          |
|-----------------------|----------|
| Annotation:           | 10 of 12 |
| AminoAcids Coverage:  | 82 %     |
| Intensity Coverage:   | 78 %     |
| Peak Coverage:        | 53 %     |
| Protein Localisation: | 2 ... 13 |

| b ion      |                |    |     |    | y ion          |            | y <sup>2+</sup> ion |            |
|------------|----------------|----|-----|----|----------------|------------|---------------------|------------|
| Δ dalton   | mass           |    | seq |    | Δ dalton       | mass       | Δ dalton            | mass       |
|            | 130.049869563  | 1  | S   | 11 |                |            |                     |            |
|            | 293.113198101  | 2  | Y   | 10 | 1351.515394886 |            | 676.261335676       | +0.029741  |
| -0.0355811 | 407.156125548  | 3  | N   | 9  | 1188.452066348 | +0.0594083 | 594.729671407       | +0.1657143 |
| -0.0384583 | 567.18677375   | 4  | C   | 8  | 1074.409138901 | -0.0021565 | 537.708207684       | +0.1177811 |
|            | 727.217421951  | 5  | C   | 7  | 914.378490699  | +0.0801885 | 914.378490699       |            |
| +0.1593631 | 814.249450361  | 6  | S   | 6  | 754.347842498  | +0.102658  | 377.677559482       | -0.4847494 |
|            | 871.270914085  | 7  | G   | 5  | 667.315814088  | +0.2010927 | 667.315814088       |            |
| -0.1488635 | 985.313841532  | 8  | N   | 4  | 610.294350364  | +0.0273049 | 610.294350364       |            |
| -0.1469039 | 1132.382255448 | 9  | F   | 3  | 496.251422917  | -0.0650826 | 496.251422917       |            |
| -0.1878434 | 1219.414283858 | 10 | S   | 2  | 349.183009001  | +0.0592395 | 349.183009001       |            |
| +0.2883069 | 1306.446312268 | 11 | S   | 1  | 262.150980591  | +0.1037191 | 262.150980591       |            |
|            |                | 12 | R   | 0  | 175.118952181  |            | 175.118952181       |            |

Scan number 15593 Raw file 20091019\_Orbi6\_MaHe\_SA\_ADH\_exp3\_12h\_Gel15  
 Method ITMS; CID Genenames DDR2

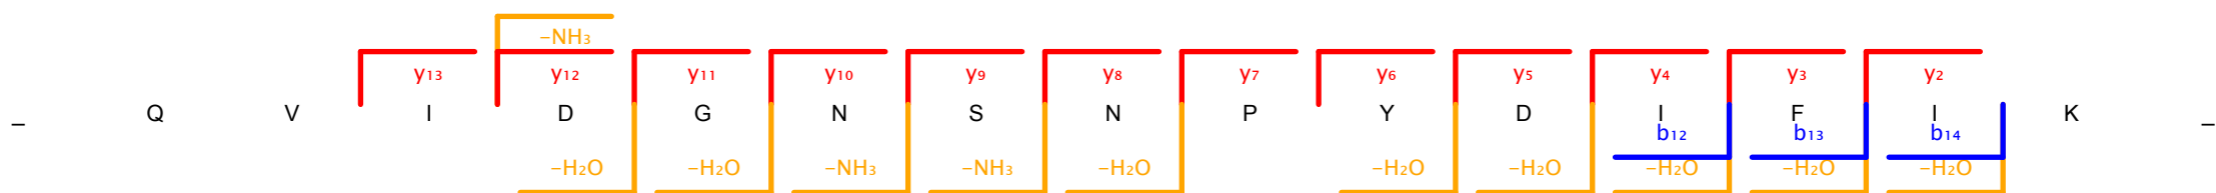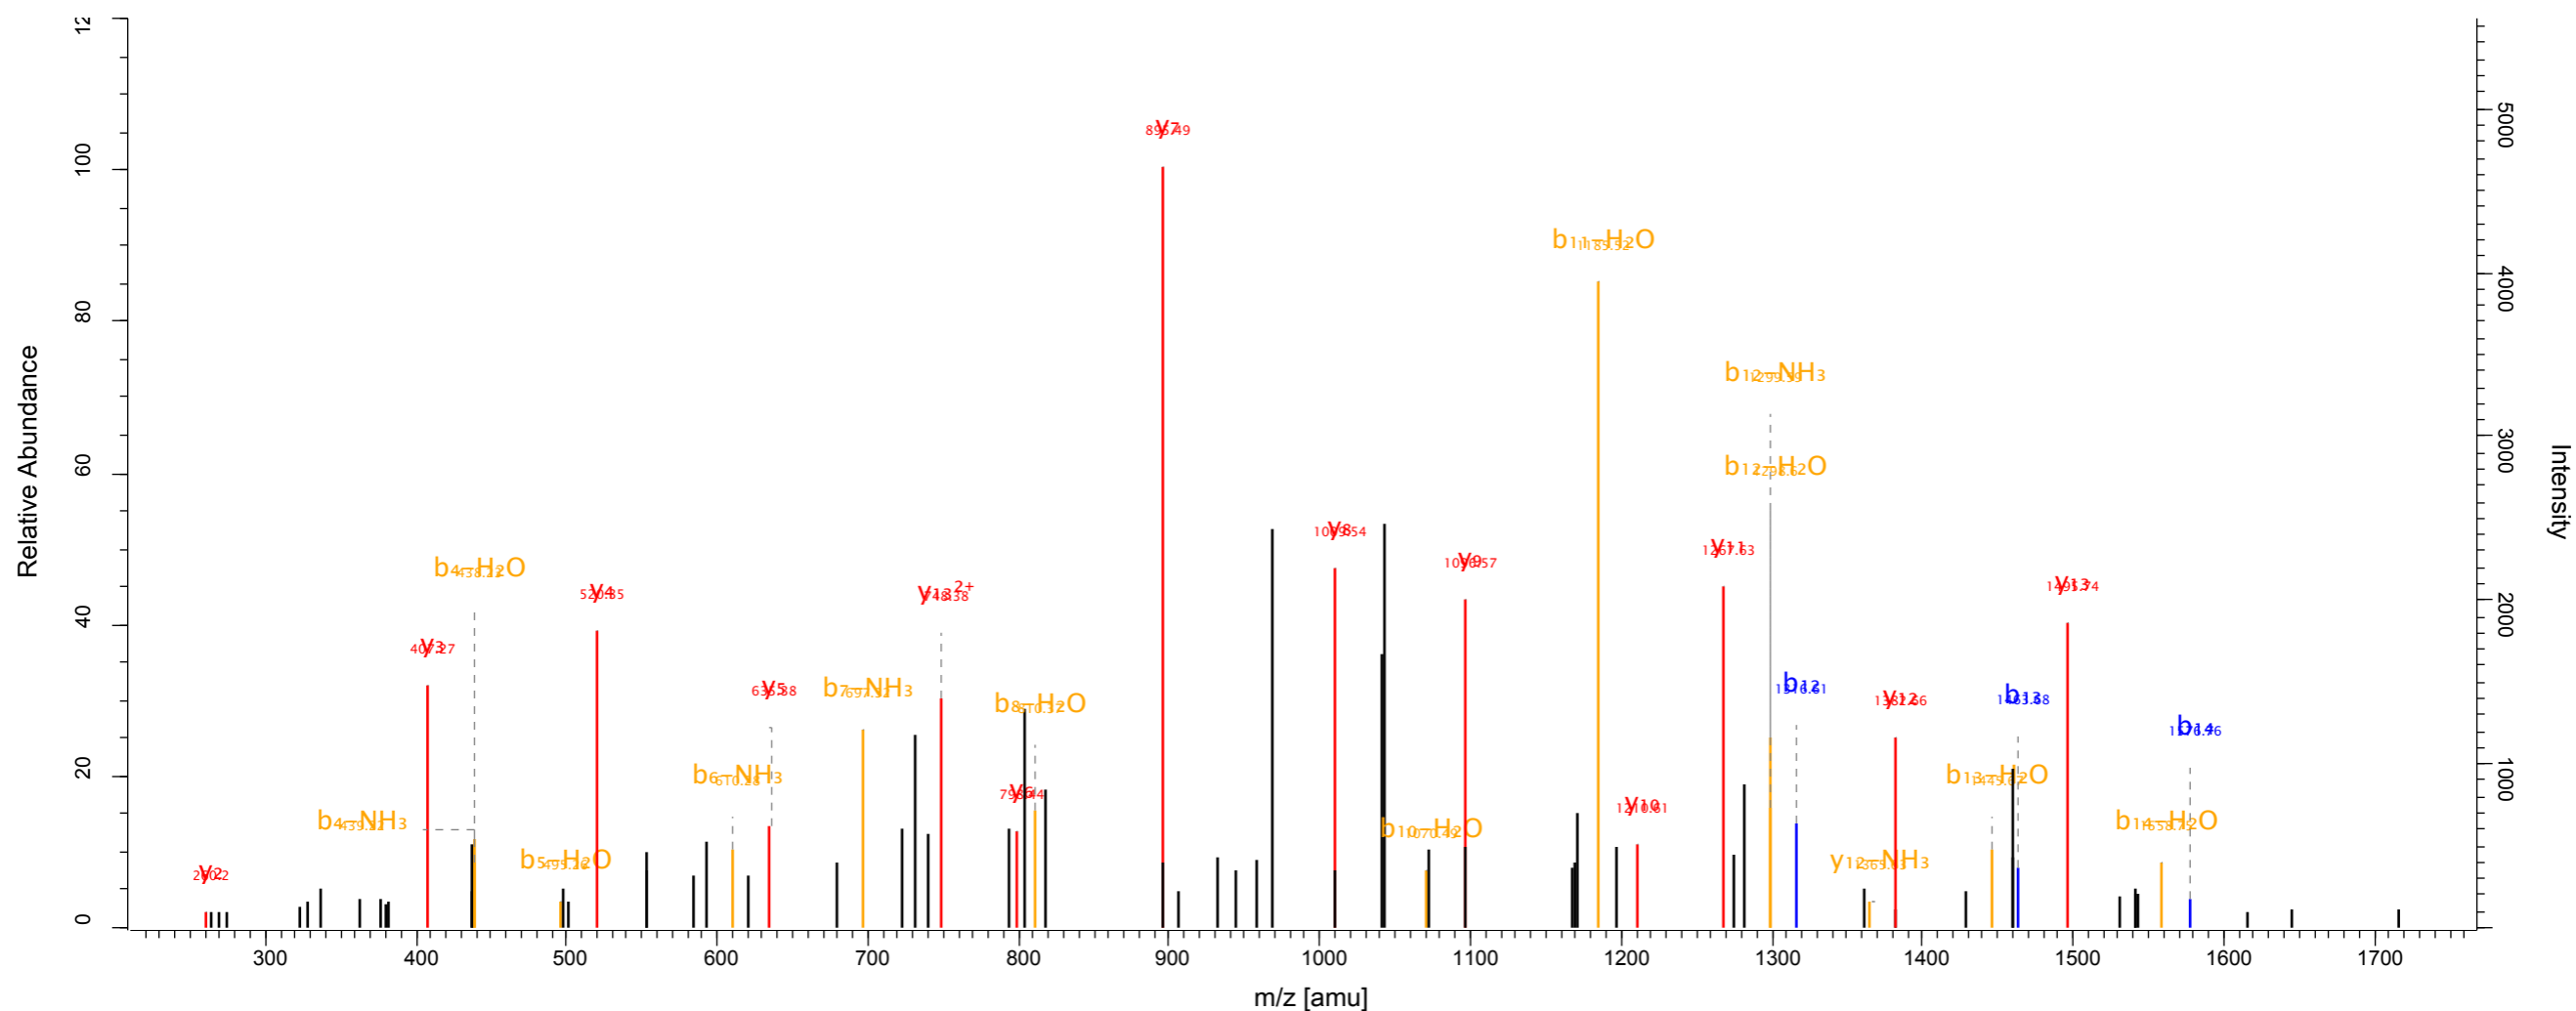

precursor information

|                   |                  |
|-------------------|------------------|
| Mass:             | 1721.86222       |
| m/z:              | 861.02844        |
| Charge:           | 2+               |
| Potentiaetime:    | 00.8002408770207 |
| Score:            | 106.5776         |
| Mass Error [ppm]: | -0.075638        |
| PEP:              | 0.0001055        |
| Precursor Type:   | MULTI            |

general information

|                       |             |
|-----------------------|-------------|
| Annotation:           | 13 of 15    |
| AminoAcids Coverage:  | 87%         |
| Intensity Coverage:   | 55%         |
| Peak Coverage:        | 25%         |
| Protein Localisation: | 139 ... 153 |

| b ion      |                |    |     |    | y ion          |            | y <sup>2+</sup> ion |            |
|------------|----------------|----|-----|----|----------------|------------|---------------------|------------|
| Δ dalton   | mass           |    | seq |    | Δ dalton       | mass       | Δ dalton            | mass       |
|            | 129.065853978  | 1  | Q   | 14 |                |            |                     |            |
|            | 228.134267894  | 2  | V   | 13 | 1594.811149426 |            | 1594.811149426      |            |
|            | 341.218331875  | 3  | I   | 12 | 1495.74273551  | -0.191588  | 748.375005988       | -0.0914367 |
|            | 456.245274907  | 4  | D   | 11 | 1382.65867153  | -0.0127975 | 1382.65867153       |            |
|            | 513.26673863   | 5  | G   | 10 | 1267.631728498 | -0.1389306 | 1267.631728498      |            |
|            | 627.309666077  | 6  | N   | 9  | 1210.610264774 | +0.0411024 | 1210.610264774      |            |
|            | 714.341694487  | 7  | S   | 8  | 1096.567337327 | -0.104935  | 1096.567337327      |            |
|            | 828.384621934  | 8  | N   | 7  | 1009.535308917 | -0.0672913 | 1009.535308917      |            |
|            | 925.437385786  | 9  | P   | 6  | 895.49238147   | +0.0361219 | 895.49238147        |            |
|            | 1088.500714325 | 10 | Y   | 5  | 798.439617618  | -0.101788  | 798.439617618       |            |
|            | 1203.527657357 | 11 | D   | 4  | 635.37628908   | -0.2465283 | 635.37628908        |            |
| +0.0716283 | 1316.611721337 | 12 | I   | 3  | 520.349346048  | -0.0981864 | 520.349346048       |            |
| -0.2403159 | 1463.680135253 | 13 | F   | 2  | 407.265282067  | -0.0309681 | 407.265282067       |            |
| +0.2337256 | 1576.764199234 | 14 | I   | 1  | 260.196868151  | +0.22873   | 260.196868151       |            |
|            |                | 15 | K   | 0  | 147.112804171  |            | 147.112804171       |            |

Scan number 17894 Raw file 20091019\_Orbi6\_MaHe\_SA\_ADH\_exp3\_12h\_Gel15  
 Method ITMS; CID Genenames ZNF281

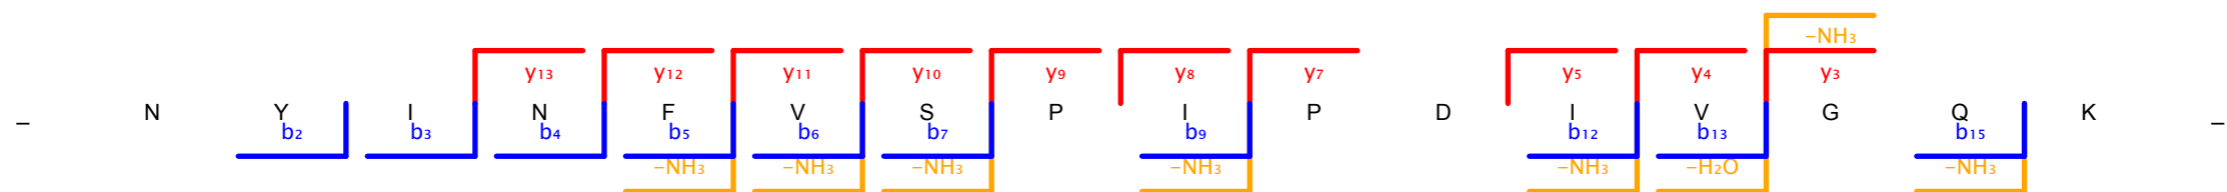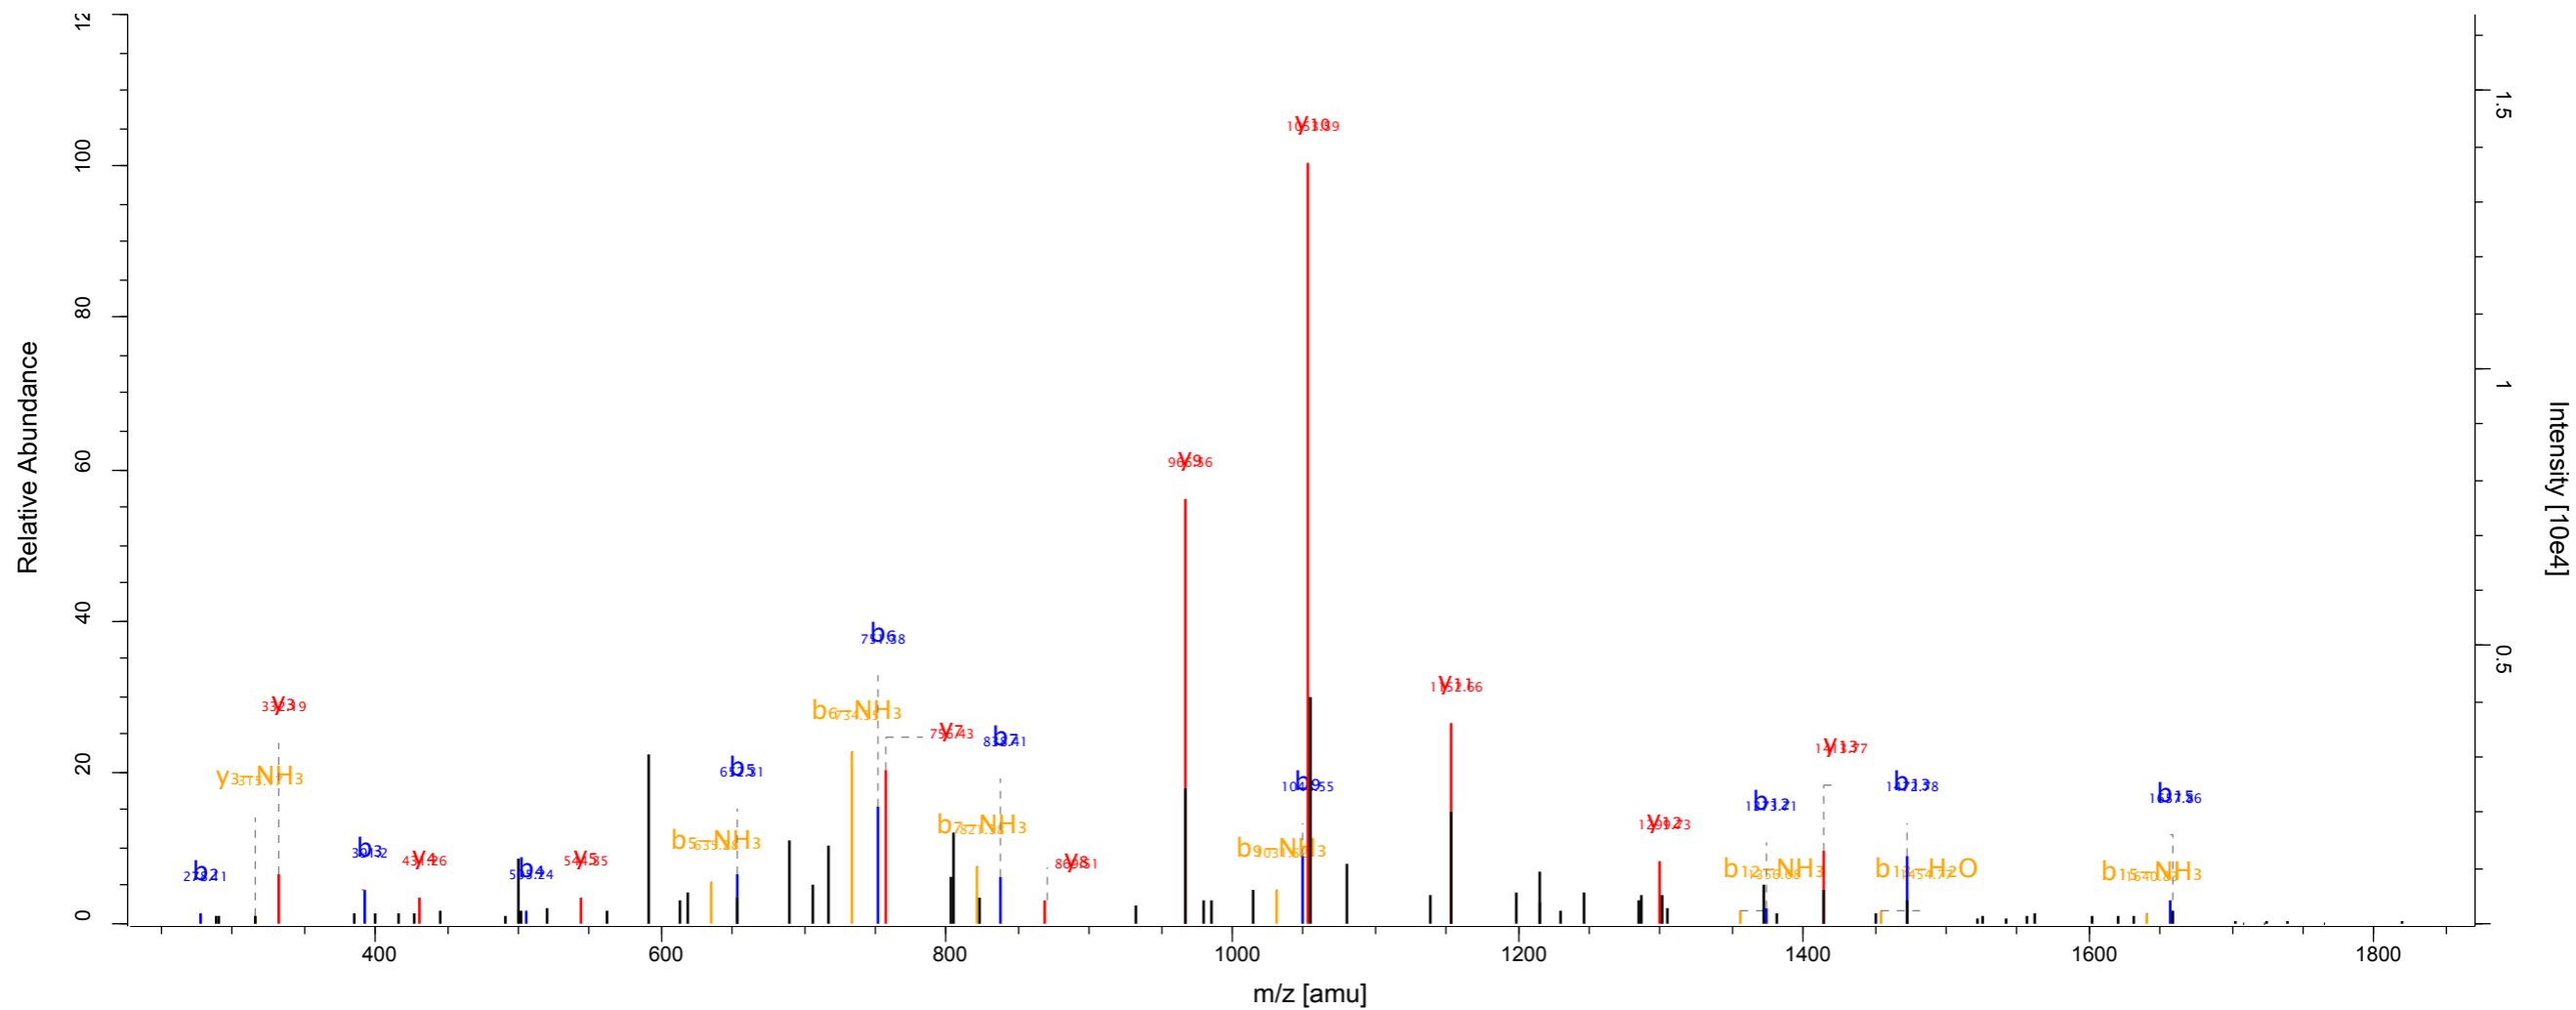

precursor information

|                   |                  |
|-------------------|------------------|
| Mass:             | 1802.05456       |
| m/z:              | 1002.48456       |
| Charge:           | 2+               |
| Retention time:   | 102.744766225252 |
| Score:            | 160.7706         |
| Mass Error [ppm]: | 1.1787           |
| DEP:              | 7.7251E-08       |
| Precursor Type:   | ISO              |

| b ion           |                |    |     |    | y ion           |      |            |
|-----------------|----------------|----|-----|----|-----------------|------|------------|
| $\Delta$ dalton | mass           |    | seq |    | $\Delta$ dalton | mass |            |
|                 | 115.050203914  | 1  | N   | 15 |                 |      |            |
| -0.1672434      | 278.113532452  | 2  | Y   | 14 | 1689.921034227  |      |            |
| +0.0933582      | 391.197596432  | 3  | I   | 13 | 1526.857705688  |      |            |
| -0.1707607      | 505.24052388   | 4  | N   | 12 | 1413.773641708  |      | -0.1961271 |
| -0.0201194      | 652.308937796  | 5  | F   | 11 | 1299.730714261  |      | -0.0577406 |
| +0.0708294      | 751.377351712  | 6  | V   | 10 | 1152.662300345  |      | -0.1820757 |
| -0.0280935      | 838.409380122  | 7  | S   | 9  | 1053.593886429  |      | -0.058486  |
|                 | 935.462143974  | 8  | P   | 8  | 966.561858019   |      | -0.0682057 |
| -0.1756025      | 1048.546207954 | 9  | I   | 7  | 869.509094167   |      | -0.1718139 |
|                 | 1145.598971806 | 10 | P   | 6  | 756.425030186   |      | -0.0745053 |
|                 | 1260.625914838 | 11 | D   | 5  | 659.372266334   |      |            |
| +0.4583561      | 1373.709978819 | 12 | I   | 4  | 544.345323302   |      | -0.2000596 |
| -0.1889152      | 1472.778392735 | 13 | V   | 3  | 431.261259322   |      | -0.1186812 |
|                 | 1529.799856459 | 14 | G   | 2  | 332.192845406   |      | -0.0559436 |
| -0.2162221      | 1657.85843397  | 15 | Q   | 1  | 275.171381682   |      |            |
|                 |                | 16 | K   | 0  | 147.112804171   |      |            |

general information

|                       |             |
|-----------------------|-------------|
| Annotation:           | 13 of 16    |
| AminoAcids Coverage:  | 81 %        |
| Intensity Coverage:   | 57 %        |
| Peak Coverage:        | 21 %        |
| Protein Localisation: | 478 ... 493 |

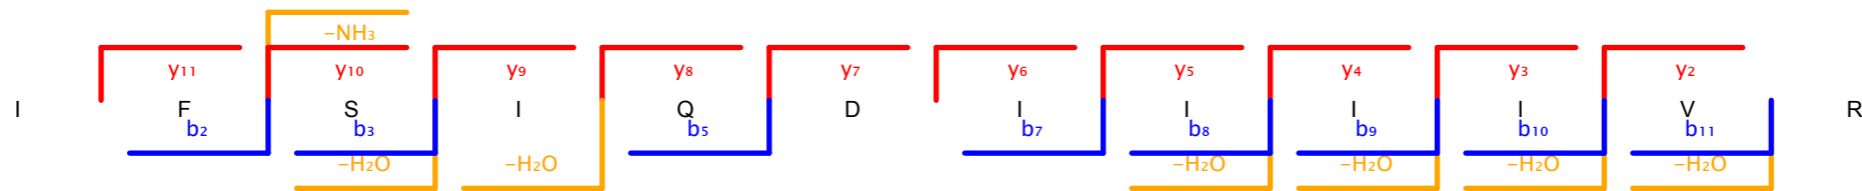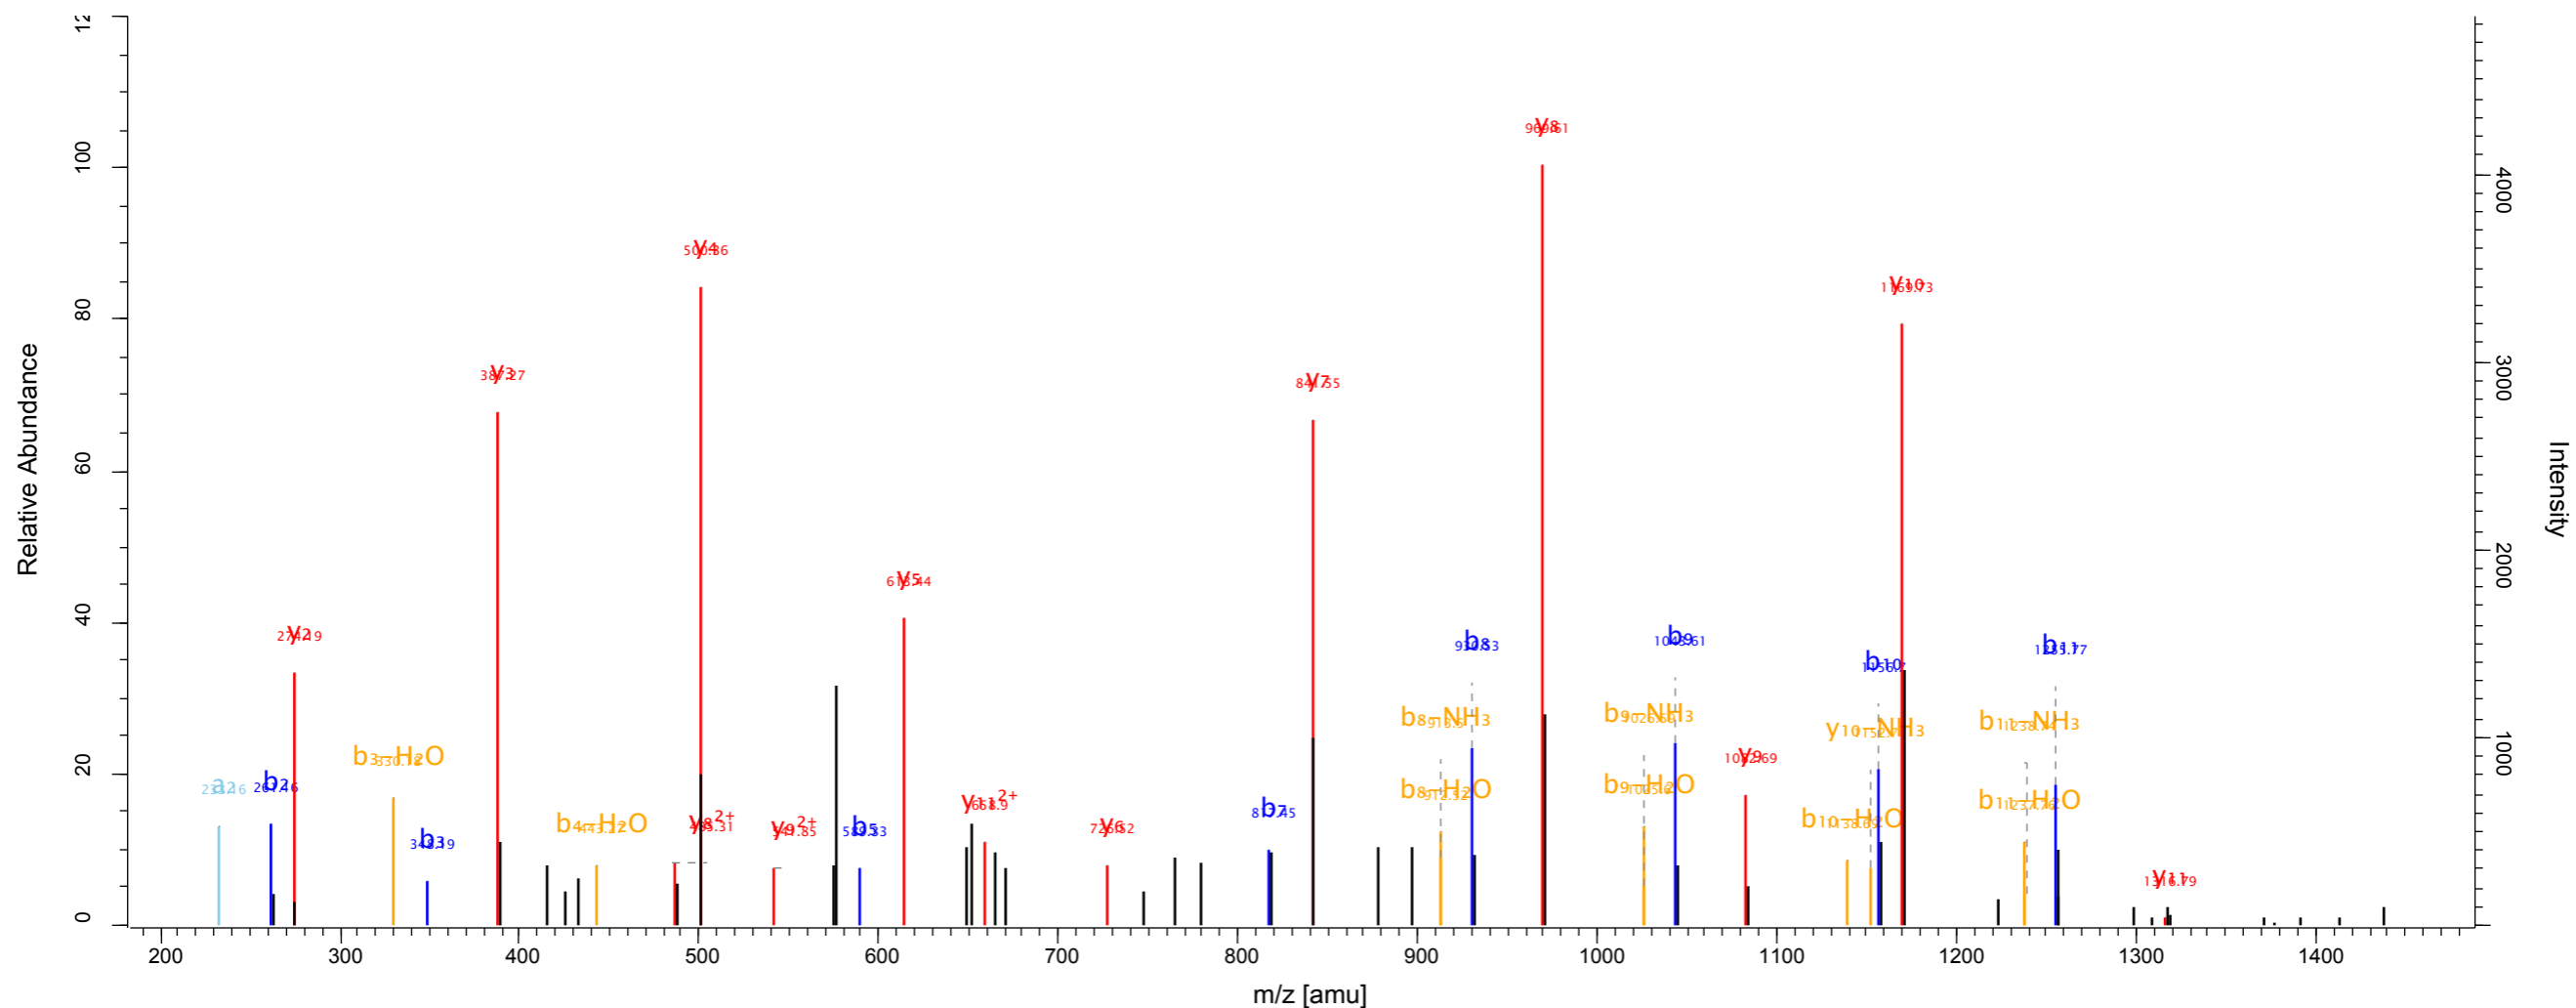

precursor information

|                   |                  |
|-------------------|------------------|
| Mass:             | 1428.87072       |
| m/z:              | 715.44264        |
| Charge:           | 2+               |
| Retention time:   | 122.402040800137 |
| Score:            | 224.6584         |
| Mass Error [ppm]: | 0.20650          |
| PEP:              | 2.1008E-14       |
| Precursor Type:   | ISO              |

general information

|                       |             |
|-----------------------|-------------|
| Annotation:           | 10 of 12    |
| AminoAcids Coverage:  | 82 %        |
| Intensity Coverage:   | 60 %        |
| Peak Coverage:        | 45 %        |
| Protein Localisation: | 734 ... 745 |

| a ion      |              | b ion      |              |    |     |    | y ion        |            | y <sup>2+</sup> ion |            |
|------------|--------------|------------|--------------|----|-----|----|--------------|------------|---------------------|------------|
| Δ dalton   | mass         | Δ dalton   | mass         |    | seq |    | Δ dalton     | mass       | Δ dalton            | mass       |
|            | 86.096425825 |            | 114.09134045 | 1  | I   | 11 |              |            |                     |            |
| +0.0601053 | 233.16483974 | -0.110499  | 261.15975436 | 2  | F   | 10 | 1316.7936489 | -0.066476  | 658.90046267        | +0.0220837 |
|            | 320.19686815 | -0.1472576 | 348.19178277 | 3  | S   | 9  | 1169.725235  | -0.0650787 | 1169.725235         |            |
|            | 433.28093213 |            | 461.27584675 | 4  | I   | 8  | 1082.6932065 | +0.062897  | 541.8502415         | -0.2638768 |
|            | 561.33950964 | -0.1084111 | 589.33442426 | 5  | Q   | 7  | 969.60914256 | +0.0483892 | 485.30820951        | +0.3616513 |
|            | 676.36645267 |            | 704.3613673  | 6  | D   | 6  | 841.55056505 | -0.0702794 | 841.55056505        |            |
|            | 789.45051666 | -0.0737882 | 817.44543128 | 7  | I   | 5  | 726.52362202 | +0.2112413 | 726.52362202        |            |
|            | 902.53458064 | -0.2328644 | 930.52949526 | 8  | I   | 4  | 613.43955804 | -0.0229931 | 613.43955804        |            |
|            | 1015.6186446 | -0.2528415 | 1043.6135592 | 9  | I   | 3  | 500.35549406 | -0.0657602 | 500.35549406        |            |
|            | 1128.7027086 | -0.2280187 | 1156.6976232 | 10 | I   | 2  | 387.27143008 | -0.0570746 | 387.27143008        |            |
|            | 1227.7711225 | -0.2820283 | 1255.7660371 | 11 | V   | 1  | 274.1873661  | +0.095837  | 274.1873661         |            |
|            |              |            |              | 12 | R   | 0  | 175.11895218 |            | 175.11895218        |            |

Scan number 17585 Raw file 20091019\_Orbi6\_MaHe\_SA\_ADH\_exp3\_12h\_Gel18  
 Method ITMS; CID Genenames CIC

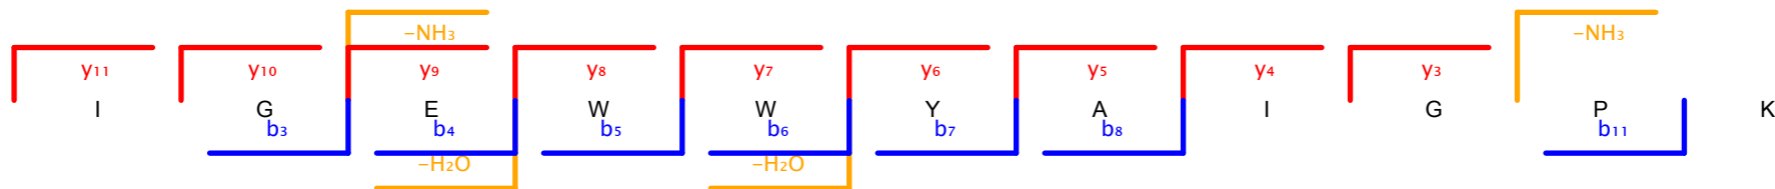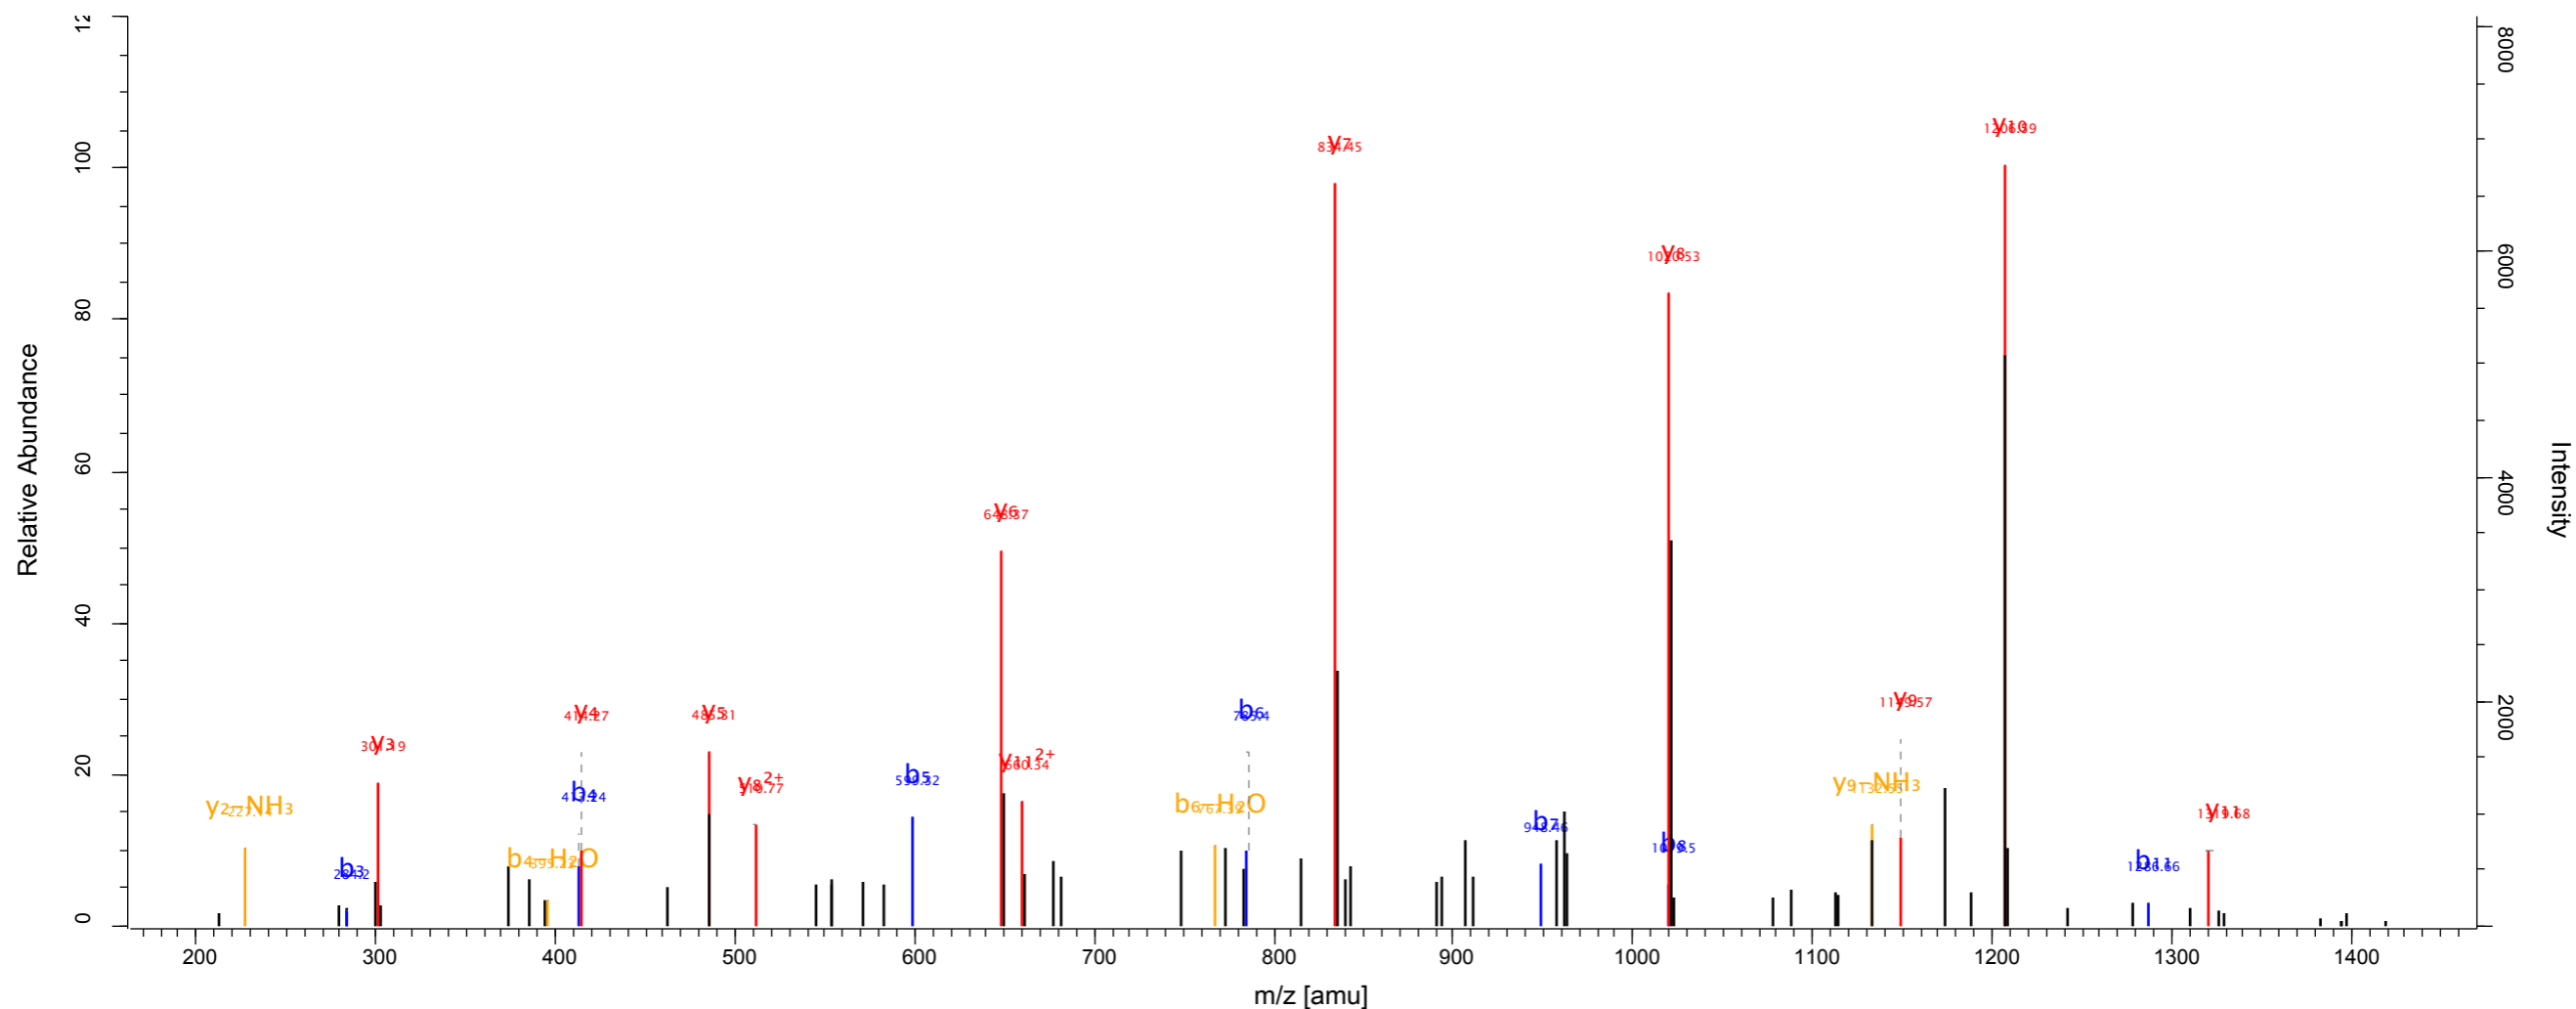

precursor information

|                   |                  |
|-------------------|------------------|
| Mass:             | 1421.75704       |
| m/z:              | 716.8858         |
| Charge:           | 2+               |
| Retention time:   | 102.822082788086 |
| Score:            | 145.5542         |
| Mass Error [ppm]: | 1.3762           |
| PEP:              | 6.307E-05        |
| Precursor Type:   | ISO              |

general information

|                       |             |
|-----------------------|-------------|
| Annotation:           | 10 of 12    |
| AminoAcids Coverage:  | 82 %        |
| Intensity Coverage:   | 52 %        |
| Peak Coverage:        | 20 %        |
| Protein Localisation: | 233 ... 244 |

| b ion      |                |    |     |    | y ion          |            | y <sup>2+</sup> ion |            |
|------------|----------------|----|-----|----|----------------|------------|---------------------|------------|
| Δ dalton   | mass           |    | seq |    | Δ dalton       | mass       | Δ dalton            | mass       |
|            | 114.091340447  | 1  | I   | 11 |                |            |                     |            |
|            | 227.175404427  | 2  | I   | 10 | 1319.67828476  | +0.2307729 | 660.342780613       | -0.2070384 |
| +0.0456245 | 284.196868151  | 3  | G   | 9  | 1206.59422078  | -0.1409737 | 1206.59422078       |            |
| +0.0450847 | 413.239461247  | 4  | E   | 8  | 1149.572757056 | -0.1232942 | 1149.572757056      |            |
| -0.0075559 | 599.318774201  | 5  | W   | 7  | 1020.53016396  | -0.1399662 | 510.768720213       | +0.2303032 |
| -0.0872961 | 785.398087154  | 6  | W   | 6  | 834.450851006  | -0.0486904 | 834.450851006       |            |
| +0.2266336 | 948.461415692  | 7  | Y   | 5  | 648.371538053  | -0.0262622 | 648.371538053       |            |
| -0.2326603 | 1019.49852948  | 8  | A   | 4  | 485.308209514  | -0.1377383 | 485.308209514       |            |
|            | 1132.582593461 | 9  | I   | 3  | 414.271095727  | -0.0103535 | 414.271095727       |            |
|            | 1189.604057184 | 10 | G   | 2  | 301.187031746  | +0.09373   | 301.187031746       |            |
| -0.3330906 | 1286.656821036 | 11 | P   | 1  | 244.165568023  |            | 244.165568023       |            |
|            |                | 12 | K   | 0  | 147.112804171  |            | 147.112804171       |            |

Scan number 4445 Raw file 20091021\_Orbi6\_MaHe\_SA\_ADH\_exp3\_30h\_Gel01  
 Method ITMS; CID Genenames C1orf21

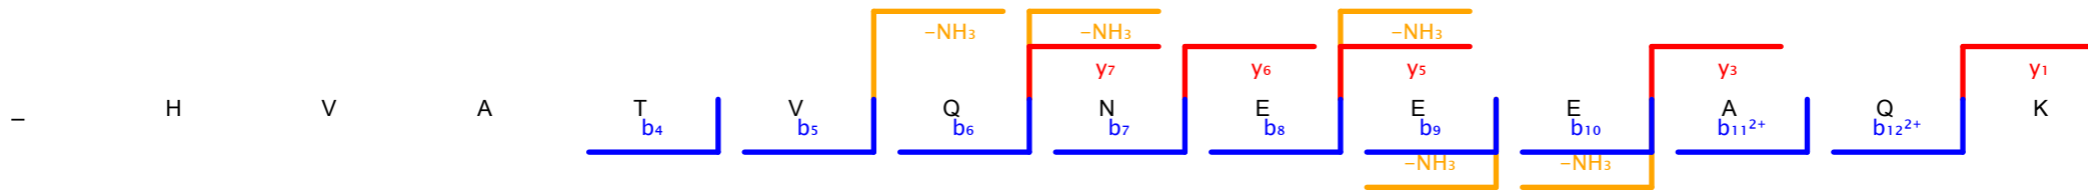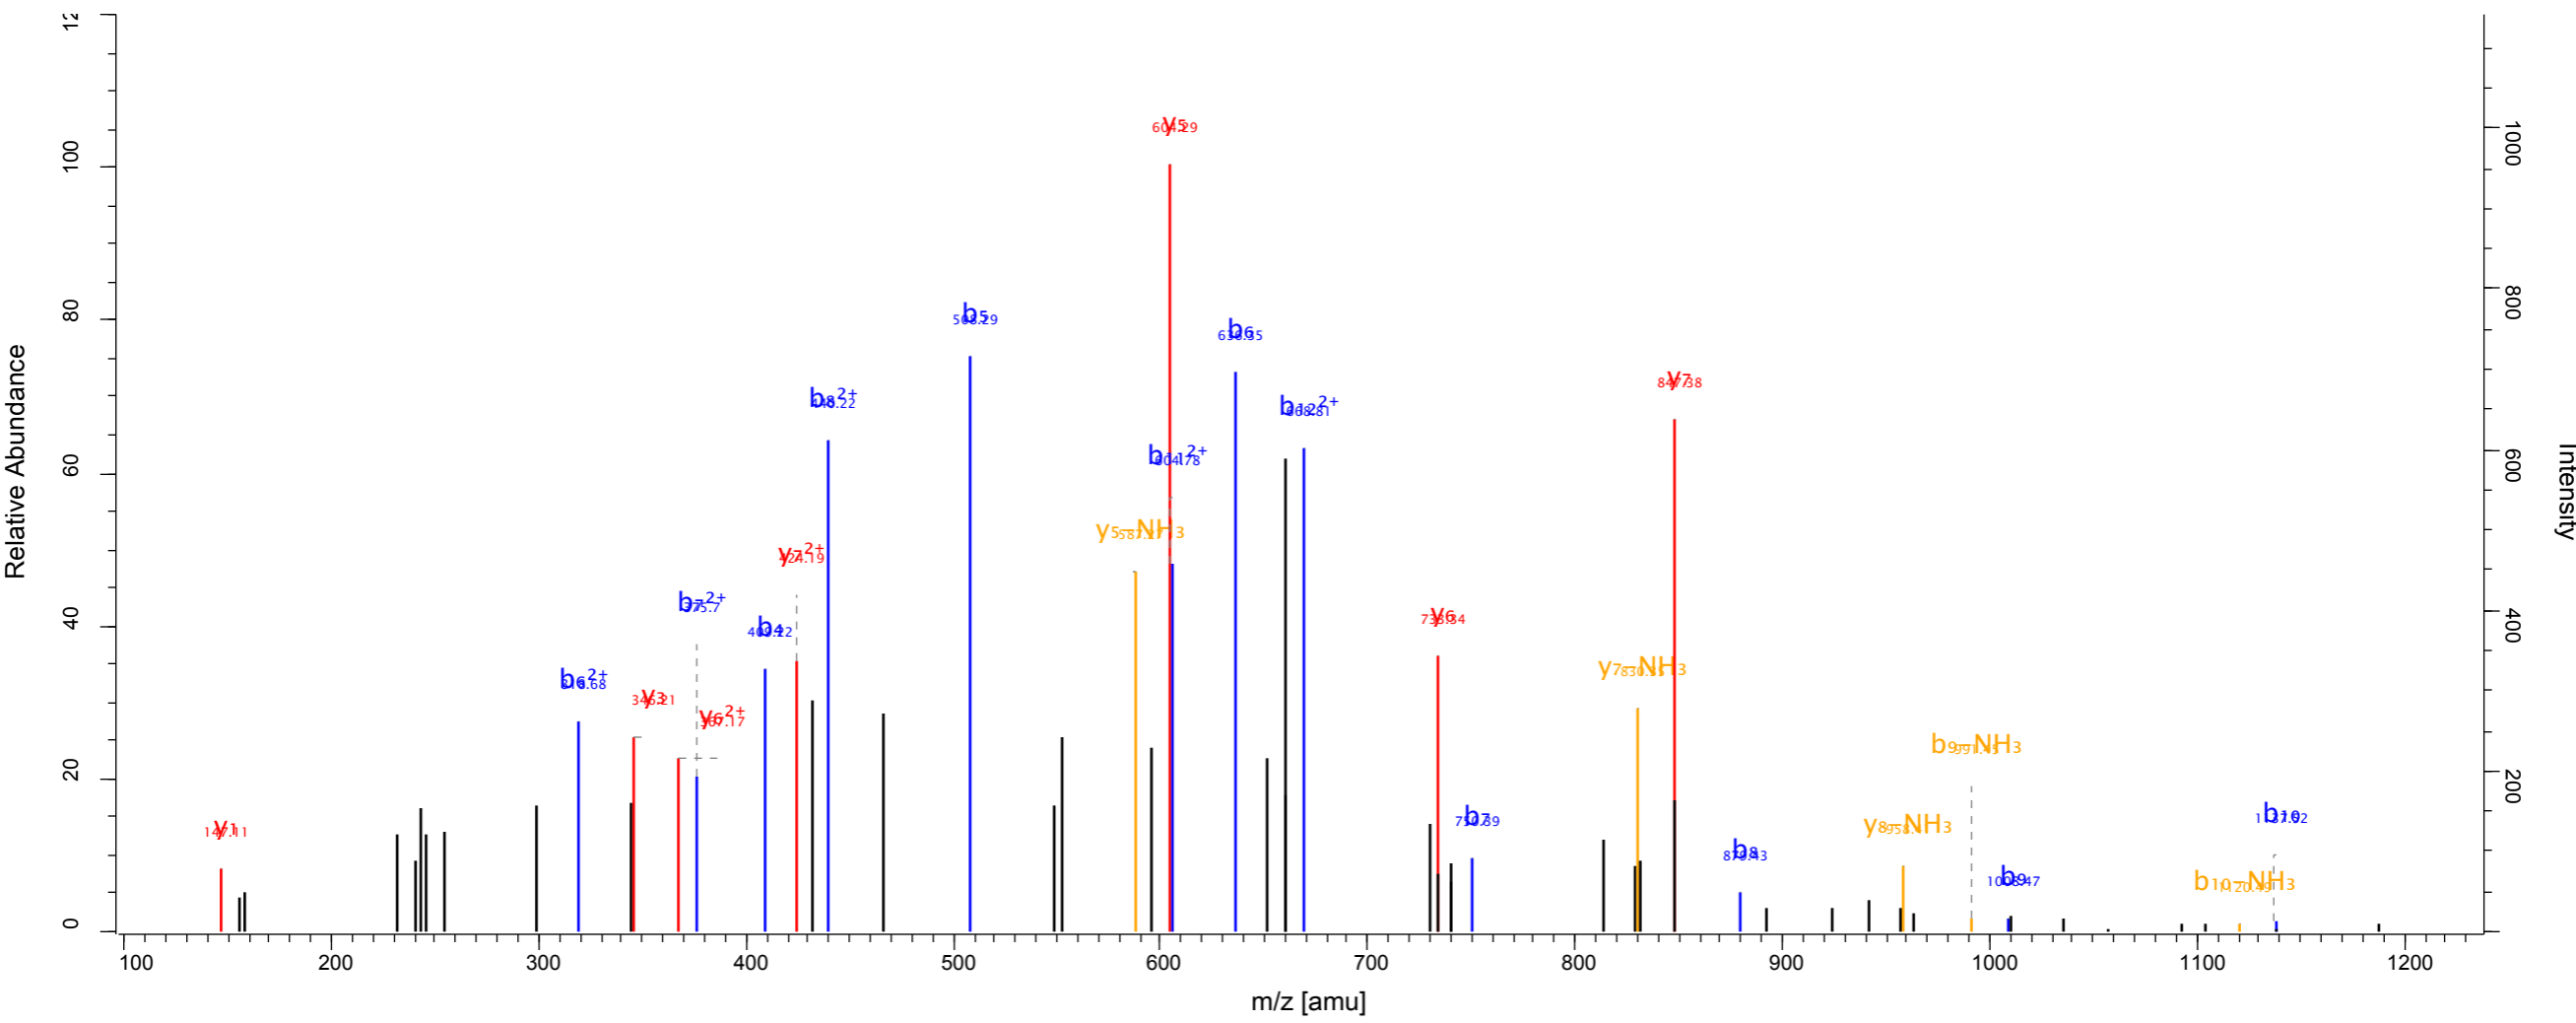

precursor information

|                   |                  |
|-------------------|------------------|
| Mass:             | 1481.71082       |
| m/z:              | 104.01080        |
| Charge:           | 2+               |
| Retention time:   | 27.2760241232008 |
| Score:            | 142.0965         |
| Mass Error (ppm): | -0.12725         |
| PEP:              | 5.3286E-05       |
| Precursor Type:   | ISO              |

general information

|                       |          |
|-----------------------|----------|
| Annotation:           | 10 of 12 |
| AminoAcids Coverage:  | 77%      |
| Intensity Coverage:   | 65%      |
| Peak Coverage:        | 20%      |
| Protein Localisation: | 8 ... 20 |

| b <sup>2+</sup> ion |              | b ion      |              |    |     |    | y ion        |            | y <sup>2+</sup> ion |            |
|---------------------|--------------|------------|--------------|----|-----|----|--------------|------------|---------------------|------------|
| Δ dalton            | mass         | Δ dalton   | mass         |    | seq |    | Δ dalton     | mass       | Δ dalton            | mass       |
|                     | 138.06618833 |            | 138.06618833 | 1  | H   | 12 |              |            |                     |            |
|                     | 237.13460225 |            | 237.13460225 | 2  | V   | 11 | 1345.6593998 |            | 1345.6593998        |            |
|                     | 308.17171603 |            | 308.17171603 | 3  | A   | 10 | 1246.5909859 |            | 1246.5909859        |            |
|                     | 409.21939451 | -0.1096838 | 409.21939451 | 4  | T   | 9  | 1175.5538721 |            | 1175.5538721        |            |
|                     | 508.28780842 | -0.0415011 | 508.28780842 | 5  | V   | 8  | 1074.5061936 |            | 1074.5061936        |            |
| +0.1453124          | 318.6768312  | +0.023365  | 636.34638593 | 6  | Q   | 7  | 975.43777972 |            | 975.43777972        |            |
| +0.2976157          | 375.69829492 | -0.1877753 | 750.38931338 | 7  | N   | 6  | 847.37920221 | -0.0401519 | 424.19323934        | -0.0002767 |
| -0.0948966          | 440.21959147 | +0.0027249 | 879.43190648 | 8  | E   | 5  | 733.33627476 | -0.0534989 | 367.17177561        | -0.1043012 |
|                     | 1008.4744996 | -0.1103028 | 1008.4744996 | 9  | E   | 4  | 604.29368166 | -0.1100269 | 604.29368166        |            |
|                     | 1137.5170927 | +0.1846896 | 1137.5170927 | 10 | E   | 3  | 475.25108857 |            | 475.25108857        |            |
| +0.383321           | 604.78074146 |            | 1208.5542065 | 11 | A   | 2  | 346.20849547 | +0.0199591 | 346.20849547        |            |
| +0.0830972          | 668.81003022 |            | 1336.612784  | 12 | Q   | 1  | 275.17138168 |            | 275.17138168        |            |
|                     |              |            |              | 13 | K   | 0  | 147.11280417 | +0.1090586 | 147.11280417        |            |

Scan number 15146 Raw file 20091021\_Orbi6\_MaHe\_SA\_ADH\_exp3\_30h\_Gel03  
 Method ITMS; CID Genenames CCDC28A

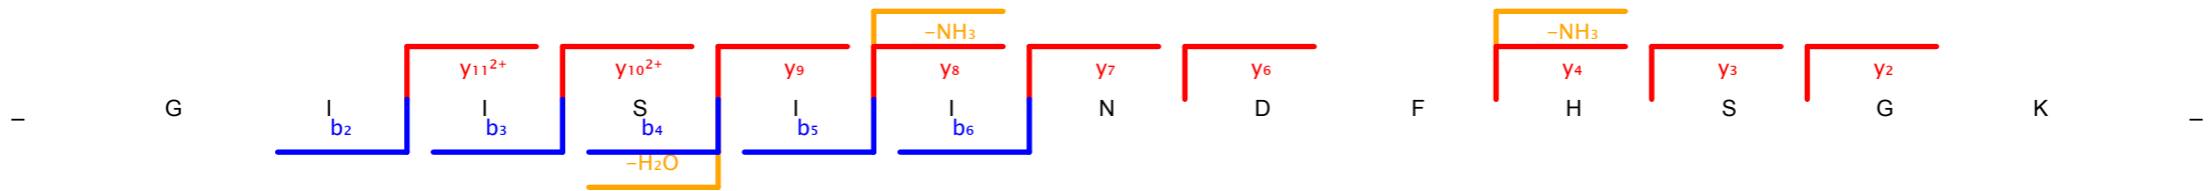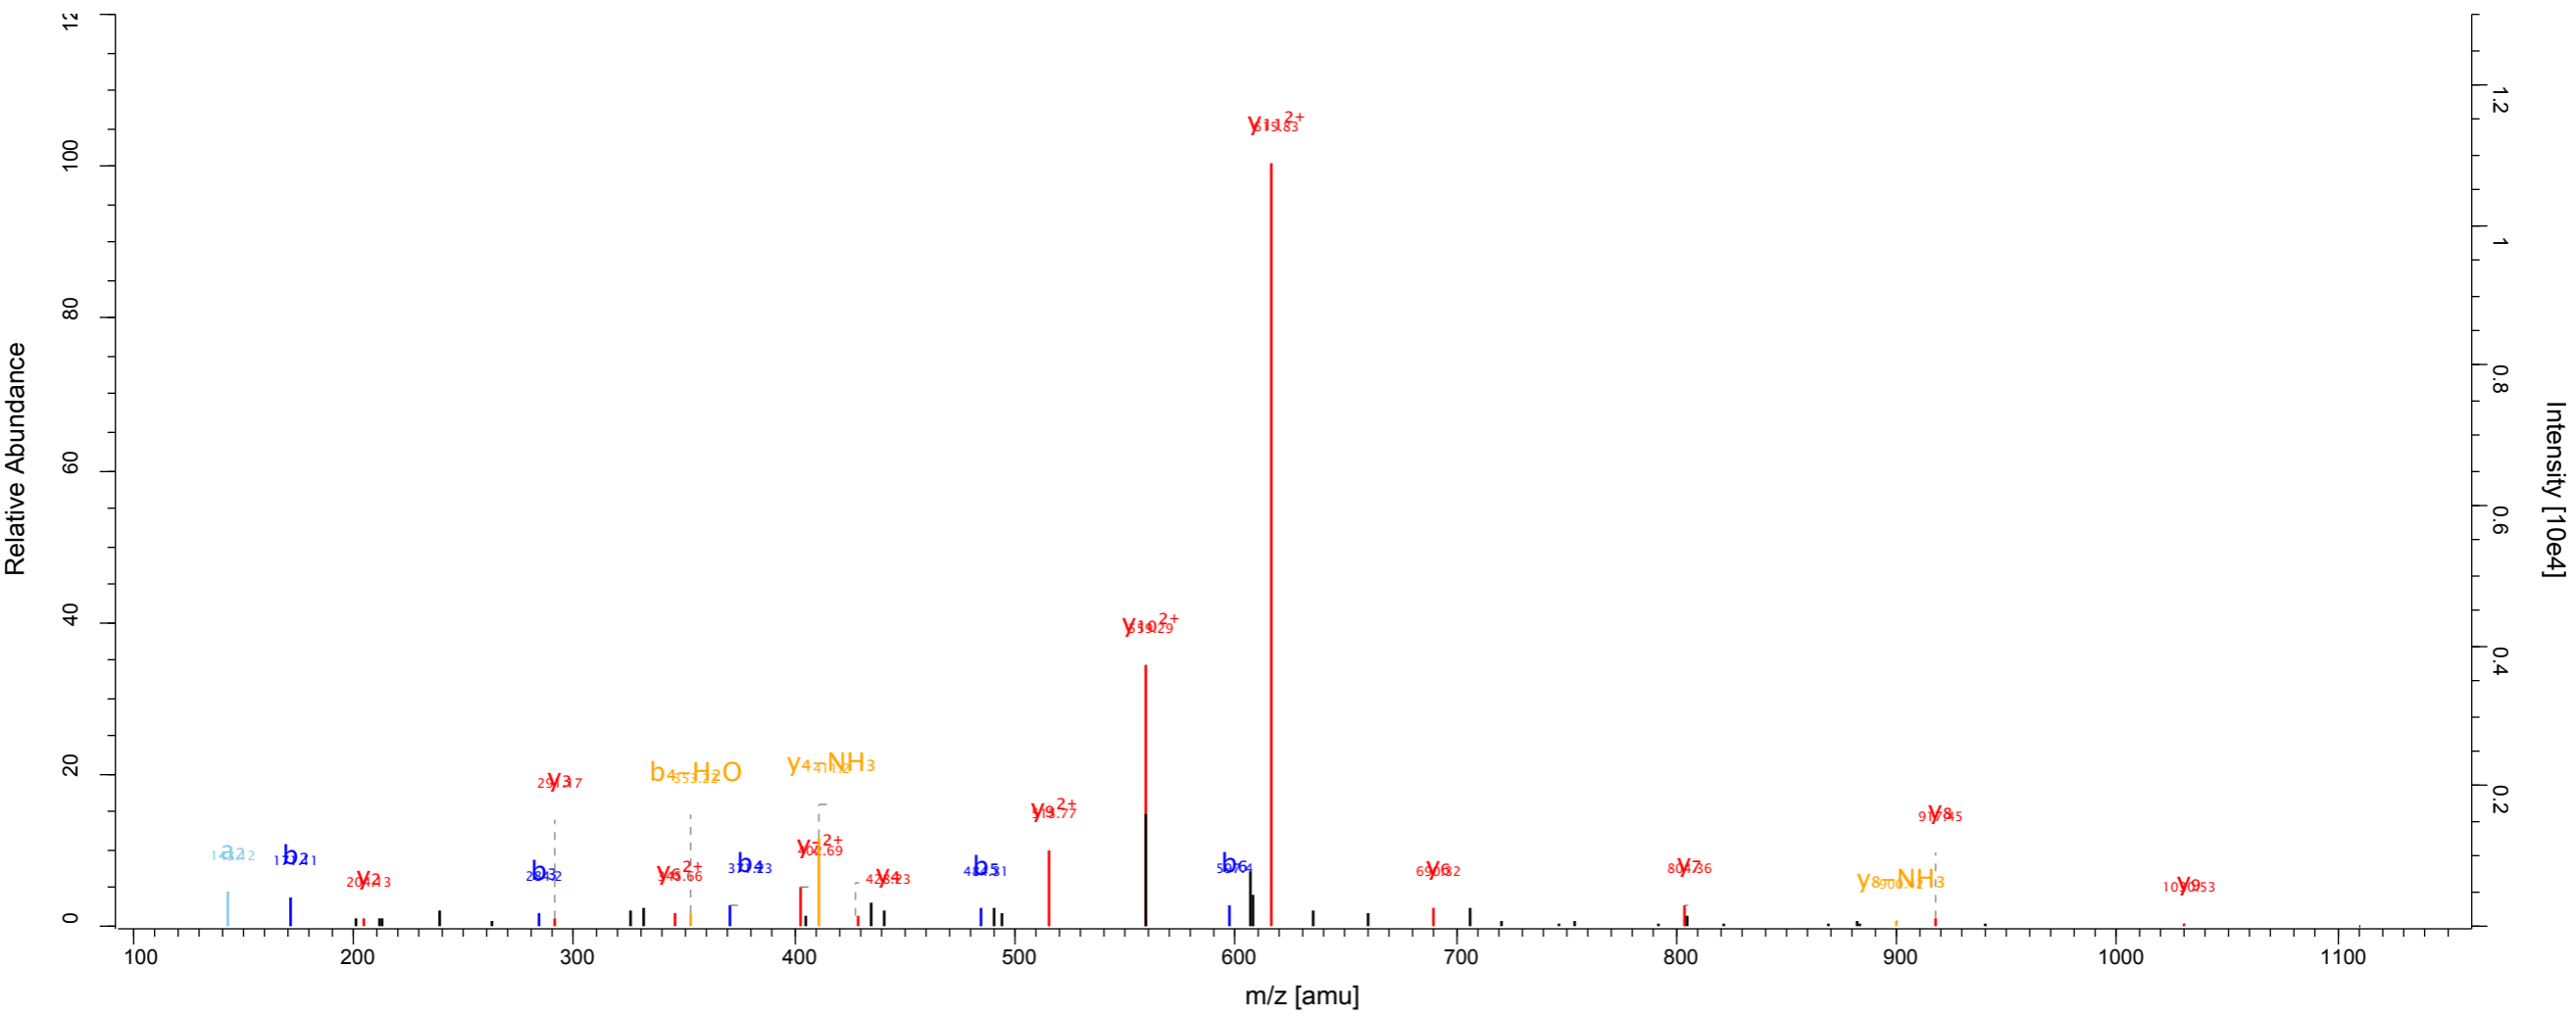

precursor information

|                   |                  |
|-------------------|------------------|
| Mass:             | 1200.74570       |
| m/z:              | 467.58021        |
| Charge:           | 2+               |
| Retention time:   | 01.6504745482308 |
| Score:            | 130.006          |
| Mass Error (ppm): | -0.1251          |
| PEP:              | 0.00027504       |
| Precursor Type:   | ISO              |

general information

|                       |             |
|-----------------------|-------------|
| Annotation:           | 10 of 12    |
| AminoAcids Coverage:  | 77 %        |
| Intensity Coverage:   | 76 %        |
| Peak Coverage:        | 42 %        |
| Protein Localisation: | 181 ... 193 |

| a ion      |              | b ion      |              |    |     |    | y ion        |            | y <sup>2+</sup> ion |            |
|------------|--------------|------------|--------------|----|-----|----|--------------|------------|---------------------|------------|
| Δ dalton   | mass         | Δ dalton   | mass         |    | seq |    | Δ dalton     | mass       | Δ dalton            | mass       |
|            | 30.033825568 |            | 58.02874019  | 1  | G   | 12 |              |            |                     |            |
| -0.0309602 | 143.11788955 | -0.1725423 | 171.11280417 | 2  | I   | 11 | 1343.7317769 |            | 1343.7317769        |            |
|            | 256.20195353 | -0.2801201 | 284.19686815 | 3  | I   | 10 | 1230.6477129 |            | 615.82749469        | +0.138997  |
|            | 343.23398194 | -0.1995387 | 371.22889656 | 4  | S   | 9  | 1117.5636489 |            | 559.2854627         | +0.0158679 |
|            | 456.31804592 | -0.1671781 | 484.31296054 | 5  | I   | 8  | 1030.5316205 | -0.1920209 | 515.76944849        | +0.1219089 |
|            | 569.4021099  | +0.1544281 | 597.39702452 | 6  | I   | 7  | 917.44755654 | -0.0911723 | 917.44755654        |            |
|            | 683.44503735 |            | 711.43995197 | 7  | N   | 6  | 804.36349256 | -0.2143837 | 402.68538451        | +0.1918433 |
|            | 798.47198038 |            | 826.466895   | 8  | D   | 5  | 690.32056511 | -0.0834435 | 345.66392079        | +0.1528212 |
|            | 945.5403943  |            | 973.53530892 | 9  | F   | 4  | 575.29362208 |            | 575.29362208        |            |
|            | 1082.5993062 |            | 1110.5942208 | 10 | H   | 3  | 428.22520817 | +0.1388971 | 428.22520817        |            |
|            | 1169.6313346 |            | 1197.6262492 | 11 | S   | 2  | 291.1662963  | +0.1573121 | 291.1662963         |            |
|            | 1226.6527983 |            | 1254.6477129 | 12 | G   | 1  | 204.13426789 | +0.1008243 | 204.13426789        |            |
|            |              |            |              | 13 | K   | 0  | 147.11280417 |            | 147.11280417        |            |



Scan number 7576 Raw file 20091021\_Orbi6\_MaHe\_SA\_ADH\_exp3\_30h\_Gel03  
 Method ITMS; CID Genenames B9D1

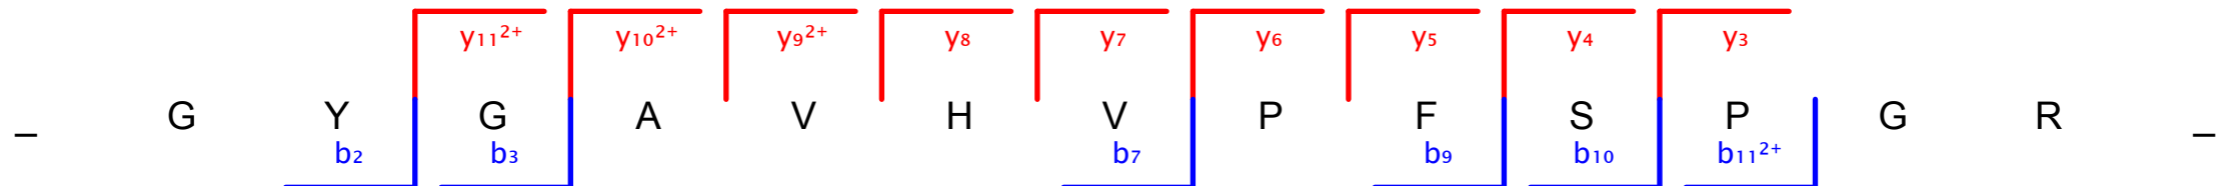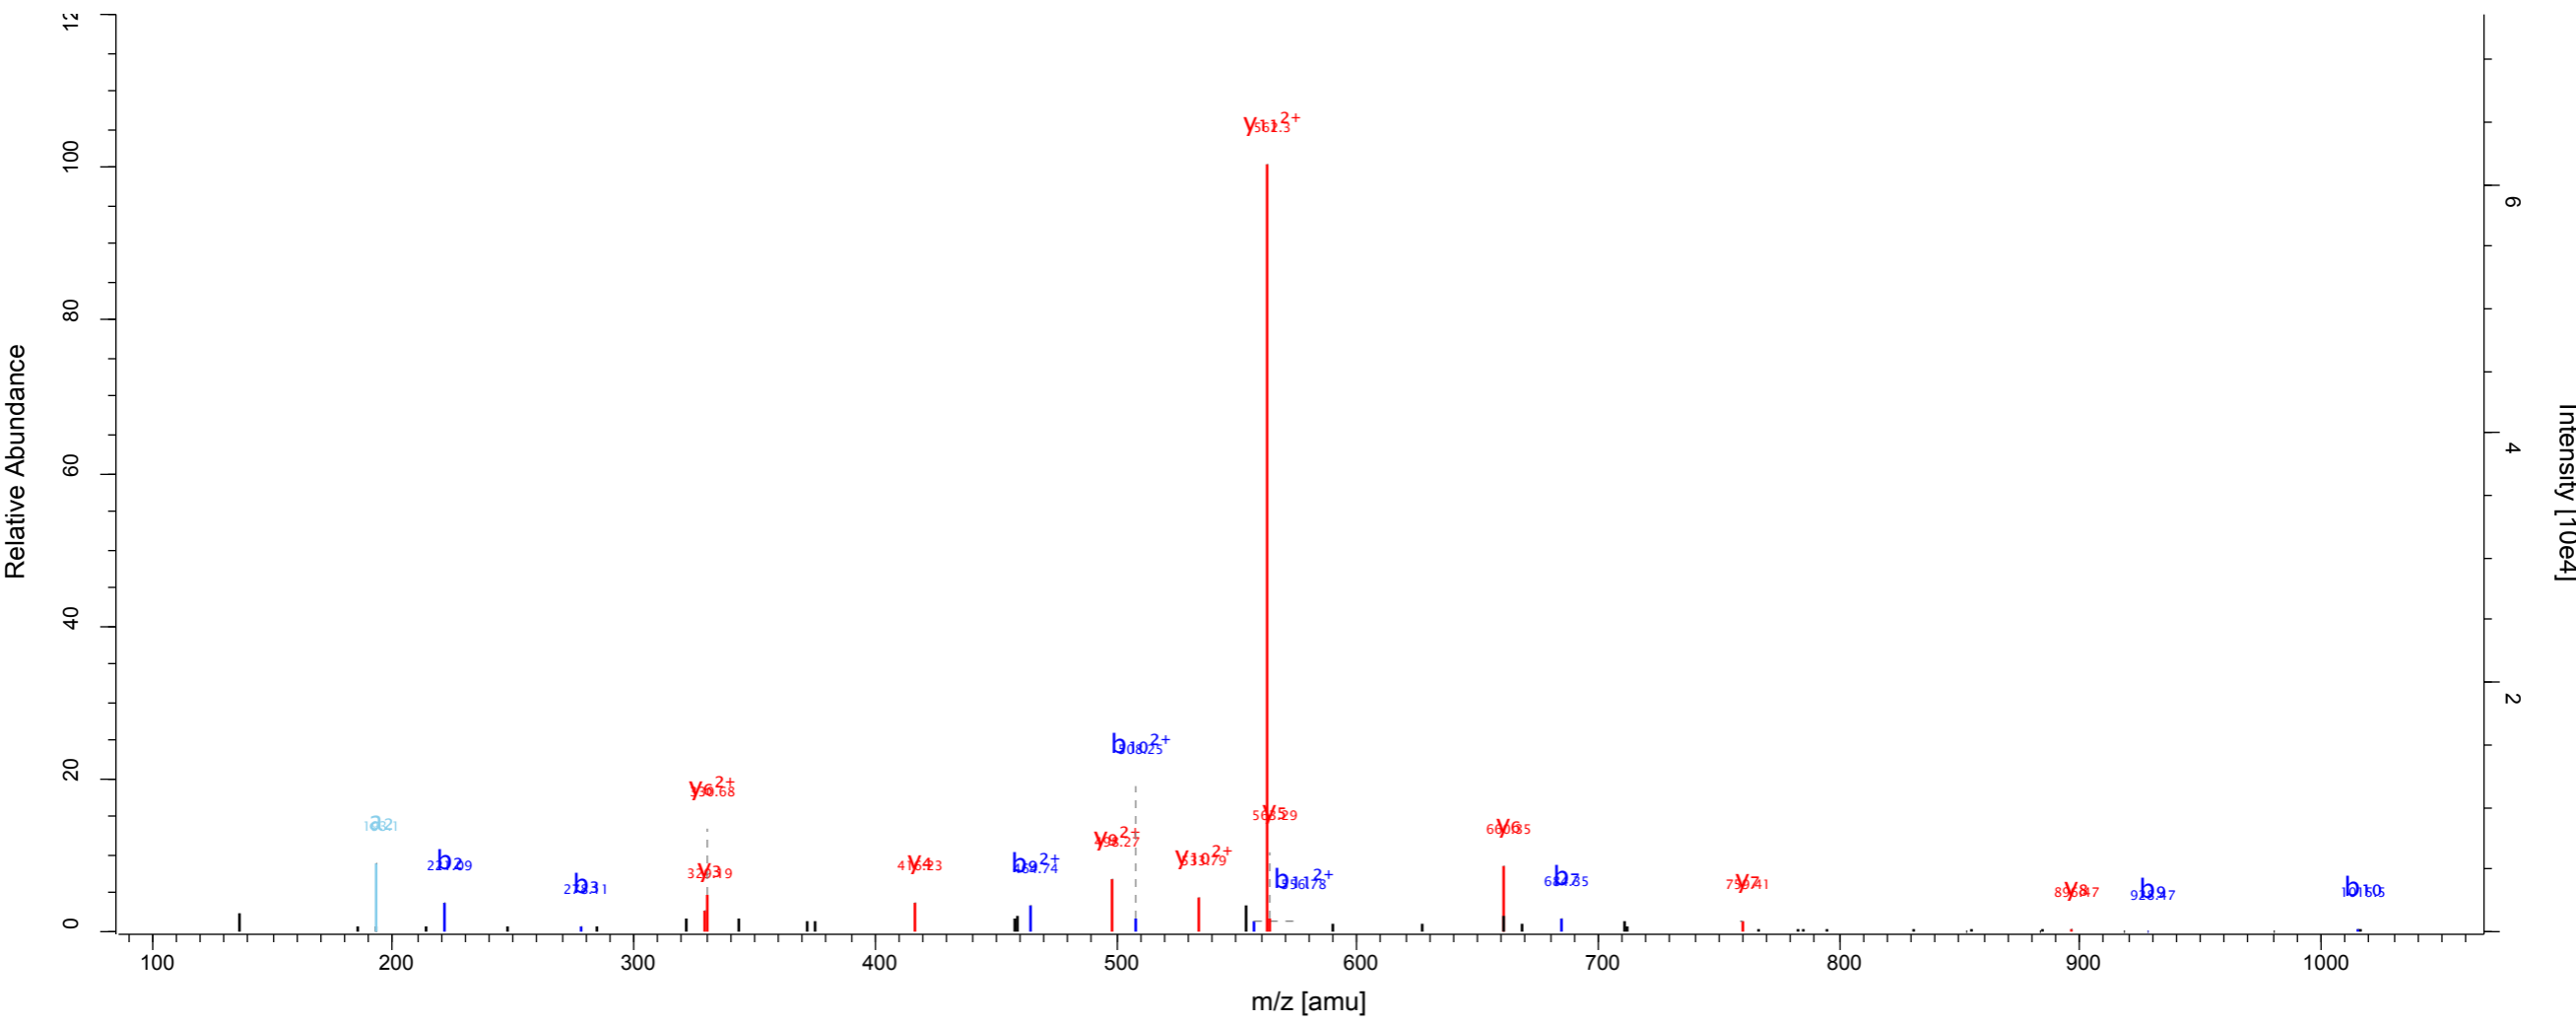

precursor information

|                   |                  |
|-------------------|------------------|
| Mass:             | 1242.67012       |
| m/z:              | 448.56608        |
| Charge:           | 2+               |
| Retention time:   | 50.0686241140002 |
| Score:            | 121.8086         |
| Mass Error (ppm): | 0.67287          |
| PEP:              | 2.4861E-05       |
| Precursor Type:   | MULTI            |

general information

|                       |             |
|-----------------------|-------------|
| Annotation:           | 10 of 12    |
| AminoAcids Coverage:  | 77 %        |
| Intensity Coverage:   | 84 %        |
| Peak Coverage:        | 28 %        |
| Protein Localisation: | 102 ... 114 |

| a ion      |            | b <sup>2+</sup> ion |            | b ion      |            |    |     |    | y ion      |            | y <sup>2+</sup> ion |            |
|------------|------------|---------------------|------------|------------|------------|----|-----|----|------------|------------|---------------------|------------|
| Δ dalton   | mass       | Δ dalton            | mass       | Δ dalton   | mass       |    | seq |    | Δ dalton   | mass       | Δ dalton            | mass       |
|            | 30.0338256 |                     | 58.0287402 |            | 58.0287402 | 1  | G   | 12 |            |            |                     |            |
| +0.0838456 | 193.097154 |                     | 221.092069 | -0.0599337 | 221.092069 | 2  | Y   | 11 | 1286.66403 |            | 1286.66403          |            |
|            | 250.118618 |                     | 278.113532 | +0.0552603 | 278.113532 | 3  | G   | 10 | 1123.6007  |            | 562.30399           | +0.1545673 |
|            | 321.155732 |                     | 349.150646 |            | 349.150646 | 4  | A   | 9  | 1066.57924 |            | 533.793258          | +0.0571449 |
|            | 420.224146 |                     | 448.21906  |            | 448.21906  | 5  | V   | 8  | 995.542126 |            | 498.274701          | +0.128192  |
|            | 557.283057 |                     | 585.277972 |            | 585.277972 | 6  | H   | 7  | 896.473712 | -0.1015804 | 896.473712          |            |
|            | 656.351471 |                     | 684.346386 | -0.0221672 | 684.346386 | 7  | V   | 6  | 759.4148   | +0.2871655 | 759.4148            |            |
|            | 753.404235 |                     | 781.39915  |            | 781.39915  | 8  | P   | 5  | 660.346386 | +0.0002327 | 330.676831          | +0.0132933 |
|            | 900.472649 | -0.4503717          | 464.73742  | -0.0876809 | 928.467564 | 9  | F   | 4  | 563.293622 | +0.178729  | 563.293622          |            |
|            | 987.504677 | +0.3563374          | 508.253434 | -0.1585887 | 1015.49959 | 10 | S   | 3  | 416.225208 | -0.0051764 | 416.225208          |            |
|            | 1084.55744 | +0.4090266          | 556.779816 |            | 1112.55236 | 11 | P   | 2  | 329.19318  | -0.0821568 | 329.19318           |            |
|            | 1141.57891 |                     | 1169.57382 |            | 1169.57382 | 12 | G   | 1  | 232.140416 |            | 232.140416          |            |
|            |            |                     |            |            |            | 13 | R   | 0  | 175.118952 |            | 175.118952          |            |

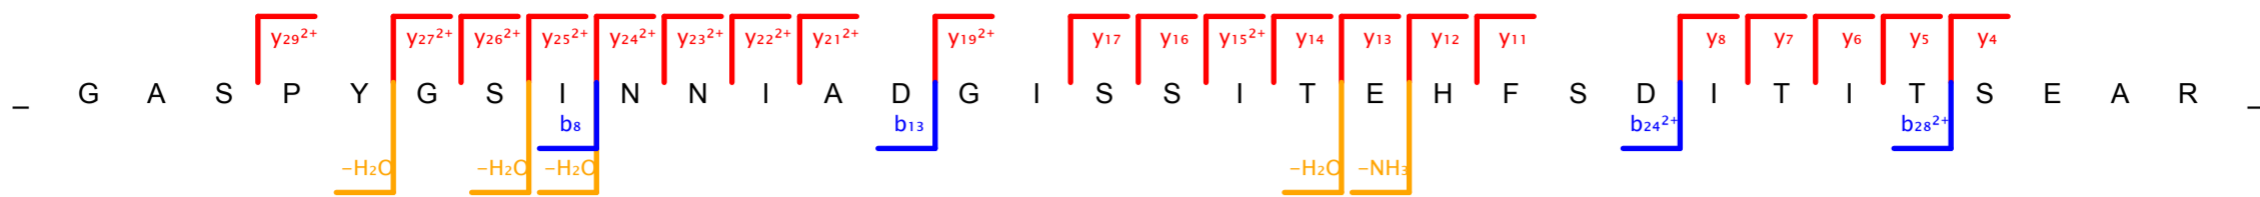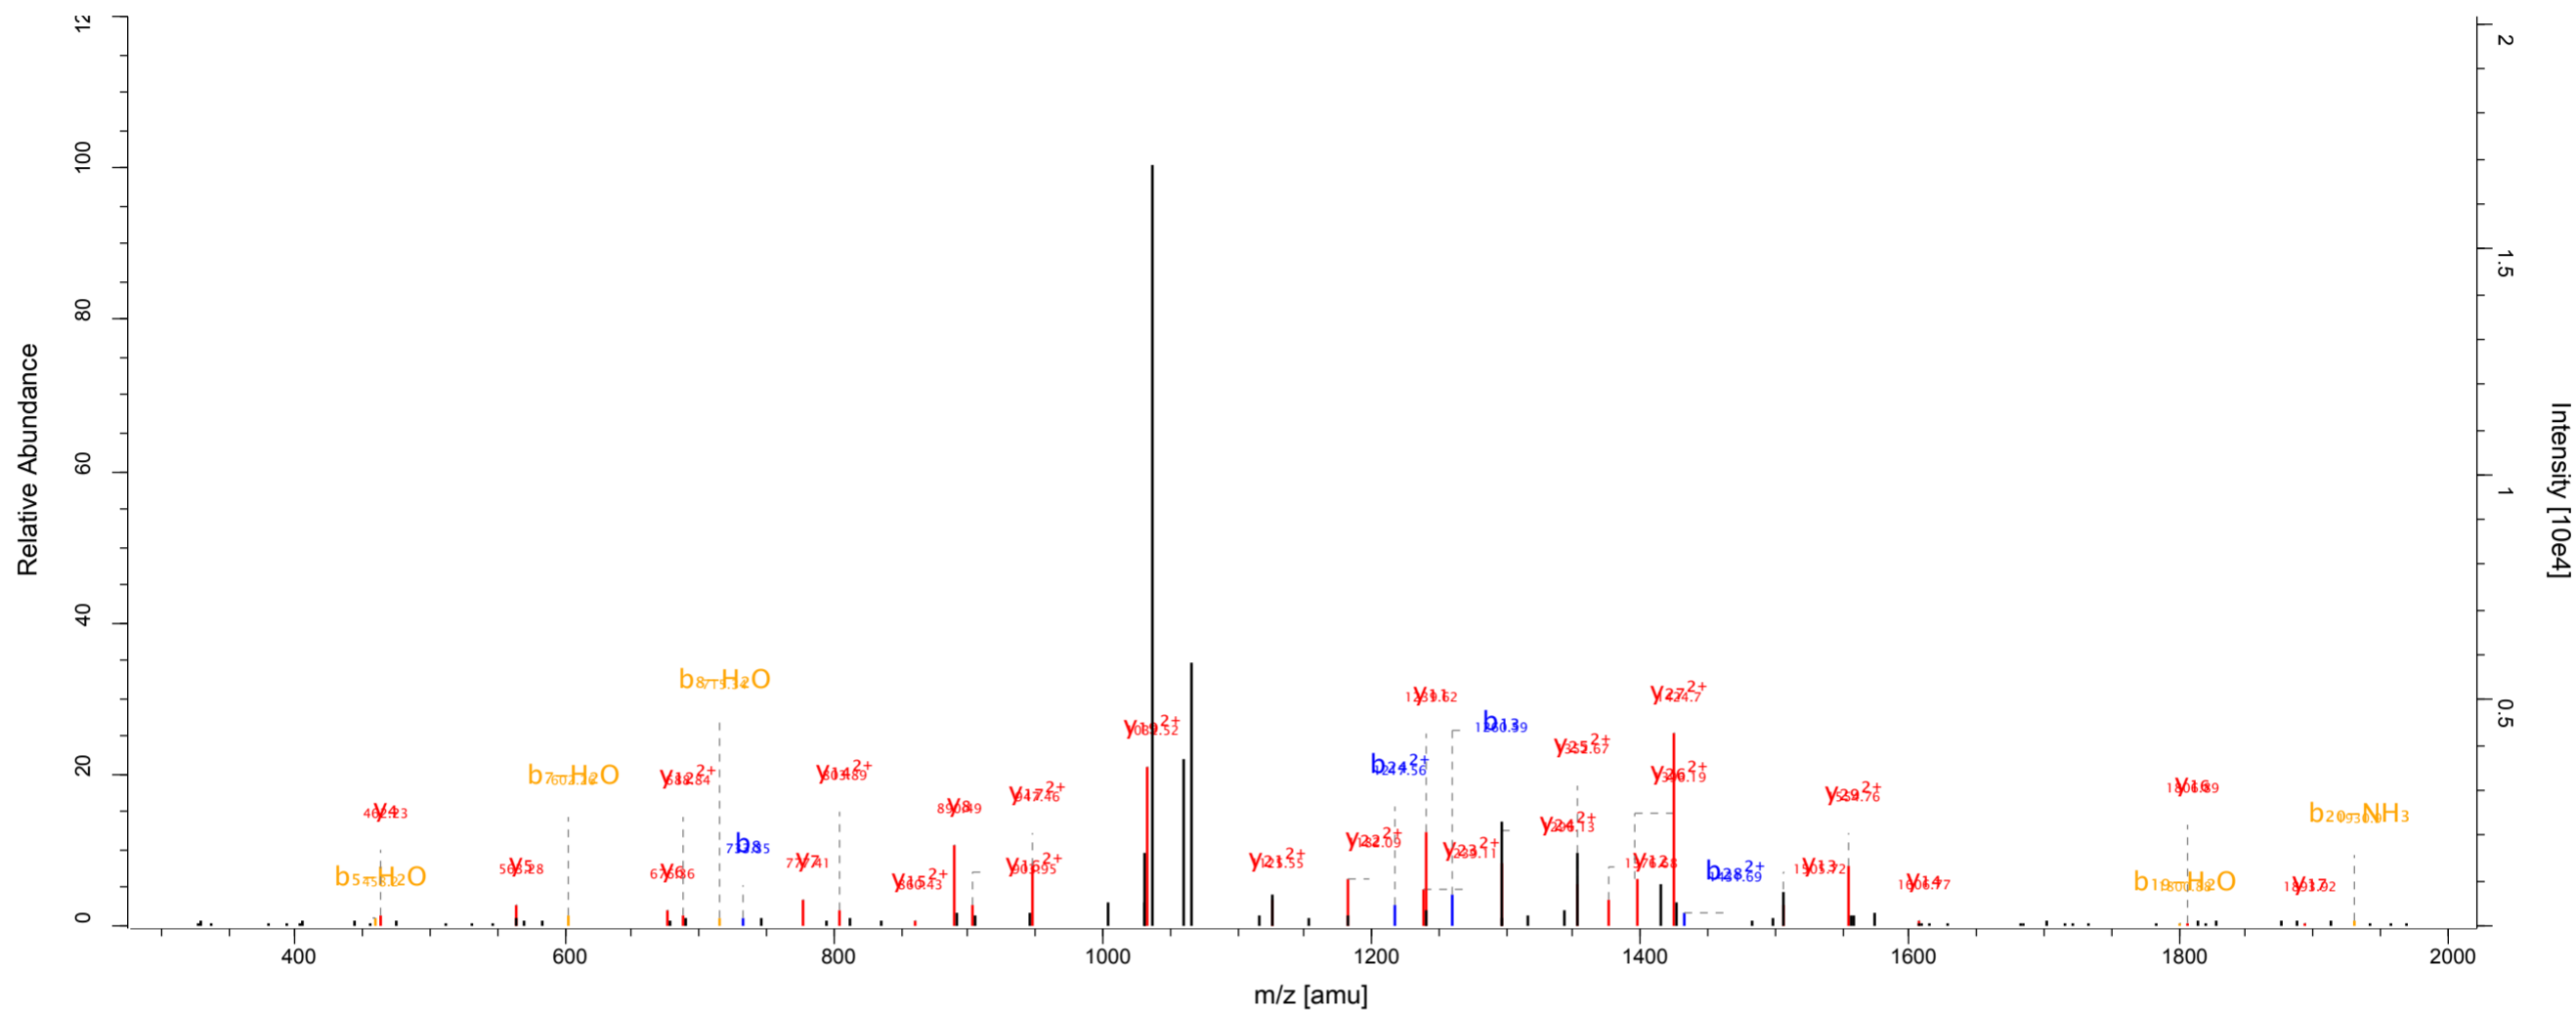

precursor information

|                   |                  |
|-------------------|------------------|
| Mass:             | 3222.50468       |
| m/z:              | 1108.53884       |
| Charge:           | 2+               |
| Retention time:   | 110.278084060824 |
| Score:            | 100.0402         |
| Mass Error (ppm): | 0.20031          |
| PEP:              | 4.2210E-20       |
| Precursor Type:   | MULTI            |

| b <sup>2+</sup> ion |              | b ion      |              |    |     |    | y ion        |            | y <sup>2+</sup> ion |            |
|---------------------|--------------|------------|--------------|----|-----|----|--------------|------------|---------------------|------------|
| Δ dalton            | mass         | Δ dalton   | mass         |    | seq |    | Δ dalton     | mass       | Δ dalton            | mass       |
|                     | 58.02874019  |            | 58.02874019  | 1  | G   | 31 |              |            |                     |            |
|                     | 129.06585398 |            | 129.06585398 | 2  | A   | 30 | 3266.5811561 |            | 3266.5811561        |            |
|                     | 216.09788239 |            | 216.09788239 | 3  | S   | 29 | 3195.5440423 |            | 3195.5440423        |            |
|                     | 313.15064624 |            | 313.15064624 | 4  | P   | 28 | 3108.5120139 |            | 1554.7596452        | +0.2730697 |
|                     | 476.21397478 |            | 476.21397478 | 5  | Y   | 27 | 3011.45925   |            | 3011.45925          |            |
|                     | 533.2354385  |            | 533.2354385  | 6  | G   | 26 | 2848.3959215 |            | 1424.701599         | +0.1846315 |
|                     | 620.26746691 |            | 620.26746691 | 7  | S   | 25 | 2791.3744578 |            | 1396.1908671        | +0.4879659 |
|                     | 733.35153089 | -0.0587452 | 733.35153089 | 8  | I   | 24 | 2704.3424294 |            | 1352.6748529        | -0.0763422 |
|                     | 847.39445834 |            | 847.39445834 | 9  | N   | 23 | 2591.2583654 |            | 1296.1328209        | -0.0929039 |
|                     | 961.43738579 |            | 961.43738579 | 10 | N   | 22 | 2477.2154379 |            | 1239.1113572        | -0.0952439 |
|                     | 1074.5214498 |            | 1074.5214498 | 11 | I   | 21 | 2363.1725105 |            | 1182.0898935        | -0.0234872 |
|                     | 1145.5585636 |            | 1145.5585636 | 12 | A   | 20 | 2250.0884465 |            | 1125.5478615        | -0.0839943 |
|                     | 1260.5855066 | -0.1722986 | 1260.5855066 | 13 | D   | 19 | 2179.0513327 |            | 2179.0513327        |            |
|                     | 1317.6069703 |            | 1317.6069703 | 14 | G   | 18 | 2064.0243897 |            | 1032.5158331        | +0.1736201 |
|                     | 1430.6910343 |            | 1430.6910343 | 15 | I   | 17 | 2007.002926  |            | 2007.002926         |            |
|                     | 1517.7230627 |            | 1517.7230627 | 16 | S   | 16 | 1893.918862  | +0.1774515 | 947.46306922        | +0.2296798 |
|                     | 1604.7550911 |            | 1604.7550911 | 17 | S   | 15 | 1806.8868336 | +0.1408764 | 903.94705502        | -0.0682708 |
|                     | 1717.8391551 |            | 1717.8391551 | 18 | I   | 14 | 1719.8548052 |            | 860.43104081        | -0.1245223 |
|                     | 1818.8868336 |            | 1818.8868336 | 19 | T   | 13 | 1606.7707412 | +0.123668  | 803.88900882        | -0.062959  |
|                     | 1947.9294267 |            | 1947.9294267 | 20 | E   | 12 | 1505.7230627 | +0.094076  | 1505.7230627        |            |
|                     | 2084.9883385 |            | 2084.9883385 | 21 | H   | 11 | 1376.6804696 | +0.1151847 | 688.84387304        | -0.4537363 |
|                     | 2232.0567524 |            | 2232.0567524 | 22 | F   | 10 | 1239.6215577 | +0.0205321 | 1239.6215577        |            |
|                     | 2319.0887808 |            | 2319.0887808 | 23 | S   | 9  | 1092.5531438 |            | 1092.5531438        |            |
| -0.3346935          | 1217.5615002 |            | 2434.1157239 | 24 | D   | 8  | 1005.5211154 |            | 1005.5211154        |            |
|                     | 2547.1997879 |            | 2547.1997879 | 25 | I   | 7  | 890.49417238 | -0.1036695 | 890.49417238        |            |
|                     | 2648.2474663 |            | 2648.2474663 | 26 | T   | 6  | 777.4101084  | +0.0181143 | 777.4101084         |            |
|                     | 2761.3315303 |            | 2761.3315303 | 27 | I   | 5  | 676.36242993 | +0.0028655 | 676.36242993        |            |
| -0.0490776          | 1431.6932426 |            | 2862.3792088 | 28 | T   | 4  | 563.27836595 | -0.0586394 | 563.27836595        |            |
|                     | 2949.4112372 |            | 2949.4112372 | 29 | S   | 3  | 462.23068747 | +0.0739695 | 462.23068747        |            |
|                     | 3078.4538303 |            | 3078.4538303 | 30 | E   | 2  | 375.19865906 |            | 375.19865906        |            |
|                     | 3149.4909441 |            | 3149.4909441 | 31 | A   | 1  | 246.15606597 |            | 246.15606597        |            |
|                     |              |            |              | 32 | R   | 0  | 175.11895218 |            | 175.11895218        |            |

general information

|                       |            |
|-----------------------|------------|
| Annotation:           | 24 of 22   |
| AminoAcids Coverage:  | 75%        |
| Intensity Coverage:   | 28%        |
| Peak Coverage:        | 22%        |
| Protein Localisation: | 91 ... 122 |

Scan number 6948 Raw file 20091021\_Orbi6\_MaHe\_SA\_ADH\_exp3\_30h\_Gel04  
 Method ITMS; CID Genenames FAM109A

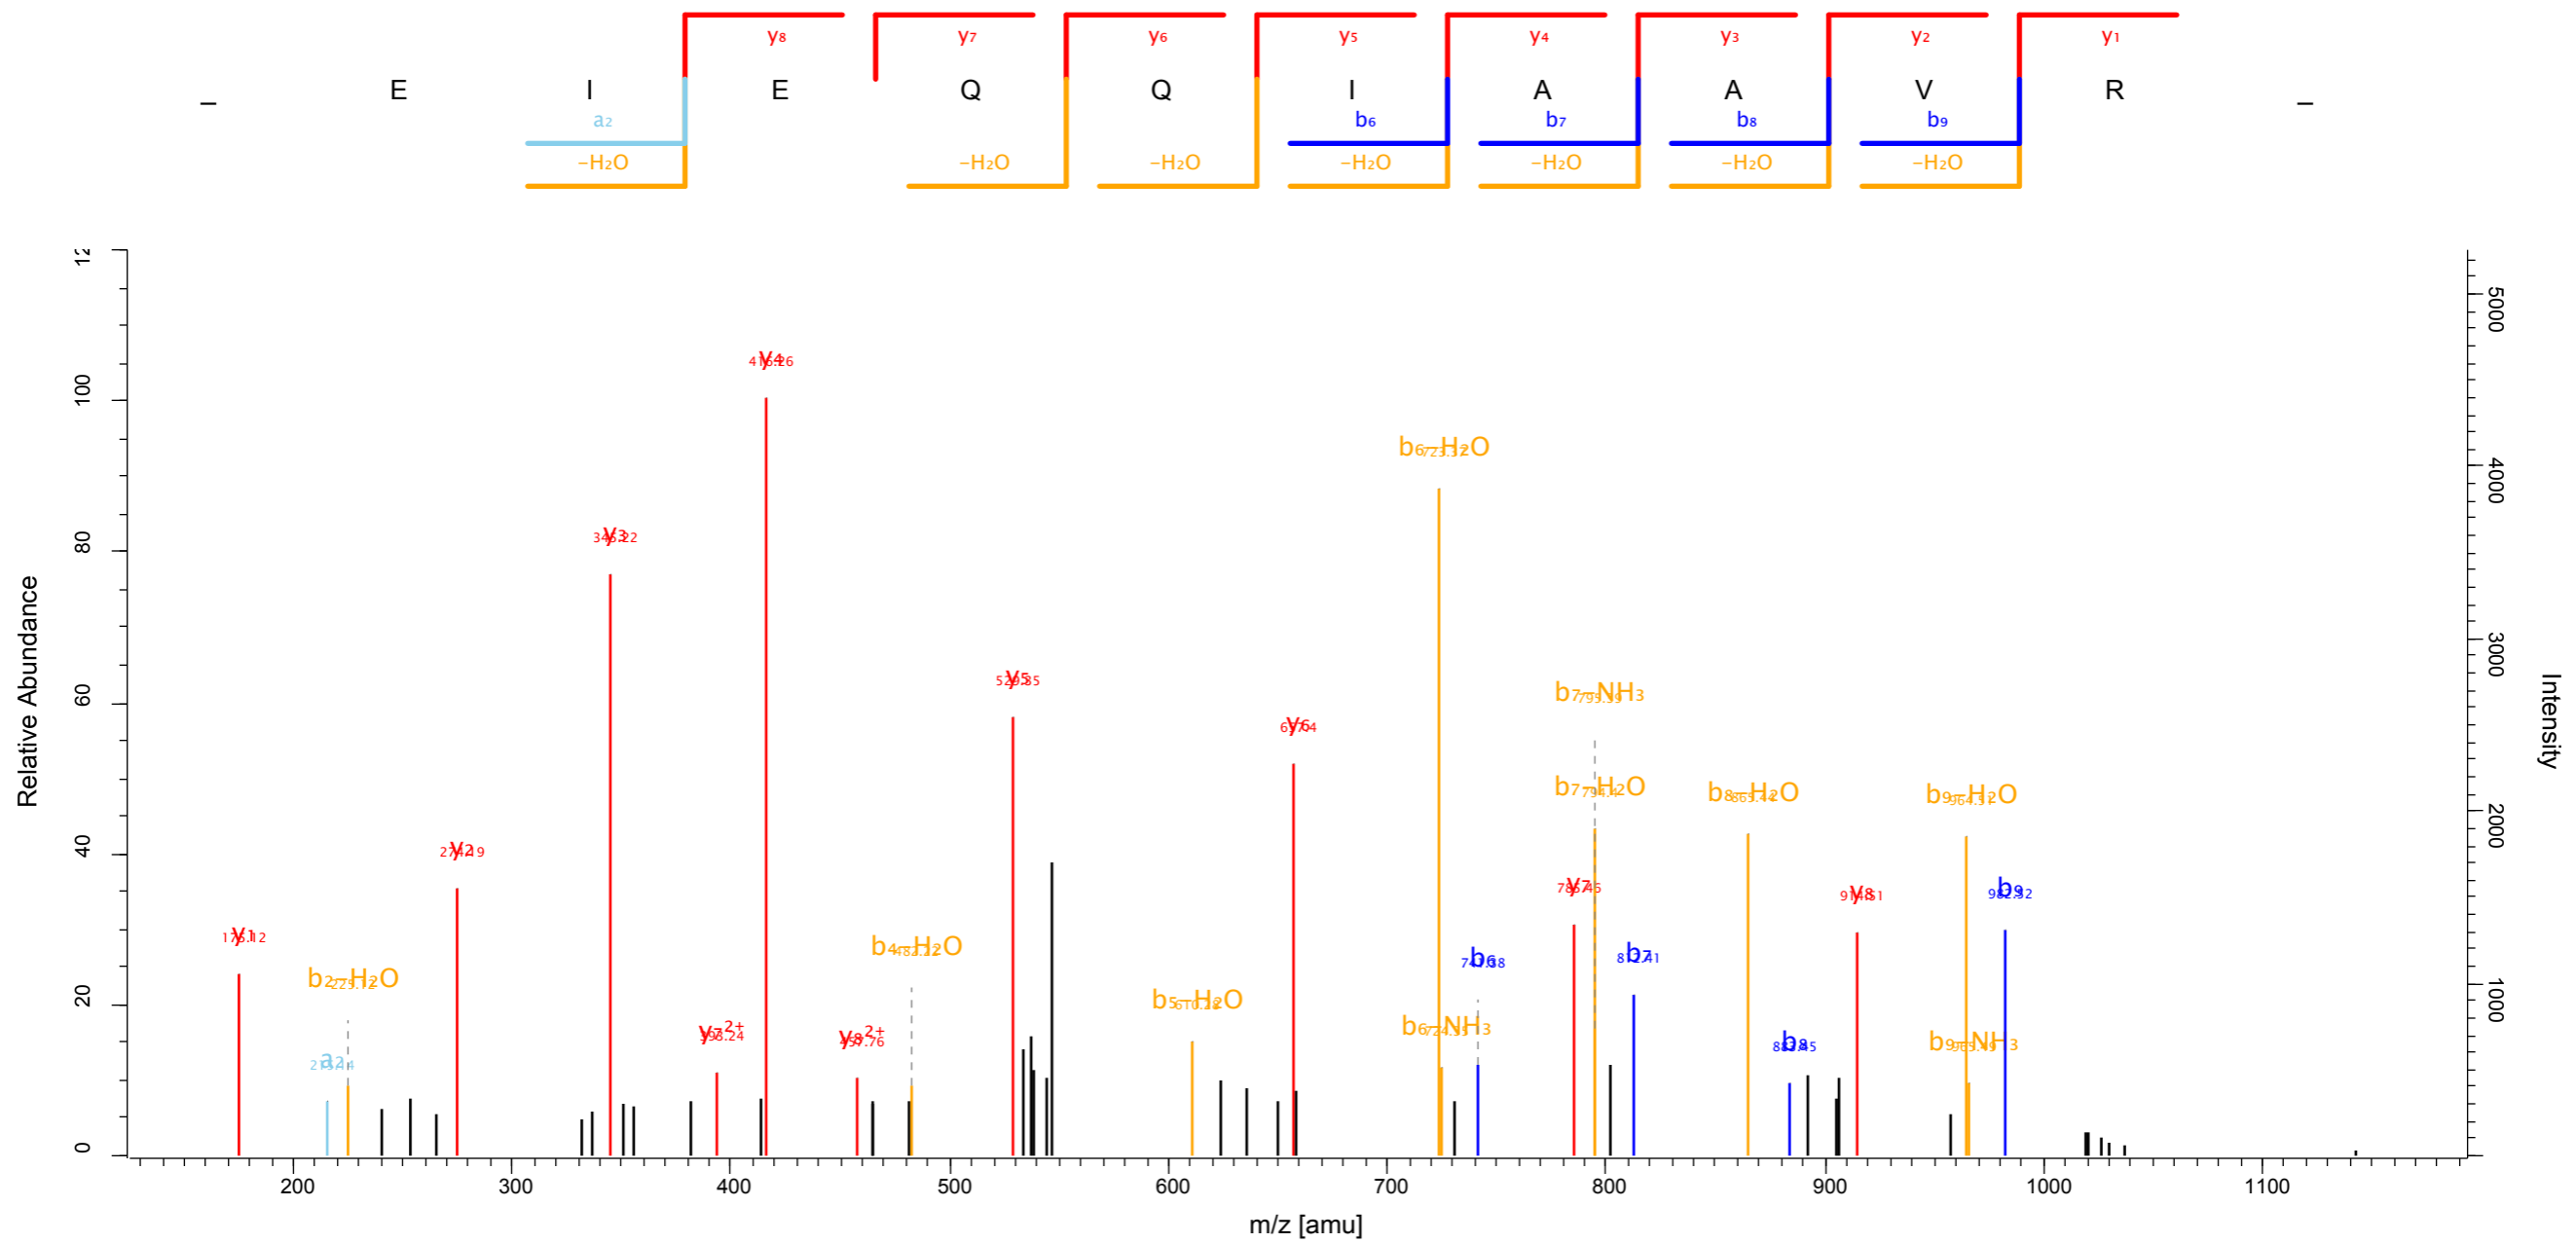

precursor information

|                       |                  |
|-----------------------|------------------|
| Mass:                 | 1155.62461       |
| m/z:                  | 578.81058        |
| Charge:               | 2+               |
| Retention time:       | 17.8646065026855 |
| Score:                | 179.8040         |
| Mass Error (ppm):     | -0.14913         |
| DEP:                  | 6.0006E-07       |
| 96 Precursor Type:    | MULTI            |
| Annotation:           | 0 of 10          |
| AminoAcids Coverage:  | 90 %             |
| Intensity Coverage:   | 75 %             |
| Peak Coverage:        | 43 %             |
| Protein Localisation: | 122 ... 131      |

| a ion      |              | b ion      |              |    |     |   | y ion        |            | y <sup>2+</sup> ion |            |
|------------|--------------|------------|--------------|----|-----|---|--------------|------------|---------------------|------------|
| Δ dalton   | mass         | Δ dalton   | mass         |    | seq |   | Δ dalton     | mass       | Δ dalton            | mass       |
|            | 102.05495494 |            | 130.04986956 | 1  | E   | 9 |              |            |                     |            |
| +0.0326272 | 215.13901892 |            | 243.13393354 | 2  | I   | 8 | 1027.5894698 |            | 1027.5894698        |            |
|            | 344.18161202 |            | 372.17652664 | 3  | E   | 7 | 914.50540577 | -0.0100444 | 457.75634112        | +0.2287663 |
|            | 472.24018953 |            | 500.23510415 | 4  | Q   | 6 | 785.46281268 | +0.0218065 | 393.23504457        | -0.0131818 |
|            | 600.29876704 |            | 628.29368166 | 5  | Q   | 5 | 657.40423516 | +0.0432136 | 657.40423516        |            |
|            | 713.38283102 | -0.1260977 | 741.37774564 | 6  | I   | 4 | 529.34565765 | +0.0492398 | 529.34565765        |            |
|            | 784.41994481 | -0.1511265 | 812.41485943 | 7  | A   | 3 | 416.26159367 | +0.0479156 | 416.26159367        |            |
|            | 855.4570586  | -0.0151446 | 883.45197322 | 8  | A   | 2 | 345.22447988 | +0.0995558 | 345.22447988        |            |
|            | 954.52547251 | -0.1925673 | 982.52038713 | 9  | V   | 1 | 274.1873661  | +0.154858  | 274.1873661         |            |
|            |              |            |              | 10 | R   | 0 | 175.11895218 | +0.0278679 | 175.11895218        |            |

Scan number 17278 Raw file 20091021\_Orbi6\_MaHe\_SA\_ADH\_exp3\_30h\_Gel05  
 Method ITMS; CID Genenames CYB5D2

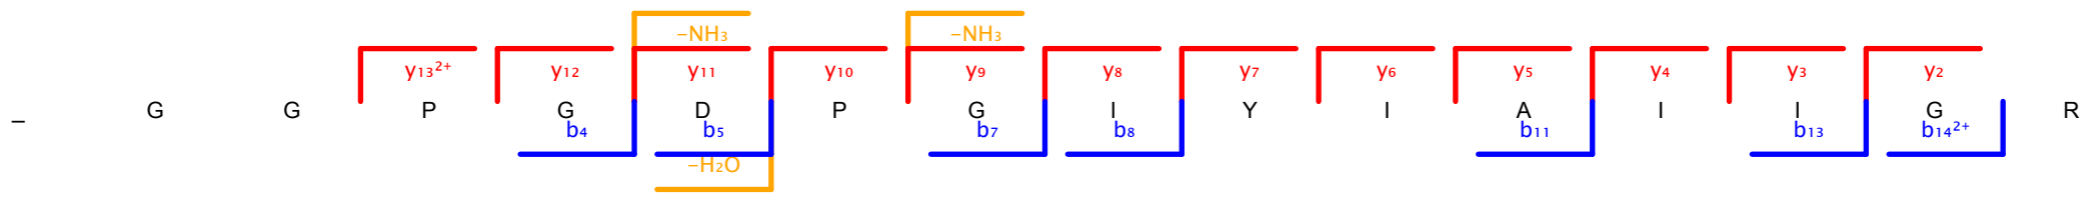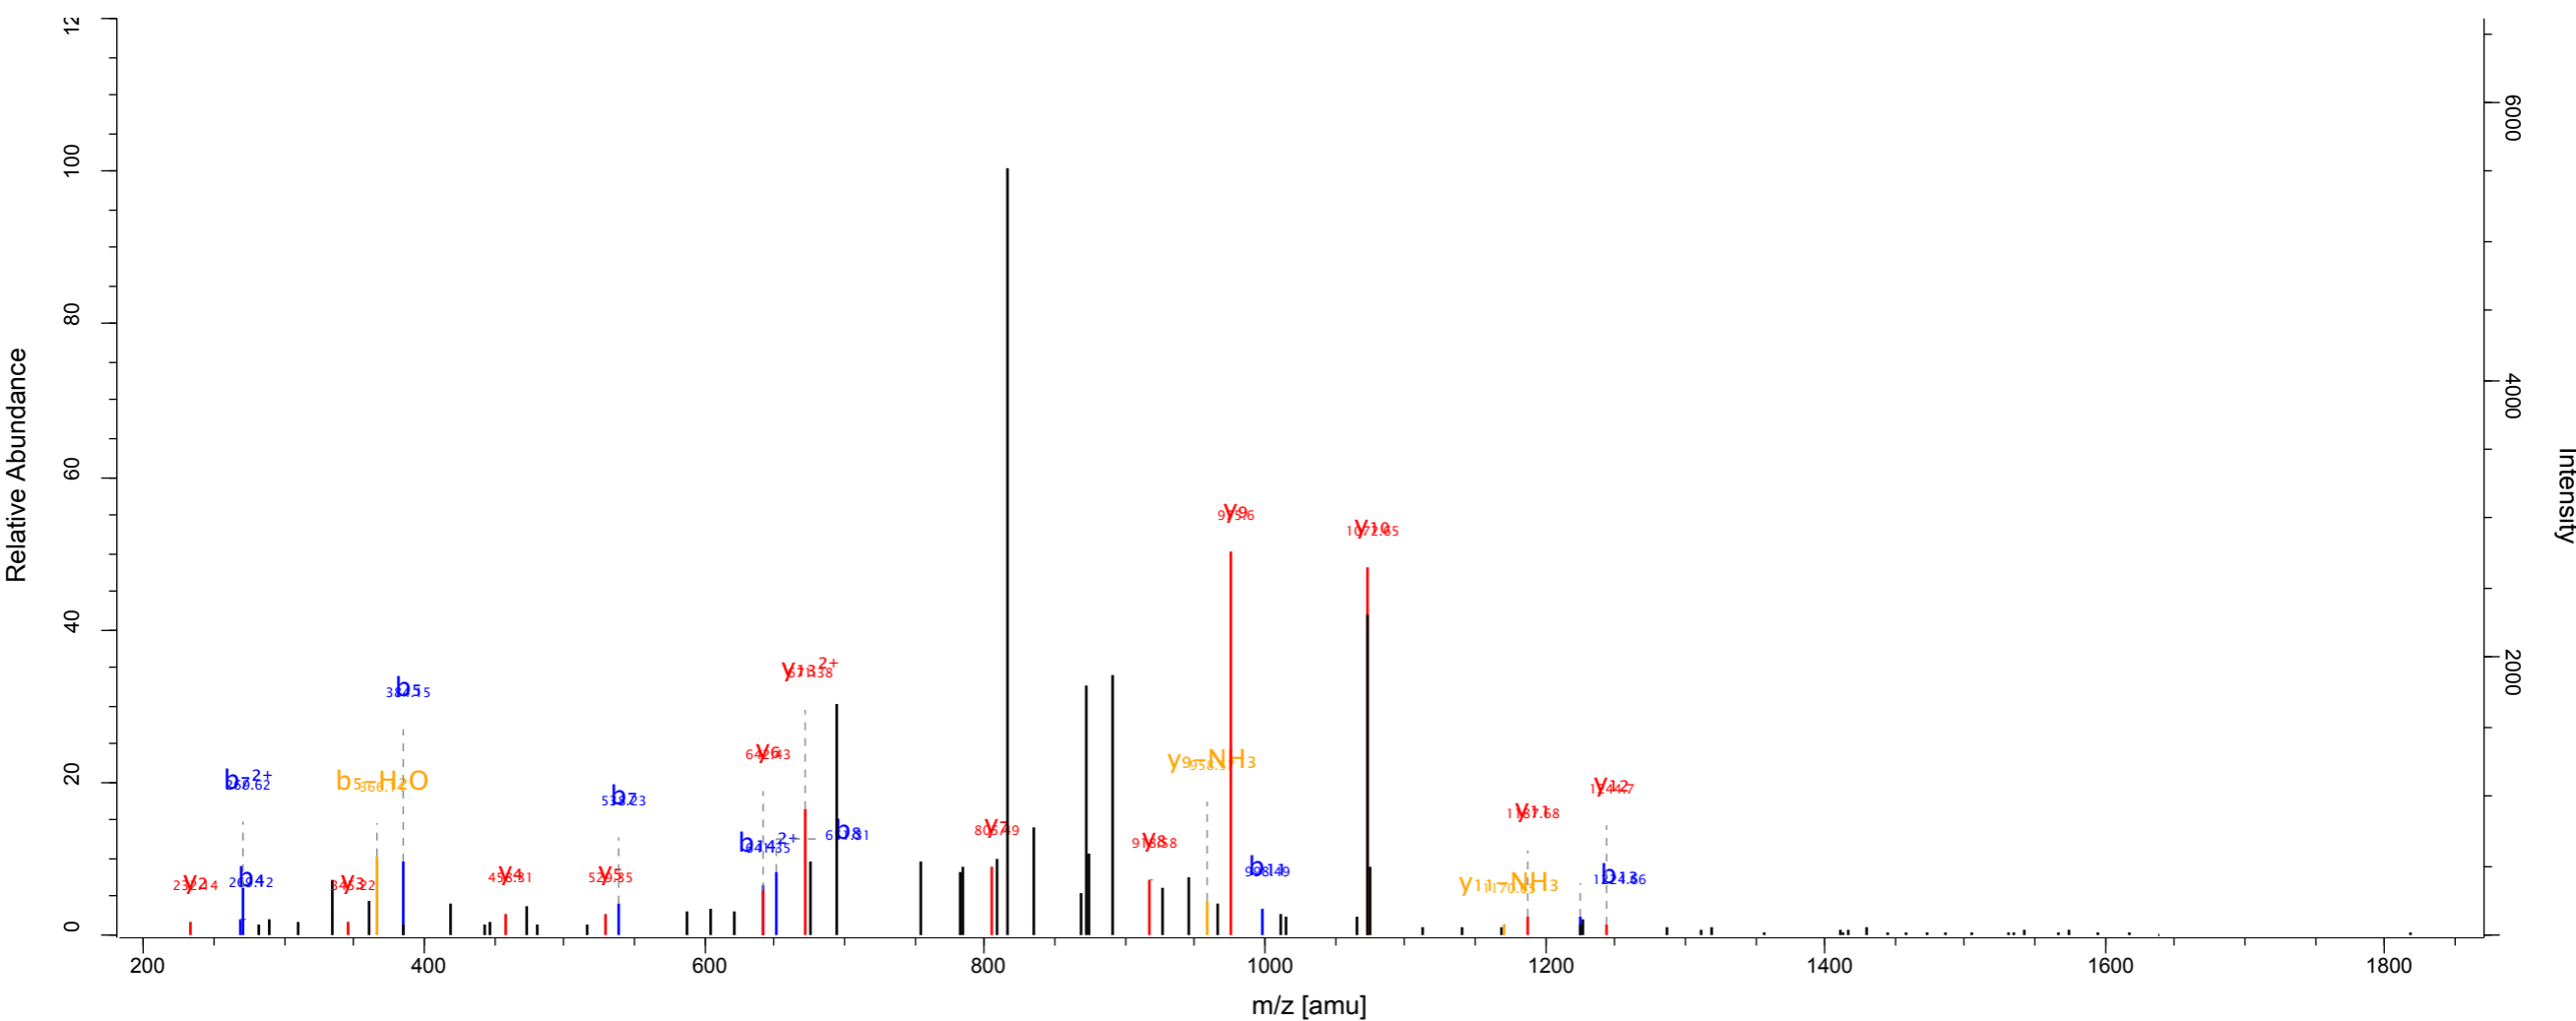

precursor information

|                   |                 |
|-------------------|-----------------|
| Mass:             | 2185.04500      |
| m/z:              | 720.25564       |
| Charge:           | 2+              |
| Potentia time:    | 102.46278226416 |
| Score:            | 120.7806        |
| Mass Error [ppm]: | 0.06024         |
| PEP:              | 7.4685E-20      |
| Precursor Type:   | MULTI           |

general information

|                       |           |
|-----------------------|-----------|
| Annotation:           | 12 of 15  |
| AminoAcids Coverage:  | 80%       |
| Intensity Coverage:   | 24%       |
| Peak Coverage:        | 27%       |
| Protein Localisation: | 48 ... 62 |

| b <sup>2+</sup> ion |              | b ion      |              |    |     |    | y ion        |            | y <sup>2+</sup> ion |           |
|---------------------|--------------|------------|--------------|----|-----|----|--------------|------------|---------------------|-----------|
| Δ dalton            | mass         | Δ dalton   | mass         |    | seq |    | Δ dalton     | mass       | Δ dalton            | mass      |
|                     | 58.02874019  |            | 58.02874019  | 1  | G   | 14 |              |            |                     |           |
|                     | 115.05020391 |            | 115.05020391 | 2  | G   | 13 | 1398.7739761 |            | 1398.7739761        |           |
|                     | 212.10296777 |            | 212.10296777 | 3  | P   | 12 | 1341.7525123 |            | 671.3798944         | +0.355152 |
|                     | 269.12443149 | -0.014202  | 269.12443149 | 4  | G   | 11 | 1244.6997485 | +0.1592603 | 1244.6997485        |           |
|                     | 384.15137452 | +0.0534595 | 384.15137452 | 5  | D   | 10 | 1187.6782848 | +0.1508168 | 1187.6782848        |           |
|                     | 481.20413837 |            | 481.20413837 | 6  | P   | 9  | 1072.6513417 | -0.0484365 | 1072.6513417        |           |
| +0.460465           | 269.61643928 | +0.3606406 | 538.2256021  | 7  | G   | 8  | 975.59857788 | -0.487738  | 975.59857788        |           |
|                     | 651.30966608 | -0.3088726 | 651.30966608 | 8  | I   | 7  | 918.57711415 | -0.3005028 | 918.57711415        |           |
|                     | 814.37299462 |            | 814.37299462 | 9  | Y   | 6  | 805.49305017 | -0.0780721 | 805.49305017        |           |
|                     | 927.4570586  |            | 927.4570586  | 10 | I   | 5  | 642.42972163 | -0.1084936 | 642.42972163        |           |
|                     | 998.49417238 | +0.107207  | 998.49417238 | 11 | A   | 4  | 529.34565765 | +0.145065  | 529.34565765        |           |
|                     | 1111.5782364 |            | 1111.5782364 | 12 | I   | 3  | 458.30854387 | +0.0780528 | 458.30854387        |           |
|                     | 1224.6623003 | -0.146065  | 1224.6623003 | 13 | I   | 2  | 345.22447988 | +0.1075514 | 345.22447988        |           |
| -0.3073733          | 641.34552027 |            | 1281.6837641 | 14 | G   | 1  | 232.1404159  | +0.0518143 | 232.1404159         |           |
|                     |              |            |              | 15 | R   | 0  | 175.11895218 |            | 175.11895218        |           |

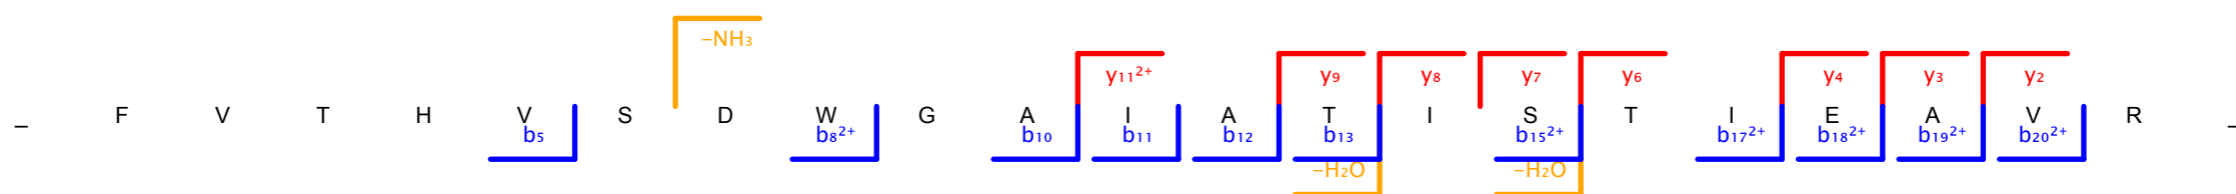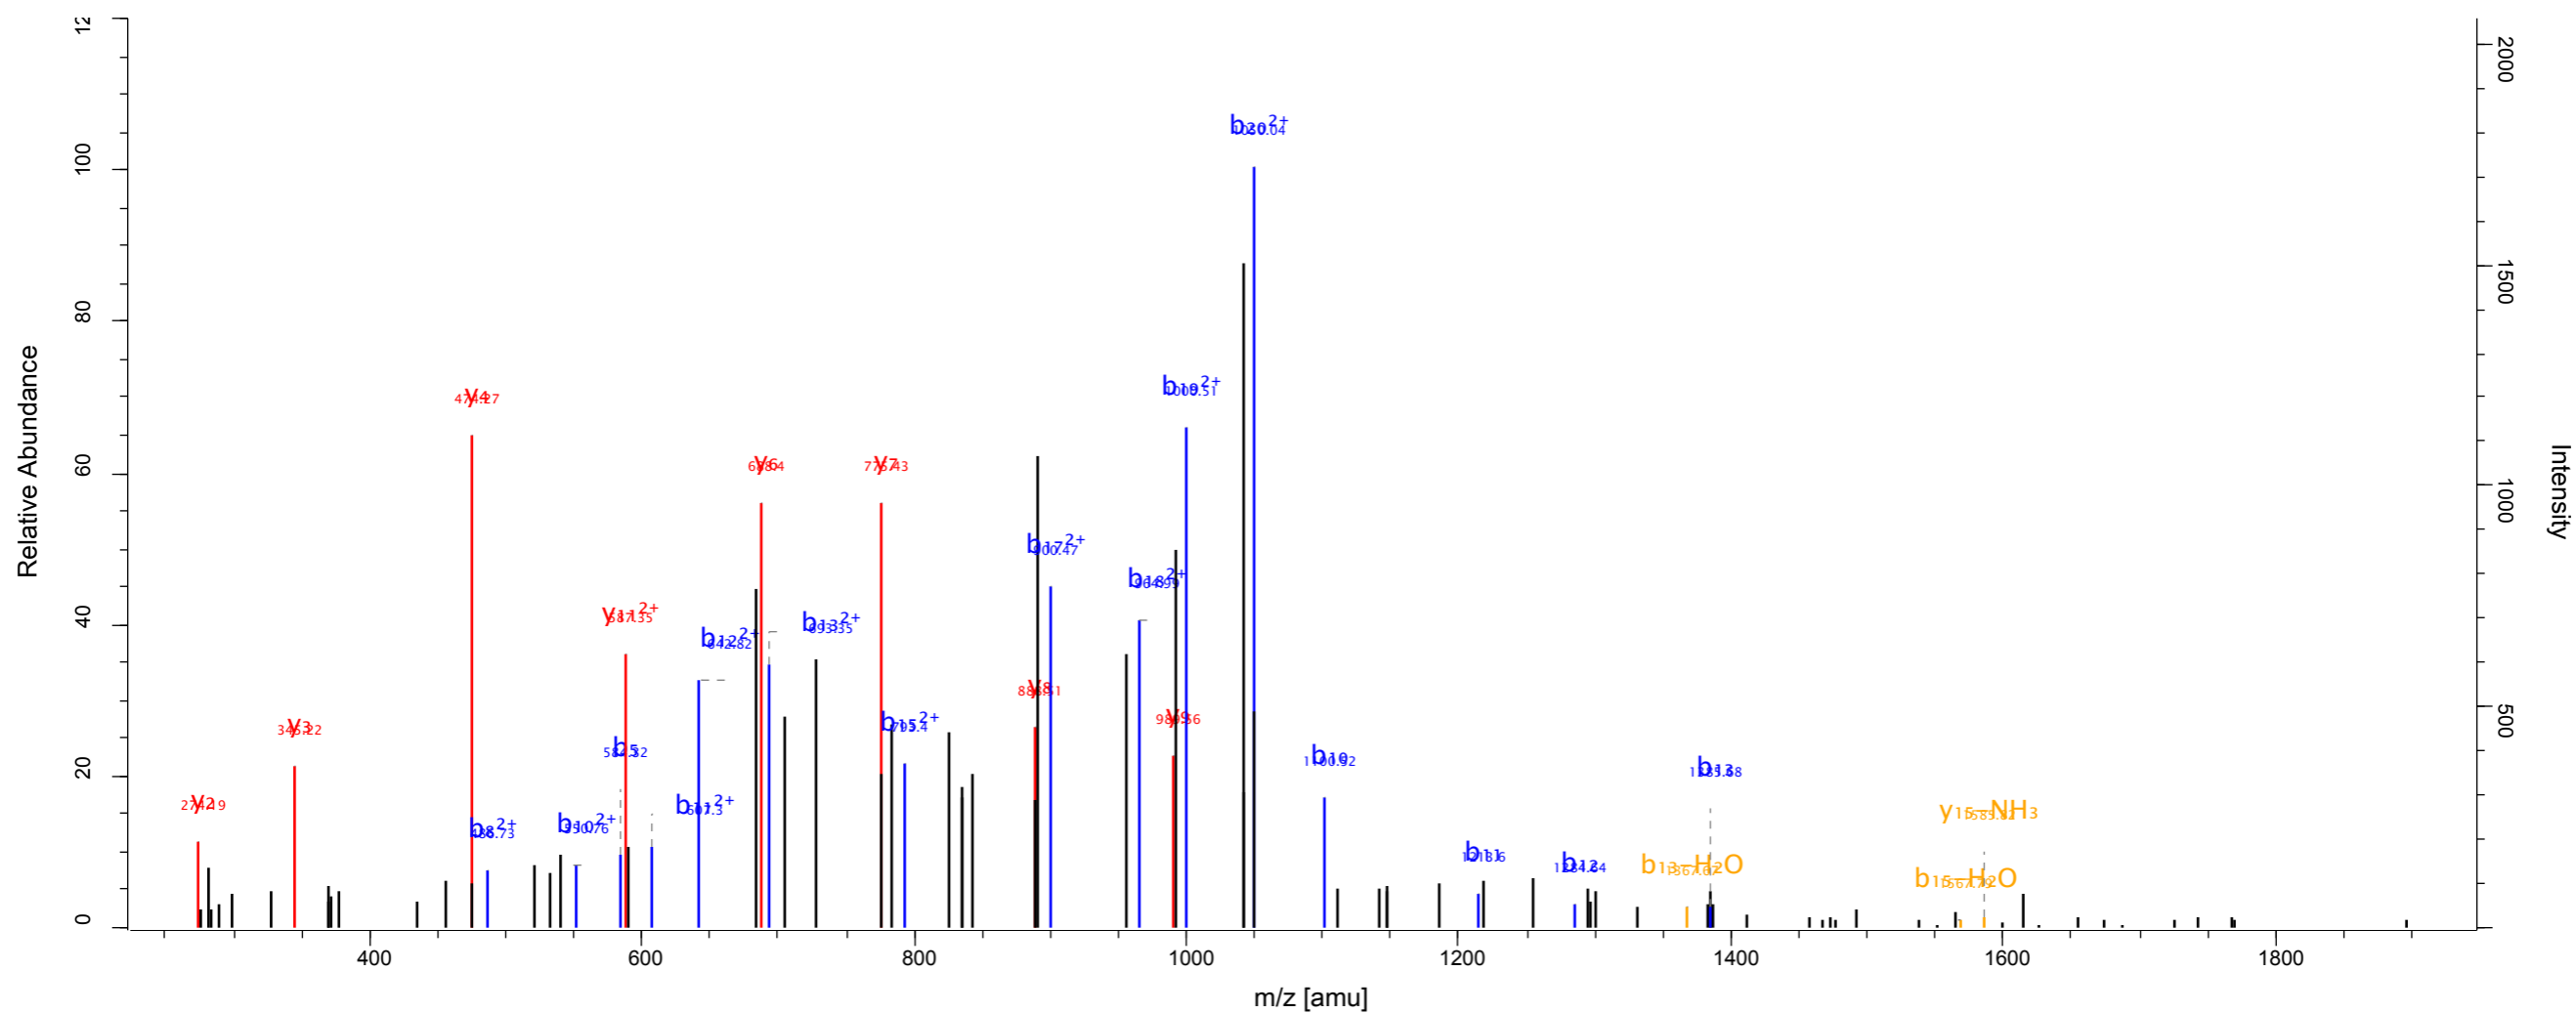

precursor information

|                   |                  |
|-------------------|------------------|
| Mass:             | 2272.18502       |
| m/z:              | 758.40258        |
| Charge:           | 2                |
| Potenttime:       | 107.025575256248 |
| Score:            | 125.0752         |
| Mass Error (ppm): | 0.22710          |
| PEP:              | 7.4677E-15       |
| Precursor Type:   | MULTI            |

| b <sup>2+</sup> ion |              | b ion      |              |    |     |    | y ion        |            | y <sup>2+</sup> ion |            |
|---------------------|--------------|------------|--------------|----|-----|----|--------------|------------|---------------------|------------|
| Δ dalton            | mass         | Δ dalton   | mass         |    | seq |    | Δ dalton     | mass       | Δ dalton            | mass       |
|                     | 148.07569038 |            | 148.07569038 | 1  | F   | 20 |              |            |                     |            |
|                     | 247.1441043  |            | 247.1441043  | 2  | V   | 19 | 2126.1240441 |            | 2126.1240441        |            |
|                     | 348.19178277 |            | 348.19178277 | 3  | T   | 18 | 2027.0556302 |            | 2027.0556302        |            |
|                     | 485.25069464 |            | 485.25069464 | 4  | H   | 17 | 1926.0079518 |            | 1926.0079518        |            |
|                     | 584.31910855 | -0.1587692 | 584.31910855 | 5  | V   | 16 | 1788.9490399 |            | 1788.9490399        |            |
|                     | 671.35113696 |            | 671.35113696 | 6  | S   | 15 | 1689.880626  |            | 1689.880626         |            |
|                     | 786.37807999 |            | 786.37807999 | 7  | D   | 14 | 1602.8485976 |            | 1602.8485976        |            |
| -0.4254499          | 486.73233471 |            | 972.45739295 | 8  | W   | 13 | 1487.8216545 |            | 1487.8216545        |            |
|                     | 1029.4788567 |            | 1029.4788567 | 9  | G   | 12 | 1301.7423416 |            | 1301.7423416        |            |
| +0.1278419          | 550.76162346 | +0.0555627 | 1100.5159705 | 10 | A   | 11 | 1244.7208779 |            | 1244.7208779        |            |
| +0.1209661          | 607.30365545 | -0.0326516 | 1213.600344  | 11 | I   | 10 | 1173.6837641 |            | 587.34552027        | -0.0494387 |
| -0.1491166          | 642.82221235 | -0.1052879 | 1284.6371482 | 12 | A   | 9  | 1060.5997001 |            | 1060.5997001        |            |
| -0.226972           | 693.34605158 | +0.1277954 | 1385.6848267 | 13 | T   | 8  | 989.5625863  | -0.0633798 | 989.5625863         |            |
|                     | 1498.7688907 |            | 1498.7688907 | 14 | I   | 7  | 888.51490783 | -0.0531769 | 888.51490783        |            |
| -0.144088           | 793.40409778 |            | 1585.8009191 | 15 | S   | 6  | 775.43084385 | +0.0491977 | 775.43084385        |            |
|                     | 1686.8485976 |            | 1686.8485976 | 16 | T   | 5  | 688.39881544 | -0.017895  | 688.39881544        |            |
| +0.1716326          | 900.46996901 |            | 1799.9326615 | 17 | I   | 4  | 587.35113696 |            | 587.35113696        |            |
| +0.2496402          | 964.99126555 |            | 1928.9752546 | 18 | E   | 3  | 474.26707298 | -0.0496047 | 474.26707298        |            |
| -0.1000934          | 1000.5098224 |            | 2000.0123684 | 19 | A   | 2  | 345.22447988 | -0.1020434 | 345.22447988        |            |
| -0.1650011          | 1050.0440294 |            | 2099.0807823 | 20 | V   | 1  | 274.1873661  | +0.0203365 | 274.1873661         |            |
|                     |              |            |              | 21 | R   | 0  | 175.11895218 |            | 175.11895218        |            |

general information

|                       |           |
|-----------------------|-----------|
| Annotation:           | 15 of 21  |
| AminoAcids Coverage:  | 71.0%     |
| Intensity Coverage:   | 40.0%     |
| Peak Coverage:        | 28.0%     |
| Protein Localisation: | 61 ... 81 |

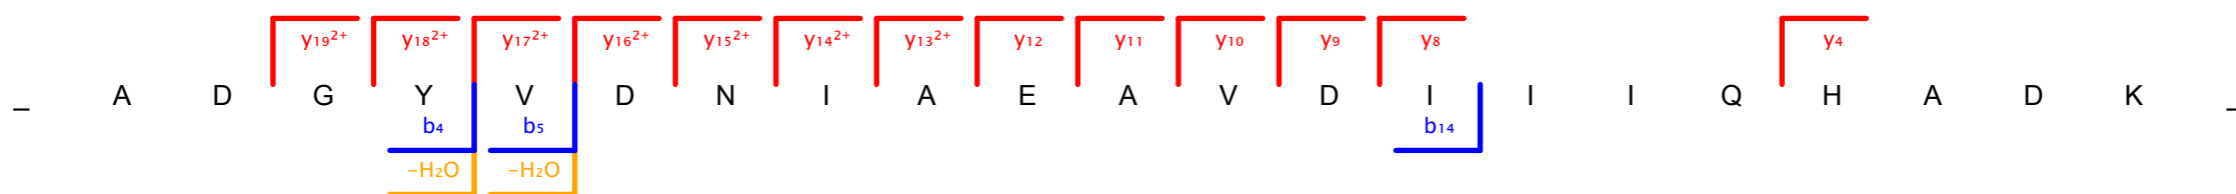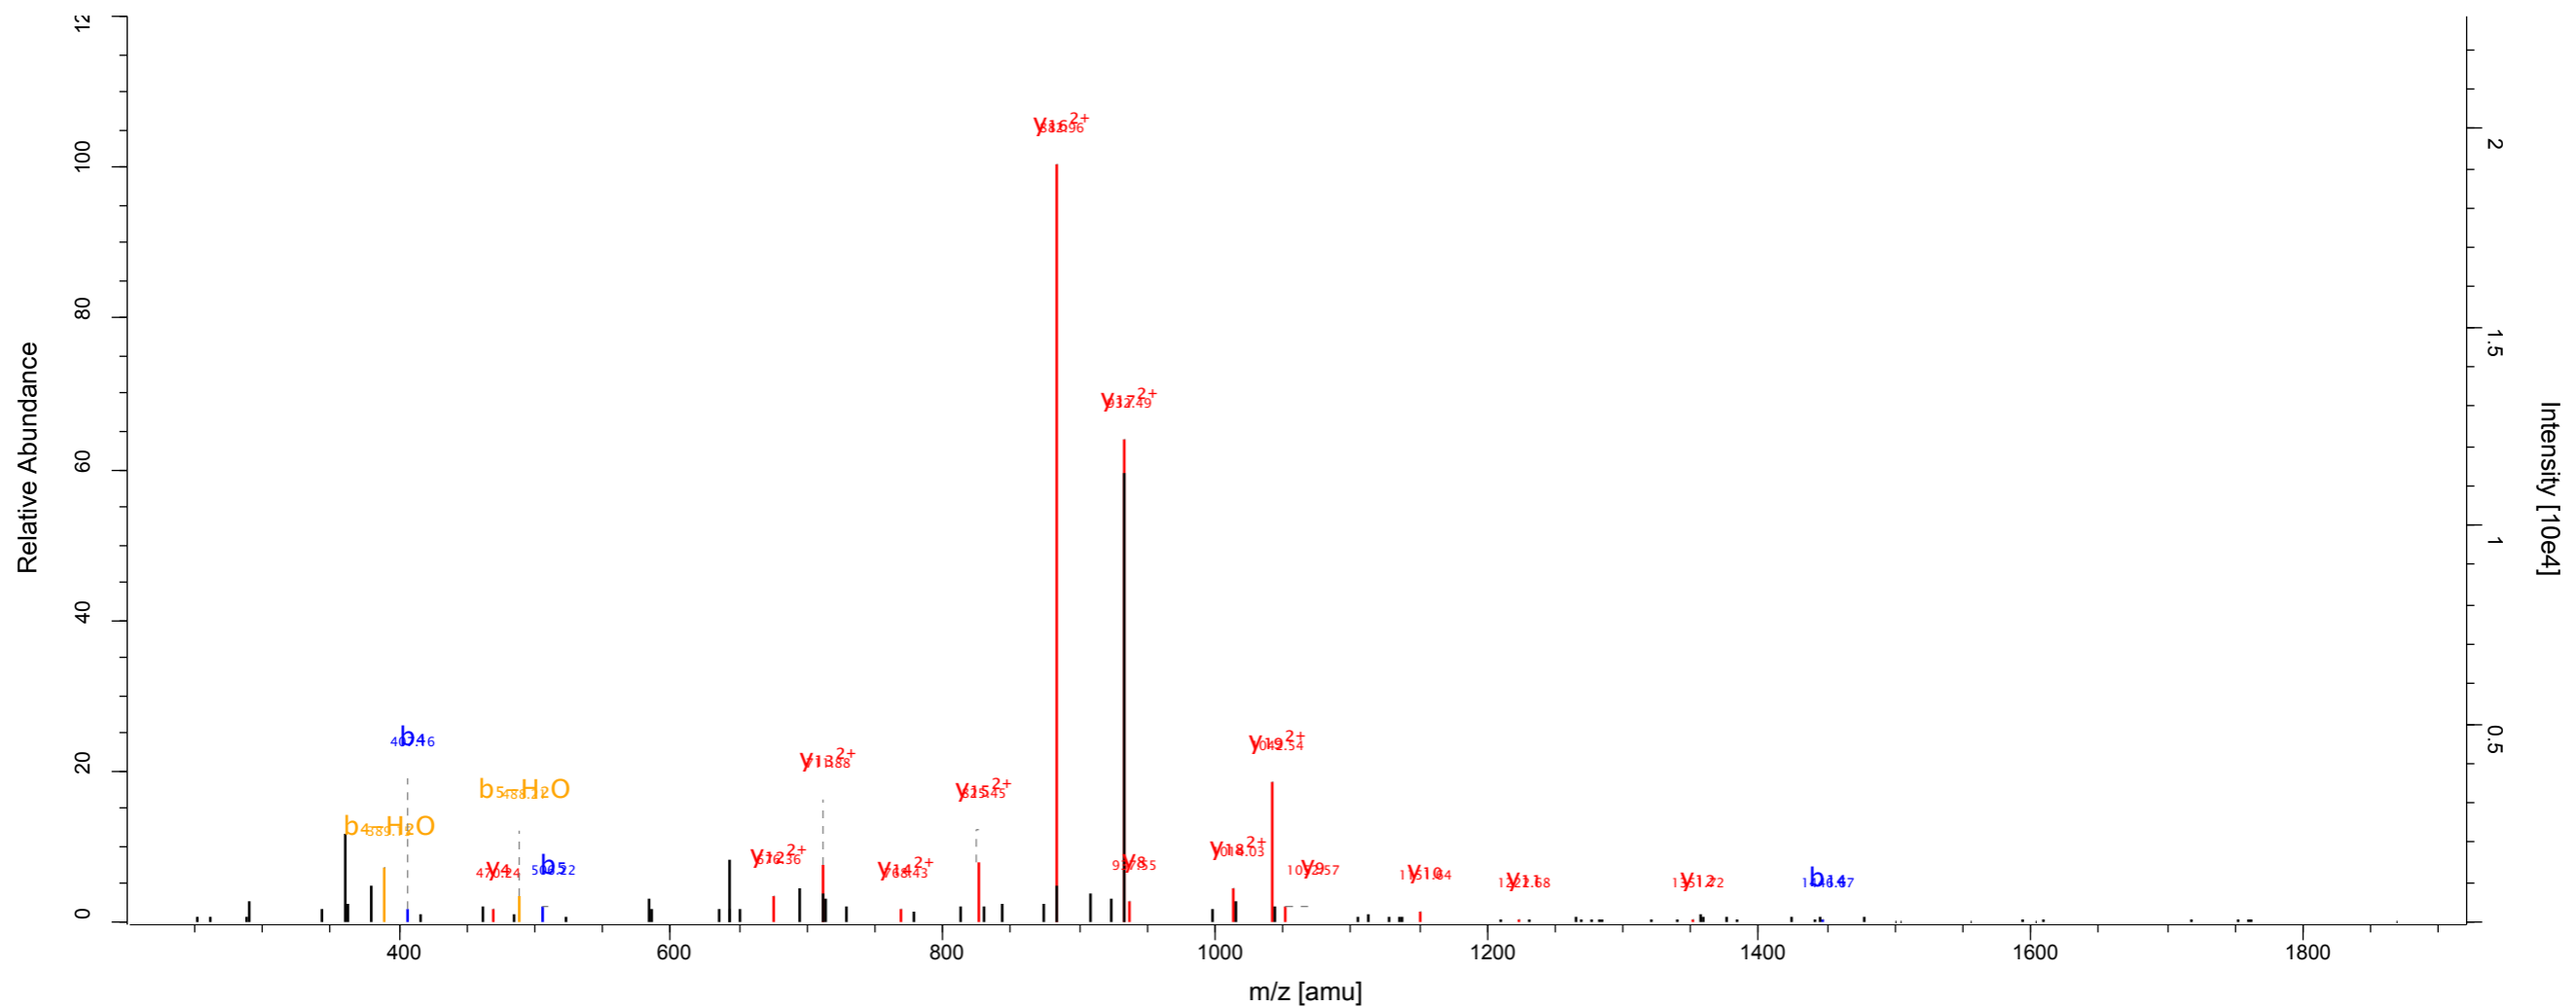

precursor information

|                   |                 |
|-------------------|-----------------|
| Mass:             | 2260.12157      |
| m/z:              | 757.28112       |
| Charge:           | 2               |
| Potenttime:       | 110.84642701748 |
| Score:            | 70.80228        |
| Mass Error [ppm]: | -0.47242        |
| DEP:              | 0.00022752      |
| Precursor Type:   | MULTI           |

| b ion      |                |    |     |    | y ion          |            | y <sup>2+</sup> ion |            |
|------------|----------------|----|-----|----|----------------|------------|---------------------|------------|
| Δ dalton   | mass           |    | seq |    | Δ dalton       | mass       | Δ dalton            | mass       |
|            | 72.044390254   | 1  | A   | 20 |                |            |                     |            |
|            | 187.071333286  | 2  | D   | 19 | 2199.092803595 |            | 2199.092803595      |            |
|            | 244.09279701   | 3  | G   | 18 | 2084.065860563 |            | 1042.536568515      | +0.2045204 |
| +0.0894799 | 407.156125548  | 4  | Y   | 17 | 2027.04439684  |            | 1014.025836653      | -0.0573308 |
| -0.1623446 | 506.224539464  | 5  | V   | 16 | 1863.981068301 |            | 932.494172384       | -0.0227368 |
|            | 621.251482496  | 6  | D   | 15 | 1764.912654385 |            | 882.959965426       | +0.2667802 |
|            | 735.294409944  | 7  | N   | 14 | 1649.885711353 |            | 825.44649391        | +0.1654446 |
|            | 848.378473924  | 8  | I   | 13 | 1535.842783906 |            | 768.425030186       | -0.0703549 |
|            | 919.415587712  | 9  | A   | 12 | 1422.758719925 |            | 711.882998196       | -0.0245387 |
|            | 1048.458180808 | 10 | E   | 11 | 1351.721606138 | -0.0778073 | 676.364441302       | +0.1235348 |
|            | 1119.495294596 | 11 | A   | 10 | 1222.679013041 | -0.1240814 | 1222.679013041      |            |
|            | 1218.563708512 | 12 | V   | 9  | 1151.641899254 | +0.1247023 | 1151.641899254      |            |
|            | 1333.590651544 | 13 | D   | 8  | 1052.573485337 | -0.2446279 | 1052.573485337      |            |
| +0.1982093 | 1446.674715524 | 14 | I   | 7  | 937.546542305  | -0.0326873 | 937.546542305       |            |
|            | 1559.758779505 | 15 | I   | 6  | 824.462478325  |            | 824.462478325       |            |
|            | 1672.842843485 | 16 | I   | 5  | 711.378414345  |            | 711.378414345       |            |
|            | 1800.901420997 | 17 | Q   | 4  | 598.294350364  |            | 598.294350364       |            |
|            | 1937.960332859 | 18 | H   | 3  | 470.235772853  | -0.0114687 | 470.235772853       |            |
|            | 2008.997446647 | 19 | A   | 2  | 333.17686099   |            | 333.17686099        |            |
|            | 2124.024389679 | 20 | D   | 1  | 262.139747203  |            | 262.139747203       |            |
|            |                | 21 | K   | 0  | 147.112804171  |            | 147.112804171       |            |

general information

|                       |             |
|-----------------------|-------------|
| Annotation:           | 14 of 21    |
| AminoAcids Coverage:  | 67%         |
| Intensity Coverage:   | 50%         |
| Peak Coverage:        | 22%         |
| Protein Localisation: | 250 ... 270 |

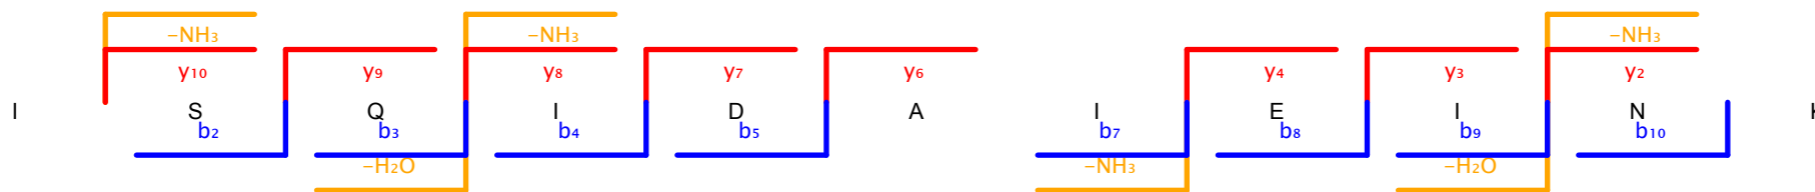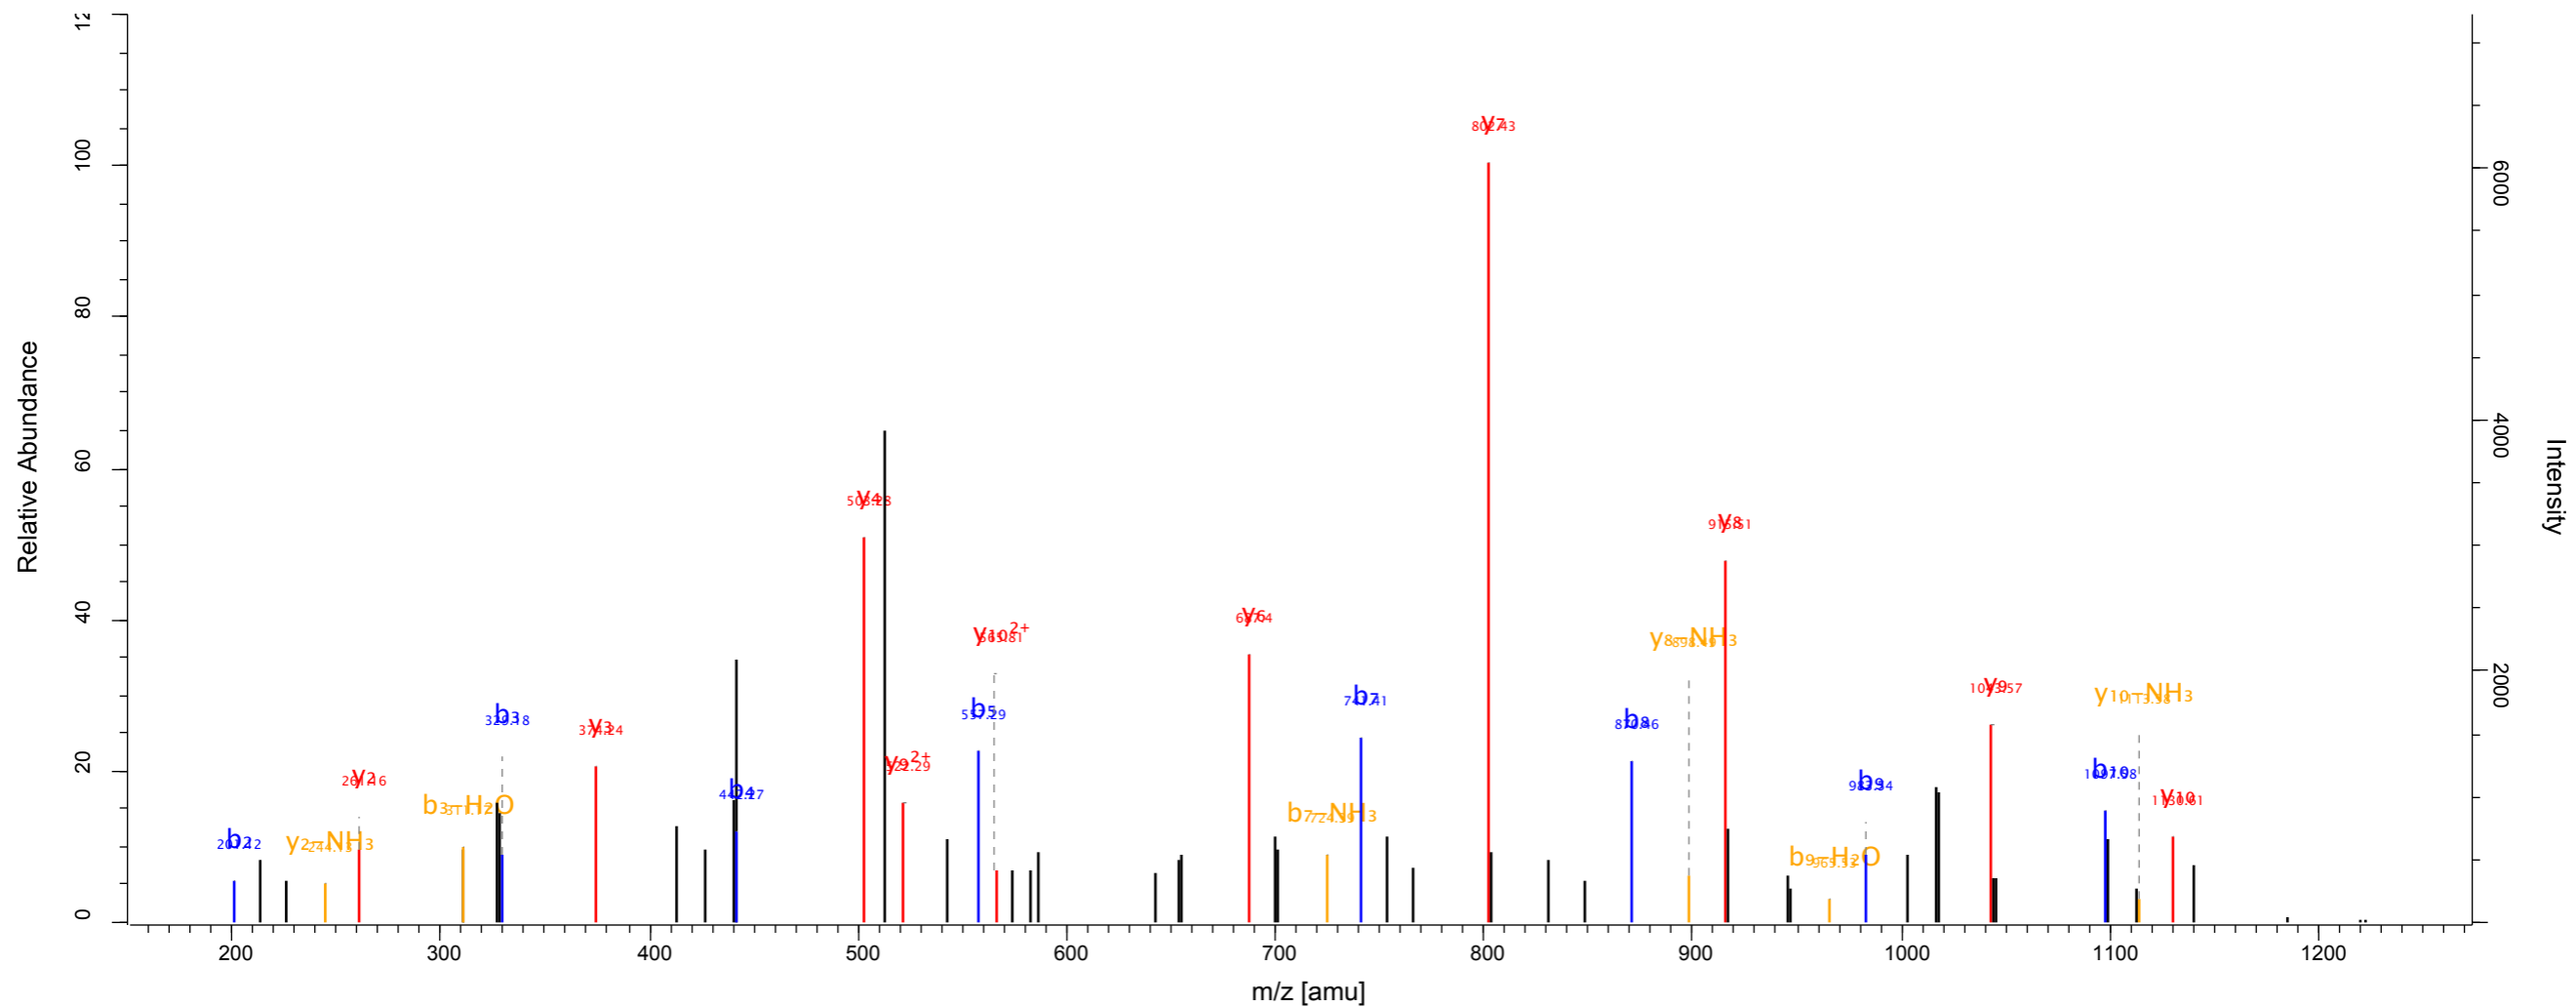

precursor information

|                   |                  |
|-------------------|------------------|
| Mass:             | 1242.68141       |
| m/z:              | 622.34708        |
| Charge:           | 2+               |
| Retention time:   | 61.0027078515625 |
| Score:            | 151.7877         |
| Mass Error (ppm): | -0.44902         |
| PEP:              | 1.6703E-06       |
| Precursor Type:   | MULTI            |

general information

|                       |           |
|-----------------------|-----------|
| Annotation:           | 9 of 11   |
| AminoAcids Coverage:  | 82 %      |
| Intensity Coverage:   | 54 %      |
| Peak Coverage:        | 30 %      |
| Protein Localisation: | 17 ... 27 |

| b ion      |                |    |     |    | y ion          |            | y <sup>2+</sup> ion |            |
|------------|----------------|----|-----|----|----------------|------------|---------------------|------------|
| Δ dalton   | mass           |    | seq |    | Δ dalton       | mass       | Δ dalton            | mass       |
|            | 114.091340447  | 1  | I   | 10 |                |            |                     |            |
| +0.0252365 | 201.123368857  | 2  | S   | 9  | 1130.605179396 | -0.0253454 | 565.806227931       | +0.124253  |
| +0.0511469 | 329.181946368  | 3  | Q   | 8  | 1043.573150986 | -0.1544498 | 522.290213726       | -0.1351234 |
| -0.0981026 | 442.266010349  | 4  | I   | 7  | 915.514573475  | -0.128404  | 915.514573475       |            |
| +0.0142366 | 557.292953381  | 5  | D   | 6  | 802.430509495  | -0.0298747 | 802.430509495       |            |
|            | 628.330067168  | 6  | A   | 5  | 687.403566463  | -0.0009175 | 687.403566463       |            |
| +0.0535813 | 741.414131149  | 7  | I   | 4  | 616.366452675  |            | 616.366452675       |            |
| -0.0177594 | 870.456724245  | 8  | E   | 3  | 503.282388694  | +0.0354214 | 503.282388694       |            |
| -0.3423019 | 983.540788226  | 9  | I   | 2  | 374.239795598  | -0.0082282 | 374.239795598       |            |
| -0.1882079 | 1097.583715673 | 10 | N   | 1  | 261.155731618  | +0.0747676 | 261.155731618       |            |
|            |                | 11 | K   | 0  | 147.112804171  |            | 147.112804171       |            |

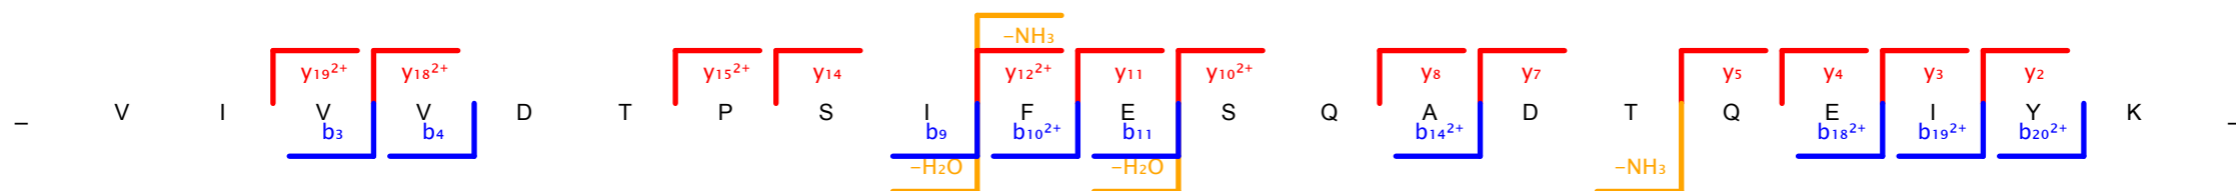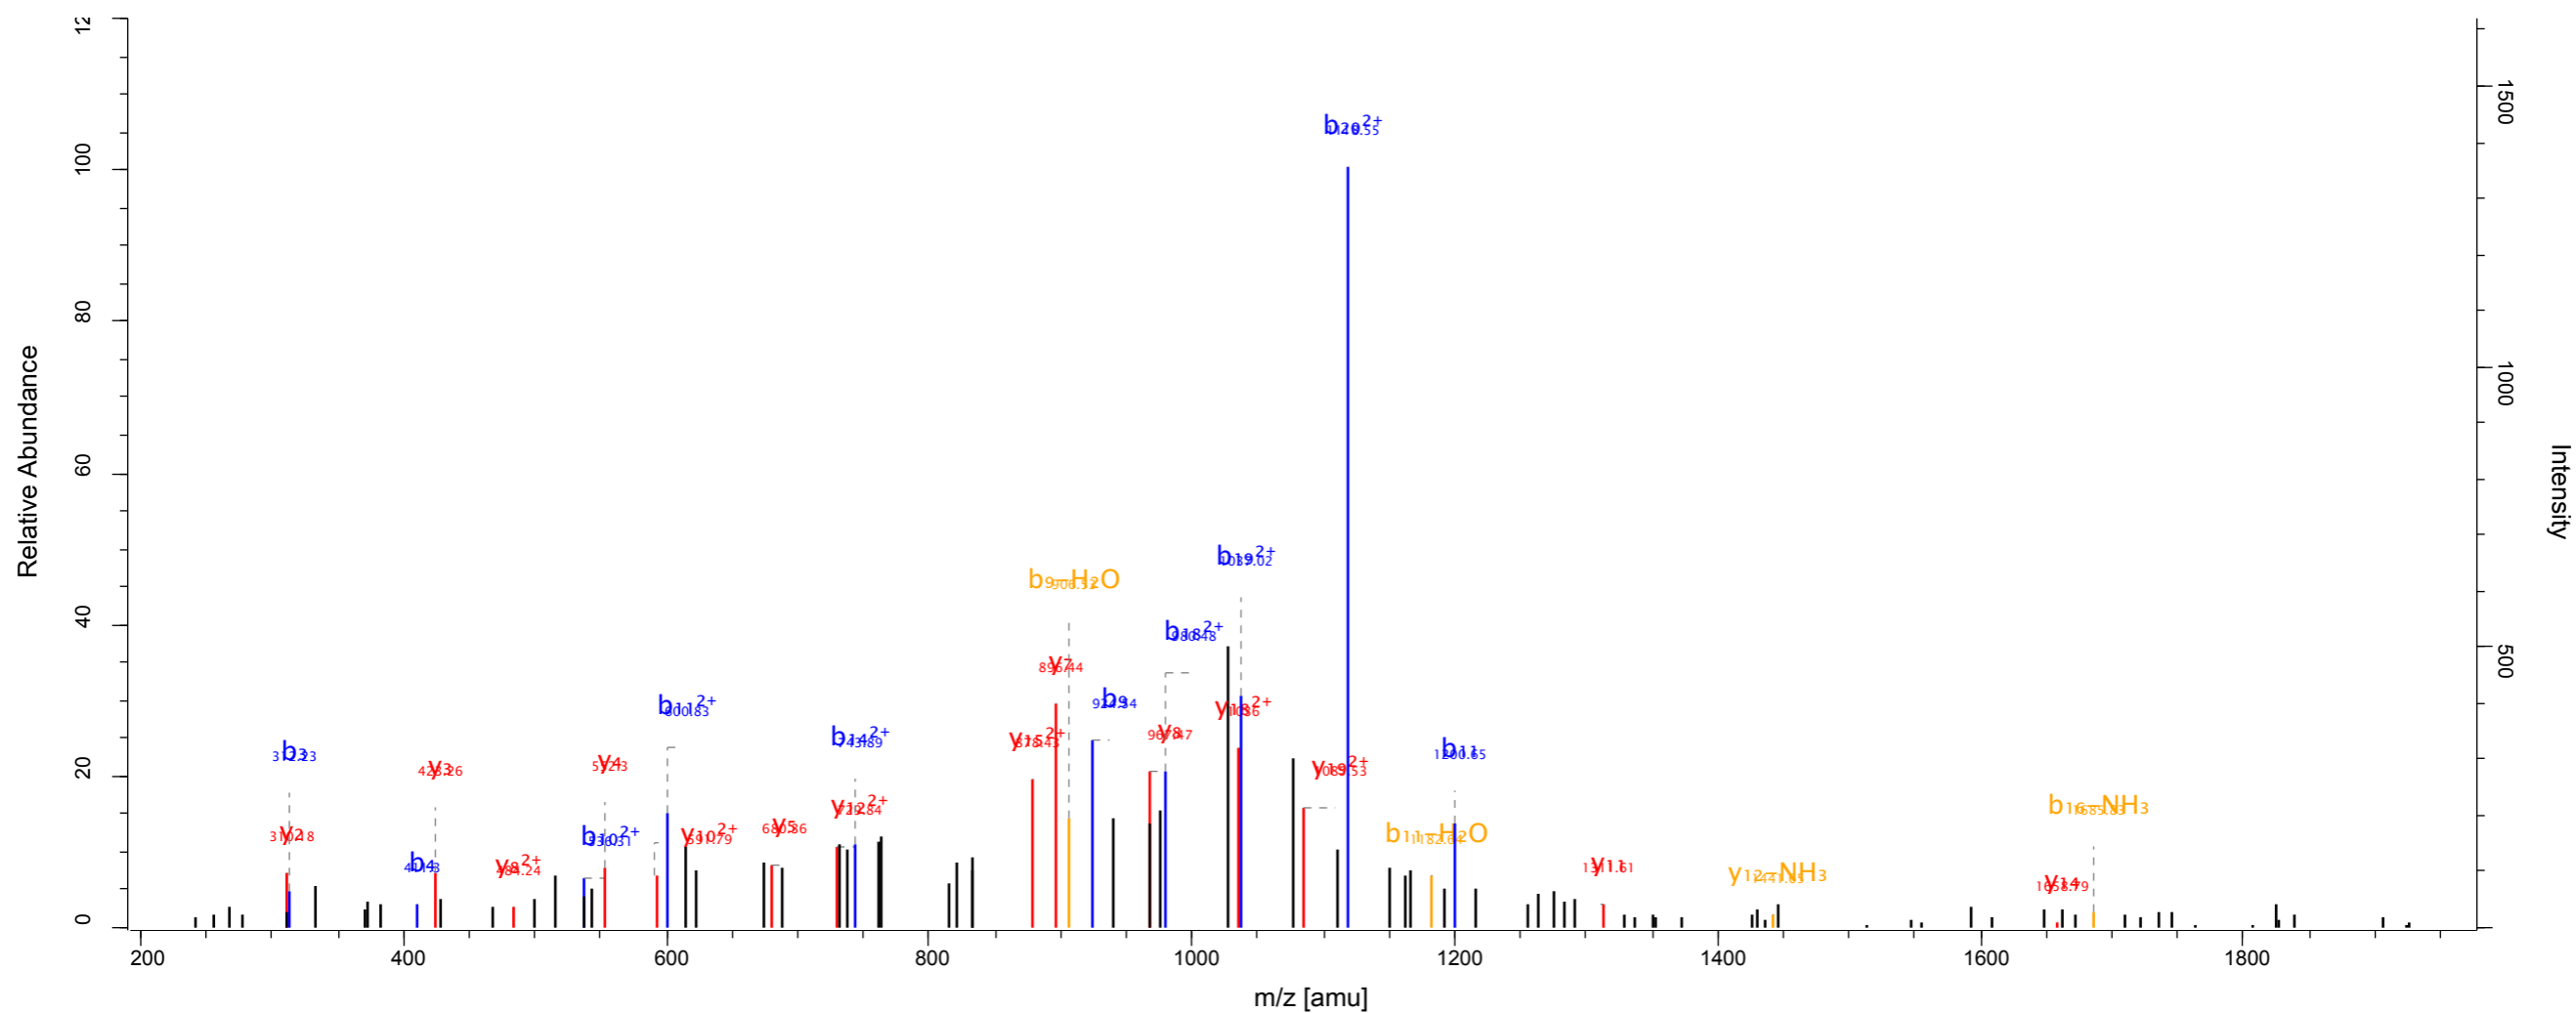

precursor information

|                   |                  |
|-------------------|------------------|
| Mass:             | 2281.19924       |
| m/z:              | 704.74026        |
| Charge:           | 2                |
| RetentionTime:    | 06.1001434326172 |
| Score:            | 120.0065         |
| Mass Error (ppm): | -0.41188         |
| DEP:              | 2.66745_10       |
| Precursor Type:   | ISO              |

| b <sup>2+</sup> ion |              | b ion      |              |    |     |    | y ion        |            | y <sup>2+</sup> ion |            |
|---------------------|--------------|------------|--------------|----|-----|----|--------------|------------|---------------------|------------|
| Δ dalton            | mass         | Δ dalton   | mass         |    | seq |    | Δ dalton     | mass       | Δ dalton            | mass       |
|                     | 100.07569038 |            | 100.07569038 | 1  | V   | 20 |              |            |                     |            |
|                     | 213.15975436 |            | 213.15975436 | 2  | I   | 19 | 2283.1390851 |            | 2283.1390851        |            |
|                     | 312.22816828 | -0.0363348 | 312.22816828 | 3  | V   | 18 | 2170.0550211 |            | 1085.5311488        | -0.2334193 |
|                     | 411.2965822  | -0.0415773 | 411.2965822  | 4  | V   | 17 | 2070.9866072 |            | 1035.9969418        | +0.1143863 |
|                     | 526.32352523 |            | 526.32352523 | 5  | D   | 16 | 1971.9181933 |            | 1971.9181933        |            |
|                     | 627.3712037  |            | 627.3712037  | 6  | T   | 15 | 1856.8912502 |            | 1856.8912502        |            |
|                     | 724.42396755 |            | 724.42396755 | 7  | P   | 14 | 1755.8435718 |            | 878.4254242         | -0.1171355 |
|                     | 811.45599596 |            | 811.45599596 | 8  | S   | 13 | 1658.7908079 | -0.45072   | 1658.7908079        |            |
|                     | 924.54005994 | -0.0113124 | 924.54005994 | 9  | I   | 12 | 1571.7587795 |            | 1571.7587795        |            |
| +0.0123153          | 536.30787516 |            | 1071.6084739 | 10 | F   | 11 | 1458.6747155 |            | 729.840996          | +0.2907789 |
| +0.0419831          | 600.82917171 | -0.0905201 | 1200.651067  | 11 | E   | 10 | 1311.6063016 | +0.4922091 | 1311.6063016        |            |
|                     | 1287.6830954 |            | 1287.6830954 | 12 | S   | 9  | 1182.5637085 |            | 591.78549249        | +0.1523737 |
|                     | 1415.7416729 |            | 1415.7416729 | 13 | Q   | 8  | 1095.5316801 |            | 1095.5316801        |            |
| -0.0920062          | 743.89303157 |            | 1486.7787867 | 14 | A   | 7  | 967.47310259 | -0.1799507 | 484.24018953        | +0.238143  |
|                     | 1601.8057297 |            | 1601.8057297 | 15 | D   | 6  | 896.4359888  | -0.054458  | 896.4359888         |            |
|                     | 1702.8534082 |            | 1702.8534082 | 16 | T   | 5  | 781.40904577 |            | 781.40904577        |            |
|                     | 1830.9119857 |            | 1830.9119857 | 17 | Q   | 4  | 680.3613673  | -0.0449    | 680.3613673         |            |
| -0.0818187          | 980.48092762 |            | 1959.9545788 | 18 | E   | 3  | 552.30278979 | -0.0075017 | 552.30278979        |            |
| +0.0825091          | 1037.0229596 |            | 2073.0386428 | 19 | I   | 2  | 423.26019669 | -0.0083046 | 423.26019669        |            |
| +0.0073878          | 1118.5546239 |            | 2236.1019713 | 20 | Y   | 1  | 310.17613271 | -0.0543676 | 310.17613271        |            |
|                     |              |            |              | 21 | K   | 0  | 147.11280417 |            | 147.11280417        |            |

general information

|                       |             |
|-----------------------|-------------|
| Annotation:           | 15 of 21    |
| AminoAcids Coverage:  | 71 %        |
| Intensity Coverage:   | 53 %        |
| Peak Coverage:        | 28 %        |
| Protein Localisation: | 118 ... 138 |



Scan number 3357 Raw file 20091021\_Orbi6\_MaHe\_SA\_ADH\_exp3\_30h\_Gel06  
 Method ITMS; CID Genenames C1orf174

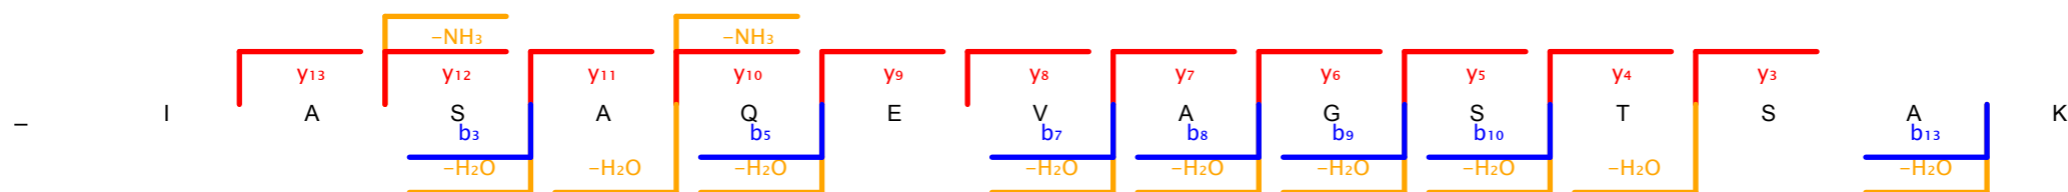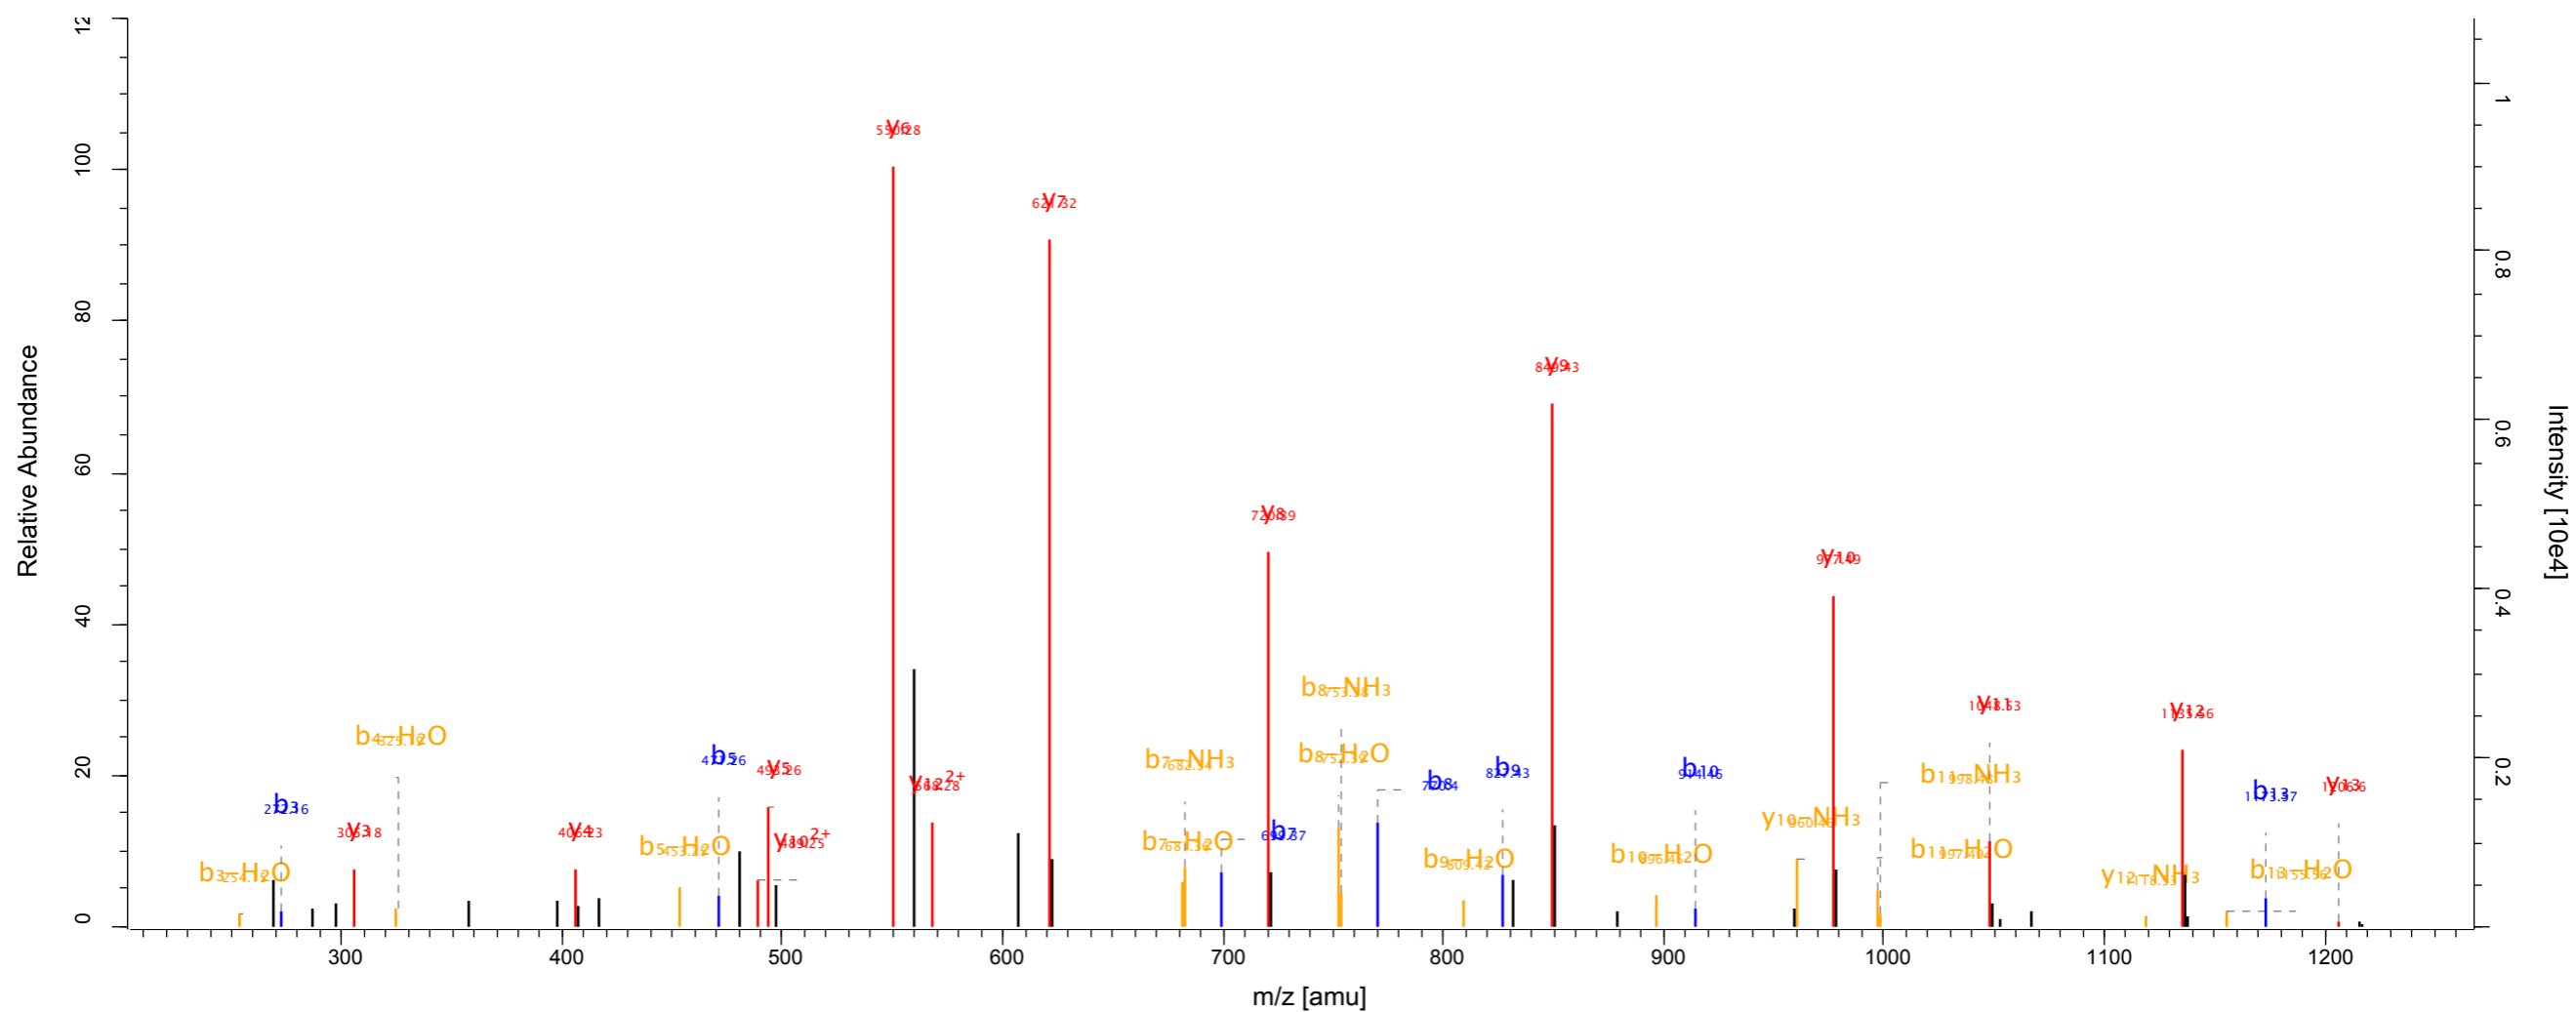

precursor information

|                   |                  |
|-------------------|------------------|
| Mass:             | 1218.67205       |
| m/z:              | 660.2428         |
| Charge:           | 2+               |
| Potentialtime:    | 27.7201567220225 |
| Score:            | 100.7002         |
| Mass Error [ppm]: | 0.14820          |
| PEP:              | 1.2802516        |
| Precursor Type:   | ISO              |

| b ion      |                |     |   |    | y ion          |            | y <sup>2+</sup> ion |            |
|------------|----------------|-----|---|----|----------------|------------|---------------------|------------|
| Δ dalton   | mass           | seq |   |    | Δ dalton       | mass       | Δ dalton            | mass       |
|            | 114.091340447  | 1   | I | 13 |                |            |                     |            |
|            | 185.128454235  | 2   | A | 12 | 1206.596071273 | +0.1243877 | 1206.596071273      |            |
| -0.0183012 | 272.160482645  | 3   | S | 11 | 1135.558957485 | -0.0825171 | 568.283116976       | -0.0981805 |
|            | 343.197596432  | 4   | A | 10 | 1048.526929075 | -0.0802738 | 1048.526929075      |            |
| -0.1043795 | 471.256173944  | 5   | Q | 9  | 977.489815287  | -0.0684286 | 489.248545877       | +0.058522  |
|            | 600.29876704   | 6   | E | 8  | 849.431237776  | -0.0307251 | 849.431237776       |            |
| -0.0099422 | 699.367180956  | 7   | V | 7  | 720.38864468   | -0.036716  | 720.38864468        |            |
| -0.0663431 | 770.404294744  | 8   | A | 6  | 621.320230764  | -0.0044349 | 621.320230764       |            |
| -0.0531388 | 827.425758468  | 9   | G | 5  | 550.283116976  | -0.0135857 | 550.283116976       |            |
| +0.0331799 | 914.457786878  | 10  | S | 4  | 493.261653252  | -0.0019487 | 493.261653252       |            |
|            | 1015.505465352 | 11  | T | 3  | 406.229624842  | +0.0448503 | 406.229624842       |            |
|            | 1102.537493762 | 12  | S | 2  | 305.181946368  | +0.0314936 | 305.181946368       |            |
| -0.0914533 | 1173.574607549 | 13  | A | 1  | 218.149917958  |            | 218.149917958       |            |
|            |                | 14  | K | 0  | 147.112804171  |            | 147.112804171       |            |

general information

|                       |           |
|-----------------------|-----------|
| Annotation:           | 12 of 14  |
| AminoAcids Coverage:  | 86 %      |
| Intensity Coverage:   | 78 %      |
| Peak Coverage:        | 58 %      |
| Protein Localisation: | 26 ... 39 |

Scan number 16900 Raw file 20091021\_Orbi6\_MaHe\_SA\_ADH\_exp3\_30h\_Gel08  
 Method ITMS; CID Genenames GPR180

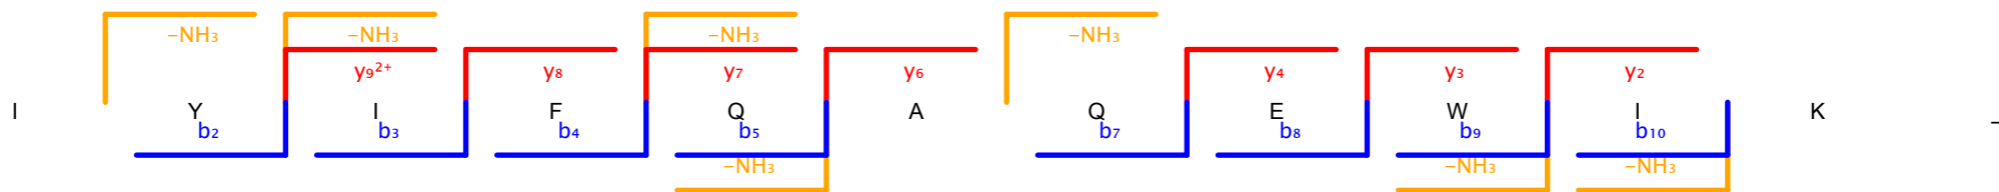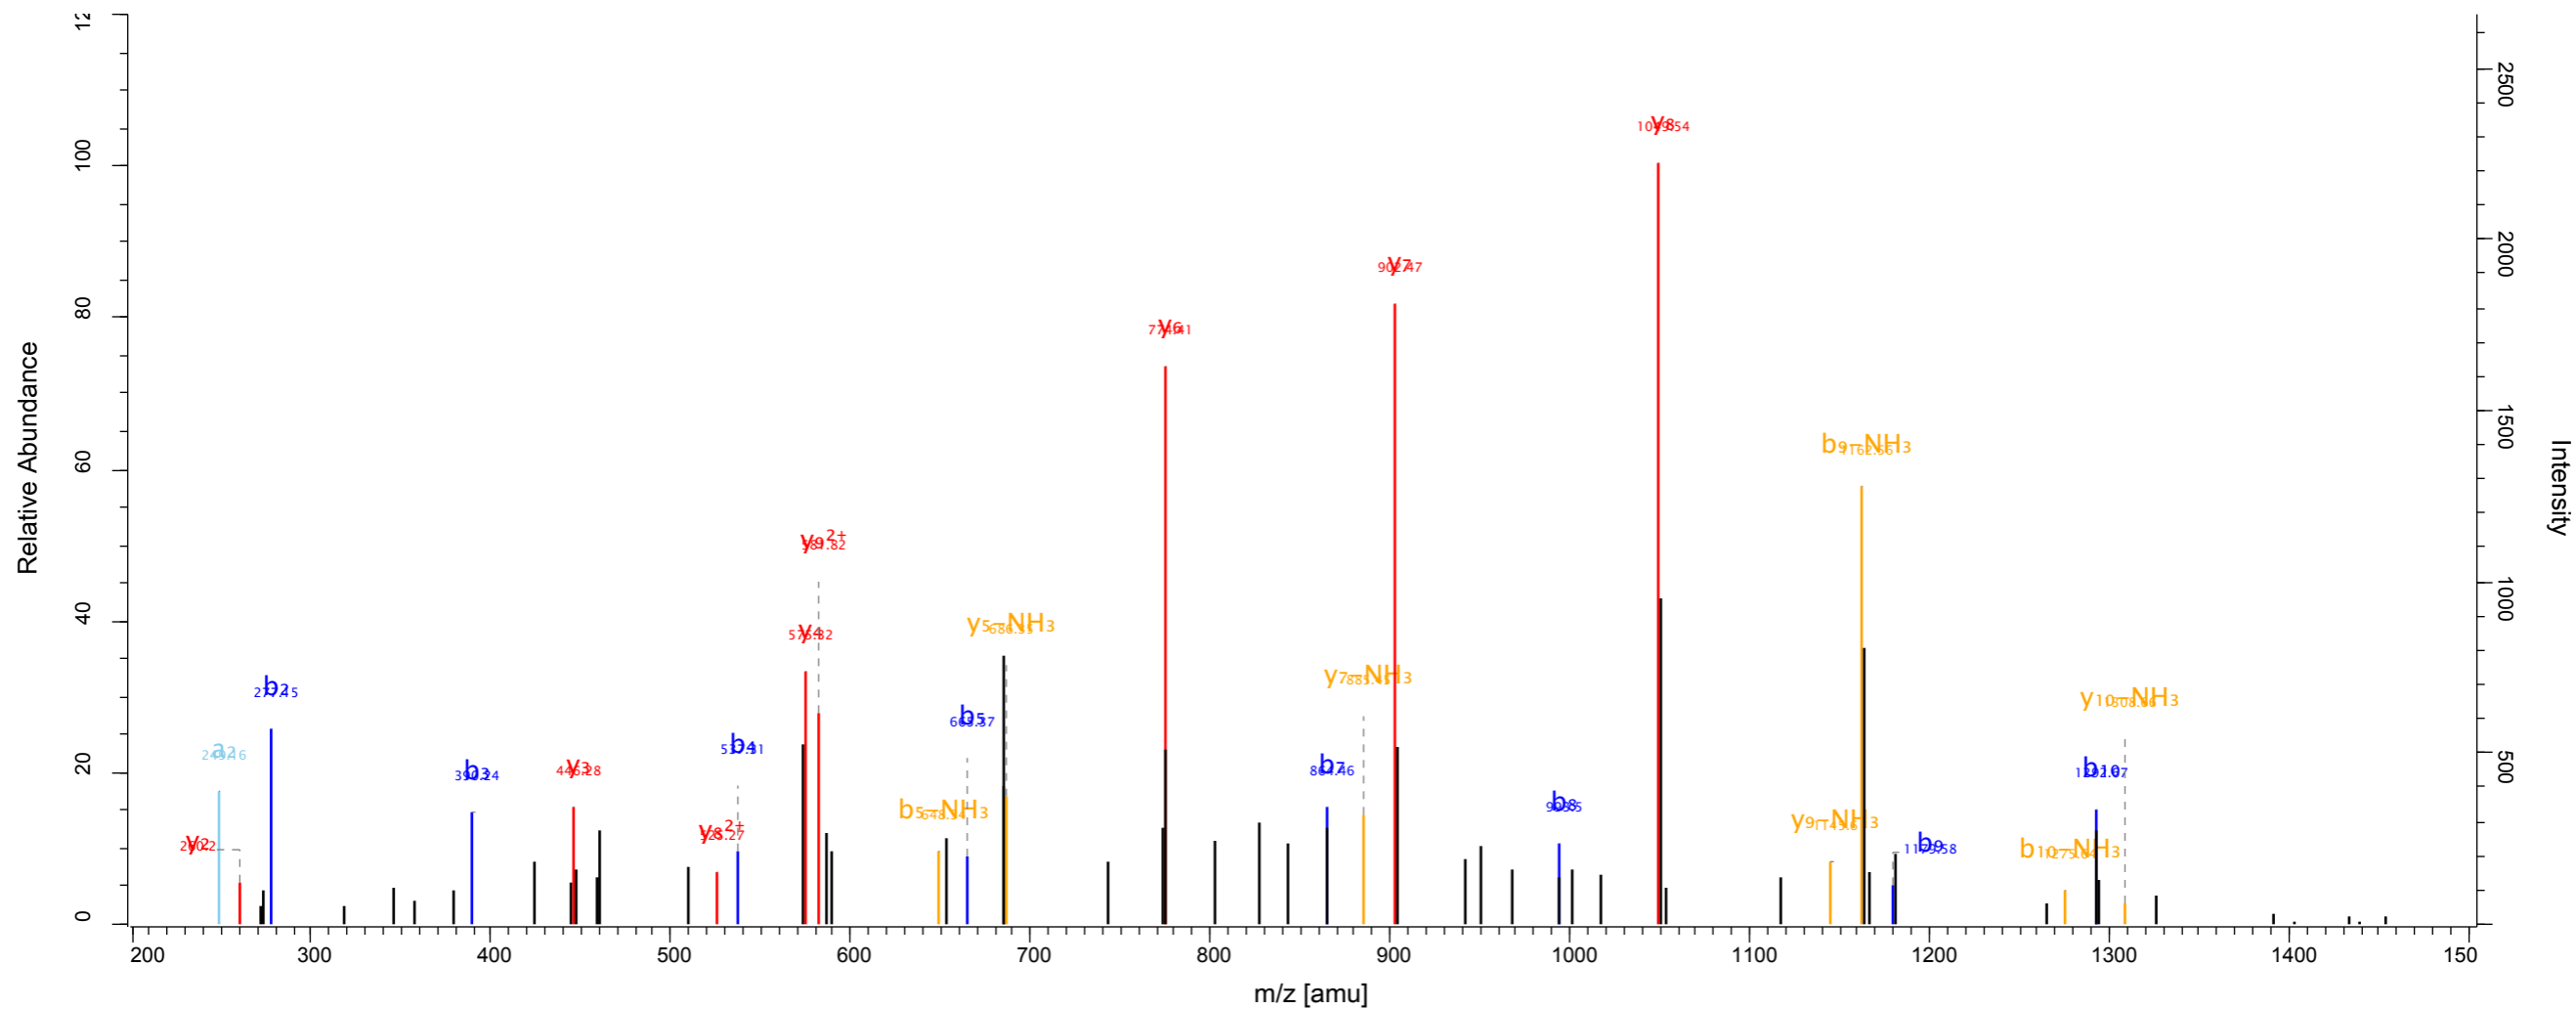

precursor information

|                   |                  |
|-------------------|------------------|
| Mass:             | 1427.76501       |
| m/z:              | 710.88078        |
| Charge:           | 2+               |
| Retention time:   | 100.897171020508 |
| Score:            | 148.557          |
| Mass Error (ppm): | -0.4361          |
| PEP:              | 2.110E-06        |
| Precursor Type:   | MULTI            |

general information

|                       |           |
|-----------------------|-----------|
| Annotation:           | 9 of 11   |
| AminoAcids Coverage:  | 82 %      |
| Intensity Coverage:   | 55 %      |
| Peak Coverage:        | 34 %      |
| Protein Localisation: | 71 ... 81 |

| a ion      |              | b ion      |              |    |     |    | y ion        |            | y <sup>2+</sup> ion |            |
|------------|--------------|------------|--------------|----|-----|----|--------------|------------|---------------------|------------|
| Δ dalton   | mass         | Δ dalton   | mass         |    | seq |    | Δ dalton     | mass       | Δ dalton            | mass       |
|            | 86.096425825 |            | 114.09134045 | 1  | I   | 10 |              |            |                     |            |
| +0.0638479 | 249.15975436 | -0.0648863 | 277.15466899 | 2  | Y   | 9  | 1325.6888494 |            | 1325.6888494        |            |
|            | 362.24381834 | -0.4507691 | 390.23873297 | 3  | I   | 8  | 1162.6255209 |            | 581.81639869        | +0.1276931 |
|            | 509.31223226 | -0.2381161 | 537.30714688 | 4  | F   | 7  | 1049.5414569 | -0.1149433 | 525.2743667         | +0.1150376 |
|            | 637.37080977 | -0.0037249 | 665.36572439 | 5  | Q   | 6  | 902.47304301 | -0.0897422 | 902.47304301        |            |
|            | 708.40792356 |            | 736.40283818 | 6  | A   | 5  | 774.4144655  | +0.0602049 | 774.4144655         |            |
|            | 836.46650107 | -0.1267599 | 864.46141569 | 7  | Q   | 4  | 703.37735171 |            | 703.37735171        |            |
|            | 965.50909417 | -0.1078296 | 993.50400879 | 8  | E   | 3  | 575.3187742  | -0.0364866 | 575.3187742         |            |
|            | 1151.5884071 | -0.2293178 | 1179.5833217 | 9  | W   | 2  | 446.2761811  | +0.053775  | 446.2761811         |            |
|            | 1264.6724711 | -0.2095    | 1292.6673857 | 10 | I   | 1  | 260.19686815 | -0.0087578 | 260.19686815        |            |
|            |              |            |              | 11 | K   | 0  | 147.11280417 |            | 147.11280417        |            |

Scan number 18379 Raw file 20091021\_Orbi6\_MaHe\_SA\_ADH\_exp3\_30h\_Gel08  
 Method ITMS; CID Genenames CD82

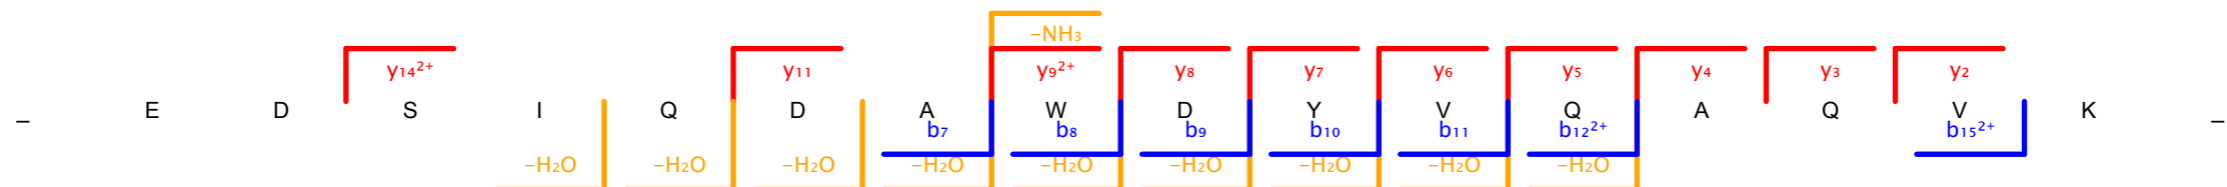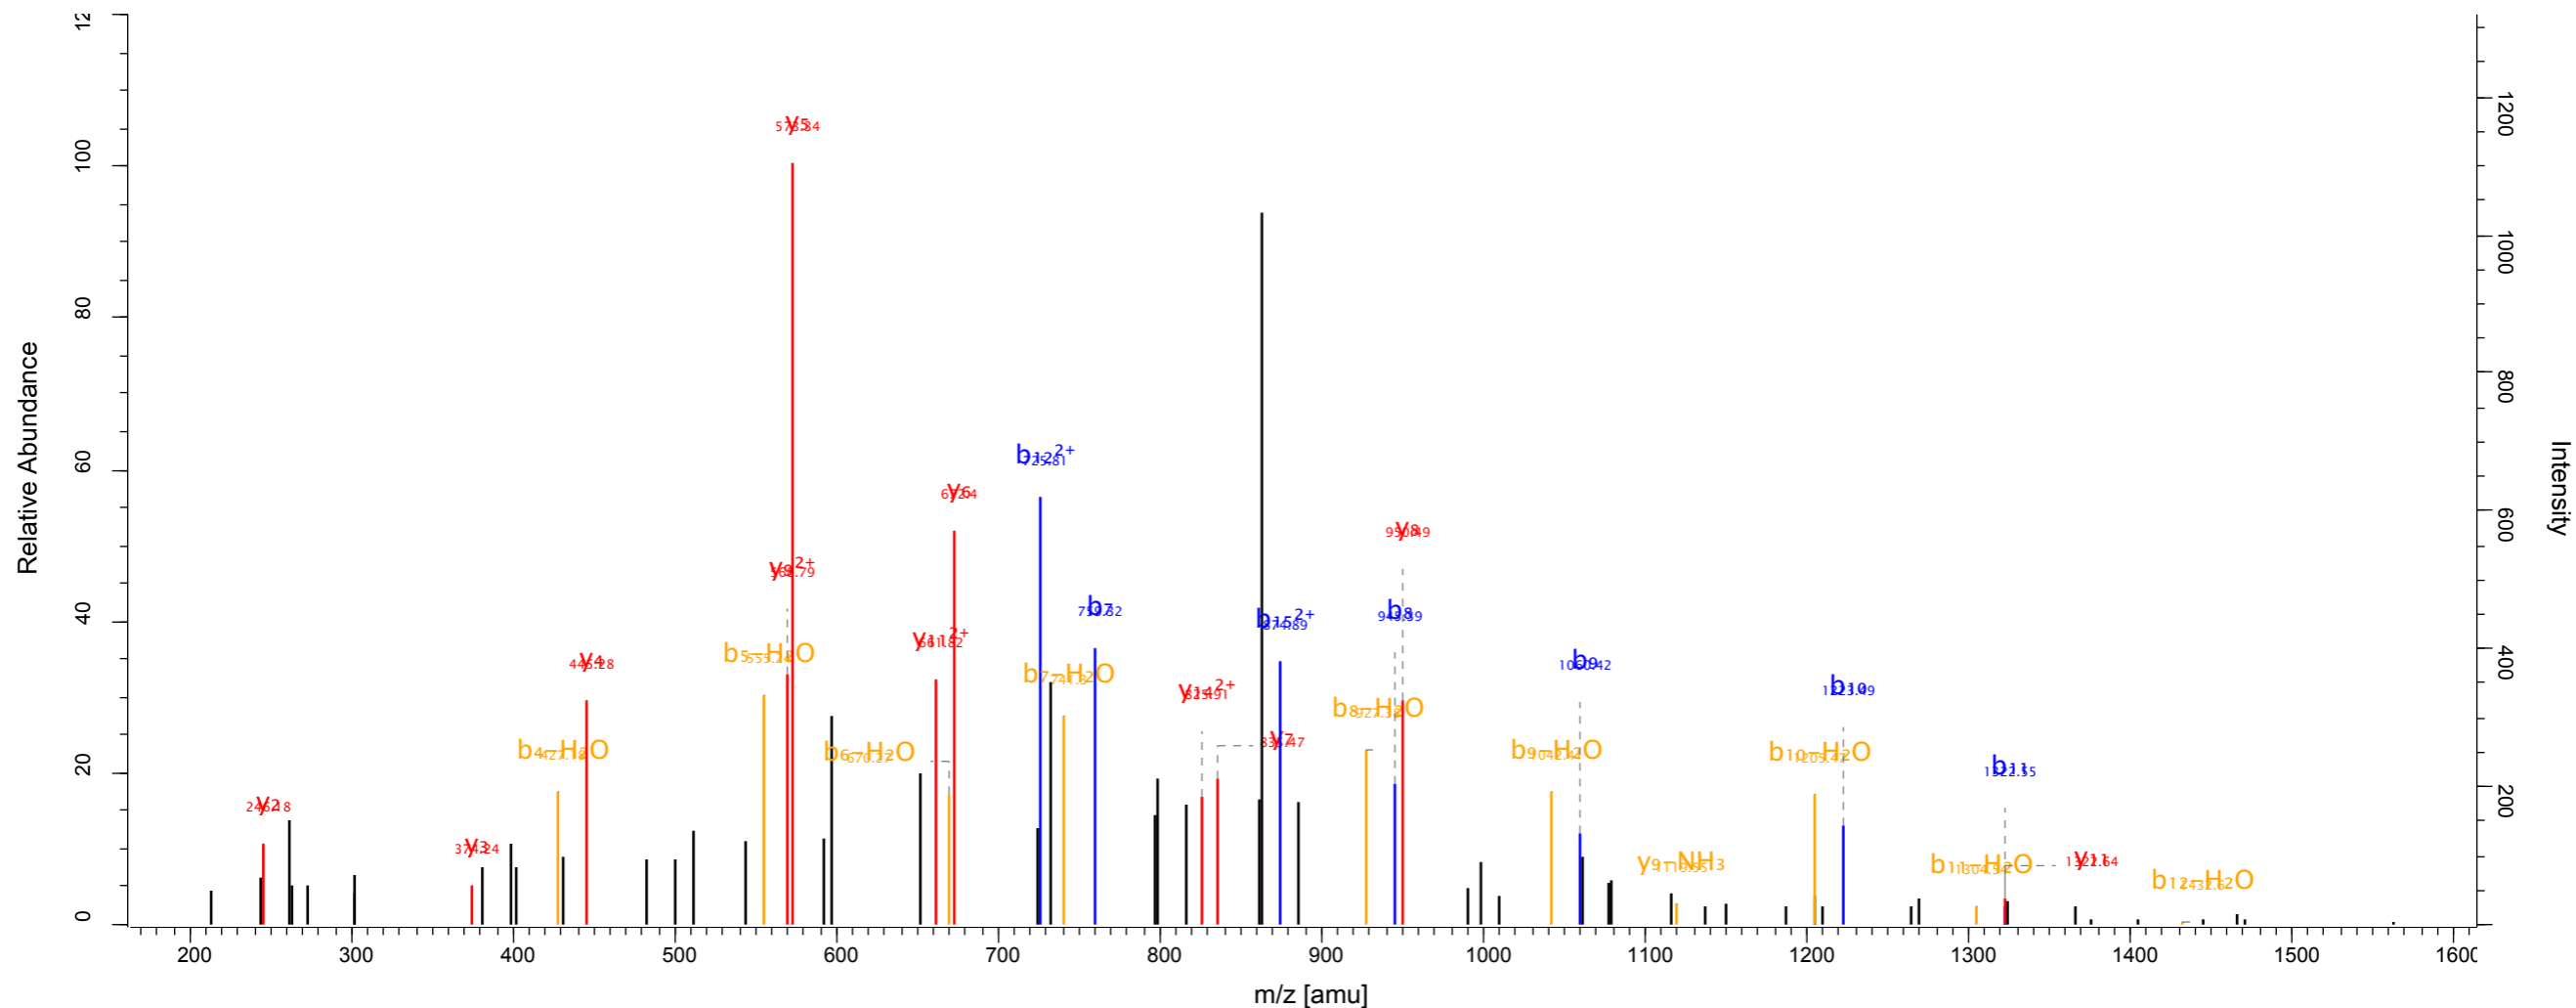

precursor information

|                   |                  |
|-------------------|------------------|
| Mass:             | 1802.87206       |
| m/z:              | 622.2082         |
| Charge:           | 2+               |
| Retention time:   | 100.606224828867 |
| Score:            | 145.0082         |
| Mass Error [ppm]: | 0.7477           |
| DEP:              | 2.1028E-05       |
| Precursor Type:   | ISO              |

general information

|                       |             |
|-----------------------|-------------|
| Annotation:           | 13 of 16    |
| AminoAcids Coverage:  | 81 %        |
| Intensity Coverage:   | 58 %        |
| Peak Coverage:        | 27 %        |
| Protein Localisation: | 133 ... 148 |

| b <sup>2+</sup> ion |              | b ion      |              |     | y ion |          | y <sup>2+</sup> ion |            |              |
|---------------------|--------------|------------|--------------|-----|-------|----------|---------------------|------------|--------------|
| Δ dalton            | mass         | Δ dalton   | mass         | seq |       | Δ dalton | mass                | Δ dalton   | mass         |
|                     | 130.04986956 |            | 130.04986956 | 1   | E     | 15       |                     |            |              |
|                     | 245.07681259 |            | 245.07681259 | 2   | D     | 14       | 1765.8391551        |            | 1765.8391551 |
|                     | 332.108841   |            | 332.108841   | 3   | S     | 13       | 1650.8122121        |            | 825.90974426 |
|                     | 445.19290499 |            | 445.19290499 | 4   | I     | 12       | 1563.7801836        |            | 1563.7801836 |
|                     | 573.2514825  |            | 573.2514825  | 5   | Q     | 11       | 1450.6961197        |            | 1450.6961197 |
|                     | 688.27842553 |            | 688.27842553 | 6   | D     | 10       | 1322.6375422        | +0.2623602 | 661.82240931 |
|                     | 759.31553932 | -0.1519651 | 759.31553932 | 7   | A     | 9        | 1207.6105991        |            | 1207.6105991 |
|                     | 945.39485227 | -0.2318274 | 945.39485227 | 8   | W     | 8        | 1136.5734853        |            | 568.7903809  |
|                     | 1060.4217953 | -0.3441586 | 1060.4217953 | 9   | D     | 7        | 950.49417238        | -0.1055615 | 950.49417238 |
|                     | 1223.4851238 | -0.0174725 | 1223.4851238 | 10  | Y     | 6        | 835.46722935        | -0.180242  | 835.46722935 |
|                     | 1322.5535378 | -0.3150124 | 1322.5535378 | 11  | V     | 5        | 672.40390081        | -0.07779   | 672.40390081 |
| +0.0141567          | 725.80969587 |            | 1450.6121153 | 12  | Q     | 4        | 573.3354869         | +0.0002675 | 573.3354869  |
|                     | 1521.6492291 |            | 1521.6492291 | 13  | A     | 3        | 445.27690939        | +0.0045237 | 445.27690939 |
|                     | 1649.7078066 |            | 1649.7078066 | 14  | Q     | 2        | 374.2397956         | +0.054699  | 374.2397956  |
| +0.0530757          | 874.89174847 |            | 1748.7762205 | 15  | V     | 1        | 246.18121809        | +0.0049697 | 246.18121809 |
|                     |              |            |              | 16  | K     | 0        | 147.11280417        |            | 147.11280417 |

Scan number 18869 Raw file 20091021\_Orbi6\_MaHe\_SA\_ADH\_exp3\_30h\_Gel09  
 Method ITMS; CID Genenames TFDP3

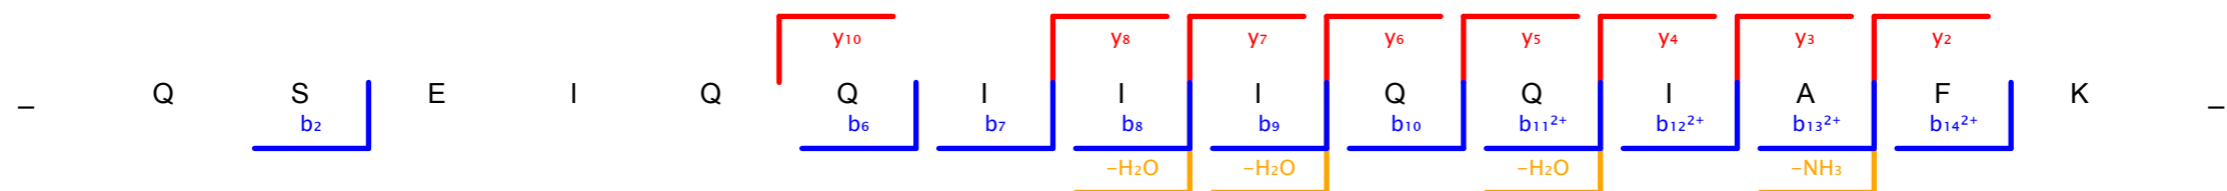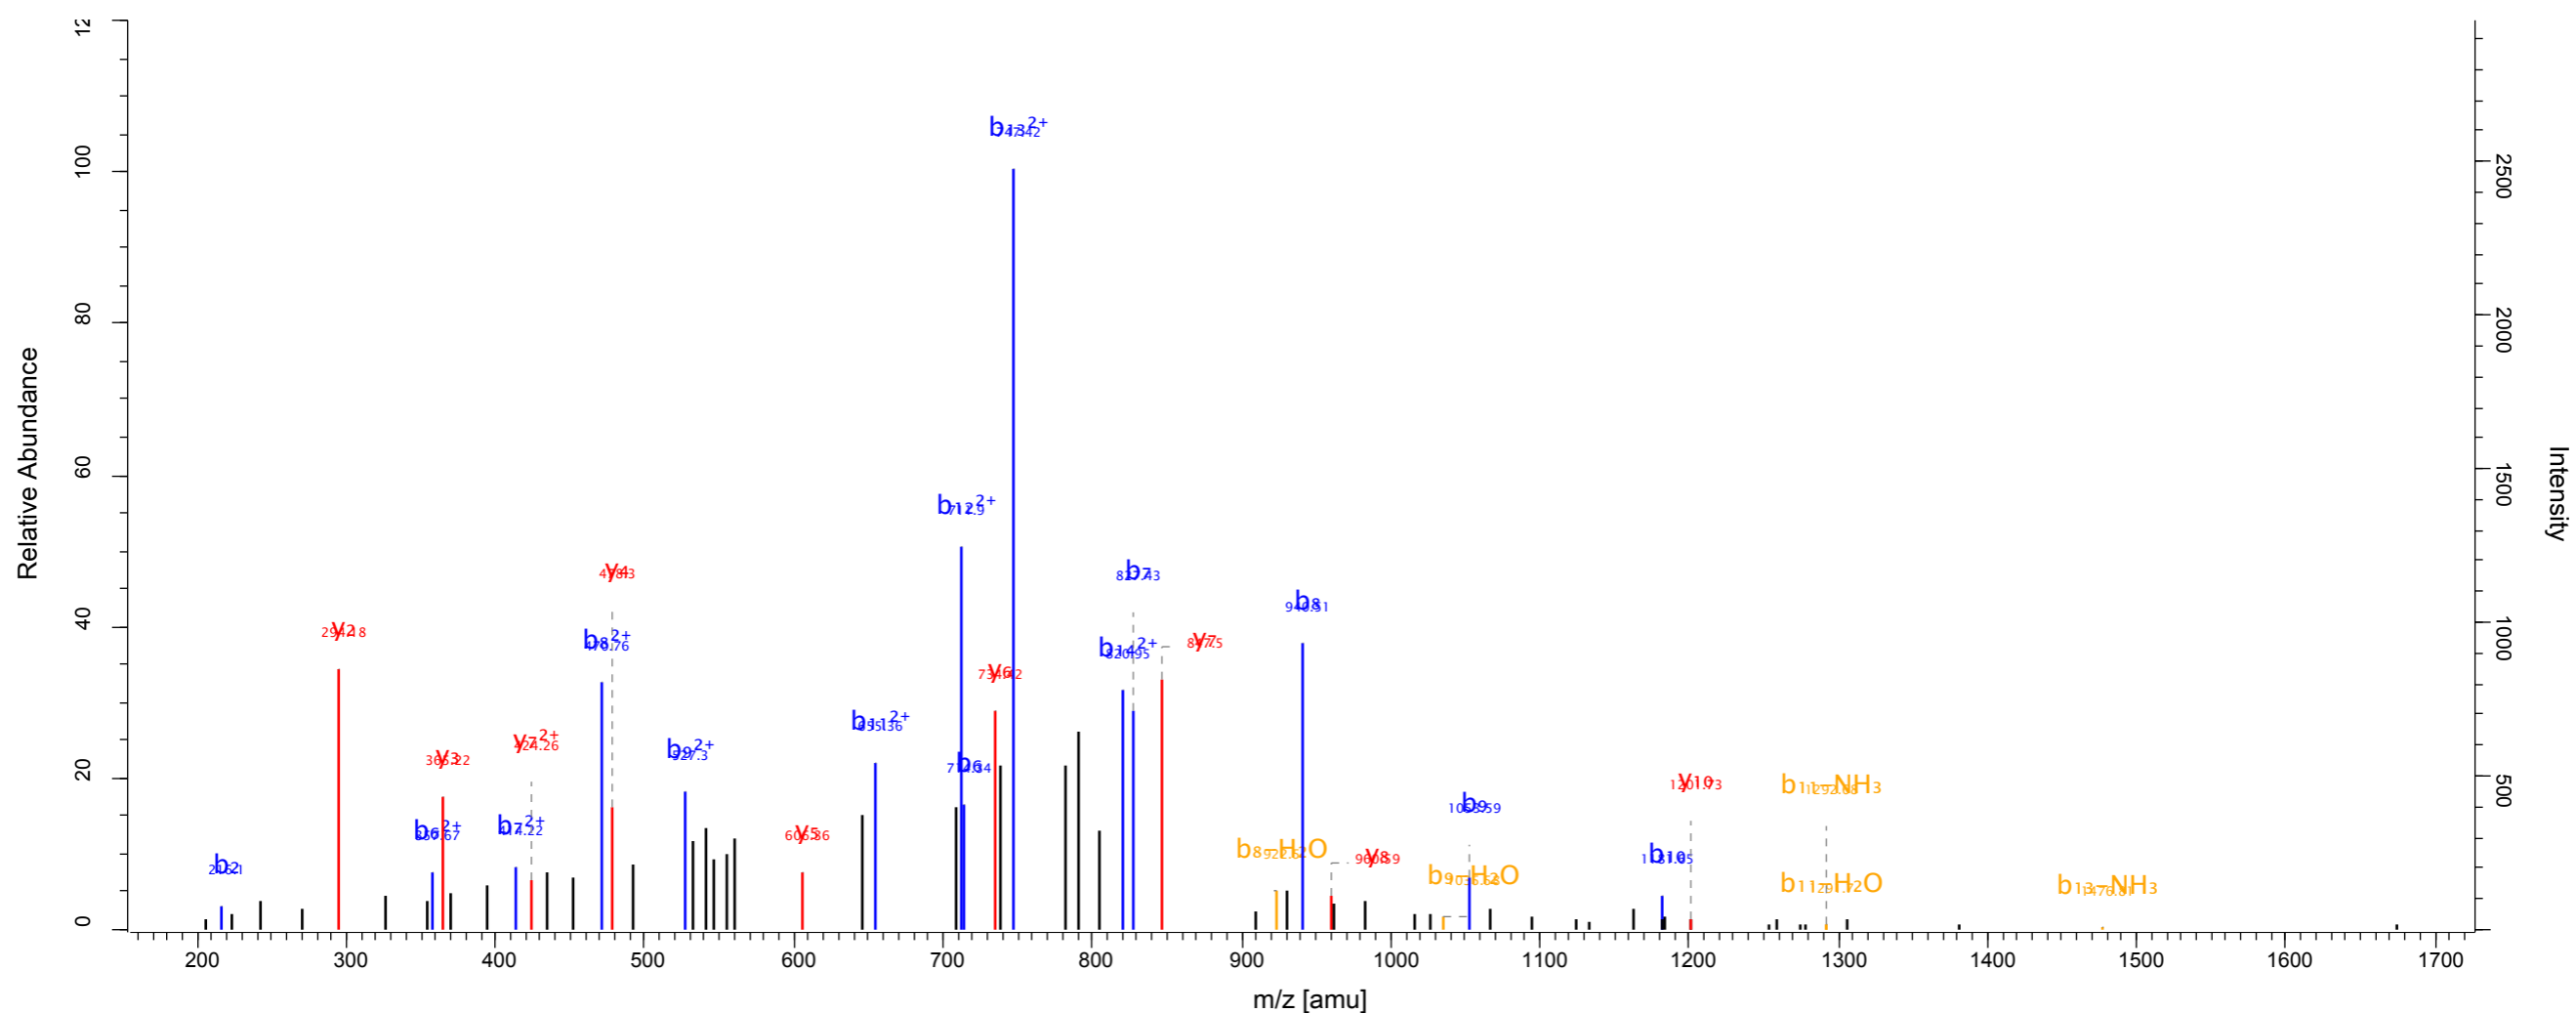

precursor information

|                   |                  |
|-------------------|------------------|
| Mass:             | 1785.00007       |
| m/z:              | 506.2402         |
| Charge:           | 2+               |
| Potentia time:    | 108.080514526367 |
| Score:            | 152.8087         |
| Mass Error [ppm]: | 0.10242          |
| DEP:              | 2.52555_06       |
| Precursor Type:   | ISO              |

| b <sup>2+</sup> ion |              | b ion      |              |    |     |    | y ion        |            | y <sup>2+</sup> ion |          |
|---------------------|--------------|------------|--------------|----|-----|----|--------------|------------|---------------------|----------|
| Δ dalton            | mass         | Δ dalton   | mass         |    | seq |    | Δ dalton     | mass       | Δ dalton            | mass     |
|                     | 129.06585398 |            | 129.06585398 | 1  | Q   | 14 |              |            |                     |          |
|                     | 216.09788239 | +0.0214871 | 216.09788239 | 2  | S   | 13 | 1658.9475833 |            | 1658.9475833        |          |
|                     | 345.14047548 |            | 345.14047548 | 3  | E   | 12 | 1571.9155549 |            | 1571.9155549        |          |
|                     | 458.22453946 |            | 458.22453946 | 4  | I   | 11 | 1442.8729618 |            | 1442.8729618        |          |
|                     | 586.28311698 |            | 586.28311698 | 5  | Q   | 10 | 1329.7888978 |            | 1329.7888978        |          |
| -0.1481793          | 357.67448548 | +0.0674242 | 714.34169449 | 6  | Q   | 9  | 1201.7303203 | +0.028957  | 1201.7303203        |          |
| -0.0578261          | 414.21651747 | -0.1411515 | 827.42575847 | 7  | I   | 8  | 1073.6717428 |            | 1073.6717428        |          |
| +0.0126908          | 470.75854946 | -0.1075397 | 940.50982245 | 8  | I   | 7  | 960.58767884 | +0.0008832 | 960.58767884        |          |
| -0.1284013          | 527.30058145 | -0.067031  | 1053.5938864 | 9  | I   | 6  | 847.50361486 | -0.0318741 | 424.25544566        | +0.16057 |
|                     | 1181.6524639 | -0.1470928 | 1181.6524639 | 10 | Q   | 5  | 734.41955088 | -0.136836  | 734.41955088        |          |
| +0.0356775          | 655.35915896 |            | 1309.7110415 | 11 | Q   | 4  | 606.36097337 | -0.0509758 | 606.36097337        |          |
| -0.0825874          | 711.90119095 |            | 1422.7951054 | 12 | I   | 3  | 478.30239586 | +0.0859098 | 478.30239586        |          |
| -0.0544524          | 747.41974784 |            | 1493.8322192 | 13 | A   | 2  | 365.21833187 | -0.0172821 | 365.21833187        |          |
| -0.1910764          | 820.9539548  |            | 1640.9006331 | 14 | F   | 1  | 294.18121809 | -0.0671434 | 294.18121809        |          |
|                     |              |            |              | 15 | K   | 0  | 147.11280417 |            | 147.11280417        |          |

general information

|                       |             |
|-----------------------|-------------|
| Annotation:           | 10 of 15    |
| AminoAcids Coverage:  | 67%         |
| Intensity Coverage:   | 67%         |
| Peak Coverage:        | 20%         |
| Protein Localisation: | 215 ... 229 |

Scan number 15736 Raw file 20091021\_Orbi6\_MaHe\_SA\_ADH\_exp3\_30h\_Gel10\_091024034333  
 Method ITMS; CID Genenames TMCC3

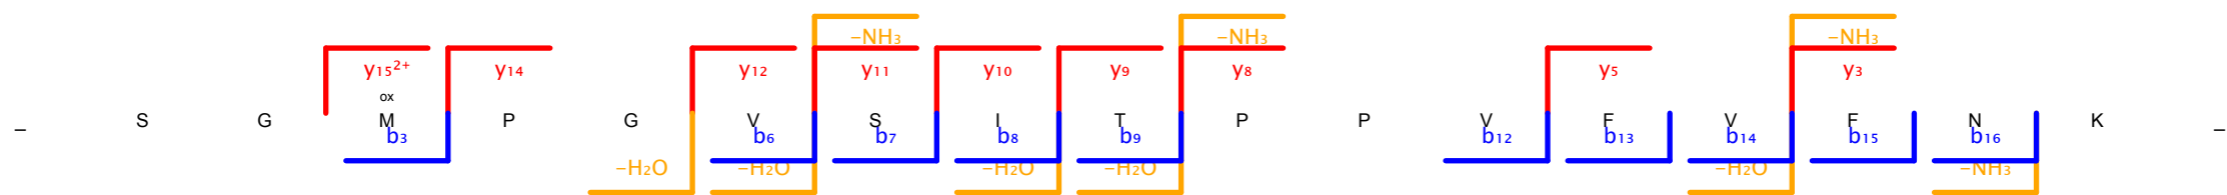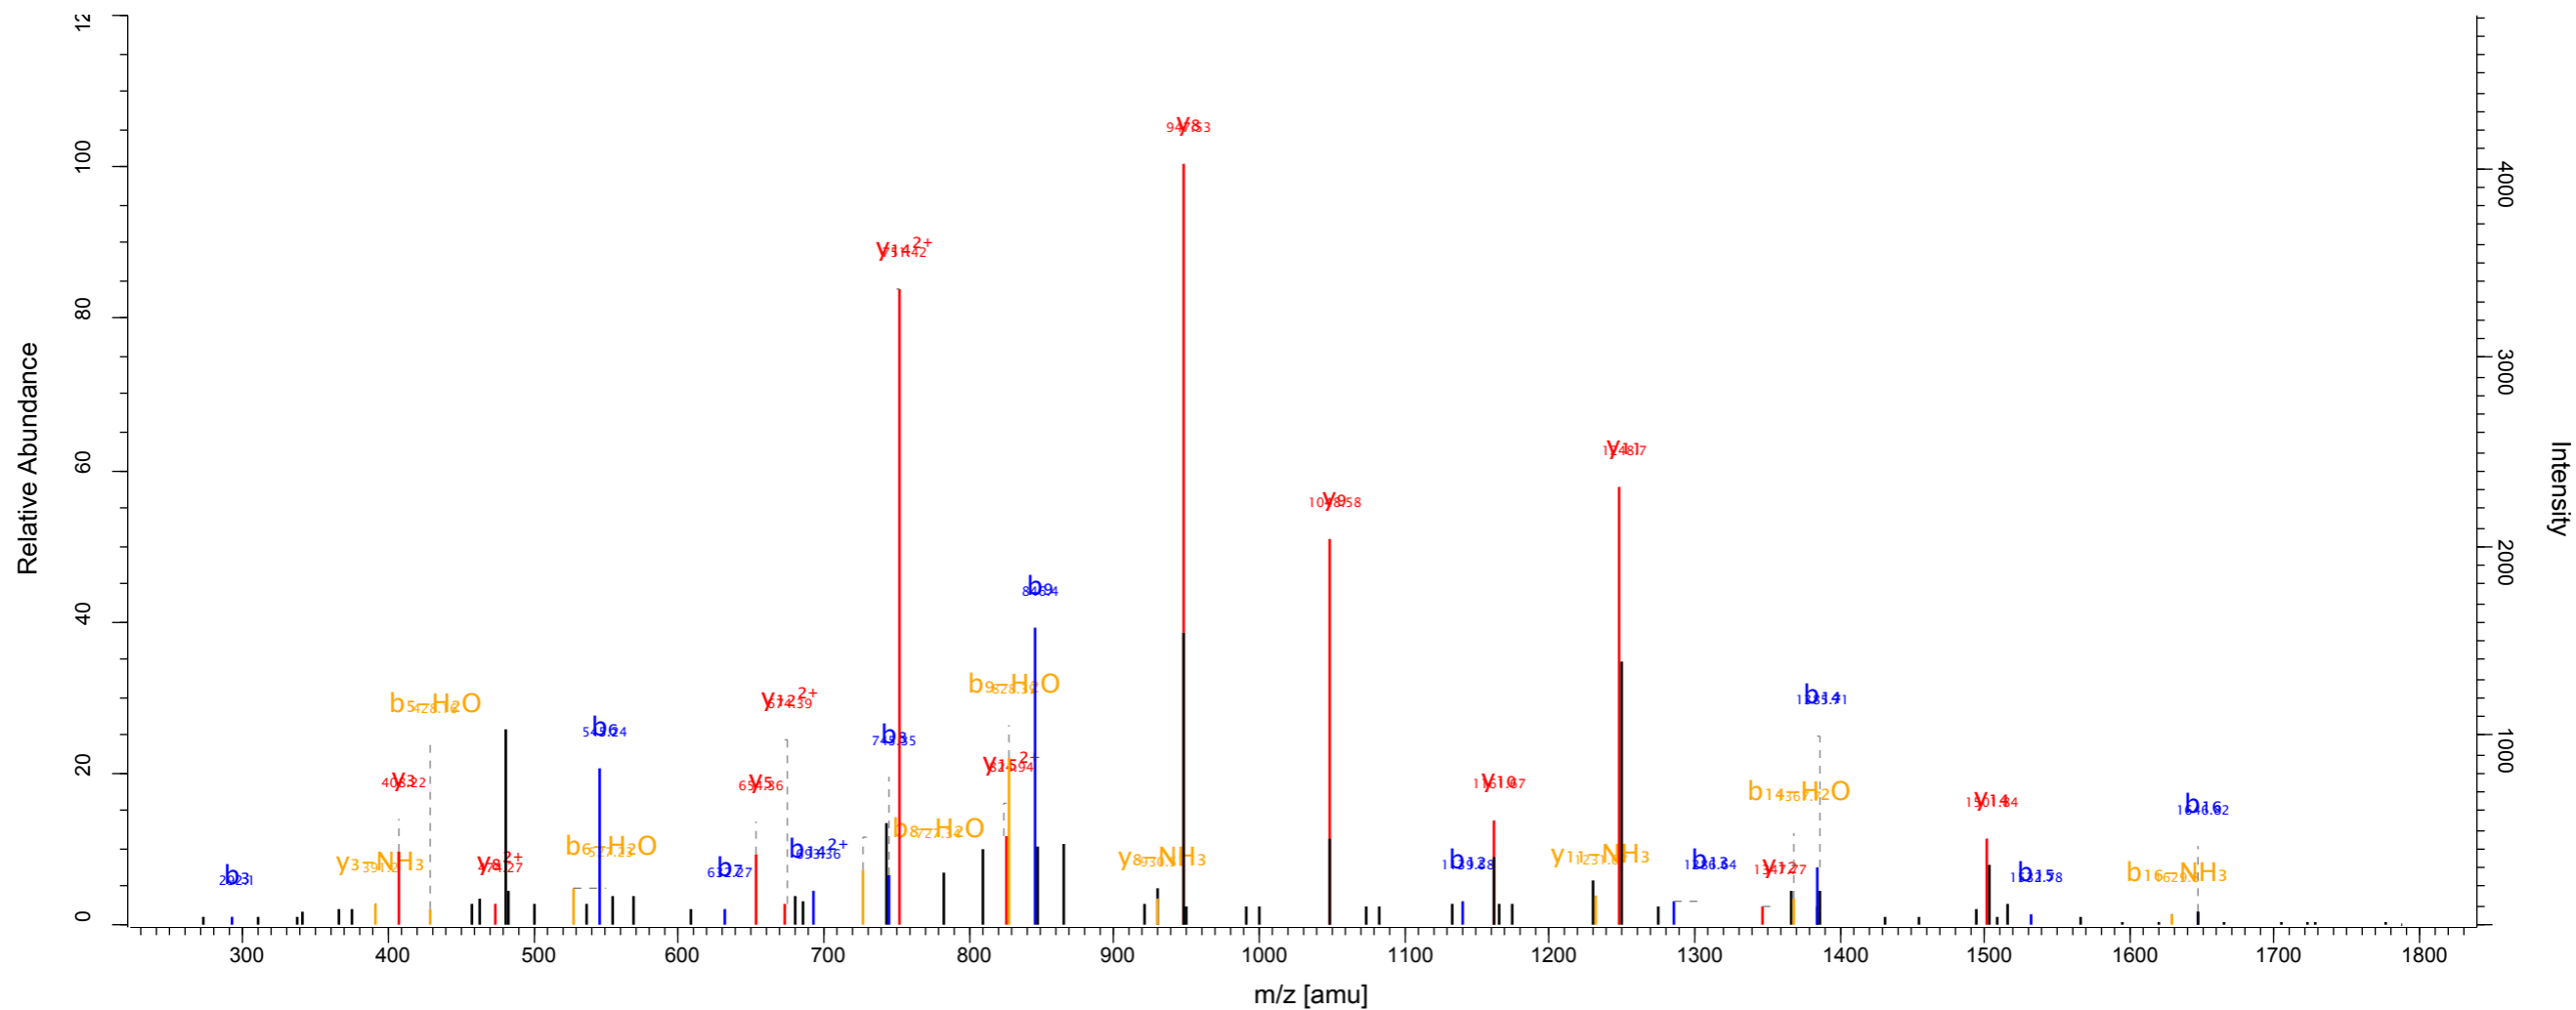

precursor information

|                   |                  |
|-------------------|------------------|
| Mass:             | 1701.02256       |
| m/z:              | 806.06856        |
| Charge:           | 2+               |
| Retention time:   | 02.0241546620850 |
| Score:            | 182.0612         |
| Mass Error [ppm]: | 0.21177          |
| PEP:              | 7.57465e-18      |
| Precursor Type:   | ISO              |

| b <sup>2+</sup> ion |              | b ion      |              |    |     |    | y ion        |            | y <sup>2+</sup> ion |            |
|---------------------|--------------|------------|--------------|----|-----|----|--------------|------------|---------------------|------------|
| Δ dalton            | mass         | Δ dalton   | mass         |    | seq |    | Δ dalton     | mass       | Δ dalton            | mass       |
|                     | 88.039304876 |            | 88.039304876 | 1  | S   | 16 |              |            |                     |            |
|                     | 145.0607686  |            | 145.0607686  | 2  | G   | 15 | 1705.8981903 |            | 1705.8981903        |            |
|                     | 292.09616783 | +0.05465   | 292.09616783 | 3  | M   | 14 | 1648.8767266 |            | 824.94200152        | +0.3487089 |
|                     | 389.14893168 |            | 389.14893168 | 4  | P   | 13 | 1501.8413273 | -0.0081975 | 751.4243019         | +0.1543724 |
|                     | 446.1703954  |            | 446.1703954  | 5  | G   | 12 | 1404.7885635 |            | 1404.7885635        |            |
|                     | 545.23880932 | -0.0771272 | 545.23880932 | 6  | V   | 11 | 1347.7670998 | -0.3298439 | 674.38718812        | -0.4005548 |
|                     | 632.27083773 | +0.0634518 | 632.27083773 | 7  | S   | 10 | 1248.6986859 | -0.122514  | 1248.6986859        |            |
|                     | 745.35490171 | -0.0524725 | 745.35490171 | 8  | I   | 9  | 1161.6666574 | -0.1101389 | 1161.6666574        |            |
|                     | 846.40258018 | -0.0928268 | 846.40258018 | 9  | T   | 8  | 1048.5825935 | -0.0677009 | 1048.5825935        |            |
|                     | 943.45534404 |            | 943.45534404 | 10 | P   | 7  | 947.53491499 | -0.1073637 | 474.27109573        | -0.2620625 |
|                     | 1040.5081079 |            | 1040.5081079 | 11 | P   | 6  | 850.48215113 |            | 850.48215113        |            |
|                     | 1139.5765218 | -0.050887  | 1139.5765218 | 12 | V   | 5  | 753.42938728 |            | 753.42938728        |            |
|                     | 1286.6449357 | -0.0815812 | 1286.6449357 | 13 | F   | 4  | 654.36097337 | -0.0088005 | 654.36097337        |            |
| +0.0593036          | 693.36031305 | -0.1885694 | 1385.7133496 | 14 | V   | 3  | 507.29255945 |            | 507.29255945        |            |
|                     | 1532.7817636 | +0.1083732 | 1532.7817636 | 15 | F   | 2  | 408.22414553 | -0.0343262 | 408.22414553        |            |
|                     | 1646.824691  | -0.2071373 | 1646.824691  | 16 | N   | 1  | 261.15573162 |            | 261.15573162        |            |
|                     |              |            |              | 17 | K   | 0  | 147.11280417 |            | 147.11280417        |            |

general information

|                       |             |
|-----------------------|-------------|
| Annotation:           | 13 of 17    |
| AminoAcids Coverage:  | 76 %        |
| Intensity Coverage:   | 64 %        |
| Peak Coverage:        | 26 %        |
| Protein Localisation: | 186 ... 202 |

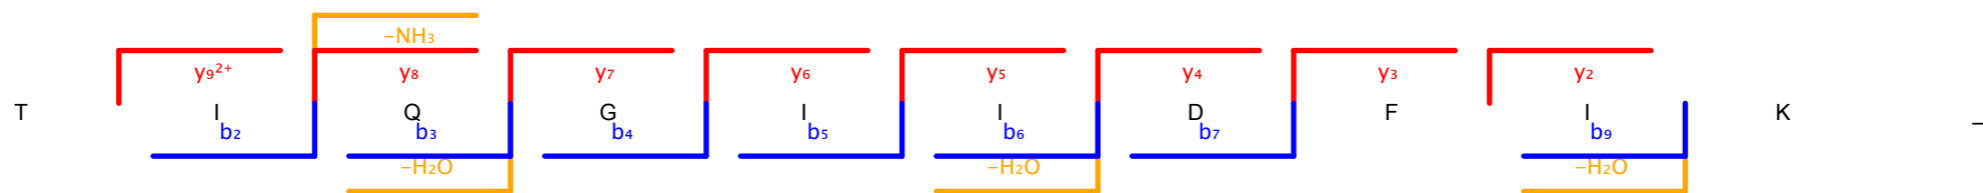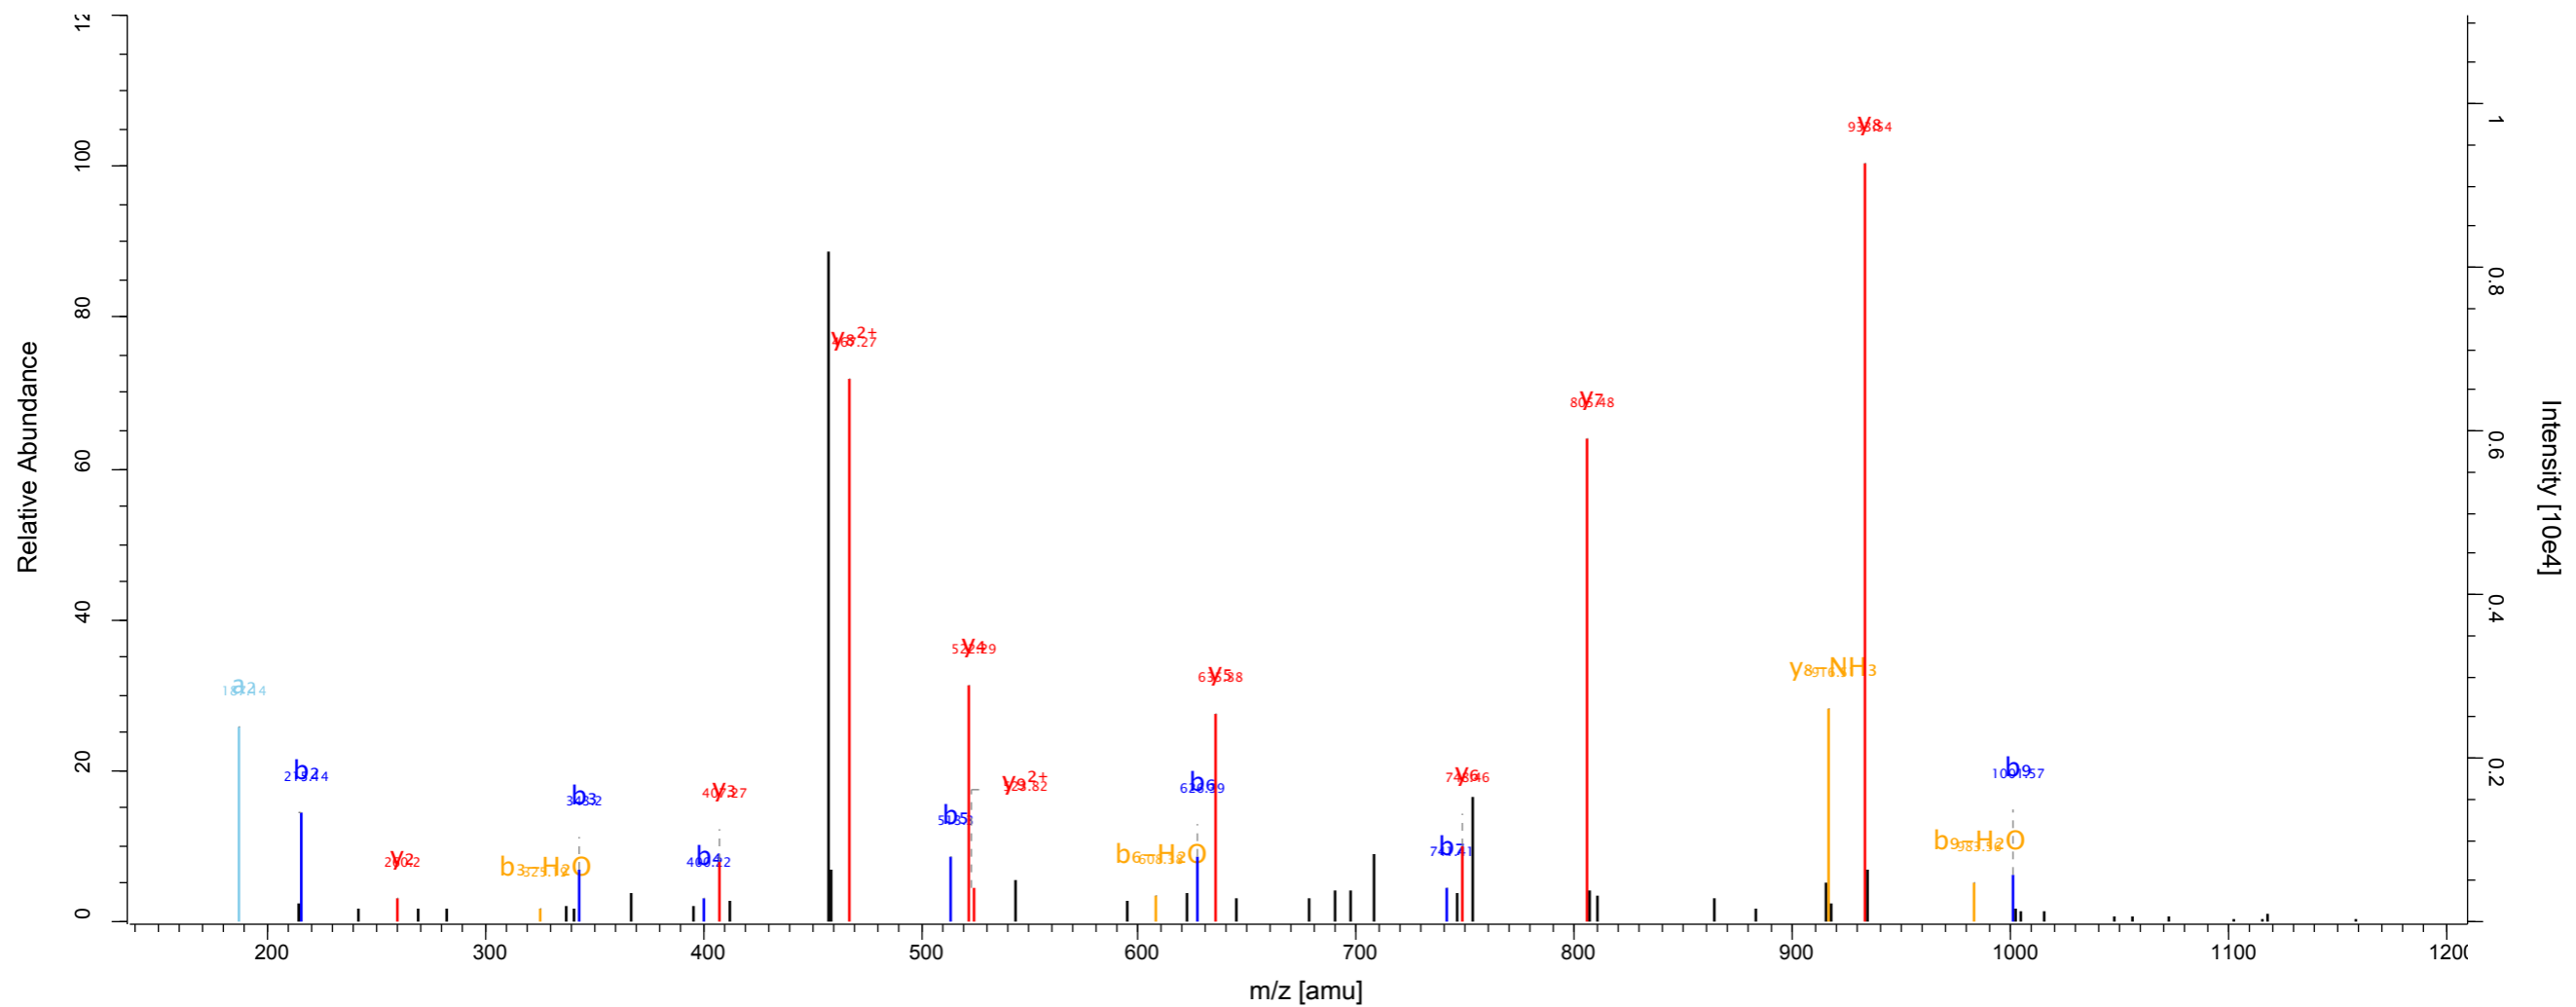

precursor information

|                       |                  |
|-----------------------|------------------|
| Mass:                 | 1146.66485       |
| m/z:                  | 574.3307         |
| Charge:               | 2+               |
| Retention time:       | 05.6546020507813 |
| Score:                | 160.374          |
| Mass Error (ppm):     | -0.012802        |
| DEP:                  | 7.546E-06        |
| 96 Precursor Type:    | MULTI            |
| Annotation:           | 8 of 10          |
| AminoAcids Coverage:  | 80 %             |
| Intensity Coverage:   | 68 %             |
| Peak Coverage:        | 36 %             |
| Protein Localisation: | 80 ... 89        |

| a ion     |              | b ion      |              |    |     |   | y ion        |            | y <sup>2+</sup> ion |            |
|-----------|--------------|------------|--------------|----|-----|---|--------------|------------|---------------------|------------|
| Δ dalton  | mass         | Δ dalton   | mass         |    | seq |   | Δ dalton     | mass       | Δ dalton            | mass       |
|           | 74.060040319 |            | 102.05495494 | 1  | T   | 9 |              |            |                     |            |
| -0.069855 | 187.1441043  | +0.046177  | 215.13901892 | 2  | I   | 8 | 1046.6244583 |            | 523.81586737        | +0.0582171 |
|           | 315.20268181 | -0.1303357 | 343.19759643 | 3  | Q   | 7 | 933.5403943  | -0.0721326 | 467.27383538        | -0.0402538 |
|           | 372.22414553 | -0.0083058 | 400.21906016 | 4  | G   | 6 | 805.48181678 | -0.0714164 | 805.48181678        |            |
|           | 485.30820951 | +0.0933602 | 513.30312414 | 5  | I   | 5 | 748.46035306 | -0.1073257 | 748.46035306        |            |
|           | 598.39227349 | +0.0219305 | 626.38718812 | 6  | I   | 4 | 635.37628908 | -0.0571362 | 635.37628908        |            |
|           | 713.41921653 | -0.1644363 | 741.41413115 | 7  | D   | 3 | 522.2922251  | -0.1191294 | 522.2922251         |            |
|           | 860.48763044 |            | 888.48254507 | 8  | F   | 2 | 407.26528207 | -0.1079334 | 407.26528207        |            |
|           | 973.57169442 | -0.1803175 | 1001.566609  | 9  | I   | 1 | 260.19686815 | +0.0702827 | 260.19686815        |            |
|           |              |            |              | 10 | K   | 0 | 147.11280417 |            | 147.11280417        |            |

Scan number 18608 Raw file 20091021\_Orbi6\_MaHe\_SA\_ADH\_exp3\_30h\_Gel10\_091024034333  
 Method ITMS; CID Genenames TYMP

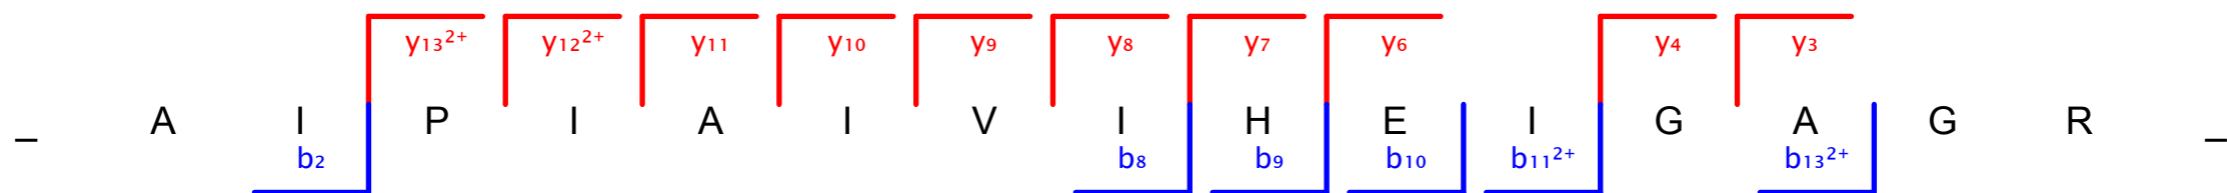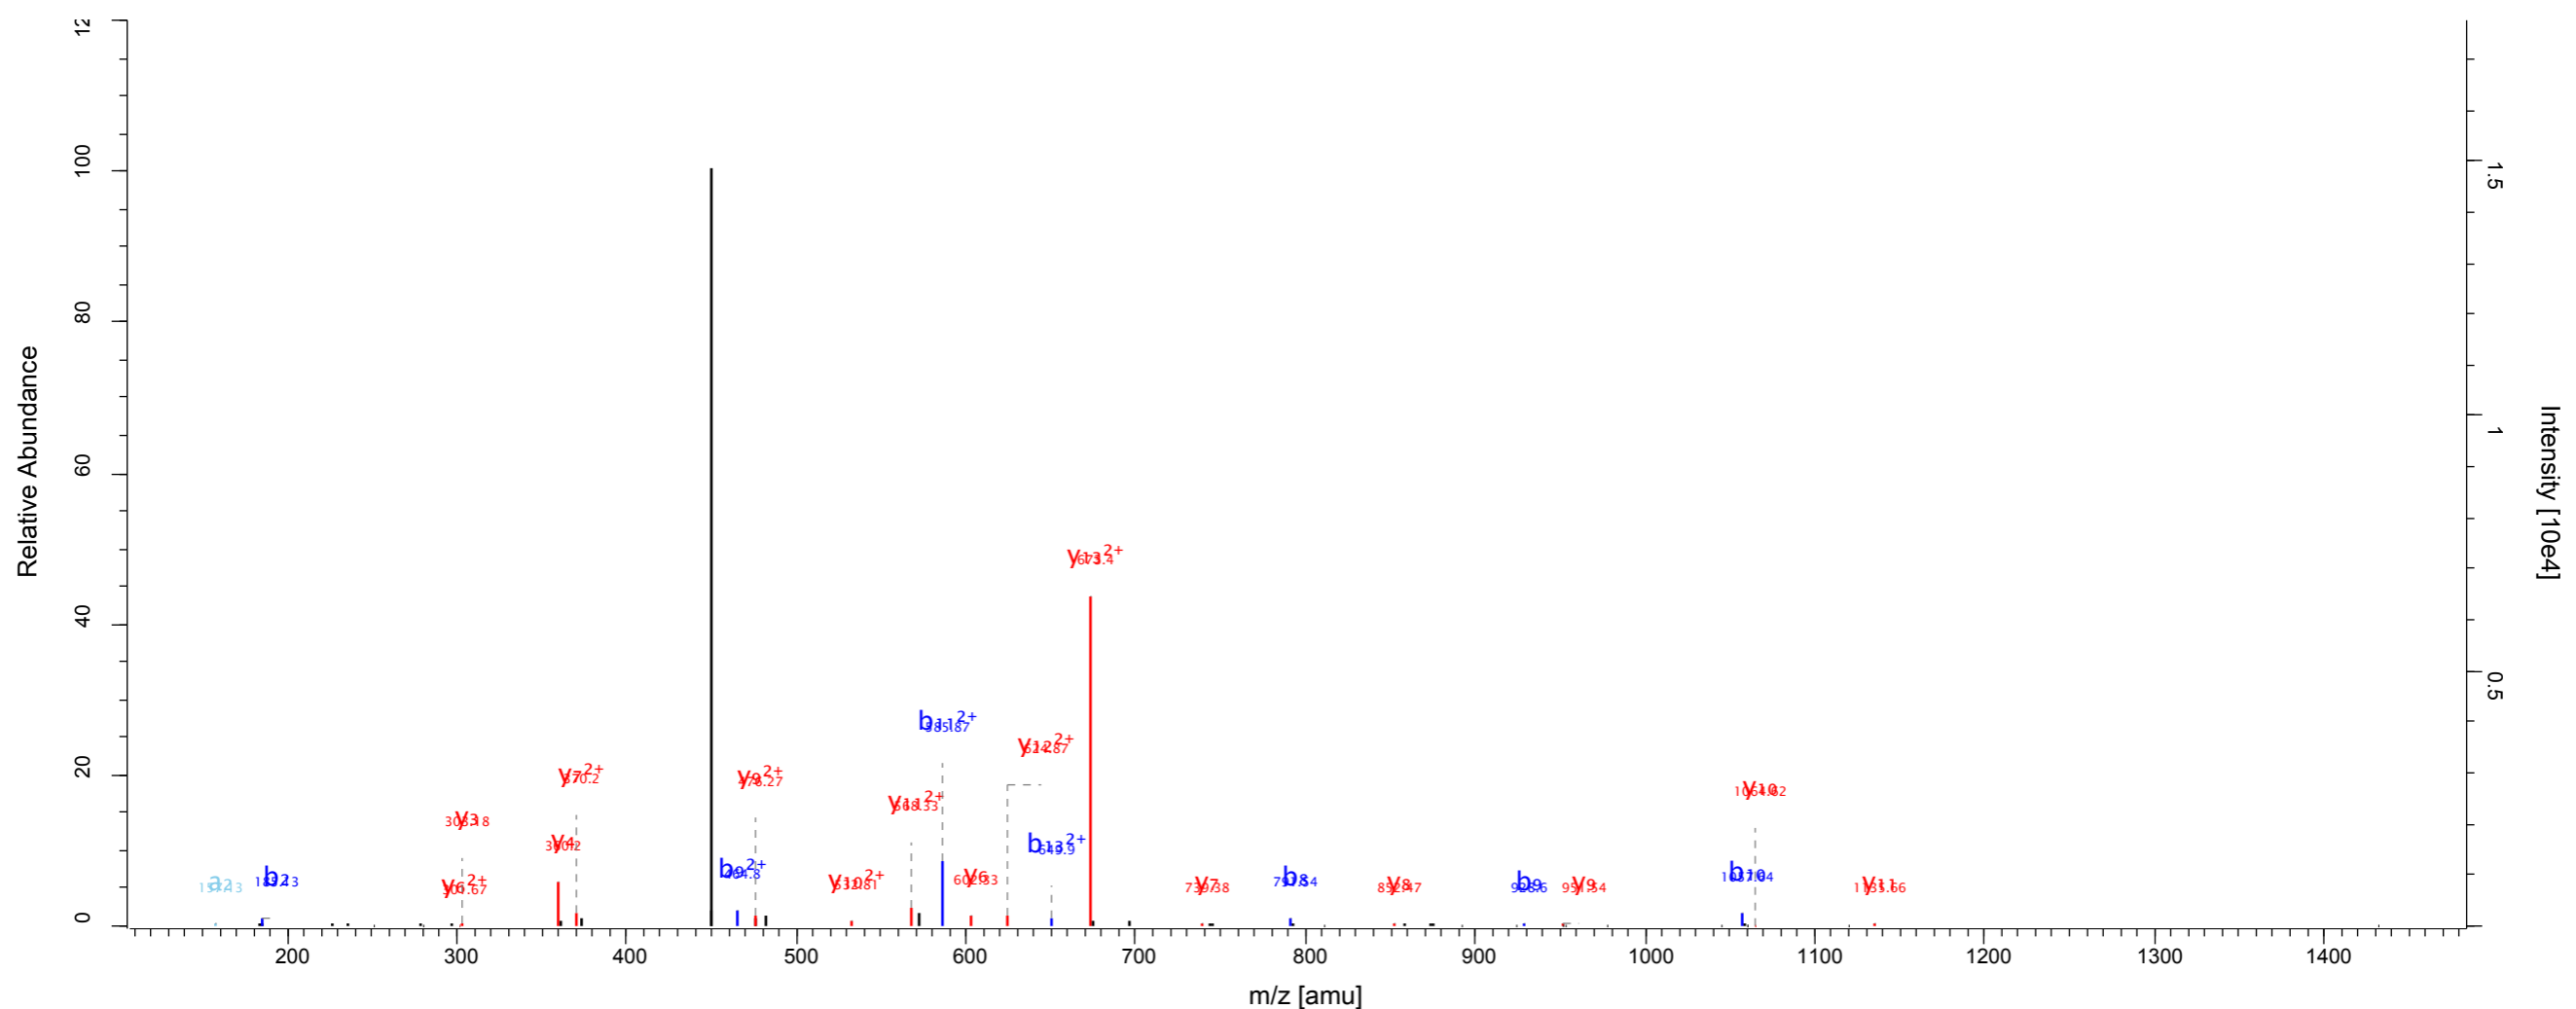

precursor information

|                   |                  |
|-------------------|------------------|
| Mass:             | 1528.00880       |
| m/z:              | 510.64257        |
| Charge:           | 2+               |
| Potentiaetime:    | 100.710746765127 |
| Score:            | 161.0885         |
| Mass Error [ppm]: | -0.027678        |
| DEP:              | 4.1252E-14       |
| Precursor Type:   | MULTI            |

| a ion      |            | b <sup>2+</sup> ion |            | b ion      |            |    |     |    | y ion      |            | y <sup>2+</sup> ion |            |
|------------|------------|---------------------|------------|------------|------------|----|-----|----|------------|------------|---------------------|------------|
| Δ dalton   | mass       | Δ dalton            | mass       | Δ dalton   | mass       |    | seq |    | Δ dalton   | mass       | Δ dalton            | mass       |
|            | 44.0494756 |                     | 72.0443903 |            | 72.0443903 | 1  | A   | 14 |            |            |                     |            |
| +0.0547691 | 157.13354  |                     | 185.128454 | +0.1216526 | 185.128454 | 2  | I   | 13 | 1458.87911 |            | 1458.87911          |            |
|            | 254.186303 |                     | 282.181218 |            | 282.181218 | 3  | P   | 12 | 1345.79505 |            | 673.401161          | +0.2130967 |
|            | 367.270367 |                     | 395.265282 |            | 395.265282 | 4  | I   | 11 | 1248.74228 |            | 624.874779          | +0.0029673 |
|            | 438.307481 |                     | 466.302396 |            | 466.302396 | 5  | A   | 10 | 1135.65822 | +0.2577976 | 568.332747          | -0.1401813 |
|            | 551.391545 |                     | 579.38646  |            | 579.38646  | 6  | I   | 9  | 1064.6211  | +0.1202288 | 532.81419           | -0.0160336 |
|            | 650.459959 |                     | 678.454874 |            | 678.454874 | 7  | V   | 8  | 951.53704  | -0.2905193 | 476.272158          | +0.0522435 |
|            | 763.544023 |                     | 791.538938 | -0.1631443 | 791.538938 | 8  | I   | 7  | 852.468626 | -0.214537  | 852.468626          |            |
|            | 900.602935 | +0.0054814          | 464.802563 | -0.0907085 | 928.59785  | 9  | H   | 6  | 739.384562 | +0.1839191 | 370.195919          | +0.0706822 |
|            | 1029.64553 |                     | 1057.64044 | -0.1525277 | 1057.64044 | 10 | E   | 5  | 602.32565  | -0.1141637 | 301.666463          | +0.440287  |
|            | 1142.72959 | +0.0883931          | 585.865892 |            | 1170.72451 | 11 | I   | 4  | 473.283057 |            | 473.283057          |            |
|            | 1199.75106 |                     | 1227.74597 |            | 1227.74597 | 12 | G   | 3  | 360.198993 | -0.0803411 | 360.198993          |            |
|            | 1270.78817 | -0.3384787          | 649.89518  |            | 1298.78308 | 13 | A   | 2  | 303.17753  | +0.0401827 | 303.17753           |            |
|            | 1327.80963 |                     | 1355.80455 |            | 1355.80455 | 14 | G   | 1  | 232.140416 |            | 232.140416          |            |
|            |            |                     |            |            |            | 15 | R   | 0  | 175.118952 |            | 175.118952          |            |

general information

|                       |             |
|-----------------------|-------------|
| Annotation:           | 12 of 15    |
| AminoAcids Coverage:  | 80%         |
| Intensity Coverage:   | 40%         |
| Peak Coverage:        | 40%         |
| Protein Localisation: | 394 ... 408 |

Scan number 1512 Raw file 20091021\_Orbi6\_MaHe\_SA\_ADH\_exp3\_30h\_Gel12  
 Method ITMS; CID Genenames SLCO2A1

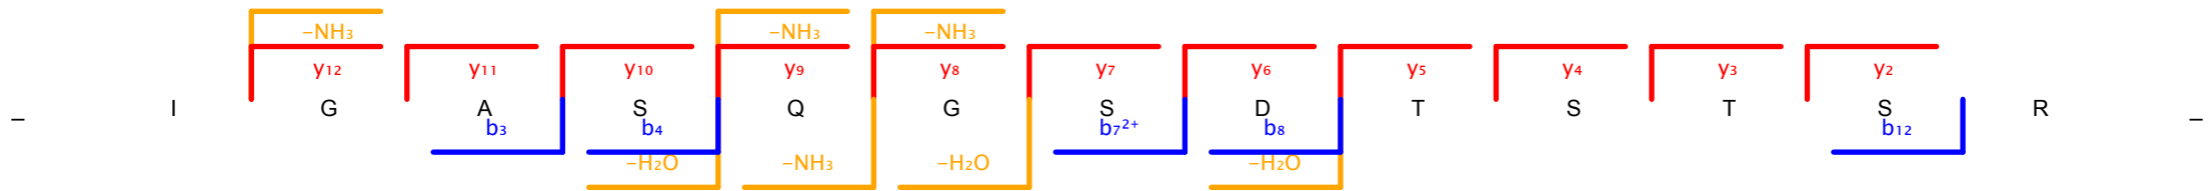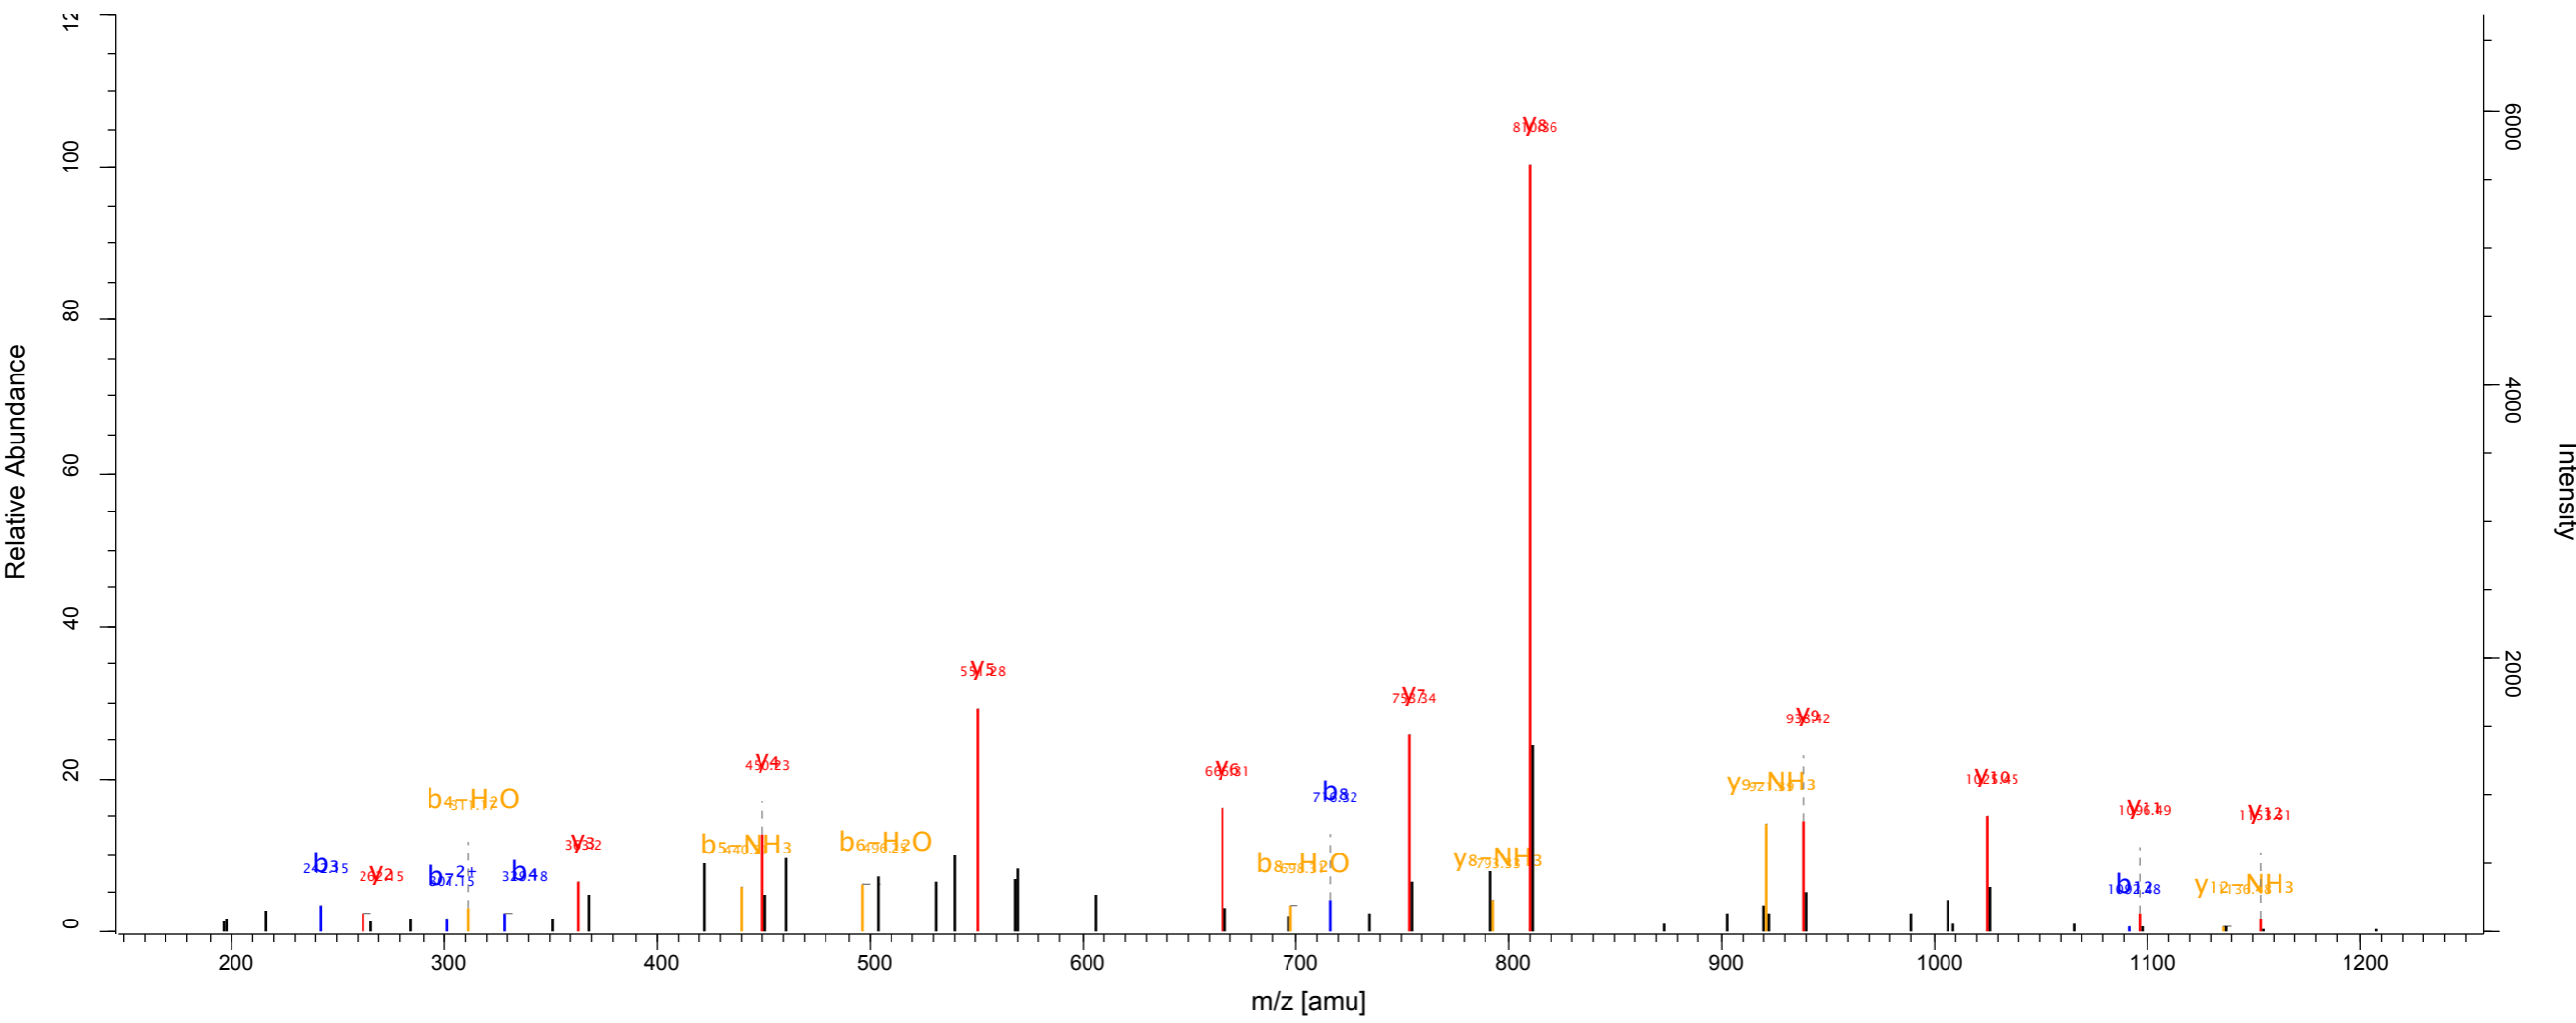

precursor information

|                   |                  |
|-------------------|------------------|
| Mass:             | 1265.58455       |
| m/z:              | 622.70055        |
| Charge:           | 2+               |
| Retention time:   | 10.3582286824717 |
| Score:            | 128.8460         |
| Mass Error (ppm): | -0.17762         |
| PEP:              | 0.0002007        |
| Precursor Type:   | ISO              |

general information

|                       |          |
|-----------------------|----------|
| Annotation:           | 11 of 12 |
| AminoAcids Coverage:  | 85 %     |
| Intensity Coverage:   | 62 %     |
| Peak Coverage:        | 20 %     |
| Protein Localisation: | 7 ... 19 |

| b <sup>2+</sup> ion |                | b ion      |                |     | y ion |          |                           |
|---------------------|----------------|------------|----------------|-----|-------|----------|---------------------------|
| Δ dalton            | mass           | Δ dalton   | mass           | seq |       | Δ dalton | mass                      |
|                     | 114.091340447  |            | 114.091340447  | 1   | I     | 12       |                           |
|                     | 171.112804171  |            | 171.112804171  | 2   | G     | 11       | 1153.507984547 -0.1405529 |
|                     | 242.149917958  | +0.0328976 | 242.149917958  | 3   | A     | 10       | 1096.486520824 +0.0122585 |
|                     | 329.181946368  | +0.2051386 | 329.181946368  | 4   | S     | 9        | 1025.449407036 -0.1221365 |
|                     | 457.24052388   |            | 457.24052388   | 5   | Q     | 8        | 938.417378626 +0.0155437  |
|                     | 514.261987603  |            | 514.261987603  | 6   | G     | 7        | 810.358801114 -0.0518553  |
| -0.0490227          | 301.15064624   |            | 601.294016013  | 7   | S     | 6        | 753.337337391 -0.0263633  |
|                     | 716.320959045  | +0.0425663 | 716.320959045  | 8   | D     | 5        | 666.305308981 +0.0511974  |
|                     | 817.368637519  |            | 817.368637519  | 9   | T     | 4        | 551.278365949 -0.0014494  |
|                     | 904.400665929  |            | 904.400665929  | 10  | S     | 3        | 450.230687475 +0.1675059  |
|                     | 1005.448344403 |            | 1005.448344403 | 11  | T     | 2        | 363.198659065 +0.0308942  |
|                     | 1092.480372813 | -0.0680193 | 1092.480372813 | 12  | S     | 1        | 262.150980591 -0.0183512  |
|                     |                |            |                | 13  | R     | 0        | 175.118952181             |



Scan number 17628 Raw file 2091021\_Orbi6\_MaHe\_SA\_ADH\_exp3\_30h\_Gel12  
 Method ITMS; CID Genenames TRIM8

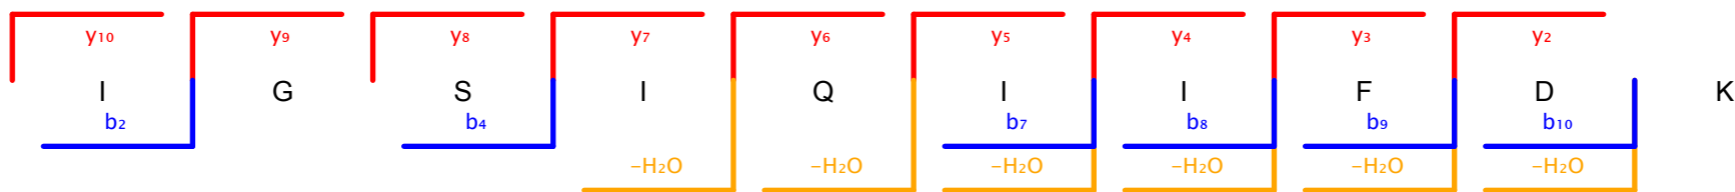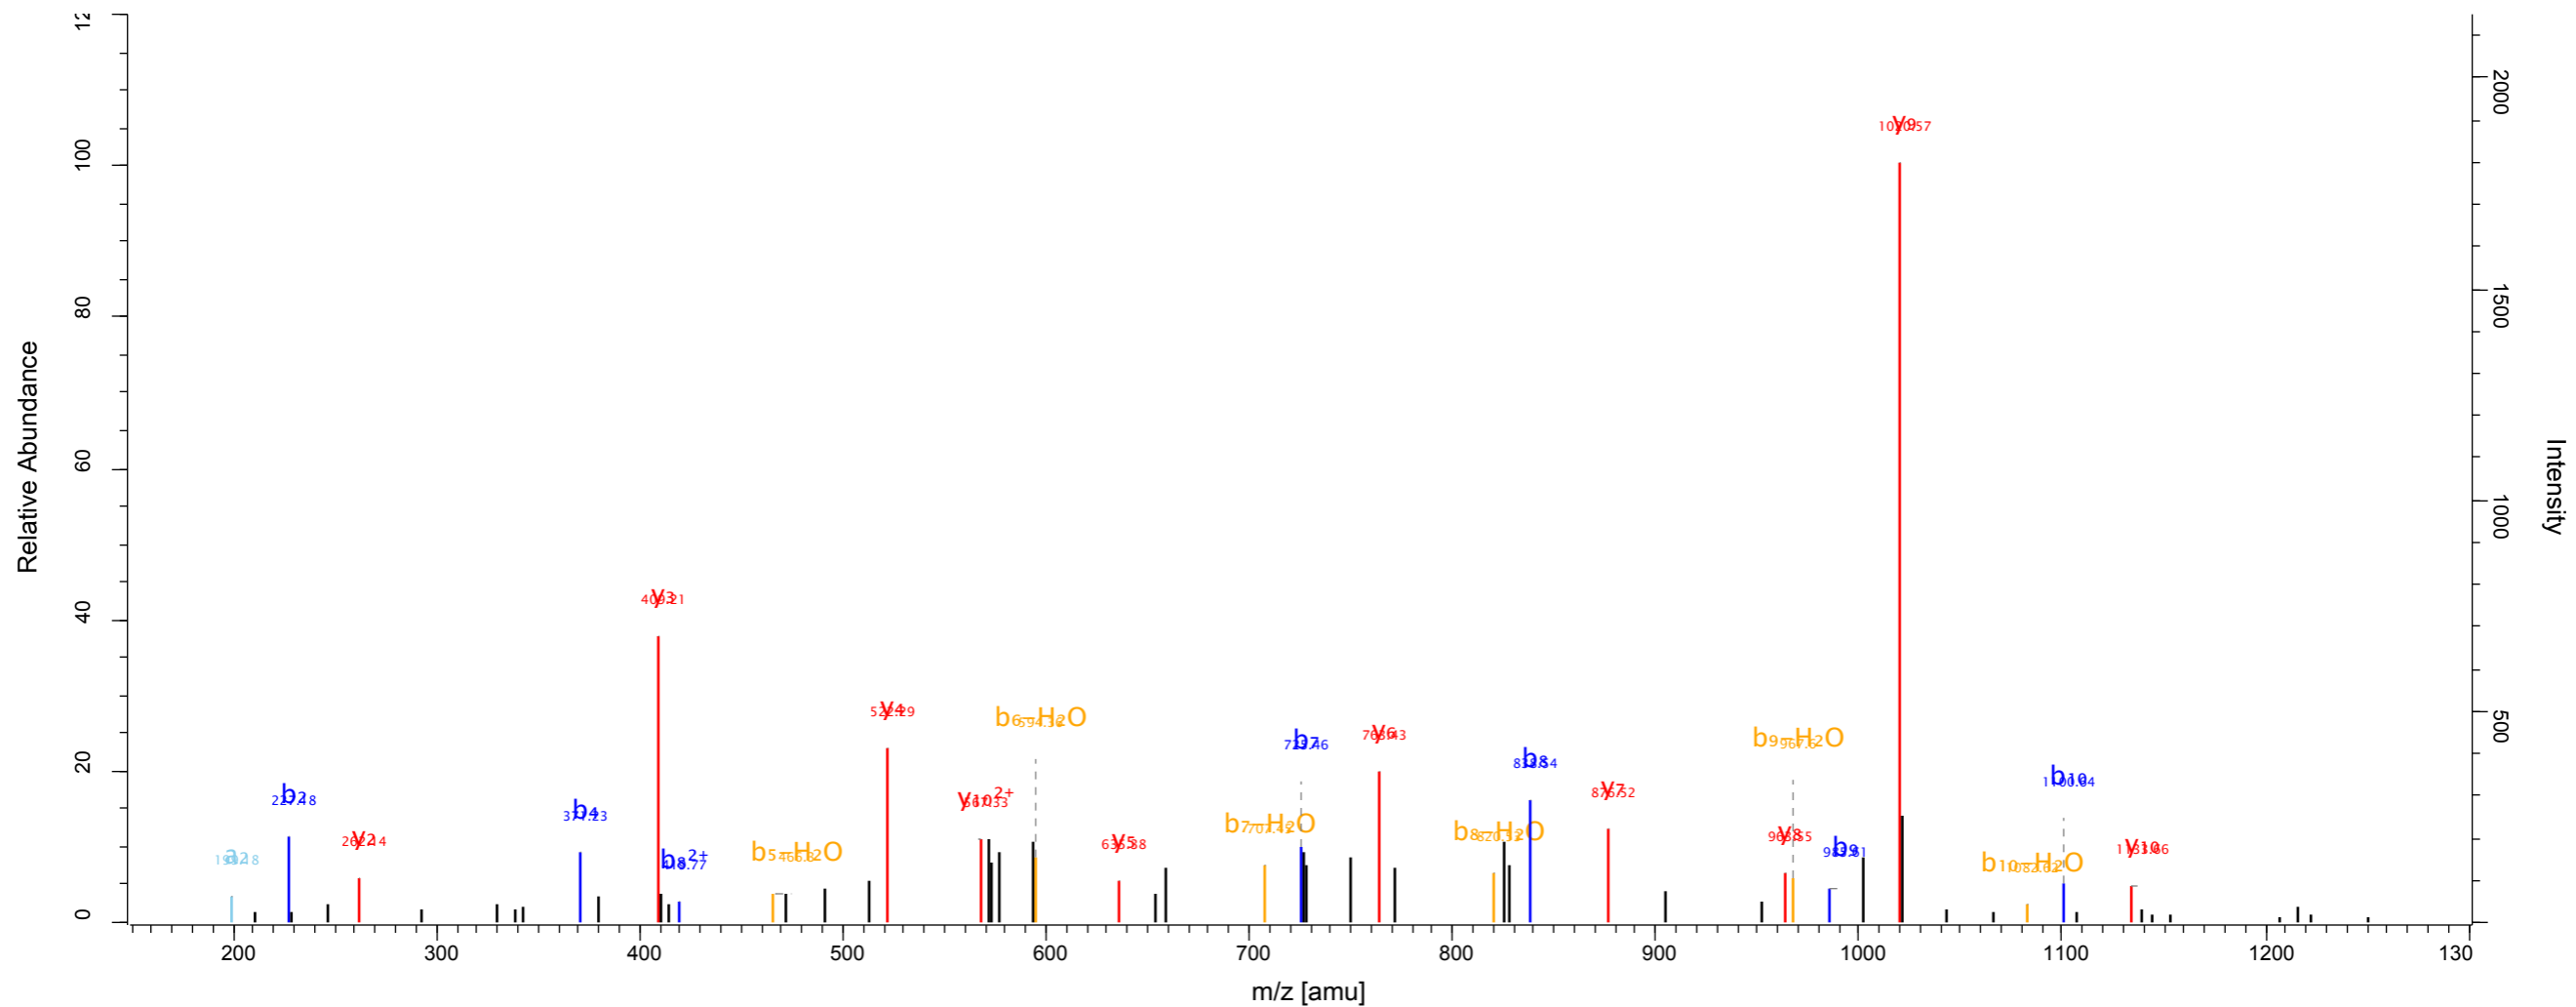

precursor information

|                   |                  |
|-------------------|------------------|
| Mass:             | 1245.72368       |
| m/z:              | 622.87412        |
| Charge:           | 2+               |
| Retention time:   | 102.610061014063 |
| Score:            | 150.0421         |
| Mass Error (ppm): | 0.32872          |
| PEP:              | 0.2824E-05       |
| Precursor Type:   | ISO              |

general information

|                       |             |
|-----------------------|-------------|
| Annotation:           | 0 of 11     |
| AminoAcids Coverage:  | 82 %        |
| Intensity Coverage:   | 64 %        |
| Peak Coverage:        | 38 %        |
| Protein Localisation: | 282 ... 292 |

| a ion      |            | b <sup>2+</sup> ion |            | b ion      |            |    |     |    | y ion      |            | y <sup>2+</sup> ion |            |
|------------|------------|---------------------|------------|------------|------------|----|-----|----|------------|------------|---------------------|------------|
| Δ dalton   | mass       | Δ dalton            | mass       | Δ dalton   | mass       |    | seq |    | Δ dalton   | mass       | Δ dalton            | mass       |
|            | 86.0964258 |                     | 114.09134  |            | 114.09134  | 1  | I   | 10 |            |            |                     |            |
| +0.0811069 | 199.18049  |                     | 227.175404 | -0.0292863 | 227.175404 | 2  | I   | 9  | 1133.65649 | +0.0294264 | 567.331882          | +0.0254793 |
|            | 256.201954 |                     | 284.196868 |            | 284.196868 | 3  | G   | 8  | 1020.57242 | -0.1071517 | 1020.57242          |            |
|            | 343.233982 |                     | 371.228897 | +0.0328222 | 371.228897 | 4  | S   | 7  | 963.550959 | -0.0185493 | 963.550959          |            |
|            | 456.318046 |                     | 484.312961 |            | 484.312961 | 5  | I   | 6  | 876.518931 | +0.0110377 | 876.518931          |            |
|            | 584.376623 |                     | 612.371538 |            | 612.371538 | 6  | Q   | 5  | 763.434867 | +0.064462  | 763.434867          |            |
|            | 697.460687 |                     | 725.455602 | -0.3979238 | 725.455602 | 7  | I   | 4  | 635.376289 | -0.0344922 | 635.376289          |            |
|            | 810.544751 | -0.3240083          | 419.773471 | -0.1290825 | 838.539666 | 8  | I   | 3  | 522.292225 | +0.0695303 | 522.292225          |            |
|            | 957.613165 |                     | 985.60808  | -0.241869  | 985.60808  | 9  | F   | 2  | 409.208161 | +0.0751641 | 409.208161          |            |
|            | 1072.64011 |                     | 1100.63502 | -0.2423228 | 1100.63502 | 10 | D   | 1  | 262.139747 | +0.029076  | 262.139747          |            |
|            |            |                     |            |            |            | 11 | K   | 0  | 147.112804 |            | 147.112804          |            |

Scan number 19715 Raw file 20091021\_Orbi6\_MaHe\_SA\_ADH\_exp3\_30h\_Gel12  
 Method ITMS; CID Genenames BANP

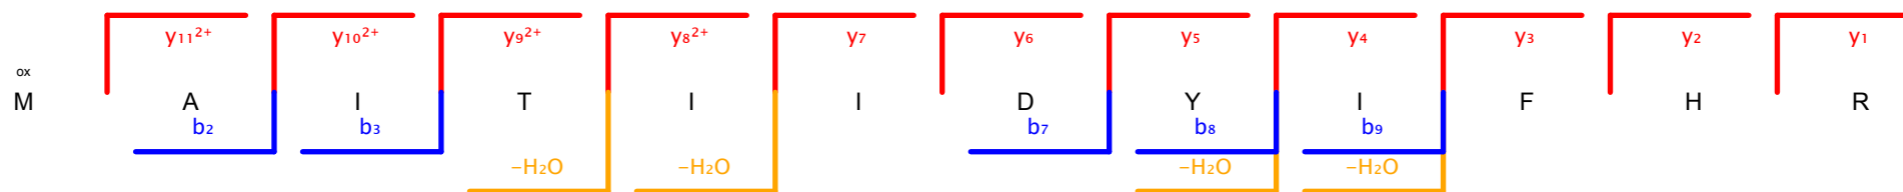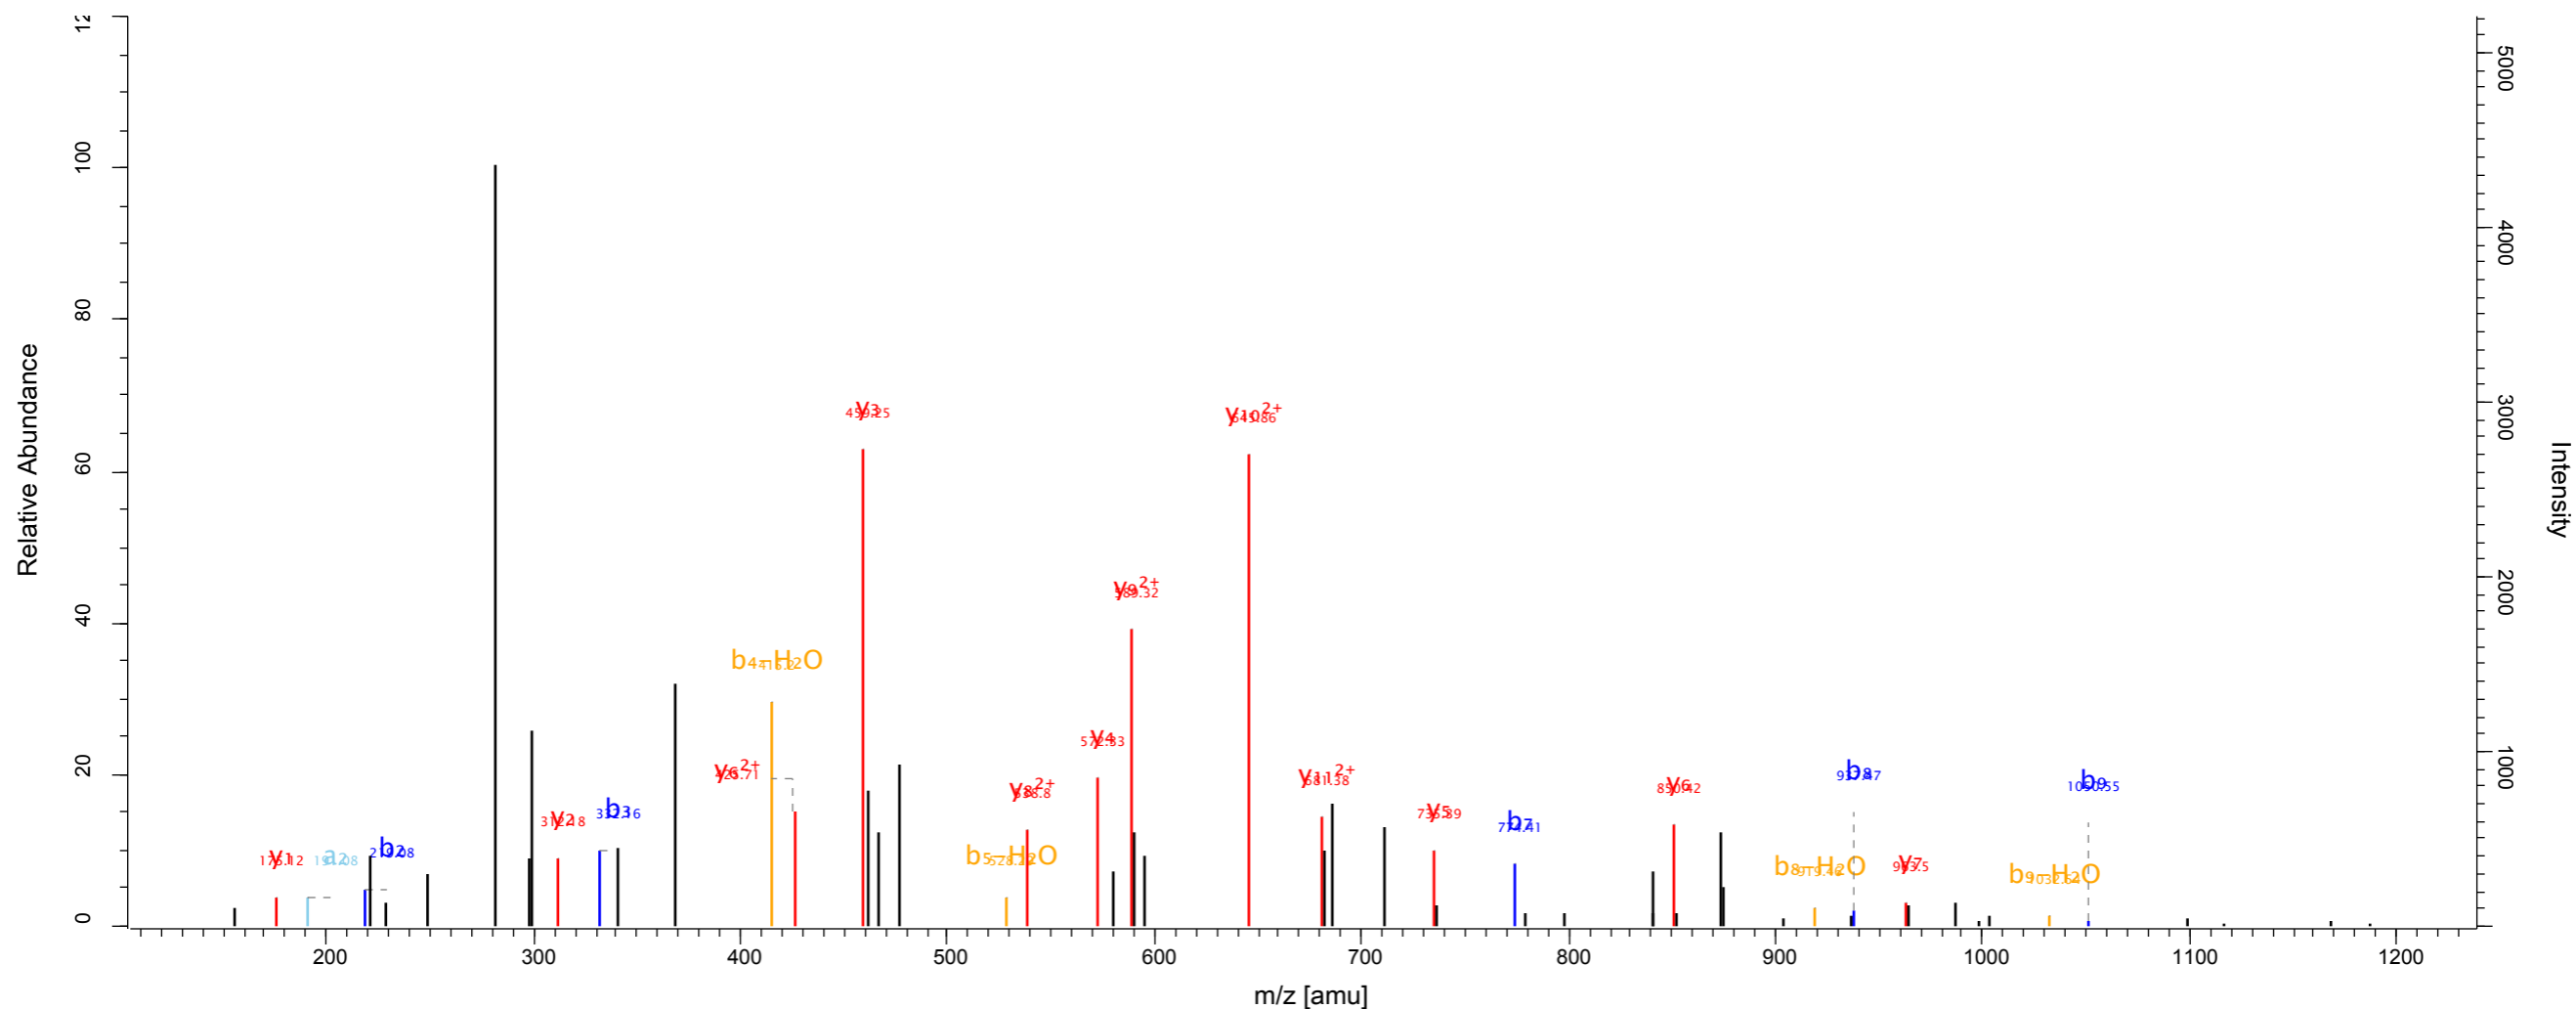

precursor information

|                   |                  |
|-------------------|------------------|
| Mass:             | 1507.785         |
| m/z:              | 502.60228        |
| Charge:           | 2+               |
| Retention time:   | 115.150126281738 |
| Score:            | 142.8267         |
| Mass Error [ppm]: | -0.47728         |
| PEP:              | 2.3006E-05       |
| Precursor Type:   | MULTI            |

general information

|                       |             |
|-----------------------|-------------|
| Annotation:           | 11 of 12    |
| AminoAcids Coverage:  | 92 %        |
| Intensity Coverage:   | 48 %        |
| Peak Coverage:        | 28 %        |
| Protein Localisation: | 251 ... 262 |

| a ion      |              | b ion      |              |    |     |    | y ion        |            | y <sup>2+</sup> ion |            |
|------------|--------------|------------|--------------|----|-----|----|--------------|------------|---------------------|------------|
| Δ dalton   | mass         | Δ dalton   | mass         |    | seq |    | Δ dalton     | mass       | Δ dalton            | mass       |
|            | 120.04776107 |            | 148.04267569 | 1  | M   | 11 |              |            |                     |            |
| +0.0593207 | 191.08487486 | -0.0076764 | 219.07978948 | 2  | A   | 10 | 1361.7575977 |            | 681.38243709        | -0.1099151 |
|            | 304.16893884 | -0.1508225 | 332.16385346 | 3  | I   | 9  | 1290.7204839 |            | 645.8638802         | +0.1024284 |
|            | 405.21661732 |            | 433.21153194 | 4  | T   | 8  | 1177.6364199 |            | 589.32184821        | -0.0074561 |
|            | 518.3006813  |            | 546.29559592 | 5  | I   | 7  | 1076.5887415 |            | 538.79800897        | -0.0267687 |
|            | 631.38474528 |            | 659.3796599  | 6  | I   | 6  | 963.50467749 | -0.0103538 | 963.50467749        |            |
|            | 746.41168831 | -0.2727528 | 774.40660293 | 7  | D   | 5  | 850.42061351 | -0.1607869 | 425.71394499        | +0.0227493 |
|            | 909.47501685 | +0.0237819 | 937.46993147 | 8  | Y   | 4  | 735.39367048 | +0.1030947 | 735.39367048        |            |
|            | 1022.5590808 | +0.2571618 | 1050.5539954 | 9  | I   | 3  | 572.33034194 | +0.0806688 | 572.33034194        |            |
|            | 1169.6274947 |            | 1197.6224094 | 10 | F   | 2  | 459.24627796 | -0.1434948 | 459.24627796        |            |
|            | 1306.6864066 |            | 1334.6813212 | 11 | H   | 1  | 312.17786404 | -0.0502395 | 312.17786404        |            |
|            |              |            |              | 12 | R   | 0  | 175.11895218 | +0.12705   | 175.11895218        |            |

Scan number 14529 Raw file 20091021\_Orbi6\_MaHe\_SA\_ADH\_exp3\_30h\_Gel13  
 Method ITMS; CID Genenames ATHL1

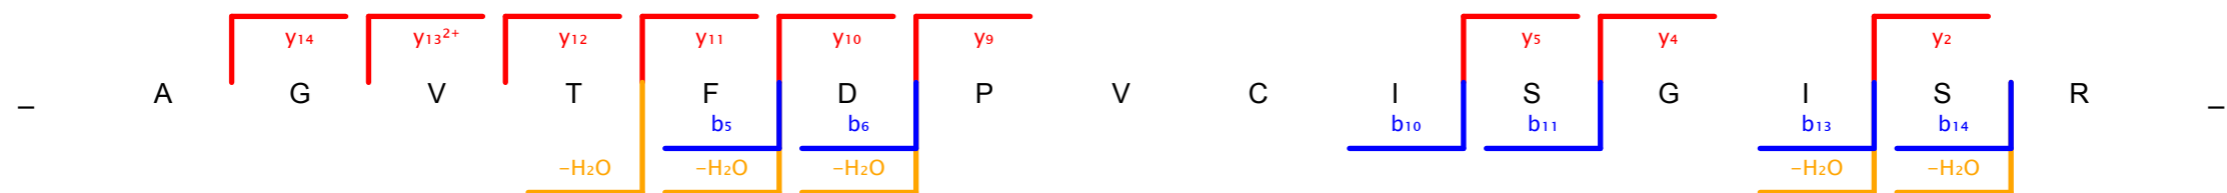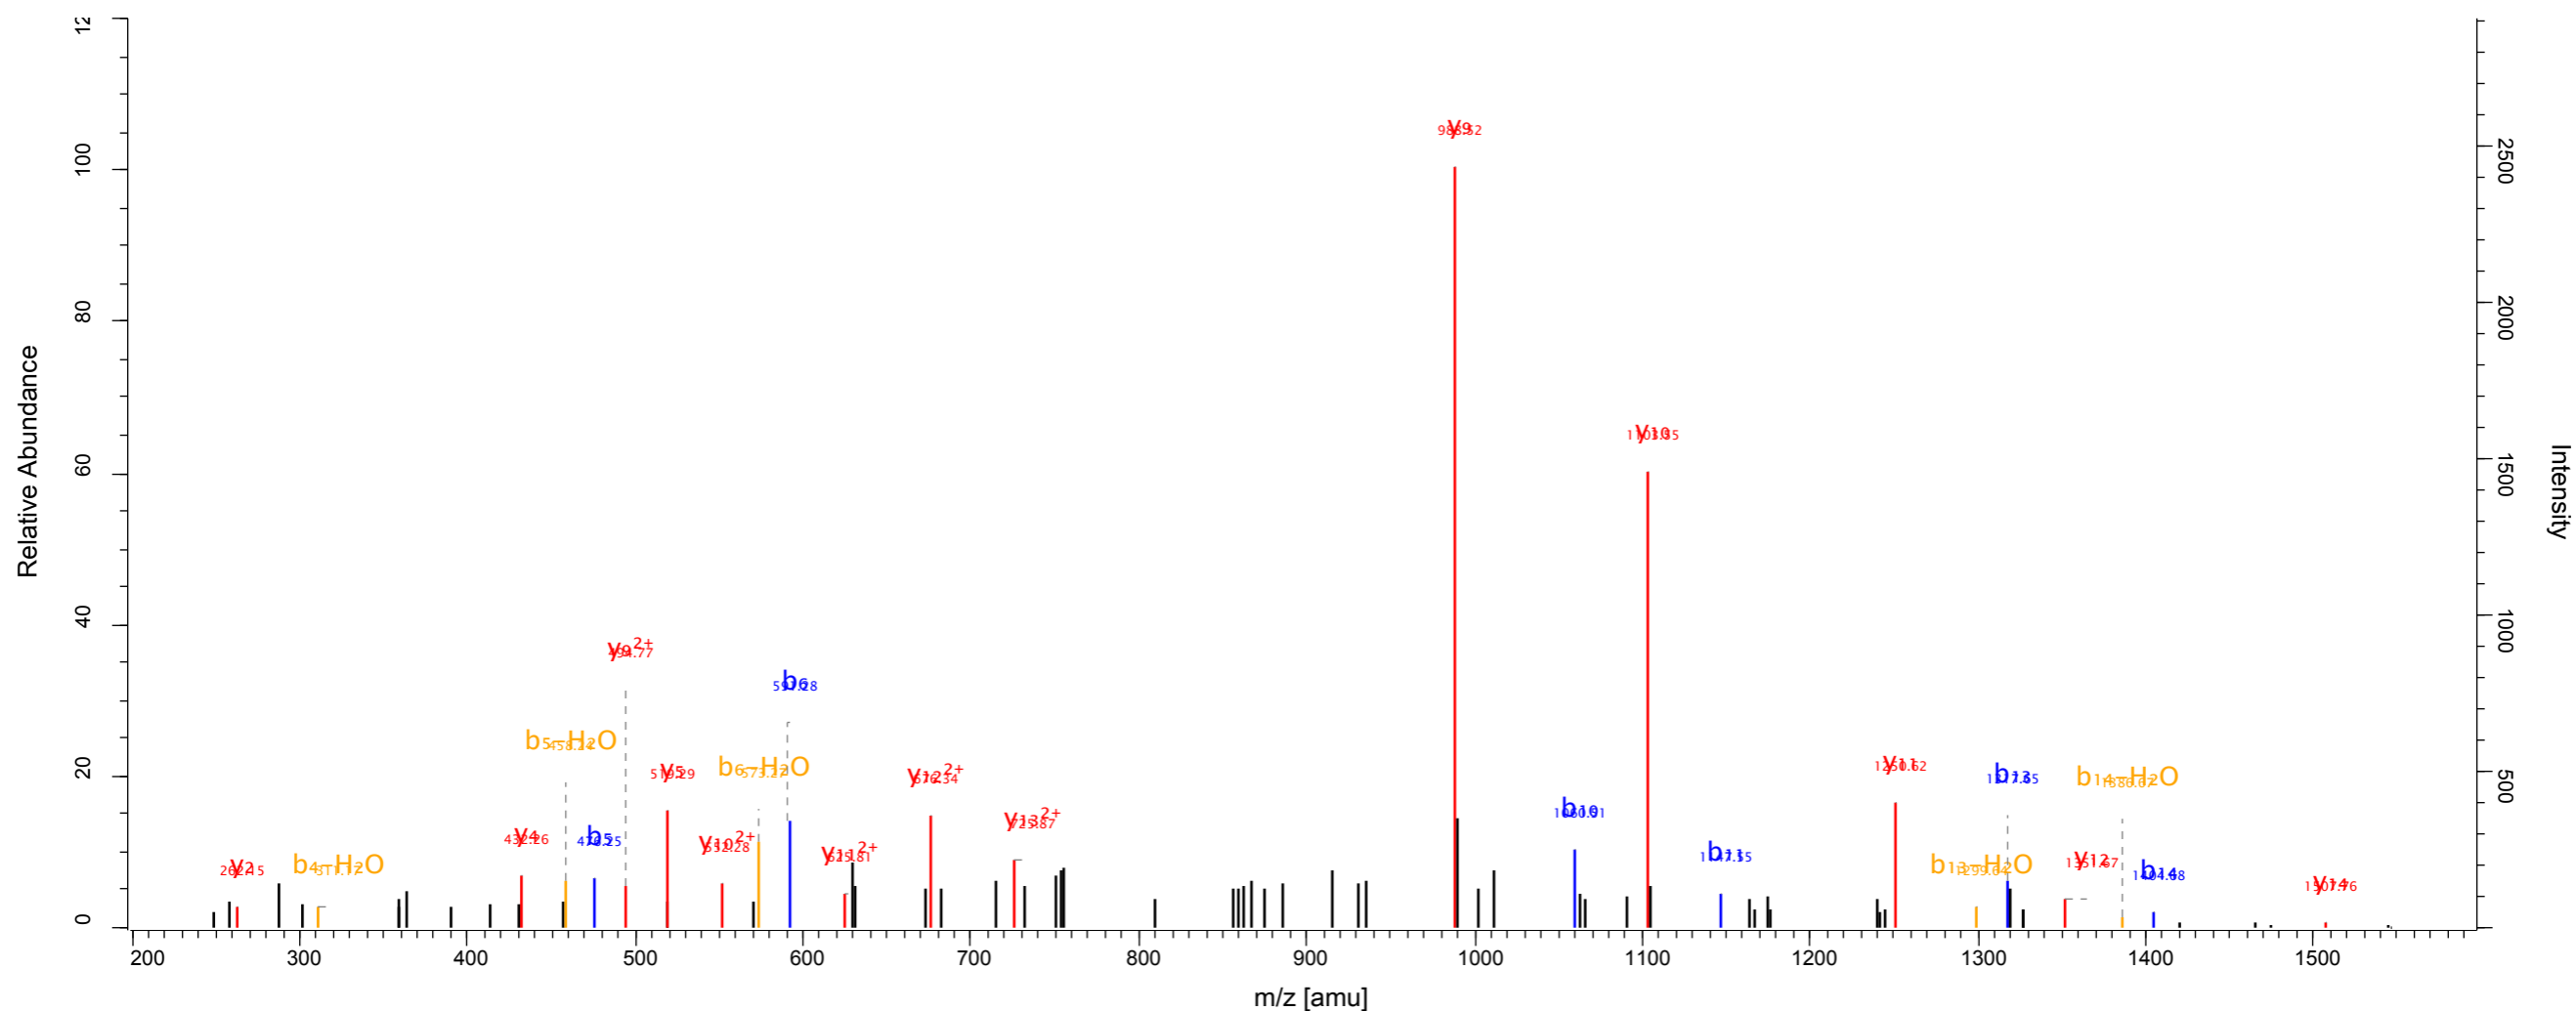

precursor information

|                   |                 |
|-------------------|-----------------|
| Mass:             | 1577.78725      |
| m/z:              | 780.00005       |
| Charge:           | 2+              |
| Potentiation:     | 82.555540621582 |
| Score:            | 142.4244        |
| Mass Error [ppm]: | 0.10781         |
| DEP:              | 2.6416E-05      |
| Precursor Type:   | ISO             |

| b ion      |                |    |     |    | y ion          |            | y <sup>2+</sup> ion |            |
|------------|----------------|----|-----|----|----------------|------------|---------------------|------------|
| Δ dalton   | mass           |    | seq |    | Δ dalton       | mass       | Δ dalton            | mass       |
|            | 72.044390254   | 1  | A   | 14 |                |            |                     |            |
|            | 129.065853978  | 2  | G   | 13 | 1507.757339717 | -0.1706698 | 1507.757339717      |            |
|            | 228.134267894  | 3  | V   | 12 | 1450.735875993 |            | 725.87157623        | +0.3621274 |
|            | 329.181946368  | 4  | T   | 11 | 1351.667462077 | +0.1109803 | 676.337369272       | +0.0345179 |
| -0.1099794 | 476.250360284  | 5  | F   | 10 | 1250.619783603 | -0.0618002 | 625.813530035       | -0.3767014 |
| +0.0927528 | 591.277303316  | 6  | D   | 9  | 1103.551369687 | +0.0064916 | 552.279323077       | +0.1299176 |
|            | 688.330067168  | 7  | P   | 8  | 988.524426655  | -0.0378544 | 494.765851561       | +0.0404229 |
|            | 787.398481085  | 8  | V   | 7  | 891.471662803  |            | 891.471662803       |            |
|            | 947.429129286  | 9  | C   | 6  | 792.403248887  |            | 792.403248887       |            |
| +0.0162257 | 1060.513193266 | 10 | I   | 5  | 632.372600685  |            | 632.372600685       |            |
| -0.1719307 | 1147.545221676 | 11 | S   | 4  | 519.288536705  | +0.1023324 | 519.288536705       |            |
|            | 1204.5666854   | 12 | G   | 3  | 432.256508295  | -0.0523457 | 432.256508295       |            |
| -0.0711595 | 1317.65074938  | 13 | I   | 2  | 375.235044571  |            | 375.235044571       |            |
| +0.0873638 | 1404.68277779  | 14 | S   | 1  | 262.150980591  | +0.0876058 | 262.150980591       |            |
|            |                | 15 | R   | 0  | 175.118952181  |            | 175.118952181       |            |

general information

|                       |             |
|-----------------------|-------------|
| Annotation:           | 11 of 15    |
| AminoAcids Coverage:  | 72%         |
| Intensity Coverage:   | 57%         |
| Peak Coverage:        | 21%         |
| Protein Localisation: | 634 ... 648 |

Scan number 9938 Raw file 20091021\_Orbi6\_MaHe\_SA\_ADH\_exp3\_30h\_Gel15  
 Method ITMS; CID Genenames C9orf63

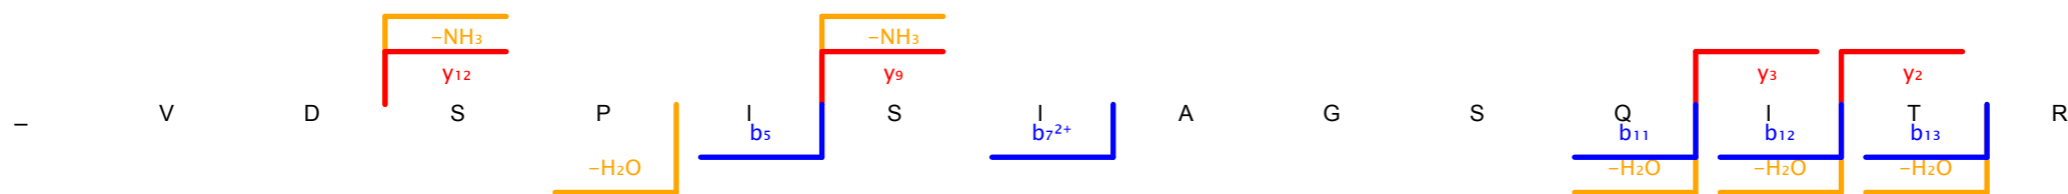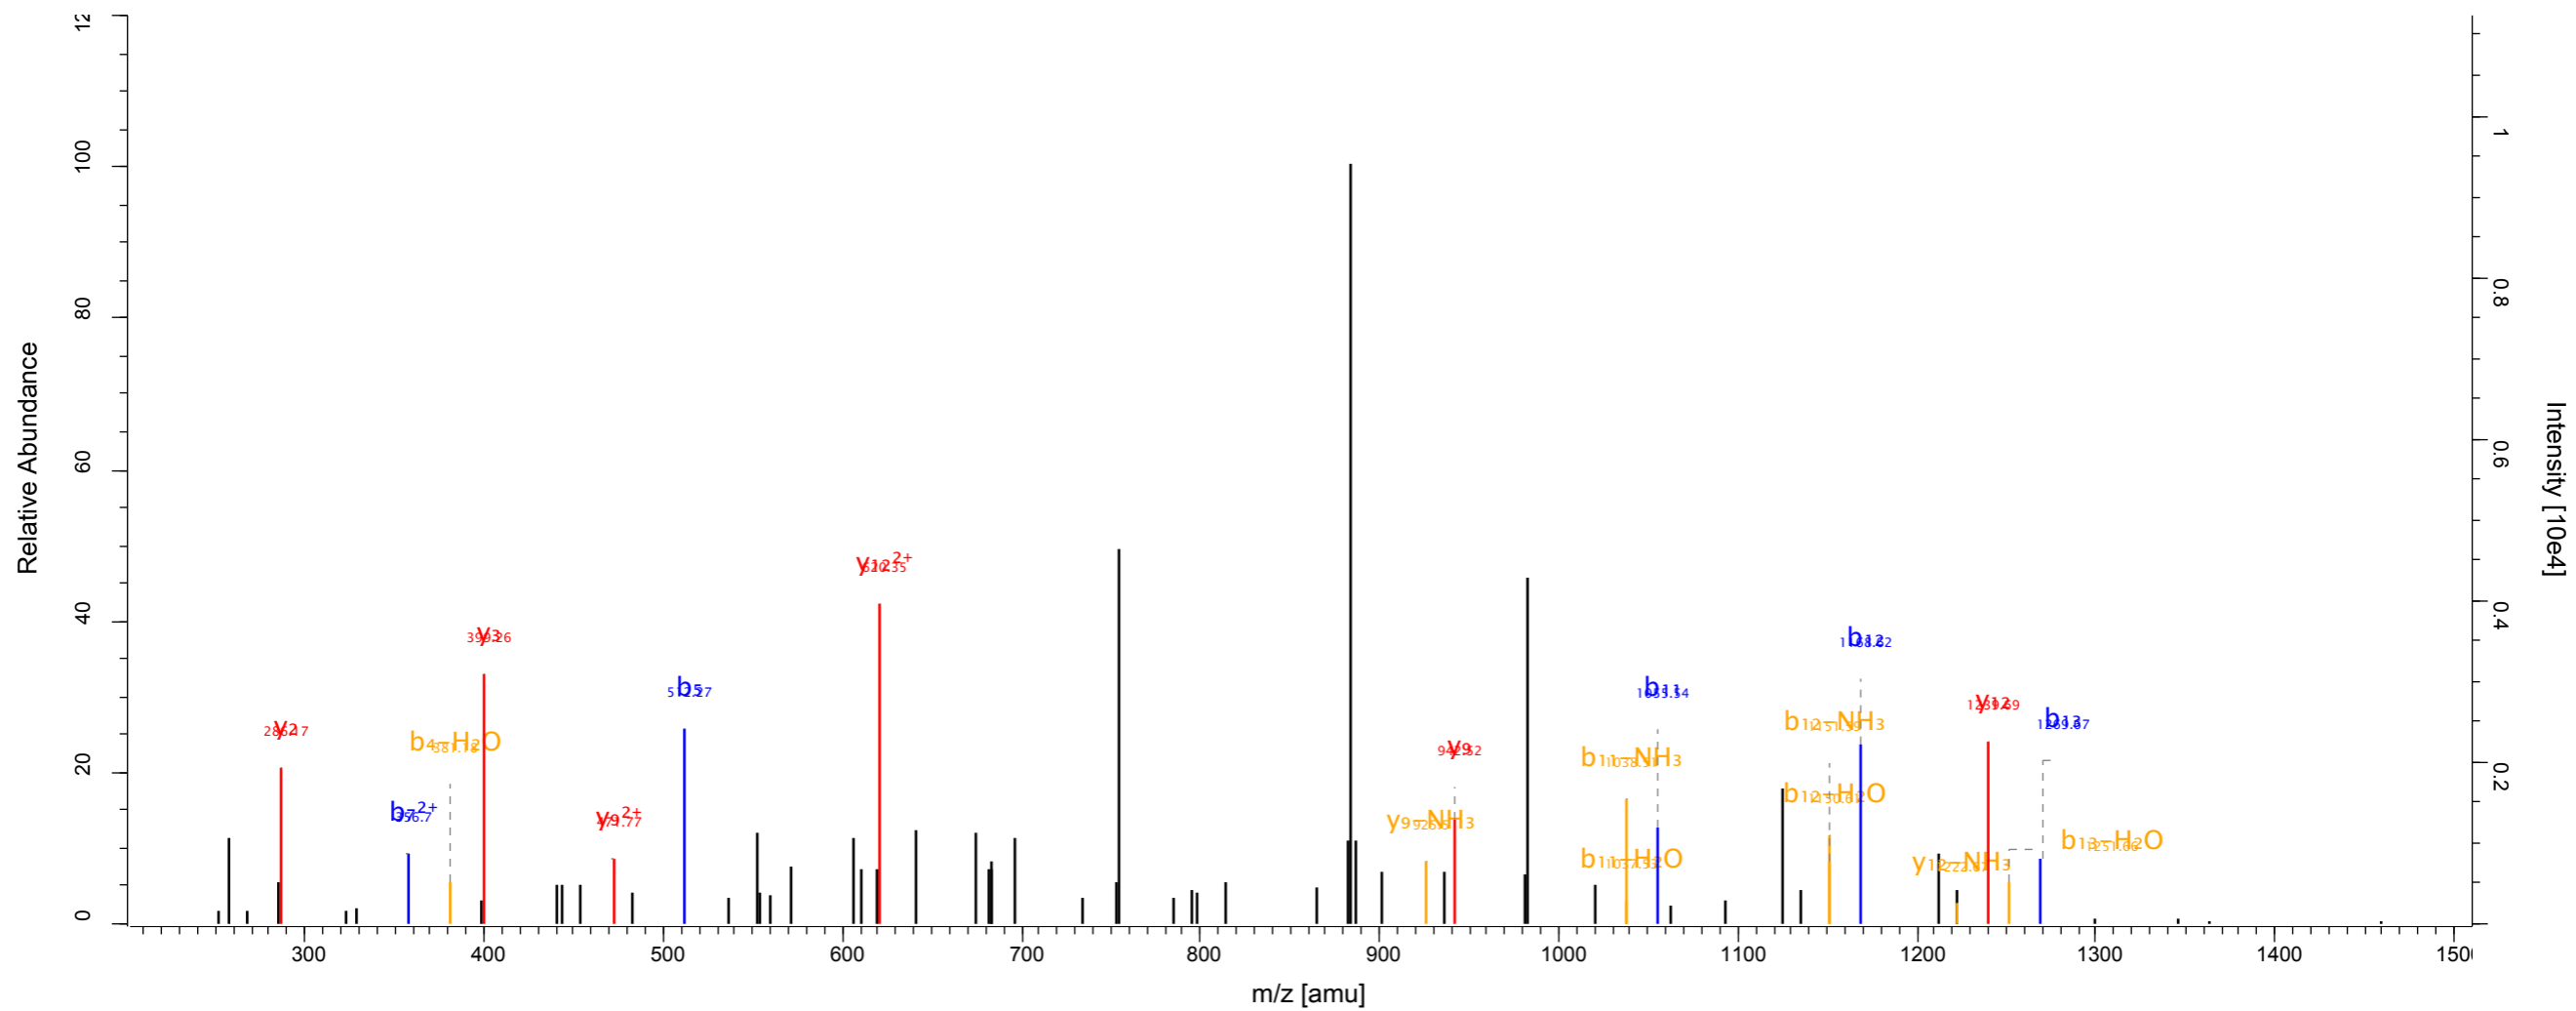

precursor information

|                   |                  |
|-------------------|------------------|
| Mass:             | 1442.77287       |
| m/z:              | 722.20271        |
| Charge:           | 2+               |
| Potentiation:     | 50.8010865782601 |
| Score:            | 105.640          |
| Mass Error [ppm]: | -0.026508        |
| PEP:              | 0.00014425       |
| Precursor Type:   | MULTI            |

general information

|                       |           |
|-----------------------|-----------|
| Annotation:           | 8 of 14   |
| AminoAcids Coverage:  | 57%       |
| Intensity Coverage:   | 27%       |
| Peak Coverage:        | 27%       |
| Protein Localisation: | 58 ... 71 |

| b <sup>2+</sup> ion |              | b ion      |              |    |     |    | y ion        |            | y <sup>2+</sup> ion |            |
|---------------------|--------------|------------|--------------|----|-----|----|--------------|------------|---------------------|------------|
| Δ dalton            | mass         | Δ dalton   | mass         |    | seq |    | Δ dalton     | mass       | Δ dalton            | mass       |
|                     | 100.07569038 |            | 100.07569038 | 1  | V   | 13 |              |            |                     |            |
|                     | 215.10263341 |            | 215.10263341 | 2  | D   | 12 | 1354.7200383 |            | 1354.7200383        |            |
|                     | 302.13466182 |            | 302.13466182 | 3  | S   | 11 | 1239.6930953 | -0.0278121 | 620.35018588        | +0.1376071 |
|                     | 399.18742568 |            | 399.18742568 | 4  | P   | 10 | 1152.6610669 |            | 1152.6610669        |            |
|                     | 512.27148966 | -0.0212455 | 512.27148966 | 5  | I   | 9  | 1055.608303  |            | 1055.608303         |            |
|                     | 599.30351807 |            | 599.30351807 | 6  | S   | 8  | 942.52423906 | -0.0896687 | 471.76575776        | +0.4493912 |
| +0.4585156          | 356.69742926 |            | 712.38758205 | 7  | I   | 7  | 855.49221065 |            | 855.49221065        |            |
|                     | 783.42469584 |            | 783.42469584 | 8  | A   | 6  | 742.40814667 |            | 742.40814667        |            |
|                     | 840.44615956 |            | 840.44615956 | 9  | G   | 5  | 671.37103288 |            | 671.37103288        |            |
|                     | 927.47818797 |            | 927.47818797 | 10 | S   | 4  | 614.34956916 |            | 614.34956916        |            |
|                     | 1055.5367655 | -0.0746073 | 1055.5367655 | 11 | Q   | 3  | 527.31754075 |            | 527.31754075        |            |
|                     | 1168.6208295 | -0.1327924 | 1168.6208295 | 12 | I   | 2  | 399.25896324 | -0.0099398 | 399.25896324        |            |
|                     | 1269.6685079 | -0.2282003 | 1269.6685079 | 13 | T   | 1  | 286.17489925 | +0.1346711 | 286.17489925        |            |
|                     |              |            |              | 14 | R   | 0  | 185.12722078 |            | 185.12722078        |            |

Scan number 20276 Raw file 20091021\_Orbi6\_MaHe\_SA\_ADH\_exp3\_30h\_Gel16  
 Method ITMS; CID Genenames ZNF316

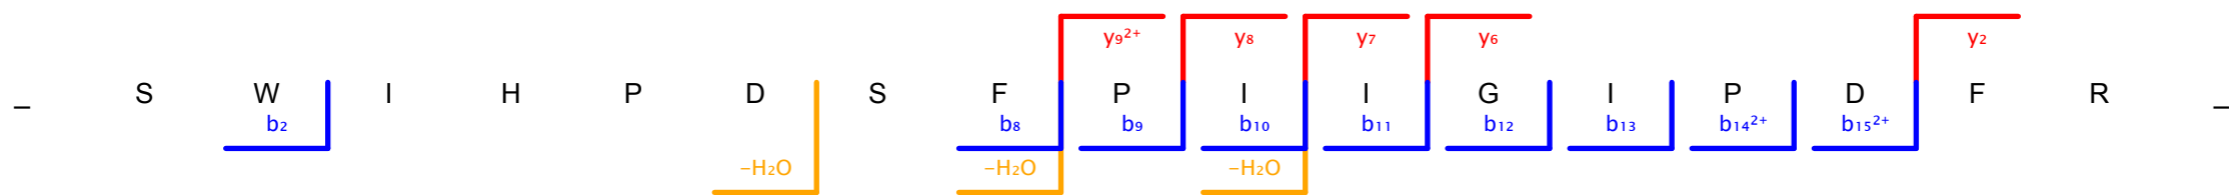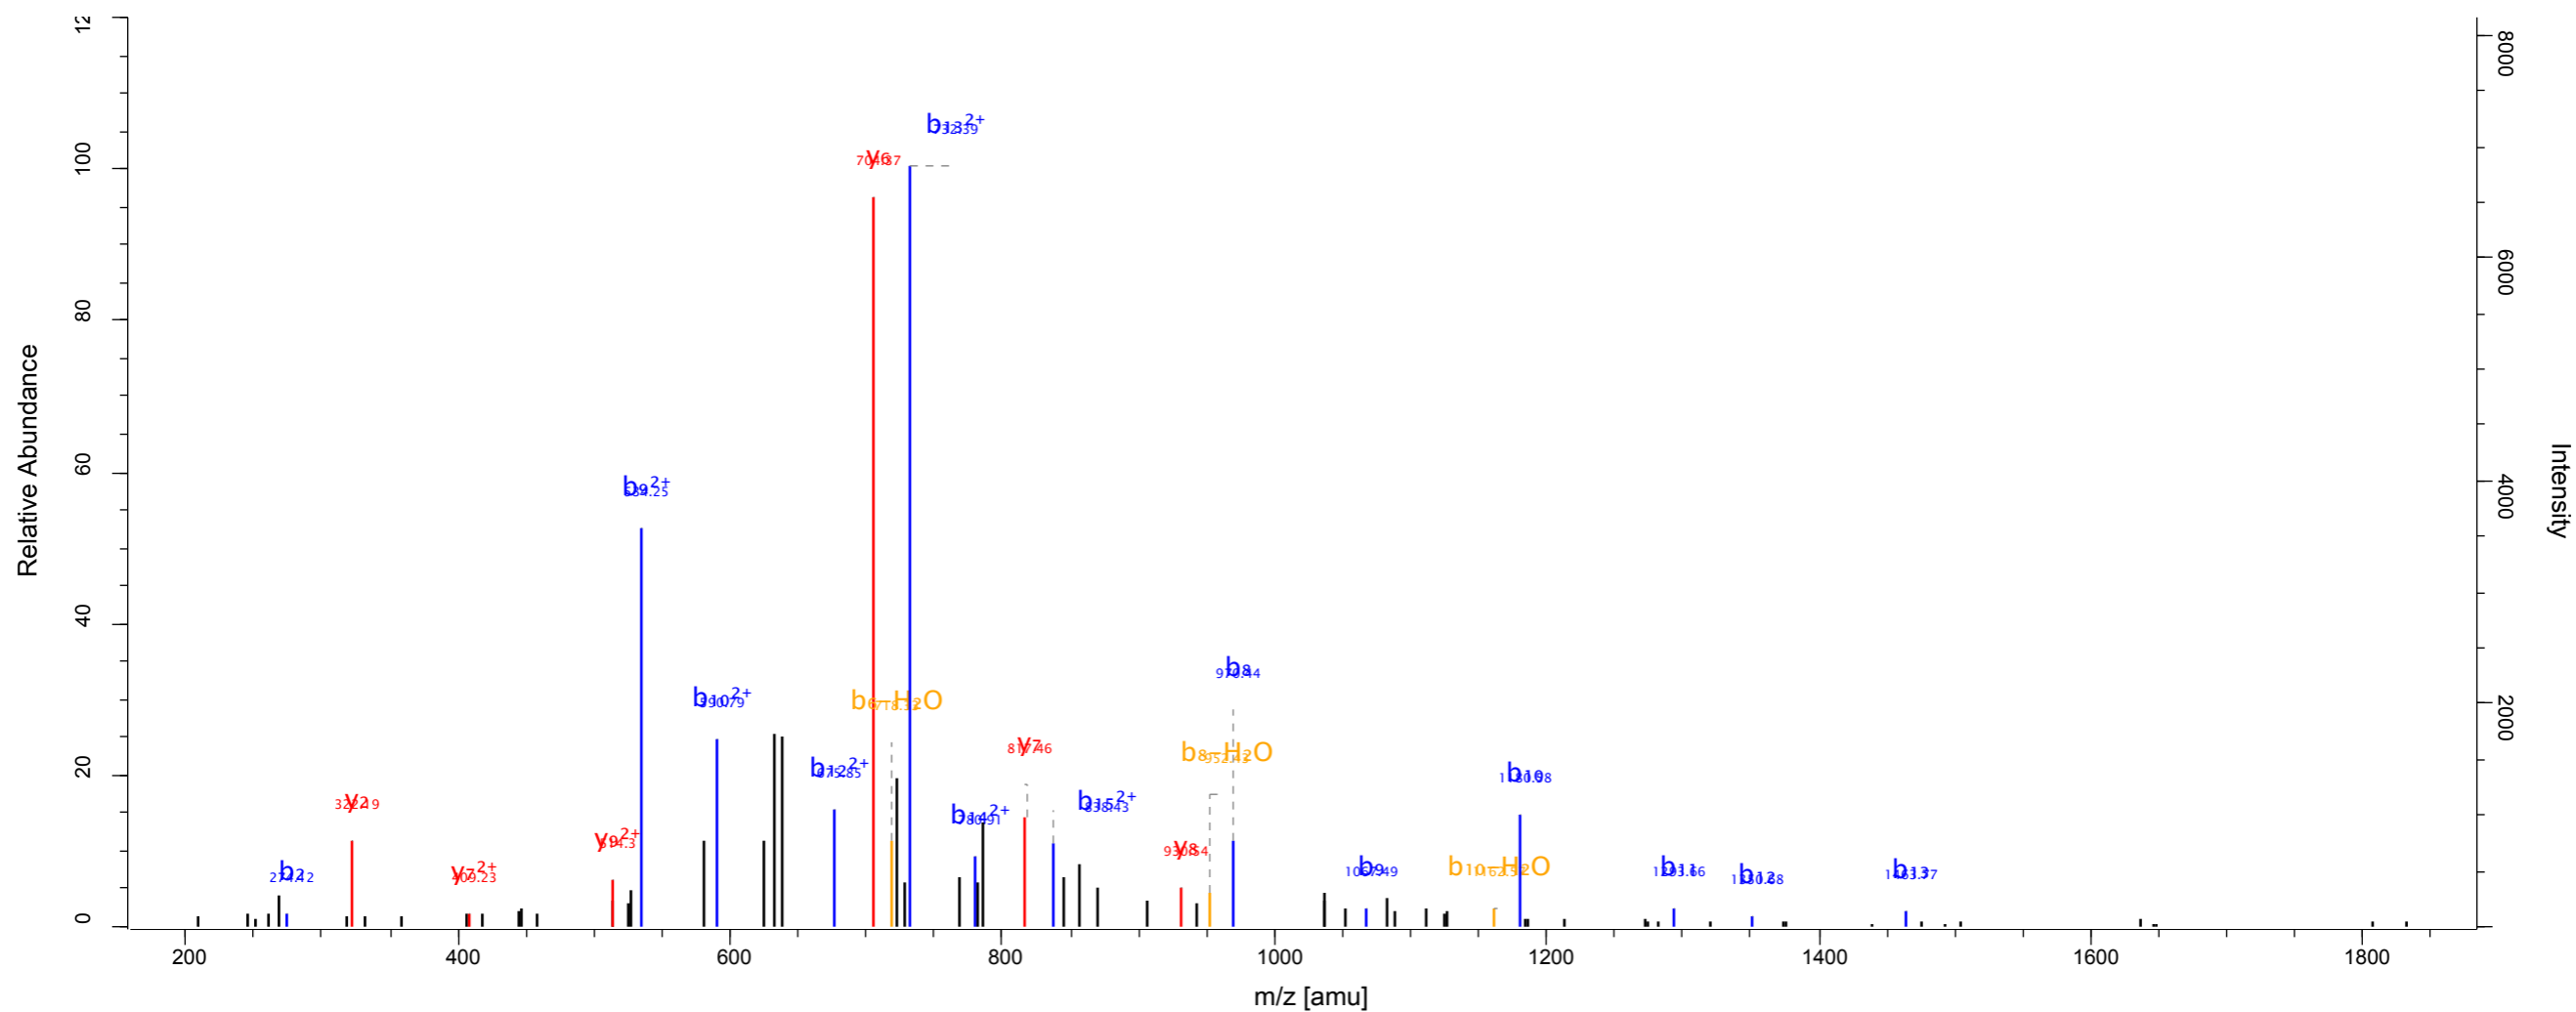

precursor information

|                   |                  |
|-------------------|------------------|
| Mass:             | 1006.0212        |
| m/z:              | 666.24771        |
| Charge:           | 2+               |
| Retention time:   | 115.604103088270 |
| Score:            | 121.7602         |
| Mass Error [ppm]: | 0.21082          |
| PEP:              | 1.2806505        |
| Precursor Type:   | MULTI            |

| b <sup>2+</sup> ion |              | b ion      |              |    |     |    | y ion        |            | y <sup>2+</sup> ion |            |
|---------------------|--------------|------------|--------------|----|-----|----|--------------|------------|---------------------|------------|
| Δ dalton            | mass         | Δ dalton   | mass         |    | seq |    | Δ dalton     | mass       | Δ dalton            | mass       |
|                     | 88.039304876 |            | 88.039304876 | 1  | S   | 16 |              |            |                     |            |
|                     | 274.11861783 | -0.1318625 | 274.11861783 | 2  | W   | 15 | 1909.9959305 |            | 1909.9959305        |            |
|                     | 387.20268181 |            | 387.20268181 | 3  | I   | 14 | 1723.9166176 |            | 1723.9166176        |            |
|                     | 524.26159367 |            | 524.26159367 | 4  | H   | 13 | 1610.8325536 |            | 1610.8325536        |            |
|                     | 621.31435752 |            | 621.31435752 | 5  | P   | 12 | 1473.7736417 |            | 1473.7736417        |            |
|                     | 736.34130056 |            | 736.34130056 | 6  | D   | 11 | 1376.7208779 |            | 1376.7208779        |            |
|                     | 823.37332897 |            | 823.37332897 | 7  | S   | 10 | 1261.6939348 |            | 1261.6939348        |            |
|                     | 970.44174288 | -0.0015573 | 970.44174288 | 8  | F   | 9  | 1174.6619064 |            | 1174.6619064        |            |
| -0.0306157          | 534.2508916  | -0.3785399 | 1067.4945067 | 9  | P   | 8  | 1027.5934925 |            | 514.30038448        | +0.0656433 |
| -0.0147864          | 590.79292359 | -0.0932192 | 1180.5785707 | 10 | I   | 7  | 930.54072865 | +0.2140931 | 930.54072865        |            |
|                     | 1293.6626347 | -0.083289  | 1293.6626347 | 11 | I   | 6  | 817.45666467 | -0.1513058 | 409.23197057        | -0.2648075 |
| -0.1268154          | 675.84568744 | +0.0252522 | 1350.6840984 | 12 | G   | 5  | 704.37260069 | -0.003277  | 704.37260069        |            |
| -0.0227902          | 732.38771943 | -0.2631575 | 1463.7681624 | 13 | I   | 4  | 647.35113696 |            | 647.35113696        |            |
| -0.2511985          | 780.91410136 |            | 1560.8209263 | 14 | P   | 3  | 534.26707298 |            | 534.26707298        |            |
| -0.2444674          | 838.42757288 |            | 1675.8478693 | 15 | D   | 2  | 437.21430913 |            | 437.21430913        |            |
|                     | 1822.9162832 |            | 1822.9162832 | 16 | F   | 1  | 322.1873661  | +0.0078243 | 322.1873661         |            |
|                     |              |            |              | 17 | R   | 0  | 175.11895218 |            | 175.11895218        |            |

general information

|                       |             |
|-----------------------|-------------|
| Annotation:           | 11 of 17    |
| AminoAcids Coverage:  | 65 %        |
| Intensity Coverage:   | 65 %        |
| Peak Coverage:        | 28 %        |
| Protein Localisation: | 606 ... 622 |

Scan number 12337 Raw file 20091023\_Orbi6\_MaHe\_SA\_ADH\_exp3\_GFR\_Gel03  
 Method ITMS; CID Genenames GFER

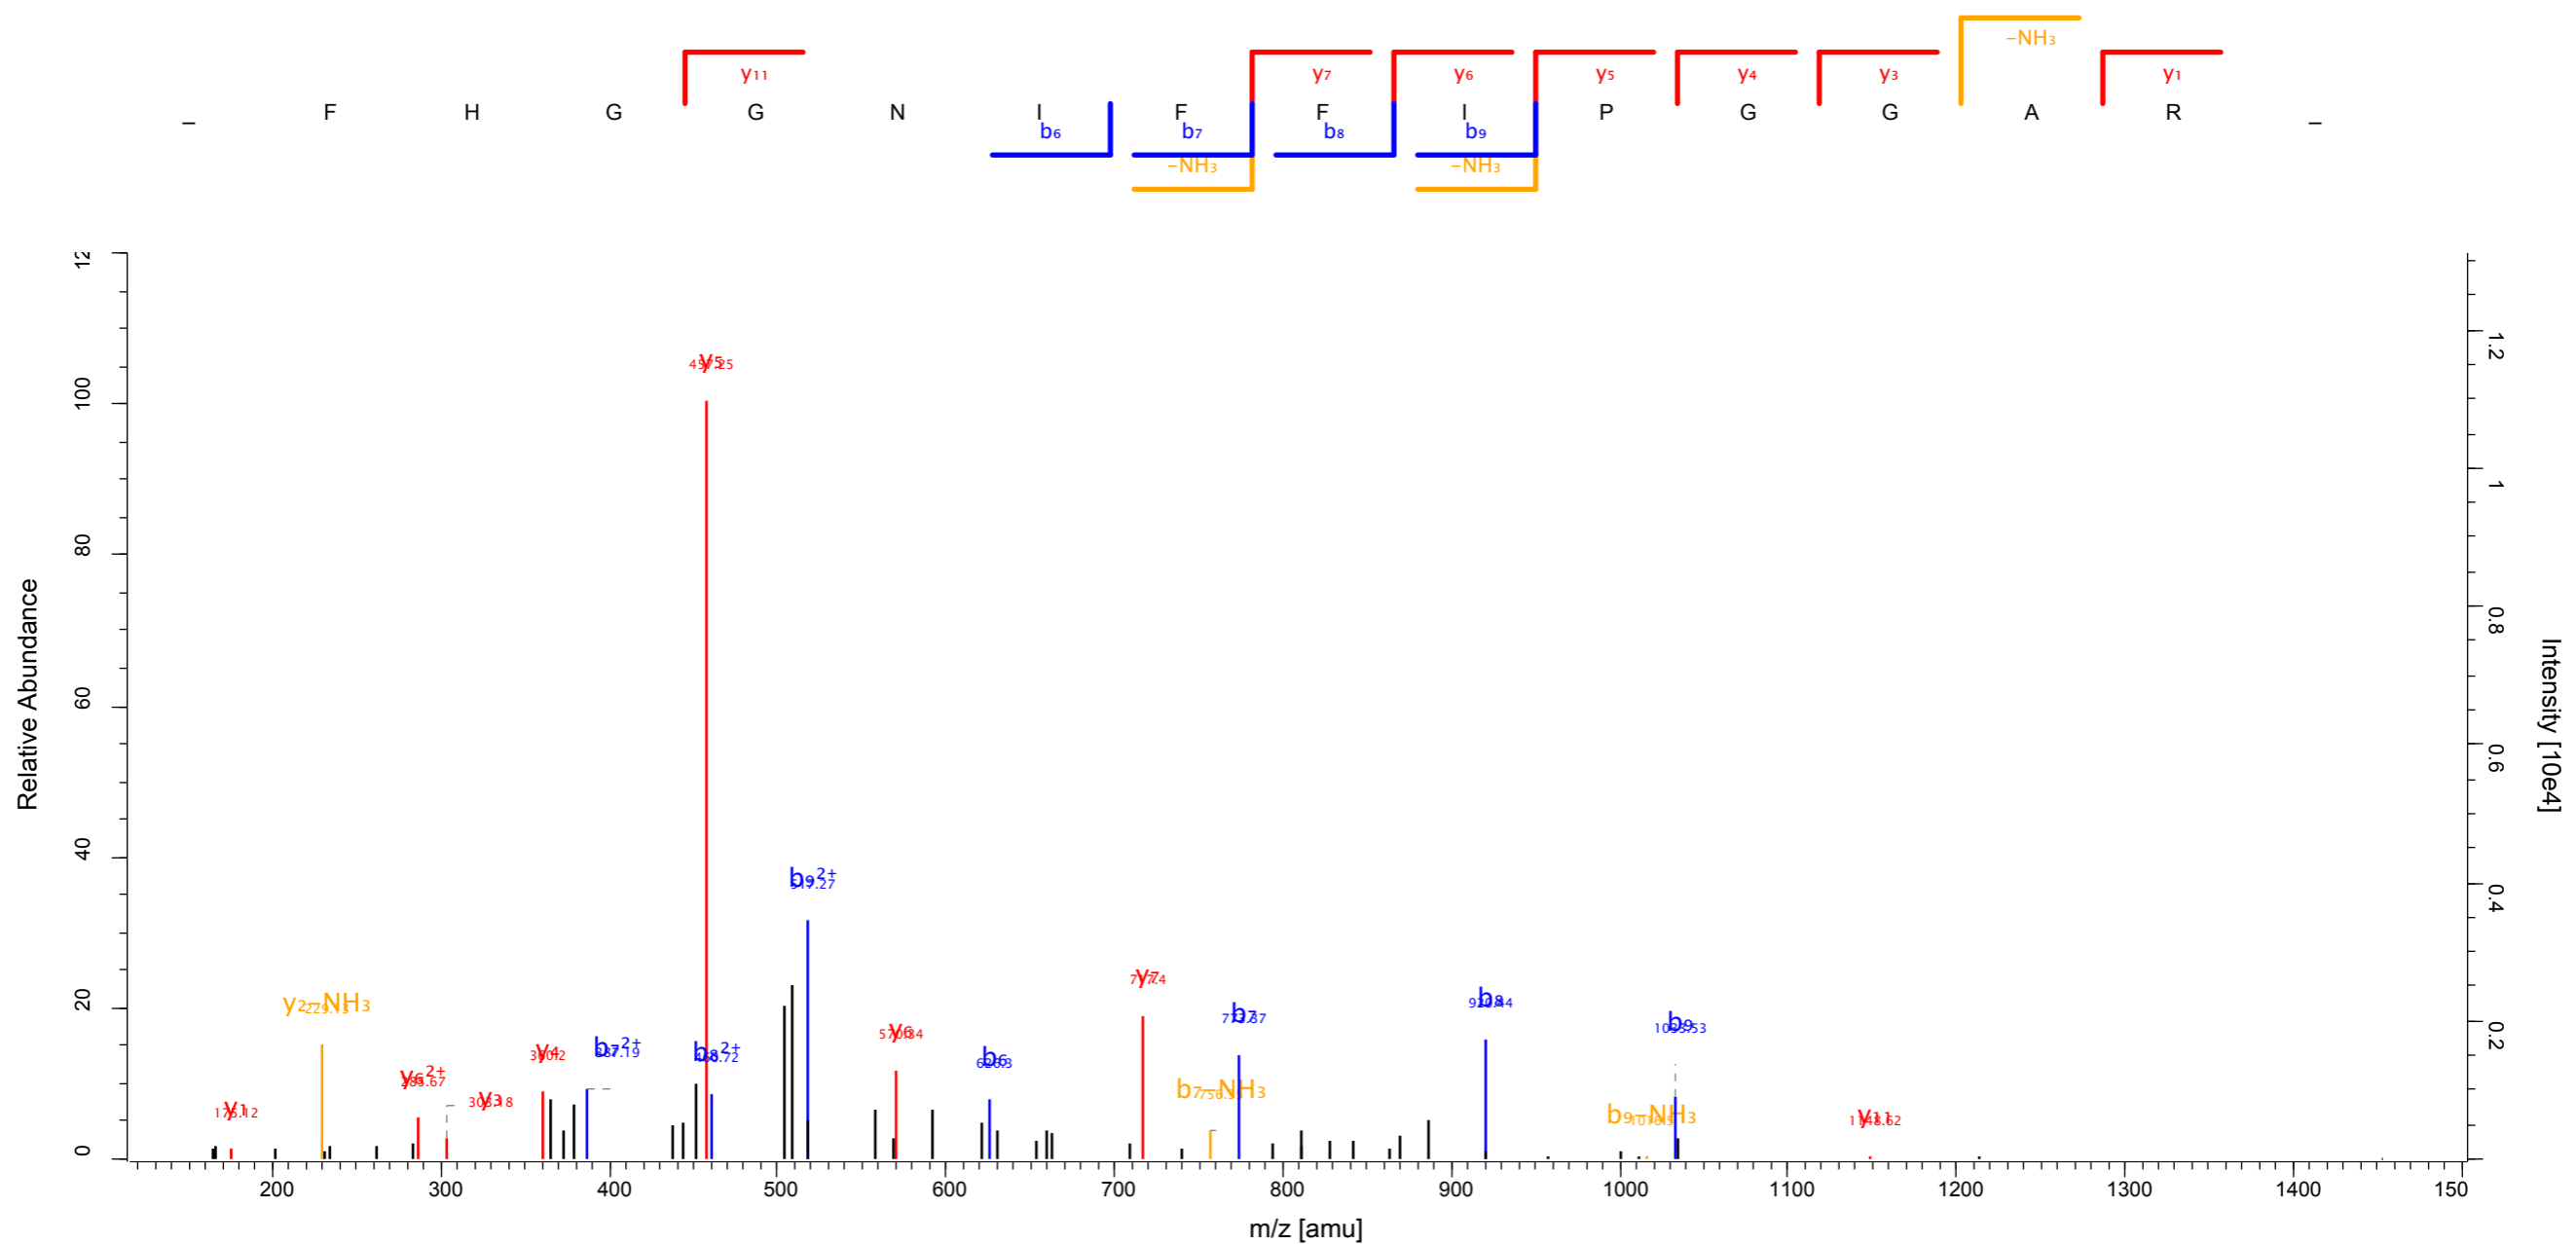

precursor information

|                   |                  |
|-------------------|------------------|
| Mass:             | 1488.76258       |
| m/z:              | 407.26147        |
| Charge:           | 2+               |
| Potentialtime:    | 75.4160823274022 |
| Score:            | 105.1704         |
| Mass Error [ppm]: | -0.021010        |
| PEP:              | 0.00016127       |
| Precursor Type:   | MULTI            |

general information

|                       |           |
|-----------------------|-----------|
| Annotation:           | 10 of 14  |
| AminoAcids Coverage:  | 71 %      |
| Intensity Coverage:   | 62 %      |
| Peak Coverage:        | 21 %      |
| Protein Localisation: | 10 ... 23 |

| b <sup>2+</sup> ion |              | b ion      |              |    |     |    | y ion        |            | y <sup>2+</sup> ion |           |
|---------------------|--------------|------------|--------------|----|-----|----|--------------|------------|---------------------|-----------|
| Δ dalton            | mass         | Δ dalton   | mass         |    | seq |    | Δ dalton     | mass       | Δ dalton            | mass      |
|                     | 148.07569038 |            | 148.07569038 | 1  | F   | 13 |              |            |                     |           |
|                     | 285.13460225 |            | 285.13460225 | 2  | H   | 12 | 1342.7014798 |            | 1342.7014798        |           |
|                     | 342.15606597 |            | 342.15606597 | 3  | G   | 11 | 1205.642568  |            | 1205.642568         |           |
|                     | 399.17752969 |            | 399.17752969 | 4  | G   | 10 | 1148.6211042 | -0.1261091 | 1148.6211042        |           |
|                     | 513.22045714 |            | 513.22045714 | 5  | N   | 9  | 1091.5996405 |            | 1091.5996405        |           |
|                     | 626.30452112 | +0.1432328 | 626.30452112 | 6  | I   | 8  | 977.55671306 |            | 977.55671306        |           |
| +0.0639531          | 387.19010575 | +0.0537007 | 773.37293504 | 7  | F   | 7  | 864.47264908 |            | 864.47264908        |           |
| +0.0396338          | 460.72431271 | -0.1210975 | 920.44134895 | 8  | F   | 6  | 717.40423516 | -0.049804  | 717.40423516        |           |
| -0.0729243          | 517.2663447  | +0.0259787 | 1033.5254129 | 9  | I   | 5  | 570.33582125 | -0.069708  | 285.67154886        | +0.017416 |
|                     | 1130.5781768 |            | 1130.5781768 | 10 | P   | 4  | 457.25175727 | +0.0113653 | 457.25175727        |           |
|                     | 1187.5996405 |            | 1187.5996405 | 11 | G   | 3  | 360.19899342 | +0.0991633 | 360.19899342        |           |
|                     | 1244.6211042 |            | 1244.6211042 | 12 | G   | 2  | 303.17752969 | -0.0384916 | 303.17752969        |           |
|                     | 1315.658218  |            | 1315.658218  | 13 | A   | 1  | 246.15606597 |            | 246.15606597        |           |
|                     |              |            |              | 14 | R   | 0  | 175.11895218 | +0.1438652 | 175.11895218        |           |

Scan number 13337 Raw file 20091023\_Orbi6\_MaHe\_SA\_ADH\_exp3\_GFR\_Gel03  
 Method ITMS; CID Genenames LY96

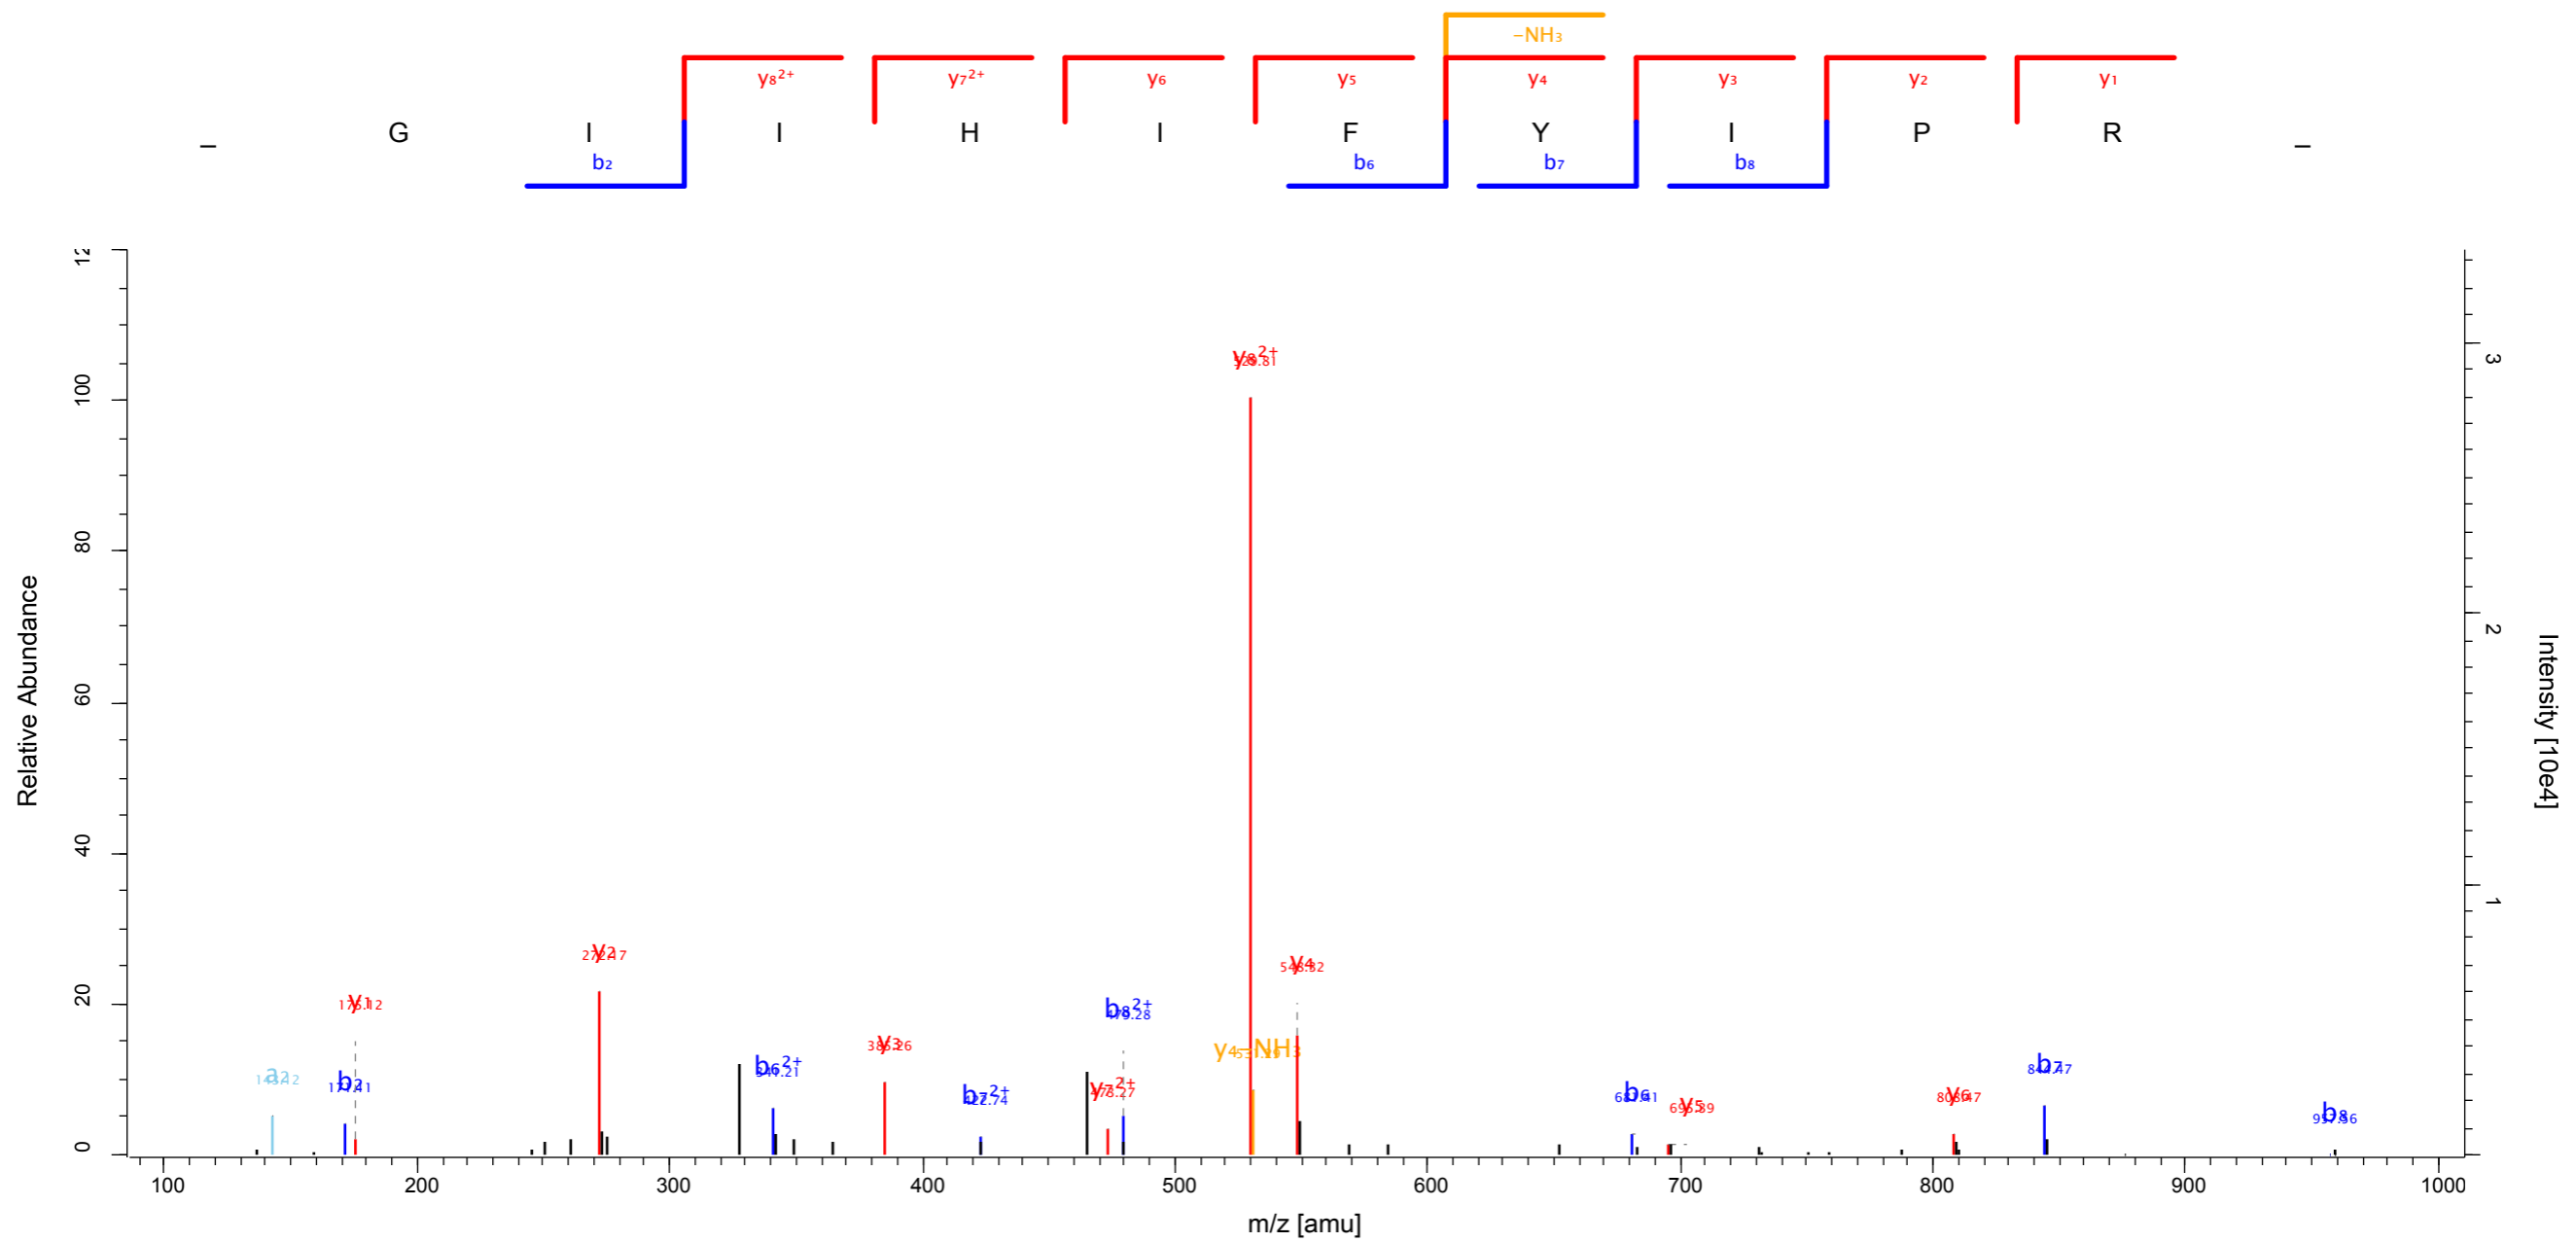

precursor information

|                       |                  |
|-----------------------|------------------|
| Mass:                 | 1227.7127        |
| m/z:                  | 410.24484        |
| Charge:               | 2+               |
| Retention time:       | 80.7084237670808 |
| Score:                | 173.2345         |
| Mass Error (ppm):     | -0.00303         |
| DEP:                  | 1.7526E-06       |
| 96 Precursor Type:    | MULTI            |
| Annotation:           | 0 of 10          |
| AminoAcids Coverage:  | 90 %             |
| Intensity Coverage:   | 76 %             |
| Peak Coverage:        | 35 %             |
| Protein Localisation: | 59 ... 68        |

| a ion      |            | b <sup>2+</sup> ion |            | b ion      |            |    |     |   | y ion      |            | y <sup>2+</sup> ion |            |
|------------|------------|---------------------|------------|------------|------------|----|-----|---|------------|------------|---------------------|------------|
| Δ dalton   | mass       | Δ dalton            | mass       | Δ dalton   | mass       |    | seq |   | Δ dalton   | mass       | Δ dalton            | mass       |
|            | 30.0338256 |                     | 58.0287402 |            | 58.0287402 | 1  | G   | 9 |            |            |                     |            |
| +0.0081786 | 143.11789  |                     | 171.112804 | -0.1224935 | 171.112804 | 2  | I   | 8 | 1171.69863 |            | 1171.69863          |            |
|            | 256.201954 |                     | 284.196868 |            | 284.196868 | 3  | I   | 7 | 1058.61456 |            | 529.810919          | +0.1738829 |
|            | 393.260865 |                     | 421.25578  |            | 421.25578  | 4  | H   | 6 | 945.530498 |            | 473.268887          | +0.0619537 |
|            | 506.344929 |                     | 534.339844 |            | 534.339844 | 5  | I   | 5 | 808.471586 | +0.0950029 | 808.471586          |            |
|            | 653.413343 | -0.0358617          | 341.207767 | -0.1047911 | 681.408258 | 6  | F   | 4 | 695.387522 | +0.0396626 | 695.387522          |            |
|            | 816.476672 | -0.056265           | 422.739431 | -0.0279829 | 844.471586 | 7  | Y   | 3 | 548.319109 | -0.0619064 | 548.319109          |            |
|            | 929.560736 | -0.1347044          | 479.281463 | -0.1630723 | 957.55565  | 8  | I   | 2 | 385.25578  | +0.0550415 | 385.25578           |            |
|            | 1026.6135  |                     | 1054.60841 |            | 1054.60841 | 9  | P   | 1 | 272.171716 | +0.0359256 | 272.171716          |            |
|            |            |                     |            |            |            | 10 | R   | 0 | 175.118952 | +0.0583244 | 175.118952          |            |

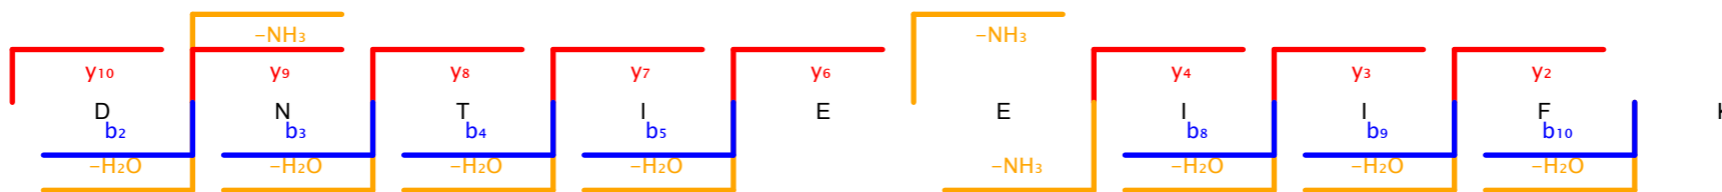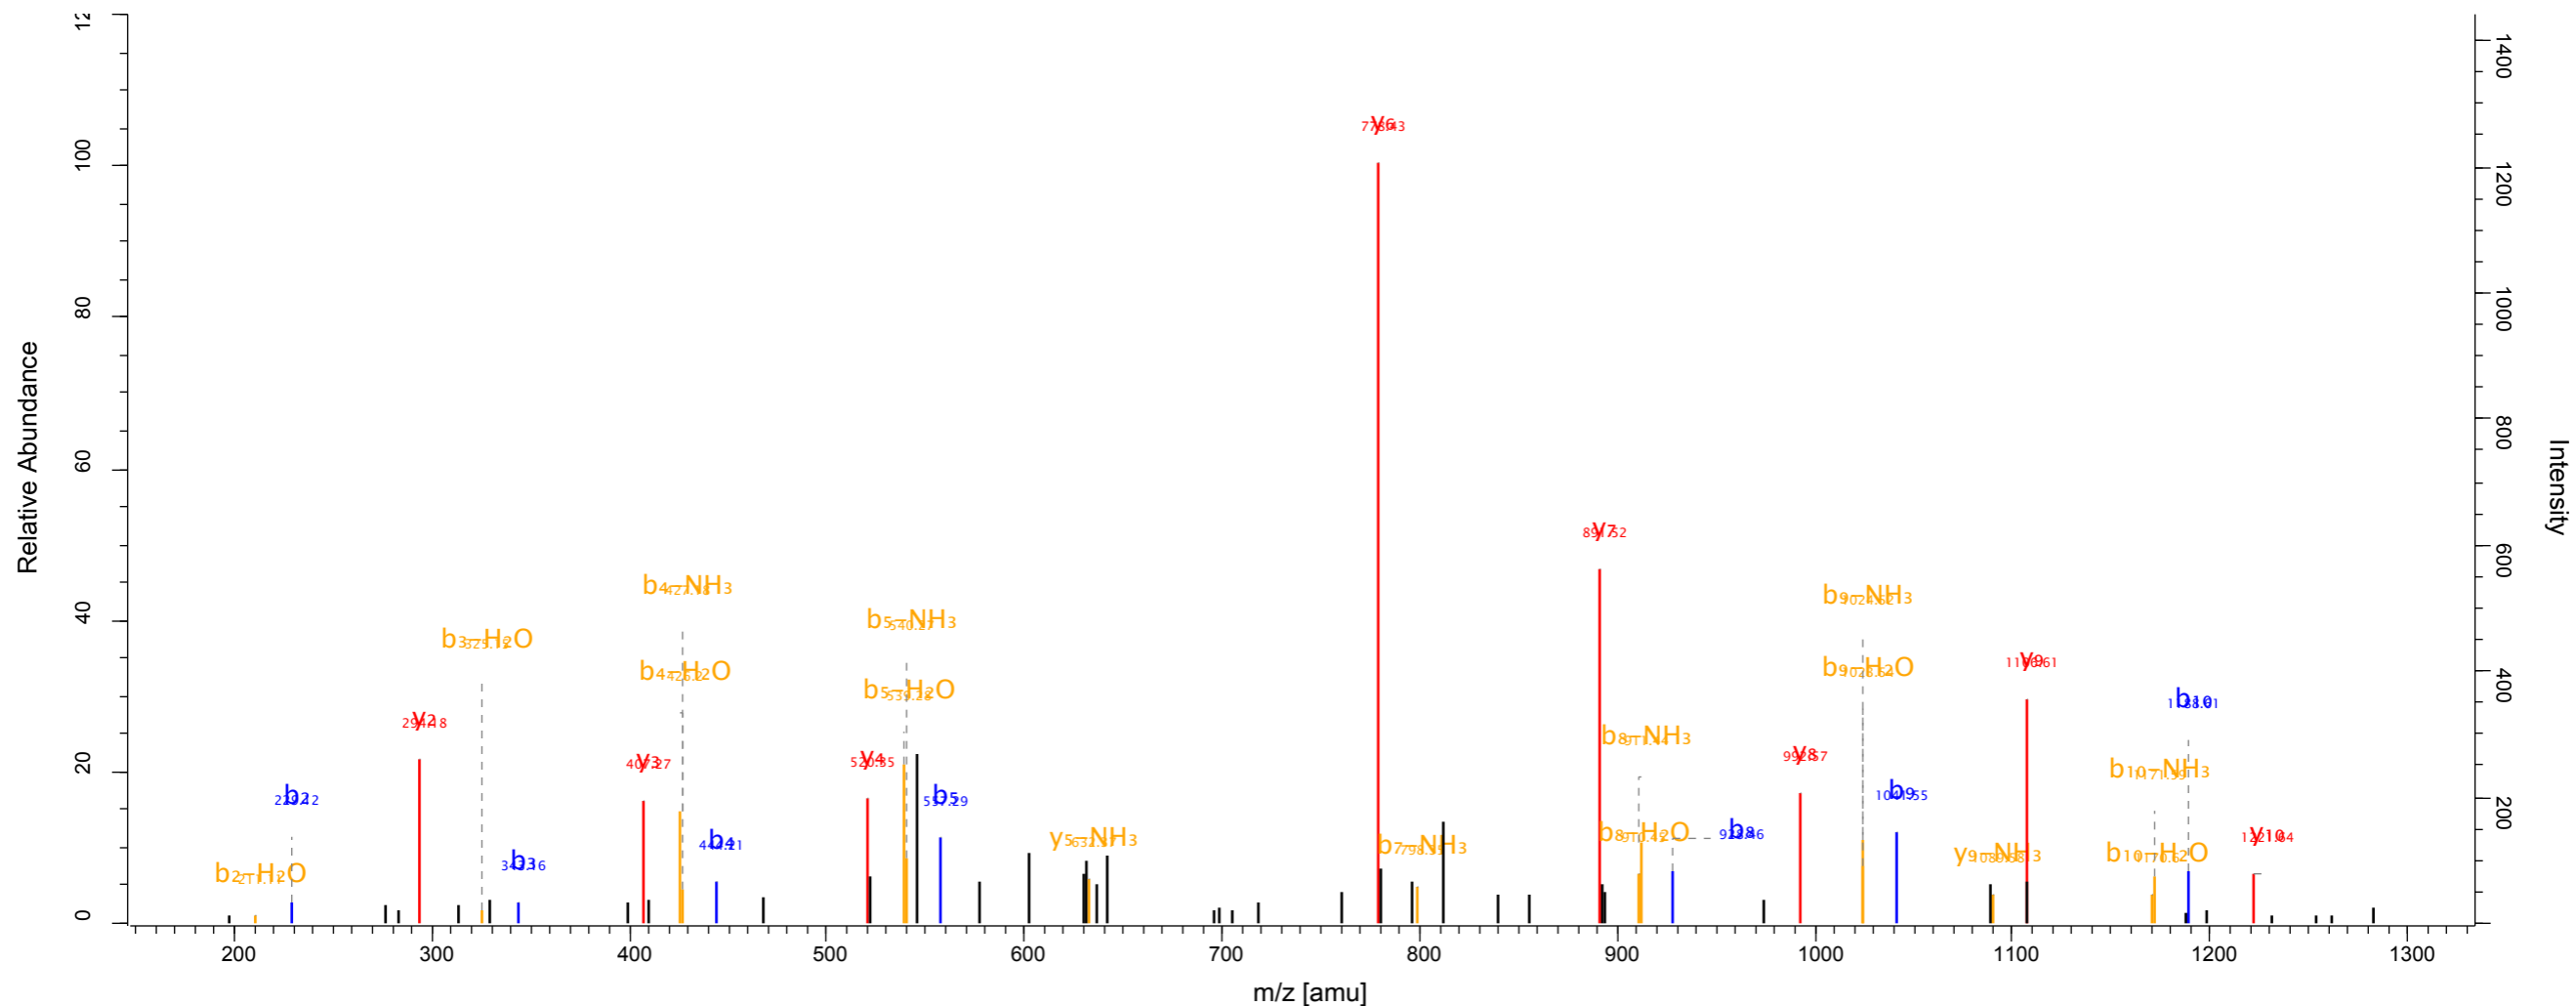

precursor information

|                   |                  |
|-------------------|------------------|
| Mass:             | 1222.7124        |
| m/z:              | 667.86208        |
| Charge:           | 2+               |
| Retention time:   | 100.201524123228 |
| Score:            | 212.8151         |
| Mass Error (ppm): | 0.35286          |
| PEP:              | 6.6221E-27       |
| Precursor Type:   | MULTI            |

general information

|                       |           |
|-----------------------|-----------|
| Annotation:           | 9 of 11   |
| AminoAcids Coverage:  | 82 %      |
| Intensity Coverage:   | 71 %      |
| Peak Coverage:        | 15 %      |
| Protein Localisation: | 71 ... 81 |

| b ion      |                |     |   | y ion    |                |  |            |
|------------|----------------|-----|---|----------|----------------|--|------------|
| Δ dalton   | mass           | seq |   | Δ dalton | mass           |  |            |
|            | 114.091340447  | 1   | I | 10       |                |  |            |
| -0.0300572 | 229.118283479  | 2   | D | 9        | 1221.636145174 |  | -0.0261598 |
| +0.1991406 | 343.161210926  | 3   | N | 8        | 1106.609202142 |  | +0.0198262 |
| -0.0812649 | 444.2088894    | 4   | T | 7        | 992.566274694  |  | -0.1168728 |
| -0.0486297 | 557.292953381  | 5   | I | 6        | 891.51859622   |  | -0.0853076 |
|            | 686.335546477  | 6   | E | 5        | 778.43453224   |  | -0.0995103 |
|            | 815.378139573  | 7   | E | 4        | 649.391939144  |  |            |
| -0.277206  | 928.462203554  | 8   | I | 3        | 520.349346048  |  | -0.1207694 |
| -0.232913  | 1041.546267534 | 9   | I | 2        | 407.265282067  |  | -0.0711292 |
| -0.1958582 | 1188.61468145  | 10  | F | 1        | 294.181218087  |  | -0.0946092 |
|            |                | 11  | K | 0        | 147.112804171  |  |            |



Scan number 13740 Raw file 20091023\_Orbi6\_MaHe\_SA\_ADH\_exp3\_GFR\_Gel05  
 Method ITMS; CID Genenames MAPK1IP1L

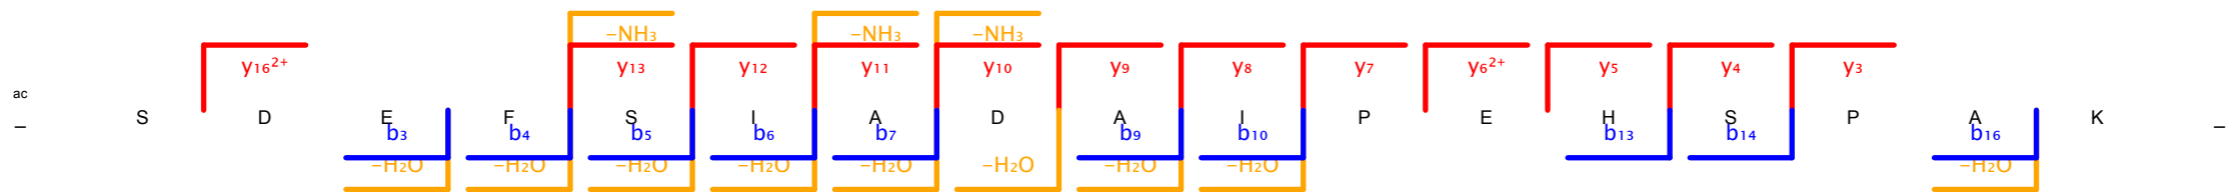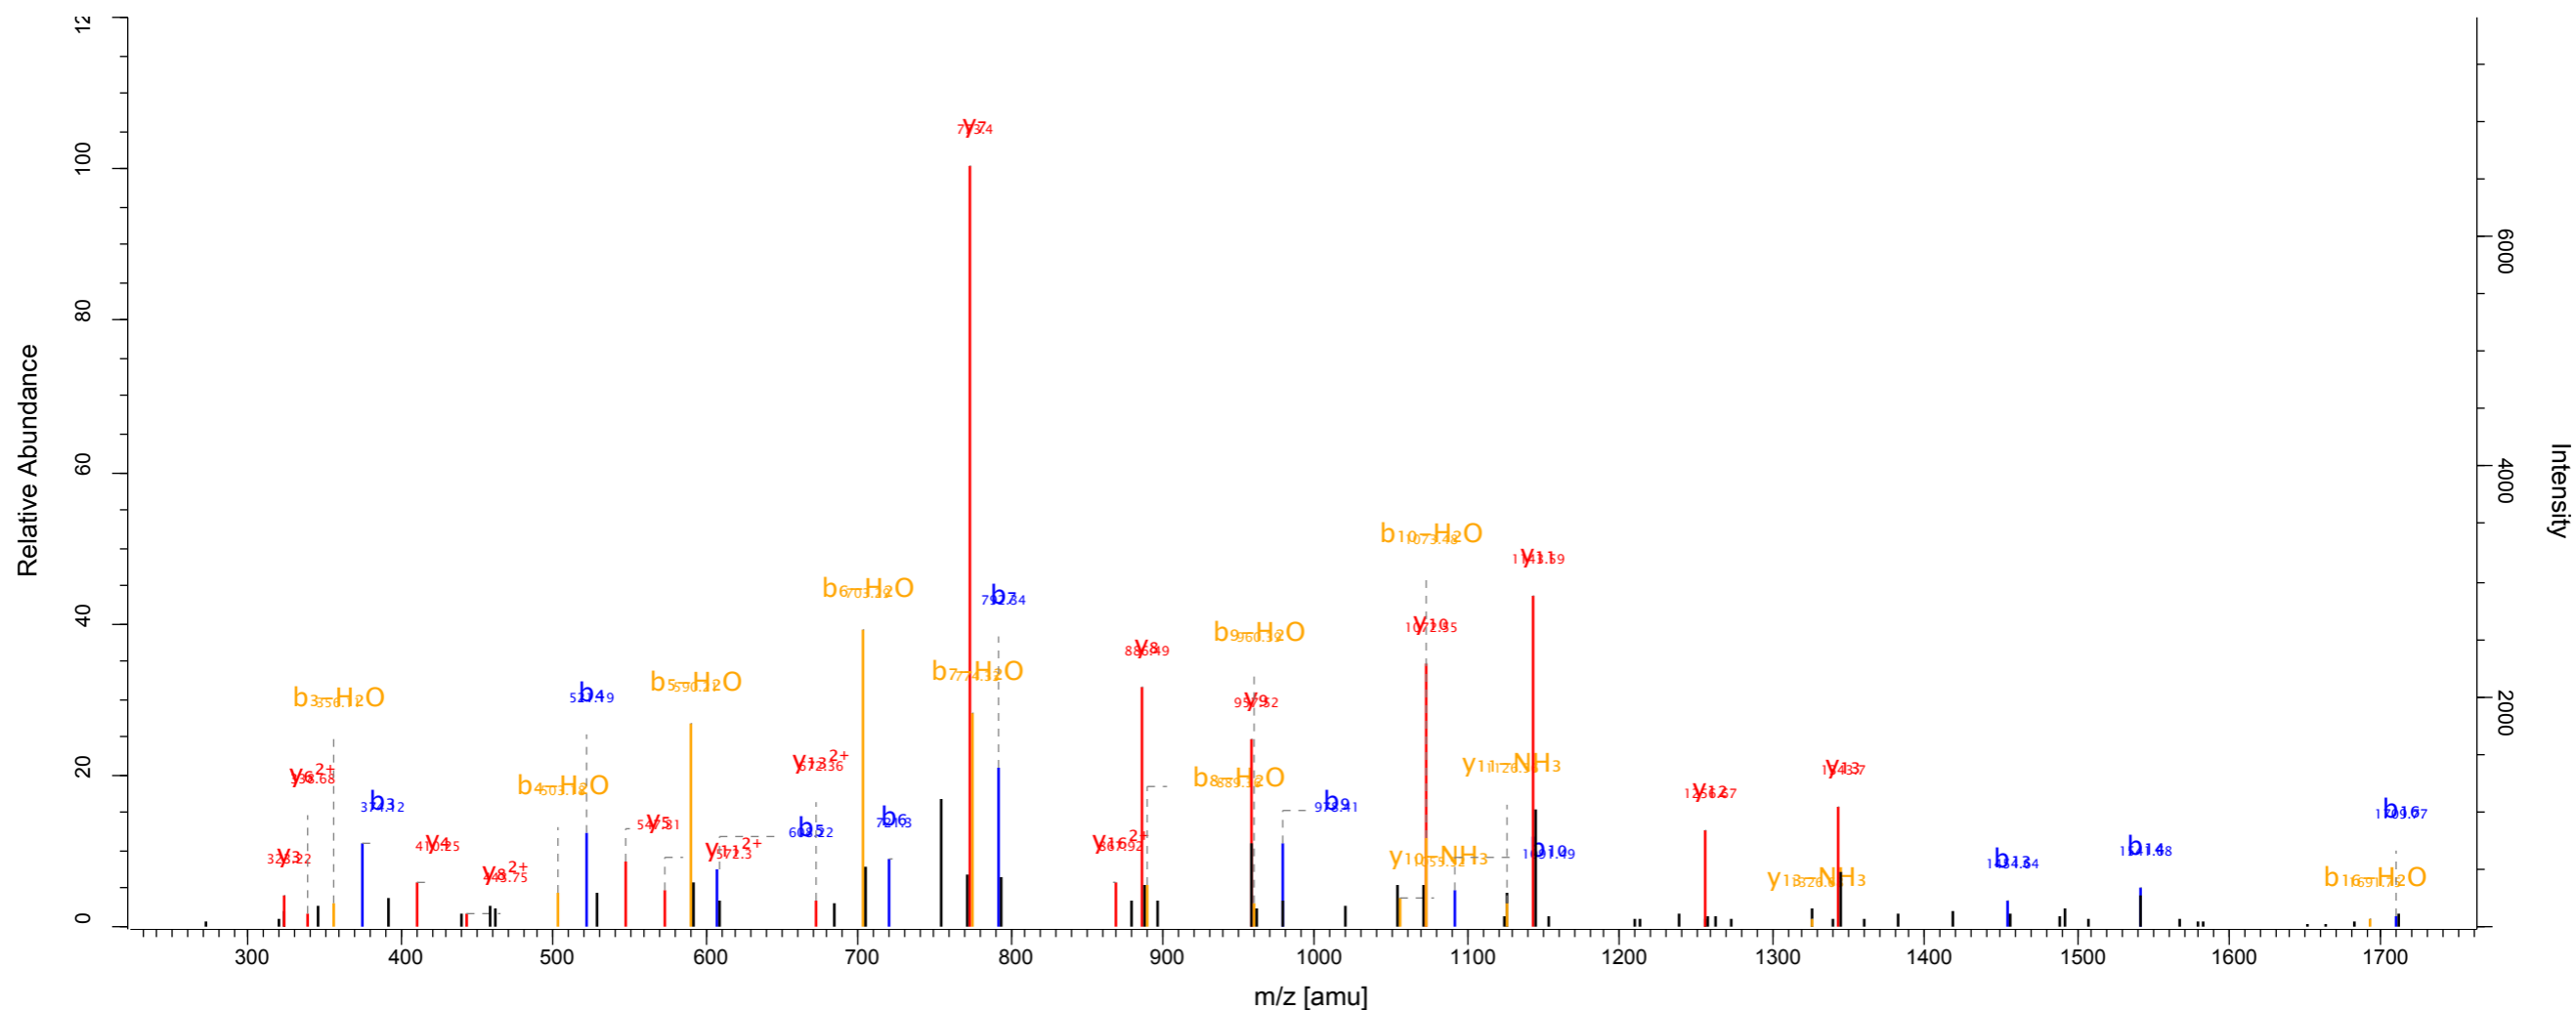

precursor information

|                   |                  |
|-------------------|------------------|
| Mass:             | 1854.8642        |
| m/z:              | 1028.42028       |
| Charge:           | 2+               |
| Retention time:   | 82.1560442740022 |
| Score:            | 227.4787         |
| Mass Error [ppm]: | 0.22620          |
| DEP:              | 4.1222562        |
| Precursor Type:   | MULTI            |

| b ion      |                |    |     |    | y ion          |            | y <sup>2+</sup> ion |            |
|------------|----------------|----|-----|----|----------------|------------|---------------------|------------|
| Δ dalton   | mass           |    | seq |    | Δ dalton       | mass       | Δ dalton            | mass       |
|            | 130.049869563  | 1  | S   | 16 |                |            |                     |            |
|            | 245.076812595  | 2  | D   | 15 | 1734.842454867 |            | 867.924865667       | +0.4008179 |
| -0.1744289 | 374.119405691  | 3  | E   | 14 | 1619.815511835 |            | 1619.815511835      |            |
| -0.0741111 | 521.187819607  | 4  | F   | 13 | 1490.772918739 |            | 1490.772918739      |            |
| -0.0778192 | 608.219848017  | 5  | S   | 12 | 1343.704504822 | -0.1261357 | 672.355890644       | +0.0408989 |
| -0.3549984 | 721.303911998  | 6  | I   | 11 | 1256.672476413 | +0.0337003 | 1256.672476413      |            |
| -0.2171855 | 792.341025785  | 7  | A   | 10 | 1143.588412432 | -0.1160003 | 572.297844449       | +0.0112376 |
|            | 907.367968817  | 8  | D   | 9  | 1072.551298644 | +0.0556349 | 1072.551298644      |            |
| -0.3453292 | 978.405082605  | 9  | A   | 8  | 957.524355612  | -0.0512721 | 957.524355612       |            |
| -0.2804064 | 1091.489146585 | 10 | I   | 7  | 886.487241824  | -0.0635968 | 443.747259146       | -0.4266415 |
|            | 1188.541910437 | 11 | P   | 6  | 773.403177844  | +0.0153402 | 773.403177844       |            |
|            | 1317.584503534 | 12 | E   | 5  | 676.350413992  |            | 338.678845229       | -0.3468445 |
| -0.2513256 | 1454.643415396 | 13 | H   | 4  | 547.307820896  | +0.0441689 | 547.307820896       |            |
| -0.0926801 | 1541.675443806 | 14 | S   | 3  | 410.248909033  | +0.1217575 | 410.248909033       |            |
|            | 1638.728207658 | 15 | P   | 2  | 323.216880624  | +0.1274492 | 323.216880624       |            |
| +0.035826  | 1709.765321446 | 16 | A   | 1  | 226.164116772  |            | 226.164116772       |            |
|            |                | 17 | K   | 0  | 155.127002984  |            | 155.127002984       |            |

general information

|                       |          |
|-----------------------|----------|
| Annotation:           | 15 of 17 |
| AminoAcids Coverage:  | 88%      |
| Intensity Coverage:   | 74%      |
| Peak Coverage:        | 41%      |
| Protein Localisation: | 2 ... 18 |

Scan number 18511 Raw file 20091023\_Orbi6\_MaHe\_SA\_ADH\_exp3\_GFR\_Gel05  
 Method ITMS; CID Genenames TTC33

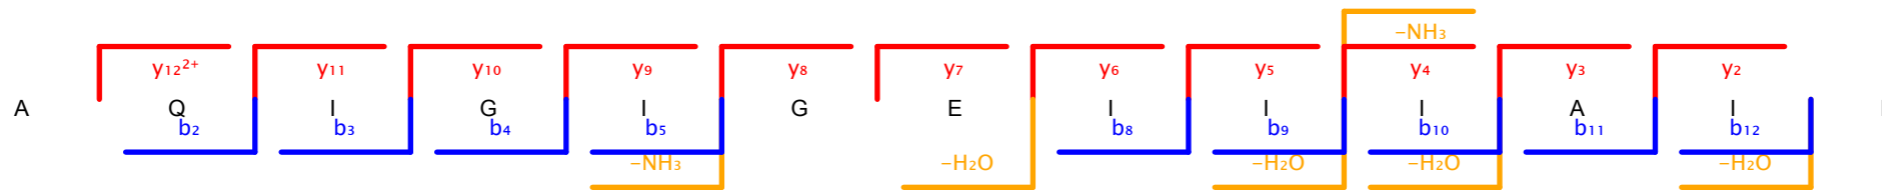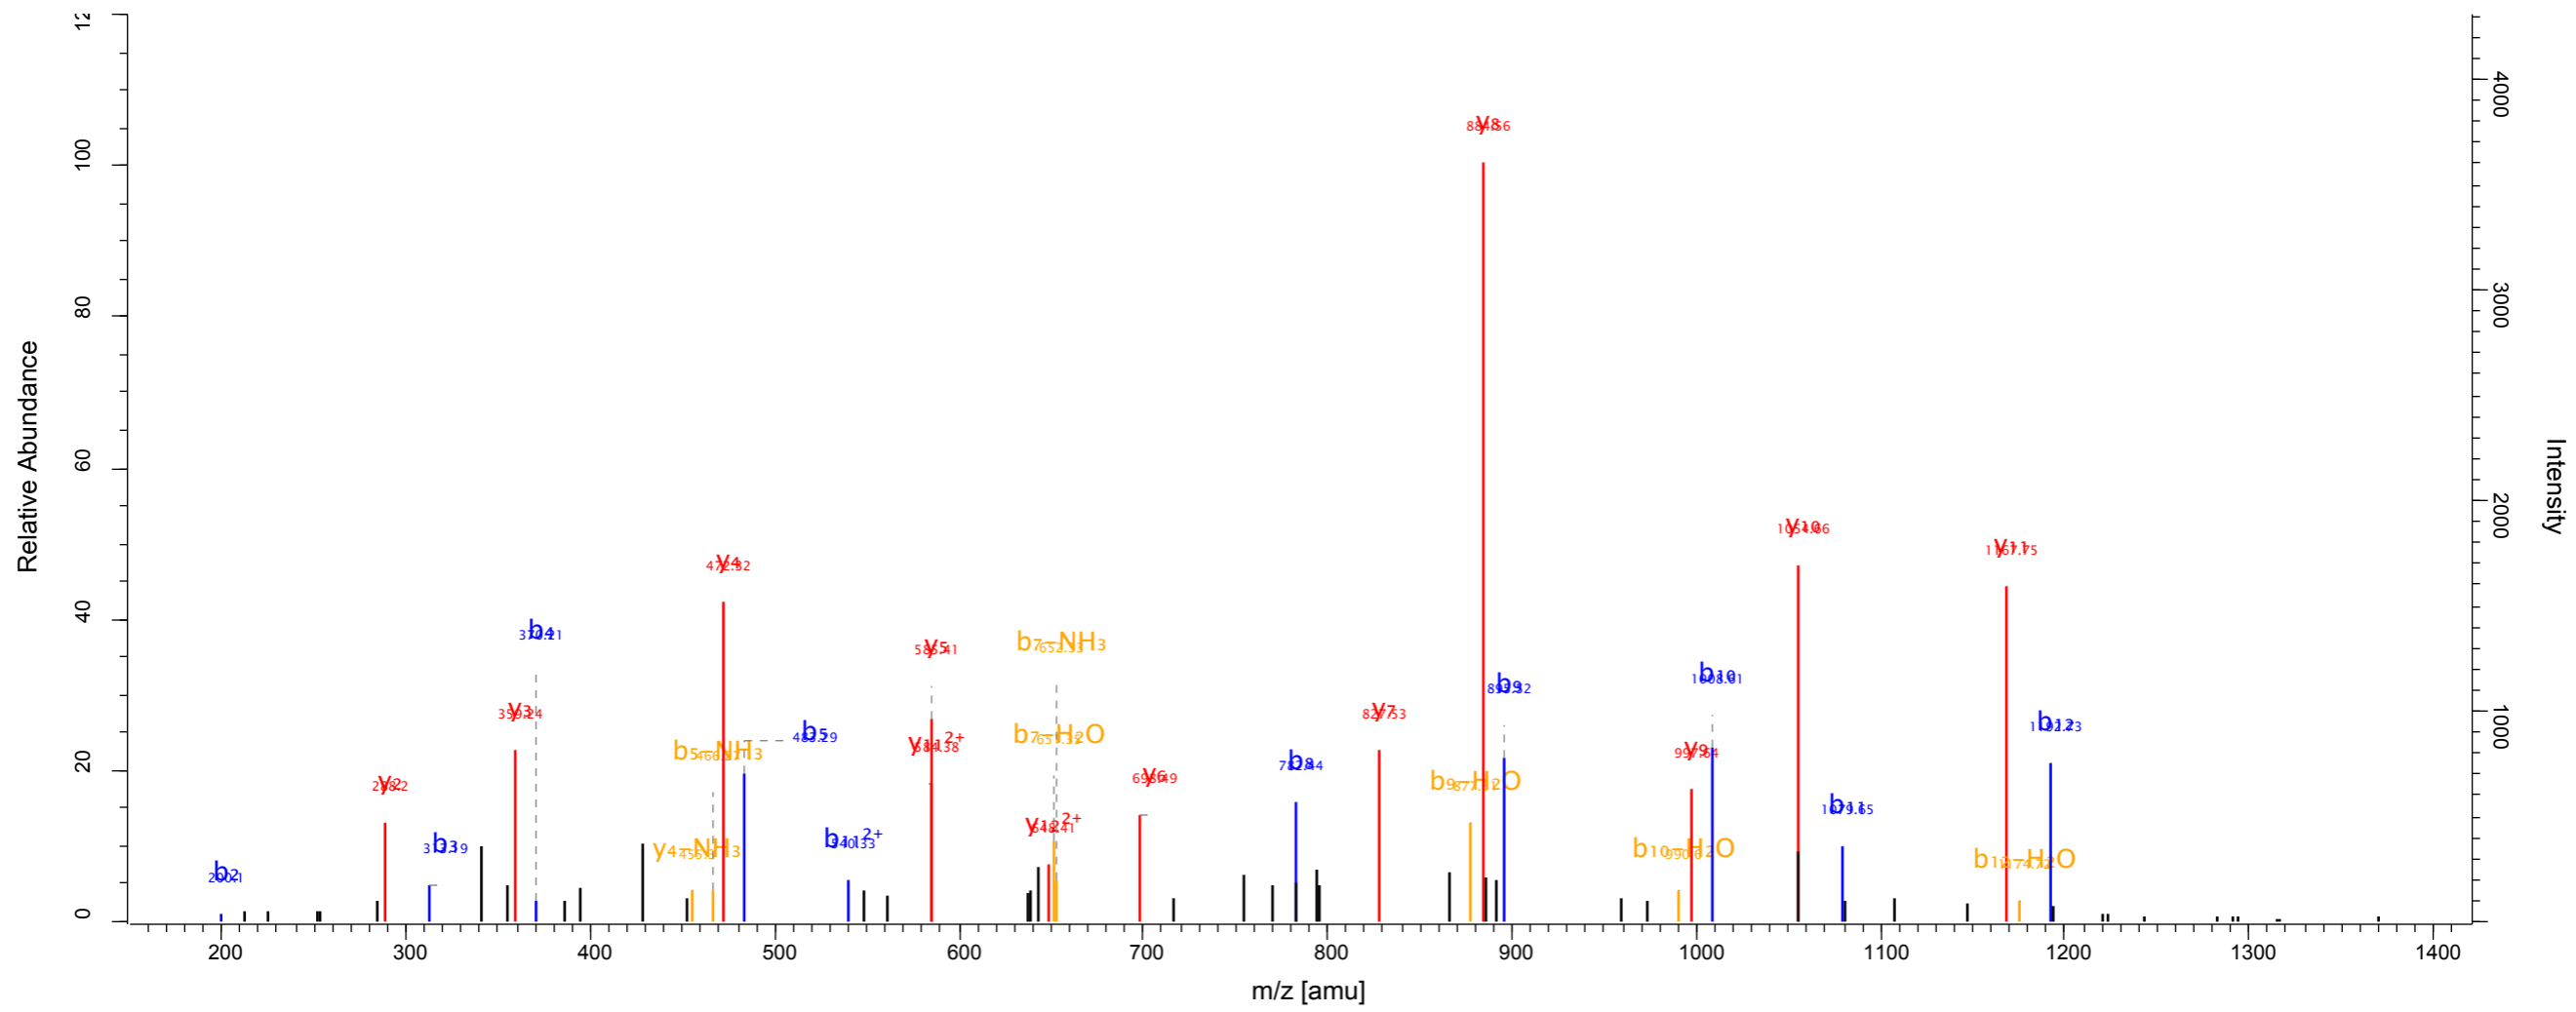

precursor information

|                   |                  |
|-------------------|------------------|
| Mass:             | 1265.82452       |
| m/z:              | 682.02454        |
| Charge:           | 2+               |
| Retention time:   | 100.012802127441 |
| Score:            | 185.5024         |
| Mass Error (ppm): | 0.10647          |
| PEP:              | 7.5586E-09       |
| Precursor Type:   | MULTI            |

general information

|                       |             |
|-----------------------|-------------|
| Annotation:           | 11 of 12    |
| AminoAcids Coverage:  | 85 %        |
| Intensity Coverage:   | 70 %        |
| Peak Coverage:        | 41 %        |
| Protein Localisation: | 136 ... 148 |

| b <sup>2+</sup> ion |              | b ion      |              |    |     |    | y ion        |            | y <sup>2+</sup> ion |            |
|---------------------|--------------|------------|--------------|----|-----|----|--------------|------------|---------------------|------------|
| Δ dalton            | mass         | Δ dalton   | mass         |    | seq |    | Δ dalton     | mass       | Δ dalton            | mass       |
|                     | 72.044390254 |            | 72.044390254 | 1  | A   | 12 |              |            |                     |            |
|                     | 200.10296777 | +0.1831803 | 200.10296777 | 2  | Q   | 11 | 1295.8045479 |            | 648.40591219        | -0.0259683 |
|                     | 313.18703175 | -0.0767412 | 313.18703175 | 3  | I   | 10 | 1167.7459704 | -0.1215807 | 584.37662343        | +0.1616456 |
|                     | 370.20849547 | -0.093139  | 370.20849547 | 4  | G   | 9  | 1054.6619064 | -0.0677902 | 1054.6619064        |            |
|                     | 483.29255945 | -0.0228451 | 483.29255945 | 5  | I   | 8  | 997.64044269 | -0.0208748 | 997.64044269        |            |
|                     | 540.31402317 |            | 540.31402317 | 6  | G   | 7  | 884.55637871 | -0.0365423 | 884.55637871        |            |
|                     | 669.35661627 |            | 669.35661627 | 7  | E   | 6  | 827.53491499 | -0.041873  | 827.53491499        |            |
|                     | 782.44068025 | -0.0834415 | 782.44068025 | 8  | I   | 5  | 698.49232189 | +0.17583   | 698.49232189        |            |
|                     | 895.52474423 | -0.0895025 | 895.52474423 | 9  | I   | 4  | 585.40825791 | +0.0135561 | 585.40825791        |            |
|                     | 1008.6088082 | -0.1863839 | 1008.6088082 | 10 | I   | 3  | 472.32419393 | +0.0677128 | 472.32419393        |            |
| +0.0550536          | 540.32659923 | -0.2200187 | 1079.645922  | 11 | A   | 2  | 359.24012995 | -0.0621514 | 359.24012995        |            |
|                     | 1192.729986  | -0.1610163 | 1192.729986  | 12 | I   | 1  | 288.20301616 | -0.0081309 | 288.20301616        |            |
|                     |              |            |              | 13 | R   | 0  | 175.11895218 |            | 175.11895218        |            |

Scan number 13007 Raw file 20091023\_Orbi6\_MaHe\_SA\_ADH\_exp3\_GFR\_Gel06  
 Method ITMS; CID Genenames PLEKHA3

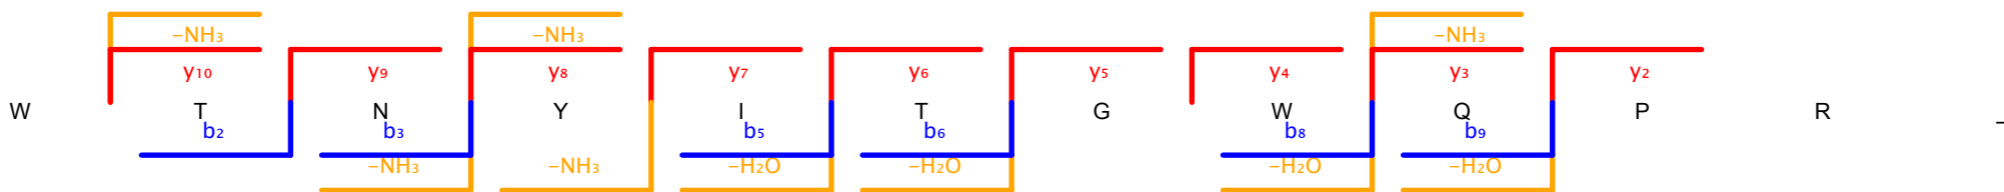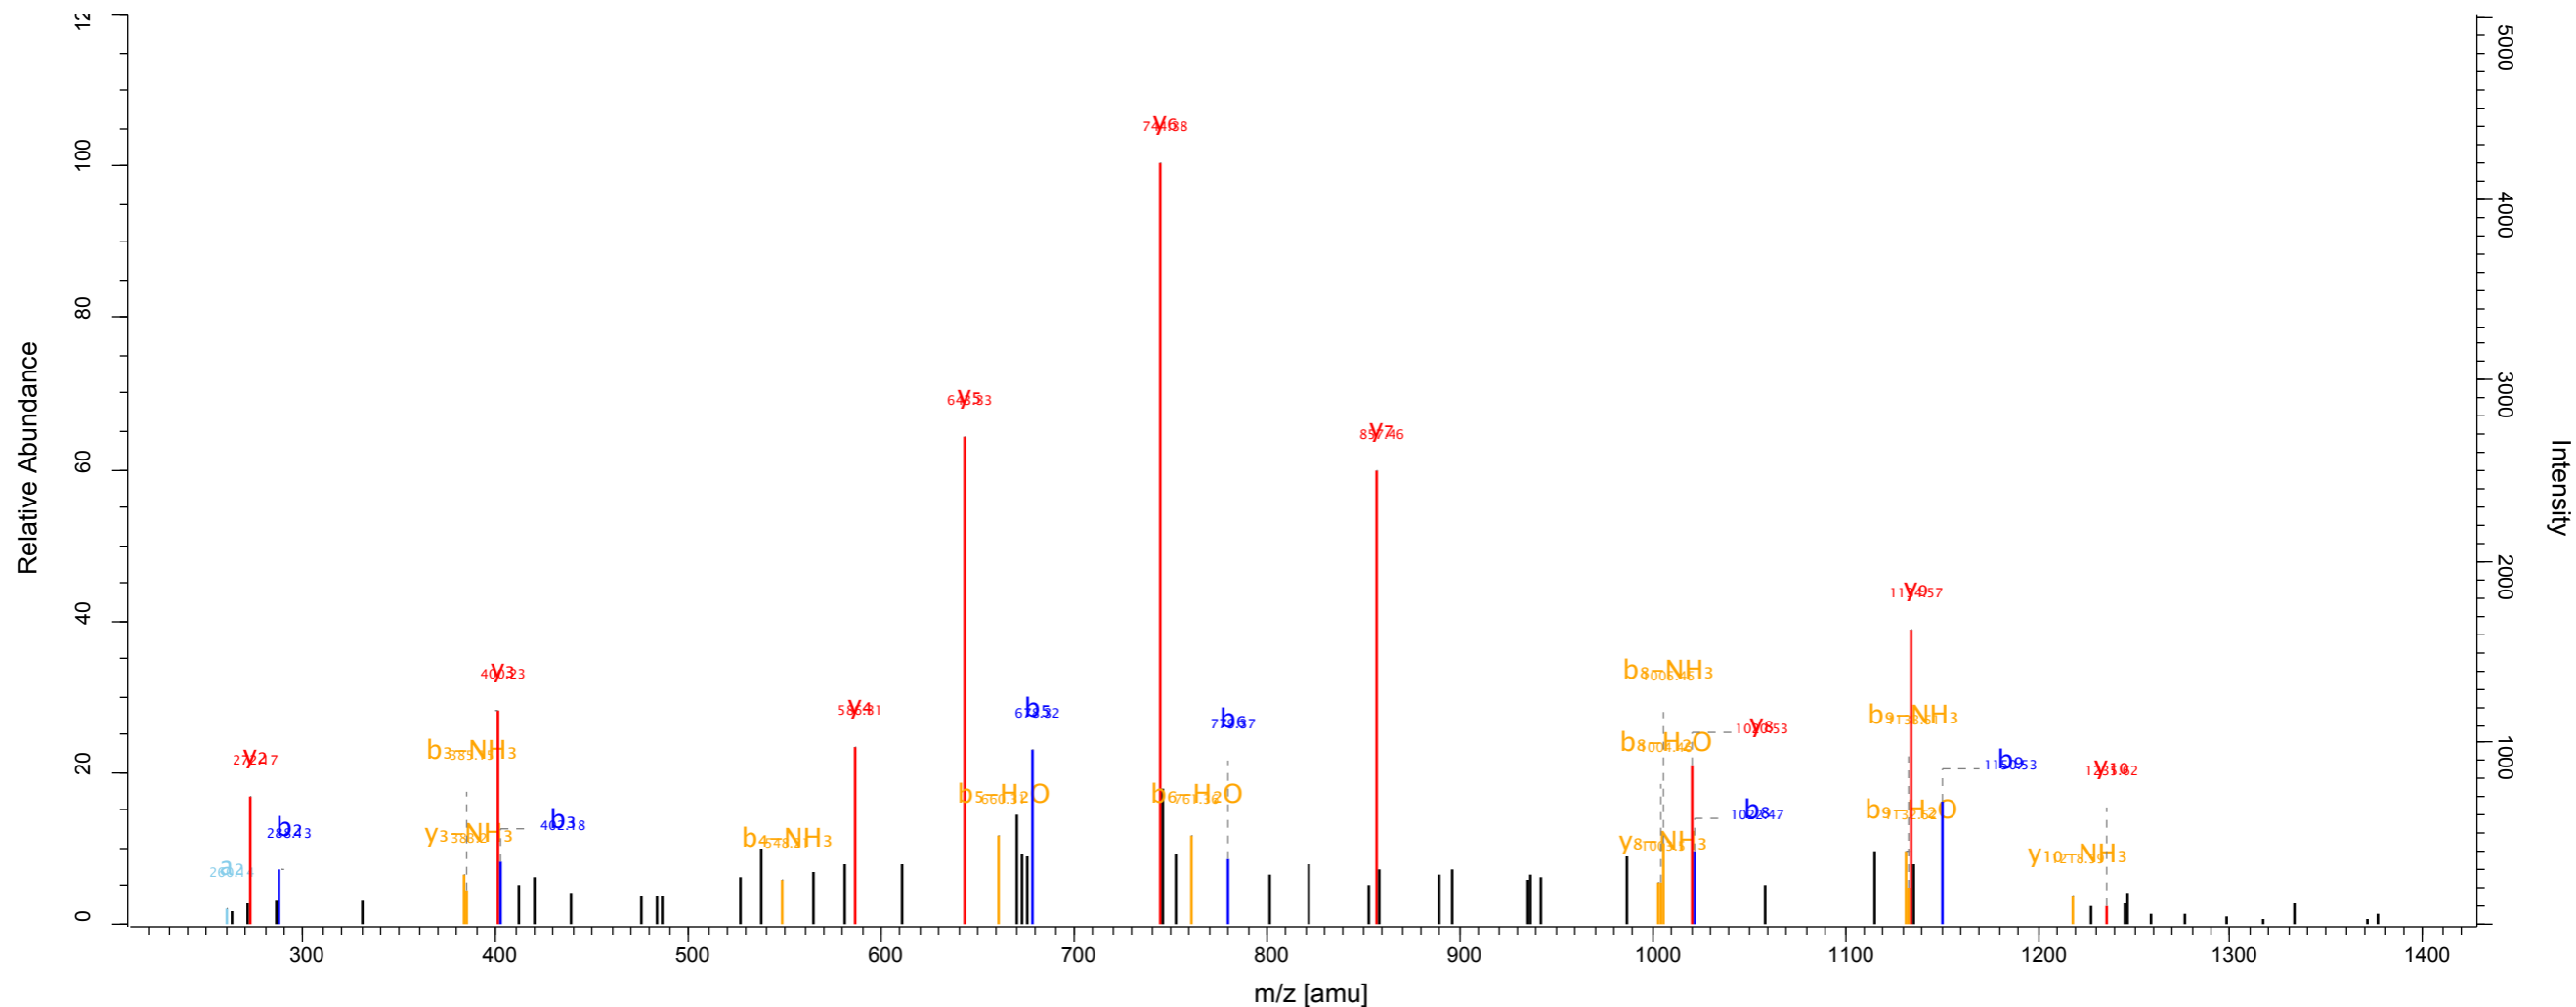

precursor information

|                   |                 |
|-------------------|-----------------|
| Mass:             | 1420.62864      |
| m/z:              | 711.35150       |
| Charge:           | 2+              |
| Retention time:   | 78.067200507168 |
| Score:            | 182.03          |
| Mass Error (ppm): | -0.1042         |
| PEP:              | 7.7246E-11      |
| Precursor Type:   | MULTI           |

general information

|                       |          |
|-----------------------|----------|
| Annotation:           | 0 of 11  |
| AminoAcids Coverage:  | 82 %     |
| Intensity Coverage:   | 68 %     |
| Peak Coverage:        | 30 %     |
| Protein Localisation: | 8 ... 18 |

| a ion           |                | b ion           |                |     | y ion |                 |                |
|-----------------|----------------|-----------------|----------------|-----|-------|-----------------|----------------|
| $\Delta$ dalton | mass           | $\Delta$ dalton | mass           | seq |       | $\Delta$ dalton | mass           |
|                 | 159.091674798  |                 | 187.08658942   | 1   | W     | 10              |                |
| +0.1171165      | 260.139353272  | -0.2153226      | 288.134267894  | 2   | T     | 9               | 1235.616747136 |
|                 | 374.182280719  | -0.4365337      | 402.177195341  | 3   | N     | 8               | 1134.569068662 |
|                 | 537.245609258  |                 | 565.24052388   | 4   | Y     | 7               | 1020.526141214 |
|                 | 650.329673238  | +0.0087862      | 678.32458786   | 5   | I     | 6               | 857.462812676  |
|                 | 751.377351712  | -0.0374885      | 779.372266334  | 6   | T     | 5               | 744.378748696  |
|                 | 808.398815436  |                 | 836.393730058  | 7   | G     | 4               | 643.331070222  |
|                 | 994.478128389  | -0.1217247      | 1022.473043011 | 8   | W     | 3               | 586.309606498  |
|                 | 1122.536705901 | -0.0981488      | 1150.531620523 | 9   | Q     | 2               | 400.230293544  |
|                 | 1219.589469753 |                 | 1247.584384375 | 10  | P     | 1               | 272.171716033  |
|                 |                |                 |                | 11  | R     | 0               | 175.118952181  |

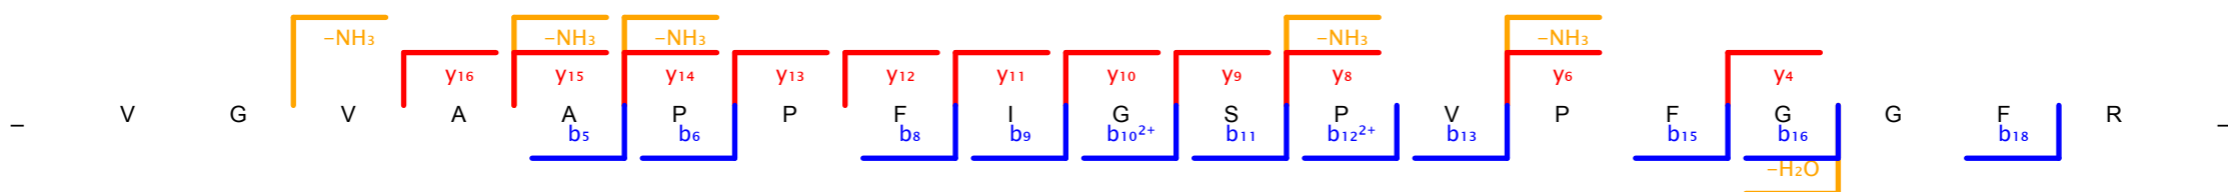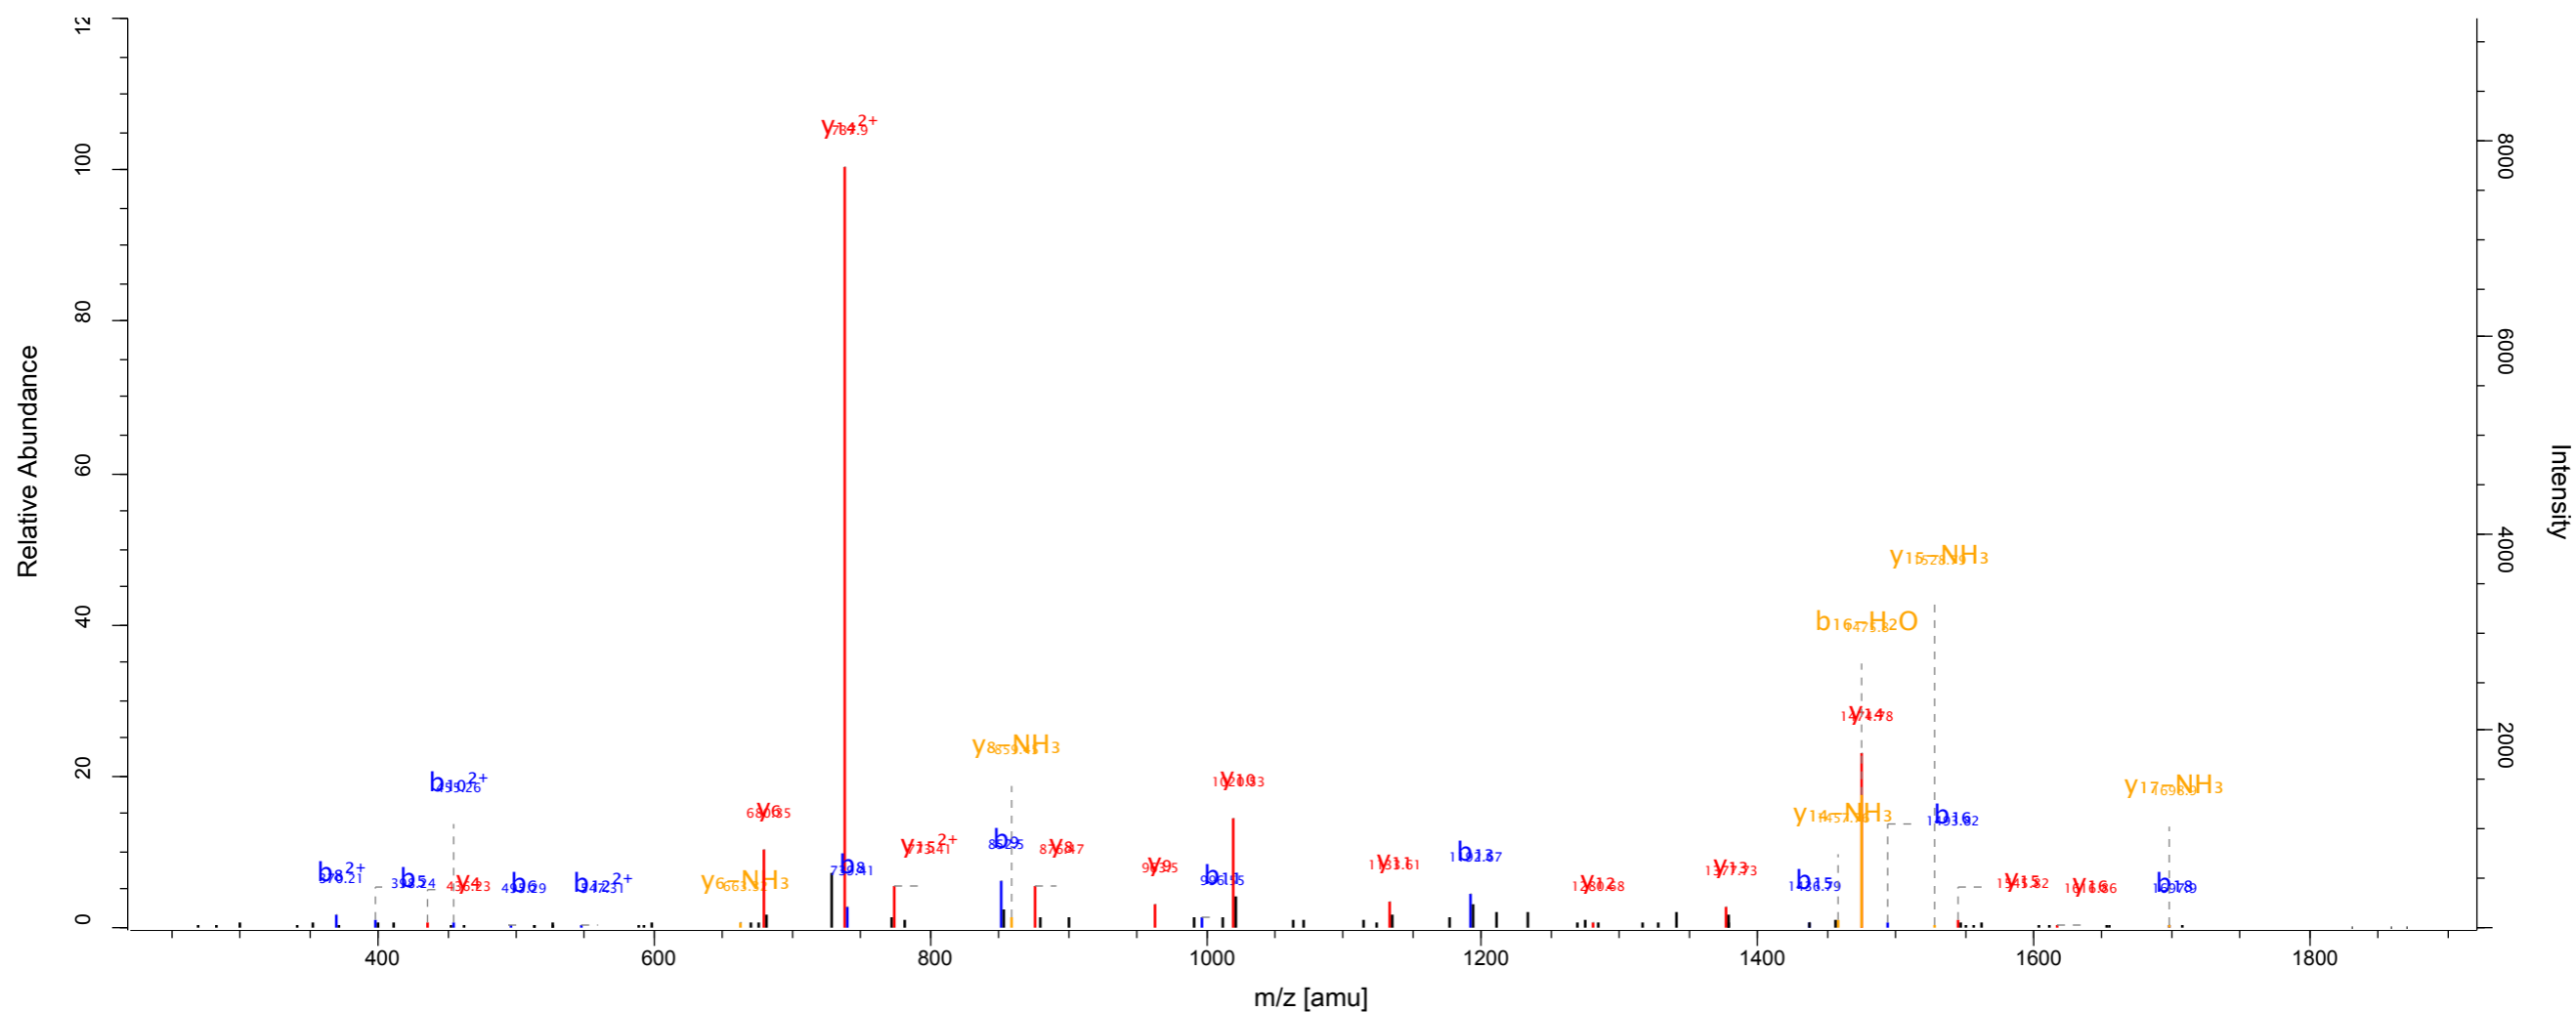

precursor information

|                   |                  |
|-------------------|------------------|
| Mass:             | 1871.0002        |
| m/z:              | 926.51102        |
| Charge:           | 2+               |
| Retention time:   | 107.606060440210 |
| Score:            | 185.2608         |
| Mass Error (ppm): | -0.048072        |
| DEP:              | 2.8148E-10       |
| Precursor Type:   | ISO              |

general information

|                       |            |
|-----------------------|------------|
| Annotation:           | 15 of 10   |
| AminoAcids Coverage:  | 70%        |
| Intensity Coverage:   | 78%        |
| Peak Coverage:        | 24%        |
| Protein Localisation: | 87 ... 105 |

| b <sup>2+</sup> ion |              | b ion      |              |    |     |    | y ion        |            | y <sup>2+</sup> ion |            |
|---------------------|--------------|------------|--------------|----|-----|----|--------------|------------|---------------------|------------|
| Δ dalton            | mass         | Δ dalton   | mass         |    | seq |    | Δ dalton     | mass       | Δ dalton            | mass       |
|                     | 100.07569038 |            | 100.07569038 | 1  | V   | 18 |              |            |                     |            |
|                     | 157.09715411 |            | 157.09715411 | 2  | G   | 17 | 1772.948252  |            | 1772.948252         |            |
|                     | 256.16556802 |            | 256.16556802 | 3  | V   | 16 | 1715.9267883 |            | 1715.9267883        |            |
|                     | 327.20268181 |            | 327.20268181 | 4  | A   | 15 | 1616.8583744 | +0.0650875 | 1616.8583744        |            |
|                     | 398.2397956  | -0.0665168 | 398.2397956  | 5  | A   | 14 | 1545.8212606 | -0.0842001 | 773.41426853        | +0.2304458 |
|                     | 495.29255945 | +0.0759708 | 495.29255945 | 6  | P   | 13 | 1474.7841468 | -0.0939613 | 737.89571164        | +0.2169593 |
|                     | 592.3453233  |            | 592.3453233  | 7  | P   | 12 | 1377.731383  | -0.1527697 | 1377.731383         |            |
| -0.1139797          | 370.21050684 | -0.1148481 | 739.41373722 | 8  | F   | 11 | 1280.6786191 | -0.04129   | 1280.6786191        |            |
|                     | 852.4978012  | -0.1725449 | 852.4978012  | 9  | I   | 10 | 1133.6102052 | -0.0379396 | 1133.6102052        |            |
| +0.0730941          | 455.26327069 |            | 909.51926492 | 10 | G   | 9  | 1020.5261412 | -0.0867491 | 1020.5261412        |            |
|                     | 996.55129333 | +0.03263   | 996.55129333 | 11 | S   | 8  | 963.50467749 | -0.0427634 | 963.50467749        |            |
| +0.173215           | 547.30566683 |            | 1093.6040572 | 12 | P   | 7  | 876.47264908 | -0.0469289 | 876.47264908        |            |
|                     | 1192.6724711 | -0.0701762 | 1192.6724711 | 13 | V   | 6  | 779.41988523 |            | 779.41988523        |            |
|                     | 1289.725235  |            | 1289.725235  | 14 | P   | 5  | 680.35147131 | -0.0074772 | 680.35147131        |            |
|                     | 1436.7936489 | -0.0071498 | 1436.7936489 | 15 | F   | 4  | 583.29870746 |            | 583.29870746        |            |
|                     | 1493.8151126 | +0.3957028 | 1493.8151126 | 16 | G   | 3  | 436.23029354 | +0.0486371 | 436.23029354        |            |
|                     | 1550.8365763 |            | 1550.8365763 | 17 | G   | 2  | 379.20882982 |            | 379.20882982        |            |
|                     | 1697.9049902 | +0.0961084 | 1697.9049902 | 18 | F   | 1  | 322.1873661  |            | 322.1873661         |            |
|                     |              |            |              | 19 | R   | 0  | 175.11895218 |            | 175.11895218        |            |

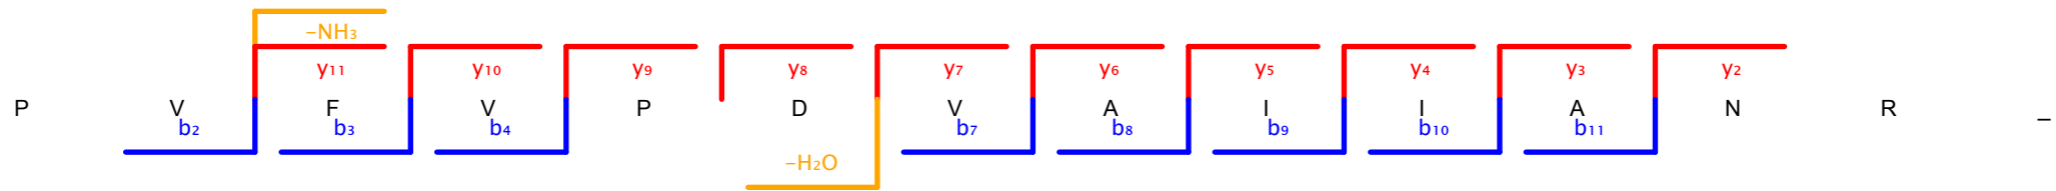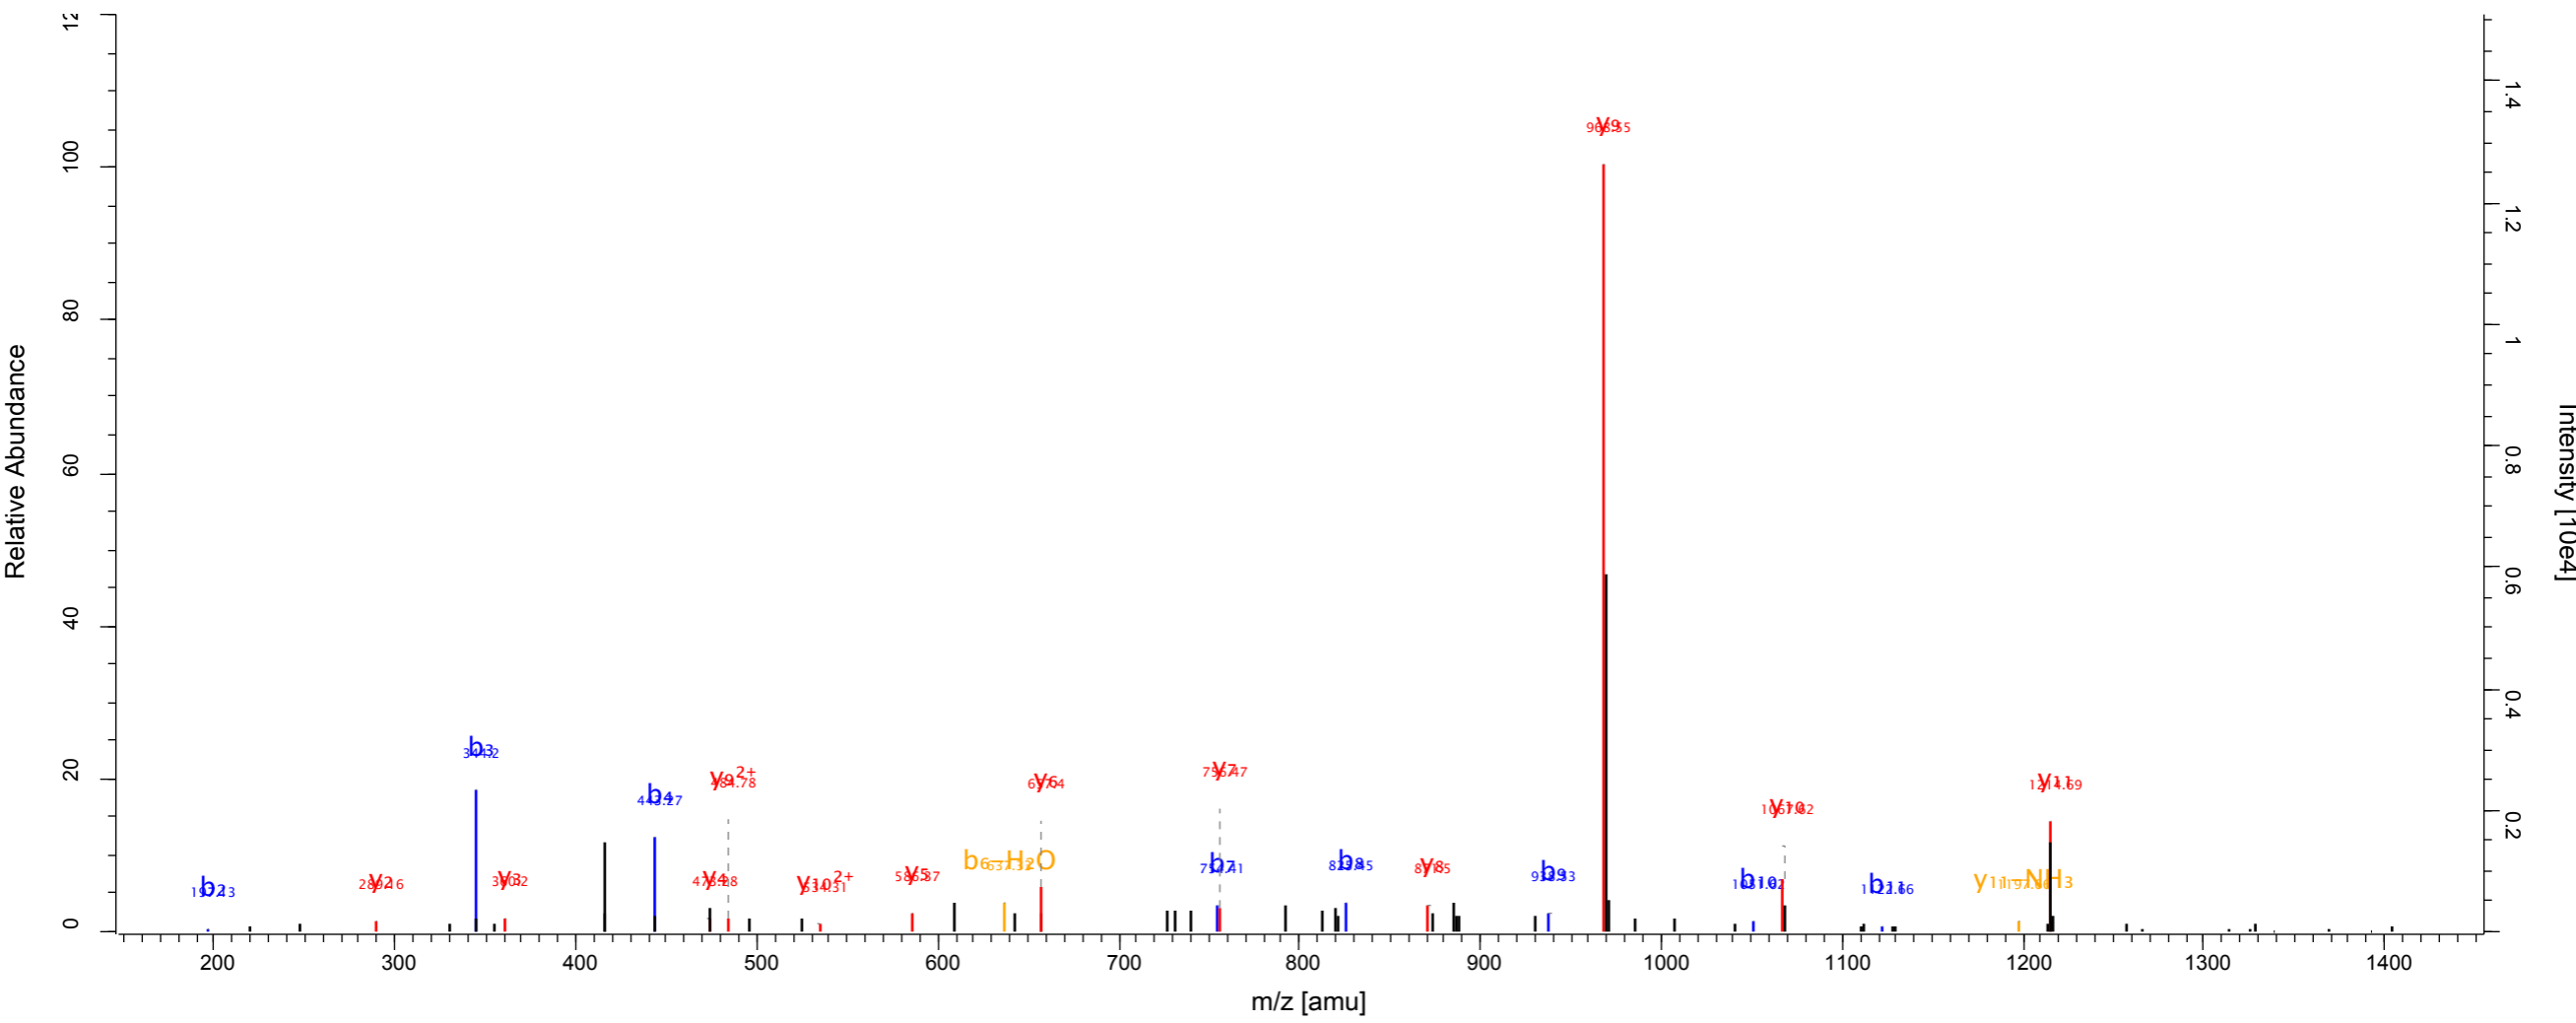

precursor information

|                   |                  |
|-------------------|------------------|
| Mass:             | 1400.80228       |
| m/z:              | 705.00802        |
| Charge:           | 2+               |
| Retention time:   | 02.1855216162100 |
| Score:            | 130.5625         |
| Mass Error (ppm): | 0.14156          |
| PEP:              | 0.0002584        |
| Precursor Type:   | ISO              |

general information

|                       |             |
|-----------------------|-------------|
| Annotation:           | 11 of 12    |
| AminoAcids Coverage:  | 85 %        |
| Intensity Coverage:   | 56 %        |
| Peak Coverage:        | 21 %        |
| Protein Localisation: | 146 ... 158 |

| b ion      |                |    |     |    | y ion          |            | y <sup>2+</sup> ion |            |
|------------|----------------|----|-----|----|----------------|------------|---------------------|------------|
| Δ dalton   | mass           |    | seq |    | Δ dalton       | mass       | Δ dalton            | mass       |
|            | 98.060040319   | 1  | P   | 12 |                |            |                     |            |
| -0.0505123 | 197.128454235  | 2  | V   | 11 | 1313.757597713 |            | 1313.757597713      |            |
| -0.071624  | 344.196868151  | 3  | F   | 10 | 1214.689183797 | -0.0284172 | 1214.689183797      |            |
| -0.0893177 | 443.265282067  | 4  | V   | 9  | 1067.620769881 | -0.0743832 | 534.314023174       | +0.4724148 |
|            | 540.318045919  | 5  | P   | 8  | 968.552355965  | -0.0789063 | 484.779816216       | +0.0406794 |
|            | 655.344988951  | 6  | D   | 7  | 871.499592113  | -0.3159984 | 871.499592113       |            |
| -0.0360835 | 754.413402867  | 7  | V   | 6  | 756.472649081  | -0.0687184 | 756.472649081       |            |
| +0.1514121 | 825.450516655  | 8  | A   | 5  | 657.404235165  | +0.2003181 | 657.404235165       |            |
| -0.267796  | 938.534580636  | 9  | I   | 4  | 586.367121377  | -0.000117  | 586.367121377       |            |
| -0.1796798 | 1051.618644616 | 10 | I   | 3  | 473.283057396  | +0.1561516 | 473.283057396       |            |
| -0.4525113 | 1122.655758404 | 11 | A   | 2  | 360.198993416  | +0.0558284 | 360.198993416       |            |
|            | 1236.698685851 | 12 | N   | 1  | 289.161879628  | +0.127366  | 289.161879628       |            |
|            |                | 13 | R   | 0  | 175.118952181  |            | 175.118952181       |            |

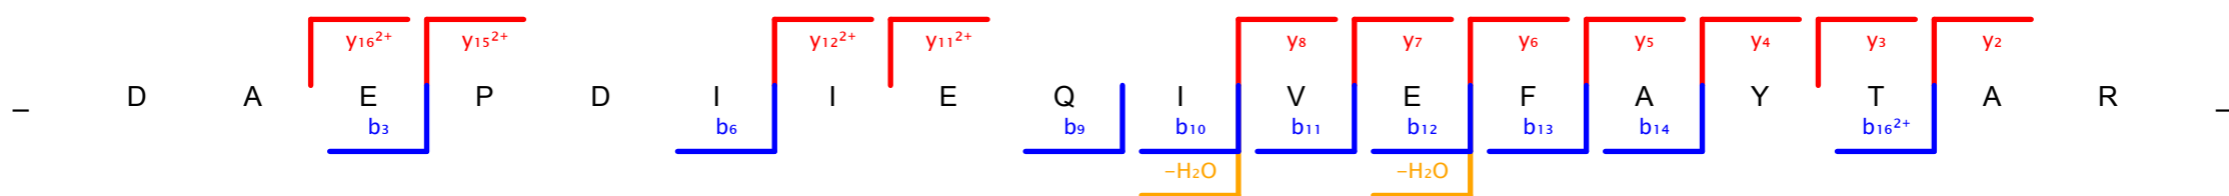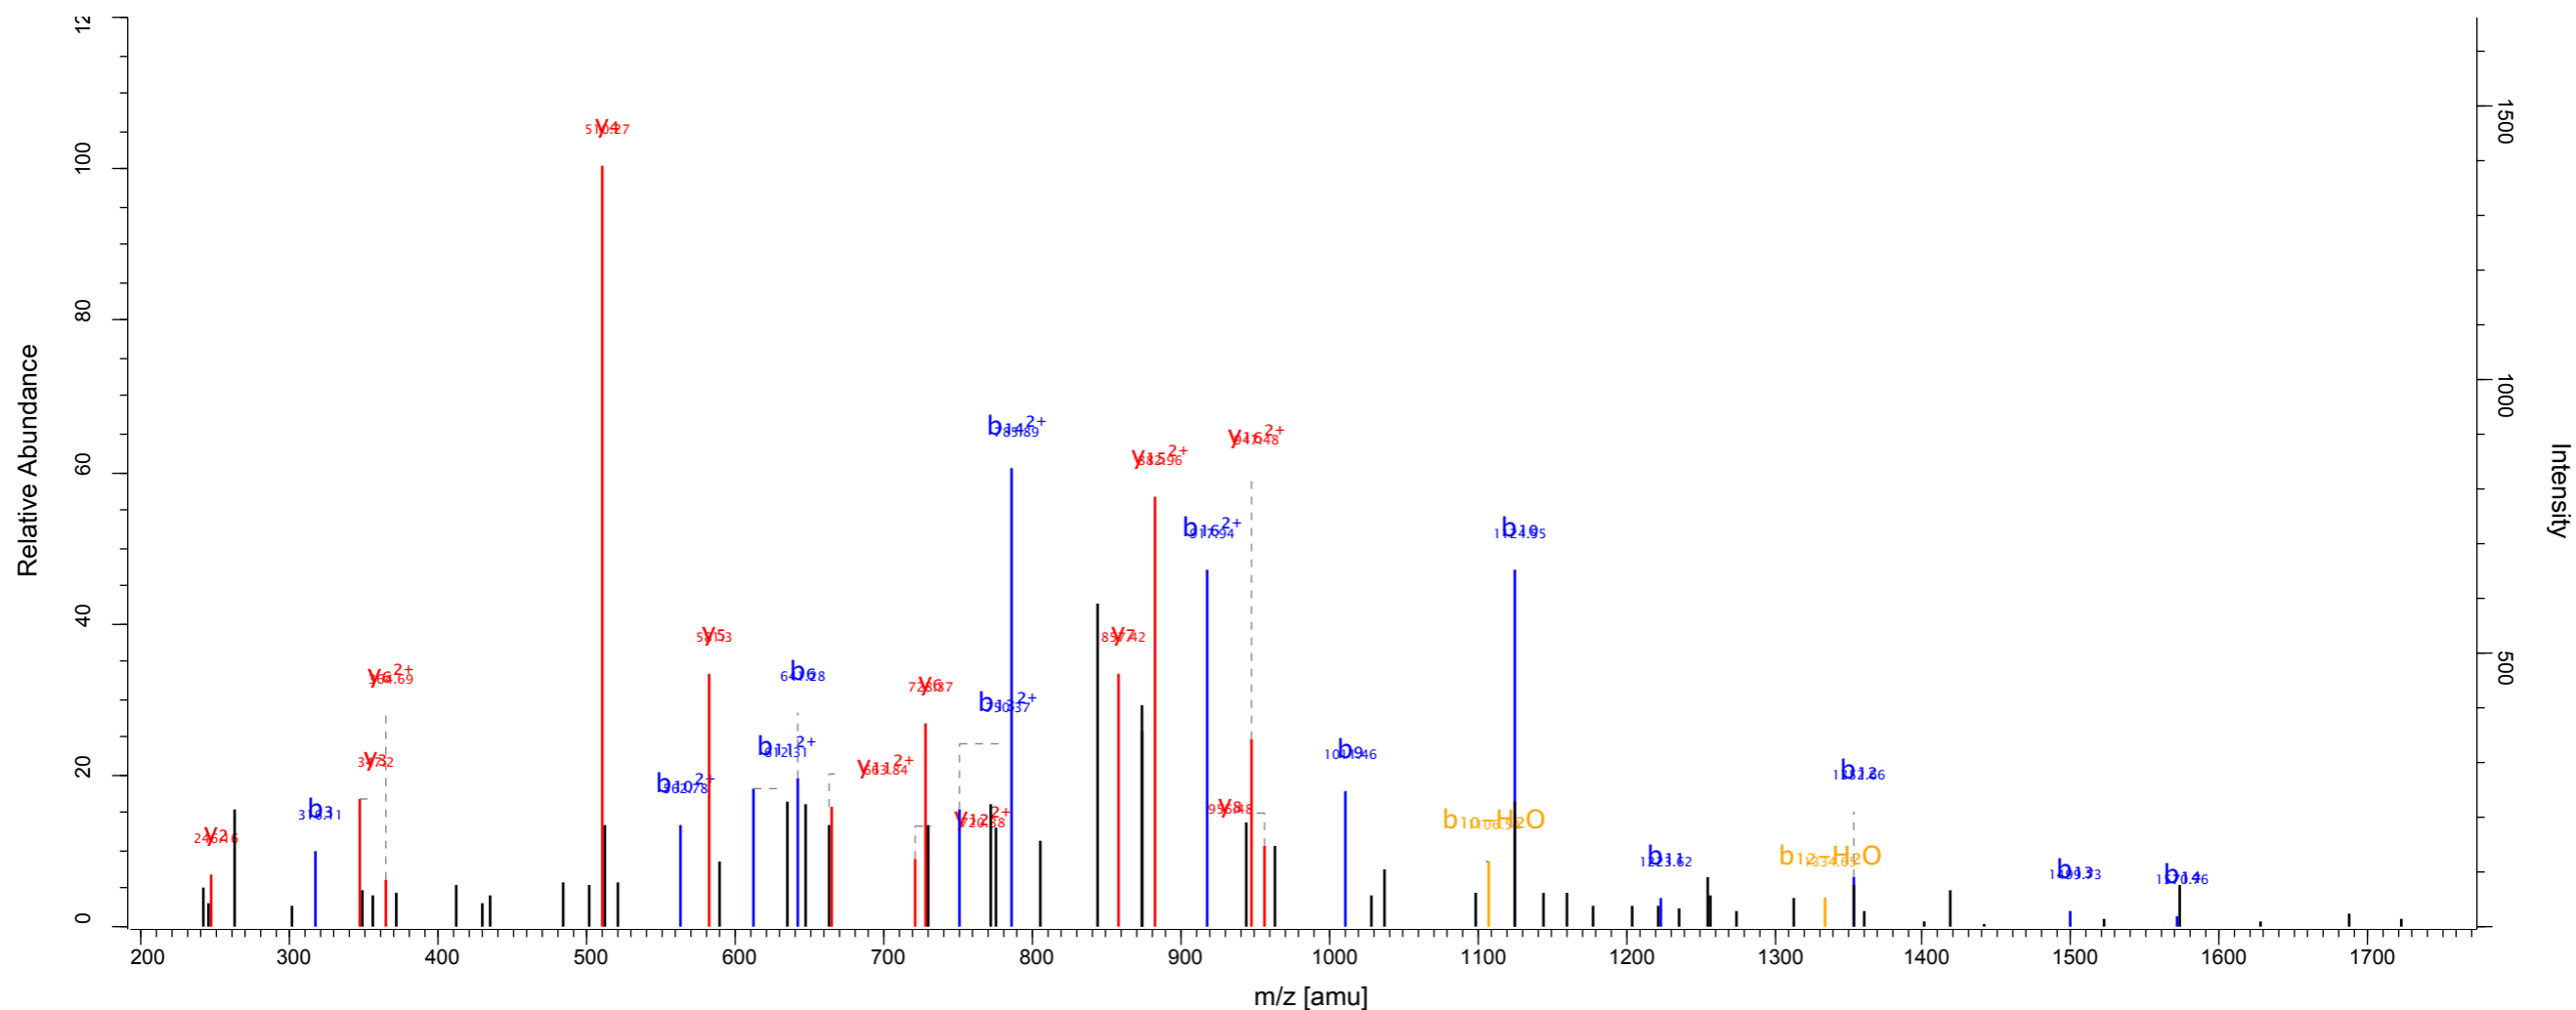

precursor information

|                   |                  |
|-------------------|------------------|
| Mass:             | 2070.01562       |
| m/z:              | 604.01248        |
| Charge:           | 2+               |
| Potenttime:       | 122.178024560547 |
| Score:            | 174.6167         |
| Mass Error (ppm): | 0.20467          |
| DEP:              | 5.26725.12       |
| Precursor Type:   | ISO              |

| b <sup>2+</sup> ion |              | b ion      |              |    |     |    | y ion        |            | y <sup>2+</sup> ion |            |
|---------------------|--------------|------------|--------------|----|-----|----|--------------|------------|---------------------|------------|
| Δ dalton            | mass         | Δ dalton   | mass         |    | seq |    | Δ dalton     | mass       | Δ dalton            | mass       |
|                     | 116.0342195  |            | 116.0342195  | 1  | D   | 17 |              |            |                     |            |
|                     | 187.07133329 |            | 187.07133329 | 2  | A   | 16 | 1964.996384  |            | 1964.996384         |            |
|                     | 316.11392638 | -0.1412091 | 316.11392638 | 3  | E   | 15 | 1893.9592702 |            | 947.48327335        | +0.006961  |
|                     | 413.16669023 |            | 413.16669023 | 4  | P   | 14 | 1764.9166771 |            | 882.9619768         | -0.0280779 |
|                     | 528.19363327 |            | 528.19363327 | 5  | D   | 13 | 1667.8639133 |            | 1667.8639133        |            |
|                     | 641.27769725 | +0.0695928 | 641.27769725 | 6  | I   | 12 | 1552.8369702 |            | 1552.8369702        |            |
|                     | 754.36176123 |            | 754.36176123 | 7  | I   | 11 | 1439.7529063 |            | 720.38009137        | -0.283961  |
|                     | 883.40435432 |            | 883.40435432 | 8  | E   | 10 | 1326.6688423 |            | 663.83805938        | +0.4181662 |
|                     | 1011.4629318 | -0.0923264 | 1011.4629318 | 9  | Q   | 9  | 1197.6262492 |            | 1197.6262492        |            |
| +0.0385377          | 562.77713614 | -0.2374255 | 1124.5469958 | 10 | I   | 8  | 1069.5676717 |            | 1069.5676717        |            |
| -0.0864285          | 612.3113431  | -0.2765425 | 1223.6154097 | 11 | V   | 7  | 956.4836077  | -0.286159  | 956.4836077         |            |
|                     | 1352.6580028 | -0.0571727 | 1352.6580028 | 12 | E   | 6  | 857.41519378 | -0.0140097 | 857.41519378        |            |
| +0.1836295          | 750.36684661 | -0.1460945 | 1499.7264167 | 13 | F   | 5  | 728.37260069 | +0.0130805 | 364.68993858        | +0.298831  |
| -0.1040314          | 785.8854035  | -0.2461965 | 1570.7635305 | 14 | A   | 4  | 581.30418677 | +0.040967  | 581.30418677        |            |
|                     | 1733.8268591 |            | 1733.8268591 | 15 | Y   | 3  | 510.26707298 | -0.0074294 | 510.26707298        |            |
| +0.0685534          | 917.94090701 |            | 1834.8745375 | 16 | T   | 2  | 347.20374444 | +0.0060944 | 347.20374444        |            |
|                     | 1905.9116513 |            | 1905.9116513 | 17 | A   | 1  | 246.15606597 | +0.0280008 | 246.15606597        |            |
|                     |              |            |              | 18 | R   | 0  | 175.11895218 |            | 175.11895218        |            |

general information

|                       |            |
|-----------------------|------------|
| Annotation:           | 15 of 18   |
| AminoAcids Coverage:  | 82%        |
| Intensity Coverage:   | 60%        |
| Peak Coverage:        | 25%        |
| Protein Localisation: | 89 ... 106 |

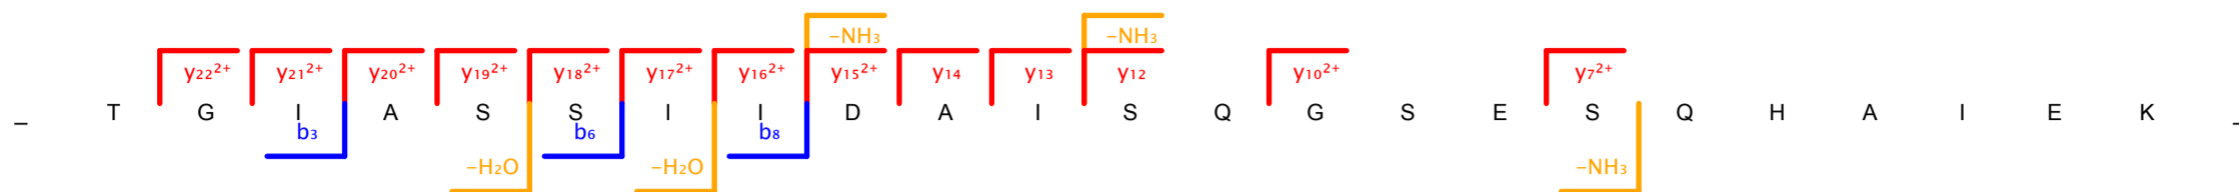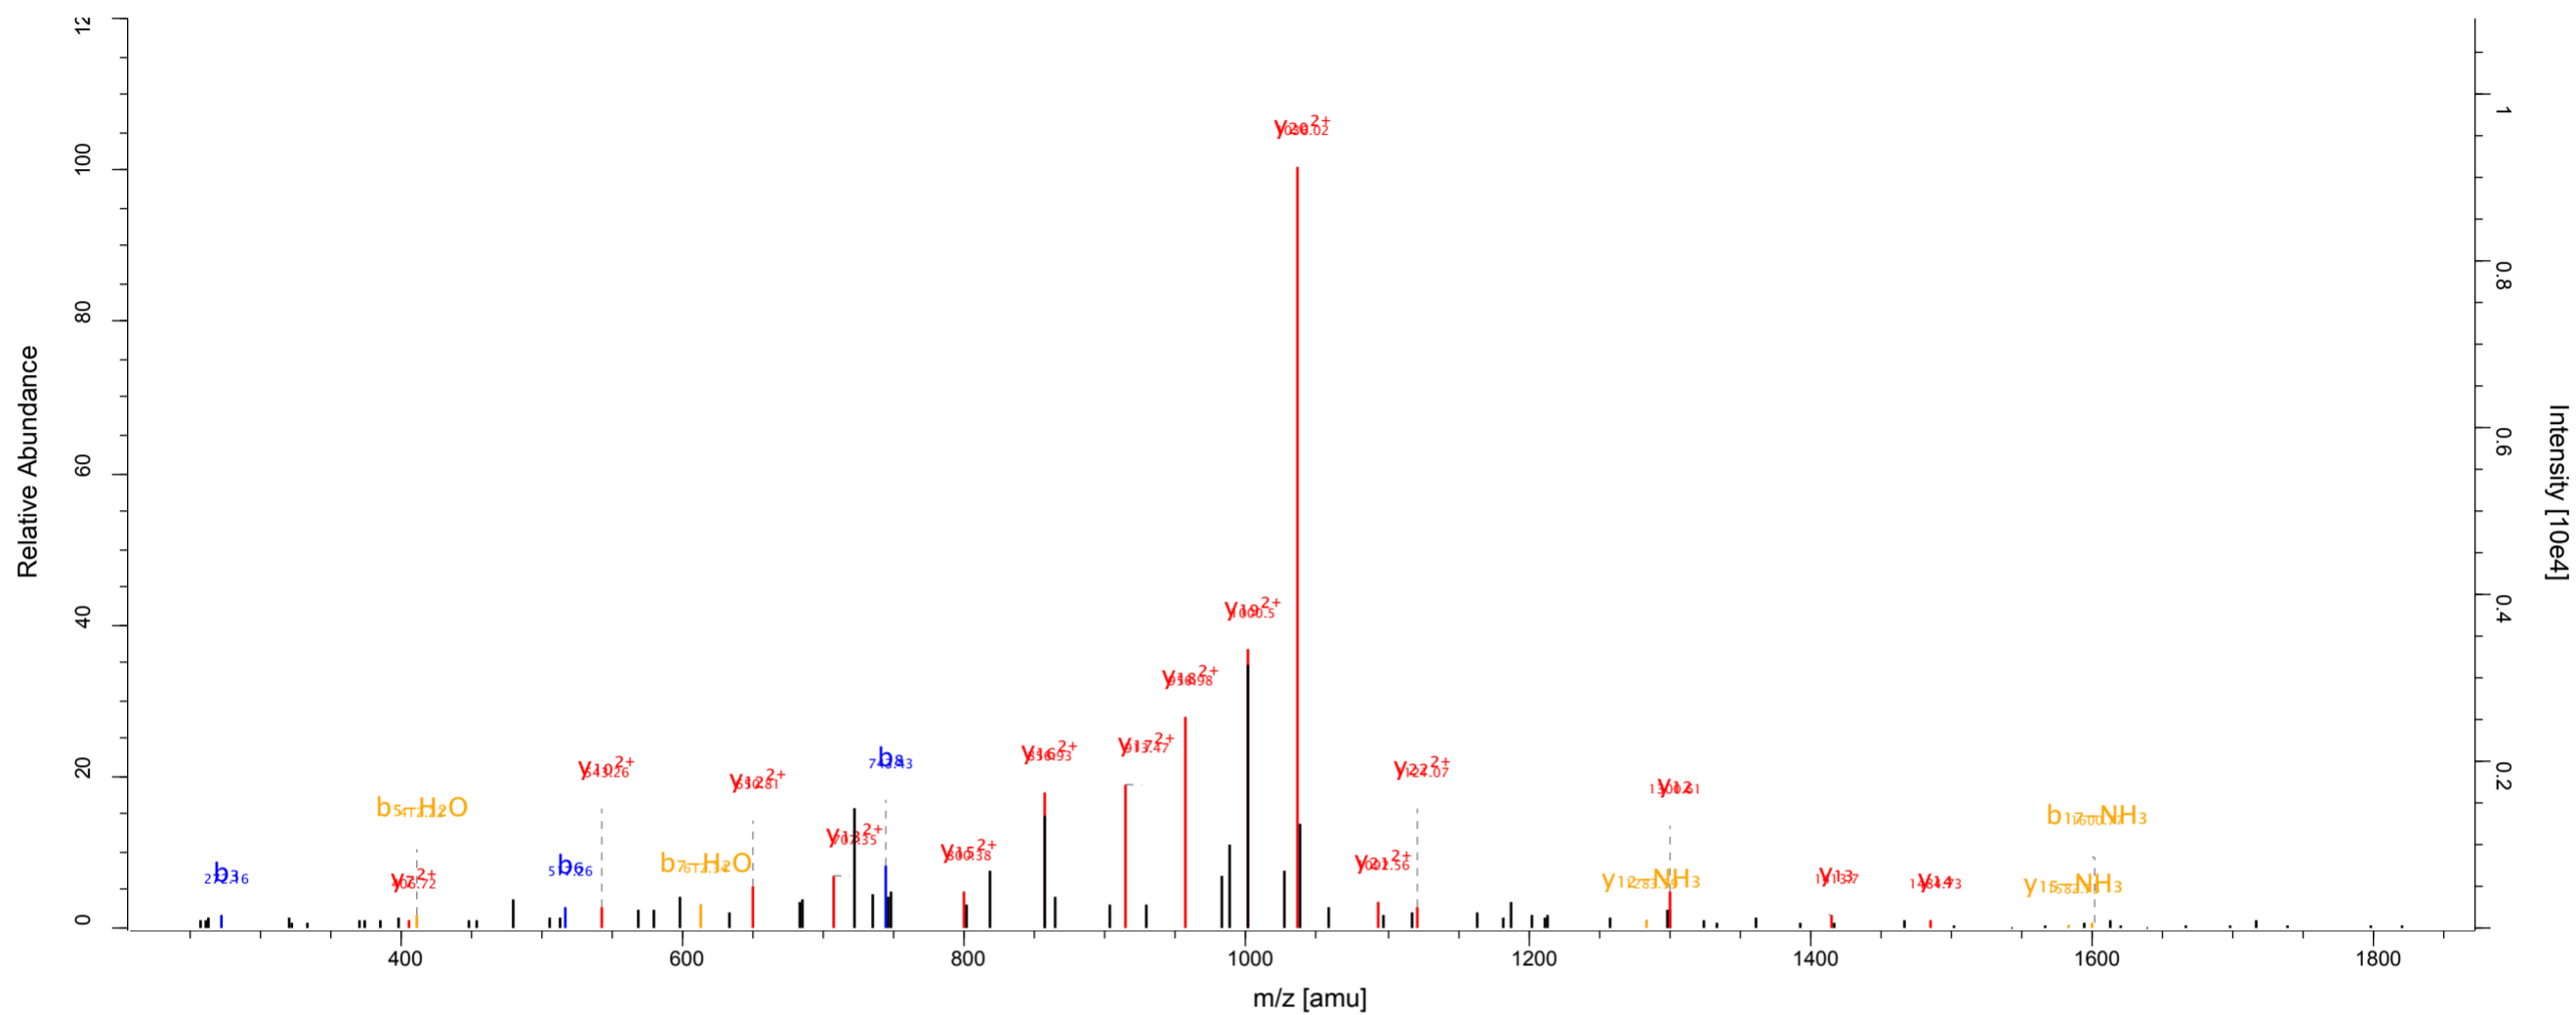

precursor information

|                   |                  |
|-------------------|------------------|
| Mass:             | 2241.1756        |
| m/z:              | 781.20014        |
| Charge:           | 2+               |
| Retention time:   | 06.0700167480460 |
| Score:            | 08.70640         |
| Mass Error (ppm): | 0.2208           |
| PEP:              | 2.8021E-06       |
| Precursor Type:   | MULTI            |

| b ion      |                |    |     |    | y ion          |            | y <sup>2+</sup> ion |            |
|------------|----------------|----|-----|----|----------------|------------|---------------------|------------|
| Δ dalton   | mass           |    | seq |    | Δ dalton       | mass       | Δ dalton            | mass       |
|            | 102.054954941  | 1  | T   | 22 |                |            |                     |            |
|            | 159.076418664  | 2  | G   | 21 | 2241.135731042 |            | 1121.071503754      | +0.2308644 |
| +3.98E-05  | 272.160482645  | 3  | I   | 20 | 2184.114267319 |            | 1092.560771893      | -0.0120658 |
|            | 343.197596432  | 4  | A   | 19 | 2071.030203338 |            | 1036.018739902      | +0.2219828 |
|            | 430.229624842  | 5  | S   | 18 | 1999.993089551 |            | 1000.500183009      | -0.0919188 |
| -0.0761674 | 517.261653252  | 6  | S   | 17 | 1912.961061141 |            | 956.984168804       | +0.2467272 |
|            | 630.345717233  | 7  | I   | 16 | 1825.929032731 |            | 913.468154599       | +0.0920871 |
| +0.1910684 | 743.429781213  | 8  | I   | 15 | 1712.84496875  |            | 856.926122608       | +0.0121098 |
|            | 858.456724245  | 9  | D   | 14 | 1599.76090477  |            | 800.384090618       | -0.1203577 |
|            | 929.493838033  | 10 | A   | 13 | 1484.733961738 | +0.2859357 | 1484.733961738      |            |
|            | 1042.577902013 | 11 | I   | 12 | 1413.69684795  | +0.3872585 | 707.352062208       | -0.0239982 |
|            | 1129.609930423 | 12 | S   | 11 | 1300.61278397  | +0.0650725 | 650.810030218       | -0.0392172 |
|            | 1257.668507935 | 13 | Q   | 10 | 1213.58075556  |            | 1213.58075556       |            |
|            | 1314.689971658 | 14 | G   | 9  | 1085.522178048 |            | 543.264727258       | -0.0396296 |
|            | 1401.722000068 | 15 | S   | 8  | 1028.500714325 |            | 1028.500714325      |            |
|            | 1530.764593164 | 16 | E   | 7  | 941.468685915  |            | 941.468685915       |            |
|            | 1617.796621574 | 17 | S   | 6  | 812.426092819  |            | 406.716684643       | -0.4351295 |
|            | 1745.855199086 | 18 | Q   | 5  | 725.394064409  |            | 725.394064409       |            |
|            | 1882.914110948 | 19 | H   | 4  | 597.335486897  |            | 597.335486897       |            |
|            | 1953.951224736 | 20 | A   | 3  | 460.276575035  |            | 460.276575035       |            |
|            | 2067.035288716 | 21 | I   | 2  | 389.239461247  |            | 389.239461247       |            |
|            | 2196.077881812 | 22 | E   | 1  | 276.155397267  |            | 276.155397267       |            |
|            |                | 23 | K   | 0  | 147.112804171  |            | 147.112804171       |            |

general information

|                       |             |
|-----------------------|-------------|
| Annotation:           | 13 of 23    |
| AminoAcids Coverage:  | 57%         |
| Intensity Coverage:   | 55%         |
| Peak Coverage:        | 76%         |
| Protein Localisation: | 608 ... 630 |

Scan number 19394 Raw file 20091023\_Orbi6\_MaHe\_SA\_ADH\_exp3\_GFR\_Gel14  
 Method ITMS; CID Genenames UNC93B1

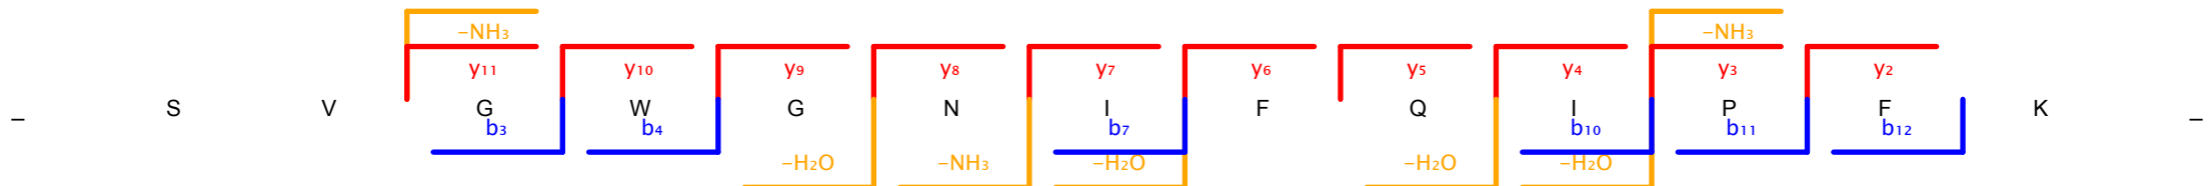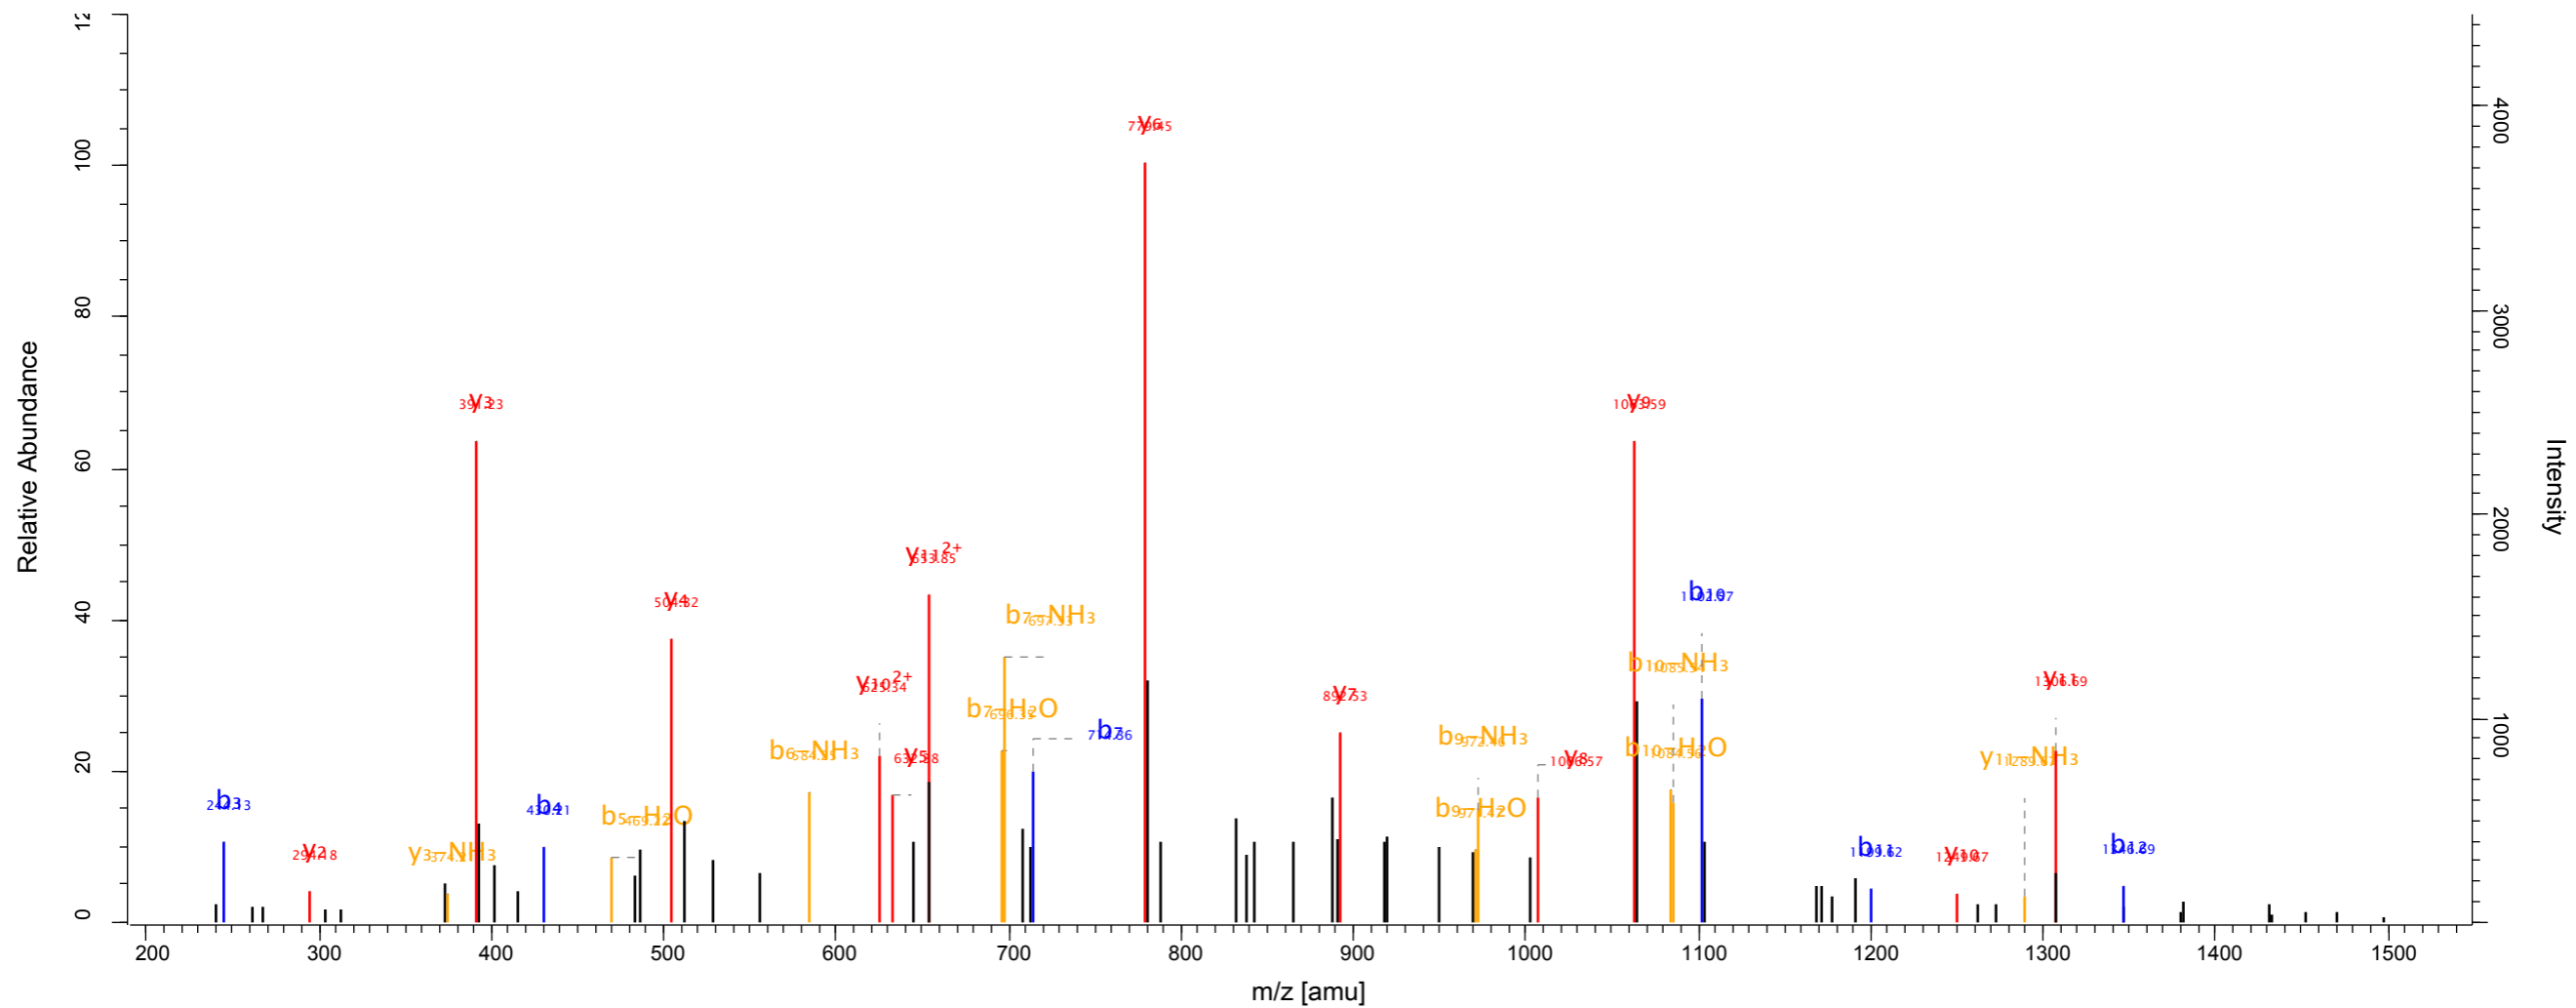

precursor information

|                   |                  |
|-------------------|------------------|
| Mass:             | 1401.72721       |
| m/z:              | 746.00118        |
| Charge:           | 2+               |
| Retention time:   | 115.304744873047 |
| Score:            | 147.2444         |
| Mass Error (ppm): | 0.25377          |
| PEP:              | 1.8760E-05       |
| Precursor Type:   | ISO              |

general information

|                       |             |
|-----------------------|-------------|
| Annotation:           | 10 of 12    |
| AminoAcids Coverage:  | 77%         |
| Intensity Coverage:   | 63%         |
| Peak Coverage:        | 27%         |
| Protein Localisation: | 321 ... 333 |

| b ion      |                |    |     |    | y ion          |            | y <sup>2+</sup> ion |            |
|------------|----------------|----|-----|----|----------------|------------|---------------------|------------|
| Δ dalton   | mass           |    | seq |    | Δ dalton       | mass       | Δ dalton            | mass       |
|            | 88.039304876   | 1  | S   | 12 |                |            |                     |            |
|            | 187.107718793  | 2  | V   | 11 | 1405.762683091 |            | 1405.762683091      |            |
| +0.1556838 | 244.129182516  | 3  | G   | 10 | 1306.694269175 | +0.1183529 | 653.850772821       | +0.0002404 |
| -0.1317743 | 430.20849547   | 4  | W   | 9  | 1249.672805452 | +0.1025852 | 625.340040959       | +0.2320416 |
|            | 487.229959193  | 5  | G   | 8  | 1063.593492498 | -0.0634632 | 1063.593492498      |            |
|            | 601.272886641  | 6  | N   | 7  | 1006.572028774 | -0.2521435 | 1006.572028774      |            |
| -0.0564745 | 714.356950621  | 7  | I   | 6  | 892.529101327  | +0.0975466 | 892.529101327       |            |
|            | 861.425364537  | 8  | F   | 5  | 779.445037347  | -0.0871272 | 779.445037347       |            |
|            | 989.483942049  | 9  | Q   | 4  | 632.376623431  | -0.125952  | 632.376623431       |            |
| -0.0289435 | 1102.568006029 | 10 | I   | 3  | 504.318045919  | -0.0960611 | 504.318045919       |            |
| -0.0526546 | 1199.620769881 | 11 | P   | 2  | 391.233981939  | +0.0135156 | 391.233981939       |            |
| +0.2945809 | 1346.689183797 | 12 | F   | 1  | 294.181218087  | -0.0133104 | 294.181218087       |            |
|            |                | 13 | K   | 0  | 147.112804171  |            | 147.112804171       |            |



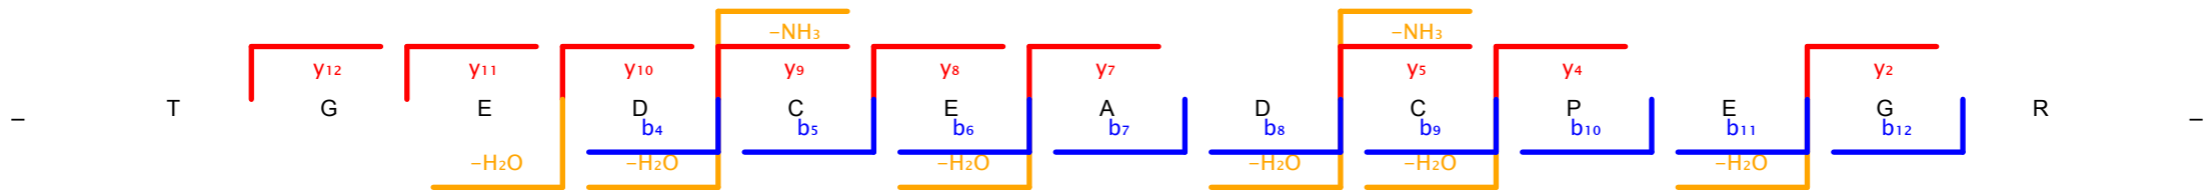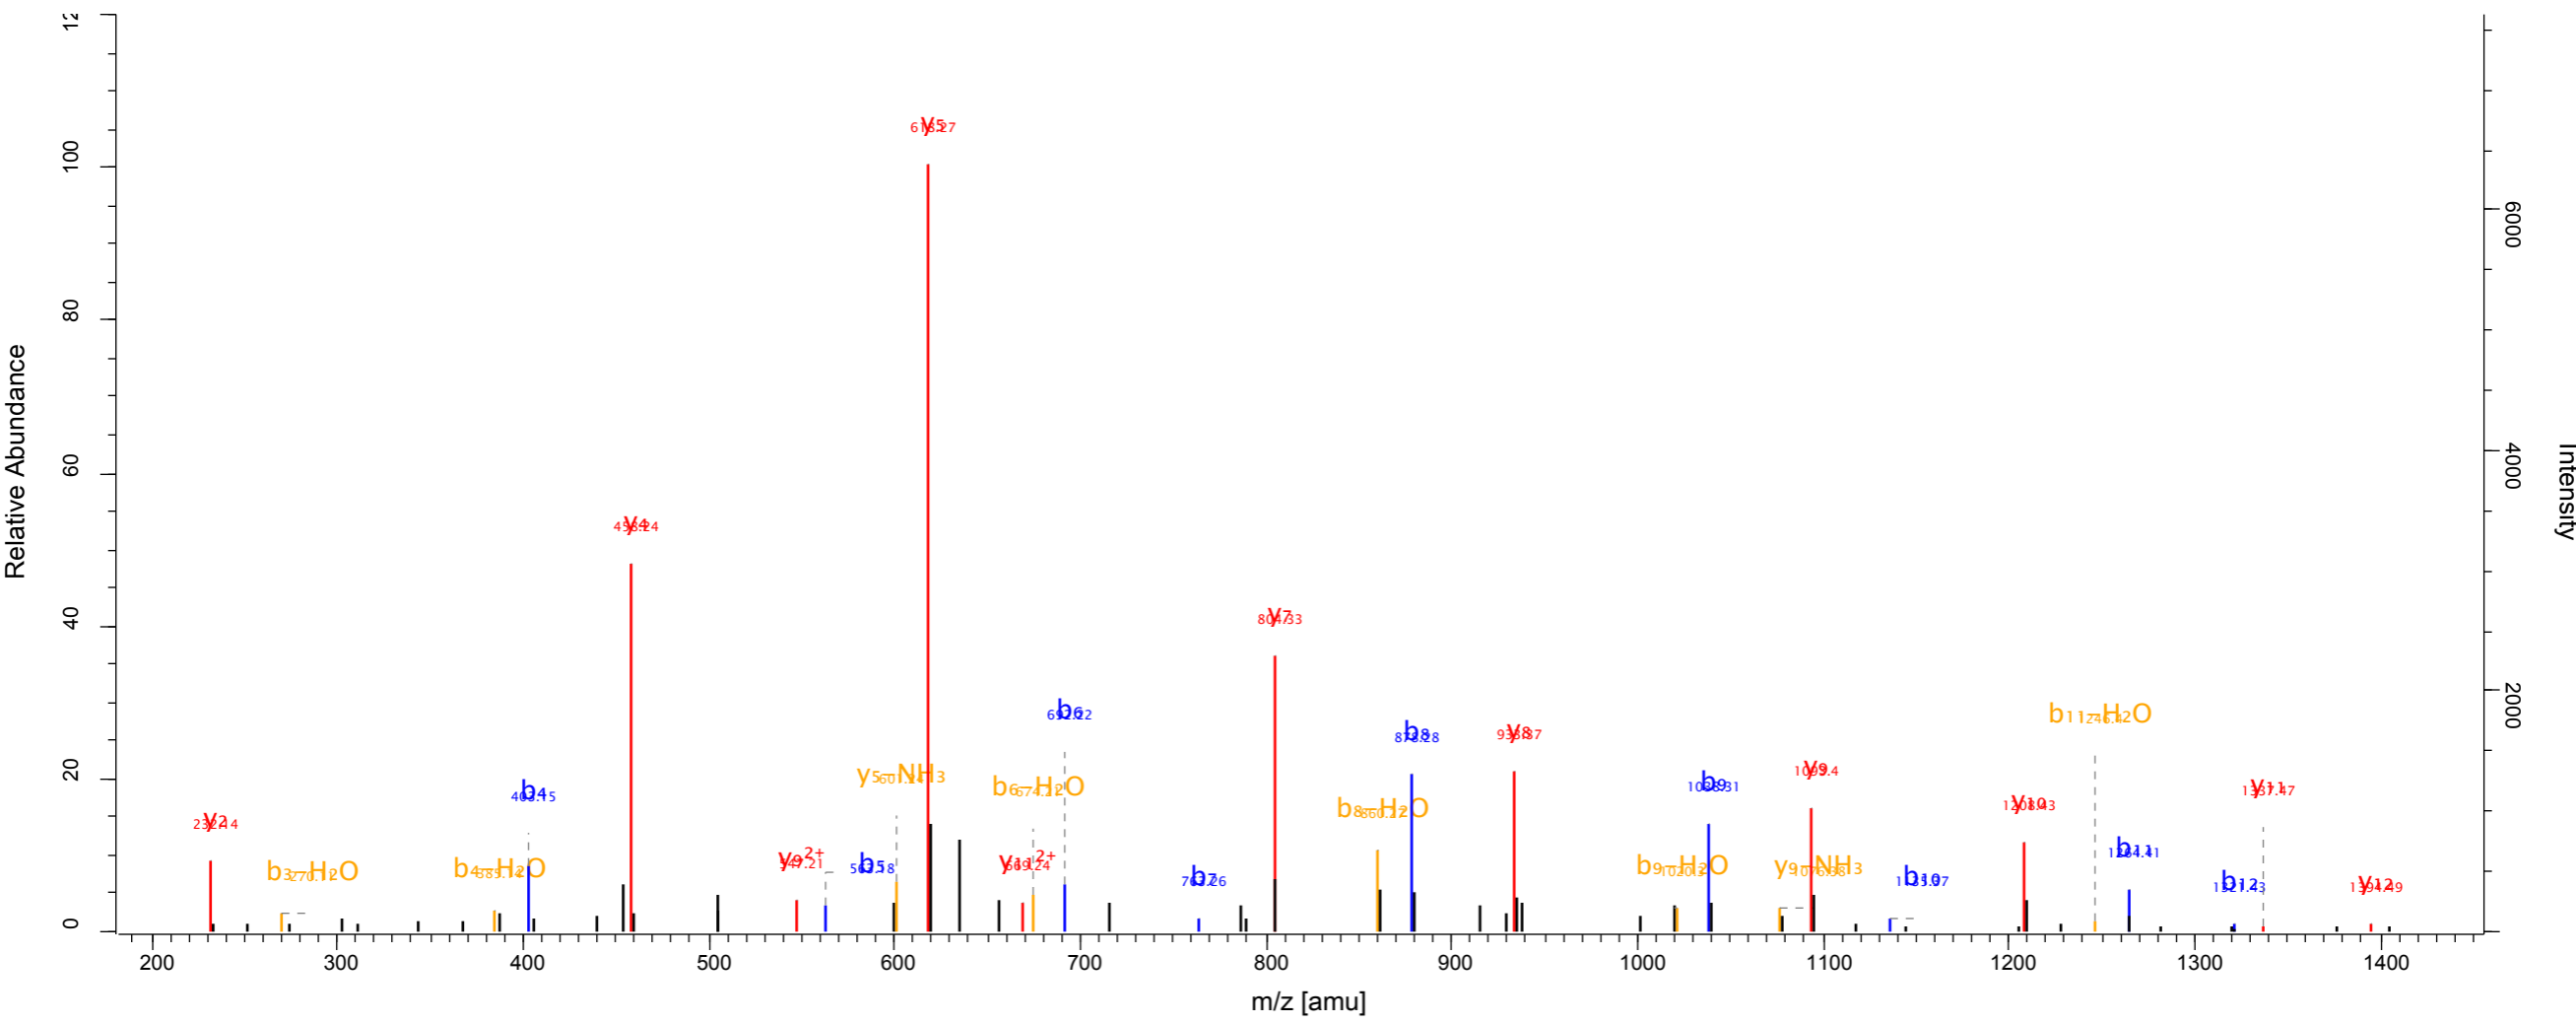

precursor information

|                   |                  |
|-------------------|------------------|
| Mass:             | 1404.52208       |
| m/z:              | 748.27127        |
| Charge:           | 2+               |
| Retention time:   | 20.0807167052222 |
| Score:            | 108.8122         |
| Mass Error (ppm): | -0.76422         |
| PEP:              | 2.0704E-11       |
| Precursor Type:   | ISO              |

general information

|                       |             |
|-----------------------|-------------|
| Annotation:           | 11 of 12    |
| AminoAcids Coverage:  | 85 %        |
| Intensity Coverage:   | 72 %        |
| Peak Coverage:        | 20 %        |
| Protein Localisation: | 765 ... 777 |

| b ion      |                |    |     |    | y ion          |            | y <sup>2+</sup> ion |            |
|------------|----------------|----|-----|----|----------------|------------|---------------------|------------|
| Δ dalton   | mass           |    | seq |    | Δ dalton       | mass       | Δ dalton            | mass       |
|            | 102.054954941  | 1  | T   | 12 |                |            |                     |            |
|            | 159.076418664  | 2  | G   | 11 | 1394.494719023 | -0.0639329 | 1394.494719023      |            |
|            | 288.11901176   | 3  | E   | 10 | 1337.4732553   | -0.0623666 | 669.240265883       | +0.4364309 |
| +0.0491746 | 403.145954792  | 4  | D   | 9  | 1208.430662204 | +0.0803241 | 1208.430662204      |            |
| +0.1373618 | 563.176602994  | 5  | C   | 8  | 1093.403719172 | +0.0841959 | 547.205497819       | +0.0128249 |
| +0.091656  | 692.21919609   | 6  | E   | 7  | 933.37307097   | -0.0349972 | 933.37307097        |            |
| +0.2414318 | 763.256309878  | 7  | A   | 6  | 804.330477874  | +0.0782135 | 804.330477874       |            |
| -0.0505869 | 878.28325291   | 8  | D   | 5  | 733.293364086  |            | 733.293364086       |            |
| -0.0204441 | 1038.313901111 | 9  | C   | 4  | 618.266421054  | +0.032346  | 618.266421054       |            |
| +0.0089454 | 1135.366664963 | 10 | P   | 3  | 458.235772853  | +0.0290587 | 458.235772853       |            |
| -0.0746633 | 1264.40925806  | 11 | E   | 2  | 361.183009001  |            | 361.183009001       |            |
| -0.2069669 | 1321.430721783 | 12 | G   | 1  | 232.140415905  | +0.0954087 | 232.140415905       |            |
|            |                | 13 | R   | 0  | 175.118952181  |            | 175.118952181       |            |

Scan number 14134 Raw file 20091025\_Orbi6\_MaHe\_SA\_ADH\_exp3\_Matr\_dil\_Gel02  
 Method ITMS; CID Genenames TM4SF18

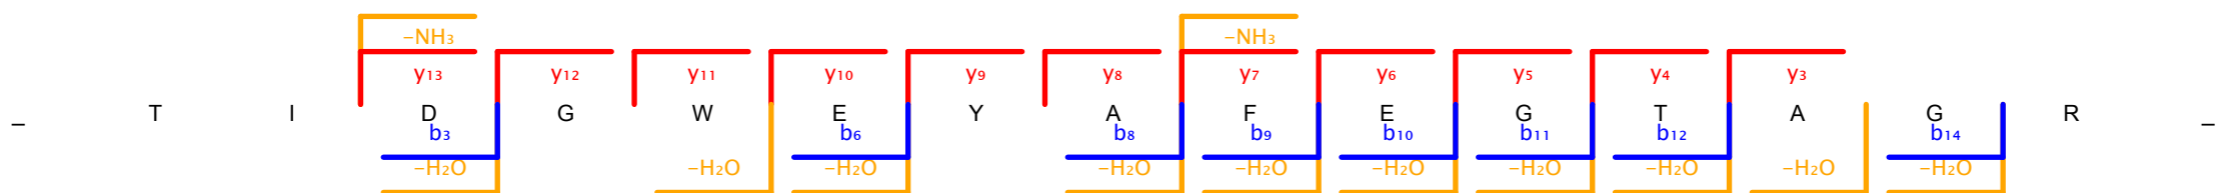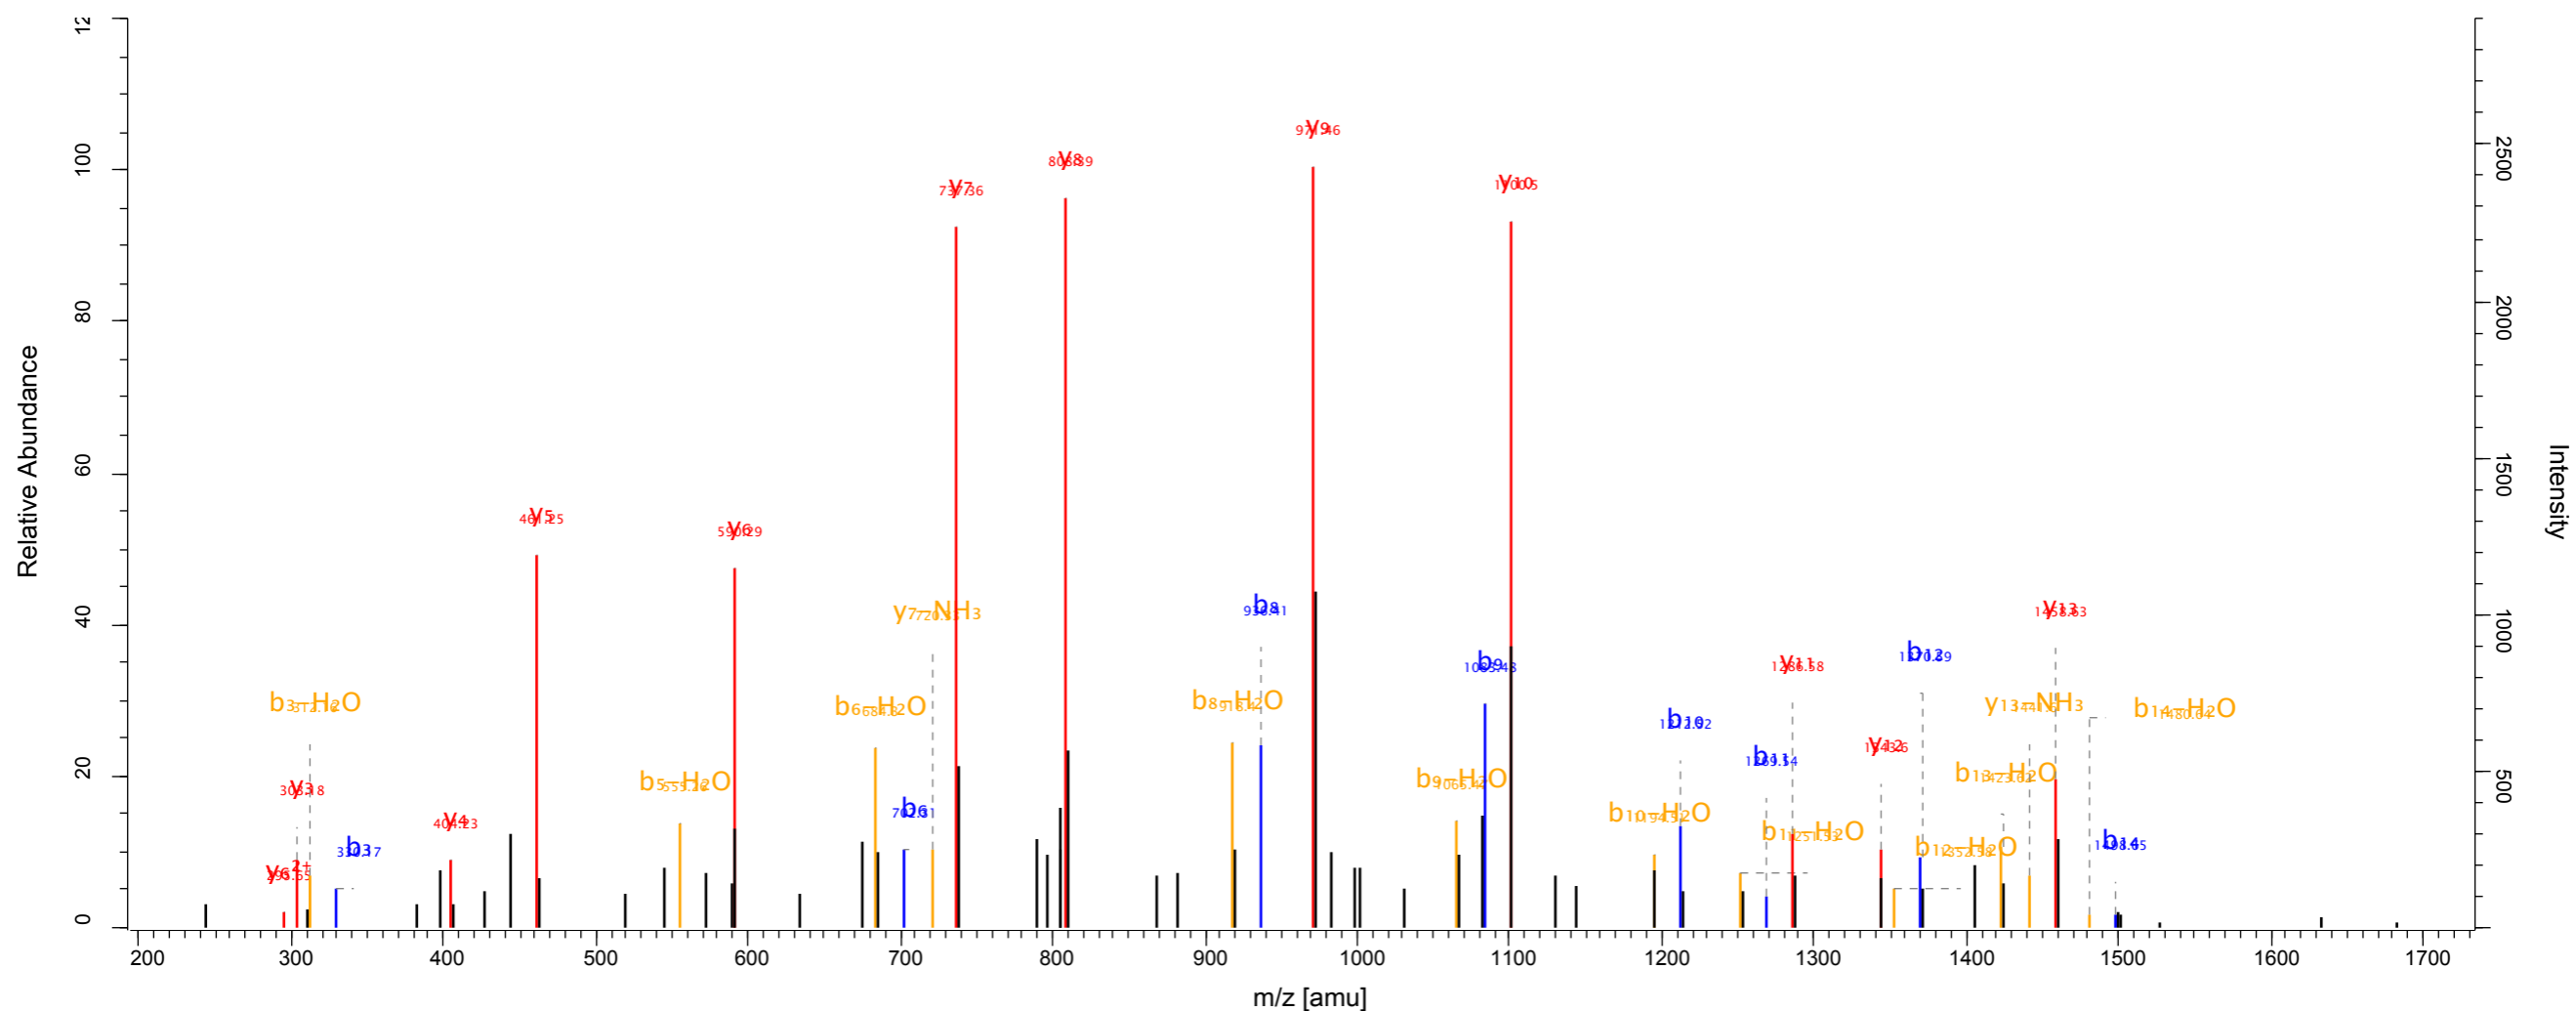

precursor information

|                   |                  |
|-------------------|------------------|
| Mass:             | 1671.75222       |
| m/z:              | 826.88288        |
| Charge:           | 2+               |
| Potentiaetime:    | 88.1841582251052 |
| Score:            | 100.7002         |
| Mass Error [ppm]: | 0.1802           |
| PEP:              | 1.0125E-10       |
| Precursor Type:   | ISO              |

general information

|                       |             |
|-----------------------|-------------|
| Annotation:           | 12 of 15    |
| AminoAcids Coverage:  | 80%         |
| Intensity Coverage:   | 64%         |
| Peak Coverage:        | 40%         |
| Protein Localisation: | 123 ... 137 |

| b ion      |                |    |     |    | y ion          |            | y <sup>2+</sup> ion |            |
|------------|----------------|----|-----|----|----------------|------------|---------------------|------------|
| Δ dalton   | mass           |    | seq |    | Δ dalton       | mass       | Δ dalton            | mass       |
|            | 102.054954941  | 1  | T   | 14 |                |            |                     |            |
|            | 215.139018921  | 2  | I   | 13 | 1571.712498014 |            | 1571.712498014      |            |
| -0.0712659 | 330.165961953  | 3  | D   | 12 | 1458.628434034 | -0.0645913 | 1458.628434034      |            |
|            | 387.187425677  | 4  | G   | 11 | 1343.601491002 | +0.0479231 | 1343.601491002      |            |
|            | 573.26673863   | 5  | W   | 10 | 1286.580027278 | -0.0575663 | 1286.580027278      |            |
| +0.002619  | 702.309331726  | 6  | E   | 9  | 1100.500714325 | -0.043561  | 1100.500714325      |            |
|            | 865.372660265  | 7  | Y   | 8  | 971.458121229  | -0.0801305 | 971.458121229       |            |
| -0.1426232 | 936.409774052  | 8  | A   | 7  | 808.39479269   | -0.0829641 | 808.39479269        |            |
| +0.0318218 | 1083.478187969 | 9  | F   | 6  | 737.357678902  | +0.0225091 | 737.357678902       |            |
| -0.044951  | 1212.520781065 | 10 | E   | 5  | 590.289264986  | +0.0411183 | 295.648270726       | -0.4391643 |
| -0.1075524 | 1269.542244788 | 11 | G   | 4  | 461.24667189   | +0.0373247 | 461.24667189        |            |
| -0.1342348 | 1370.589923263 | 12 | T   | 3  | 404.225208166  | -0.1325568 | 404.225208166       |            |
|            | 1441.62703705  | 13 | A   | 2  | 303.177529692  | +0.1311251 | 303.177529692       |            |
| -0.2954734 | 1498.648500774 | 14 | G   | 1  | 232.140415905  |            | 232.140415905       |            |
|            |                | 15 | R   | 0  | 175.118952181  |            | 175.118952181       |            |

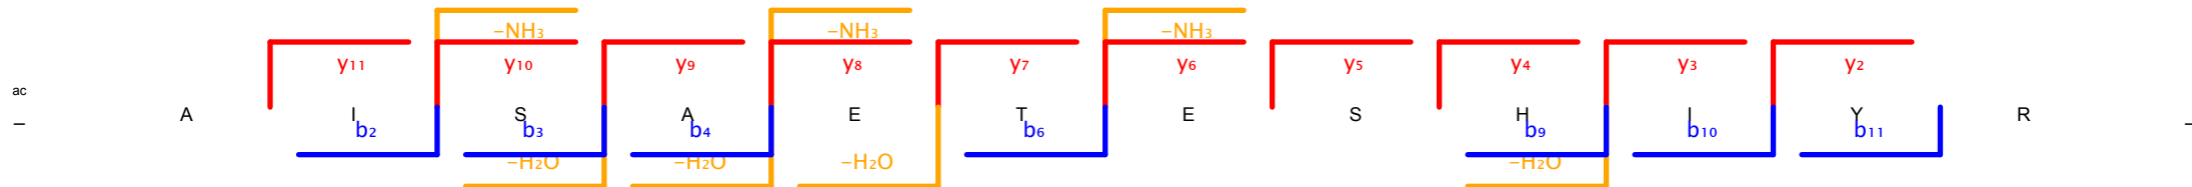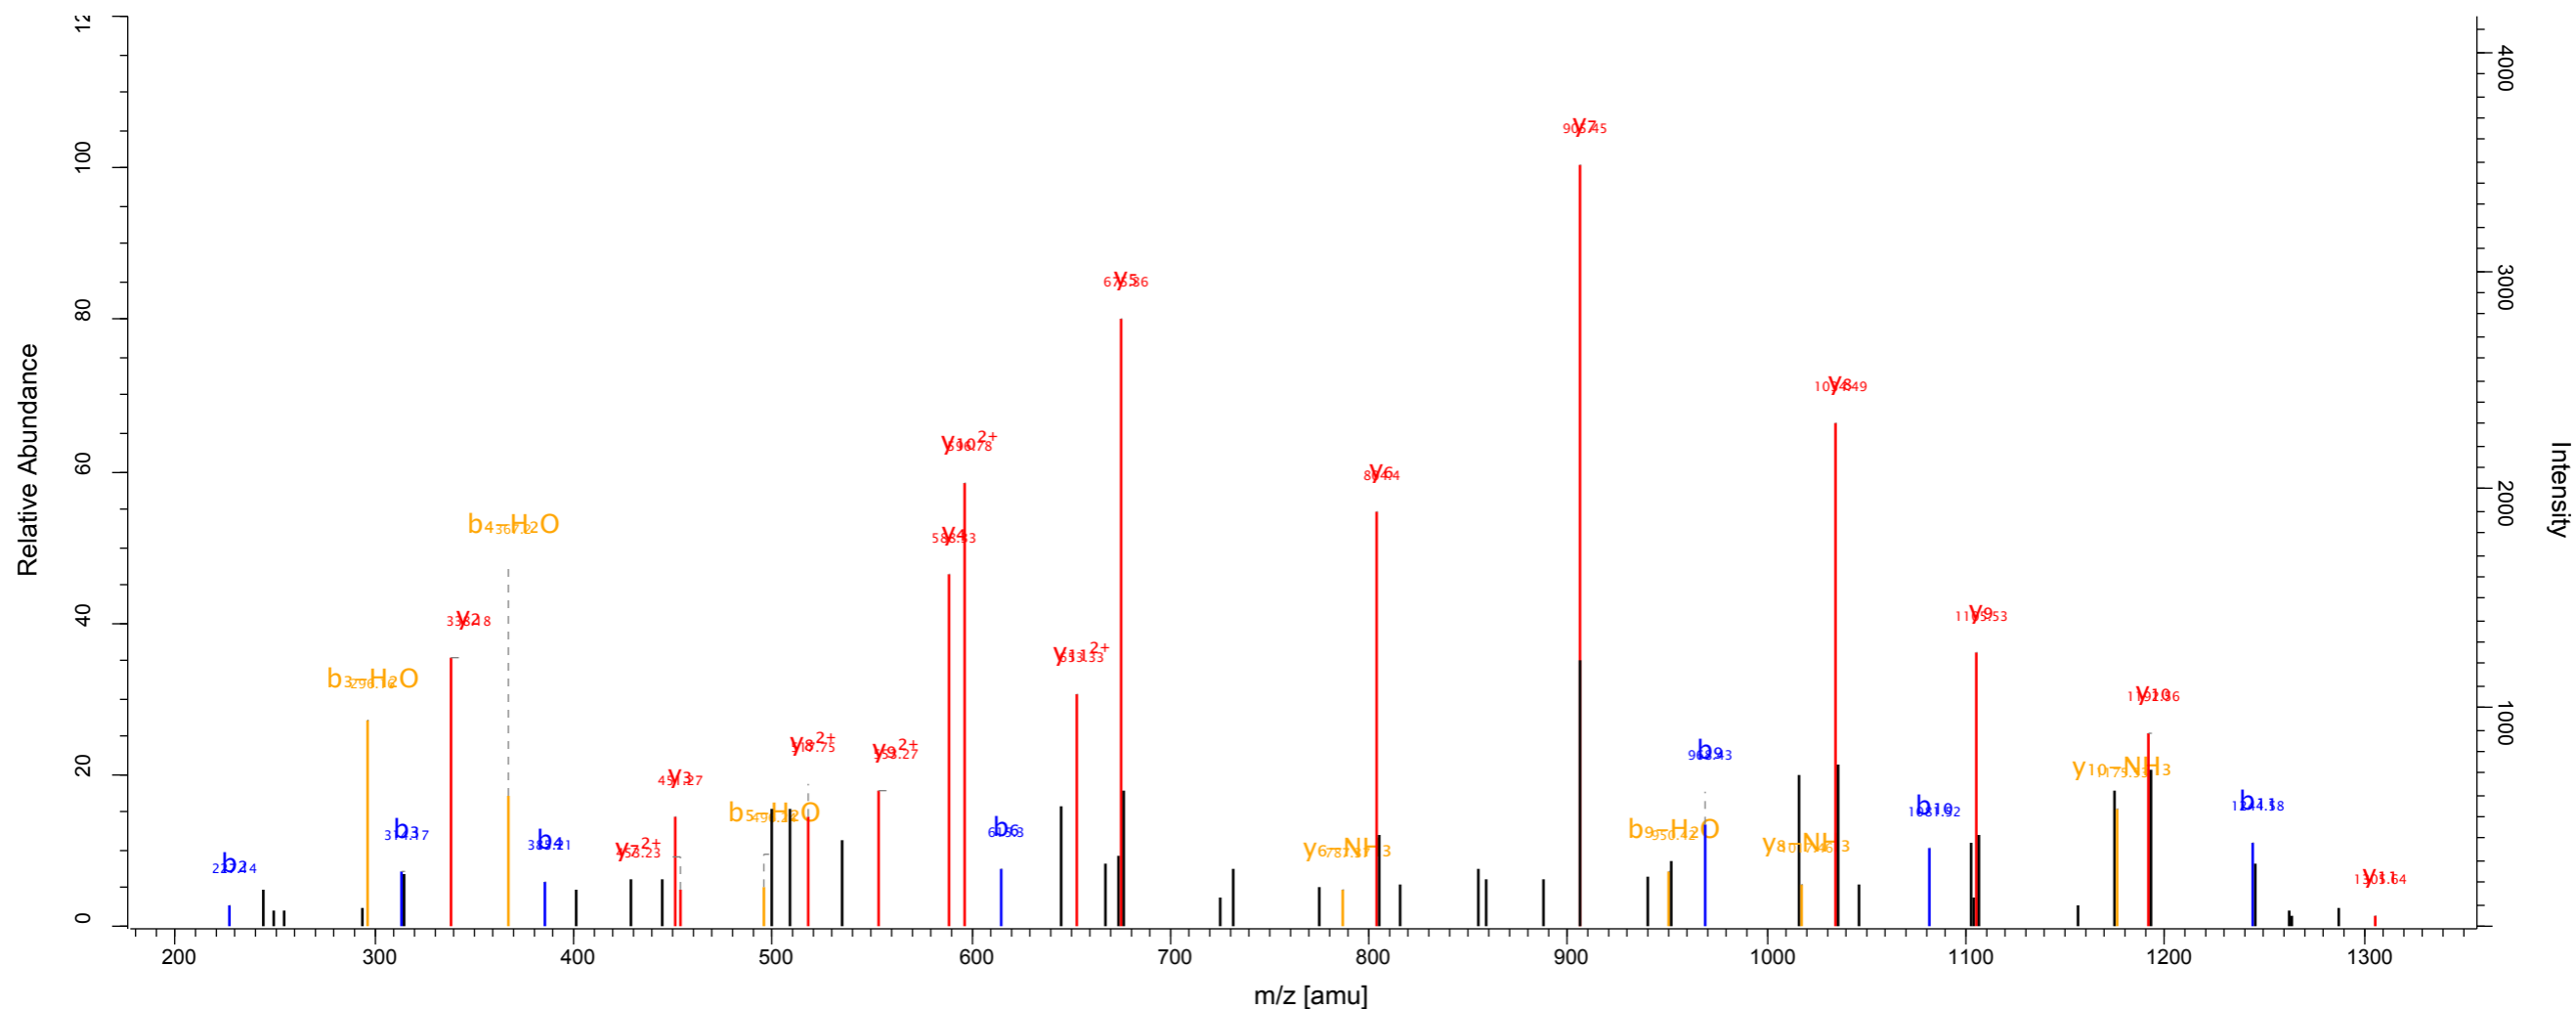

precursor information

|                   |                  |
|-------------------|------------------|
| Mass:             | 1417.68380       |
| m/z:              | 700.84022        |
| Charge:           | 2+               |
| Retentiontime:    | 52.3730040132301 |
| Score:            | 208.3321         |
| Mass Error [ppm]: | 0.080027         |
| PEP:              | 1.7044E-18       |
| Precursor Type:   | MULTI            |

general information

|                       |          |
|-----------------------|----------|
| Annotation:           | 10 of 12 |
| AminoAcids Coverage:  | 82 %     |
| Intensity Coverage:   | 67 %     |
| Peak Coverage:        | 43 %     |
| Protein Localisation: | 2 ... 13 |

| b ion      |                |    |     |    | y ion          |            | y <sup>2+</sup> ion |            |
|------------|----------------|----|-----|----|----------------|------------|---------------------|------------|
| Δ dalton   | mass           |    | seq |    | Δ dalton       | mass       | Δ dalton            | mass       |
|            | 114.054954941  | 1  | A   | 11 |                |            |                     |            |
| +0.0319406 | 227.139018921  | 2  | I   | 10 | 1305.643355817 | +0.0141149 | 653.325316142       | +0.2420056 |
| -0.0852929 | 314.171047331  | 3  | S   | 9  | 1192.559291836 | -0.1073875 | 596.783284151       | +0.2053633 |
| -0.0420845 | 385.208161119  | 4  | A   | 8  | 1105.527263426 | -0.0023611 | 553.267269946       | +0.4138214 |
|            | 514.250754215  | 5  | E   | 7  | 1034.490149639 | -0.0303108 | 517.748713053       | +0.0050711 |
| -0.0050367 | 615.298432689  | 6  | T   | 6  | 905.447556542  | -0.0676737 | 453.227416504       | +0.309876  |
|            | 744.341025785  | 7  | E   | 5  | 804.399878068  | -0.0509401 | 804.399878068       |            |
|            | 831.373054195  | 8  | S   | 4  | 675.357284972  | +0.0285183 | 675.357284972       |            |
| -0.0645955 | 968.431966058  | 9  | H   | 3  | 588.325256562  | -0.1790163 | 588.325256562       |            |
| -0.2524802 | 1081.516030038 | 10 | I   | 2  | 451.2663447    | +0.052564  | 451.2663447         |            |
| -0.0872931 | 1244.579358576 | 11 | Y   | 1  | 338.182280719  | +0.0907906 | 338.182280719       |            |
|            |                | 12 | R   | 0  | 175.118952181  |            | 175.118952181       |            |

Scan number 5803 Raw file 20091025\_Orbi6\_MaHe\_SA\_ADH\_exp3\_Matr\_dil\_Gel03  
 Method ITMS; CID Genenames N6AMT2

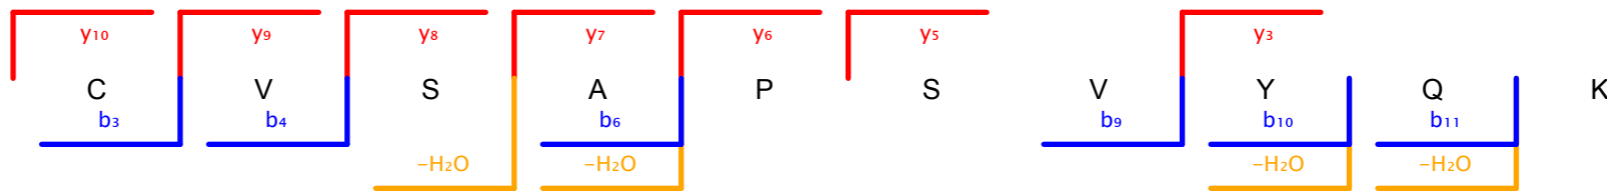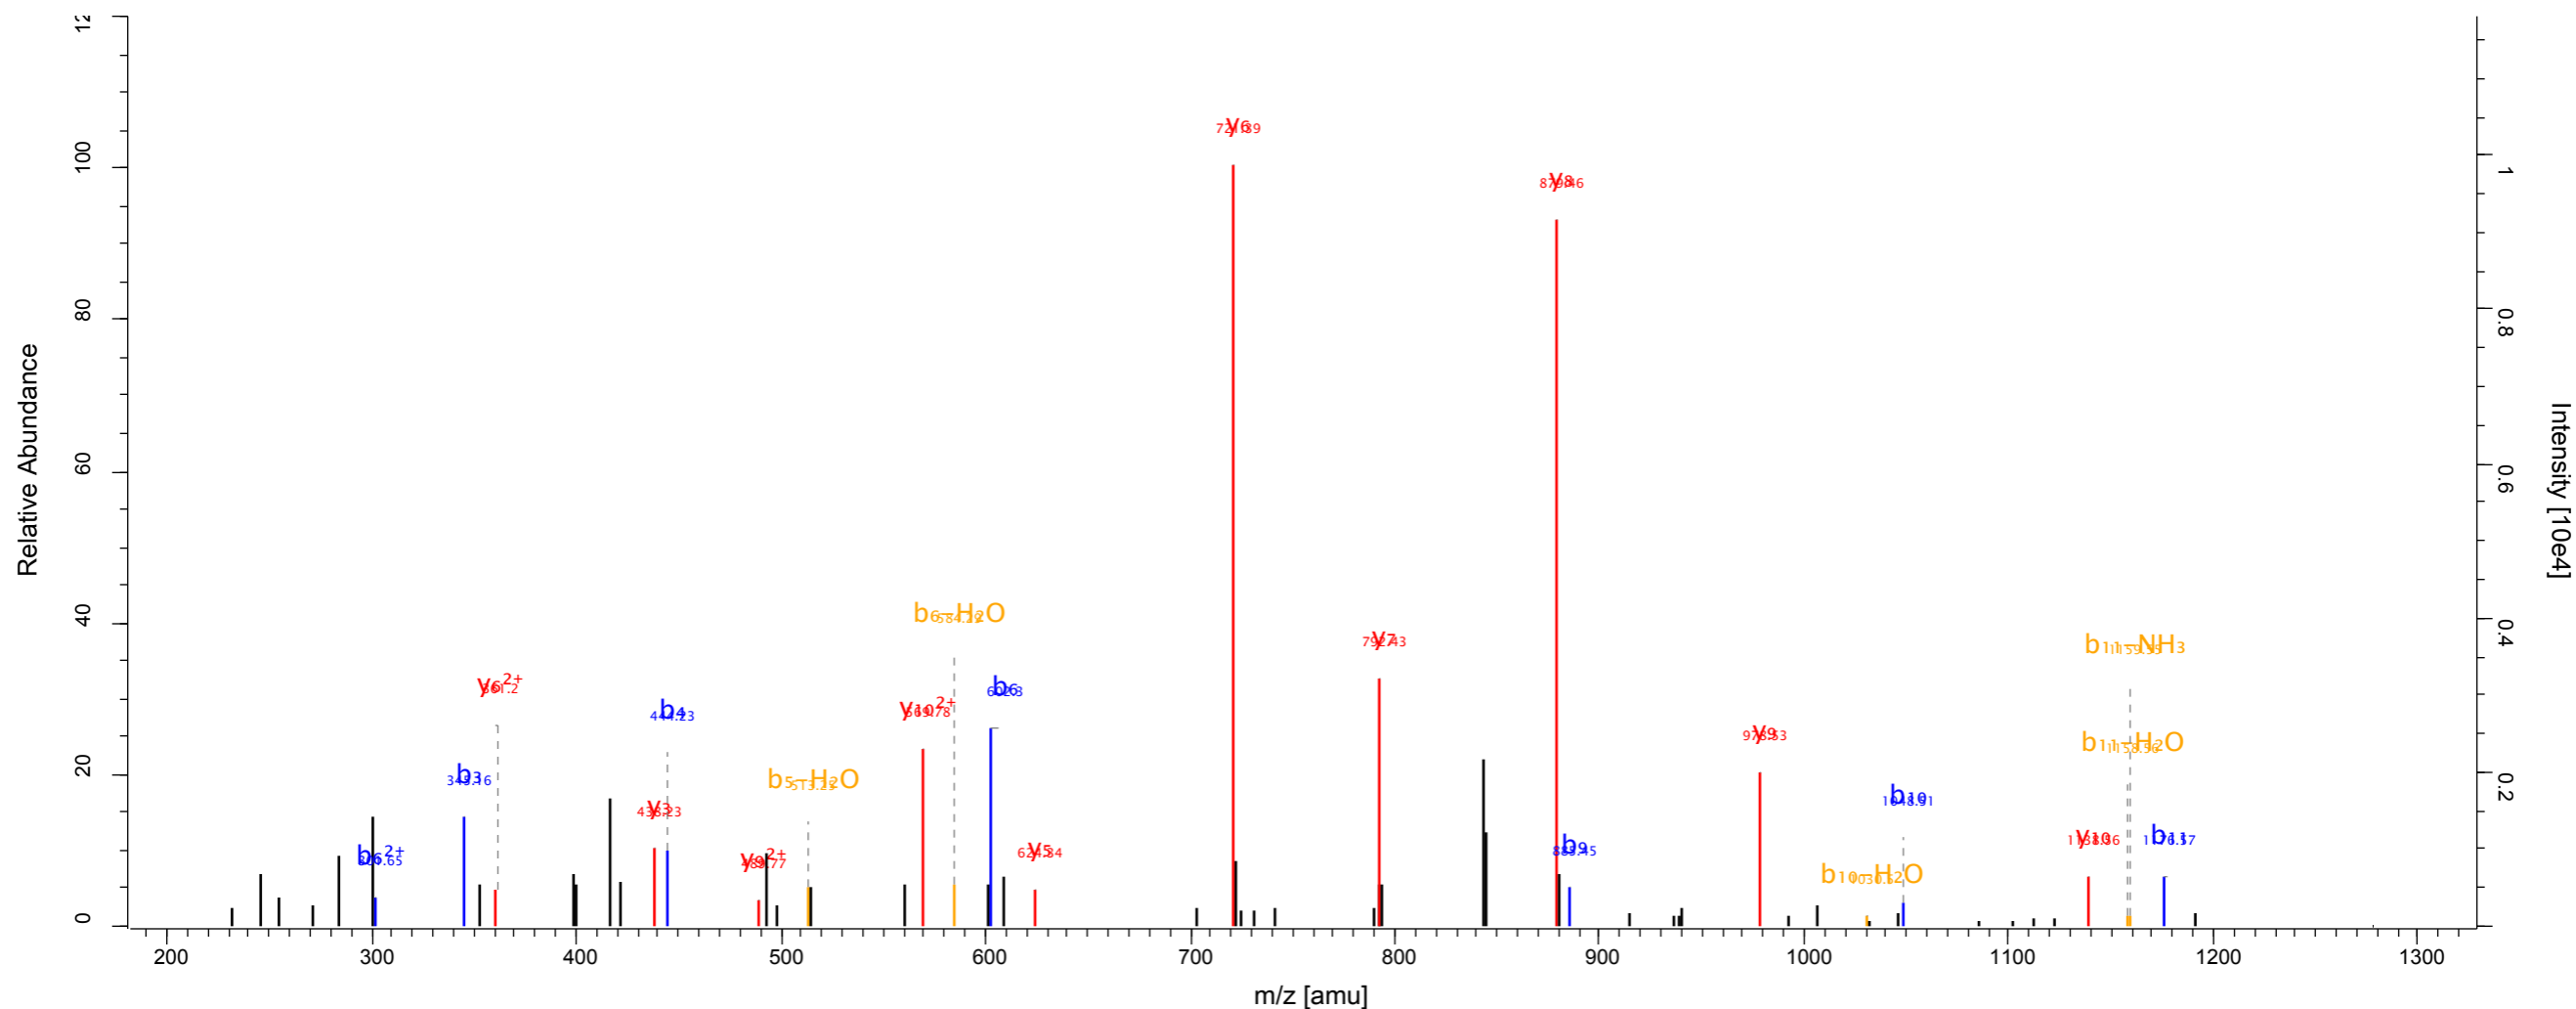

precursor information

|                   |                  |
|-------------------|------------------|
| Mass:             | 1221.66072       |
| m/z:              | 661.84212        |
| Charge:           | 2+               |
| Retentiontime:    | 42.4288230078125 |
| Score:            | 150.1022         |
| Mass Error [ppm]: | -0.23184         |
| PEP:              | 1.7144E-05       |
| Precursor Type:   | MULTI            |

general information

|                       |           |
|-----------------------|-----------|
| Annotation:           | 0 of 12   |
| AminoAcids Coverage:  | 75 %      |
| Intensity Coverage:   | 65 %      |
| Peak Coverage:        | 24 %      |
| Protein Localisation: | 77 ... 88 |

| b <sup>2+</sup> ion |              | b ion      |              |    |     |    | y ion        |            | y <sup>2+</sup> ion |            |
|---------------------|--------------|------------|--------------|----|-----|----|--------------|------------|---------------------|------------|
| Δ dalton            | mass         | Δ dalton   | mass         |    | seq |    | Δ dalton     | mass       | Δ dalton            | mass       |
|                     | 114.09134045 |            | 114.09134045 | 1  | I   | 11 |              |            |                     |            |
|                     | 185.12845423 |            | 185.12845423 | 2  | A   | 10 | 1209.5932345 |            | 1209.5932345        |            |
|                     | 345.15910244 | -0.1312704 | 345.15910244 | 3  | C   | 9  | 1138.5561207 | -0.0148609 | 569.78169859        | +0.0495392 |
|                     | 444.22751635 | -0.0997087 | 444.22751635 | 4  | V   | 8  | 978.52547251 | -0.0569667 | 489.76637449        | -0.357561  |
|                     | 531.25954476 |            | 531.25954476 | 5  | S   | 7  | 879.4570586  | -0.0486113 | 879.4570586         |            |
| +0.4268899          | 301.65196751 | +0.0932951 | 602.29665855 | 6  | A   | 6  | 792.42503019 | +0.0813785 | 792.42503019        |            |
|                     | 699.3494224  |            | 699.3494224  | 7  | P   | 5  | 721.3879164  | -0.0061415 | 361.19759643        | -0.1374768 |
|                     | 786.38145081 |            | 786.38145081 | 8  | S   | 4  | 624.33515255 | +0.0341712 | 624.33515255        |            |
|                     | 885.44986473 | -0.11881   | 885.44986473 | 9  | V   | 3  | 537.30312414 |            | 537.30312414        |            |
|                     | 1048.5131933 | -0.0423681 | 1048.5131933 | 10 | Y   | 2  | 438.23471022 | +0.0859685 | 438.23471022        |            |
|                     | 1176.5717708 | -0.195428  | 1176.5717708 | 11 | Q   | 1  | 275.17138168 |            | 275.17138168        |            |
|                     |              |            |              | 12 | K   | 0  | 147.11280417 |            | 147.11280417        |            |

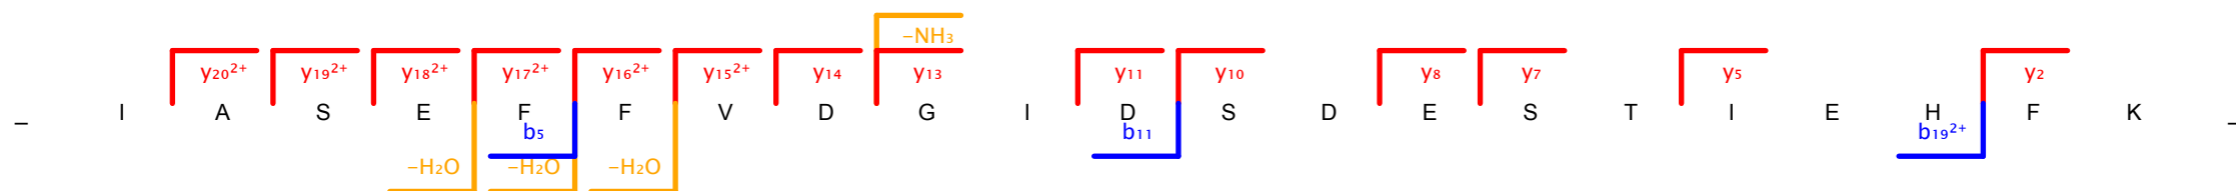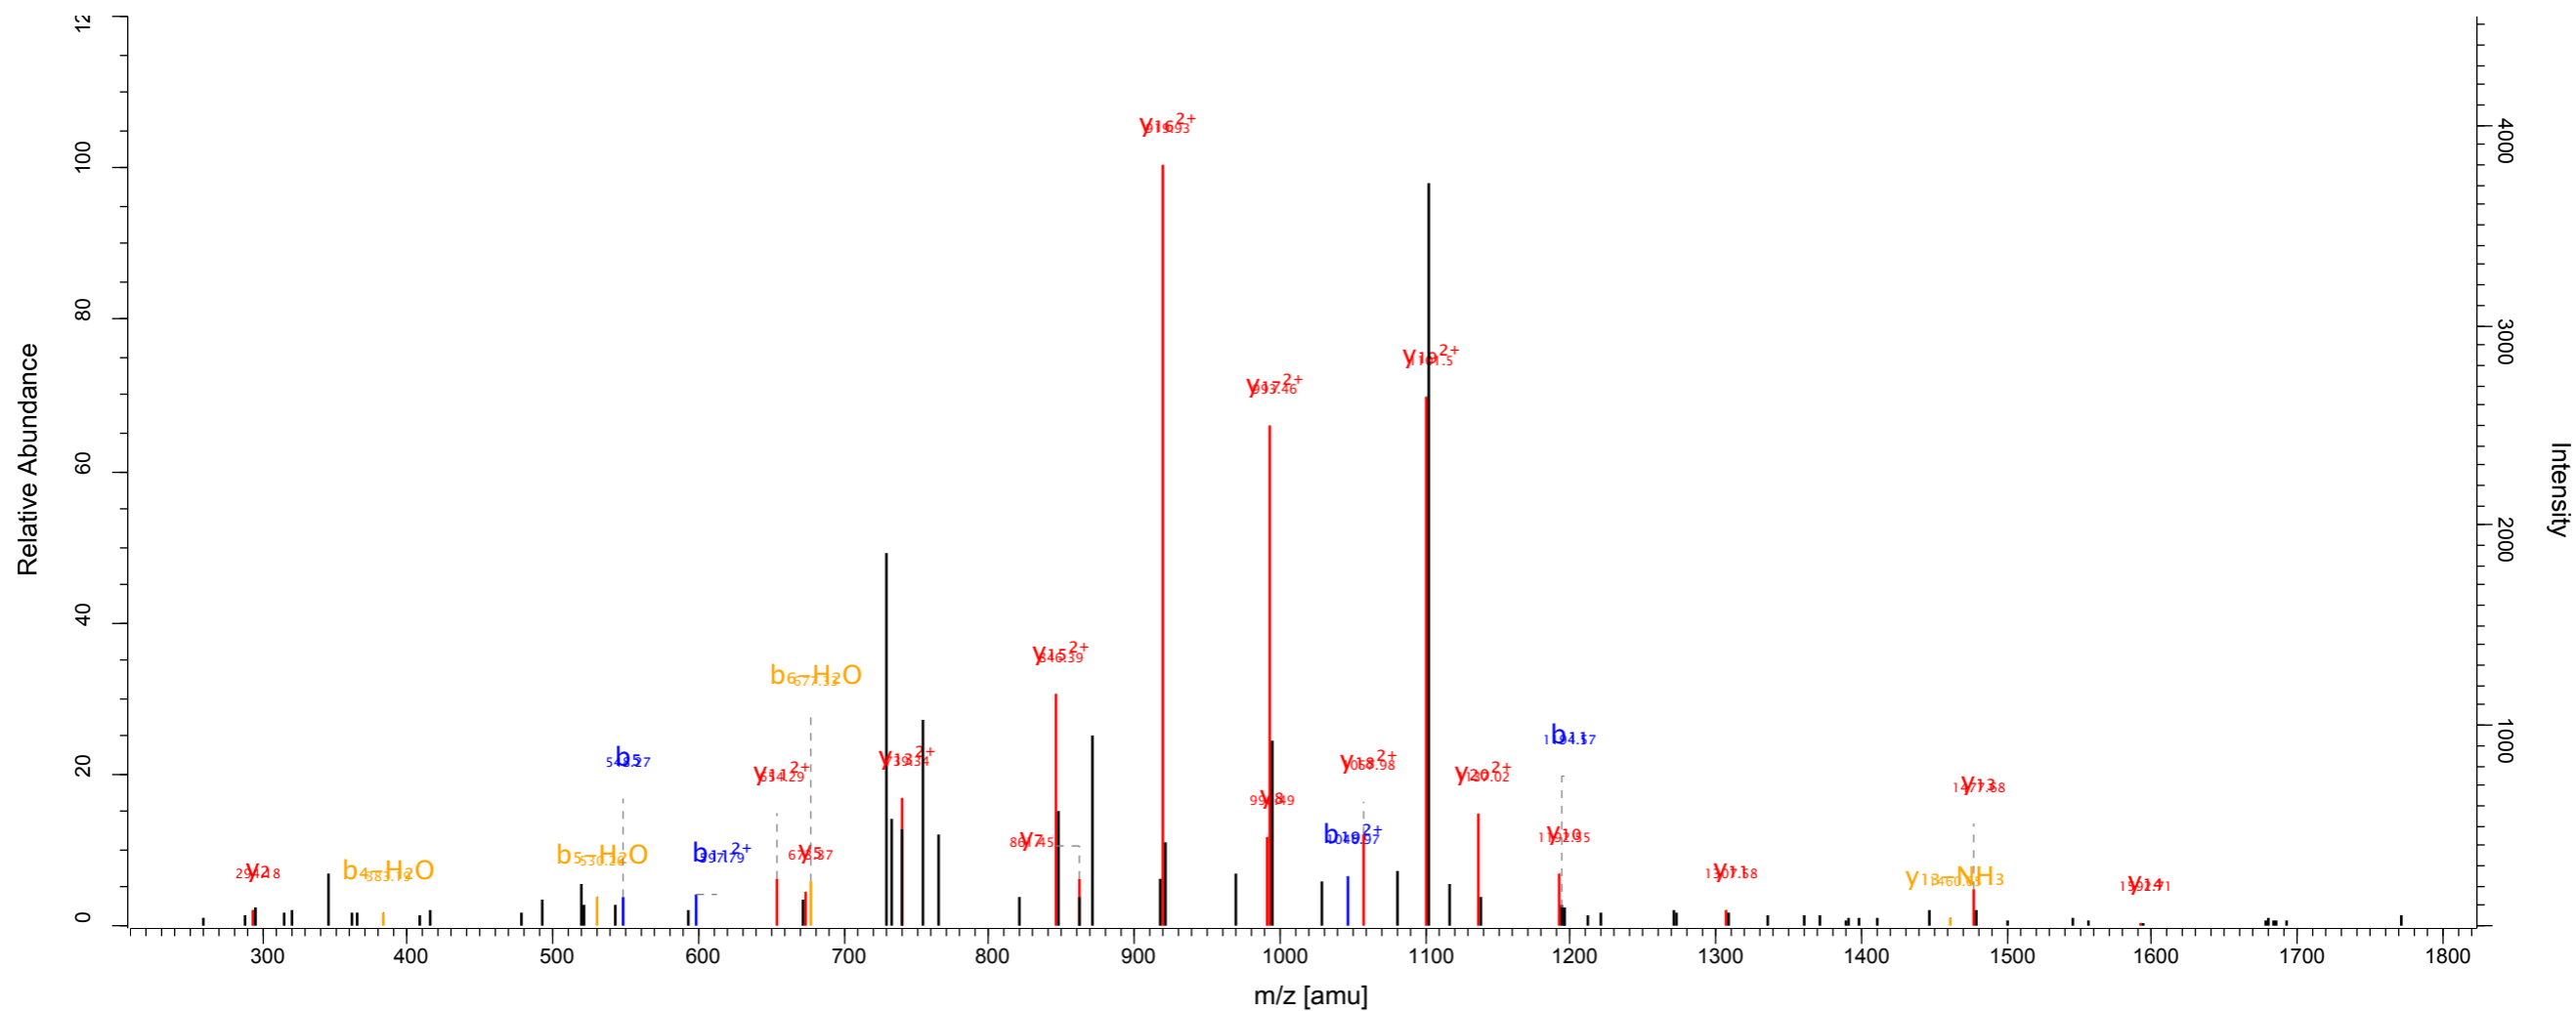

precursor information

|                   |                  |
|-------------------|------------------|
| Mass:             | 2295.10007       |
| m/z:              | 706.04002        |
| Charge:           | 2                |
| Retention time:   | 101.526802062088 |
| Score:            | 116.2475         |
| Mass Error (ppm): | 0.11245          |
| DEP:              | 7.80025e-07      |
| Precursor Type:   | ISO              |

| b <sup>2+</sup> ion |              | b ion      |              |    |     |    | y ion        |            | y <sup>2+</sup> ion |            |
|---------------------|--------------|------------|--------------|----|-----|----|--------------|------------|---------------------|------------|
| Δ dalton            | mass         | Δ dalton   | mass         |    | seq |    | Δ dalton     | mass       | Δ dalton            | mass       |
|                     | 114.09134045 |            | 114.09134045 | 1  | I   | 20 |              |            |                     |            |
|                     | 185.12845423 |            | 185.12845423 | 2  | A   | 19 | 2273.0244493 |            | 1137.0158629        | +0.0505434 |
|                     | 272.16048264 |            | 272.16048264 | 3  | S   | 18 | 2201.9873355 |            | 1101.497306         | -0.0539466 |
|                     | 401.20307574 |            | 401.20307574 | 4  | E   | 17 | 2114.9553071 |            | 1057.9812918        | +0.1575022 |
|                     | 548.27148966 | +0.2953438 | 548.27148966 | 5  | F   | 16 | 1985.912714  |            | 993.45999522        | +0.0072899 |
|                     | 695.33990357 |            | 695.33990357 | 6  | F   | 15 | 1838.8443    |            | 919.92578826        | +0.2333304 |
|                     | 794.40831749 |            | 794.40831749 | 7  | V   | 14 | 1691.7758861 |            | 846.3915813         | -0.0035808 |
|                     | 909.43526052 |            | 909.43526052 | 8  | D   | 13 | 1592.7074722 | +0.1049057 | 1592.7074722        |            |
|                     | 966.45672425 |            | 966.45672425 | 9  | G   | 12 | 1477.6805292 | -0.121203  | 739.34390283        | -0.1056826 |
|                     | 1079.5407882 |            | 1079.5407882 | 10 | I   | 11 | 1420.6590655 |            | 1420.6590655        |            |
| +0.1854576          | 597.78750386 | +0.1778742 | 1194.5677313 | 11 | D   | 10 | 1307.5750015 | -0.1610611 | 654.29113897        | +0.0960681 |
|                     | 1281.5997597 |            | 1281.5997597 | 12 | S   | 9  | 1192.5480584 | -0.2482538 | 1192.5480584        |            |
|                     | 1396.6267027 |            | 1396.6267027 | 13 | D   | 8  | 1105.51603   |            | 1105.51603          |            |
|                     | 1525.6692958 |            | 1525.6692958 | 14 | E   | 7  | 990.48908701 | -0.1169557 | 990.48908701        |            |
|                     | 1612.7013242 |            | 1612.7013242 | 15 | S   | 6  | 861.44649391 | -0.1179417 | 861.44649391        |            |
|                     | 1713.7490027 |            | 1713.7490027 | 16 | T   | 5  | 774.4144655  |            | 774.4144655         |            |
|                     | 1826.8330667 |            | 1826.8330667 | 17 | I   | 4  | 673.36678703 | +0.1747779 | 673.36678703        |            |
|                     | 1955.8756598 |            | 1955.8756598 | 18 | E   | 3  | 560.28272305 |            | 560.28272305        |            |
| +0.1974109          | 1046.970924  |            | 2092.9345716 | 19 | H   | 2  | 431.24012995 |            | 431.24012995        |            |
|                     | 2240.0029855 |            | 2240.0029855 | 20 | F   | 1  | 294.18121809 | +0.122737  | 294.18121809        |            |
|                     |              |            |              | 21 | K   | 0  | 147.11280417 |            | 147.11280417        |            |

general information

|                       |             |
|-----------------------|-------------|
| Annotation:           | 15 of 21    |
| AminoAcids Coverage:  | 71 %        |
| Intensity Coverage:   | 48 %        |
| Peak Coverage:        | 28 %        |
| Protein Localisation: | 129 ... 149 |

Scan number 4639 Raw file 20091025\_Orbi6\_MaHe\_SA\_ADH\_exp3\_Matr\_dil\_Gel04  
 Method ITMS; CID Genenames CYBRD1

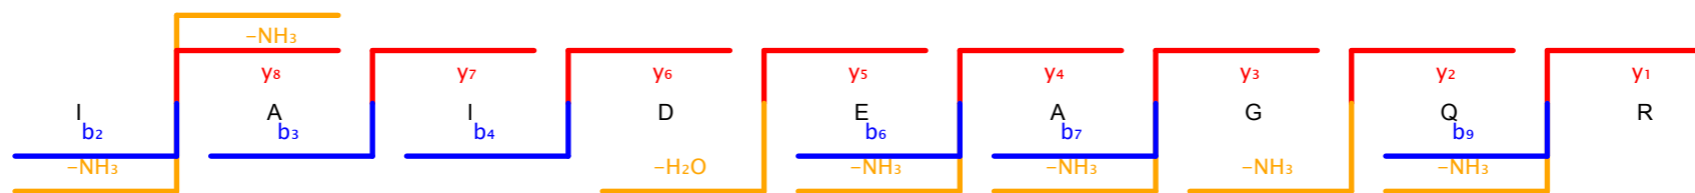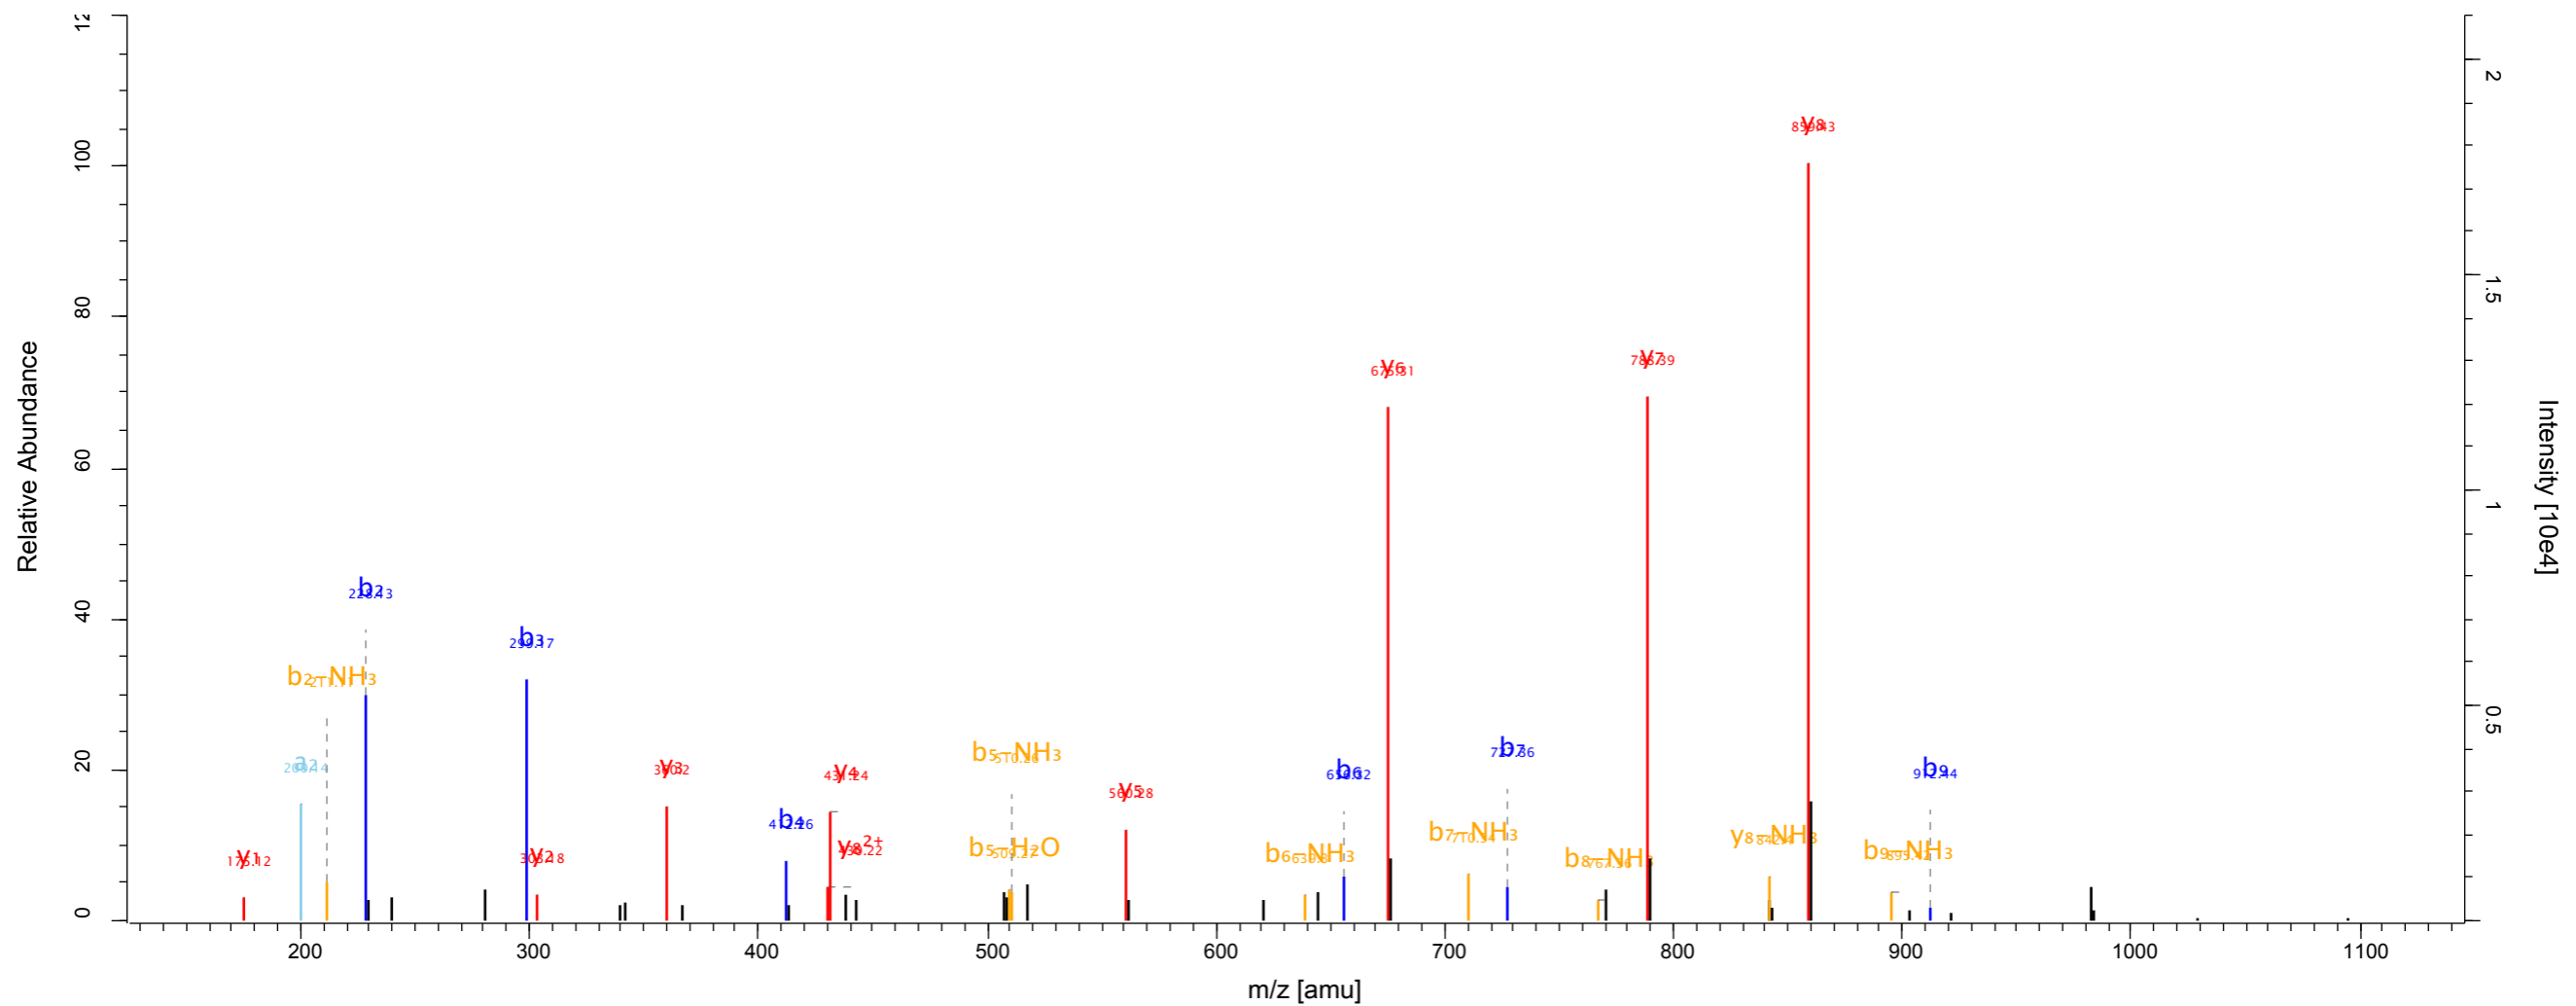

precursor information

|                   |                  |
|-------------------|------------------|
| Mass:             | 1085.54632       |
| m/z:              | 543.78044        |
| Charge:           | 2+               |
| Retention time:   | 26.8138580322266 |
| Score:            | 187.6438         |
| Mass Error (ppm): | -0.19022         |
| DED:              | 3.1260E-08       |
| Precursor Type:   | MULTI            |

96 precursor information

|                       |             |
|-----------------------|-------------|
| Annotation:           | 0 of 10     |
| AminoAcids Coverage:  | 90%         |
| Intensity Coverage:   | 82%         |
| Peak Coverage:        | 47%         |
| Protein Localisation: | 274 ... 283 |

| a ion      |              | b ion      |              |    |     |   | y ion        |            | y <sup>2+</sup> ion |            |
|------------|--------------|------------|--------------|----|-----|---|--------------|------------|---------------------|------------|
| Δ dalton   | mass         | Δ dalton   | mass         |    | seq |   | Δ dalton     | mass       | Δ dalton            | mass       |
|            | 87.055289292 |            | 115.05020391 | 1  | N   | 9 |              |            |                     |            |
| +0.0809684 | 200.13935327 | +0.0056247 | 228.13426789 | 2  | I   | 8 | 972.51088508 |            | 972.51088508        |            |
|            | 271.17646706 | -0.0255687 | 299.17138168 | 3  | A   | 7 | 859.4268211  | -0.0058616 | 430.21704878        | +0.1910323 |
|            | 384.26053104 | -0.082472  | 412.25544566 | 4  | I   | 6 | 788.38970731 | +0.0091574 | 788.38970731        |            |
|            | 499.28747407 |            | 527.28238869 | 5  | D   | 5 | 675.30564333 | +0.0307824 | 675.30564333        |            |
|            | 628.33006717 | +0.014923  | 656.32498179 | 6  | E   | 4 | 560.2787003  | +0.0569931 | 560.2787003         |            |
|            | 699.36718096 | -0.213597  | 727.36209558 | 7  | A   | 3 | 431.2361072  | +0.0781628 | 431.2361072         |            |
|            | 756.38864468 |            | 784.3835593  | 8  | G   | 2 | 360.19899342 | -0.0255315 | 360.19899342        |            |
|            | 884.44722219 | +0.0156879 | 912.44213681 | 9  | Q   | 1 | 303.17752969 | +0.1316134 | 303.17752969        |            |
|            |              |            |              | 10 | R   | 0 | 175.11895218 | +0.1168114 | 175.11895218        |            |

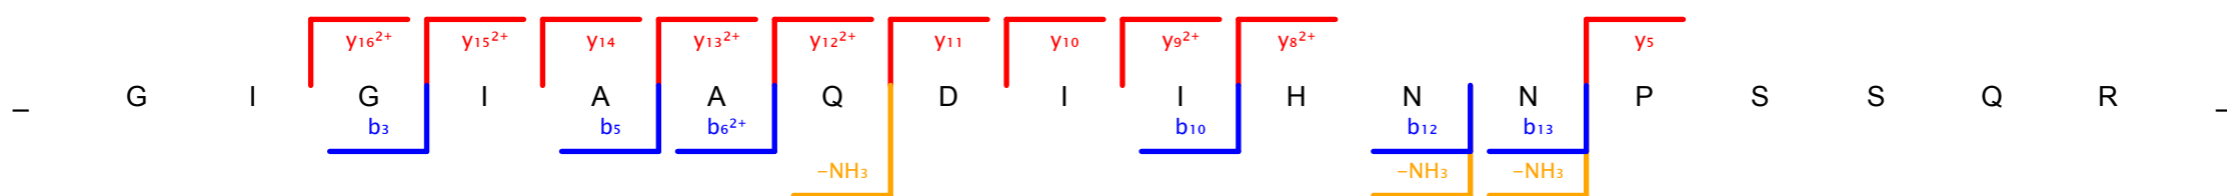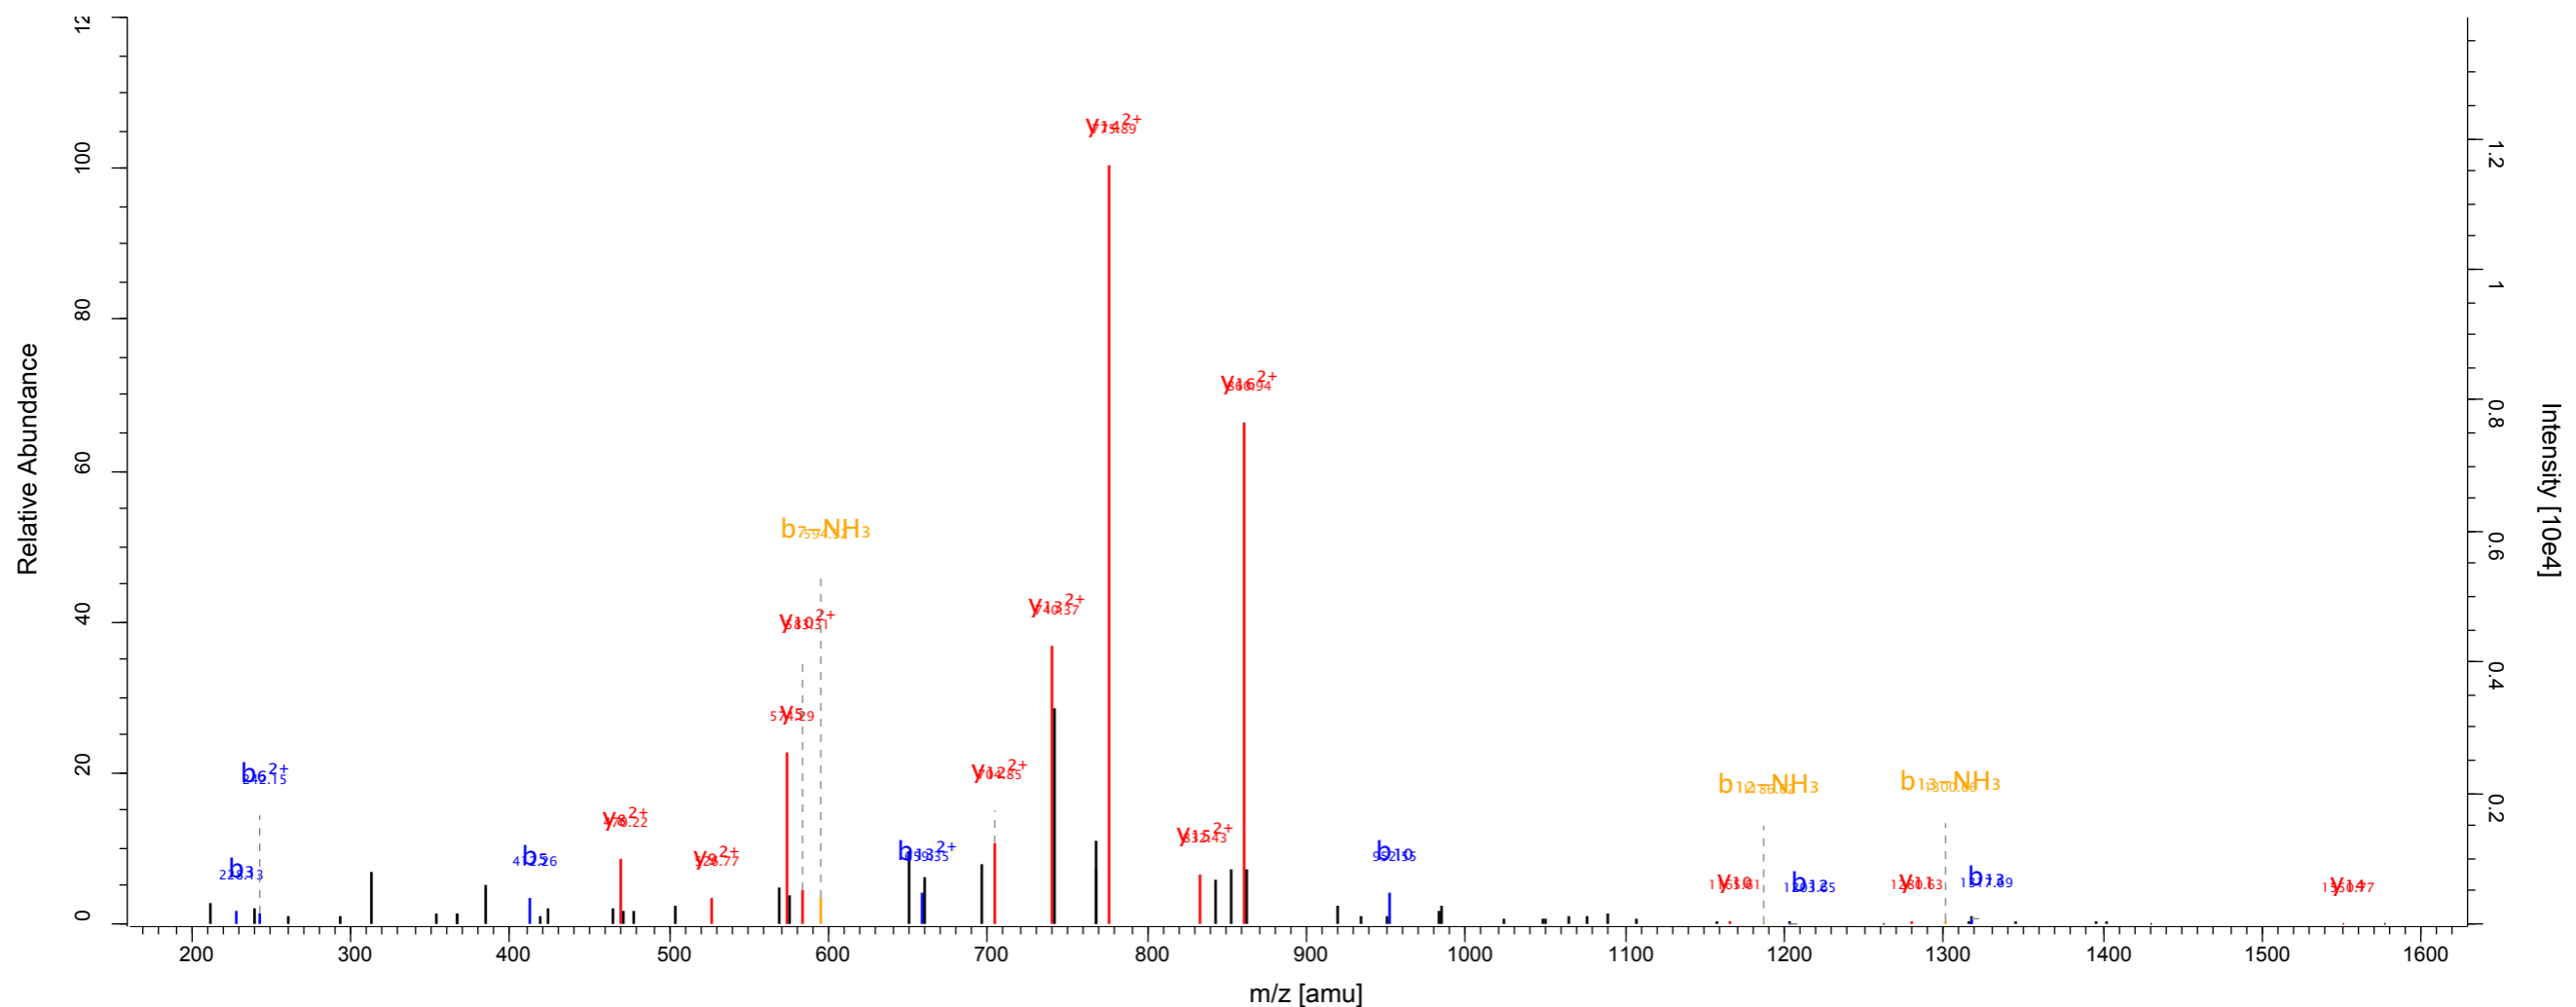

precursor information

|                   |                  |
|-------------------|------------------|
| Mass:             | 1880.06072       |
| m/z:              | 620.00718        |
| Charge:           | 2+               |
| Retention time:   | 61.4076104763184 |
| Score:            | 110.438          |
| Mass Error (ppm): | 0.55526          |
| DEP:              | 5.8862506        |
| Precursor Type:   | MULTI            |

| b <sup>2+</sup> ion |              | b ion      |              |    |     |    | y ion        |            | y <sup>2+</sup> ion |            |
|---------------------|--------------|------------|--------------|----|-----|----|--------------|------------|---------------------|------------|
| Δ dalton            | mass         | Δ dalton   | mass         |    | seq |    | Δ dalton     | mass       | Δ dalton            | mass       |
|                     | 58.02874019  |            | 58.02874019  | 1  | G   | 17 |              |            |                     |            |
|                     | 171.11280417 |            | 171.11280417 | 2  | I   | 16 | 1833.9565849 |            | 1833.9565849        |            |
|                     | 228.13426789 | +0.0498141 | 228.13426789 | 3  | G   | 15 | 1720.8725209 |            | 860.93989869        | +0.1736877 |
|                     | 341.21833187 |            | 341.21833187 | 4  | I   | 14 | 1663.8510572 |            | 832.42916682        | -0.0610638 |
|                     | 412.25544566 | -0.0110609 | 412.25544566 | 5  | A   | 13 | 1550.7669932 | +0.0522207 | 775.88713483        | +0.1829335 |
| -0.0178074          | 242.14991796 |            | 483.29255945 | 6  | A   | 12 | 1479.7298794 |            | 740.36857794        | -0.0252552 |
|                     | 611.35113696 |            | 611.35113696 | 7  | Q   | 11 | 1408.6927656 |            | 704.85002105        | +0.0228427 |
|                     | 726.37807999 |            | 726.37807999 | 8  | D   | 10 | 1280.6341881 | -0.2700524 | 1280.6341881        |            |
|                     | 839.46214397 |            | 839.46214397 | 9  | I   | 9  | 1165.6072451 | +0.0963682 | 583.30726077        | +0.107351  |
|                     | 952.54620795 | -0.0891767 | 952.54620795 | 10 | I   | 8  | 1052.5231811 |            | 526.76522878        | +0.2294001 |
|                     | 1089.6051198 |            | 1089.6051198 | 11 | H   | 7  | 939.43911712 |            | 470.22319679        | +0.0230801 |
|                     | 1203.6480473 | +0.2348873 | 1203.6480473 | 12 | N   | 6  | 802.38020526 |            | 802.38020526        |            |
| -0.0706832          | 659.34912559 | +0.2935224 | 1317.6909747 | 13 | N   | 5  | 688.33727781 |            | 688.33727781        |            |
|                     | 1414.7437386 |            | 1414.7437386 | 14 | P   | 4  | 574.29435036 | +0.0232156 | 574.29435036        |            |
|                     | 1501.775767  |            | 1501.775767  | 15 | S   | 3  | 477.24158651 |            | 477.24158651        |            |
|                     | 1588.8077954 |            | 1588.8077954 | 16 | S   | 2  | 390.2095581  |            | 390.2095581         |            |
|                     | 1716.8663729 |            | 1716.8663729 | 17 | Q   | 1  | 303.17752969 |            | 303.17752969        |            |
|                     |              |            |              | 18 | R   | 0  | 175.11895218 |            | 175.11895218        |            |

general information

|                       |             |
|-----------------------|-------------|
| Annotation:           | 12 of 18    |
| AminoAcids Coverage:  | 67%         |
| Intensity Coverage:   | 65%         |
| Peak Coverage:        | 21%         |
| Protein Localisation: | 208 ... 225 |

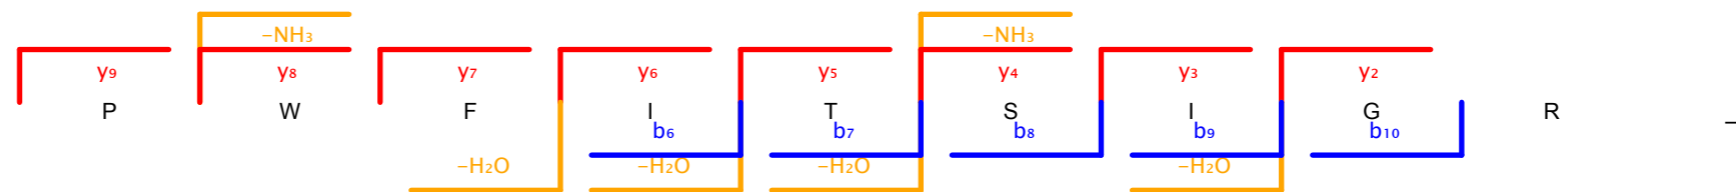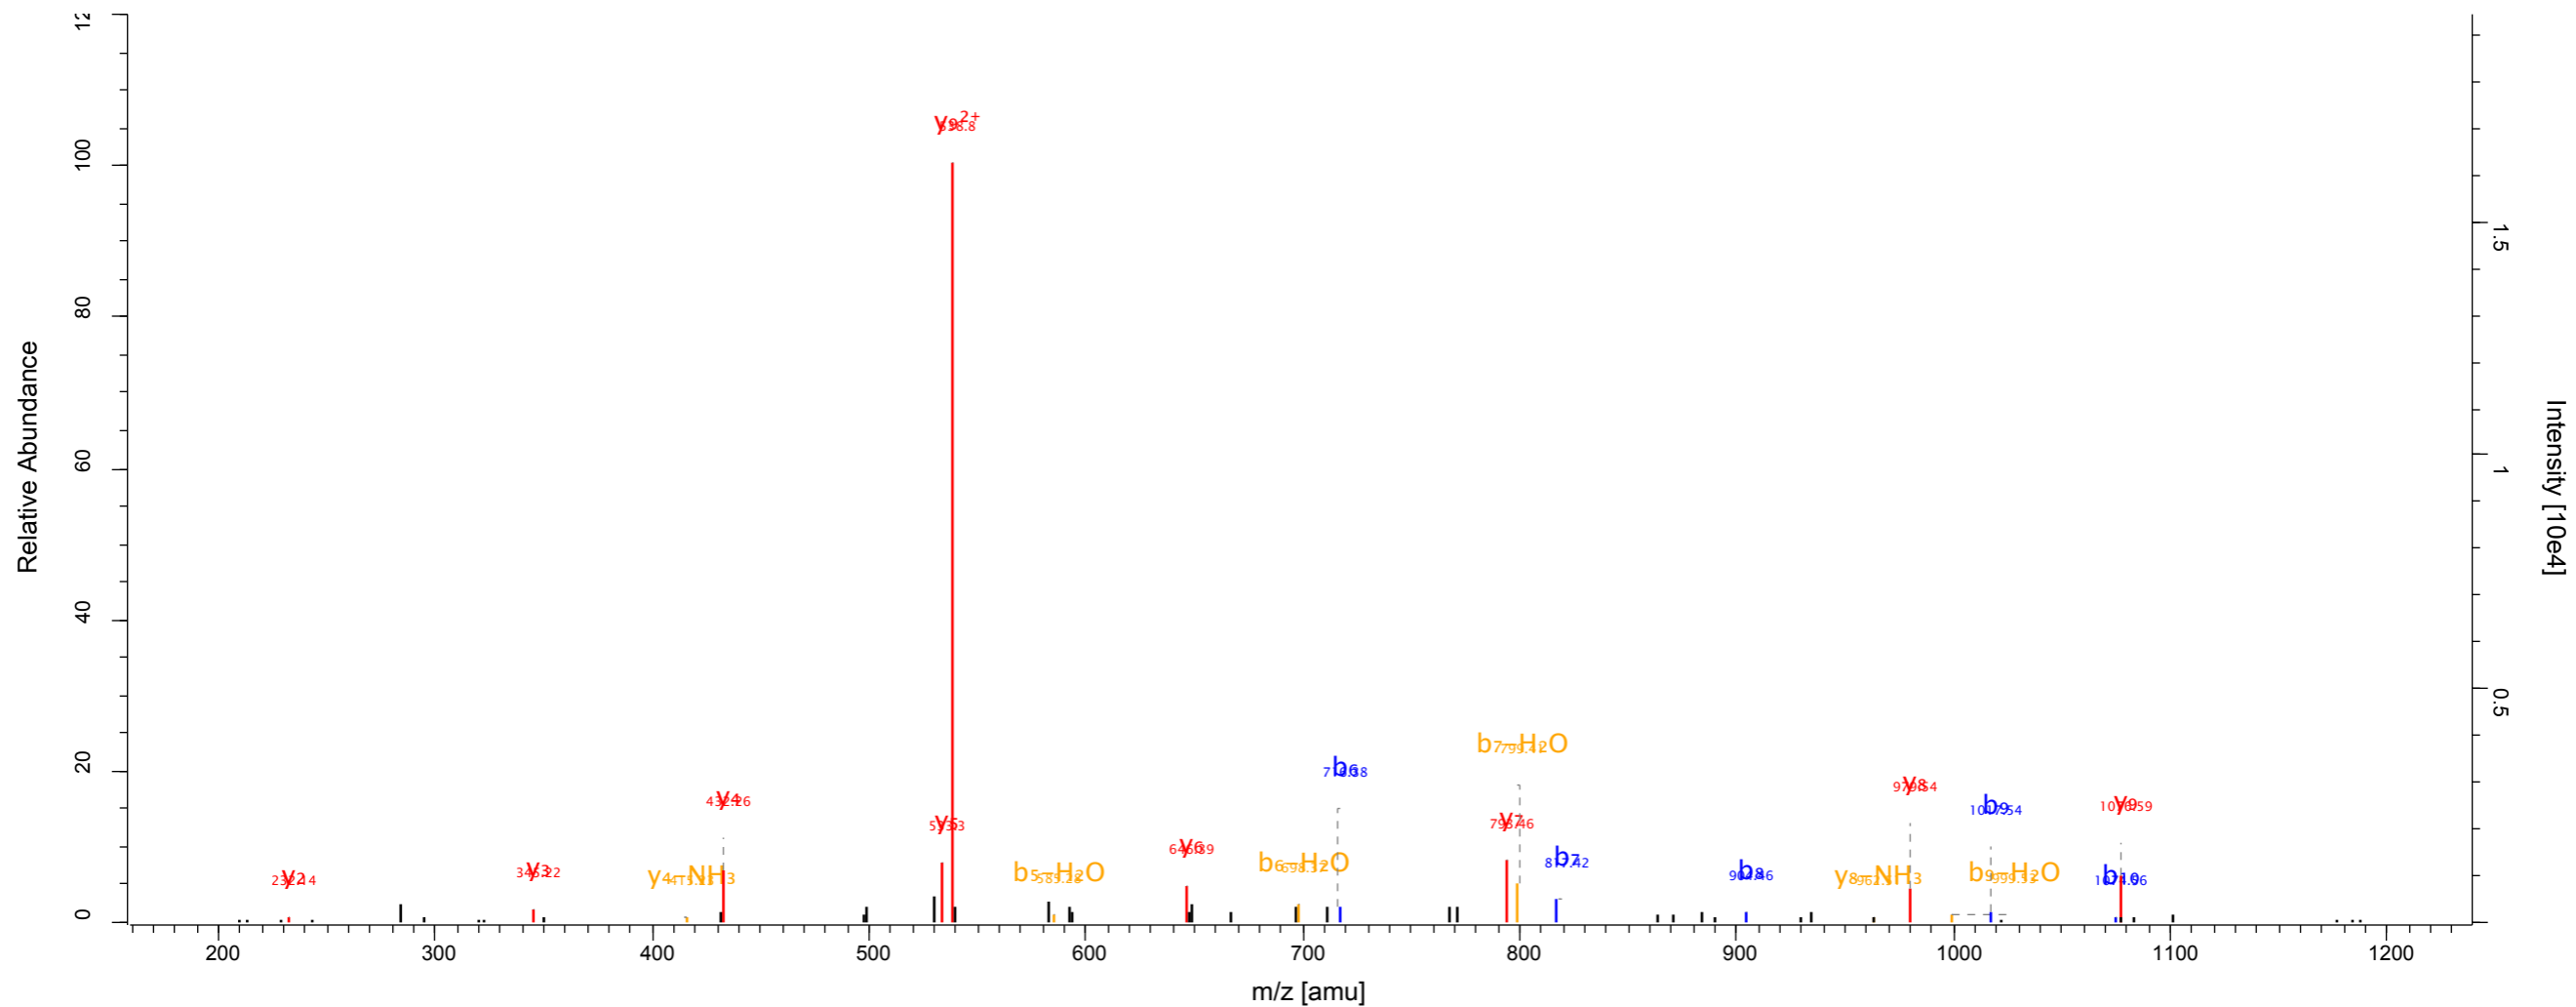

precursor information

|                   |                  |
|-------------------|------------------|
| Mass:             | 1247.66654       |
| m/z:              | 624.84055        |
| Charge:           | 2+               |
| Retention time:   | 02.5402374267578 |
| Score:            | 159.4029         |
| Mass Error (ppm): | 0.22532          |
| PEP:              | 1.146E-06        |
| Precursor Type:   | MULTI            |

general information

|                       |             |
|-----------------------|-------------|
| Annotation:           | 8 of 11     |
| AminoAcids Coverage:  | 73 %        |
| Intensity Coverage:   | 78 %        |
| Peak Coverage:        | 34 %        |
| Protein Localisation: | 292 ... 302 |

| b ion      |                |    |     |    | y ion          |            | y <sup>2+</sup> ion |            |
|------------|----------------|----|-----|----|----------------|------------|---------------------|------------|
| Δ dalton   | mass           |    | seq |    | Δ dalton       | mass       | Δ dalton            | mass       |
|            | 72.044390254   | 1  | A   | 10 |                |            |                     |            |
|            | 173.092068728  | 2  | T   | 9  | 1177.636419945 |            | 1177.636419945      |            |
|            | 270.14483258   | 3  | P   | 8  | 1076.588741471 | -0.0882532 | 538.798008969       | -0.0032702 |
|            | 456.224145534  | 4  | W   | 7  | 979.535977619  | -0.0394566 | 979.535977619       |            |
|            | 603.29255945   | 5  | F   | 6  | 793.456664666  | -0.1131588 | 793.456664666       |            |
| +0.1964357 | 716.376623431  | 6  | I   | 5  | 646.388250749  | -0.0182556 | 646.388250749       |            |
| -0.2460182 | 817.424301905  | 7  | T   | 4  | 533.304186769  | +0.0700198 | 533.304186769       |            |
| -0.1637888 | 904.456330315  | 8  | S   | 3  | 432.256508295  | +0.0871196 | 432.256508295       |            |
| -0.1410413 | 1017.540394295 | 9  | I   | 2  | 345.224479885  | -0.0746386 | 345.224479885       |            |
| -0.2310475 | 1074.561858019 | 10 | G   | 1  | 232.140415905  | -0.3349349 | 232.140415905       |            |
|            |                | 11 | R   | 0  | 175.118952181  |            | 175.118952181       |            |



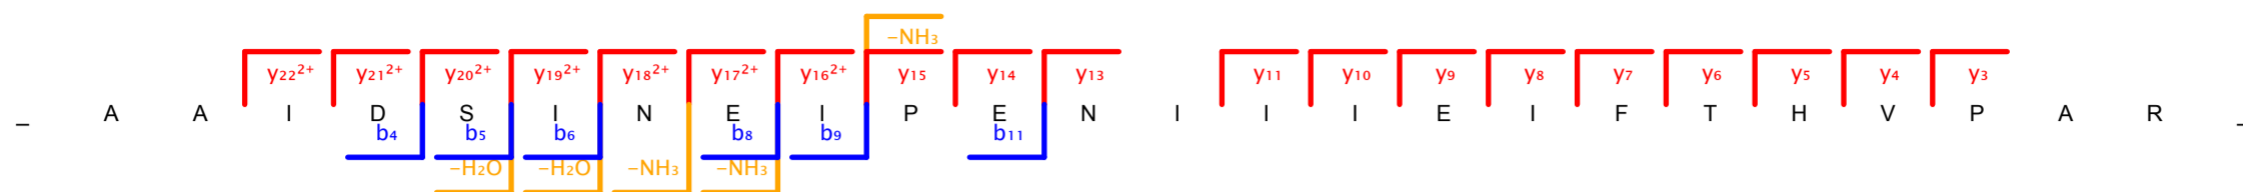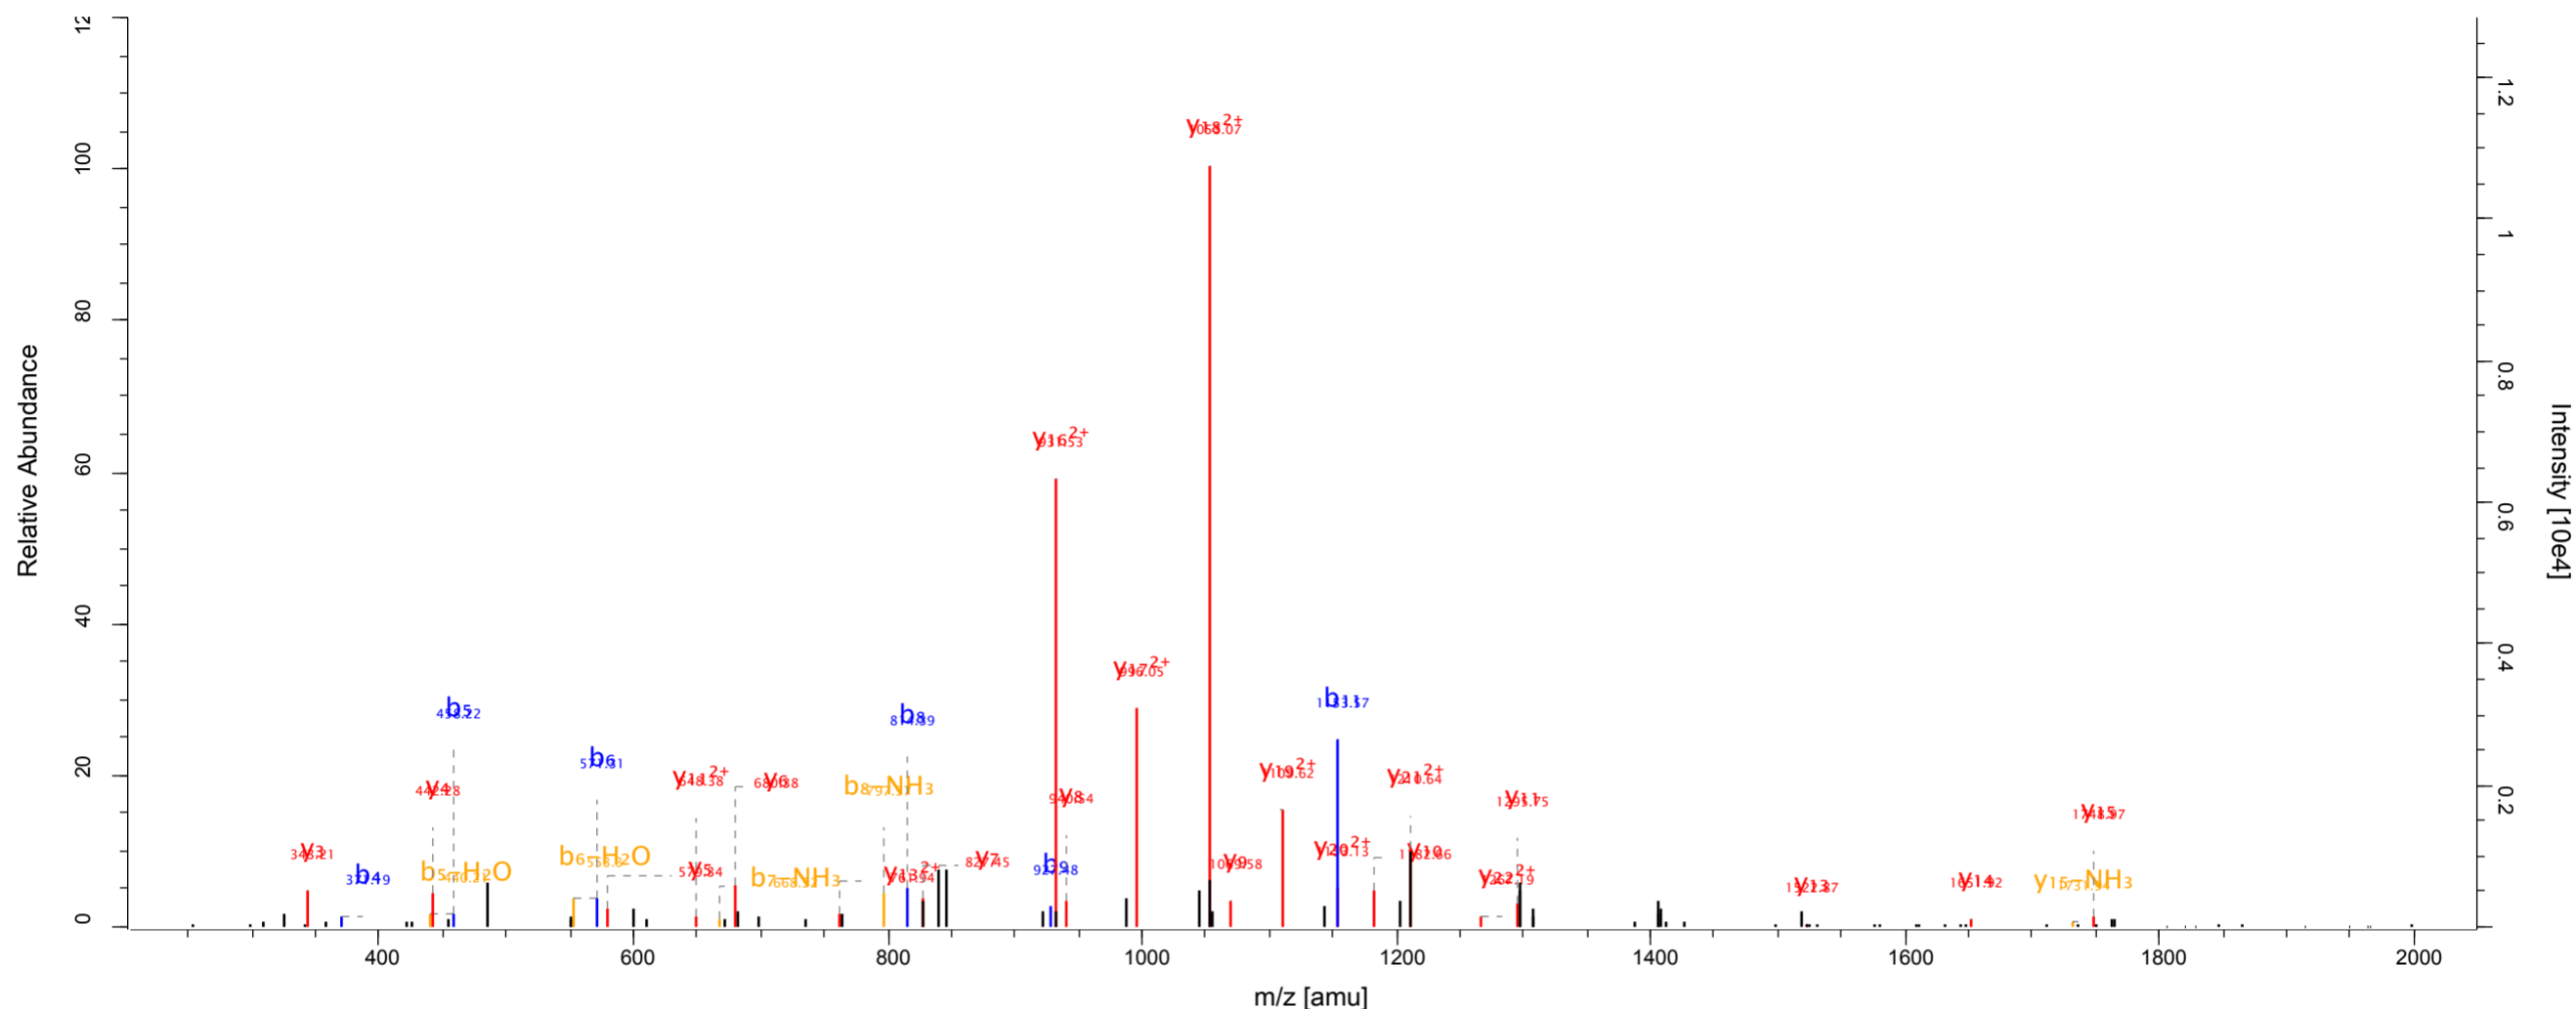

precursor information

|                   |                  |
|-------------------|------------------|
| Mass:             | 2674.12524       |
| m/z:              | 902.18560        |
| Charge:           | 2                |
| Retention time:   | 121.275120600707 |
| Score:            | 152.2406         |
| Mass Error (ppm): | 0.82152          |
| DEP:              | 5.7724E-18       |
| Precursor Type:   | ISO              |

| b ion      |                |    |     |    | y ion          |            | y <sup>2+</sup> ion |            |
|------------|----------------|----|-----|----|----------------|------------|---------------------|------------|
| Δ dalton   | mass           |    | seq |    | Δ dalton       | mass       | Δ dalton            | mass       |
|            | 72.044390254   | 1  | A   | 23 |                |            |                     |            |
|            | 143.081504042  | 2  | A   | 22 | 2604.403179117 |            | 2604.403179117      |            |
|            | 256.165568023  | 3  | I   | 21 | 2533.366065329 |            | 1267.186670898      | +0.1562246 |
| -0.0040955 | 371.192511055  | 4  | D   | 20 | 2420.282001349 |            | 1210.644638908      | -0.0952004 |
| -0.1343905 | 458.224539464  | 5  | S   | 19 | 2305.255058317 |            | 1153.131167392      | -0.3303861 |
| -0.0087377 | 571.308603445  | 6  | I   | 18 | 2218.223029907 |            | 1109.615153187      | +0.1275226 |
|            | 685.351530892  | 7  | N   | 17 | 2105.138965927 |            | 1053.073121197      | +0.1906727 |
| -0.0481157 | 814.394123988  | 8  | E   | 16 | 1991.09603848  |            | 996.051657473       | +0.1549465 |
| -0.118874  | 927.478187969  | 9  | I   | 15 | 1862.053445383 |            | 931.530360925       | +0.167454  |
|            | 1024.530951821 | 10 | P   | 14 | 1748.969381403 | -0.1206265 | 1748.969381403      |            |
| -0.0886816 | 1153.573544917 | 11 | E   | 13 | 1651.916617551 | -0.0017006 | 1651.916617551      |            |
|            | 1267.616472364 | 12 | N   | 12 | 1522.874024455 | -0.0554209 | 761.940650461       | -0.1359019 |
|            | 1380.700536344 | 13 | I   | 11 | 1408.831097008 |            | 1408.831097008      |            |
|            | 1493.784600325 | 14 | I   | 10 | 1295.747033027 | +0.0592414 | 648.377154747       | -0.1194033 |
|            | 1606.868664305 | 15 | I   | 9  | 1182.662969047 | -0.0330862 | 1182.662969047      |            |
|            | 1735.911257402 | 16 | E   | 8  | 1069.578905066 | -0.1189441 | 1069.578905066      |            |
|            | 1848.995321382 | 17 | I   | 7  | 940.536311197  | -0.0734824 | 940.536311197       |            |
|            | 1996.063735298 | 18 | F   | 6  | 827.45224799   | +0.0836407 | 827.45224799        |            |
|            | 2097.111413772 | 19 | T   | 5  | 680.383834074  | -0.0271446 | 680.383834074       |            |
|            | 2234.170325635 | 20 | H   | 4  | 579.336155599  | -0.045201  | 579.336155599       |            |
|            | 2333.238739551 | 21 | V   | 3  | 442.277243737  | +0.0267724 | 442.277243737       |            |
|            | 2430.291503403 | 22 | P   | 2  | 343.208829821  | +0.1305256 | 343.208829821       |            |
|            | 2501.328617191 | 23 | A   | 1  | 246.156065969  |            | 246.156065969       |            |
|            |                | 24 | R   | 0  | 175.118952181  |            | 175.118952181       |            |

general information

|                       |          |
|-----------------------|----------|
| Annotation:           | 10 of 24 |
| AminoAcids Coverage:  | 70%      |
| Intensity Coverage:   | 73%      |
| Peak Coverage:        | 22%      |
| Protein Localisation: | 8 ... 31 |

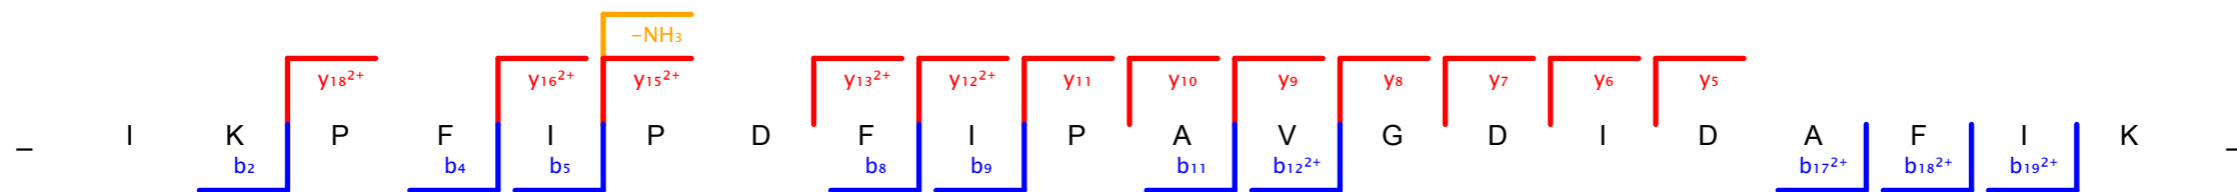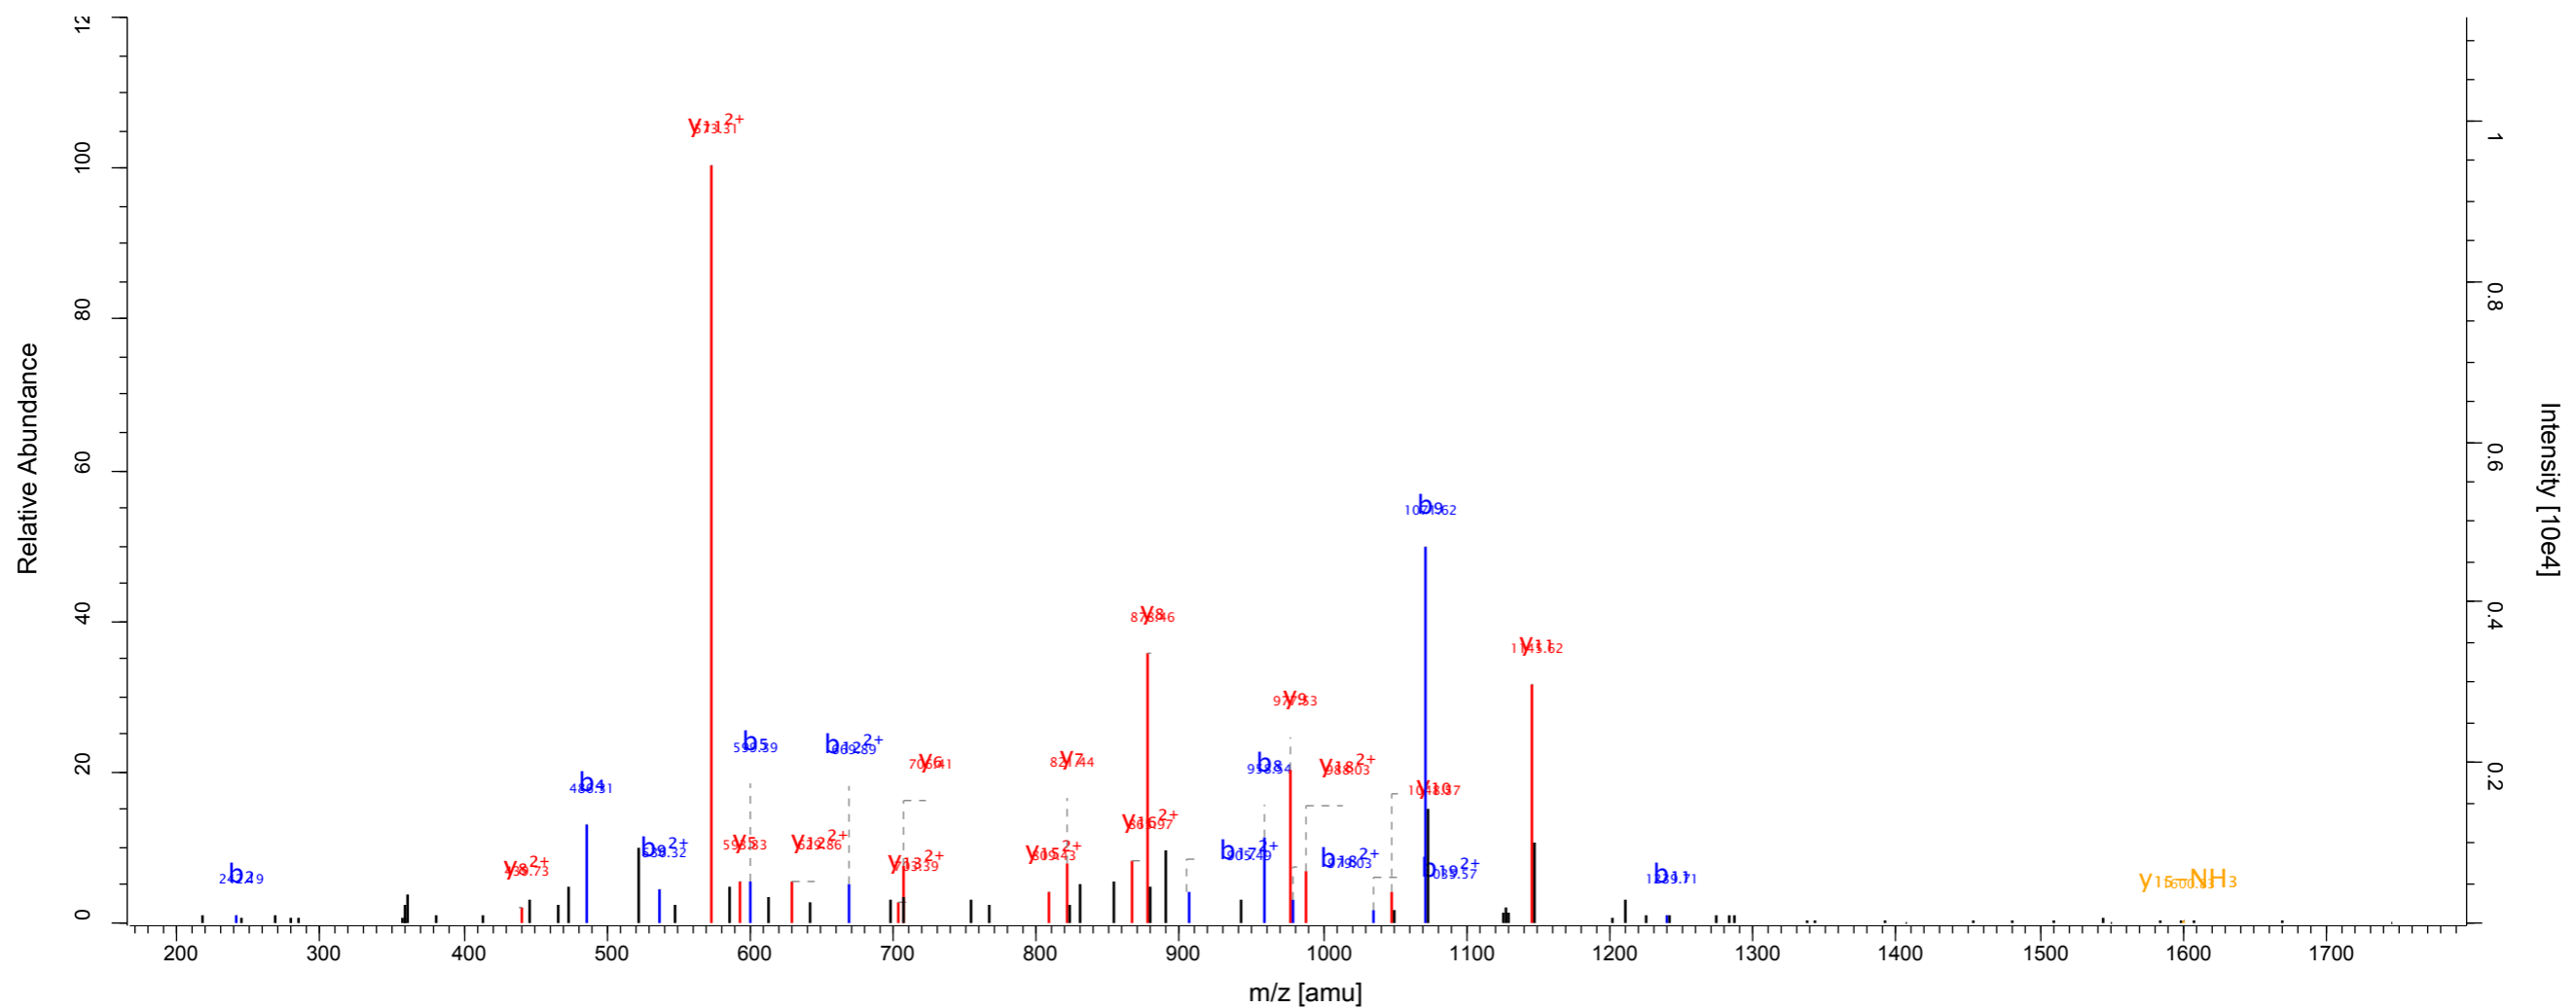

precursor information

|                   |                  |
|-------------------|------------------|
| Mass:             | 2215.22872       |
| m/z:              | 720.41685        |
| Charge:           | 2+               |
| Retention time:   | 118.828157652800 |
| Score:            | 128.6401         |
| Mass Error (ppm): | 0.25145          |
| DEP:              | 1.8274506        |
| Precursor Type:   | ISO              |

| b <sup>2+</sup> ion |              | b ion      |              |    |     |    | y ion        |            | y <sup>2+</sup> ion |            |
|---------------------|--------------|------------|--------------|----|-----|----|--------------|------------|---------------------|------------|
| Δ dalton            | mass         | Δ dalton   | mass         |    | seq |    | Δ dalton     | mass       | Δ dalton            | mass       |
|                     | 114.09134045 |            | 114.09134045 | 1  | I   | 19 |              |            |                     |            |
|                     | 242.18630346 | -0.0340818 | 242.18630346 | 2  | K   | 18 | 2103.1524907 |            | 2103.1524907        |            |
|                     | 339.23906732 |            | 339.23906732 | 3  | P   | 17 | 1975.0575277 |            | 988.03240209        | +0.193367  |
|                     | 486.30748123 | +0.0156389 | 486.30748123 | 4  | F   | 16 | 1878.0047639 |            | 1878.0047639        |            |
|                     | 599.39154521 | -0.066472  | 599.39154521 | 5  | I   | 15 | 1730.9363499 |            | 865.9718132         | +0.3384285 |
|                     | 696.44430907 |            | 696.44430907 | 6  | P   | 14 | 1617.852286  |            | 809.42978121        | -0.2090781 |
|                     | 811.4712521  |            | 811.4712521  | 7  | D   | 13 | 1520.7995221 |            | 1520.7995221        |            |
|                     | 958.53966601 | -0.1946953 | 958.53966601 | 8  | F   | 12 | 1405.7725791 |            | 703.38992777        | +0.0674087 |
| -0.0846072          | 536.31550323 | -0.1145747 | 1071.62373   | 9  | I   | 11 | 1258.7041652 |            | 629.85572081        | +0.0642011 |
|                     | 1168.6764938 |            | 1168.6764938 | 10 | P   | 10 | 1145.6201012 | -0.1313316 | 573.31368882        | +0.1210646 |
| -0.1088214          | 669.89464901 | -0.1439055 | 1239.7136076 | 11 | A   | 9  | 1048.5673373 | -0.1474155 | 1048.5673373        |            |
|                     | 1395.8034853 |            | 1395.8034853 | 12 | V   | 8  | 977.53022354 | -0.1157338 | 977.53022354        |            |
|                     | 1395.8034853 |            | 1395.8034853 | 13 | G   | 7  | 878.46180962 | -0.1734795 | 439.73454304        | +0.3652494 |
|                     | 1510.8304283 |            | 1510.8304283 | 14 | D   | 6  | 821.4403459  | +0.0031355 | 821.4403459         |            |
|                     | 1623.9144923 |            | 1623.9144923 | 15 | I   | 5  | 706.41340287 | -0.0323604 | 706.41340287        |            |
|                     | 1738.9414353 |            | 1738.9414353 | 16 | D   | 4  | 593.32933889 | -0.0651177 | 593.32933889        |            |
| +0.3496775          | 905.49291279 |            | 1809.9785491 | 17 | A   | 3  | 478.30239586 |            | 478.30239586        |            |
| -0.3222858          | 979.02711974 |            | 1957.046963  | 18 | F   | 2  | 407.26528207 |            | 407.26528207        |            |
| +0.2848522          | 1035.5691517 |            | 2070.131027  | 19 | I   | 1  | 260.19686815 |            | 260.19686815        |            |
|                     |              |            |              | 20 | K   | 0  | 147.11280417 |            | 147.11280417        |            |

general information

|                       |             |
|-----------------------|-------------|
| Annotation:           | 17 of 20    |
| AminoAcids Coverage:  | 85 %        |
| Intensity Coverage:   | 72 %        |
| Peak Coverage:        | 22 %        |
| Protein Localisation: | 150 ... 169 |

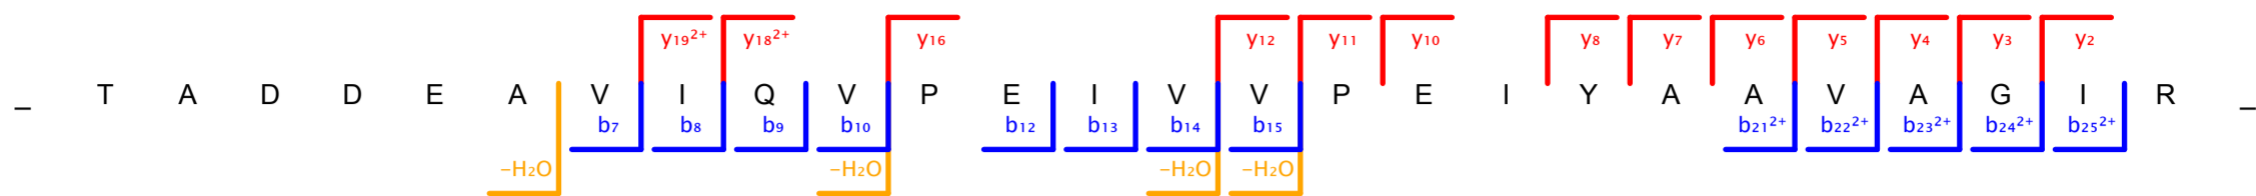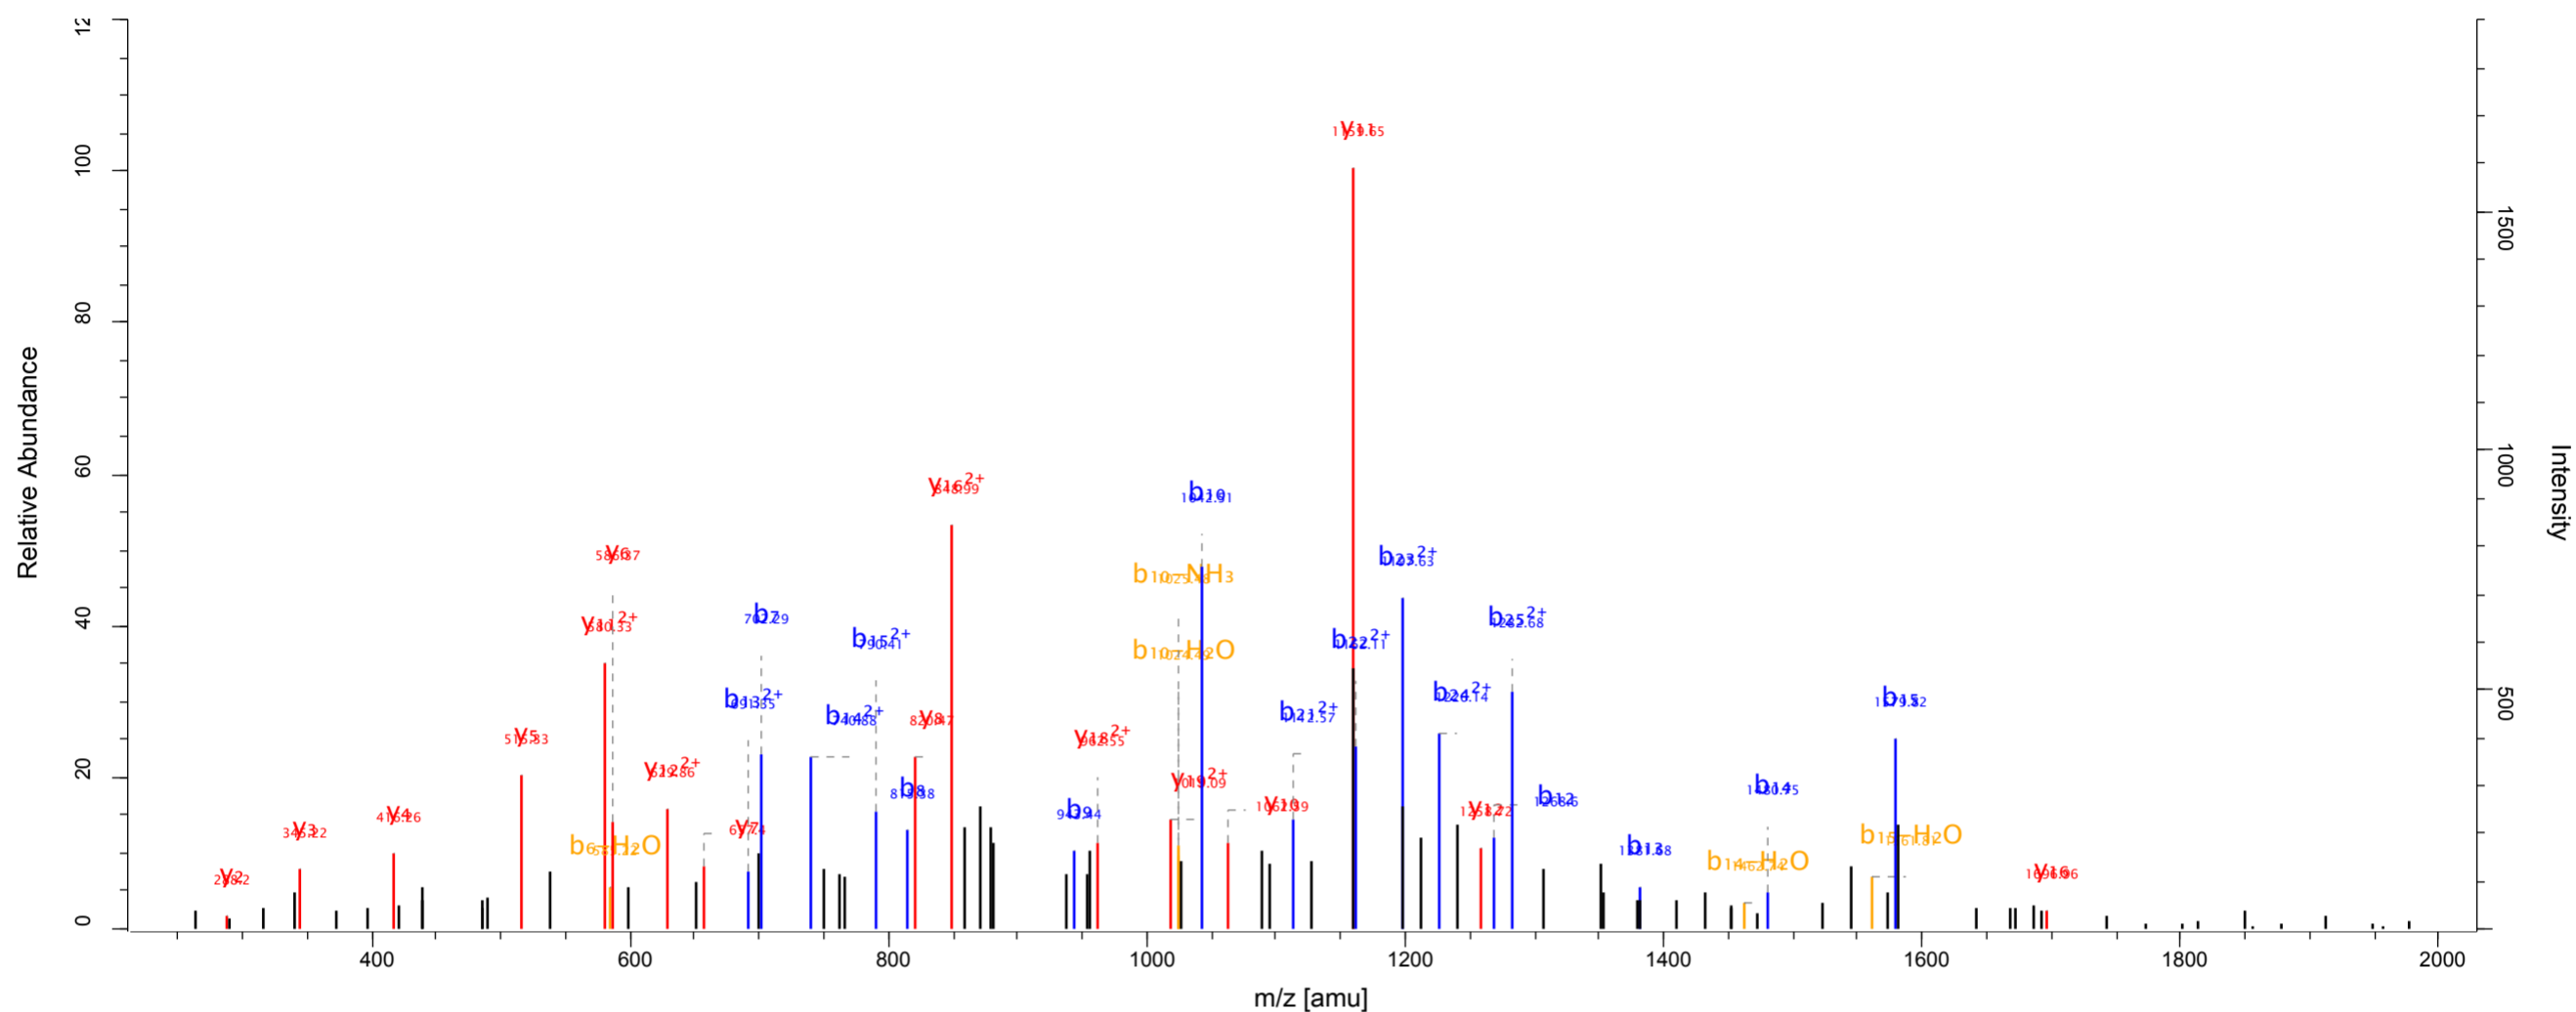

precursor information

|                   |                  |
|-------------------|------------------|
| Mass:             | 2727.4526        |
| m/z:              | 1012.40181       |
| Charge:           | 2+               |
| Retention time:   | 122.222422022262 |
| Score:            | 175.2285         |
| Mass Error (ppm): | 0.077657         |
| PEP:              | 2.5287E-21       |
| Precursor Type:   | ISO              |

| b <sup>2+</sup> ion |              | b ion      |              |    |     |    | y ion        |            | y <sup>2+</sup> ion |            |
|---------------------|--------------|------------|--------------|----|-----|----|--------------|------------|---------------------|------------|
| Δ dalton            | mass         | Δ dalton   | mass         |    | seq |    | Δ dalton     | mass       | Δ dalton            | mass       |
|                     | 102.05495494 |            | 102.05495494 | 1  | T   | 25 |              |            |                     |            |
|                     | 173.09206873 |            | 173.09206873 | 2  | A   | 24 | 2637.4134095 |            | 2637.4134095        |            |
|                     | 288.11901176 |            | 288.11901176 | 3  | D   | 23 | 2566.3762957 |            | 2566.3762957        |            |
|                     | 403.14595479 |            | 403.14595479 | 4  | D   | 22 | 2451.3493526 |            | 2451.3493526        |            |
|                     | 532.18854789 |            | 532.18854789 | 5  | E   | 21 | 2336.3224096 |            | 2336.3224096        |            |
|                     | 603.22566168 |            | 603.22566168 | 6  | A   | 20 | 2207.2798165 |            | 2207.2798165        |            |
|                     | 702.29407559 | -0.2036825 | 702.29407559 | 7  | V   | 19 | 2136.2427027 |            | 2136.2427027        |            |
|                     | 815.37813957 | -0.0213891 | 815.37813957 | 8  | I   | 18 | 2037.1742888 |            | 1019.0907826        | -0.1899648 |
|                     | 943.43671708 | -0.1972762 | 943.43671708 | 9  | Q   | 17 | 1924.0902248 |            | 962.54875064        | -0.1434772 |
|                     | 1042.505131  | -0.133549  | 1042.505131  | 10 | V   | 16 | 1796.0316473 |            | 1796.0316473        |            |
|                     | 1139.5578949 |            | 1139.5578949 | 11 | P   | 15 | 1696.9632334 | -0.0617441 | 848.98525493        | +0.070226  |
|                     | 1268.6004879 | -0.4416745 | 1268.6004879 | 12 | E   | 14 | 1599.9104695 |            | 1599.9104695        |            |
| +0.0405604          | 691.3459142  | -0.280133  | 1381.6845519 | 13 | I   | 13 | 1470.8678764 |            | 1470.8678764        |            |
| -0.1754703          | 740.88012116 | -0.1944942 | 1480.7529658 | 14 | V   | 12 | 1357.7838125 |            | 1357.7838125        |            |
| -0.0815034          | 790.41432811 | -0.2113944 | 1579.8213798 | 15 | V   | 11 | 1258.7153985 | +0.3092597 | 629.86133751        | +0.0044462 |
|                     | 1676.8741436 |            | 1676.8741436 | 16 | P   | 10 | 1159.6469846 | -0.0752073 | 580.32713055        | -0.006696  |
|                     | 1805.9167367 |            | 1805.9167367 | 17 | E   | 9  | 1062.5942208 | -0.3934151 | 1062.5942208        |            |
|                     | 1919.0008007 |            | 1919.0008007 | 18 | I   | 8  | 933.55162768 |            | 933.55162768        |            |
|                     | 2082.0641292 |            | 2082.0641292 | 19 | Y   | 7  | 820.4675637  | +0.0598411 | 820.4675637         |            |
|                     | 2153.101243  |            | 2153.101243  | 20 | A   | 6  | 657.40423516 | -0.0964959 | 657.40423516        |            |
| -0.2493303          | 1112.5728166 |            | 2224.1383568 | 21 | A   | 5  | 586.36712138 | -0.0216014 | 586.36712138        |            |
| +0.098787           | 1162.1070236 |            | 2323.2067707 | 22 | V   | 4  | 515.33000759 | -0.0888577 | 515.33000759        |            |
| -0.2627875          | 1197.6255805 |            | 2394.2438845 | 23 | A   | 3  | 416.26159367 | -0.0707978 | 416.26159367        |            |
| +0.0030919          | 1226.1363123 |            | 2451.2653482 | 24 | G   | 2  | 345.22447989 | -0.0237658 | 345.22447989        |            |
| -0.0804439          | 1282.6783443 |            | 2564.3494122 | 25 | I   | 1  | 288.20301616 | +0.1717397 | 288.20301616        |            |
|                     |              |            |              | 26 | R   | 0  | 175.11895218 |            | 175.11895218        |            |

general information

|                       |             |
|-----------------------|-------------|
| Annotation:           | 21 of 26    |
| AminoAcids Coverage:  | 81 %        |
| Intensity Coverage:   | 65 %        |
| Peak Coverage:        | 27 %        |
| Protein Localisation: | 386 ... 411 |

Scan number 10310 Raw file 20091025\_Orbi6\_MaHe\_SA\_ADH\_exp3\_Matr\_dil\_Gel09  
 Method ITMS; CID Genenames CDC42EP4

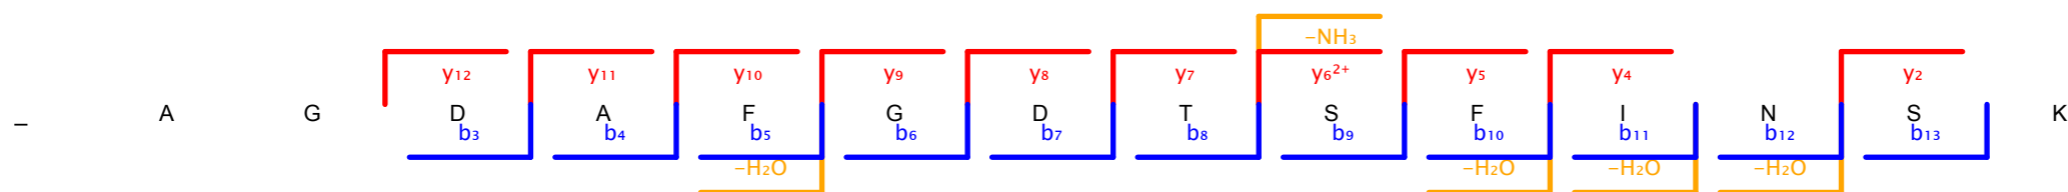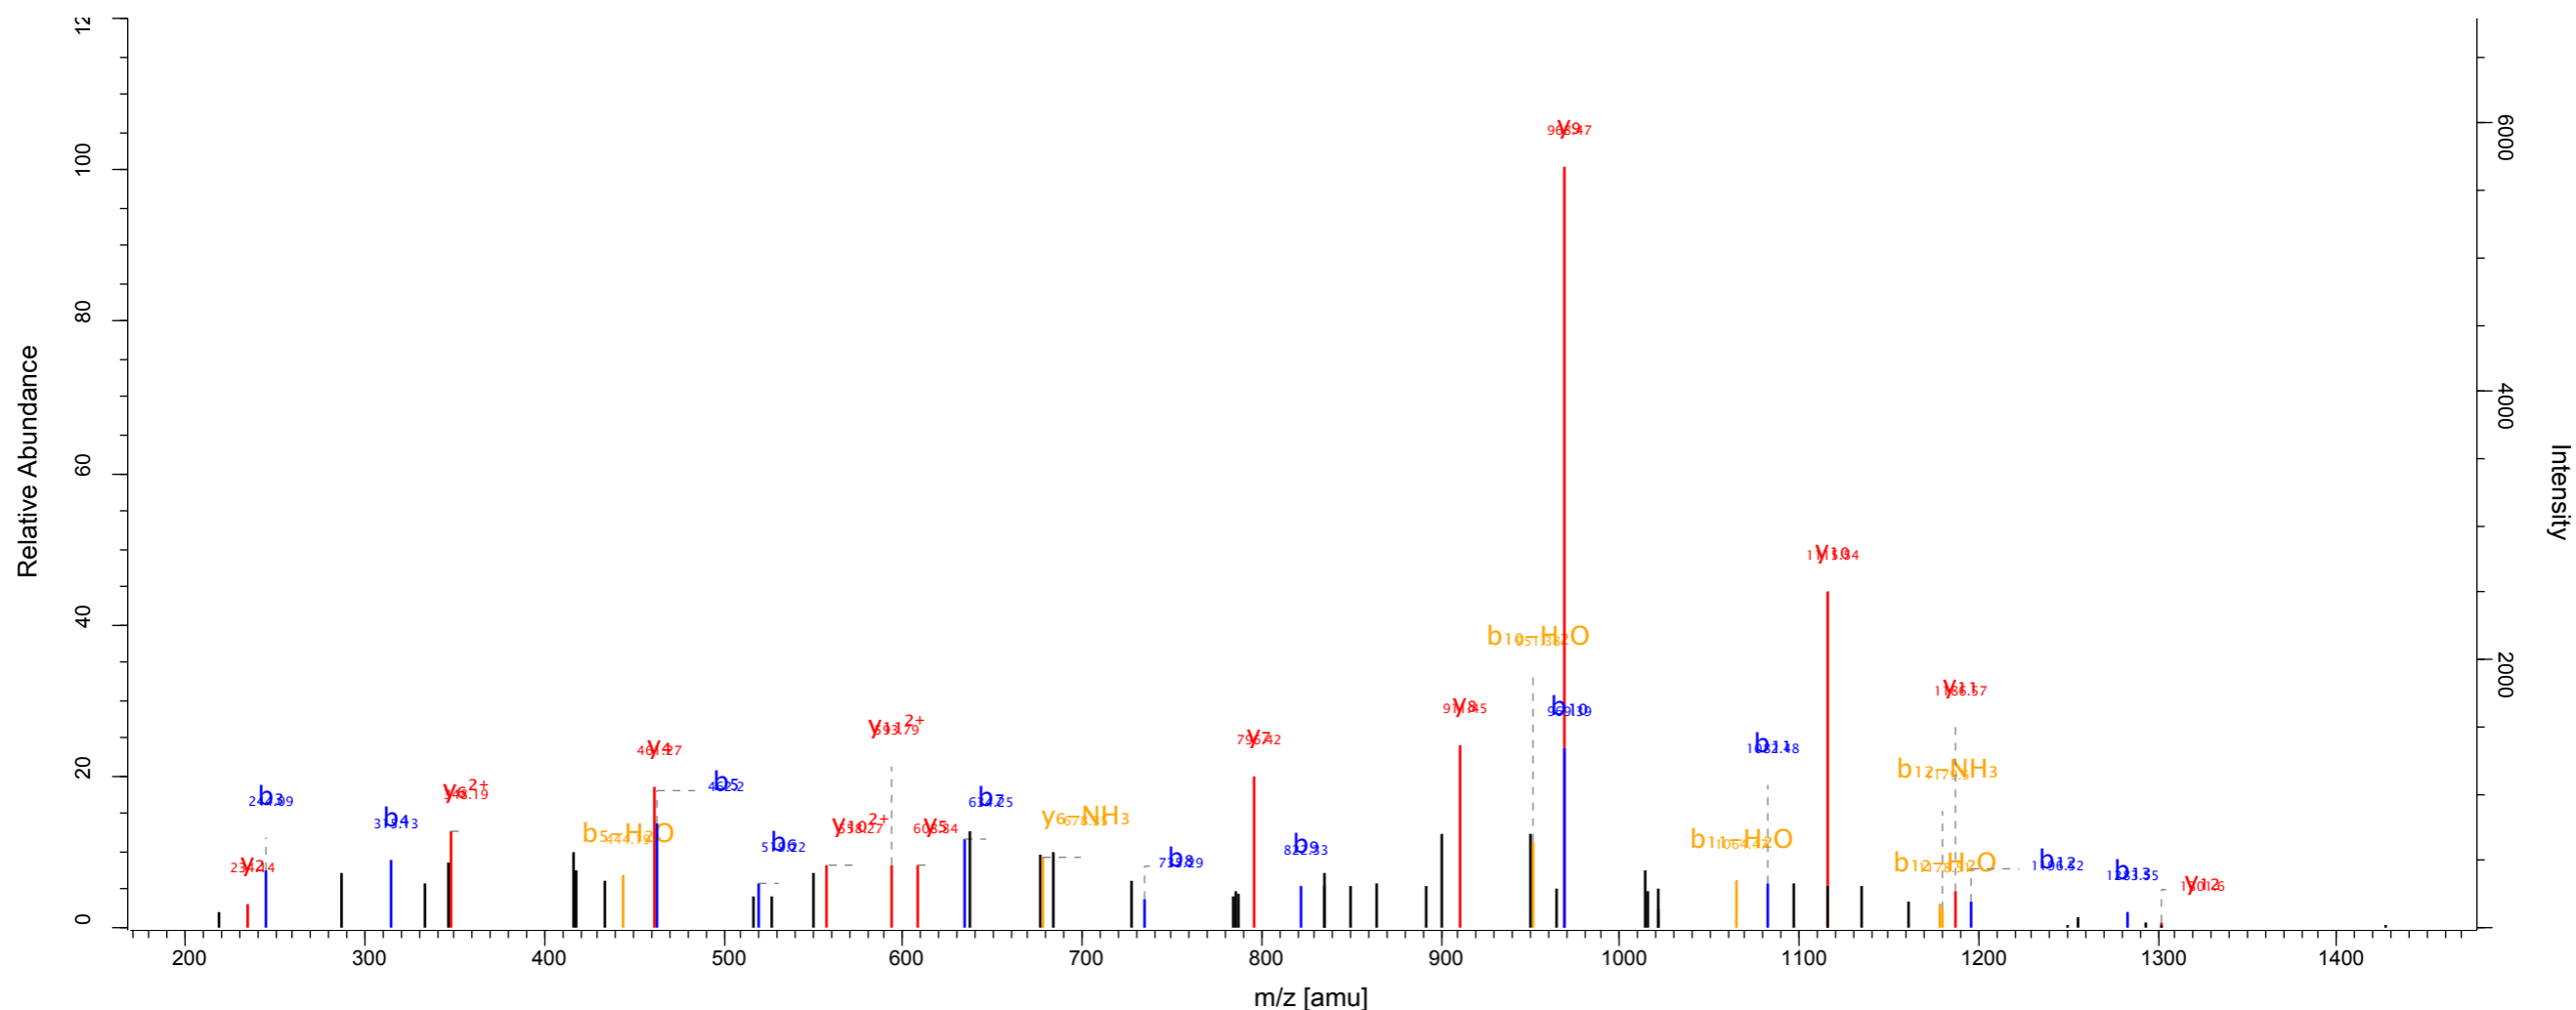

precursor information

|                   |                  |
|-------------------|------------------|
| Mass:             | 1428.652         |
| m/z:              | 715.22228        |
| Charge:           | 2+               |
| Potentiaetime:    | 64.0080547220402 |
| Score:            | 168.7580         |
| Mass Error [ppm]: | 0.08588          |
| PEP:              | 2.1072508        |
| Precursor Type:   | ISO              |

general information

|                       |           |
|-----------------------|-----------|
| Annotation:           | 11 of 14  |
| AminoAcids Coverage:  | 70%       |
| Intensity Coverage:   | 64%       |
| Peak Coverage:        | 42%       |
| Protein Localisation: | 43 ... 56 |

| b ion      |                |    |     |    | y ion          |            | y <sup>2+</sup> ion |            |
|------------|----------------|----|-----|----|----------------|------------|---------------------|------------|
| Δ dalton   | mass           |    | seq |    | Δ dalton       | mass       | Δ dalton            | mass       |
|            | 72.044390254   | 1  | A   | 13 |                |            |                     |            |
|            | 129.065853978  | 2  | G   | 12 | 1358.622286024 |            | 1358.622286024      |            |
| +0.0770028 | 244.09279701   | 3  | D   | 11 | 1301.6008223   | +0.0288164 | 1301.6008223        |            |
| -0.0482458 | 315.129910798  | 4  | A   | 10 | 1186.573879268 | -0.1218529 | 593.790577867       | +0.0830794 |
| +0.0485015 | 462.198324714  | 5  | F   | 9  | 1115.53676548  | -0.1078104 | 558.272020973       | -0.1431758 |
| +0.1422111 | 519.219788438  | 6  | G   | 8  | 968.468351564  | -0.1465132 | 968.468351564       |            |
| -0.1560943 | 634.24673147   | 7  | D   | 7  | 911.44688784   | -0.1788214 | 911.44688784        |            |
| -0.1051399 | 735.294409944  | 8  | T   | 6  | 796.419944808  | -0.0464097 | 796.419944808       |            |
| +0.0669332 | 822.326438354  | 9  | S   | 5  | 695.372266334  |            | 348.1897714         | +0.0002921 |
| +0.0195154 | 969.39485227   | 10 | F   | 4  | 608.340237924  | +0.0669886 | 608.340237924       |            |
| -0.1770364 | 1082.47891625  | 11 | I   | 3  | 461.271824008  | +0.0165061 | 461.271824008       |            |
| -0.3156669 | 1196.521843697 | 12 | N   | 2  | 348.187760028  |            | 348.187760028       |            |
| +0.0083838 | 1283.553872107 | 13 | S   | 1  | 234.14483258   | +0.0399514 | 234.14483258        |            |
|            |                | 14 | K   | 0  | 147.112804171  |            | 147.112804171       |            |

Scan number 11894 Raw file 20091025\_Orbi6\_MaHe\_SA\_ADH\_exp3\_Matr\_dil\_Gel10  
 Method ITMS; CID Genenames PDCD1LG2

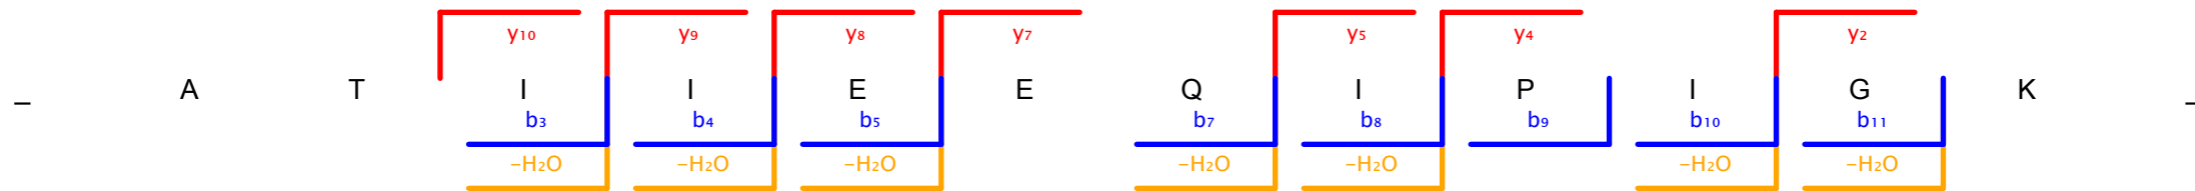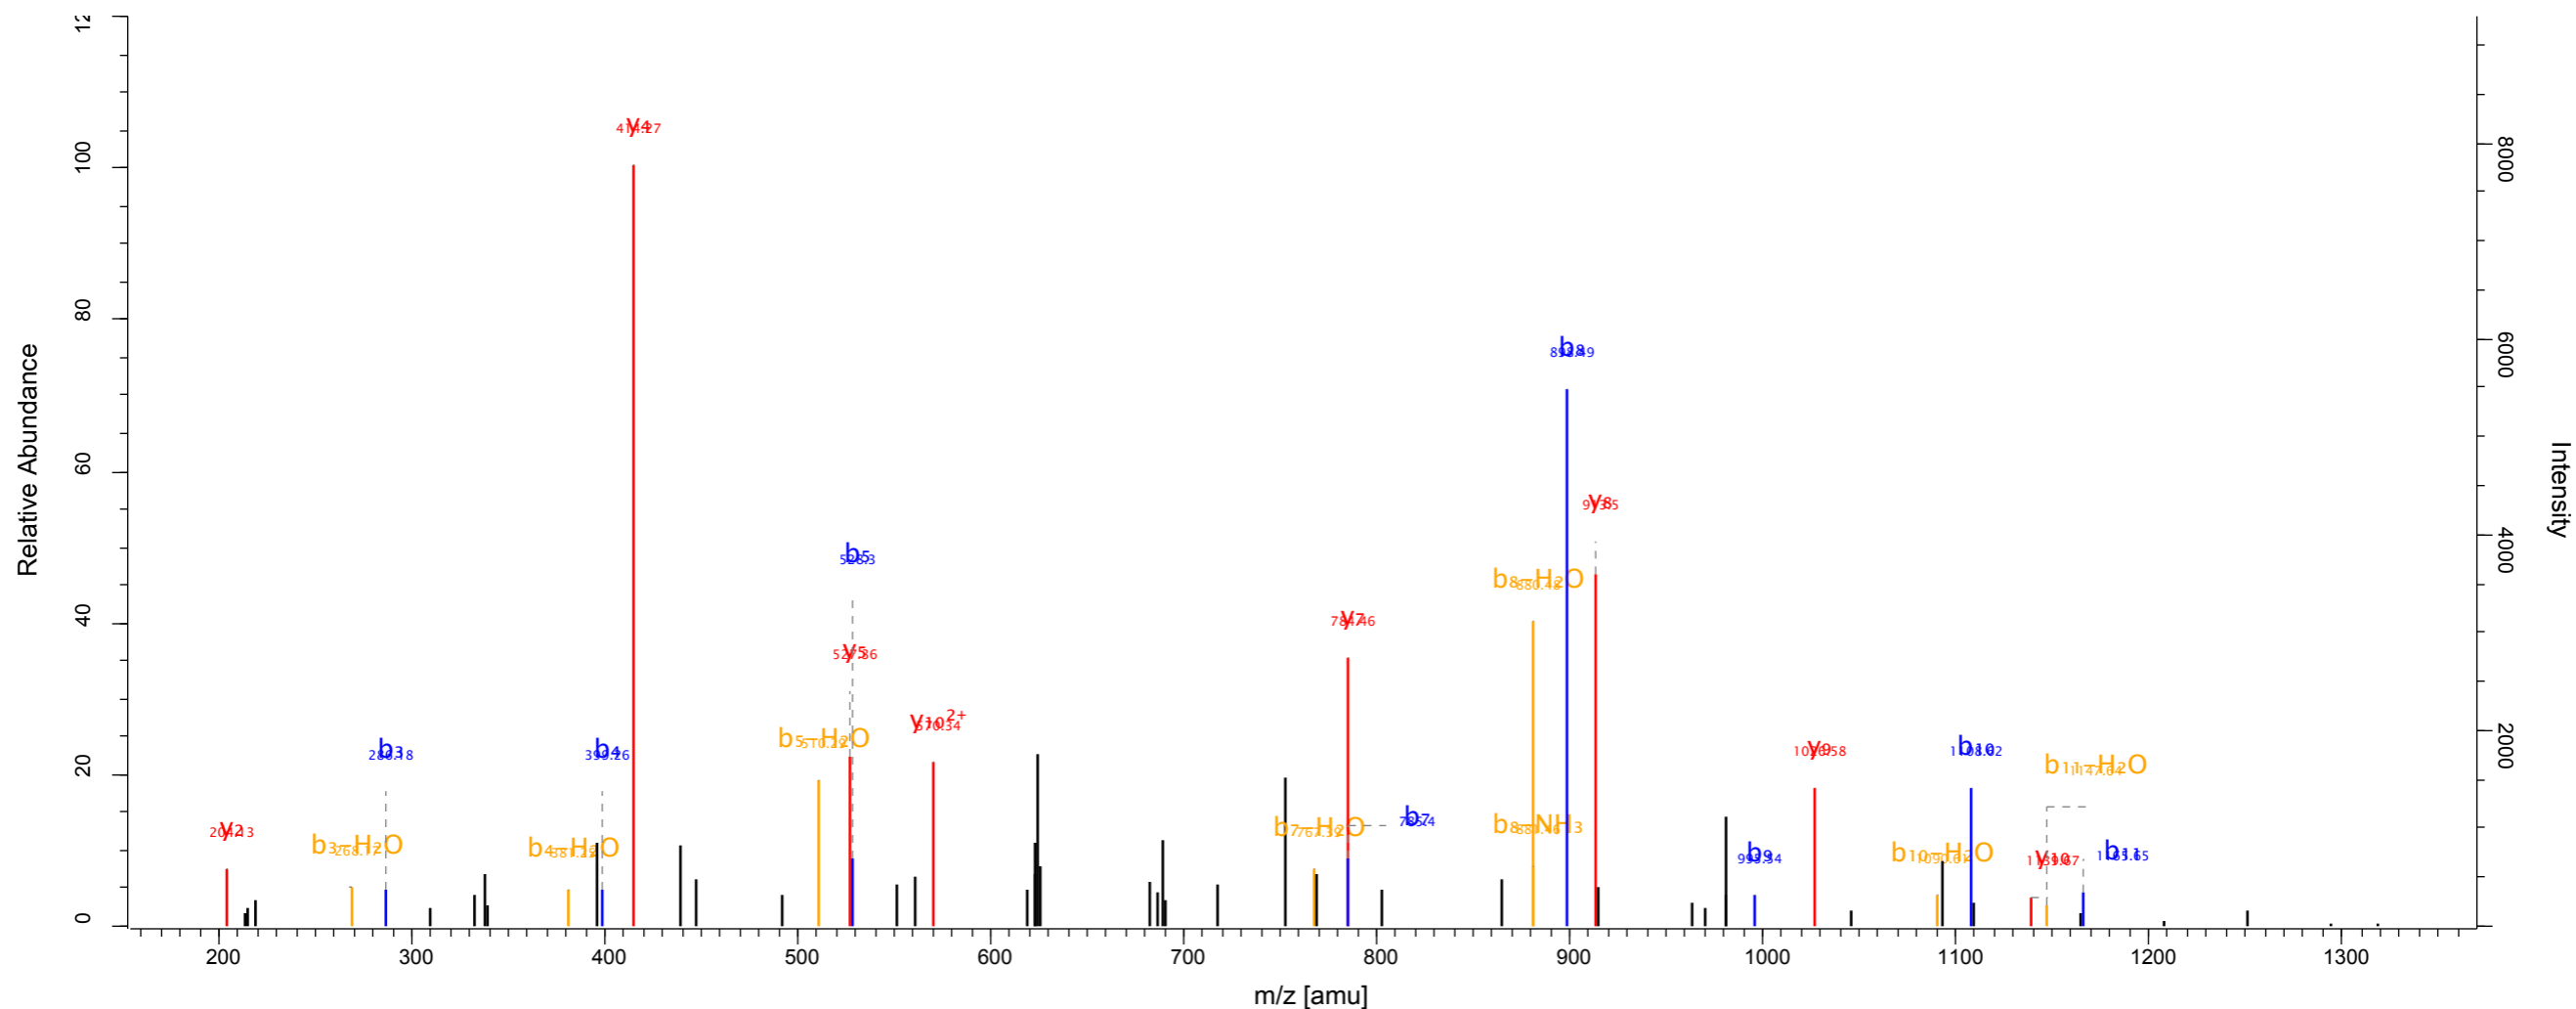

precursor information

|                   |                  |
|-------------------|------------------|
| Mass:             | 1210.71105       |
| m/z:              | 656.27075        |
| Charge:           | 2+               |
| Retention time:   | 73.7104200161133 |
| Score:            | 167.1786         |
| Mass Error (ppm): | 0.20202          |
| PEP:              | 2.124E-05        |
| Precursor Type:   | MULTI            |

general information

|                       |           |
|-----------------------|-----------|
| Annotation:           | 0 of 12   |
| AminoAcids Coverage:  | 75 %      |
| Intensity Coverage:   | 67 %      |
| Peak Coverage:        | 28 %      |
| Protein Localisation: | 73 ... 84 |

| b ion      |                |    |     |    | y ion          |            | y <sup>2+</sup> ion |            |
|------------|----------------|----|-----|----|----------------|------------|---------------------|------------|
| Δ dalton   | mass           |    | seq |    | Δ dalton       | mass       | Δ dalton            | mass       |
|            | 72.044390254   | 1  | A   | 11 |                |            |                     |            |
|            | 173.092068728  | 2  | T   | 10 | 1240.714729846 |            | 1240.714729846      |            |
| -0.2543493 | 286.176132709  | 3  | I   | 9  | 1139.667051372 | -0.1400738 | 570.337163919       | +0.0070744 |
| -0.0791054 | 399.260196689  | 4  | I   | 8  | 1026.582987391 | -0.1493936 | 1026.582987391      |            |
| -0.0683538 | 528.302789786  | 5  | E   | 7  | 913.498923411  | -0.0426856 | 913.498923411       |            |
|            | 657.345382882  | 6  | E   | 6  | 784.456330315  | -0.0233469 | 784.456330315       |            |
| -0.1163017 | 785.403960393  | 7  | Q   | 5  | 655.413737218  |            | 655.413737218       |            |
| -0.1427485 | 898.488024374  | 8  | I   | 4  | 527.355159707  | -0.1414756 | 527.355159707       |            |
| -0.127153  | 995.540788226  | 9  | P   | 3  | 414.271095727  | -0.0536275 | 414.271095727       |            |
| -0.2089587 | 1108.624852206 | 10 | I   | 2  | 317.218331875  |            | 317.218331875       |            |
| -0.1511987 | 1165.64631593  | 11 | G   | 1  | 204.134267894  | -0.0976468 | 204.134267894       |            |
|            |                | 12 | K   | 0  | 147.112804171  |            | 147.112804171       |            |

Scan number 3572 Raw file 20091027\_Orbi6\_MaHe\_SA\_ADH\_exp3\_FN\_Gel01  
 Method ITMS; CID Genenames DLG3

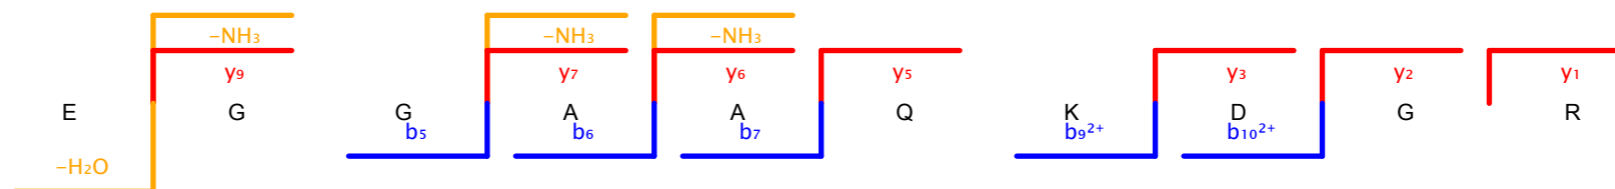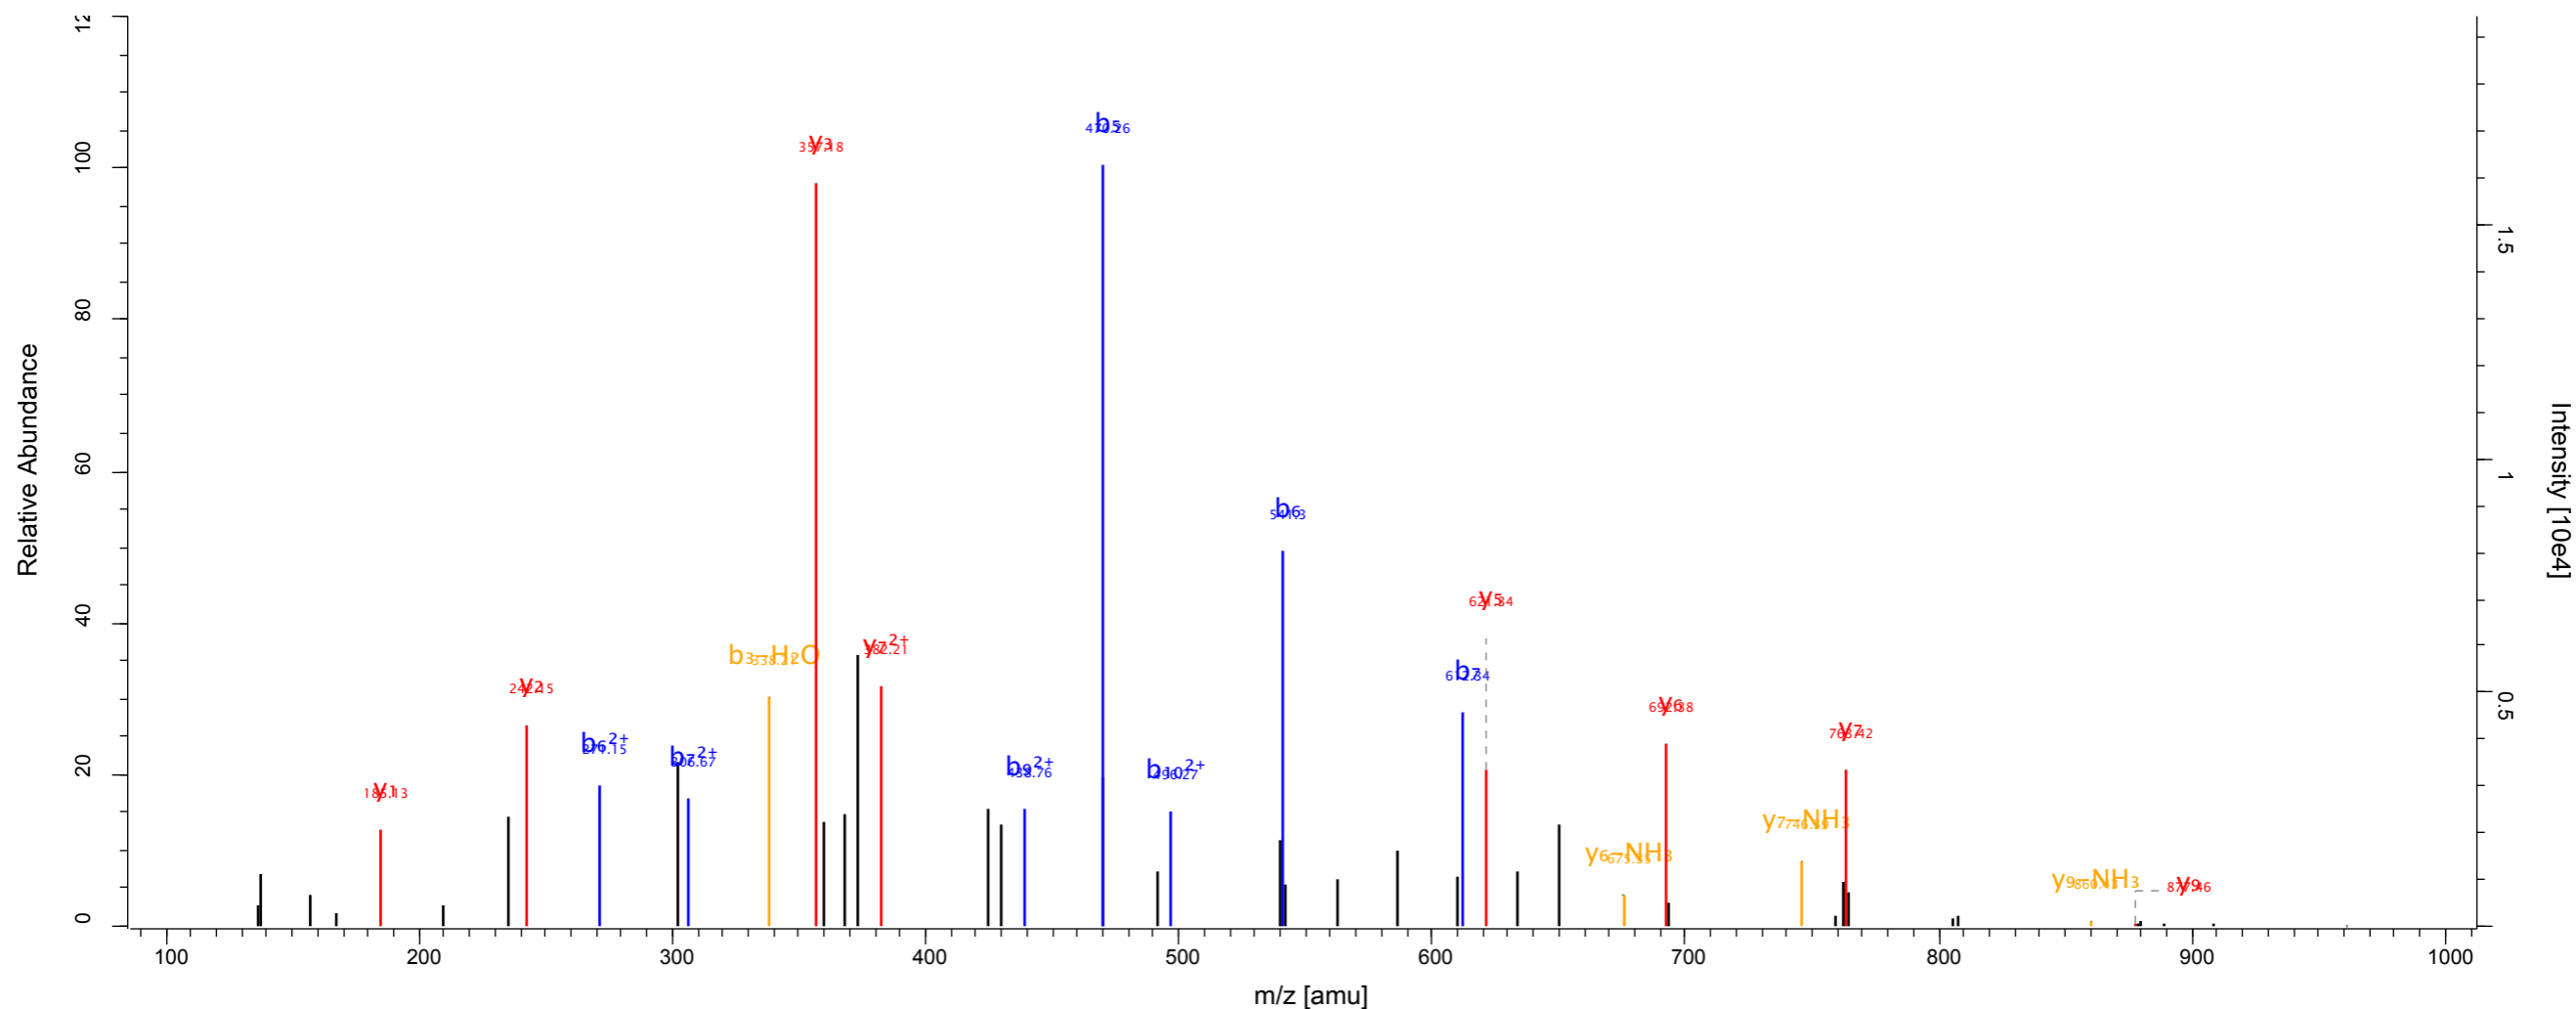

precursor information

|                   |                  |
|-------------------|------------------|
| Mass:             | 1212.61088       |
| m/z:              | 405.55124        |
| Charge:           | 2+               |
| Retention time:   | 35.7522111572266 |
| Score:            | 125.8587         |
| Mass Error (ppm): | -0.40081         |
| PEP:              | 0.214505         |
| Precursor Type:   | MULTI            |

general information

|                       |             |
|-----------------------|-------------|
| Annotation:           | 10 of 12    |
| AminoAcids Coverage:  | 82 %        |
| Intensity Coverage:   | 67 %        |
| Peak Coverage:        | 27 %        |
| Protein Localisation: | 278 ... 289 |

| b <sup>2+</sup> ion |              | b ion      |              |    |     |    | y ion        |            | y <sup>2+</sup> ion |            |
|---------------------|--------------|------------|--------------|----|-----|----|--------------|------------|---------------------|------------|
| Δ dalton            | mass         | Δ dalton   | mass         |    | seq |    | Δ dalton     | mass       | Δ dalton            | mass       |
|                     | 114.09134045 |            | 114.09134045 | 1  | I   | 11 |              |            |                     |            |
|                     | 227.17540443 |            | 227.17540443 | 2  | I   | 10 | 1119.587179  |            | 1119.587179         |            |
|                     | 356.21799752 |            | 356.21799752 | 3  | E   | 9  | 1006.503115  |            | 1006.503115         |            |
|                     | 413.23946125 |            | 413.23946125 | 4  | G   | 8  | 877.4605219  | +0.0067022 | 877.4605219         |            |
|                     | 470.26092497 | -0.049957  | 470.26092497 | 5  | G   | 7  | 820.43905818 |            | 820.43905818        |            |
| -0.0222865          | 271.15265761 | +0.0914876 | 541.29803876 | 6  | A   | 6  | 763.41759445 | -0.0290446 | 382.21243546        | -0.0531642 |
| +0.0536085          | 306.67121451 | +0.0242835 | 612.33515255 | 7  | A   | 5  | 692.38048067 | +0.0230838 | 692.38048067        |            |
|                     | 740.39373006 |            | 740.39373006 | 8  | Q   | 4  | 621.34336688 | -0.0234206 | 621.34336688        |            |
| +0.0697144          | 438.75508418 |            | 876.50289189 | 9  | K   | 3  | 493.28478937 |            | 493.28478937        |            |
| +0.0874319          | 496.26855569 |            | 991.52983492 | 10 | D   | 2  | 357.17562754 | -0.0239857 | 357.17562754        |            |
|                     | 1048.5512986 |            | 1048.5512986 | 11 | G   | 1  | 242.1486845  | -0.0003691 | 242.1486845         |            |
|                     |              |            |              | 12 | R   | 0  | 185.12722078 | -0.0295035 | 185.12722078        |            |

Scan number 10822 Raw file 20091027\_Orbi6\_MaHe\_SA\_ADH\_exp3\_FN\_Gel02  
 Method ITMS; CID Genenames CDKN2A

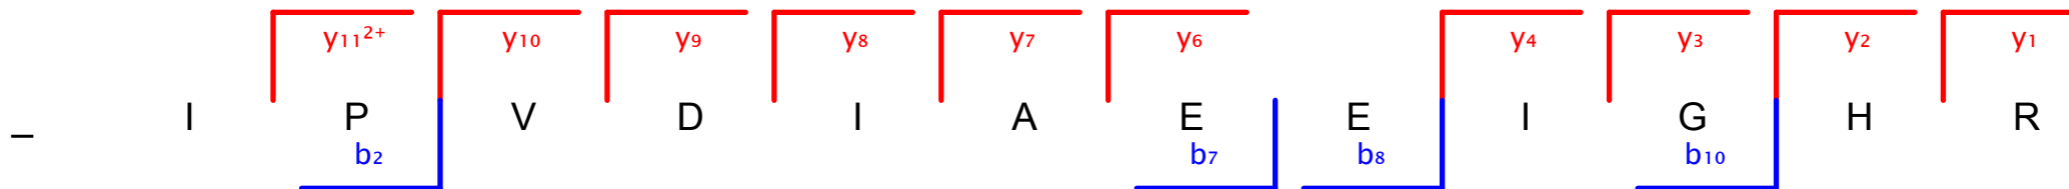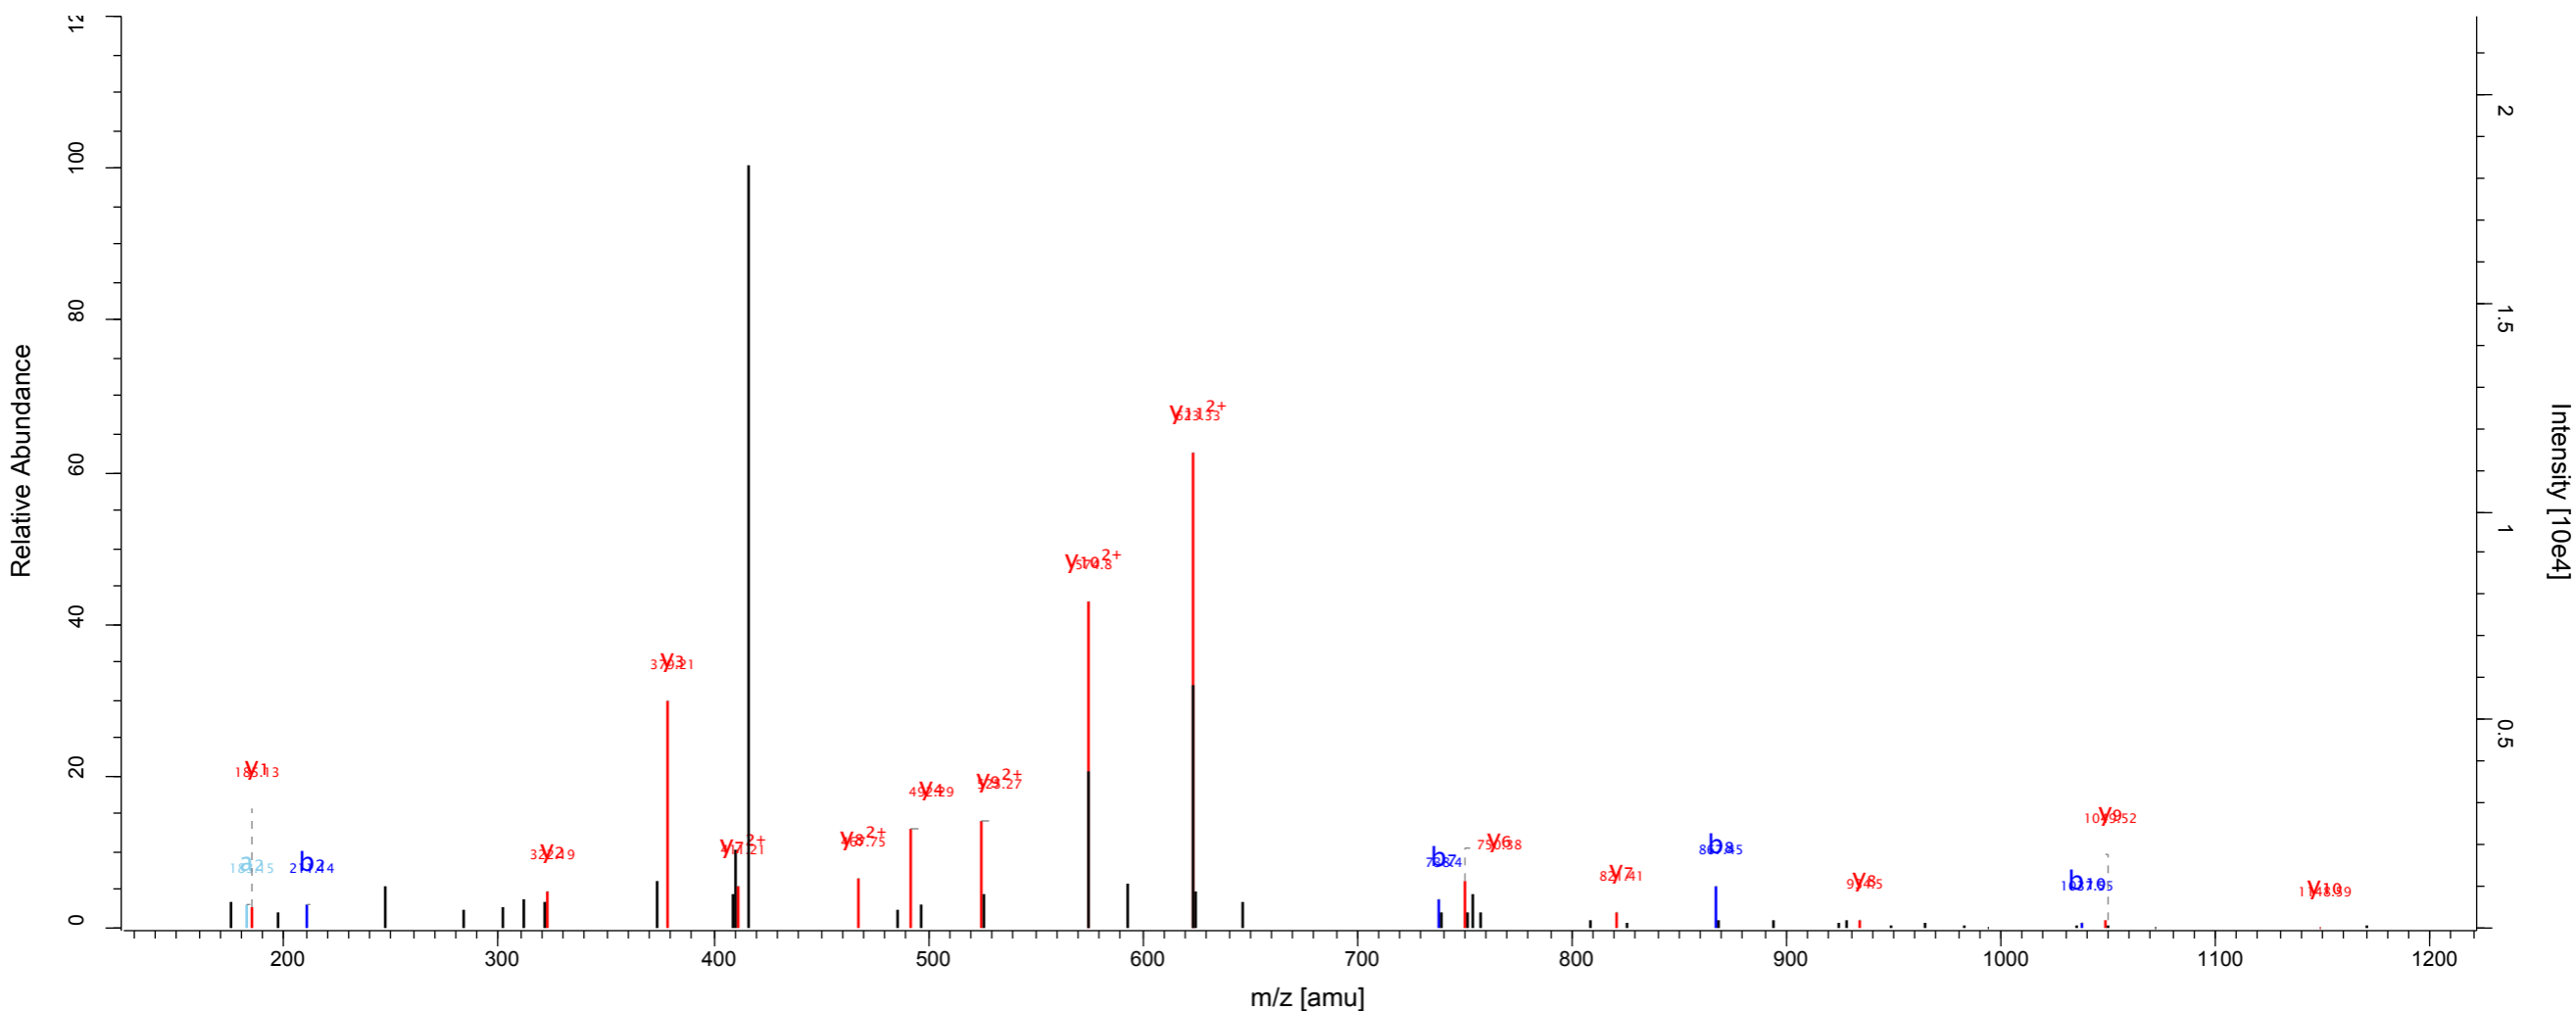

precursor information

|                   |                 |
|-------------------|-----------------|
| Mass:             | 1247.71261      |
| m/z:              | 450.24515       |
| Charge:           | 2+              |
| Retentiontime:    | 68.102732215232 |
| Score:            | 131.8187        |
| Mass Error (ppm): | -0.77272        |
| PEP:              | 0.00010082      |
| Precursor Type:   | MULTI           |

general information

|                       |             |
|-----------------------|-------------|
| Annotation:           | 11 of 12    |
| AminoAcids Coverage:  | 92 %        |
| Intensity Coverage:   | 46 %        |
| Peak Coverage:        | 34 %        |
| Protein Localisation: | 113 ... 124 |

| a ion      |              | b ion      |              |    |     |    | y ion        |            | y <sup>2+</sup> ion |            |
|------------|--------------|------------|--------------|----|-----|----|--------------|------------|---------------------|------------|
| Δ dalton   | mass         | Δ dalton   | mass         |    | seq |    | Δ dalton     | mass       | Δ dalton            | mass       |
|            | 86.096425825 |            | 114.09134045 | 1  | I   | 11 |              |            |                     |            |
| -0.1082961 | 183.14918968 | -0.2537997 | 211.1441043  | 2  | P   | 10 | 1245.6461451 |            | 623.32671079        | -0.0396014 |
|            | 282.21760359 |            | 310.21251822 | 3  | V   | 9  | 1148.5933813 | +0.0773951 | 574.80032886        | -0.0986077 |
|            | 397.24454663 |            | 425.23946125 | 4  | D   | 8  | 1049.5249673 | -0.2073404 | 525.2661219         | -0.0105677 |
|            | 510.32861061 |            | 538.32352523 | 5  | I   | 7  | 934.49802431 | +0.0588605 | 467.75265039        | +0.0413865 |
|            | 581.36572439 |            | 609.36063902 | 6  | A   | 6  | 821.41396033 | -0.0096635 | 411.2106184         | +0.0885454 |
|            | 710.40831749 | -0.1462131 | 738.40323211 | 7  | E   | 5  | 750.37684654 | +0.0914152 | 750.37684654        |            |
|            | 839.45091059 | -0.1988159 | 867.44582521 | 8  | E   | 4  | 621.33425344 |            | 621.33425344        |            |
|            | 952.53497457 |            | 980.52988919 | 9  | I   | 3  | 492.29166035 | +0.0482139 | 492.29166035        |            |
|            | 1009.5564383 | -0.2766947 | 1037.5513529 | 10 | G   | 2  | 379.20759637 | +0.0033106 | 379.20759637        |            |
|            | 1146.6153502 |            | 1174.6102648 | 11 | H   | 1  | 322.18613264 | +0.0140932 | 322.18613264        |            |
|            |              |            |              | 12 | R   | 0  | 185.12722078 | +0.0648569 | 185.12722078        |            |

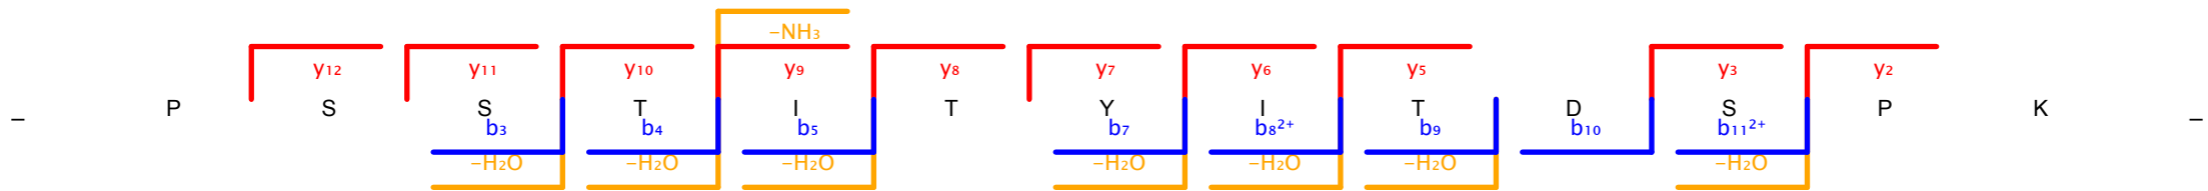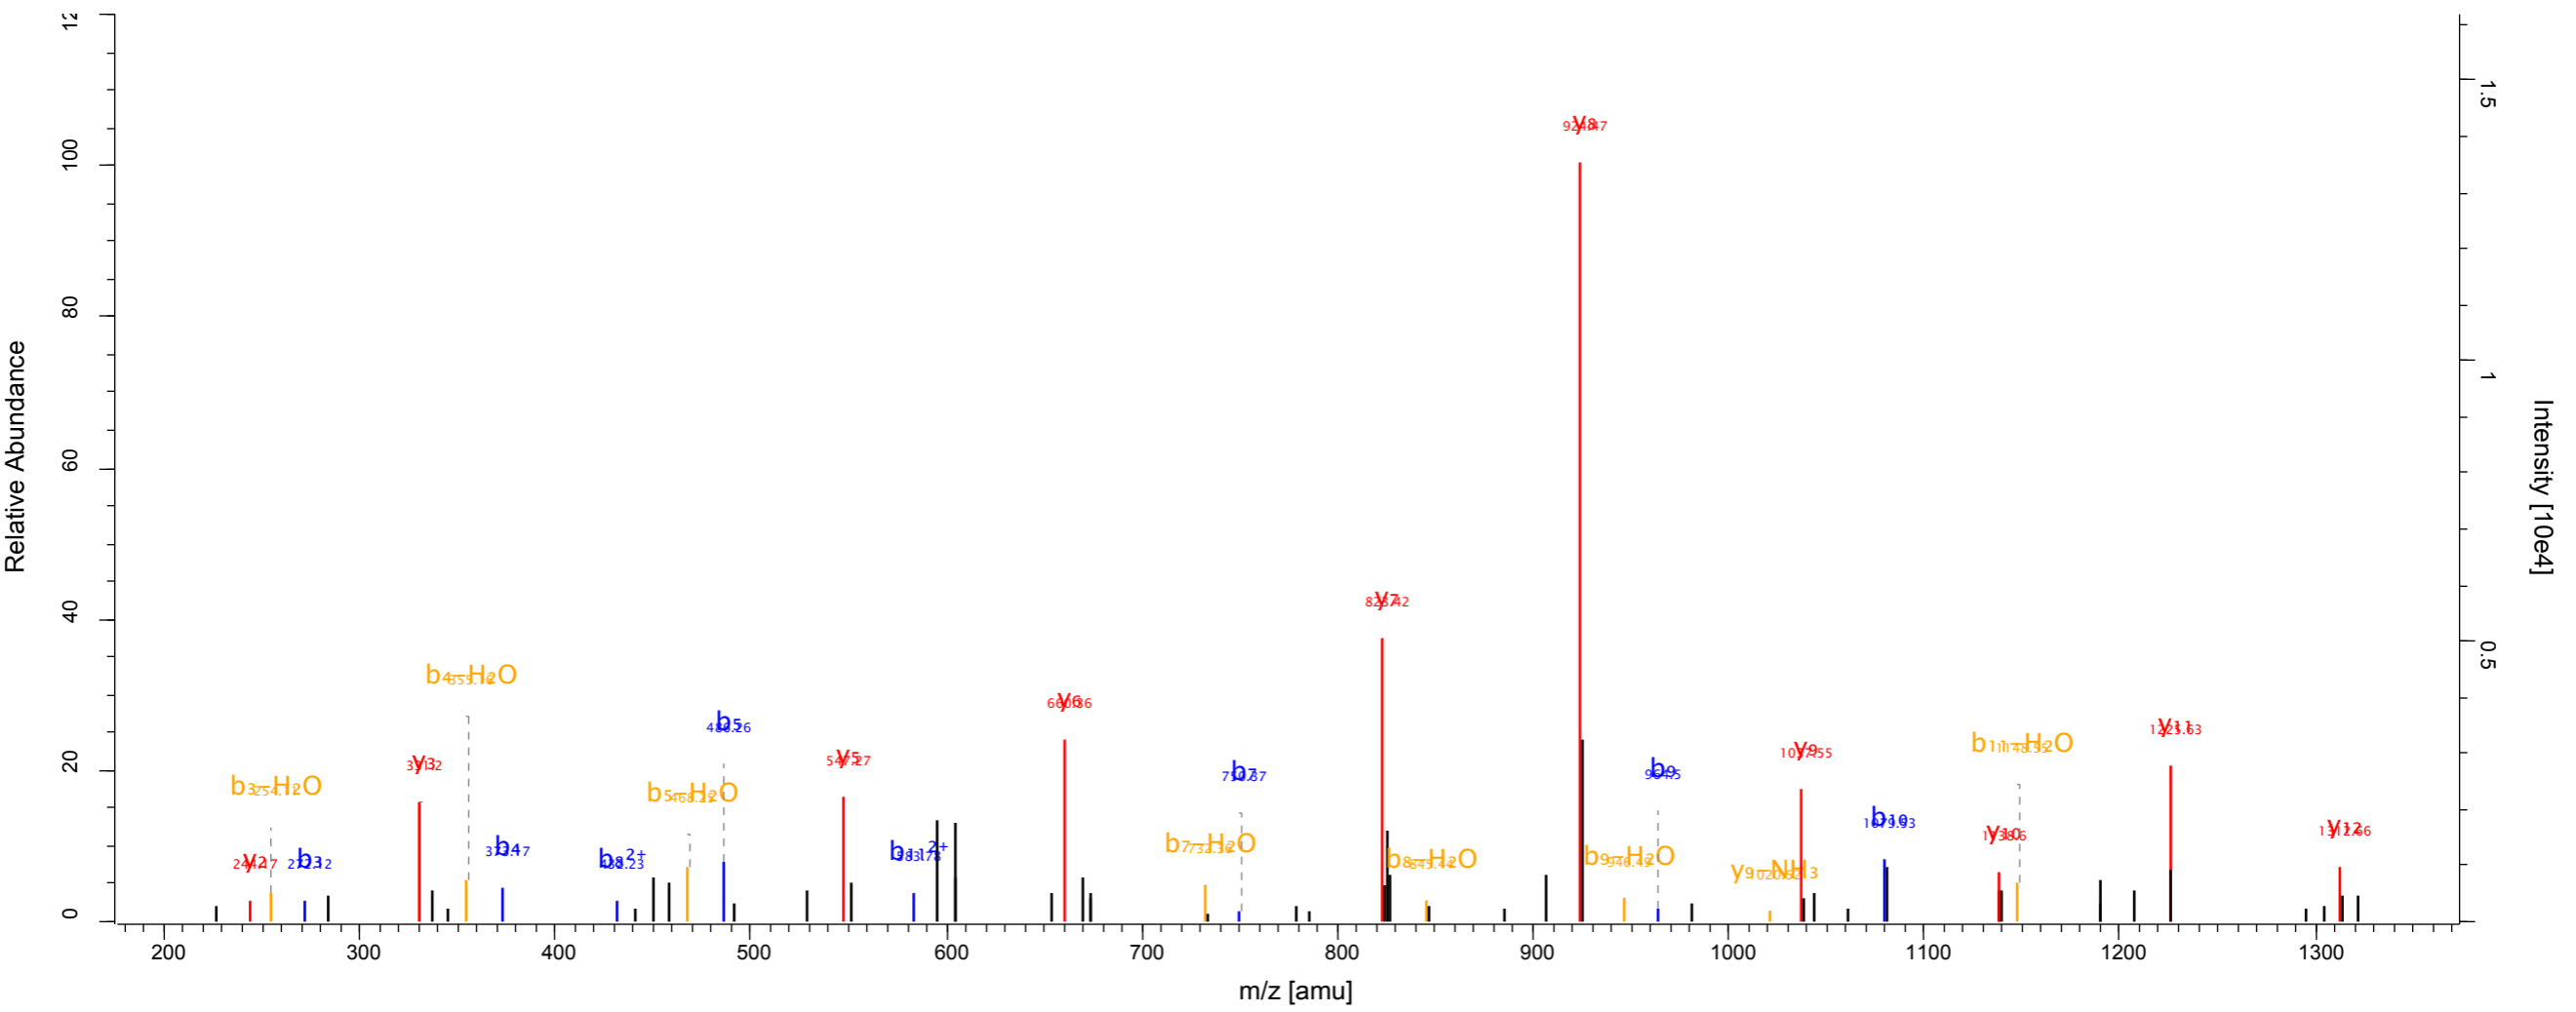

precursor information

|                   |                  |
|-------------------|------------------|
| Mass:             | 1408.70002       |
| m/z:              | 705.26170        |
| Charge:           | 2+               |
| Retentiontime:    | 50.5628218786621 |
| Score:            | 151.9761         |
| Mass Error (ppm): | 0.21511          |
| PEP:              | 2.2625E-06       |
| Precursor Type:   | MULTI            |

general information

|                       |           |
|-----------------------|-----------|
| Annotation:           | 11 of 12  |
| AminoAcids Coverage:  | 85 %      |
| Intensity Coverage:   | 61 %      |
| Peak Coverage:        | 28 %      |
| Protein Localisation: | 83 ... 95 |

| b <sup>2+</sup> ion |                | b ion      |                |     | y ion |          |                |
|---------------------|----------------|------------|----------------|-----|-------|----------|----------------|
| Δ dalton            | mass           | Δ dalton   | mass           | seq |       | Δ dalton | mass           |
|                     | 98.060040319   |            | 98.060040319   | 1   | P     | 12       |                |
|                     | 185.092068728  |            | 185.092068728  | 2   | S     | 11       | 1312.663088206 |
|                     | 272.124097138  | -0.0174382 | 272.124097138  | 3   | S     | 10       | 1225.631059796 |
|                     | 373.171775612  | +0.0074846 | 373.171775612  | 4   | T     | 9        | 1138.599031386 |
|                     | 486.255839593  | +0.1053665 | 486.255839593  | 5   | I     | 8        | 1037.551352912 |
|                     | 587.303518067  |            | 587.303518067  | 6   | T     | 7        | 924.467288931  |
|                     | 750.366846605  | -0.186915  | 750.366846605  | 7   | Y     | 6        | 823.419610457  |
| -0.0486736          | 432.229093526  |            | 863.450910586  | 8   | I     | 5        | 660.356281919  |
|                     | 964.49858906   | -0.0203176 | 964.49858906   | 9   | T     | 4        | 547.272217939  |
|                     | 1079.525532092 | -0.2069286 | 1079.525532092 | 10  | D     | 3        | 446.224539464  |
| -0.4369595          | 583.782418484  |            | 1166.557560502 | 11  | S     | 2        | 331.197596432  |
|                     | 1263.610324354 |            | 1263.610324354 | 12  | P     | 1        | 244.165568023  |
|                     |                |            |                | 13  | K     | 0        | 147.112804171  |



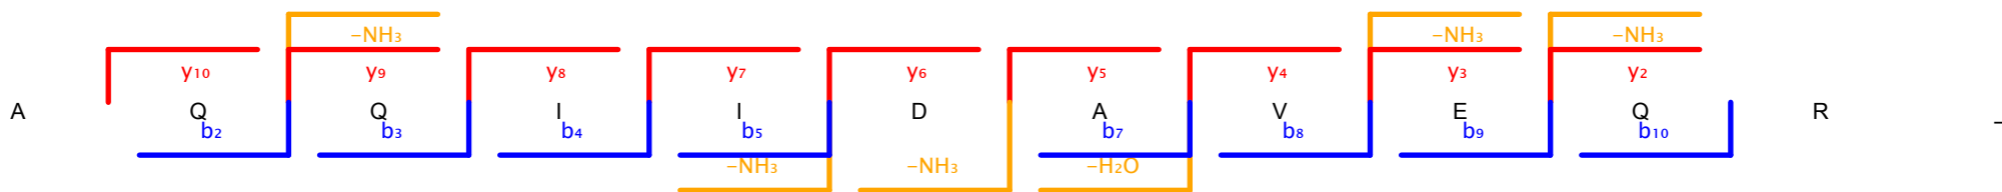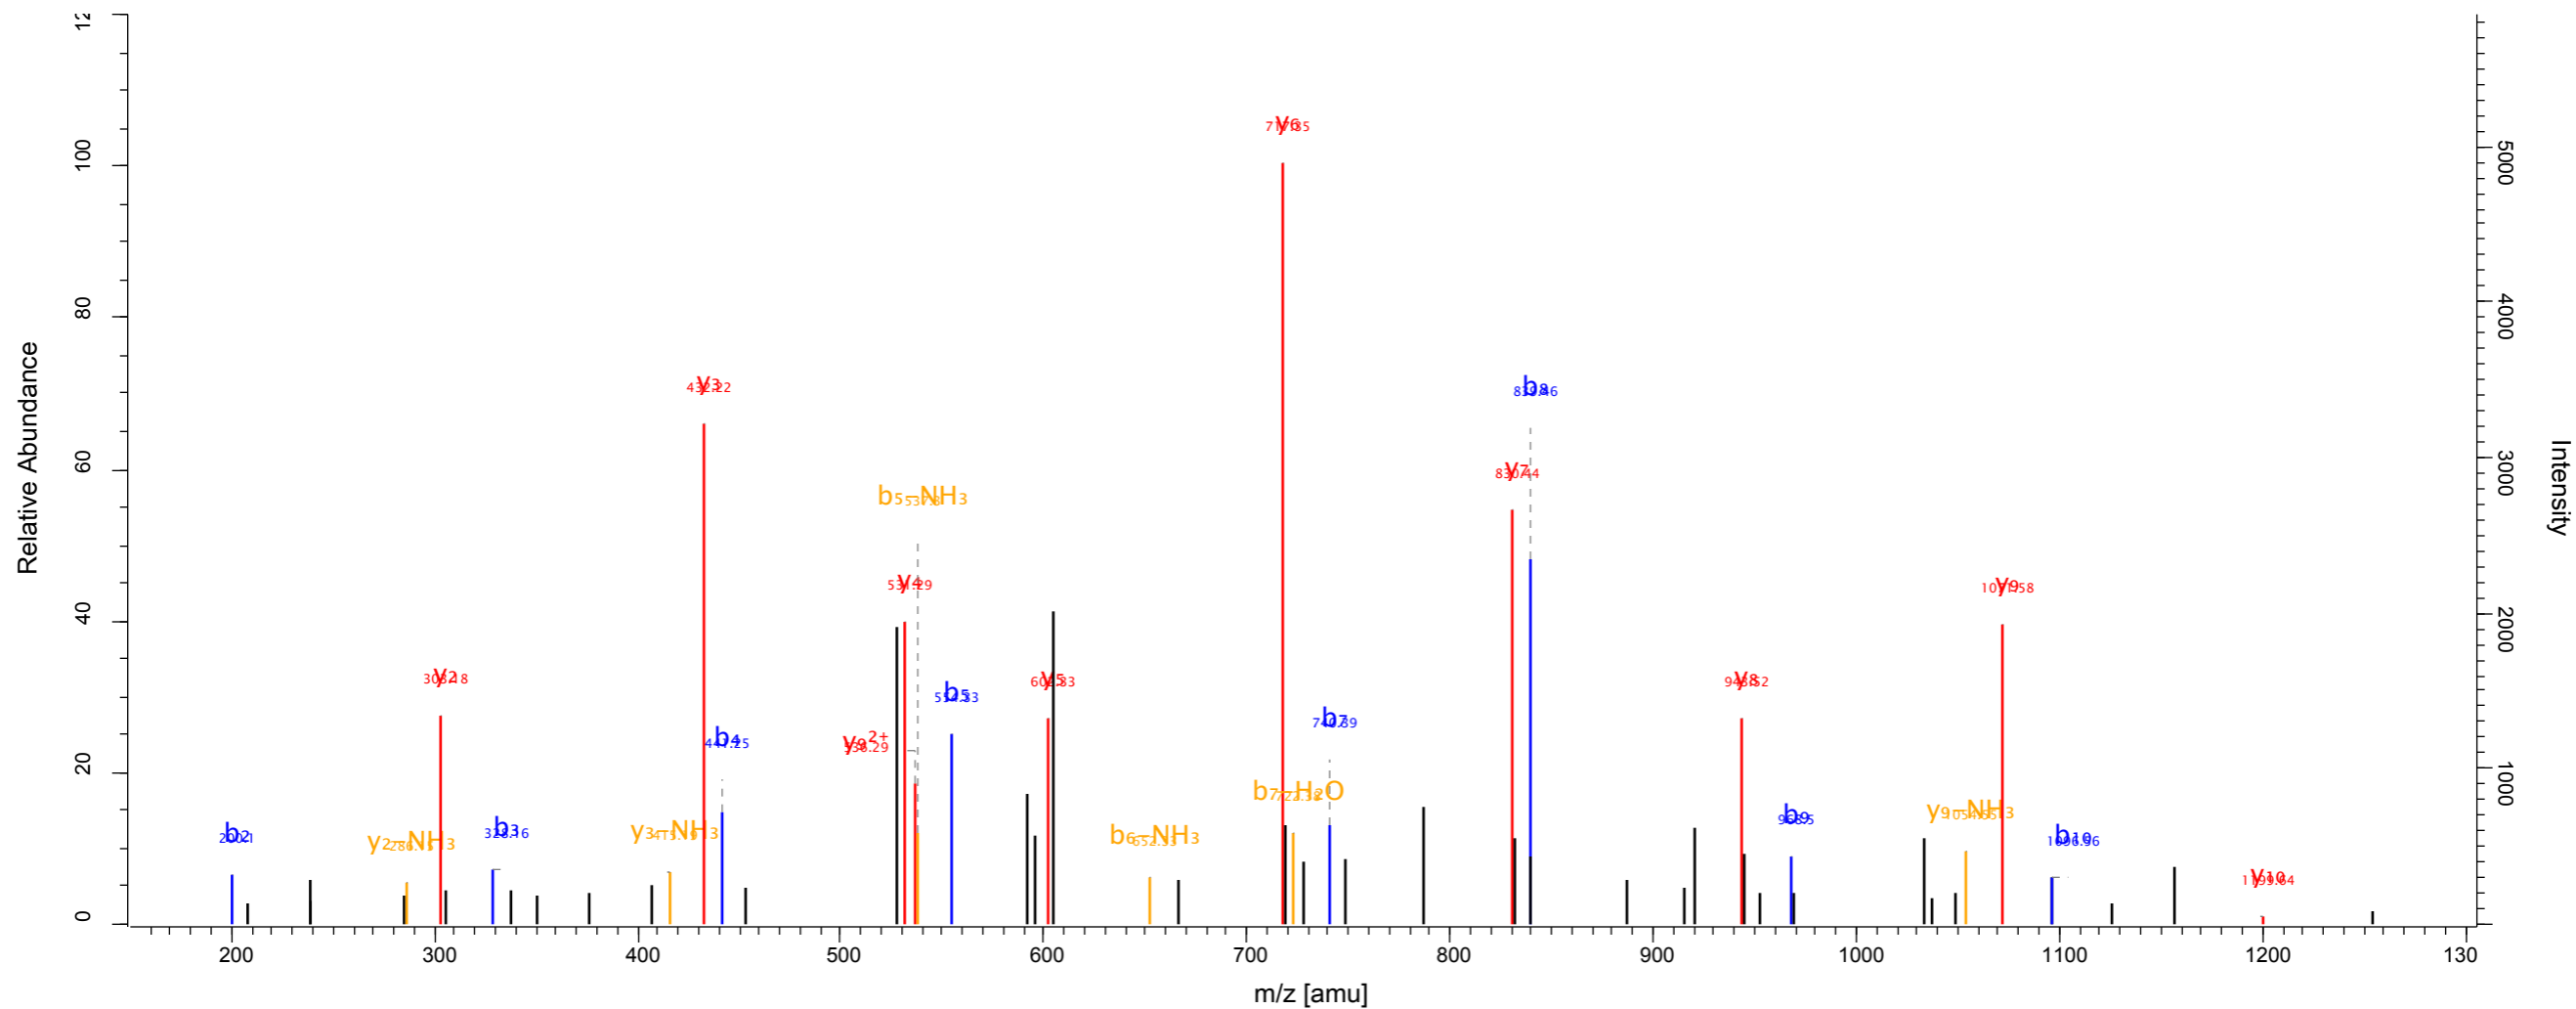

precursor information

|                   |                  |
|-------------------|------------------|
| Mass:             | 1269.66822       |
| m/z:              | 625.84130        |
| Charge:           | 2+               |
| Retention time:   | 52.6771650851071 |
| Score:            | 170.5214         |
| Mass Error (ppm): | 0.40896          |
| PEP:              | 0.00010626       |
| Precursor Type:   | ISO              |

general information

|                       |           |
|-----------------------|-----------|
| Annotation:           | 9 of 11   |
| AminoAcids Coverage:  | 82 %      |
| Intensity Coverage:   | 66 %      |
| Peak Coverage:        | 41 %      |
| Protein Localisation: | 40 ... 50 |

| b ion      |                |    |     |    | y ion          |            | y <sup>2+</sup> ion |            |
|------------|----------------|----|-----|----|----------------|------------|---------------------|------------|
| Δ dalton   | mass           |    | seq |    | Δ dalton       | mass       | Δ dalton            | mass       |
|            | 72.044390254   | 1  | A   | 10 |                |            |                     |            |
| +0.1299271 | 200.102967766  | 2  | Q   | 9  | 1199.637876508 | +0.1823139 | 1199.637876508      |            |
| -0.0230565 | 328.161545277  | 3  | Q   | 8  | 1071.579298997 | -0.0640402 | 536.293287732       | +0.0461288 |
| -0.0591469 | 441.245609258  | 4  | I   | 7  | 943.520721485  | -0.1645203 | 943.520721485       |            |
| +0.037087  | 554.329673238  | 5  | I   | 6  | 830.436657505  | -0.0080076 | 830.436657505       |            |
|            | 669.35661627   | 6  | D   | 5  | 717.352593525  | +0.0071477 | 717.352593525       |            |
| -0.1665572 | 740.393730058  | 7  | A   | 4  | 602.325650493  | +0.0997035 | 602.325650493       |            |
| -0.2216655 | 839.462143974  | 8  | V   | 3  | 531.288536705  | -0.0365225 | 531.288536705       |            |
| -0.2478401 | 968.50473707   | 9  | E   | 2  | 432.220122789  | +0.0743108 | 432.220122789       |            |
| -0.1328947 | 1096.563314582 | 10 | Q   | 1  | 303.177529692  | -0.0032743 | 303.177529692       |            |
|            |                | 11 | R   | 0  | 175.118952181  |            | 175.118952181       |            |

Scan number 18898 Raw file 20091027\_Orbi6\_MaHe\_SA\_ADH\_exp3\_FN\_Gel05  
 Method ITMS; CID Genenames KCTD17

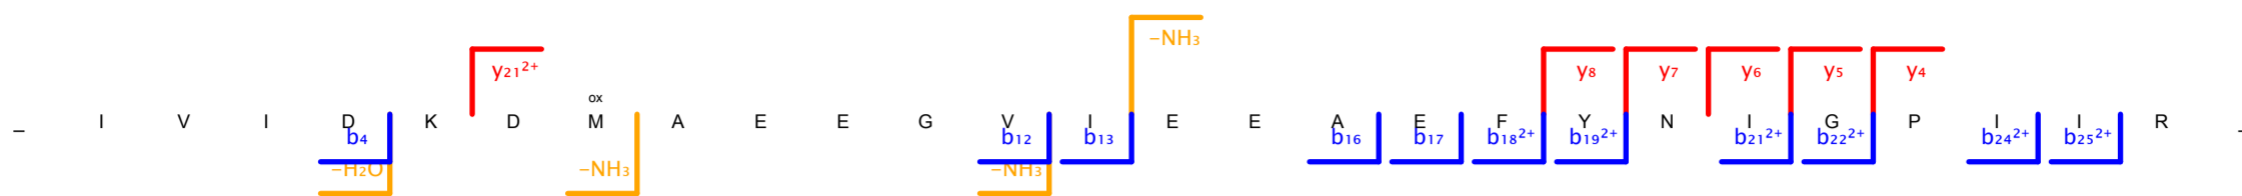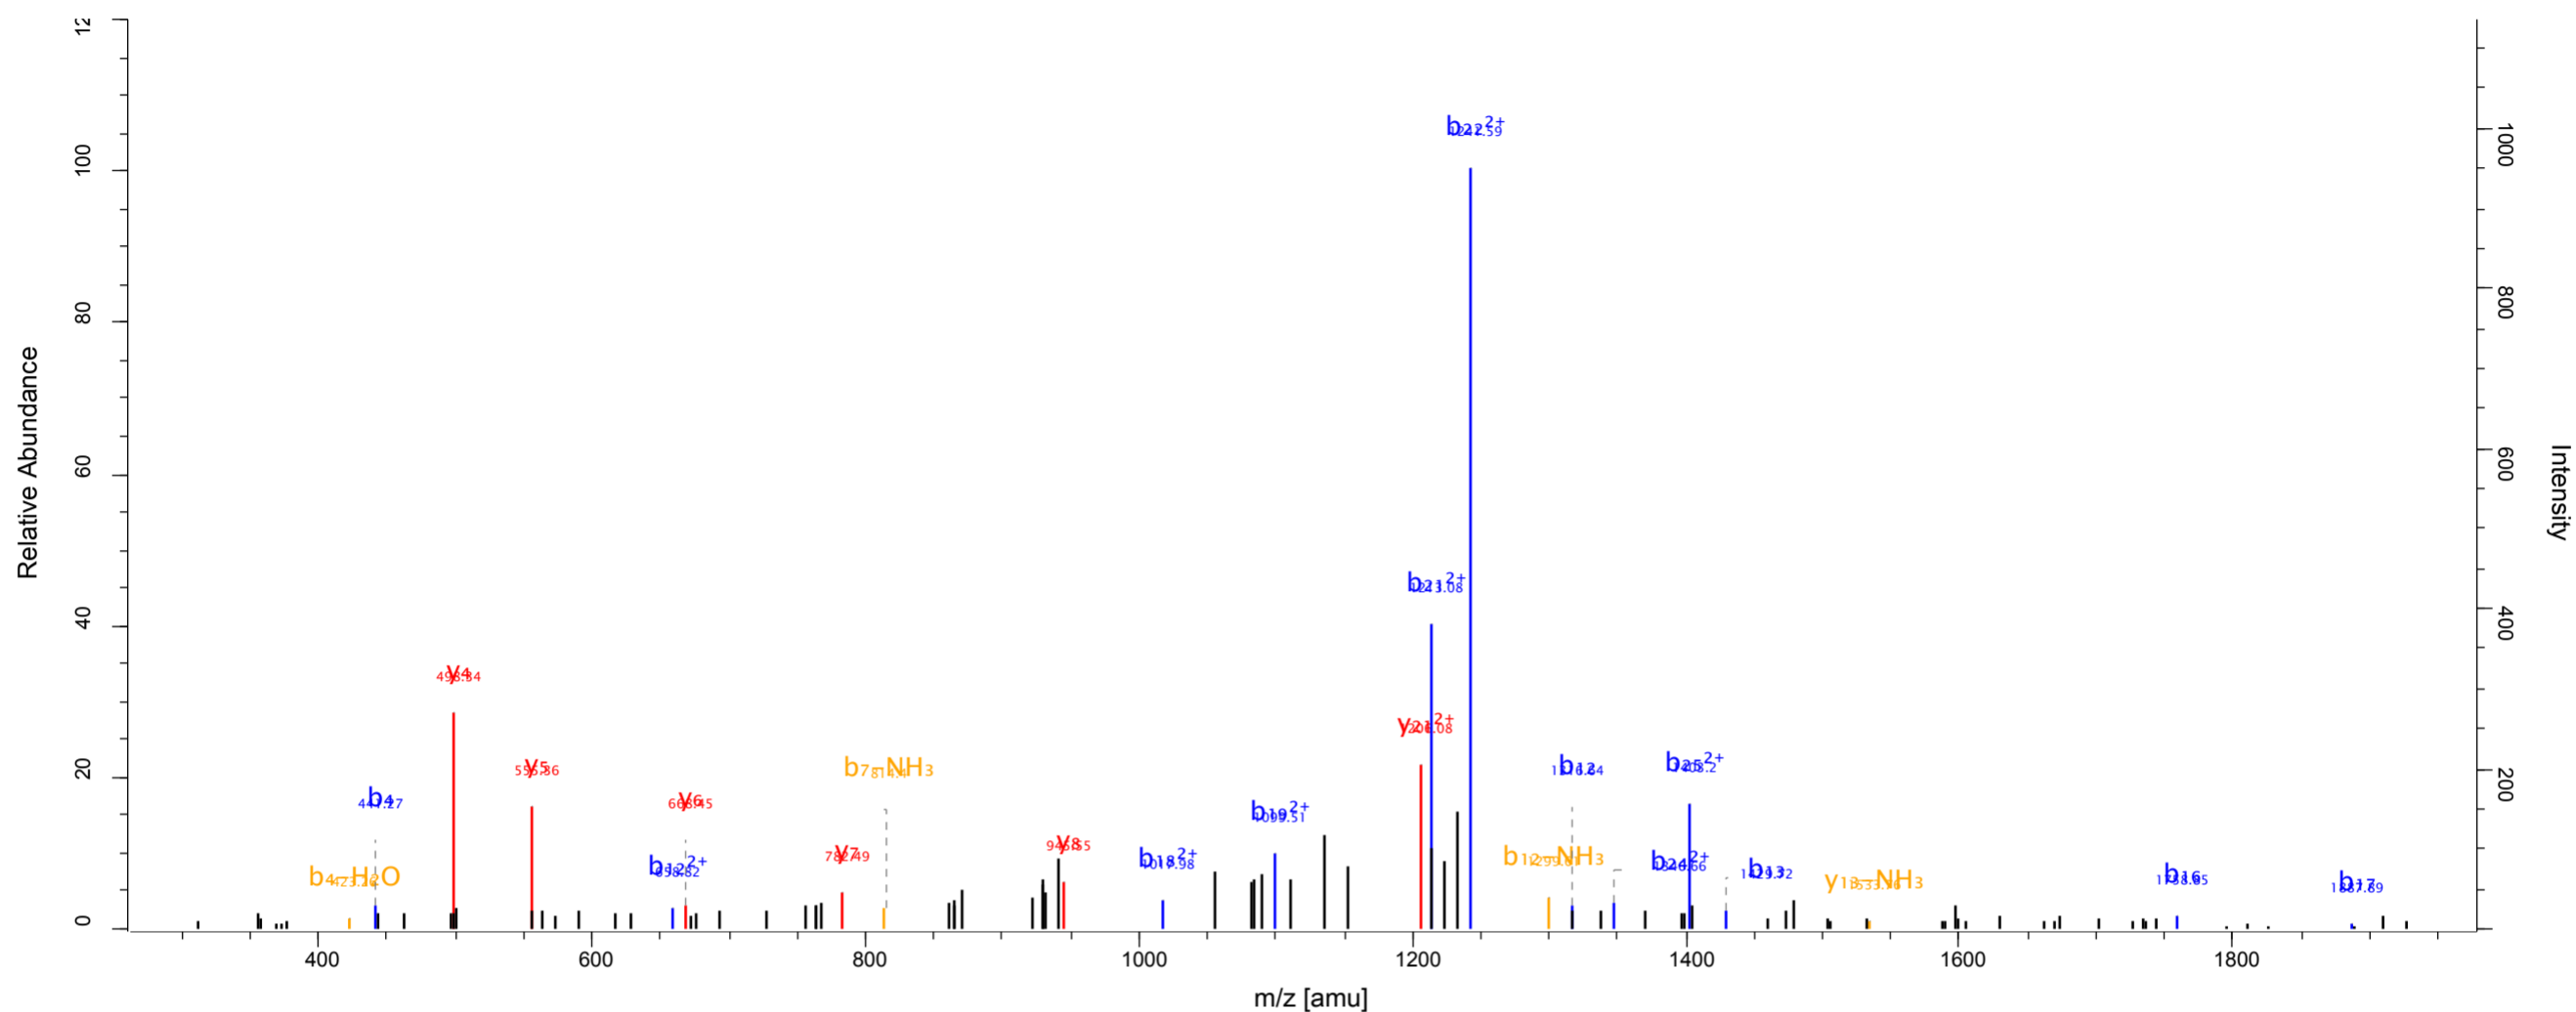

precursor information

|                   |                  |
|-------------------|------------------|
| Mass:             | 2078.4042        |
| m/z:              | 1002.82867       |
| Charge:           | 2+               |
| Retention time:   | 113.787322008047 |
| Score:            | 86.62476         |
| Mass Error (ppm): | 0.16602          |
| PEP:              | 0.00017515       |
| Precursor Type:   | ISO              |

| b <sup>2+</sup> ion |              | b ion      |              |    |     |    | y ion        |            | y <sup>2+</sup> ion |            |
|---------------------|--------------|------------|--------------|----|-----|----|--------------|------------|---------------------|------------|
| Δ dalton            | mass         | Δ dalton   | mass         |    | seq |    | Δ dalton     | mass       | Δ dalton            | mass       |
|                     | 114.09134045 |            | 114.09134045 | 1  | I   | 25 |              |            |                     |            |
|                     | 213.15975436 |            | 213.15975436 | 2  | V   | 24 | 2866.4179025 |            | 2866.4179025        |            |
|                     | 326.24381834 |            | 326.24381834 | 3  | I   | 23 | 2767.3494886 |            | 2767.3494886        |            |
|                     | 441.27076138 | +0.0036222 | 441.27076138 | 4  | D   | 22 | 2654.2654246 |            | 2654.2654246        |            |
|                     | 569.36572439 |            | 569.36572439 | 5  | K   | 21 | 2539.2384816 |            | 2539.2384816        |            |
|                     | 684.39266743 |            | 684.39266743 | 6  | D   | 20 | 2411.1435185 |            | 1206.0753975        | +0.3162041 |
|                     | 831.42806665 |            | 831.42806665 | 7  | M   | 19 | 2296.1165755 |            | 2296.1165755        |            |
|                     | 902.46518044 |            | 902.46518044 | 8  | A   | 18 | 2149.0811763 |            | 2149.0811763        |            |
|                     | 1031.5077735 |            | 1031.5077735 | 9  | E   | 17 | 2078.0440625 |            | 2078.0440625        |            |
|                     | 1160.5503666 |            | 1160.5503666 | 10 | E   | 16 | 1949.0014694 |            | 1949.0014694        |            |
|                     | 1217.5718304 |            | 1217.5718304 | 11 | G   | 15 | 1819.9588763 |            | 1819.9588763        |            |
| -0.3191827          | 658.82376037 | -0.2690285 | 1316.6402443 | 12 | V   | 14 | 1762.9374126 |            | 1762.9374126        |            |
|                     | 1429.7243083 | -0.2705729 | 1429.7243083 | 13 | I   | 13 | 1663.8689987 |            | 1663.8689987        |            |
|                     | 1558.7669014 |            | 1558.7669014 | 14 | E   | 12 | 1550.7849347 |            | 1550.7849347        |            |
|                     | 1687.8094944 |            | 1687.8094944 | 15 | E   | 11 | 1421.7423416 |            | 1421.7423416        |            |
|                     | 1758.8466082 | -0.3517352 | 1758.8466082 | 16 | A   | 10 | 1292.6997485 |            | 1292.6997485        |            |
|                     | 1887.8892013 | -0.3468429 | 1887.8892013 | 17 | E   | 9  | 1221.6626347 |            | 1221.6626347        |            |
| +0.1039799          | 1017.9824459 |            | 2034.9576152 | 18 | F   | 8  | 1092.6200416 |            | 1092.6200416        |            |
| -0.2189441          | 1099.5141101 |            | 2198.0209438 | 19 | Y   | 7  | 945.55162768 | +0.0803303 | 945.55162768        |            |
|                     | 2312.0638712 |            | 2312.0638712 | 20 | N   | 6  | 782.48829914 | -0.0407894 | 782.48829914        |            |
| -0.1089779          | 1213.0776058 |            | 2425.1479352 | 21 | I   | 5  | 668.4453717  | -0.0423566 | 668.4453717         |            |
| +0.0229904          | 1241.5883377 |            | 2482.1693989 | 22 | G   | 4  | 555.36130772 | +0.0805868 | 555.36130772        |            |
|                     | 2579.2221628 |            | 2579.2221628 | 23 | P   | 3  | 498.33984399 | -0.0859072 | 498.33984399        |            |
| -0.0339489          | 1346.6567516 |            | 2692.3062268 | 24 | I   | 2  | 401.28708014 |            | 401.28708014        |            |
| -0.0463178          | 1403.1987836 |            | 2805.3902907 | 25 | I   | 1  | 288.20301616 |            | 288.20301616        |            |
|                     |              |            |              | 26 | R   | 0  | 175.11895218 |            | 175.11895218        |            |

general information

|                       |            |
|-----------------------|------------|
| Annotation:           | 16 of 26   |
| AminoAcids Coverage:  | 62 %       |
| Intensity Coverage:   | 54 %       |
| Peak Coverage:        | 22 %       |
| Protein Localisation: | 97 ... 122 |

Scan number 11135 Raw file 20091027\_Orbi6\_MaHe\_SA\_ADH\_exp3\_FN\_Gel06  
 Method ITMS; CID Genenames GPR89A;GPR89B;GPR89C

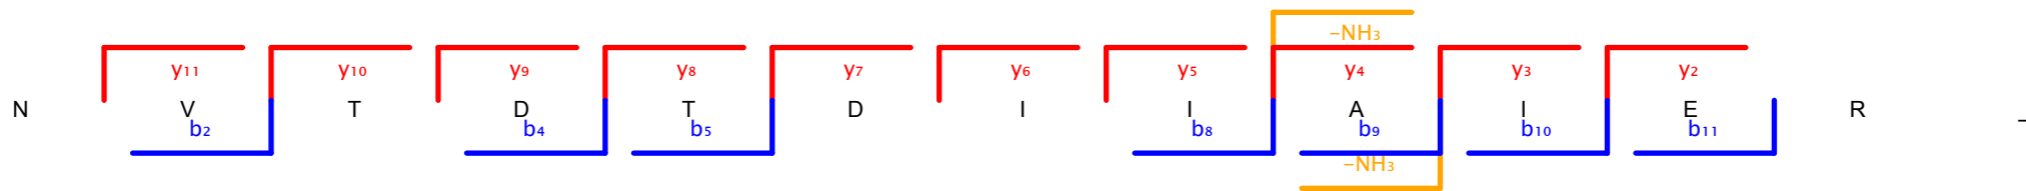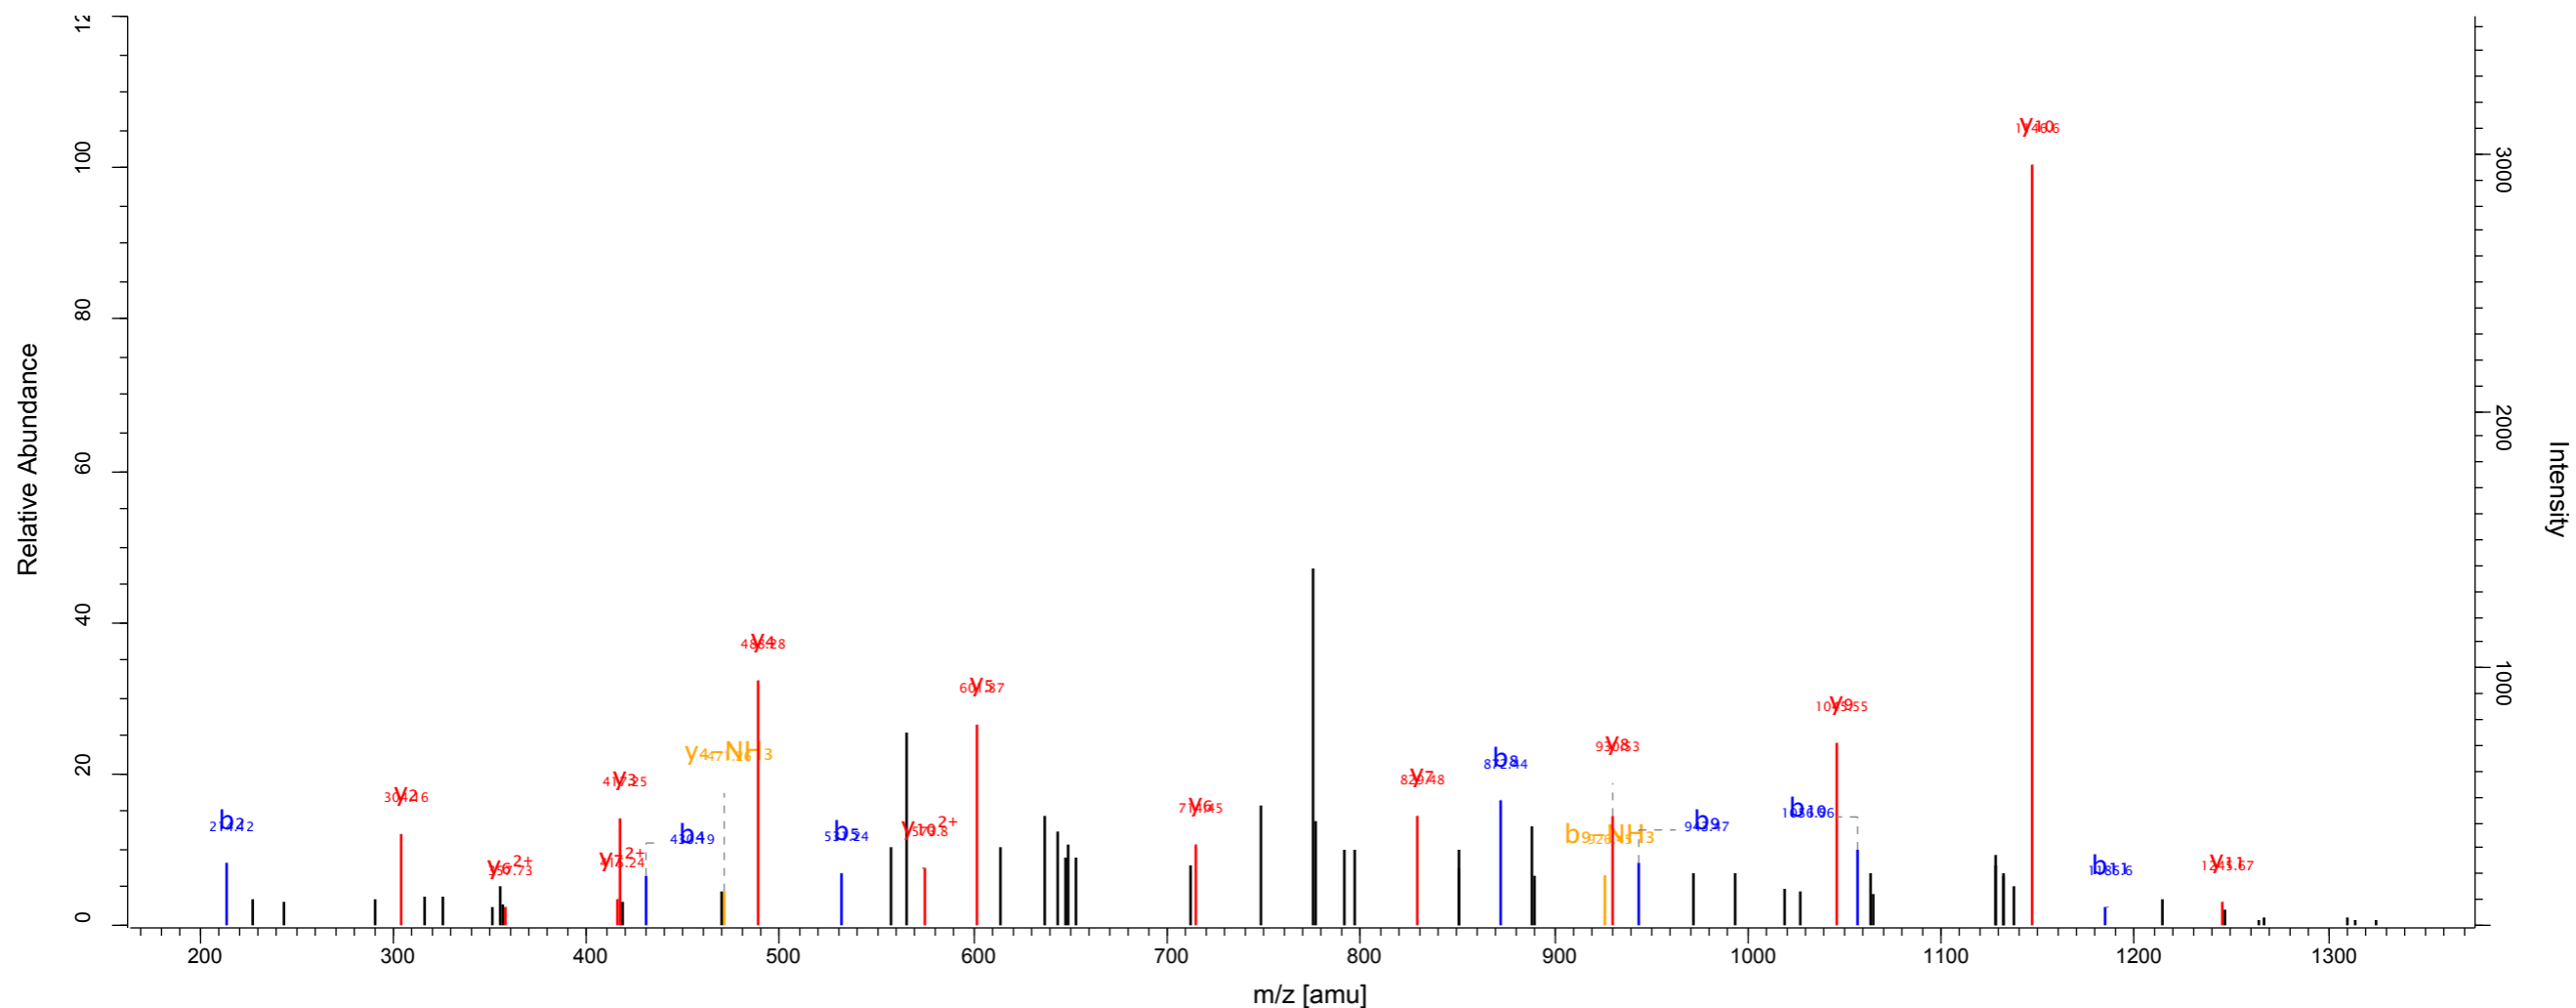

precursor information

|                   |                  |
|-------------------|------------------|
| Mass:             | 1258.70410       |
| m/z:              | 680.35027        |
| Charge:           | 2+               |
| Retentiontime:    | 71.0214102172852 |
| Score:            | 124.8560         |
| Mass Error (ppm): | 0.022872         |
| PEP:              | 0.00011020       |
| Precursor Type:   | MULTI            |

general information

|                       |             |
|-----------------------|-------------|
| Annotation:           | 10 of 12    |
| AminoAcids Coverage:  | 82 %        |
| Intensity Coverage:   | 48 %        |
| Peak Coverage:        | 22 %        |
| Protein Localisation: | 180 ... 191 |

| b ion      |                |    |     |    | y ion          |            | y <sup>2+</sup> ion |            |
|------------|----------------|----|-----|----|----------------|------------|---------------------|------------|
| Δ dalton   | mass           |    | seq |    | Δ dalton       | mass       | Δ dalton            | mass       |
|            | 115.050203914  | 1  | N   | 11 |                |            |                     |            |
| -0.085903  | 214.11861783   | 2  | V   | 10 | 1245.668507935 | +0.0548807 | 1245.668507935      |            |
|            | 315.166296304  | 3  | T   | 9  | 1146.60094018  | -0.0881311 | 573.803685242       | +0.2909803 |
| -0.0188009 | 430.193239336  | 4  | D   | 8  | 1045.552415544 | +0.0259536 | 1045.552415544      |            |
| +0.1027712 | 531.24091781   | 5  | T   | 7  | 930.525472512  | +0.142069  | 930.525472512       |            |
|            | 646.267860842  | 6  | D   | 6  | 829.477794038  | -0.2129015 | 415.242535252       | -0.0092589 |
|            | 759.351924823  | 7  | I   | 5  | 714.450851006  | -0.0861659 | 357.729063736       | +0.2903454 |
| -0.0892481 | 872.435988803  | 8  | I   | 4  | 601.366787026  | +0.0489234 | 601.366787026       |            |
| -0.031025  | 943.473102591  | 9  | A   | 3  | 488.282723045  | -0.0282675 | 488.282723045       |            |
| -0.0708384 | 1056.557166571 | 10 | I   | 2  | 417.245609258  | +0.0014611 | 417.245609258       |            |
| -0.2458778 | 1185.599759667 | 11 | E   | 1  | 304.161545277  | +0.0825343 | 304.161545277       |            |
|            |                | 12 | R   | 0  | 175.118952181  |            | 175.118952181       |            |

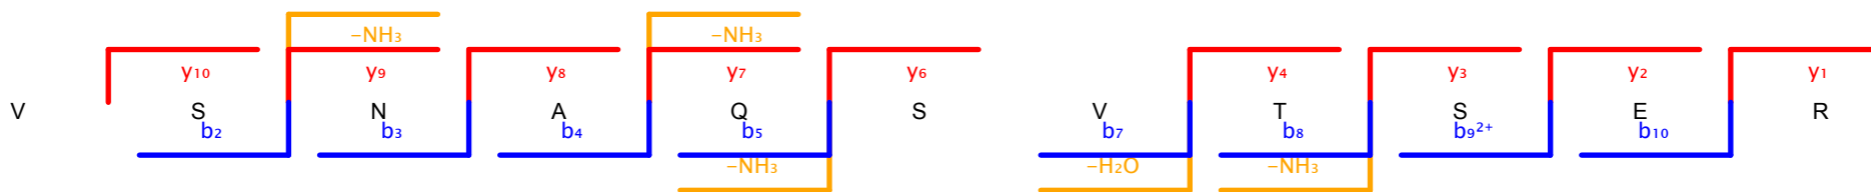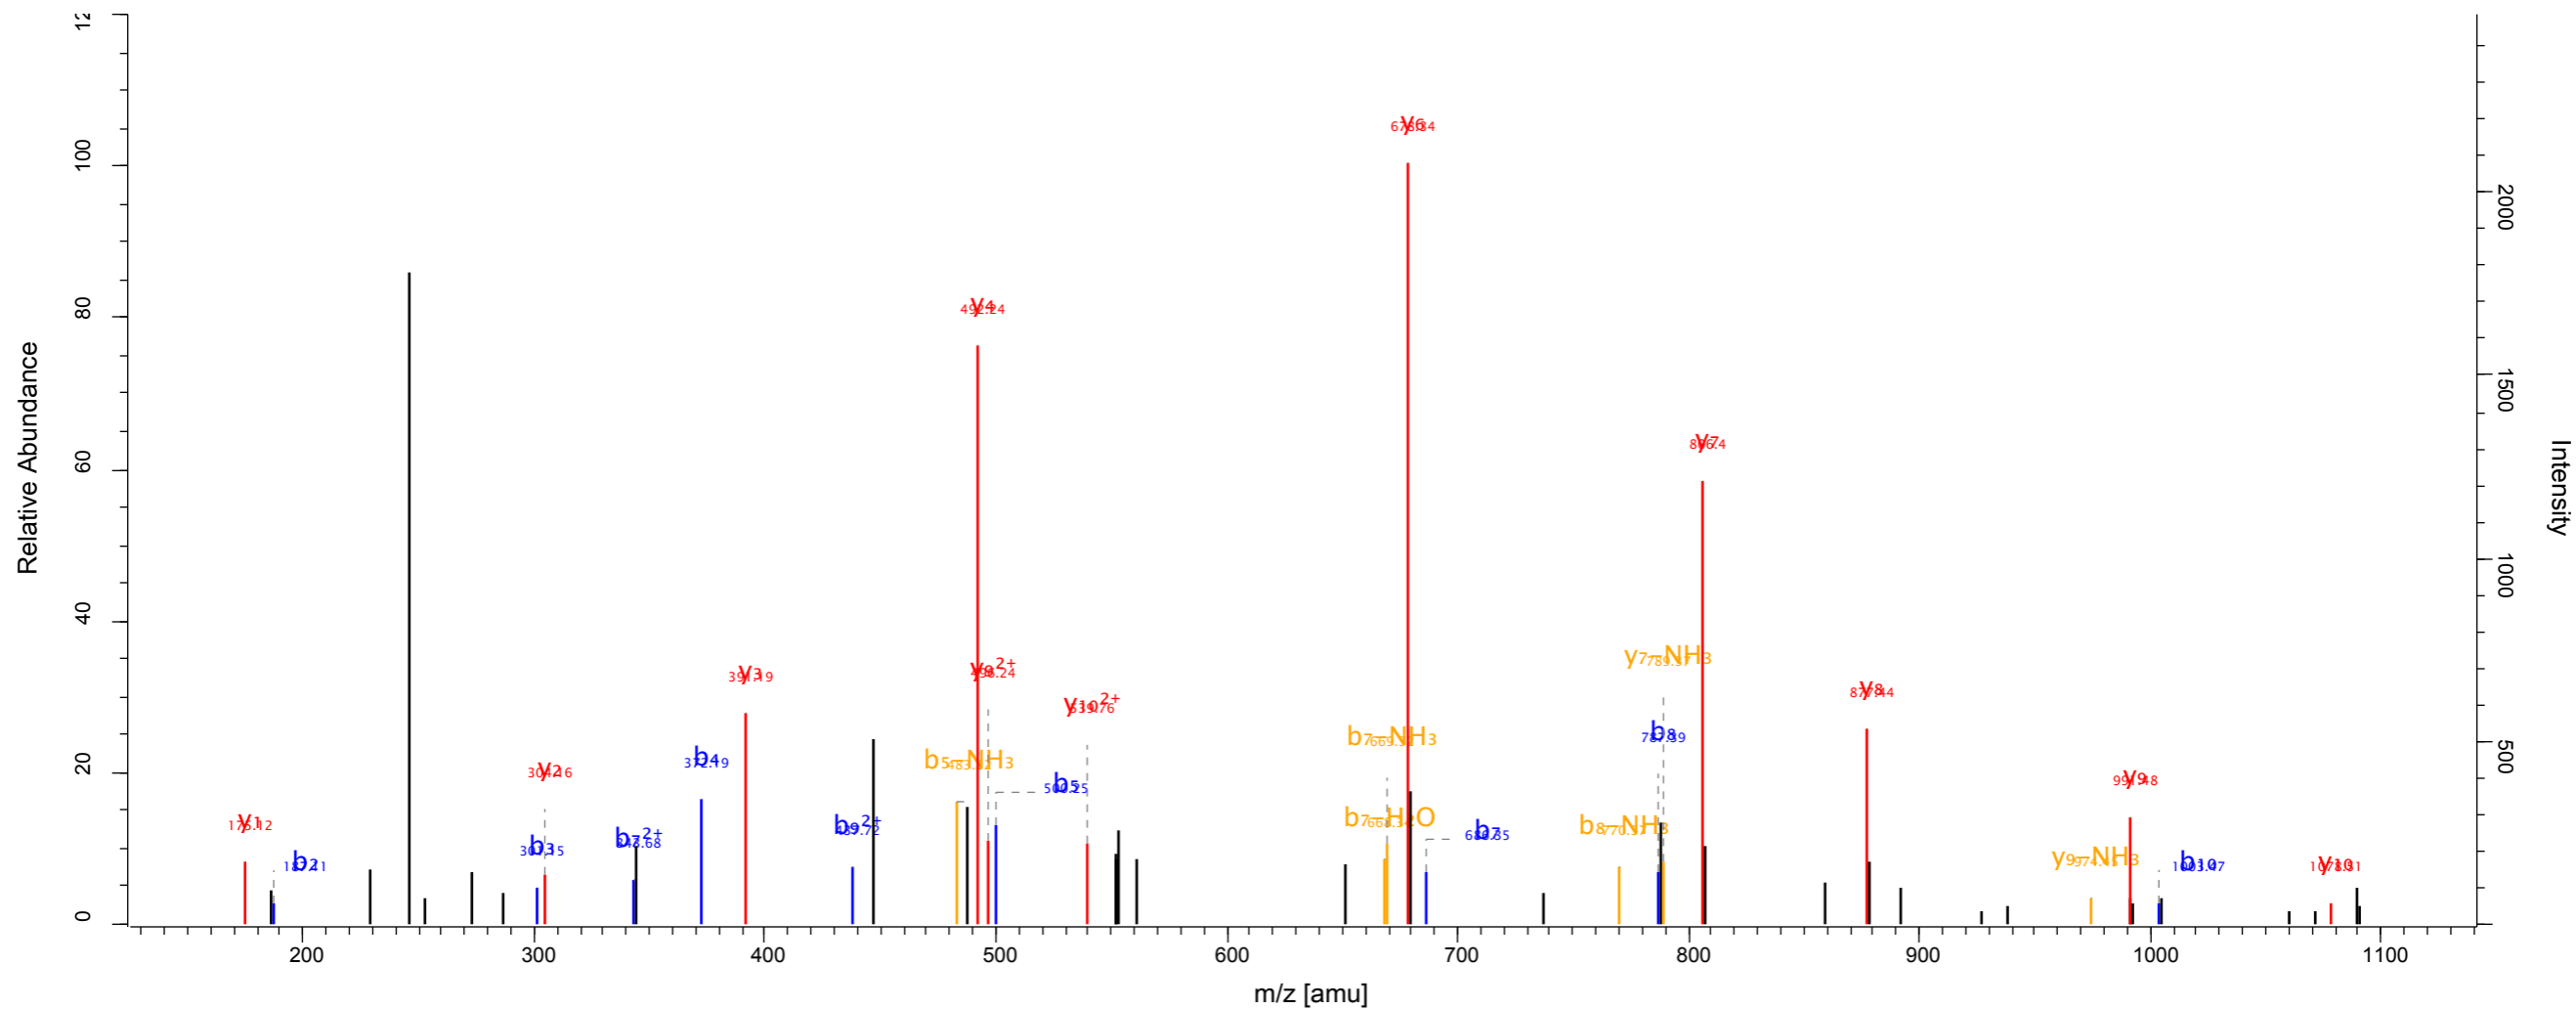

precursor information

|                   |                  |
|-------------------|------------------|
| Mass:             | 1176.57367       |
| m/z:              | 580.20411        |
| Charge:           | 2+               |
| Retention time:   | 21.8120214788818 |
| Score:            | 177.4302         |
| Mass Error (ppm): | 0.15047          |
| PEP:              | 3.2764E-08       |
| Precursor Type:   | MULTI            |

general information

|                       |             |
|-----------------------|-------------|
| Annotation:           | 10 of 11    |
| AminoAcids Coverage:  | 91 %        |
| Intensity Coverage:   | 61 %        |
| Peak Coverage:        | 46 %        |
| Protein Localisation: | 464 ... 474 |

| b <sup>2+</sup> ion |              | b ion      |              |    |     |    | y ion        |            | y <sup>2+</sup> ion |            |
|---------------------|--------------|------------|--------------|----|-----|----|--------------|------------|---------------------|------------|
| Δ dalton            | mass         | Δ dalton   | mass         |    | seq |    | Δ dalton     | mass       | Δ dalton            | mass       |
|                     | 100.07569038 |            | 100.07569038 | 1  | V   | 10 |              |            |                     |            |
|                     | 187.10771879 | +0.088555  | 187.10771879 | 2  | S   | 9  | 1078.5123416 | -0.070203  | 539.75980906        | +0.0410943 |
|                     | 301.15064624 | -0.0960808 | 301.15064624 | 3  | N   | 8  | 991.48031323 | +0.1044646 | 496.24379485        | -0.0244955 |
|                     | 372.18776003 | +0.0804284 | 372.18776003 | 4  | A   | 7  | 877.43738579 | +0.0574262 | 877.43738579        |            |
|                     | 500.24633754 | +0.0088504 | 500.24633754 | 5  | Q   | 6  | 806.400272   | +0.0551113 | 806.400272          |            |
|                     | 587.27836595 |            | 587.27836595 | 6  | S   | 5  | 678.34169449 | -0.0626418 | 678.34169449        |            |
| -0.3586078          | 343.67702817 | +0.027915  | 686.34677987 | 7  | V   | 4  | 591.30966608 |            | 591.30966608        |            |
|                     | 787.39445834 | -0.1791873 | 787.39445834 | 8  | T   | 3  | 492.24125216 | -0.0614426 | 492.24125216        |            |
| +0.3515998          | 437.71688161 |            | 874.42648675 | 9  | S   | 2  | 391.19357369 | +0.0273125 | 391.19357369        |            |
|                     | 1003.4690798 | -0.2235354 | 1003.4690798 | 10 | E   | 1  | 304.16154528 | +0.0459132 | 304.16154528        |            |
|                     |              |            |              | 11 | R   | 0  | 175.11895218 | +0.0031639 | 175.11895218        |            |

Scan number 19774 Raw file 20091027\_Orbi6\_MaHe\_SA\_ADH\_exp3\_FN\_Gel08  
 Method ITMS; CID Genenames SLC41A3

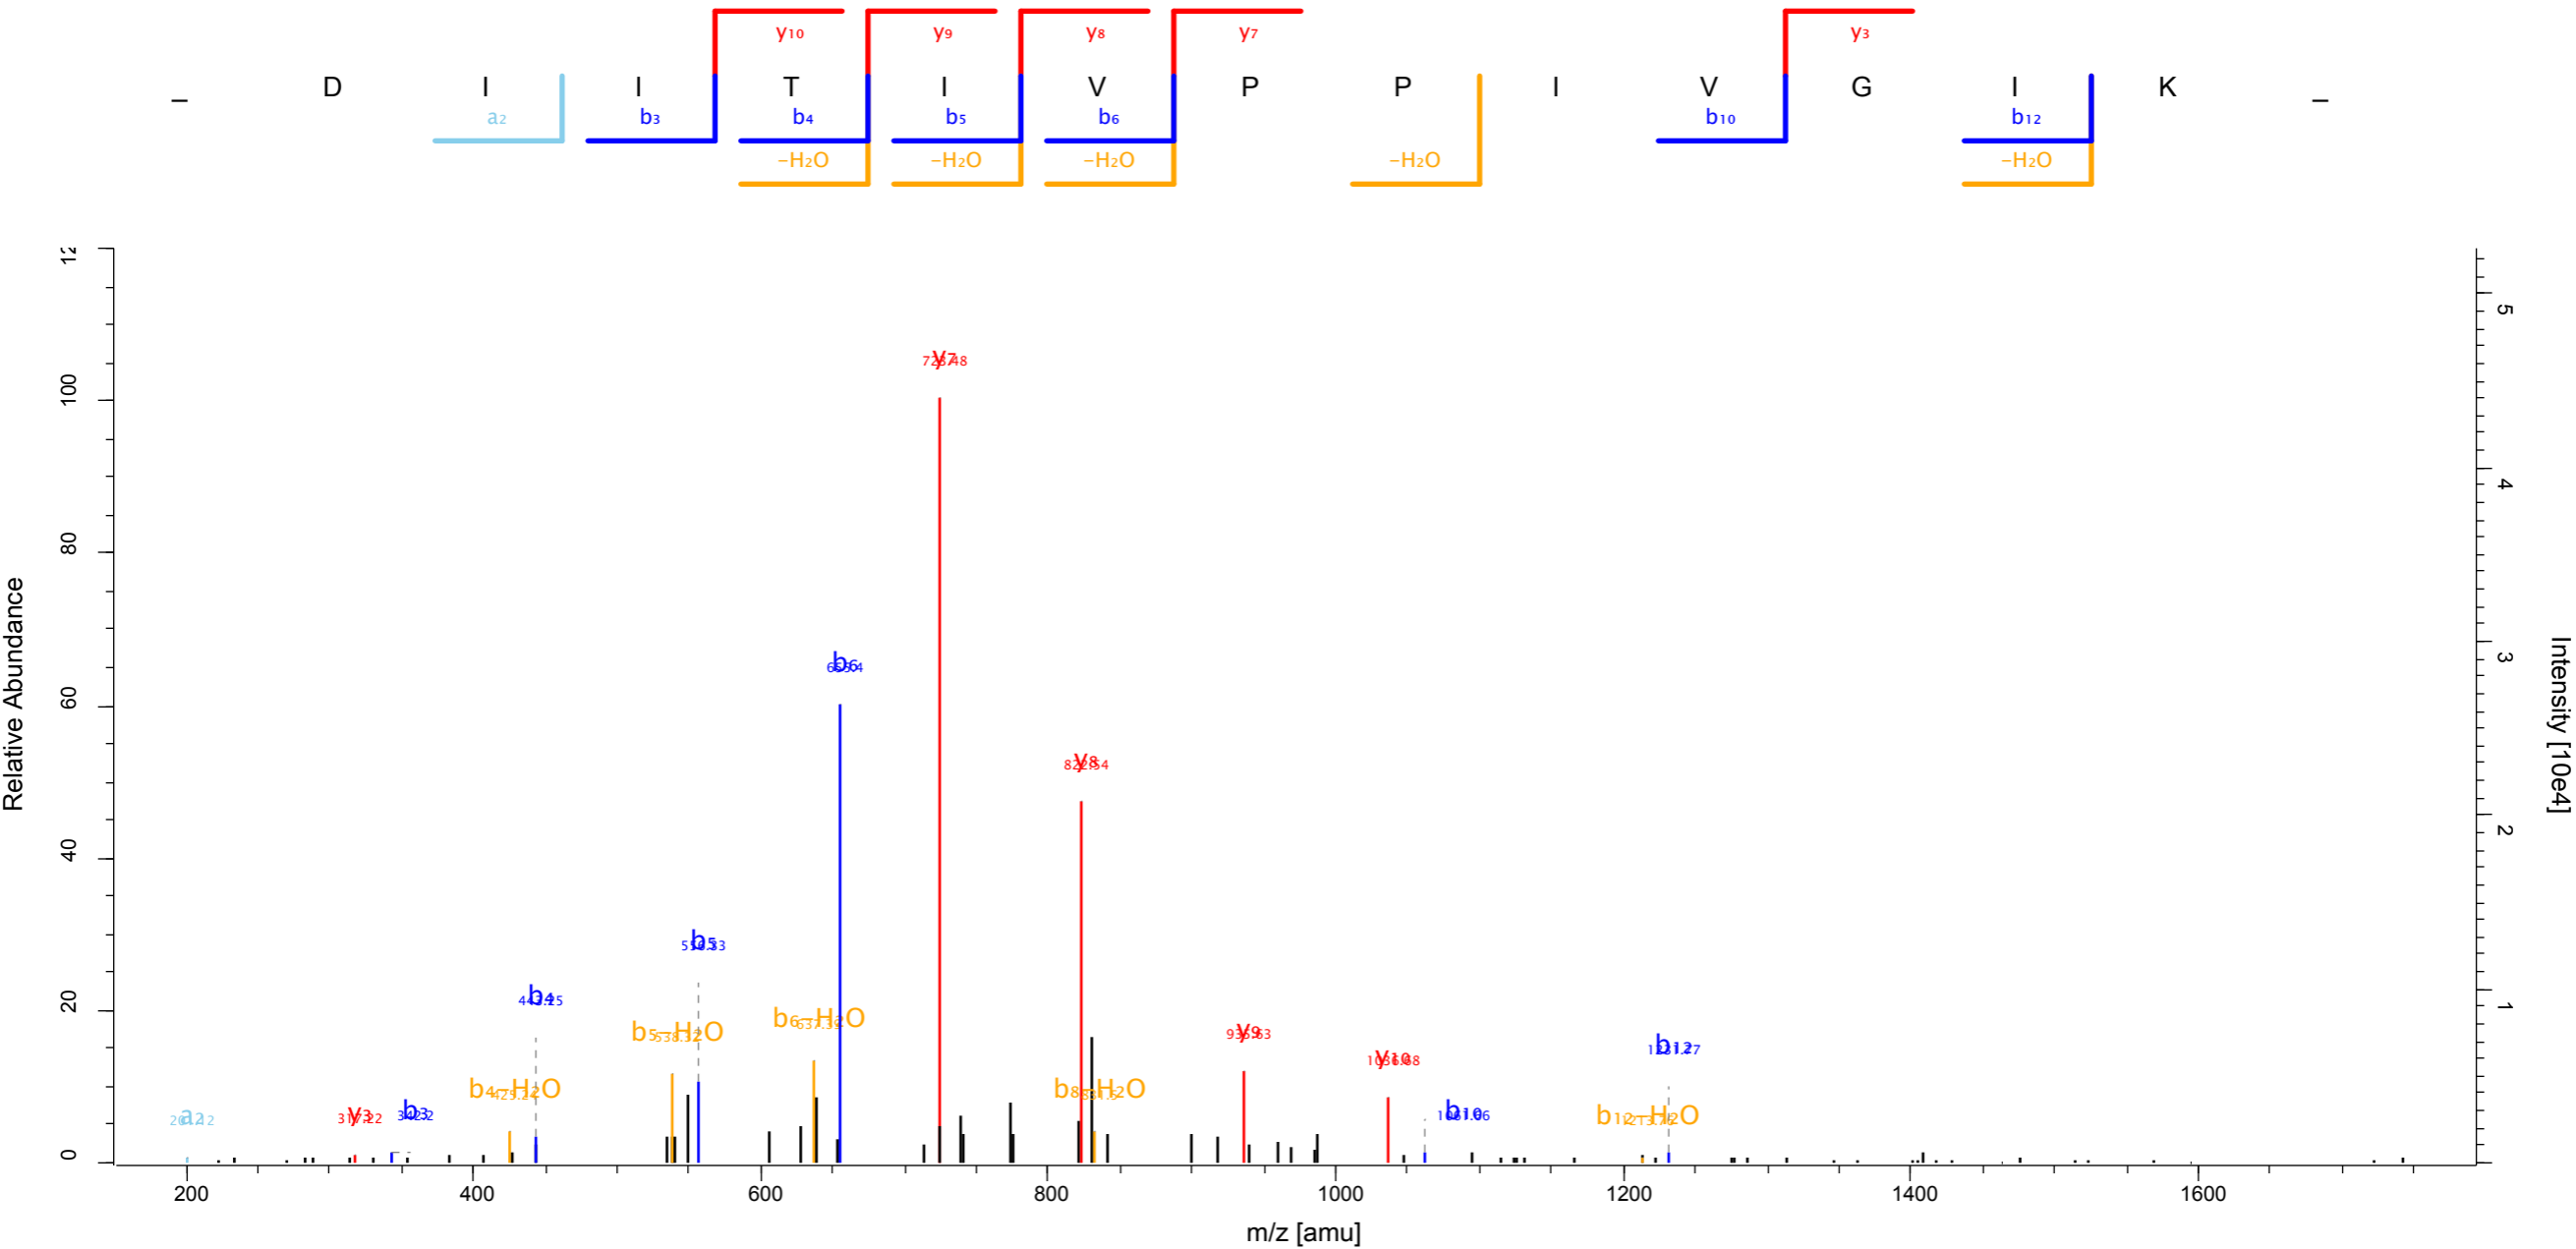

precursor information

|                   |                  |
|-------------------|------------------|
| Mass:             | 2752.40802       |
| m/z:              | 680.25051        |
| Charge:           | 4+               |
| Retention time:   | 118.871063500077 |
| Score:            | 135.6624         |
| Mass Error (ppm): | 0.14638          |
| PEP:              | 1.1101E-21       |
| Precursor Type:   | MULTI            |

general information

|                       |             |
|-----------------------|-------------|
| Annotation:           | 10 of 12    |
| AminoAcids Coverage:  | 77 %        |
| Intensity Coverage:   | 67 %        |
| Peak Coverage:        | 21 %        |
| Protein Localisation: | 101 ... 113 |

| a ion           |                | b ion           |                |     | y ion |                 |                |            |
|-----------------|----------------|-----------------|----------------|-----|-------|-----------------|----------------|------------|
| $\Delta$ dalton | mass           | $\Delta$ dalton | mass           | seq |       | $\Delta$ dalton | mass           |            |
|                 | 88.039304876   |                 | 116.034219499  | 1   | D     | 12              |                |            |
| +0.1874222      | 201.123368857  |                 | 229.118283479  | 2   | I     | 11              | 1262.844621807 |            |
|                 | 314.207432837  | -0.0402686      | 342.202347459  | 3   | I     | 10              | 1149.760557826 |            |
|                 | 415.255111311  | -0.0343277      | 443.250025933  | 4   | T     | 9               | 1036.676493846 | -0.1209519 |
|                 | 528.339175292  | -0.0851885      | 556.334089914  | 5   | I     | 8               | 935.628815372  | -0.1051948 |
|                 | 627.407589208  | -0.1824721      | 655.40250383   | 6   | V     | 7               | 822.544751391  | -0.1052372 |
|                 | 724.46035306   |                 | 752.455267682  | 7   | P     | 6               | 723.476337475  | -0.0644112 |
|                 | 821.513116912  |                 | 849.508031534  | 8   | P     | 5               | 626.423573623  |            |
|                 | 934.597180892  |                 | 962.592095515  | 9   | I     | 4               | 529.370809771  |            |
|                 | 1033.665594809 | -0.3502067      | 1061.660509431 | 10  | V     | 3               | 416.286745791  |            |
|                 | 1090.687058532 |                 | 1118.681973154 | 11  | G     | 2               | 317.218331875  | -0.0318084 |
|                 | 1203.771122513 | -0.0153047      | 1231.766037135 | 12  | I     | 1               | 260.196868151  |            |
|                 |                |                 |                | 13  | K     | 0               | 147.112804171  |            |

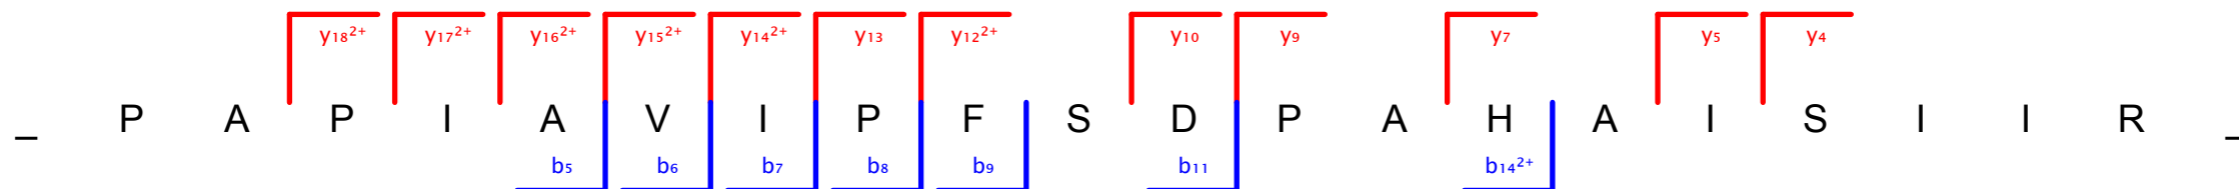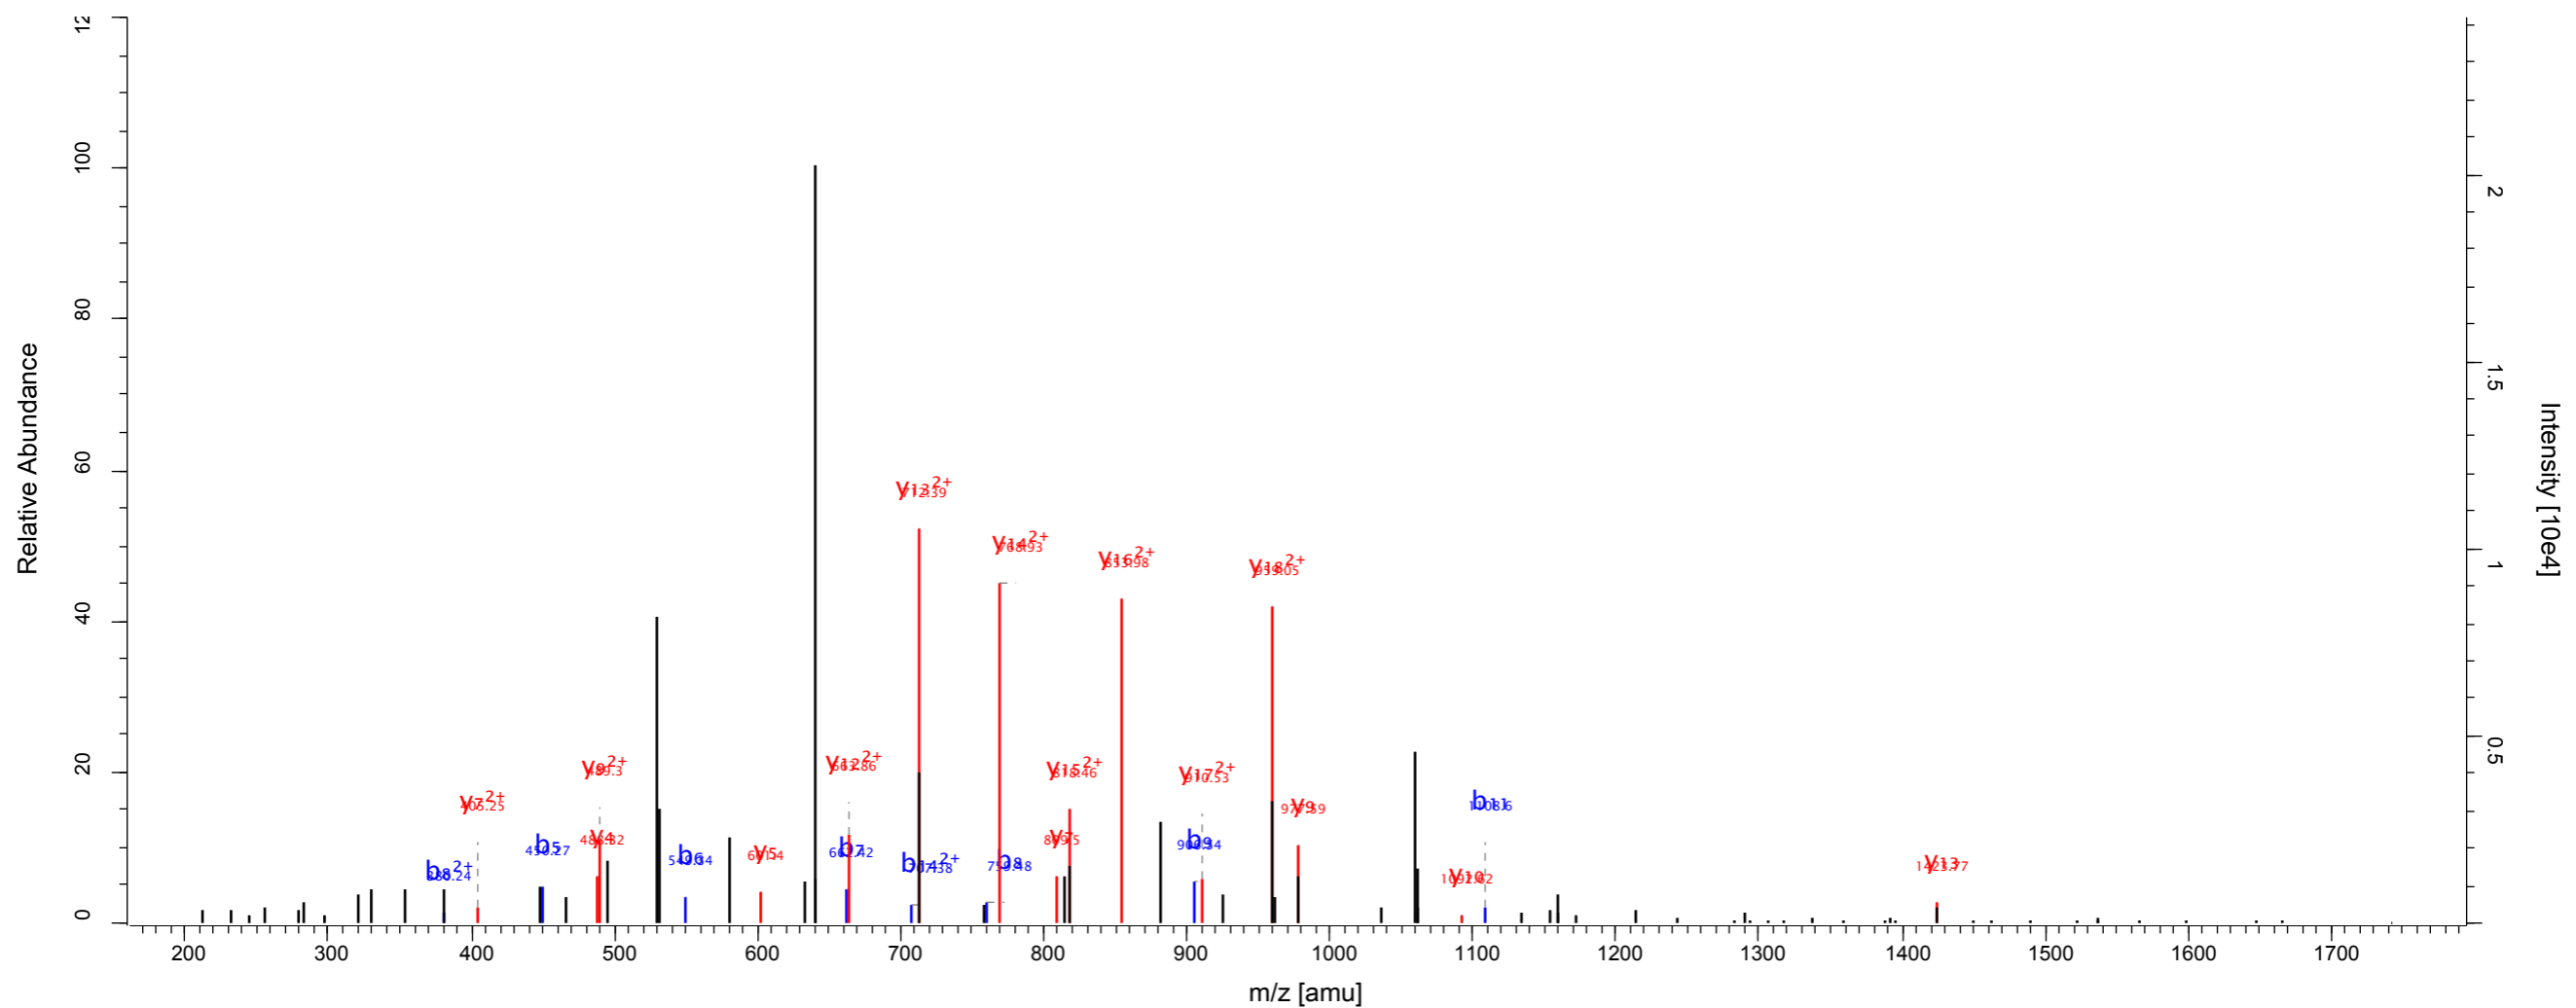

precursor information

|                   |                  |
|-------------------|------------------|
| Mass:             | 2084.17844       |
| m/z:              | 605.72242        |
| Charge:           | 2+               |
| Potentiation:     | 117.268278503418 |
| Score:            | 106.2000         |
| Mass Error (ppm): | 0.00206          |
| DEP:              | 2.642507         |
| Precursor Type:   | MULTI            |

| b <sup>2+</sup> ion |              | b ion      |              |    |     |    | y ion        |            | y <sup>2+</sup> ion |            |
|---------------------|--------------|------------|--------------|----|-----|----|--------------|------------|---------------------|------------|
| Δ dalton            | mass         | Δ dalton   | mass         |    | seq |    | Δ dalton     | mass       | Δ dalton            | mass       |
|                     | 98.060040319 |            | 98.060040319 | 1  | P   | 19 |              |            |                     |            |
|                     | 169.09715411 |            | 169.09715411 | 2  | A   | 18 | 1988.1327583 |            | 1988.1327583        |            |
|                     | 266.14991796 |            | 266.14991796 | 3  | P   | 17 | 1917.0956445 |            | 959.05146051        | -0.0763629 |
|                     | 379.23398194 |            | 379.23398194 | 4  | I   | 16 | 1820.0428807 |            | 910.52507858        | +0.0773994 |
|                     | 450.27109573 | -0.059731  | 450.27109573 | 5  | A   | 15 | 1706.9588167 |            | 853.98304659        | +0.1023416 |
|                     | 549.33950964 | -0.3539139 | 549.33950964 | 6  | V   | 14 | 1635.9217029 |            | 818.4644897         | -0.110852  |
|                     | 662.42357362 | -0.1685077 | 662.42357362 | 7  | I   | 13 | 1536.853289  |            | 768.93028274        | +0.1103667 |
| -0.1154642          | 380.24180697 | +0.3170585 | 759.47633748 | 8  | P   | 12 | 1423.769225  | -0.0366811 | 712.38825075        | +0.0586487 |
|                     | 906.54475139 | -0.3975346 | 906.54475139 | 9  | F   | 11 | 1326.7164612 |            | 663.86186882        | -0.3113927 |
|                     | 993.5767798  |            | 993.5767798  | 10 | S   | 10 | 1179.6480473 |            | 1179.6480473        |            |
|                     | 1108.6037228 | -0.0597775 | 1108.6037228 | 11 | D   | 9  | 1092.6160189 | +0.2042936 | 1092.6160189        |            |
|                     | 1205.6564867 |            | 1205.6564867 | 12 | P   | 8  | 977.58907582 | +0.0232899 | 489.29817614        | +0.1637379 |
|                     | 1276.6936005 |            | 1276.6936005 | 13 | A   | 7  | 880.53631197 |            | 880.53631197        |            |
| +0.3745612          | 707.3798944  |            | 1413.7525123 | 14 | H   | 6  | 809.49919818 | -0.1580727 | 405.25323732        | +0.0208716 |
|                     | 1484.7896261 |            | 1484.7896261 | 15 | A   | 5  | 672.44028632 |            | 672.44028632        |            |
|                     | 1597.8736901 |            | 1597.8736901 | 16 | I   | 4  | 601.40317253 | -0.0764513 | 601.40317253        |            |
|                     | 1684.9057185 |            | 1684.9057185 | 17 | S   | 3  | 488.31910855 | +0.1694779 | 488.31910855        |            |
|                     | 1797.9897825 |            | 1797.9897825 | 18 | I   | 2  | 401.28708014 |            | 401.28708014        |            |
|                     | 1911.0738465 |            | 1911.0738465 | 19 | I   | 1  | 288.20301616 |            | 288.20301616        |            |
|                     |              |            |              | 20 | R   | 0  | 175.11895218 |            | 175.11895218        |            |

general information

|                       |          |
|-----------------------|----------|
| Annotation:           | 12 of 20 |
| AminoAcids Coverage:  | 60%      |
| Intensity Coverage:   | 44%      |
| Peak Coverage:        | 27%      |
| Protein Localisation: | 4 ... 23 |

Scan number 14817 Raw file 20091029\_Orbi6\_MaHe\_SA\_ADH\_exp3\_BSA\_Gel04  
 Method ITMS; CID Genenames WDYHV1;C8orf32

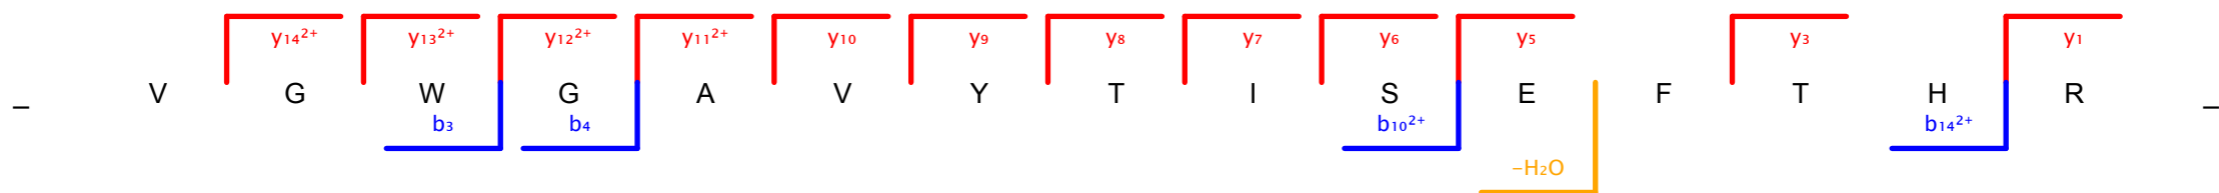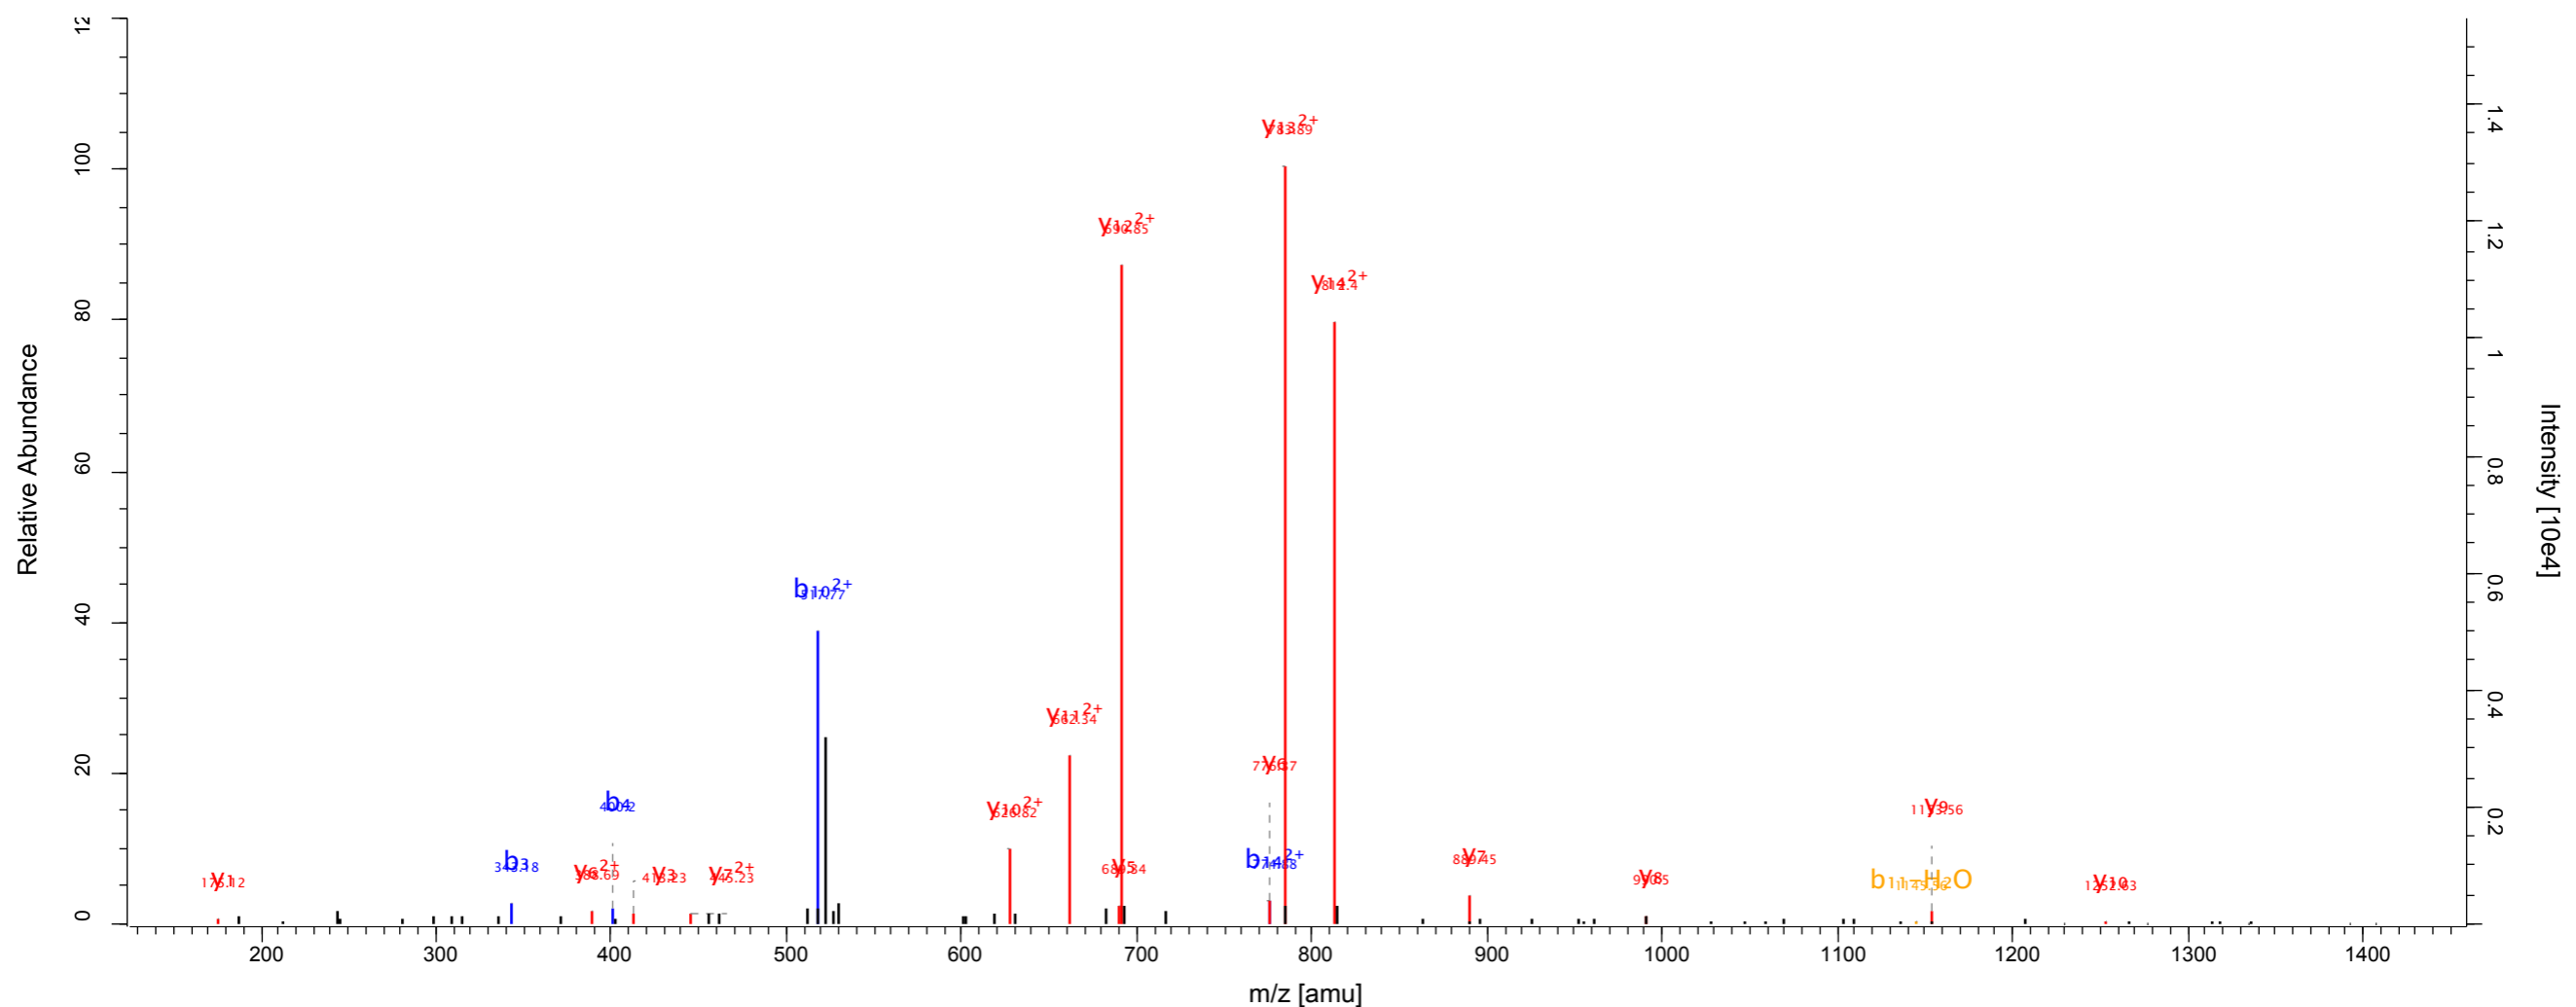

precursor information

|                   |                  |
|-------------------|------------------|
| Mass:             | 1721.85257       |
| m/z:              | 574.05212        |
| Charge:           | 2+               |
| Potentiation:     | 80.0715057641602 |
| Score:            | 117.7024         |
| Mass Error [ppm]: | 0.0077752        |
| PEP:              | 1.2502E-05       |
| Precursor Type:   | MULTI            |

general information

|                       |             |
|-----------------------|-------------|
| Annotation:           | 13 of 15    |
| AminoAcids Coverage:  | 87%         |
| Intensity Coverage:   | 82%         |
| Peak Coverage:        | 77%         |
| Protein Localisation: | 185 ... 199 |

| b <sup>2+</sup> ion |              | b ion      |              |    |     |    | y ion        |            | y <sup>2+</sup> ion |            |
|---------------------|--------------|------------|--------------|----|-----|----|--------------|------------|---------------------|------------|
| Δ dalton            | mass         | Δ dalton   | mass         |    | seq |    | Δ dalton     | mass       | Δ dalton            | mass       |
|                     | 100.07569038 |            | 100.07569038 | 1  | V   | 14 |              |            |                     |            |
|                     | 157.09715411 |            | 157.09715411 | 2  | G   | 13 | 1623.791417  |            | 812.39934675        | +0.1734682 |
|                     | 343.17646706 | -0.2112571 | 343.17646706 | 3  | W   | 12 | 1566.7699533 |            | 783.88861489        | +0.1757772 |
|                     | 400.19793078 | -0.0209288 | 400.19793078 | 4  | G   | 11 | 1380.6906404 |            | 690.84895841        | +0.1099649 |
|                     | 471.23504457 |            | 471.23504457 | 5  | A   | 10 | 1323.6691766 |            | 662.33822655        | +0.114044  |
|                     | 570.30345849 |            | 570.30345849 | 6  | V   | 9  | 1252.6320628 | +0.1605397 | 626.81966966        | +0.294283  |
|                     | 733.36678703 |            | 733.36678703 | 7  | Y   | 8  | 1153.5636489 | -0.0294692 | 1153.5636489        |            |
|                     | 834.4144655  |            | 834.4144655  | 8  | T   | 7  | 990.50032039 | +0.1446381 | 990.50032039        |            |
|                     | 947.49852948 |            | 947.49852948 | 9  | I   | 6  | 889.45264192 | -0.1620535 | 445.22995919        | +0.2334807 |
| -0.4071618          | 517.76891718 |            | 1034.5305579 | 10 | S   | 5  | 776.36857794 | +0.1436901 | 388.6879272         | -0.0390625 |
|                     | 1163.573151  |            | 1163.573151  | 11 | E   | 4  | 689.33654953 | -0.0864275 | 689.33654953        |            |
|                     | 1310.6415649 |            | 1310.6415649 | 12 | F   | 3  | 560.29395643 |            | 560.29395643        |            |
|                     | 1411.6892434 |            | 1411.6892434 | 13 | T   | 2  | 413.22554252 | +0.0957465 | 413.22554252        |            |
| +0.2684633          | 774.87771585 |            | 1548.7481552 | 14 | H   | 1  | 312.17786404 |            | 312.17786404        |            |
|                     |              |            |              | 15 | R   | 0  | 175.11895218 | +0.0062309 | 175.11895218        |            |

Scan number 8176 Raw file 20091029\_Orbi6\_MaHe\_SA\_ADH\_exp3\_BSA\_Gel04  
 Method ITMS; CID Genenames ZDHHC24

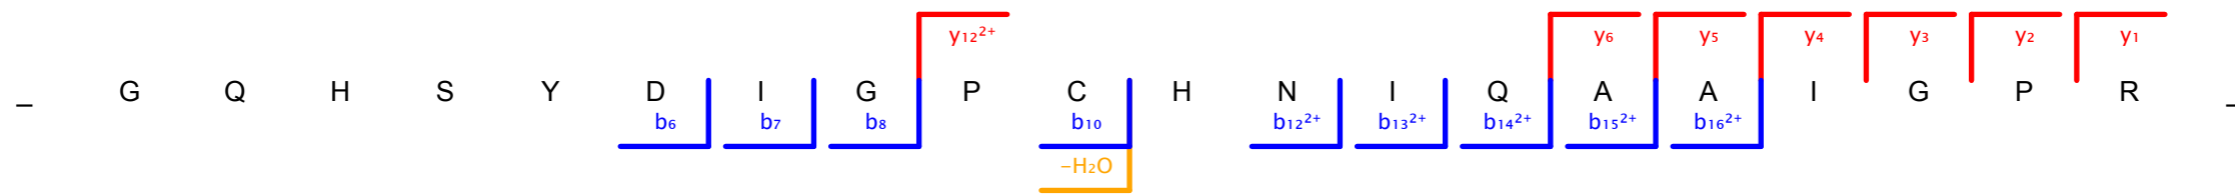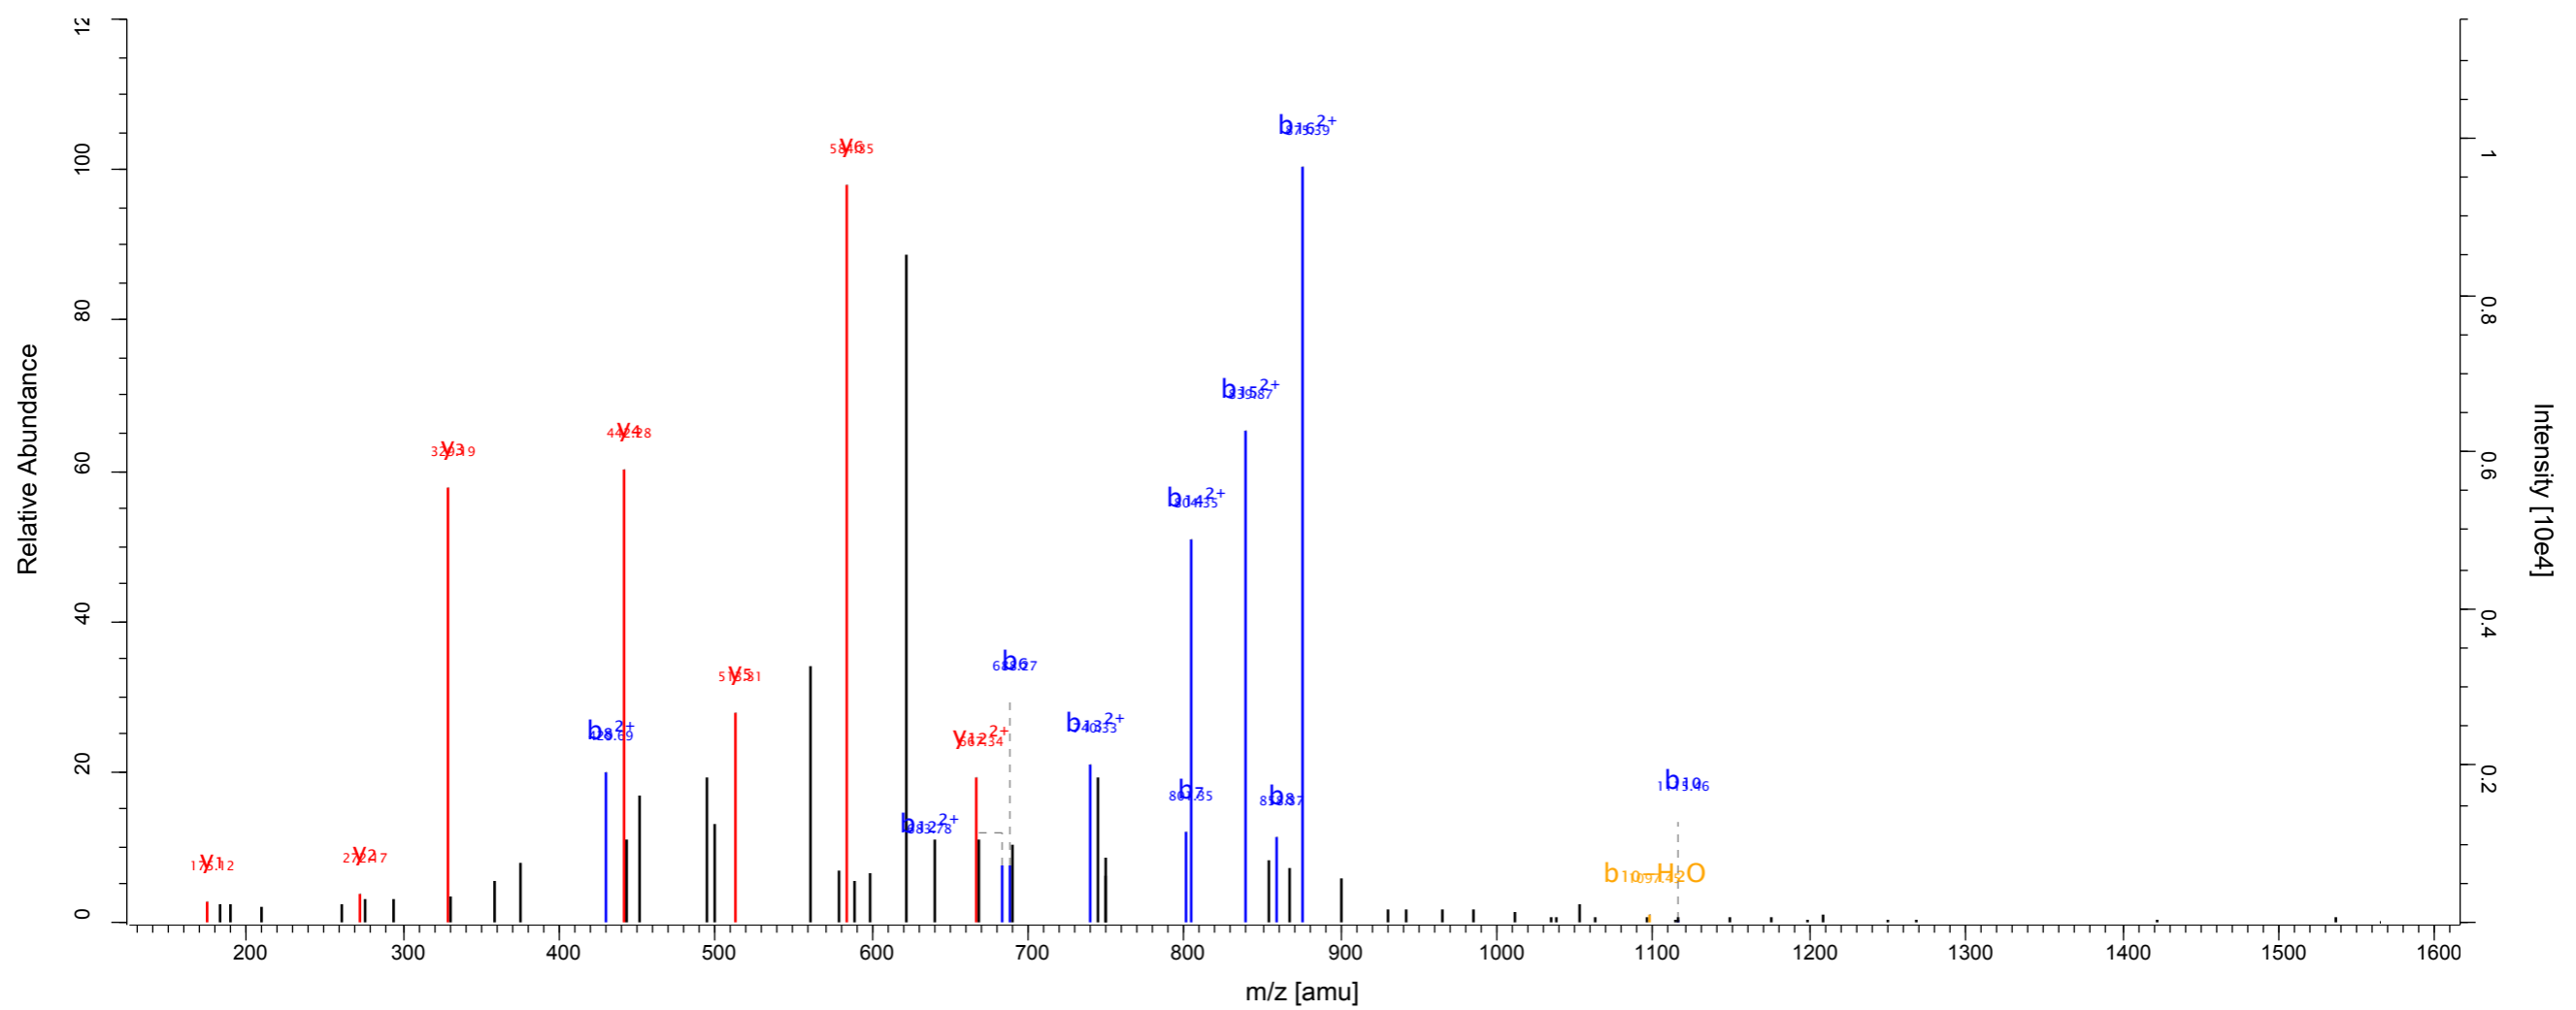

precursor information

|                   |                  |
|-------------------|------------------|
| Mass:             | 2100.0284        |
| m/z:              | 548.51688        |
| Charge:           | 4+               |
| Retention time:   | 54.1242421026035 |
| Score:            | 81.21728         |
| Mass Error (ppm): | -0.21411         |
| DEP:              | 0.00017026       |
| Precursor Type:   | MULTI            |

| b <sup>2+</sup> ion |              | b ion      |              |    |     | y ion |              | y <sup>2+</sup> ion |              |            |
|---------------------|--------------|------------|--------------|----|-----|-------|--------------|---------------------|--------------|------------|
| Δ dalton            | mass         | Δ dalton   | mass         |    | seq |       | Δ dalton     | mass                | Δ dalton     | mass       |
|                     | 58.02874019  |            | 58.02874019  | 1  | G   | 19    |              |                     |              |            |
|                     | 186.0873177  |            | 186.0873177  | 2  | Q   | 18    | 2134.0246812 |                     | 2134.0246812 |            |
|                     | 323.14622956 |            | 323.14622956 | 3  | H   | 17    | 2005.9661037 |                     | 2005.9661037 |            |
|                     | 410.17825797 |            | 410.17825797 | 4  | S   | 16    | 1868.9071919 |                     | 1868.9071919 |            |
|                     | 573.24158651 |            | 573.24158651 | 5  | Y   | 15    | 1781.8751634 |                     | 1781.8751634 |            |
|                     | 688.26852954 | -0.0145623 | 688.26852954 | 6  | D   | 14    | 1618.8118349 |                     | 1618.8118349 |            |
|                     | 801.35259352 | -0.0867244 | 801.35259352 | 7  | I   | 13    | 1503.7848919 |                     | 1503.7848919 |            |
| +0.1221383          | 429.69066686 | +0.1162382 | 858.37405725 | 8  | G   | 12    | 1390.7008279 |                     | 1390.7008279 |            |
|                     | 955.4268211  |            | 955.4268211  | 9  | P   | 11    | 1333.6793642 |                     | 667.34332032 | +0.0395532 |
|                     | 1115.4574693 | +0.0195815 | 1115.4574693 | 10 | C   | 10    | 1236.6266003 |                     | 1236.6266003 |            |
|                     | 1252.5163812 |            | 1252.5163812 | 11 | H   | 9     | 1076.5959521 |                     | 1076.5959521 |            |
| +0.4456503          | 683.78329254 |            | 1366.5593086 | 12 | N   | 8     | 939.53704025 |                     | 939.53704025 |            |
| +0.161736           | 740.32532453 |            | 1479.6433726 | 13 | I   | 7     | 825.4941128  |                     | 825.4941128  |            |
| +0.1392222          | 804.35461328 |            | 1607.7019501 | 14 | Q   | 6     | 712.41004882 |                     | 712.41004882 |            |
| +0.1445911          | 839.87317018 |            | 1678.7390639 | 15 | A   | 5     | 584.35147131 | -0.2090763          | 584.35147131 |            |
| +0.1507534          | 875.39172707 |            | 1749.7761777 | 16 | A   | 4     | 513.31435752 | +0.0123637          | 513.31435752 |            |
|                     | 1862.8602417 |            | 1862.8602417 | 17 | I   | 3     | 442.27724374 | -0.06417            | 442.27724374 |            |
|                     | 1919.8817054 |            | 1919.8817054 | 18 | G   | 2     | 329.19317976 | -0.0340001          | 329.19317976 |            |
|                     | 2016.9344692 |            | 2016.9344692 | 19 | P   | 1     | 272.17171603 | -0.2419065          | 272.17171603 |            |
|                     |              |            |              | 20 | R   | 0     | 175.11895218 | +0.057119           | 175.11895218 |            |

general information

|                       |             |
|-----------------------|-------------|
| Annotation:           | 14 of 20    |
| AminoAcids Coverage:  | 70%         |
| Intensity Coverage:   | 63%         |
| Peak Coverage:        | 27%         |
| Protein Localisation: | 233 ... 252 |



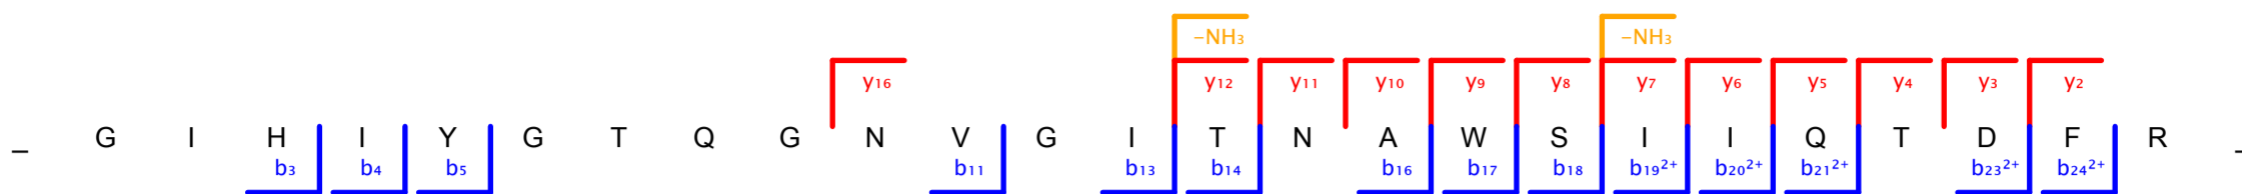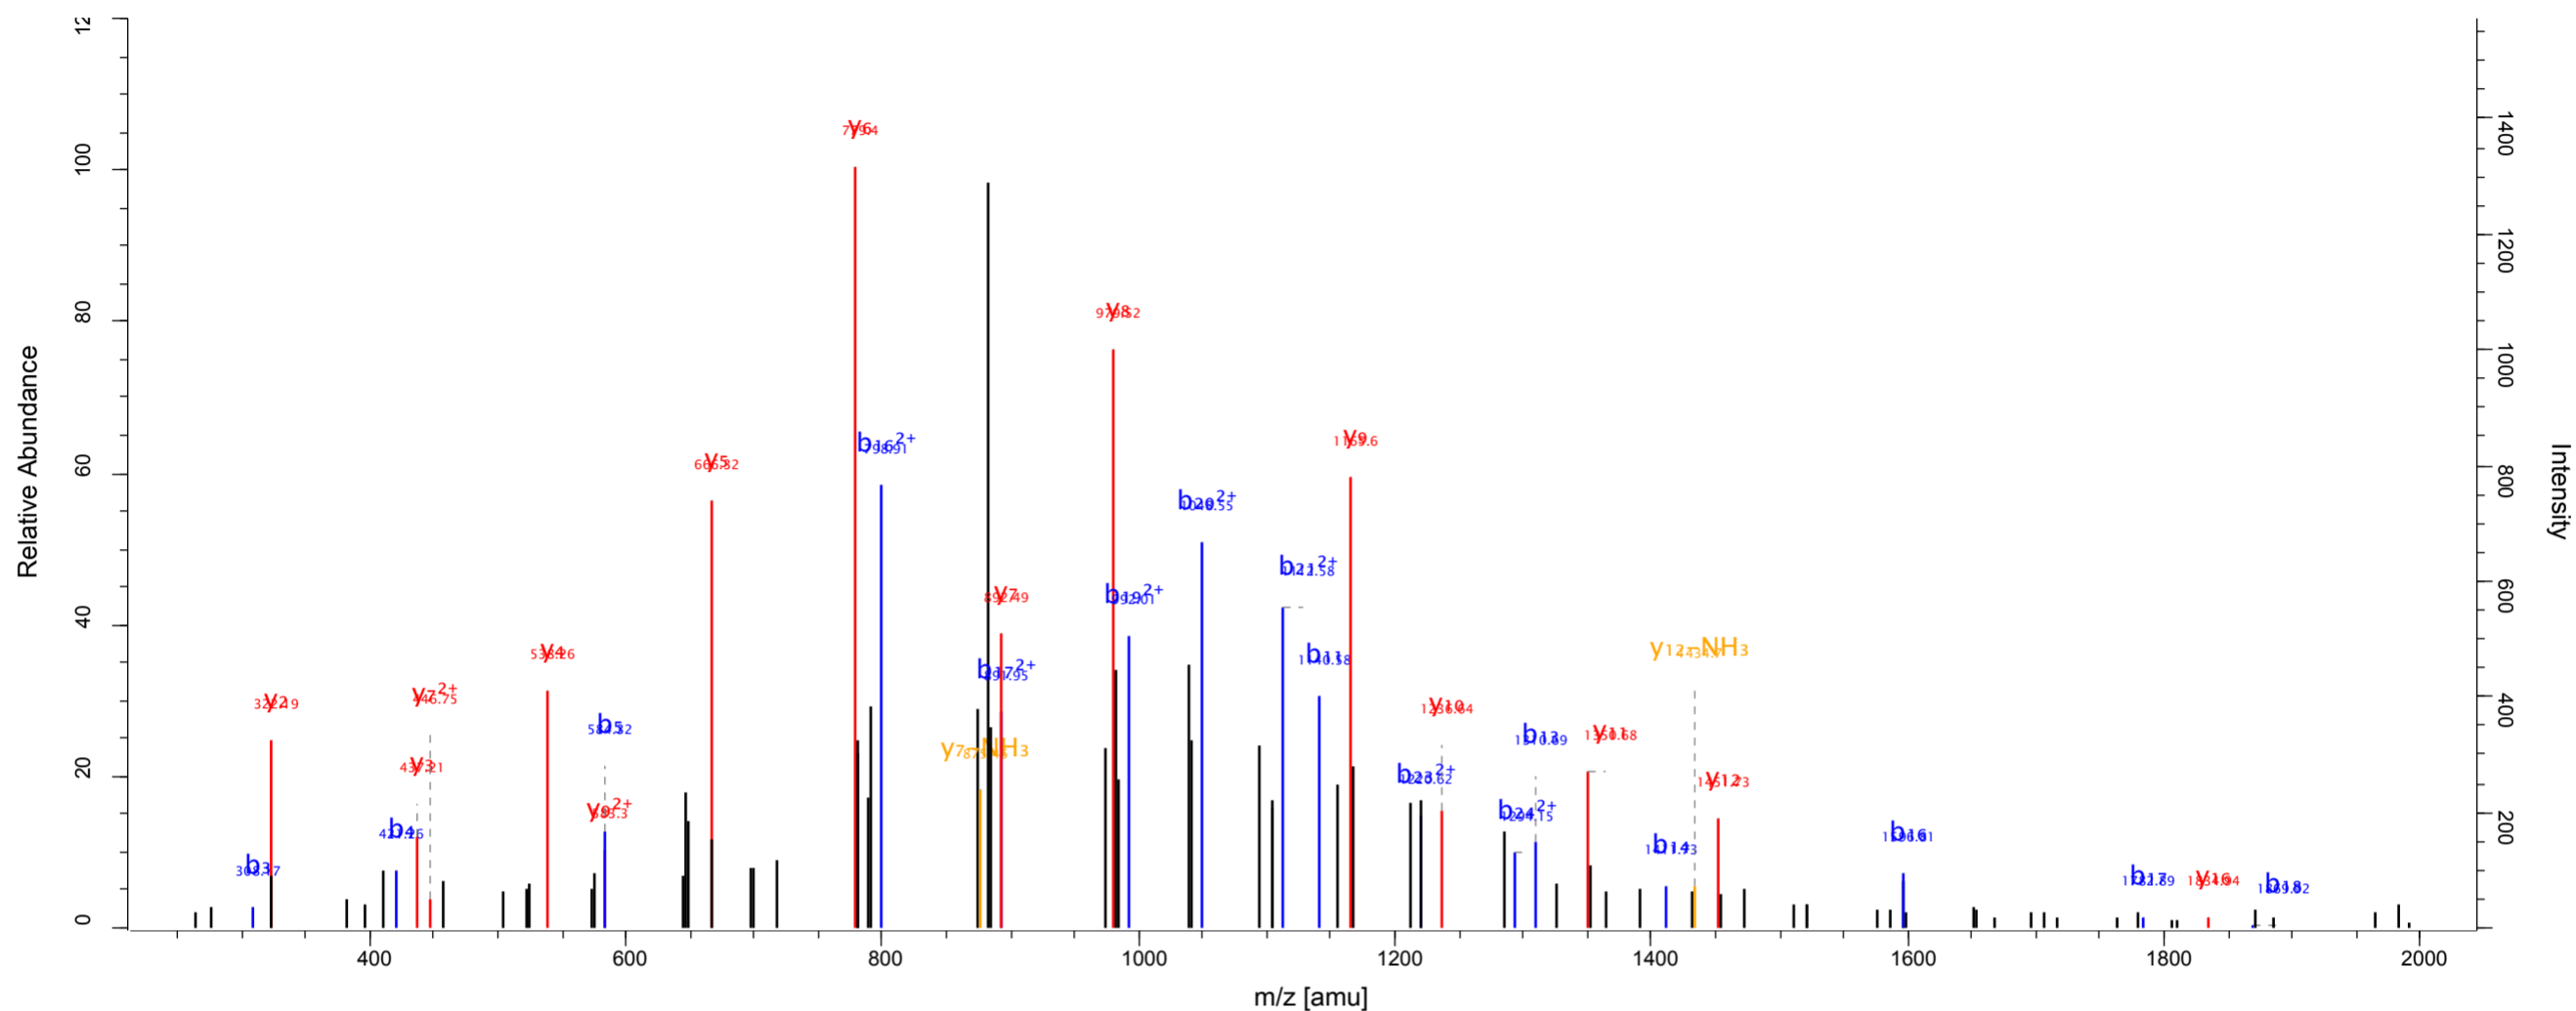

precursor information

|                   |                  |
|-------------------|------------------|
| Mass:             | 2760.20707       |
| m/z:              | 921.12062        |
| Charge:           | 2                |
| Potentialtime:    | 112.720761252520 |
| Score:            | 162.8184         |
| Mass Error (ppm): | 0.46850          |
| PEP:              | 5.4548550        |
| Precursor Type:   | MULTI            |

| b <sup>2+</sup> ion |              | b ion      |              |    |     |    | y ion        |            | y <sup>2+</sup> ion |            |
|---------------------|--------------|------------|--------------|----|-----|----|--------------|------------|---------------------|------------|
| Δ dalton            | mass         | Δ dalton   | mass         |    | seq |    | Δ dalton     | mass       | Δ dalton            | mass       |
|                     | 58.02874019  |            | 58.02874019  | 1  | G   | 24 |              |            |                     |            |
|                     | 171.11280417 |            | 171.11280417 | 2  | I   | 23 | 2704.384175  |            | 2704.384175         |            |
|                     | 308.17171603 | +0.0659549 | 308.17171603 | 3  | H   | 22 | 2591.300111  |            | 2591.300111         |            |
|                     | 421.25578001 | -0.0629089 | 421.25578001 | 4  | I   | 21 | 2454.2411992 |            | 2454.2411992        |            |
|                     | 584.31910855 | -0.1753708 | 584.31910855 | 5  | Y   | 20 | 2341.1571352 |            | 2341.1571352        |            |
|                     | 641.34057228 |            | 641.34057228 | 6  | G   | 19 | 2178.0938066 |            | 2178.0938066        |            |
|                     | 742.38825075 |            | 742.38825075 | 7  | T   | 18 | 2121.0723429 |            | 2121.0723429        |            |
|                     | 870.44682826 |            | 870.44682826 | 8  | Q   | 17 | 2020.0246645 |            | 2020.0246645        |            |
|                     | 927.46829198 |            | 927.46829198 | 9  | G   | 16 | 1891.9660869 |            | 1891.9660869        |            |
|                     | 1041.5112194 |            | 1041.5112194 | 10 | N   | 15 | 1834.9446232 | +0.4389217 | 1834.9446232        |            |
|                     | 1140.5796333 | +0.1034721 | 1140.5796333 | 11 | V   | 14 | 1720.9016958 |            | 1720.9016958        |            |
|                     | 1197.6010971 |            | 1197.6010971 | 12 | G   | 13 | 1621.8332819 |            | 1621.8332819        |            |
|                     | 1310.6851611 | -0.0975146 | 1310.6851611 | 13 | I   | 12 | 1564.8118181 |            | 1564.8118181        |            |
|                     | 1411.7328395 | +0.120554  | 1411.7328395 | 14 | T   | 11 | 1451.7277541 | -0.0750442 | 1451.7277541        |            |
|                     | 1525.775767  |            | 1525.775767  | 15 | N   | 10 | 1350.6800757 | -0.0090552 | 1350.6800757        |            |
| +0.0929121          | 798.91007861 | +0.3215187 | 1596.8128808 | 16 | A   | 9  | 1236.6371482 | -0.0978416 | 1236.6371482        |            |
| -0.0105871          | 891.94973509 | +0.3823424 | 1782.8921937 | 17 | W   | 8  | 1165.6000344 | -0.1174905 | 583.30365545        | +0.2112982 |
|                     | 1869.9242221 | -0.4521762 | 1869.9242221 | 18 | S   | 7  | 979.52072149 | -0.1010438 | 979.52072149        |            |
| -0.087066           | 992.00778129 |            | 1983.0082861 | 19 | I   | 6  | 892.48869308 | +0.1170809 | 446.74798477        | -0.460204  |
| +0.1318273          | 1048.5498133 |            | 2096.0923501 | 20 | I   | 5  | 779.4046291  | -0.0382351 | 779.4046291         |            |
| -0.1092534          | 1112.579102  |            | 2224.1509276 | 21 | Q   | 4  | 666.32056511 | +0.0260535 | 666.32056511        |            |
|                     | 2325.1986061 |            | 2325.1986061 | 22 | T   | 3  | 538.2619876  | +0.0591794 | 538.2619876         |            |
| -0.3250309          | 1220.6164128 |            | 2440.2255491 | 23 | D   | 2  | 437.21430913 | -0.0381006 | 437.21430913        |            |
| -0.1004488          | 1294.1506197 |            | 2587.293963  | 24 | F   | 1  | 322.1873661  | +0.0544552 | 322.1873661         |            |
|                     |              |            |              | 25 | R   | 0  | 175.11895218 |            | 175.11895218        |            |

general information

|                       |             |
|-----------------------|-------------|
| Annotation:           | 17 of 25    |
| AminoAcids Coverage:  | 68 %        |
| Intensity Coverage:   | 52 %        |
| Peak Coverage:        | 22 %        |
| Protein Localisation: | 122 ... 146 |

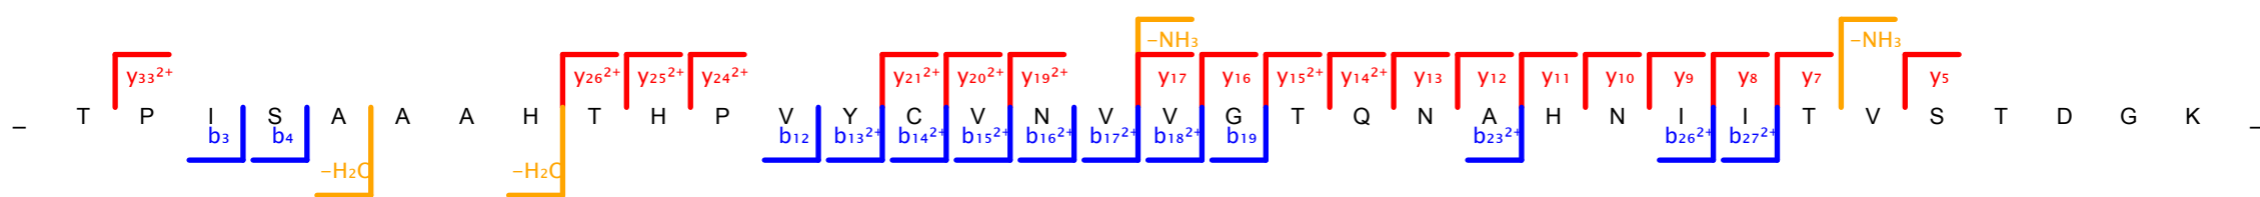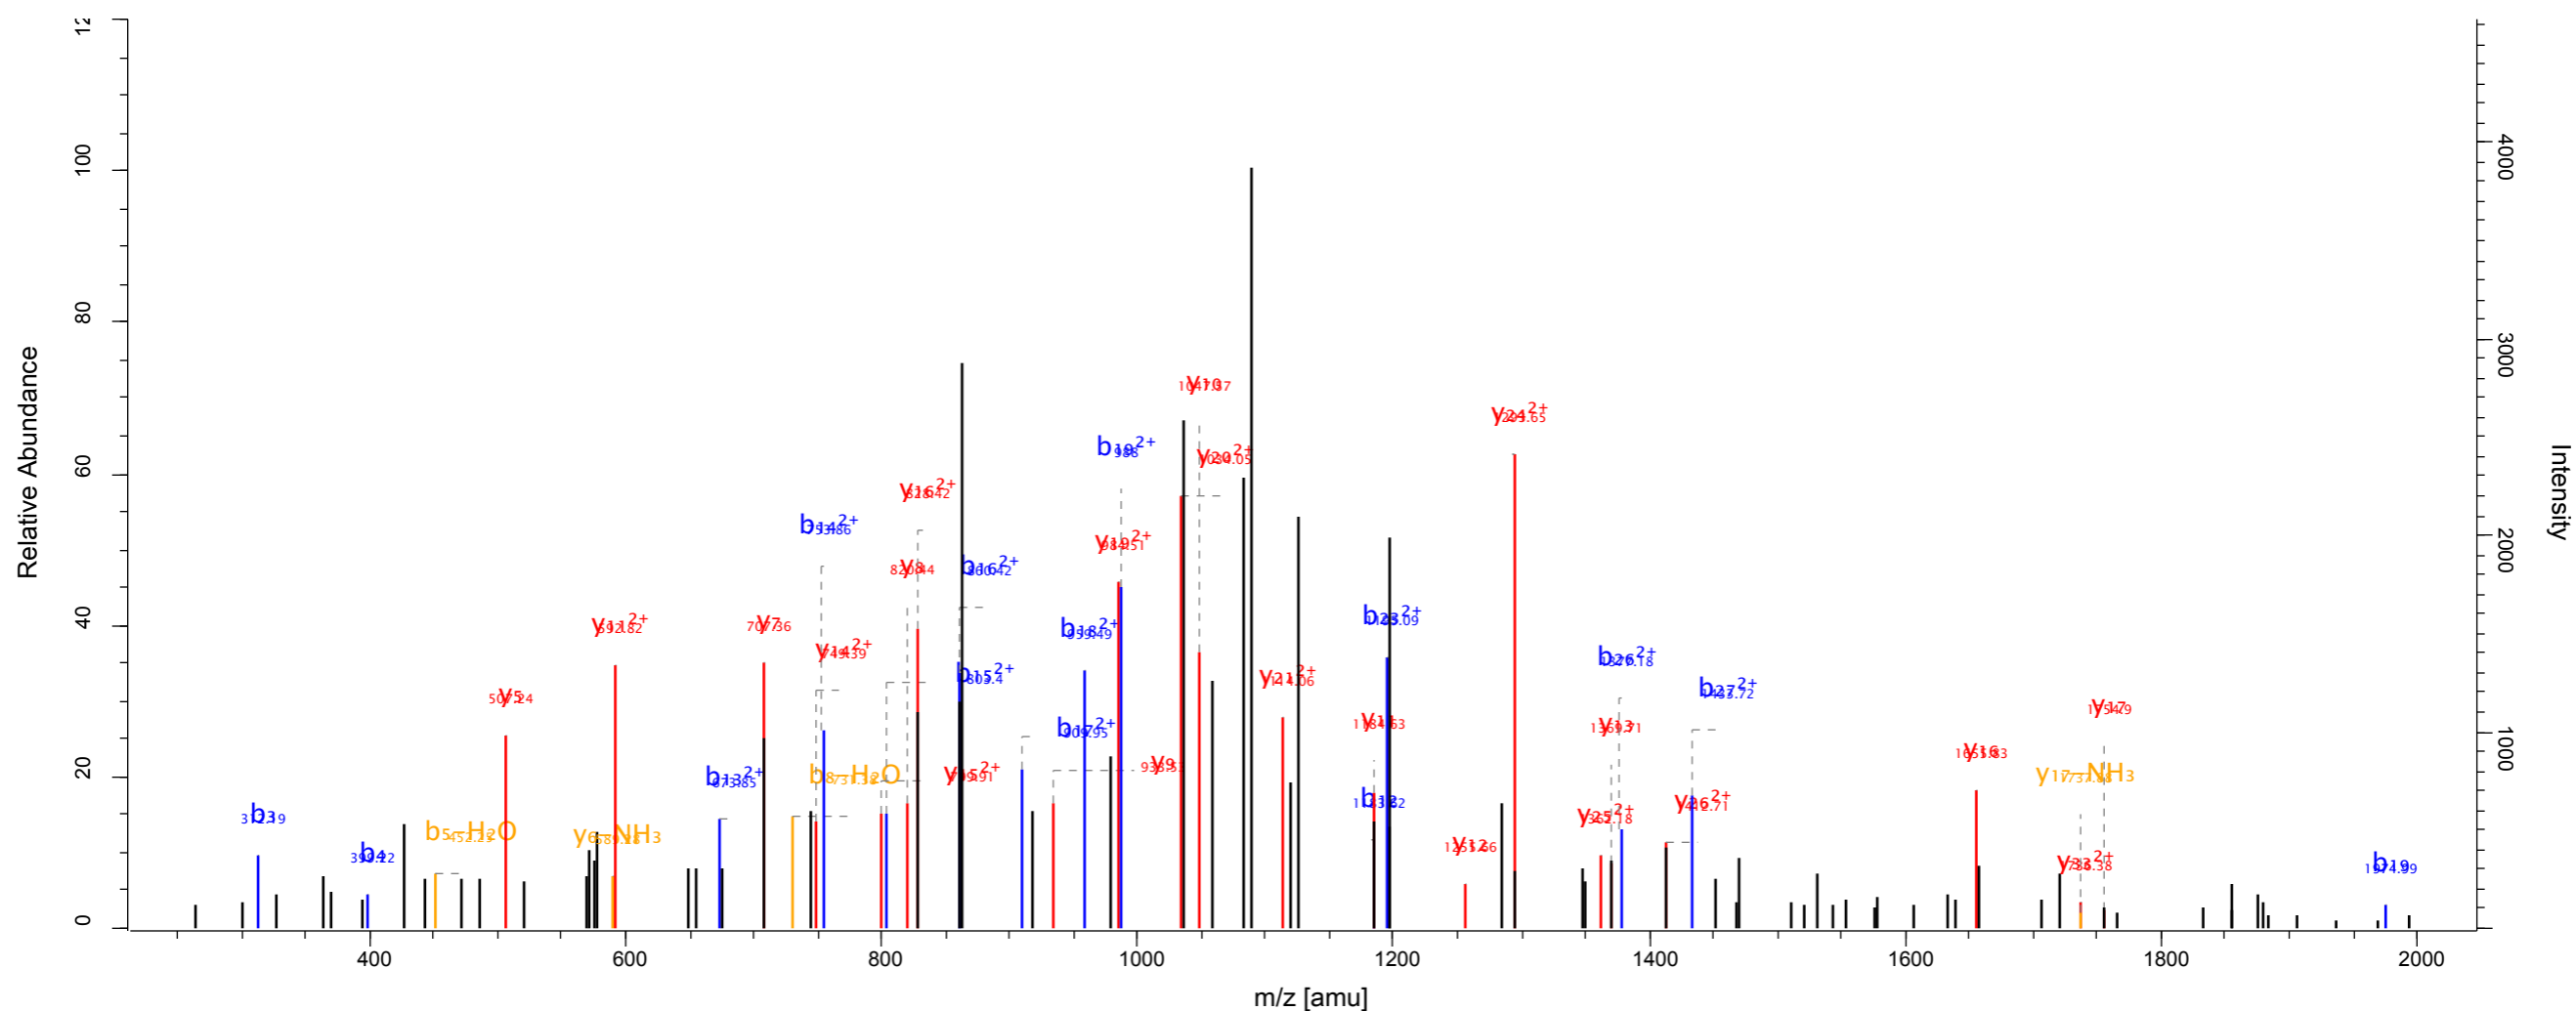

precursor information

|                   |                  |
|-------------------|------------------|
| Mass:             | 2571.78227       |
| m/z:              | 802.05212        |
| Charge:           | 4+               |
| Retention time:   | 71.8272606890414 |
| Score:            | 140.0706         |
| Mass Error (ppm): | -0.22202         |
| DEP:              | 0.2225E-58       |
| Precursor Type:   | MULTI            |

| b <sup>2+</sup> ion |              | b ion      |              |    |     |    | y ion        |            | y <sup>2+</sup> ion |            |
|---------------------|--------------|------------|--------------|----|-----|----|--------------|------------|---------------------|------------|
| Δ dalton            | mass         | Δ dalton   | mass         |    | seq |    | Δ dalton     | mass       | Δ dalton            | mass       |
|                     | 102.05495494 |            | 102.05495494 | 1  | T   | 33 |              |            |                     |            |
|                     | 199.10771879 |            | 199.10771879 | 2  | P   | 32 | 3471.7437619 |            | 1736.3755192        | +0.4255062 |
|                     | 312.19178277 | -0.0243328 | 312.19178277 | 3  | I   | 31 | 3374.6909981 |            | 3374.6909981        |            |
|                     | 399.22381118 | +0.0565843 | 399.22381118 | 4  | S   | 30 | 3261.6069341 |            | 3261.6069341        |            |
|                     | 470.26092497 |            | 470.26092497 | 5  | A   | 29 | 3174.5749057 |            | 3174.5749057        |            |
|                     | 541.29803876 |            | 541.29803876 | 6  | A   | 28 | 3103.5377919 |            | 3103.5377919        |            |
|                     | 612.33515255 |            | 612.33515255 | 7  | A   | 27 | 3032.5006781 |            | 3032.5006781        |            |
|                     | 749.39406441 |            | 749.39406441 | 8  | H   | 26 | 2961.4635643 |            | 2961.4635643        |            |
|                     | 850.44174288 |            | 850.44174288 | 9  | T   | 25 | 2824.4046525 |            | 1412.7059645        | -0.1636061 |
|                     | 987.50065475 |            | 987.50065475 | 10 | H   | 24 | 2723.356974  |            | 1362.1821252        | +0.4681433 |
|                     | 1084.5534186 |            | 1084.5534186 | 11 | P   | 23 | 2586.2980621 |            | 1293.6526693        | +0.3452555 |
|                     | 1183.6218325 | +0.4352964 | 1183.6218325 | 12 | V   | 22 | 2489.2452983 |            | 2489.2452983        |            |
| +0.1699556          | 673.84621876 |            | 1346.6851611 | 13 | Y   | 21 | 2390.1768844 |            | 2390.1768844        |            |
| +0.2962941          | 753.86154286 |            | 1506.7158093 | 14 | C   | 20 | 2227.1135558 |            | 1114.0604161        | -0.0035314 |
| -0.0949075          | 803.39574982 |            | 1605.7842232 | 15 | V   | 19 | 2067.0829076 |            | 1034.045092         | +0.2068611 |
| -0.2232438          | 860.41721354 |            | 1719.8271506 | 16 | N   | 18 | 1968.0144937 |            | 984.51088508        | +0.2589513 |
| -0.0186202          | 909.9514205  |            | 1818.8955645 | 17 | V   | 17 | 1853.9715662 |            | 1853.9715662        |            |
| +0.1498706          | 959.48562746 |            | 1917.9639784 | 18 | V   | 16 | 1754.9031523 | -0.1378935 | 1754.9031523        |            |
| -0.0913911          | 987.99635932 | -0.4007254 | 1974.9854422 | 19 | G   | 15 | 1655.8347384 | -0.2915255 | 828.42100744        | -0.0887321 |
|                     | 2076.0331206 |            | 2076.0331206 | 20 | T   | 14 | 1598.8132747 |            | 799.91027558        | +0.0250272 |
|                     | 2204.0916982 |            | 2204.0916982 | 21 | Q   | 13 | 1497.7655962 |            | 749.38643634        | -0.2115706 |
|                     | 2318.1346256 |            | 2318.1346256 | 22 | N   | 12 | 1369.7070187 | -0.4869259 | 1369.7070187        |            |
| +0.2196962          | 1195.0895079 |            | 2389.1717394 | 23 | A   | 11 | 1255.6640913 | +0.2050494 | 1255.6640913        |            |
|                     | 2526.2306513 |            | 2526.2306513 | 24 | H   | 10 | 1184.6269775 | +0.1298585 | 592.81712697        | -0.2229497 |
|                     | 2640.2735787 |            | 2640.2735787 | 25 | N   | 9  | 1047.5680656 | -0.1195793 | 1047.5680656        |            |
| +0.3695424          | 1377.1824596 |            | 2753.3576427 | 26 | I   | 8  | 933.52513816 | -0.059562  | 933.52513816        |            |
| +0.1293903          | 1433.7244916 |            | 2866.4417067 | 27 | I   | 7  | 820.44107418 | +0.2990992 | 820.44107418        |            |
|                     | 2967.4893851 |            | 2967.4893851 | 28 | T   | 6  | 707.3570102  | +0.0055997 | 707.3570102         |            |
|                     | 3066.5577991 |            | 3066.5577991 | 29 | V   | 5  | 606.30933173 |            | 606.30933173        |            |
|                     | 3153.5898275 |            | 3153.5898275 | 30 | S   | 4  | 507.24091781 | +0.0819582 | 507.24091781        |            |
|                     | 3254.6375059 |            | 3254.6375059 | 31 | T   | 3  | 420.2088894  |            | 420.2088894         |            |
|                     | 3369.664449  |            | 3369.664449  | 32 | D   | 2  | 319.16121093 |            | 319.16121093        |            |
|                     | 3426.6859127 |            | 3426.6859127 | 33 | G   | 1  | 204.13426789 |            | 204.13426789        |            |
|                     |              |            |              | 34 | K   | 0  | 147.11280417 |            | 147.11280417        |            |

general information

|                       |             |
|-----------------------|-------------|
| Annotation:           | 27 of 34    |
| AminoAcids Coverage:  | 70%         |
| Intensity Coverage:   | 47%         |
| Peak Coverage:        | 36%         |
| Protein Localisation: | 381 ... 414 |

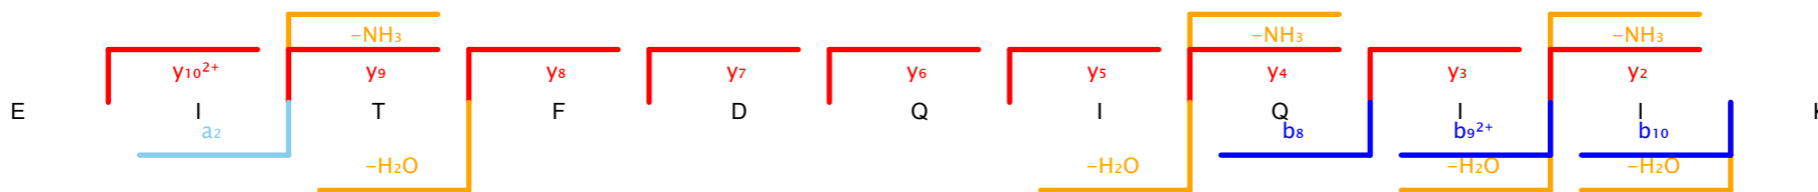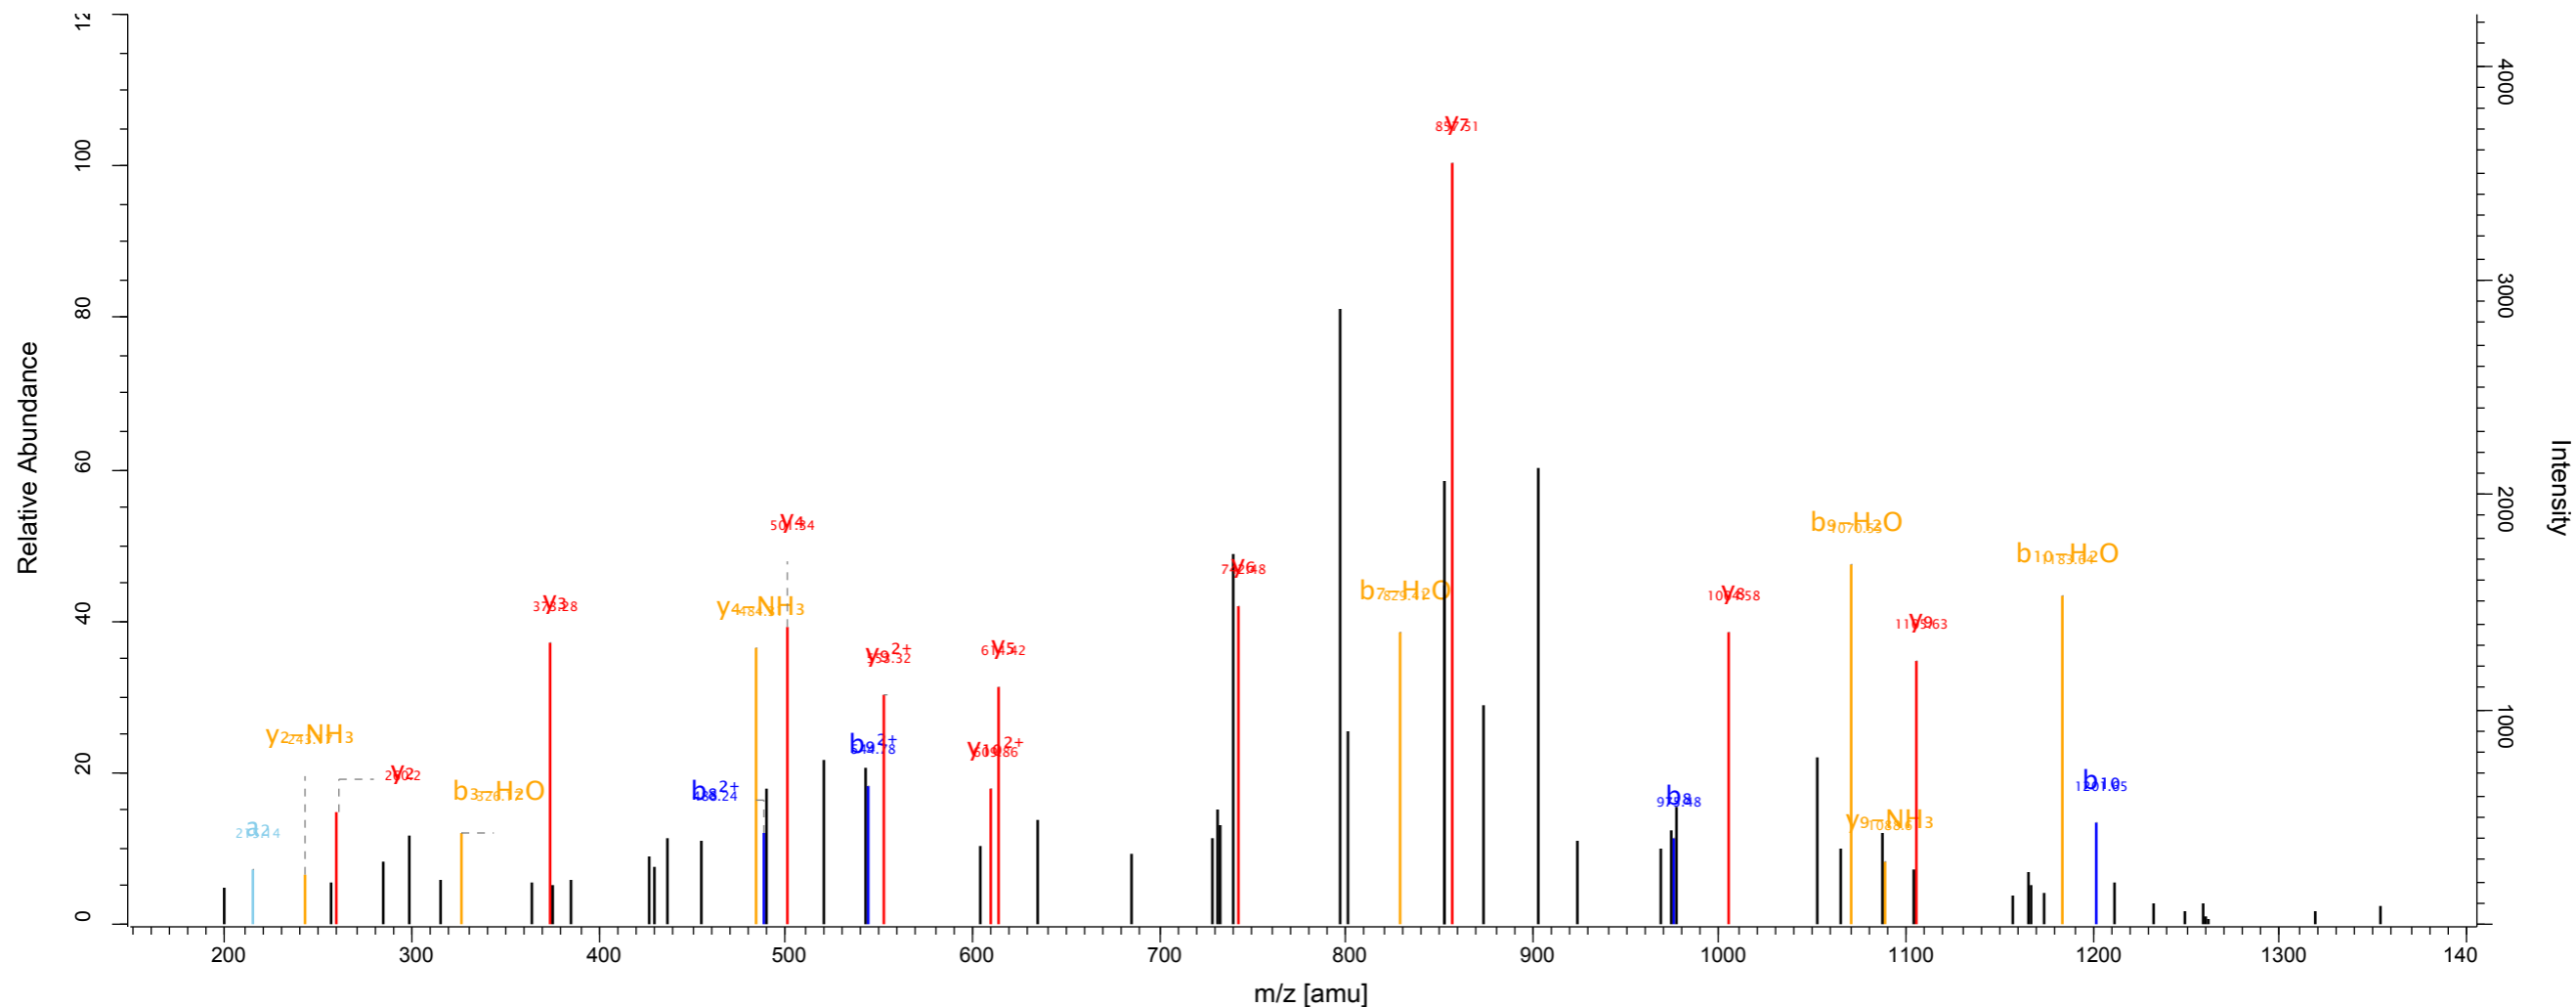

precursor information

|                   |                  |
|-------------------|------------------|
| Mass:             | 1246.74240       |
| m/z:              | 674.37002        |
| Charge:           | 2+               |
| Retention time:   | 04.5200570467773 |
| Score:            | 141.0222         |
| Mass Error (ppm): | -0.70814         |
| PEP:              | 0.00020576       |
| Precursor Type:   | ISO              |

general information

|                       |             |
|-----------------------|-------------|
| Annotation:           | 0 of 11     |
| AminoAcids Coverage:  | 82 %        |
| Intensity Coverage:   | 17 %        |
| Peak Coverage:        | 31 %        |
| Protein Localisation: | 399 ... 409 |

| a ion      |            | b <sup>2+</sup> ion |            | b ion      |            |    |     |    | y ion      |            | y <sup>2+</sup> ion |            |
|------------|------------|---------------------|------------|------------|------------|----|-----|----|------------|------------|---------------------|------------|
| Δ dalton   | mass       | Δ dalton            | mass       | Δ dalton   | mass       |    | seq |    | Δ dalton   | mass       | Δ dalton            | mass       |
|            | 102.054955 |                     | 130.04987  |            | 130.04987  | 1  | E   | 10 |            |            |                     |            |
| -0.0031852 | 215.139019 |                     | 243.133934 |            | 243.133934 | 2  | I   | 9  | 1218.70925 |            | 609.858264          | +0.0614753 |
|            | 316.186697 |                     | 344.181612 |            | 344.181612 | 3  | T   | 8  | 1105.62519 | -0.1268955 | 553.316232          | -0.0509117 |
|            | 463.255111 |                     | 491.250026 |            | 491.250026 | 4  | F   | 7  | 1004.57751 | -0.171075  | 1004.57751          |            |
|            | 578.282054 |                     | 606.276969 |            | 606.276969 | 5  | D   | 6  | 857.509094 | -0.1757812 | 857.509094          |            |
|            | 706.340632 |                     | 734.335546 |            | 734.335546 | 6  | Q   | 5  | 742.482151 | -0.0485574 | 742.482151          |            |
|            | 819.424696 |                     | 847.41961  |            | 847.41961  | 7  | I   | 4  | 614.423574 | -0.4882099 | 614.423574          |            |
|            | 947.483273 | -0.3128616          | 488.242732 | -0.1828388 | 975.478188 | 8  | Q   | 3  | 501.33951  | -0.0002152 | 501.33951           |            |
|            | 1060.56734 | -0.4183091          | 544.784764 |            | 1088.56225 | 9  | I   | 2  | 373.280932 | +0.0598882 | 373.280932          |            |
|            | 1173.6514  |                     | 1201.64632 | -0.1807398 | 1201.64632 | 10 | I   | 1  | 260.196868 | -0.1438896 | 260.196868          |            |
|            |            |                     |            |            |            | 11 | K   | 0  | 147.112804 |            | 147.112804          |            |

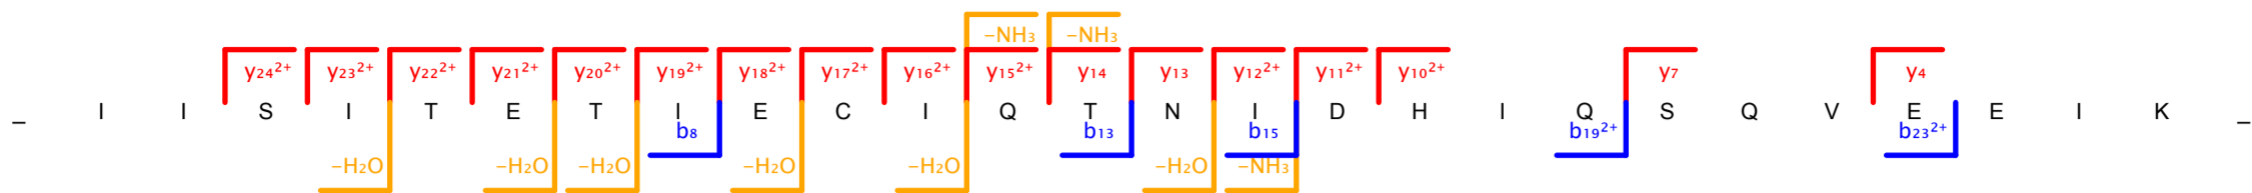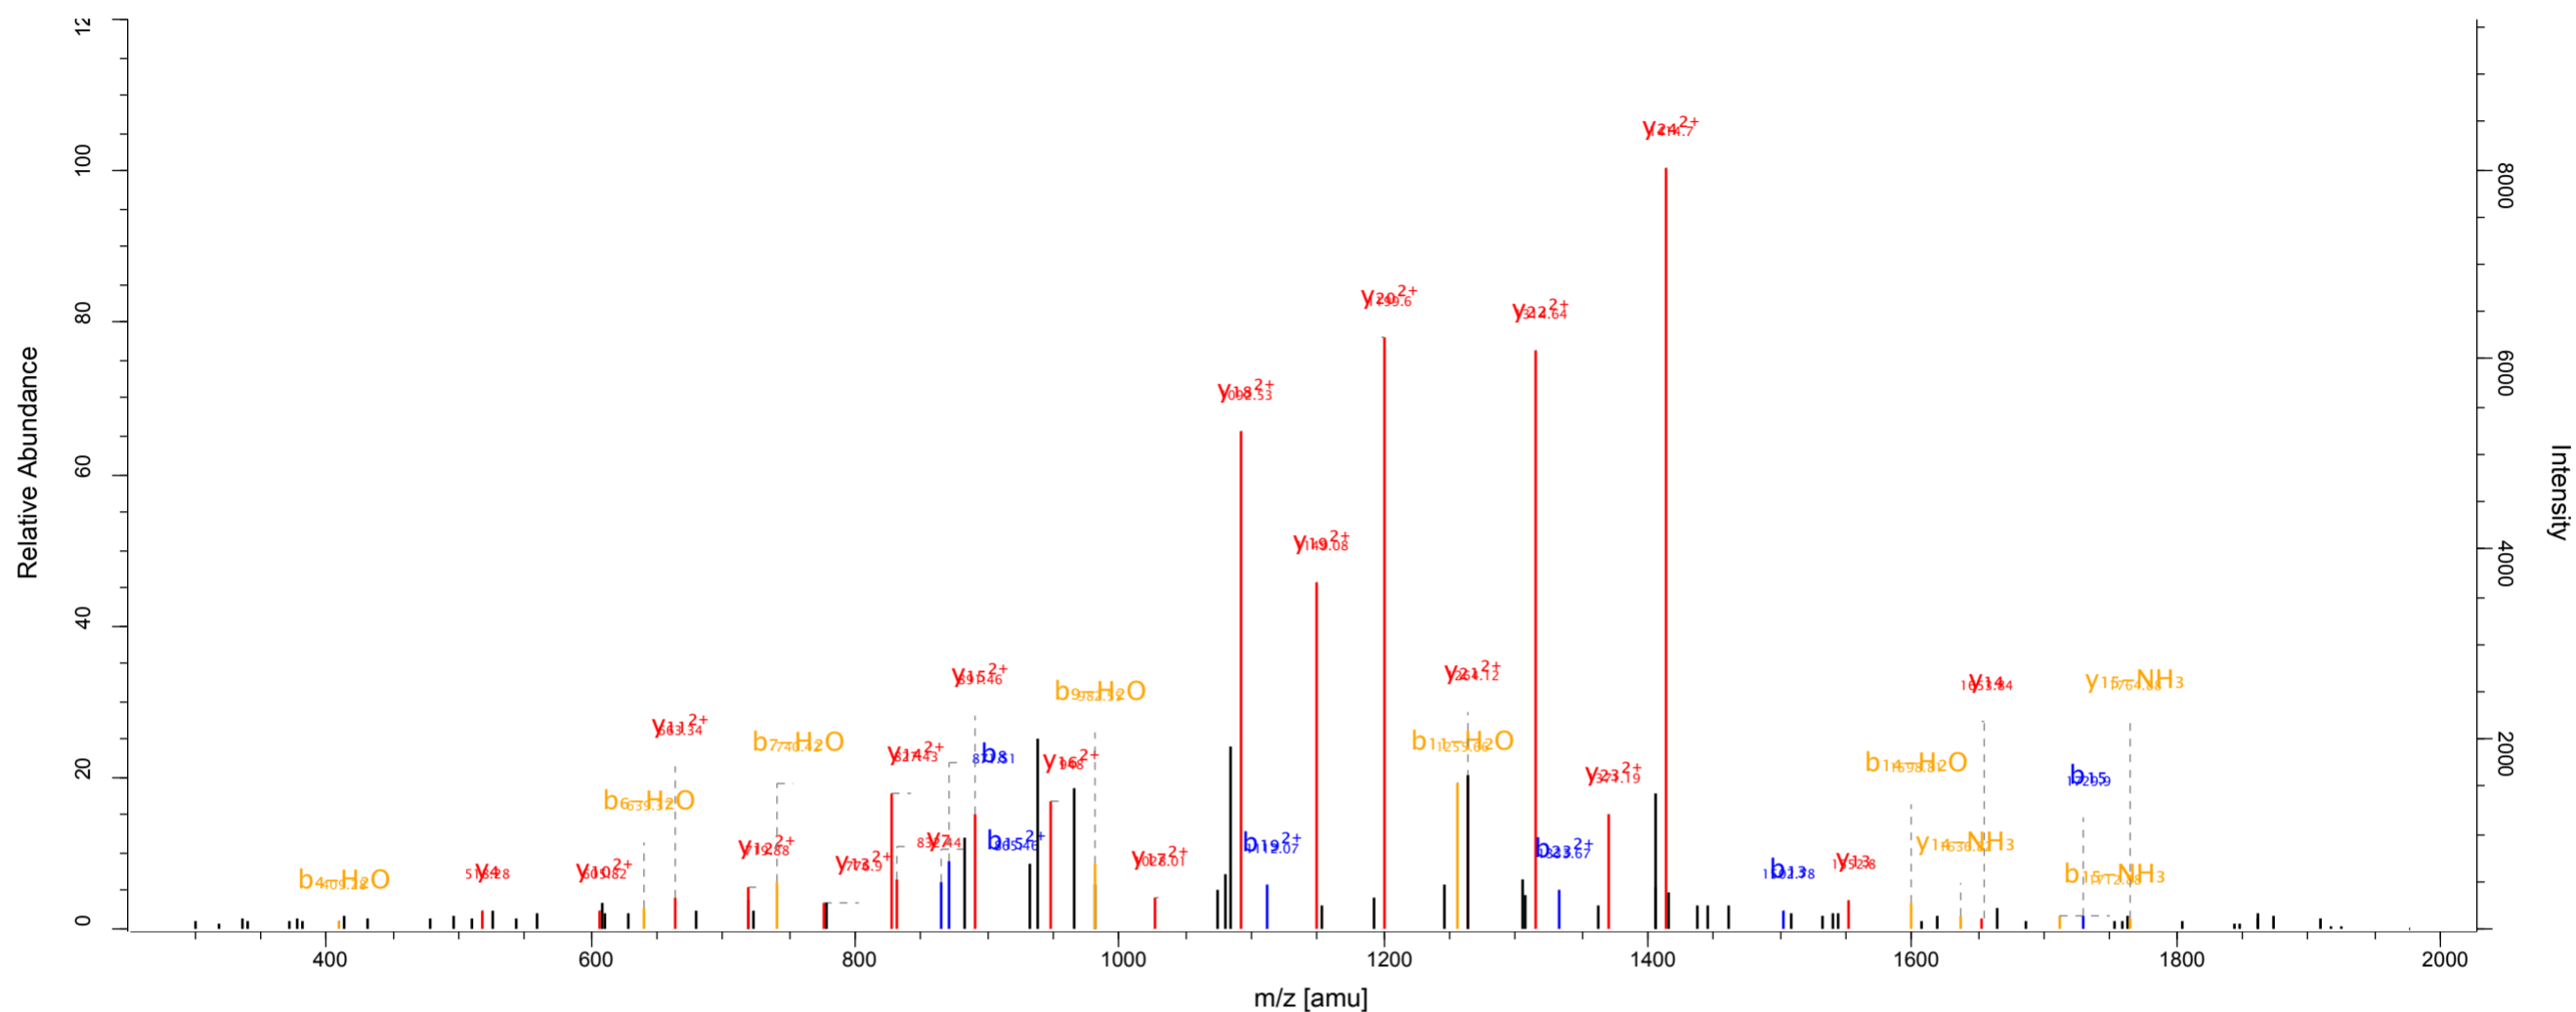

precursor information

|                   |                  |
|-------------------|------------------|
| Mass:             | 2052.56107       |
| m/z:              | 1018.96007       |
| Charge:           | 2+               |
| Retention time:   | 121.263108852520 |
| Score:            | 120.4618         |
| Mass Error (ppm): | 0.65244          |
| PEP:              | 1.2016E-20       |
| Precursor Type:   | MULTI            |

| b <sup>2+</sup> ion |              | b ion      |              |    |     |    | y ion        |            | y <sup>2+</sup> ion |            |
|---------------------|--------------|------------|--------------|----|-----|----|--------------|------------|---------------------|------------|
| Δ dalton            | mass         | Δ dalton   | mass         |    | seq |    | Δ dalton     | mass       | Δ dalton            | mass       |
|                     | 114.09134045 |            | 114.09134045 | 1  | I   | 25 |              |            |                     |            |
|                     | 227.17540443 |            | 227.17540443 | 2  | I   | 24 | 2941.4822937 |            | 2941.4822937        |            |
|                     | 314.20743284 |            | 314.20743284 | 3  | S   | 23 | 2828.3982297 |            | 1414.7027531        | +0.1257381 |
|                     | 427.29149682 |            | 427.29149682 | 4  | I   | 22 | 2741.3662013 |            | 1371.1867389        | +0.2107221 |
|                     | 528.33917529 |            | 528.33917529 | 5  | T   | 21 | 2628.2821373 |            | 1314.6447069        | +0.1593703 |
|                     | 657.38176839 |            | 657.38176839 | 6  | E   | 20 | 2527.2344588 |            | 1264.1208676        | -0.1216001 |
|                     | 758.42944686 |            | 758.42944686 | 7  | T   | 19 | 2398.1918657 |            | 1199.5995711        | +0.2002336 |
|                     | 871.51351084 | -0.369712  | 871.51351084 | 8  | I   | 18 | 2297.1441872 |            | 1149.0757319        | +0.1344732 |
|                     | 1000.5561039 |            | 1000.5561039 | 9  | E   | 17 | 2184.0601233 |            | 1092.5336999        | +0.1225501 |
|                     | 1160.5867521 |            | 1160.5867521 | 10 | C   | 16 | 2055.0175302 |            | 1028.0124033        | -0.1278818 |
|                     | 1273.6708161 |            | 1273.6708161 | 11 | I   | 15 | 1894.986882  |            | 947.99707921        | +0.1186434 |
|                     | 1401.7293936 |            | 1401.7293936 | 12 | Q   | 14 | 1781.902818  |            | 891.45504722        | +0.2565006 |
|                     | 1502.7770721 | -0.2447235 | 1502.7770721 | 13 | T   | 13 | 1653.8442405 | -0.2620871 | 827.42575847        | +0.1180648 |
|                     | 1616.8199996 |            | 1616.8199996 | 14 | N   | 12 | 1552.796562  | -0.1686323 | 776.90191923        | -0.1477688 |
| -0.0247618          | 865.45567    | -0.0063585 | 1729.9040635 | 15 | I   | 11 | 1438.7536345 |            | 719.88045551        | -0.1858144 |
|                     | 1844.9310066 |            | 1844.9310066 | 16 | D   | 10 | 1325.6695706 |            | 663.33842352        | +0.0813763 |
|                     | 1981.9899184 |            | 1981.9899184 | 17 | H   | 9  | 1210.6426275 |            | 605.824952          | -0.0345467 |
|                     | 2095.0739824 |            | 2095.0739824 | 18 | I   | 8  | 1073.5837157 |            | 1073.5837157        |            |
| +0.2679724          | 1112.0699182 |            | 2223.1325599 | 19 | Q   | 7  | 960.49965169 |            | 960.49965169        |            |
|                     | 2310.1645883 |            | 2310.1645883 | 20 | S   | 6  | 832.44107418 | +0.0330469 | 832.44107418        |            |
|                     | 2438.2231658 |            | 2438.2231658 | 21 | Q   | 5  | 745.40904577 |            | 745.40904577        |            |
|                     | 2537.2915798 |            | 2537.2915798 | 22 | V   | 4  | 617.35046826 |            | 617.35046826        |            |
| -0.4396456          | 1333.6707247 |            | 2666.3341729 | 23 | E   | 3  | 518.28205434 | +0.025807  | 518.28205434        |            |
|                     | 2795.3767659 |            | 2795.3767659 | 24 | E   | 2  | 389.23946125 |            | 389.23946125        |            |
|                     | 2908.4608299 |            | 2908.4608299 | 25 | I   | 1  | 260.19686815 |            | 260.19686815        |            |
|                     |              |            |              | 26 | K   | 0  | 147.11280417 |            | 147.11280417        |            |

general information

|                       |             |
|-----------------------|-------------|
| Annotation:           | 18 of 26    |
| AminoAcids Coverage:  | 60 %        |
| Intensity Coverage:   | 68 %        |
| Peak Coverage:        | 25 %        |
| Protein Localisation: | 112 ... 137 |

Scan number 1625 Raw file 20091031\_Orbi6\_MaHe\_SA\_ADH\_exp3\_Laminin\_Re\_Gel01  
 Method ITMS; CID Genenames EIF4EBP2

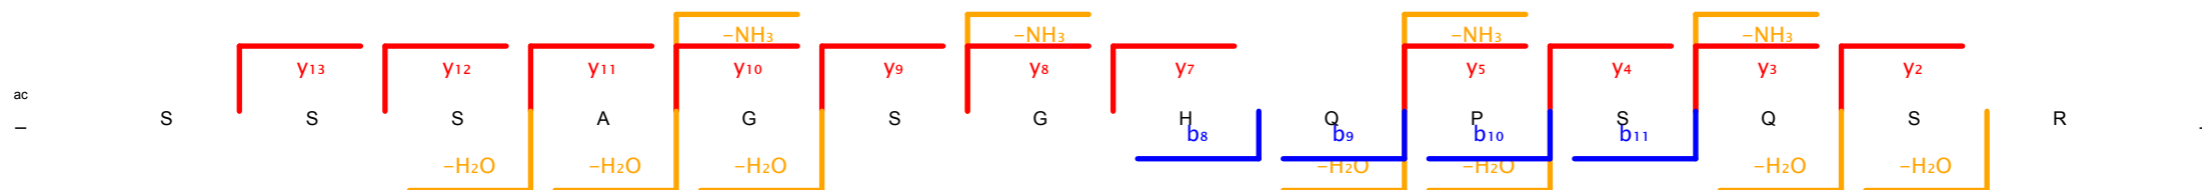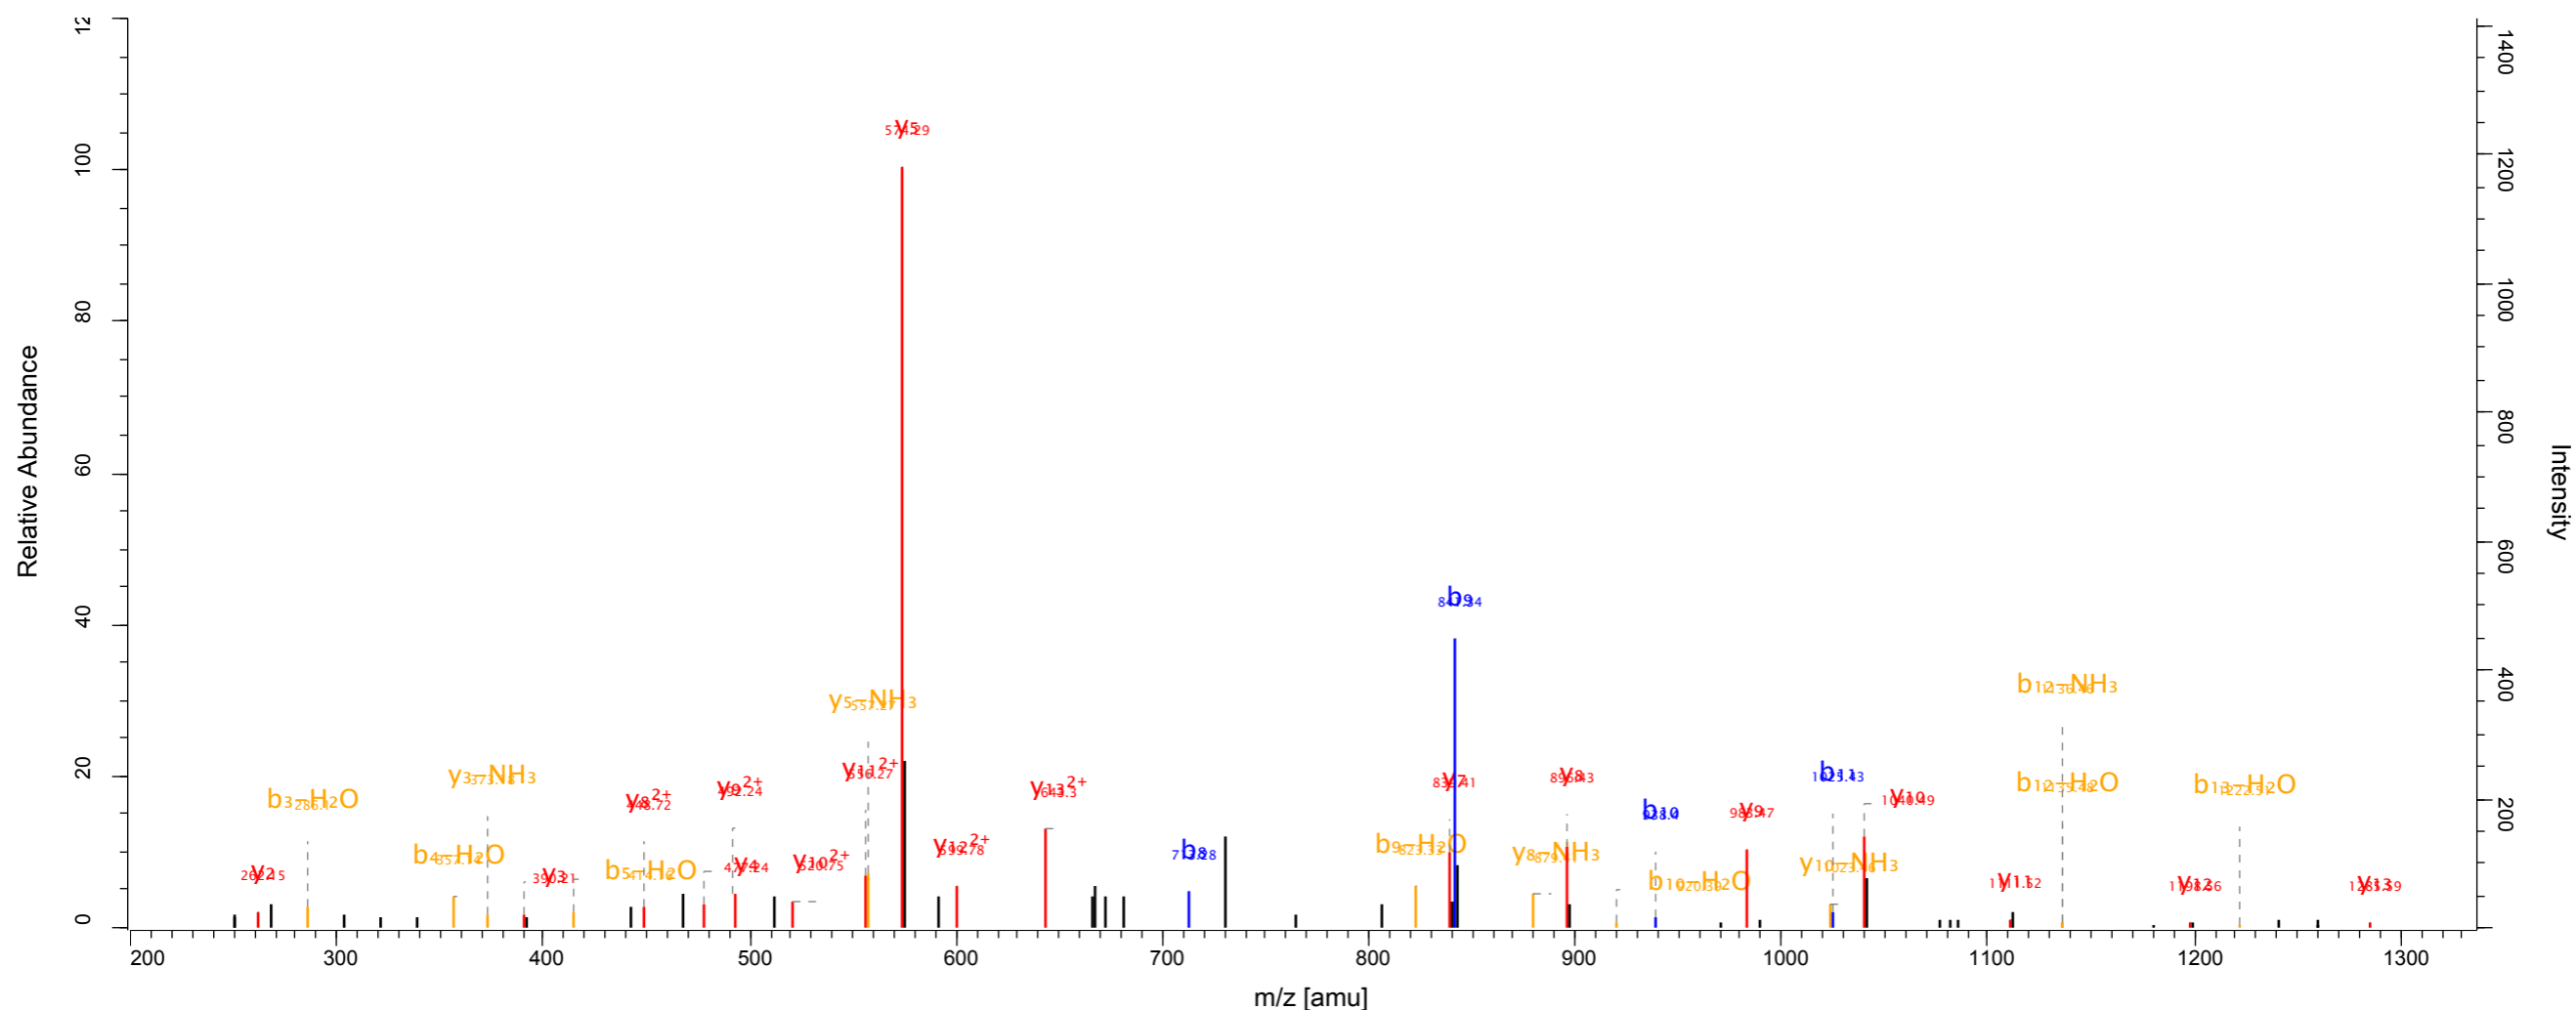

precursor information

|                   |                  |
|-------------------|------------------|
| Mass:             | 1412.62211       |
| m/z:              | 707.81882        |
| Charge:           | 2+               |
| Potentia time:    | 24.6811004007227 |
| Score:            | 188.0072         |
| Mass Error [ppm]: | 0.12146          |
| DFD:              | 1.25855.12       |
| Precursor Type:   | MULTI            |

general information

|                       |          |
|-----------------------|----------|
| Annotation:           | 12 of 14 |
| AminoAcids Coverage:  | 86%      |
| Intensity Coverage:   | 70%      |
| Peak Coverage:        | 40%      |
| Protein Localisation: | 2 ... 15 |

| b ion      |                |    |     |    | y ion          |            | y <sup>2+</sup> ion |            |
|------------|----------------|----|-----|----|----------------|------------|---------------------|------------|
| Δ dalton   | mass           |    | seq |    | Δ dalton       | mass       | Δ dalton            | mass       |
|            | 130.049869563  | 1  | S   | 13 |                |            |                     |            |
|            | 217.081897973  | 2  | S   | 12 | 1285.587966203 | +0.1025856 | 643.297621335       | +0.2474836 |
|            | 304.113926383  | 3  | S   | 11 | 1198.555937793 | -0.1002493 | 599.78160713        | +0.0360198 |
|            | 375.15104017   | 4  | A   | 10 | 1111.523909383 | -0.1264484 | 556.265592925       | -0.2081588 |
|            | 432.172503894  | 5  | G   | 9  | 1040.486795595 | +0.0053919 | 520.747036031       | -0.0844994 |
|            | 519.204532304  | 6  | S   | 8  | 983.465331872  | +0.0070192 | 492.236304169       | +0.3761836 |
|            | 576.225996028  | 7  | G   | 7  | 896.433303462  | +0.0812839 | 448.720289964       | -0.0279072 |
| -0.0259357 | 713.28490789   | 8  | H   | 6  | 839.411839738  | +0.0101573 | 839.411839738       |            |
| -0.0157876 | 841.343485401  | 9  | Q   | 5  | 702.352927876  |            | 702.352927876       |            |
| -0.0041594 | 938.396249253  | 10 | P   | 4  | 574.294350364  | +0.0004494 | 574.294350364       |            |
| +0.0123962 | 1025.428277663 | 11 | S   | 3  | 477.241586512  | +0.108206  | 477.241586512       |            |
|            | 1153.486855175 | 12 | Q   | 2  | 390.209558102  | +0.1650147 | 390.209558102       |            |
|            | 1240.518883584 | 13 | S   | 1  | 262.150980591  | -0.1322428 | 262.150980591       |            |
|            |                | 14 | R   | 0  | 175.118952181  |            | 175.118952181       |            |

Scan number 5075 Raw file 20091031\_Orbi6\_MaHe\_SA\_ADH\_exp3\_Laminin\_Re\_Gel06  
 Method ITMS; CID Genenames RWDD2B

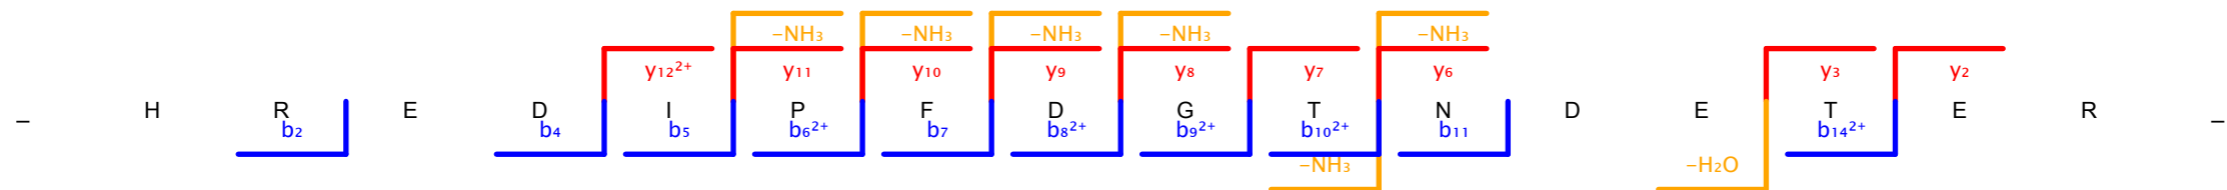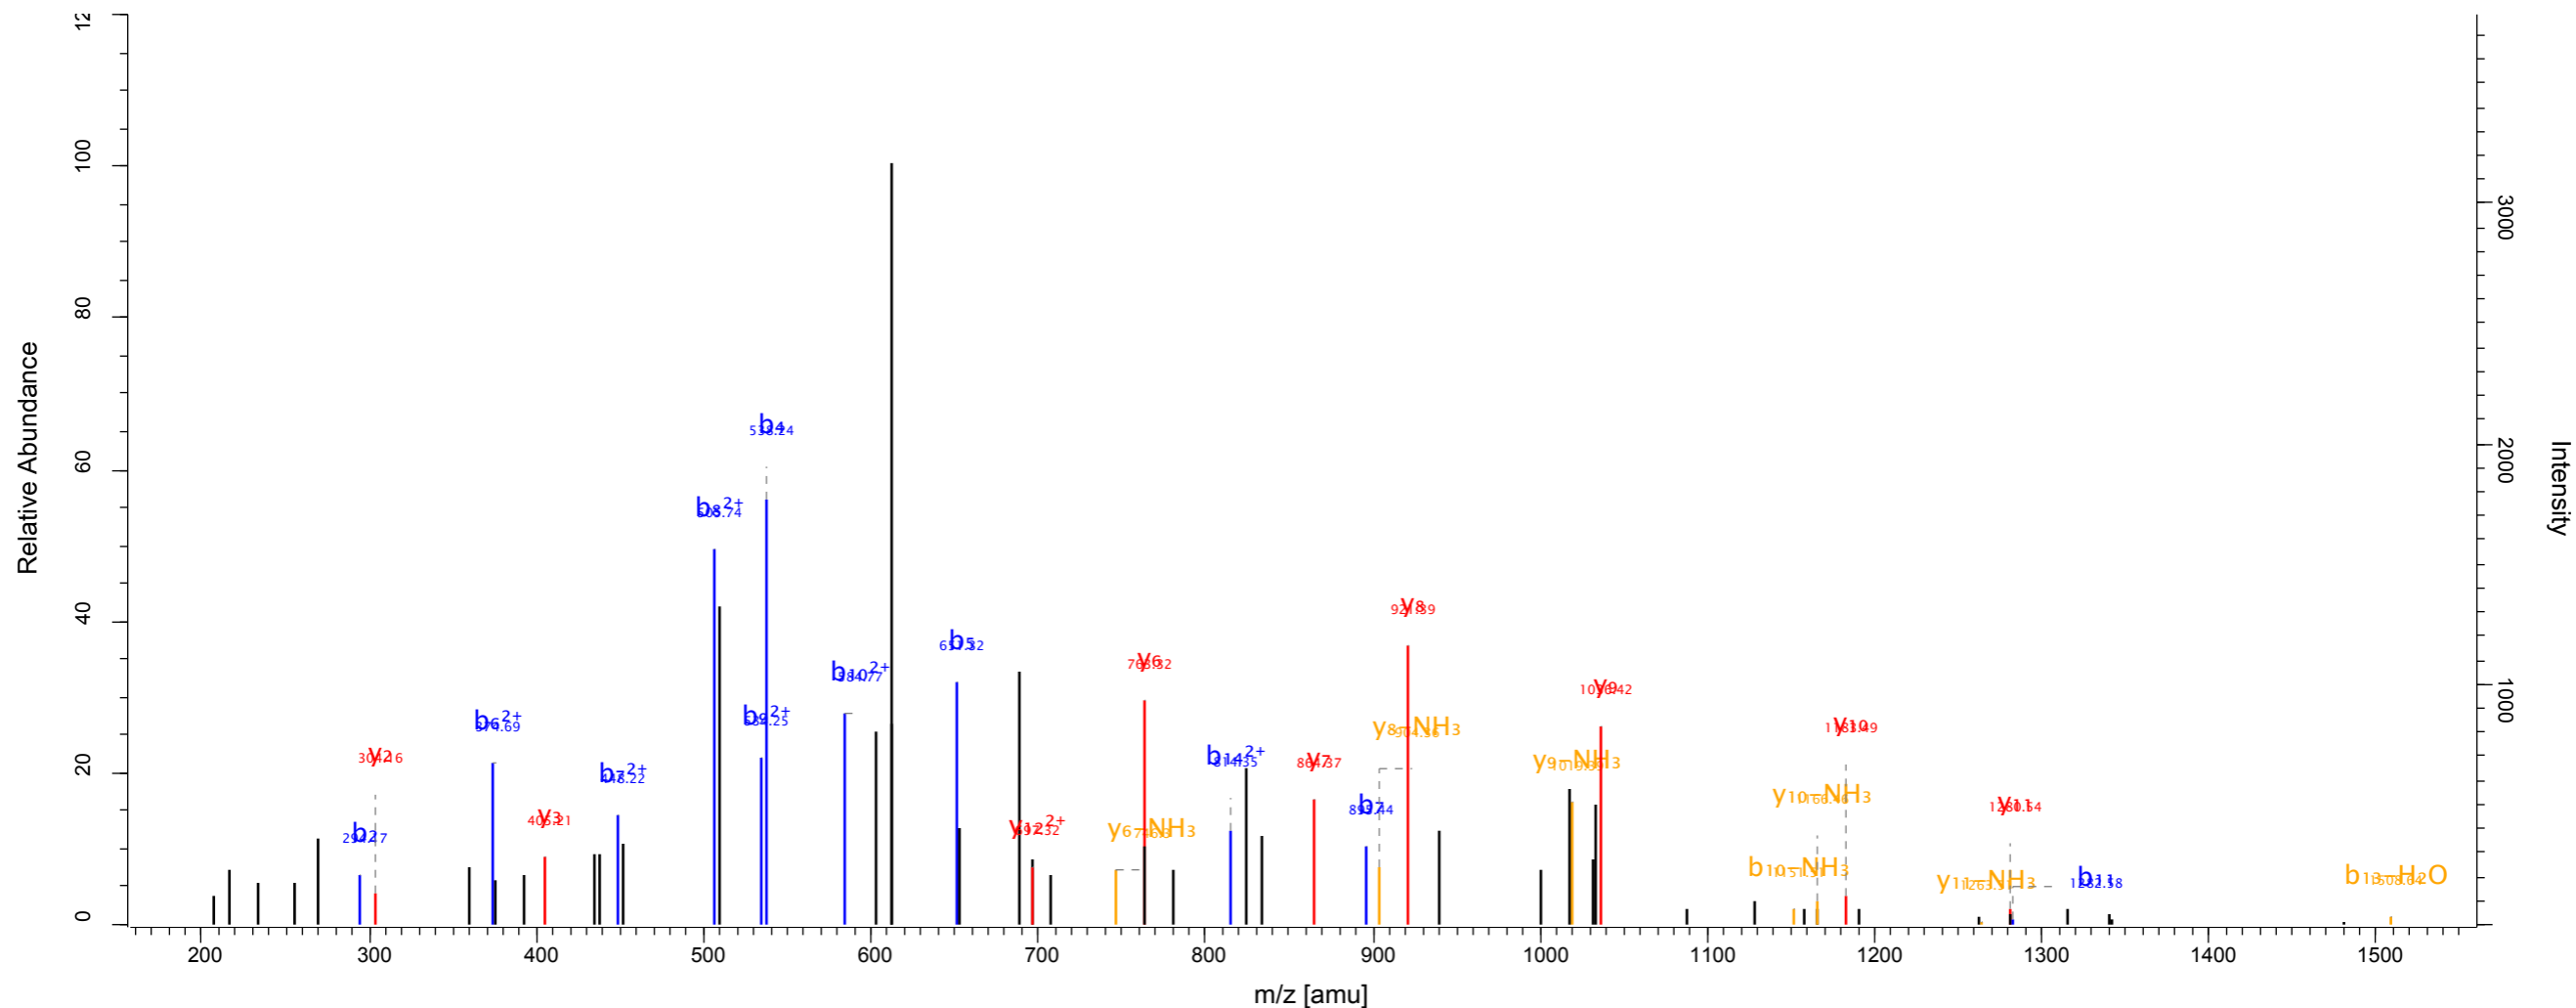

precursor information

|                   |                  |
|-------------------|------------------|
| Mass:             | 1020.84404       |
| m/z:              | 644.28862        |
| Charge:           | 2+               |
| Retention time:   | 20.5280640062370 |
| Score:            | 148.4758         |
| Mass Error [ppm]: | -0.65278         |
| DEP:              | 1.5423E-08       |
| Precursor Type:   | MULTI            |

| b <sup>2+</sup> ion |              | b ion      |              |     | y ion |          | y <sup>2+</sup> ion |              |              |
|---------------------|--------------|------------|--------------|-----|-------|----------|---------------------|--------------|--------------|
| Δ dalton            | mass         | Δ dalton   | mass         | seq |       | Δ dalton | mass                | Δ dalton     | mass         |
|                     | 138.06618833 |            | 138.06618833 | 1   | H     | 15       |                     |              |              |
|                     | 294.16729936 | +0.0429668 | 294.16729936 | 2   | R     | 14       | 1793.7936615        | 1793.7936615 |              |
|                     | 423.20989245 |            | 423.20989245 | 3   | E     | 13       | 1637.6925504        | 1637.6925504 |              |
|                     | 538.23683549 | +0.0038872 | 538.23683549 | 4   | D     | 12       | 1508.6499573        | 1508.6499573 |              |
|                     | 651.32089947 | -0.0636363 | 651.32089947 | 5   | I     | 11       | 1393.6230143        | 697.31514539 | -0.0201625   |
| -0.067091           | 374.69046989 |            | 748.37366332 | 6   | P     | 10       | 1280.5389503        | -0.1591896   | 1280.5389503 |
| +0.0625546          | 448.22467685 | -0.10144   | 895.44207723 | 7   | F     | 9        | 1183.4861865        | +0.0803418   | 1183.4861865 |
| -0.0363661          | 505.73814837 |            | 1010.4690203 | 8   | D     | 8        | 1036.4177726        | -0.0645011   | 1036.4177726 |
| -0.1435946          | 534.24888023 |            | 1067.490484  | 9   | G     | 7        | 921.39082952        | -0.0775361   | 921.39082952 |
| +0.2701882          | 584.77271947 |            | 1168.5381625 | 10  | T     | 6        | 864.3693658         | +0.0653876   | 864.3693658  |
|                     | 1282.5810899 | +0.1274062 | 1282.5810899 | 11  | N     | 5        | 763.32168733        | +0.043486    | 763.32168733 |
|                     | 1397.6080329 |            | 1397.6080329 | 12  | D     | 4        | 649.27875988        |              | 649.27875988 |
|                     | 1526.650626  |            | 1526.650626  | 13  | E     | 3        | 534.25181685        |              | 534.25181685 |
| +0.219292           | 814.35279049 |            | 1627.6983045 | 14  | T     | 2        | 405.20922375        | +0.0268602   | 405.20922375 |
|                     | 1756.7408976 |            | 1756.7408976 | 15  | E     | 1        | 304.16154528        | -0.1259618   | 304.16154528 |
|                     |              |            |              | 16  | R     | 0        | 175.11895218        |              | 175.11895218 |

general information

|                       |             |
|-----------------------|-------------|
| Annotation:           | 13 of 16    |
| AminoAcids Coverage:  | 81 %        |
| Intensity Coverage:   | 48 %        |
| Peak Coverage:        | 41 %        |
| Protein Localisation: | 255 ... 270 |

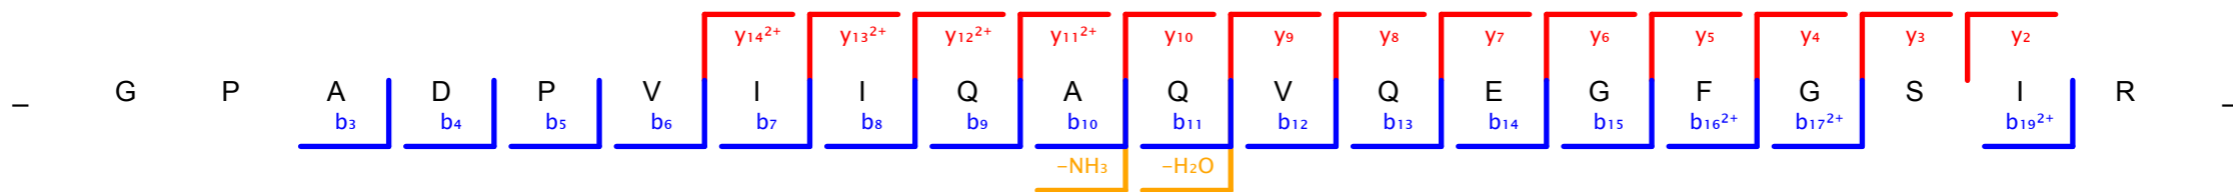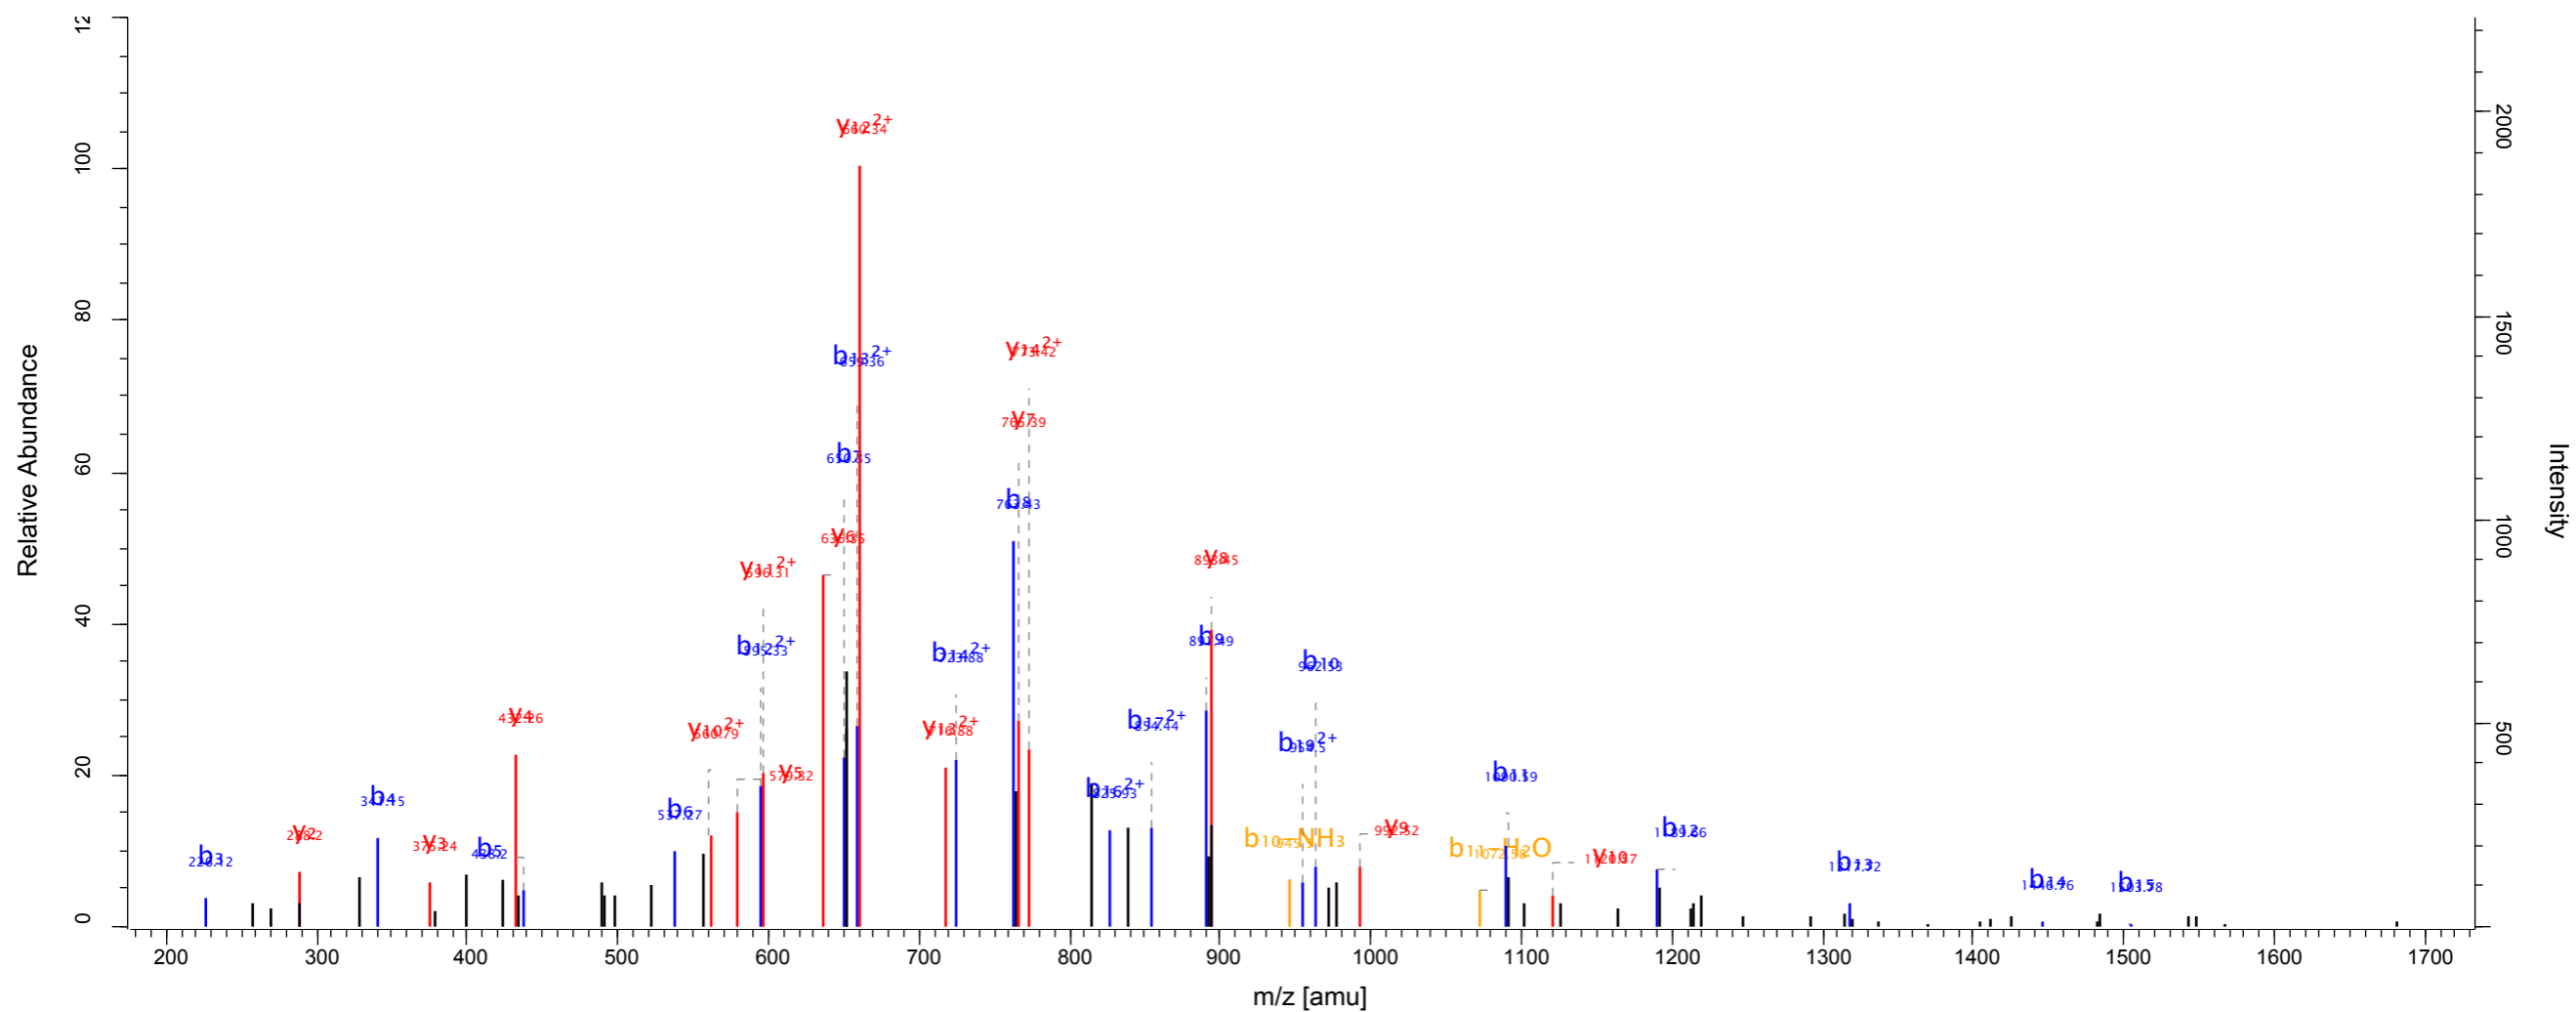

precursor information

|                   |                  |
|-------------------|------------------|
| Mass:             | 2081.00025       |
| m/z:              | 604.70406        |
| Charge:           | 2+               |
| Retention time:   | 07.7204104003006 |
| Score:            | 184.2221         |
| Mass Error (ppm): | -0.006822        |
| DEP:              | 2.07255_21       |
| Precursor Type:   | ISO              |

| b <sup>2+</sup> ion |              | b ion      |              |    |     |    | y ion        |            | y <sup>2+</sup> ion |            |
|---------------------|--------------|------------|--------------|----|-----|----|--------------|------------|---------------------|------------|
| Δ dalton            | mass         | Δ dalton   | mass         |    | seq |    | Δ dalton     | mass       | Δ dalton            | mass       |
|                     | 58.02874019  |            | 58.02874019  | 1  | G   | 19 |              |            |                     |            |
|                     | 155.08150404 |            | 155.08150404 | 2  | P   | 18 | 2025.0763657 |            | 2025.0763657        |            |
|                     | 226.11861783 | +0.1092569 | 226.11861783 | 3  | A   | 17 | 1928.0236018 |            | 1928.0236018        |            |
|                     | 341.14556086 | +0.008736  | 341.14556086 | 4  | D   | 16 | 1856.986488  |            | 1856.986488         |            |
|                     | 438.19832471 | -0.0057588 | 438.19832471 | 5  | P   | 15 | 1741.959545  |            | 1741.959545         |            |
|                     | 537.26673863 | +0.0132907 | 537.26673863 | 6  | V   | 14 | 1644.9067811 |            | 1644.9067811        |            |
|                     | 650.35080261 | +0.1890533 | 650.35080261 | 7  | I   | 13 | 1545.8383672 |            | 773.42282185        | +0.0920097 |
|                     | 763.43486659 | -0.0338046 | 763.43486659 | 8  | I   | 12 | 1432.7543032 |            | 716.88078986        | +0.2472009 |
|                     | 891.4934441  | -0.218969  | 891.4934441  | 9  | Q   | 11 | 1319.6702393 |            | 660.33875787        | +0.0767084 |
|                     | 962.53055789 | +0.0631311 | 962.53055789 | 10 | A   | 10 | 1191.6116618 |            | 596.30946911        | -0.1487025 |
|                     | 1090.5891354 | -0.4487545 | 1090.5891354 | 11 | Q   | 9  | 1120.574548  | -0.2763302 | 560.79091222        | +0.3523983 |
| -0.0855257          | 595.33241289 | -0.0625786 | 1189.6575493 | 12 | V   | 8  | 992.51597046 | -0.1219885 | 992.51597046        |            |
| +0.0204395          | 659.36170165 | +0.453795  | 1317.7161268 | 13 | Q   | 7  | 893.44755654 | -0.0684672 | 893.44755654        |            |
| -0.111819           | 723.8829982  | -0.1836467 | 1446.7587199 | 14 | E   | 6  | 765.38897903 | +0.0562724 | 765.38897903        |            |
|                     | 1503.7801836 | +0.439665  | 1503.7801836 | 15 | G   | 5  | 636.34638593 | -0.0050773 | 636.34638593        |            |
| +0.2253833          | 825.92793702 |            | 1650.8485976 | 16 | F   | 4  | 579.32492221 | -0.0511795 | 579.32492221        |            |
| +0.0300201          | 854.43866888 |            | 1707.8700613 | 17 | G   | 3  | 432.25650829 | +0.0909038 | 432.25650829        |            |
|                     | 1794.9020897 |            | 1794.9020897 | 18 | S   | 2  | 375.23504457 | +0.1824359 | 375.23504457        |            |
| -0.2648425          | 954.49671507 |            | 1907.9861537 | 19 | I   | 1  | 288.20301616 | -0.0158213 | 288.20301616        |            |
|                     |              |            |              | 20 | R   | 0  | 175.11895218 |            | 175.11895218        |            |

general information

|                       |             |
|-----------------------|-------------|
| Annotation:           | 17 of 20    |
| AminoAcids Coverage:  | 85 %        |
| Intensity Coverage:   | 71 %        |
| Peak Coverage:        | 44 %        |
| Protein Localisation: | 193 ... 212 |

Scan number 16061 Raw file 20091031\_Orbi6\_MaHe\_SA\_ADH\_exp3\_Laminin\_Re\_Gel07  
 Method ITMS; CID Genenames USF1;usf1-bd

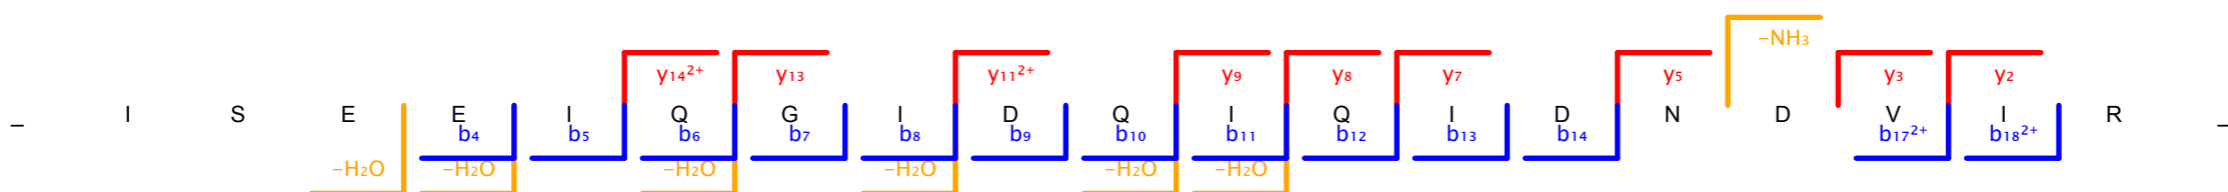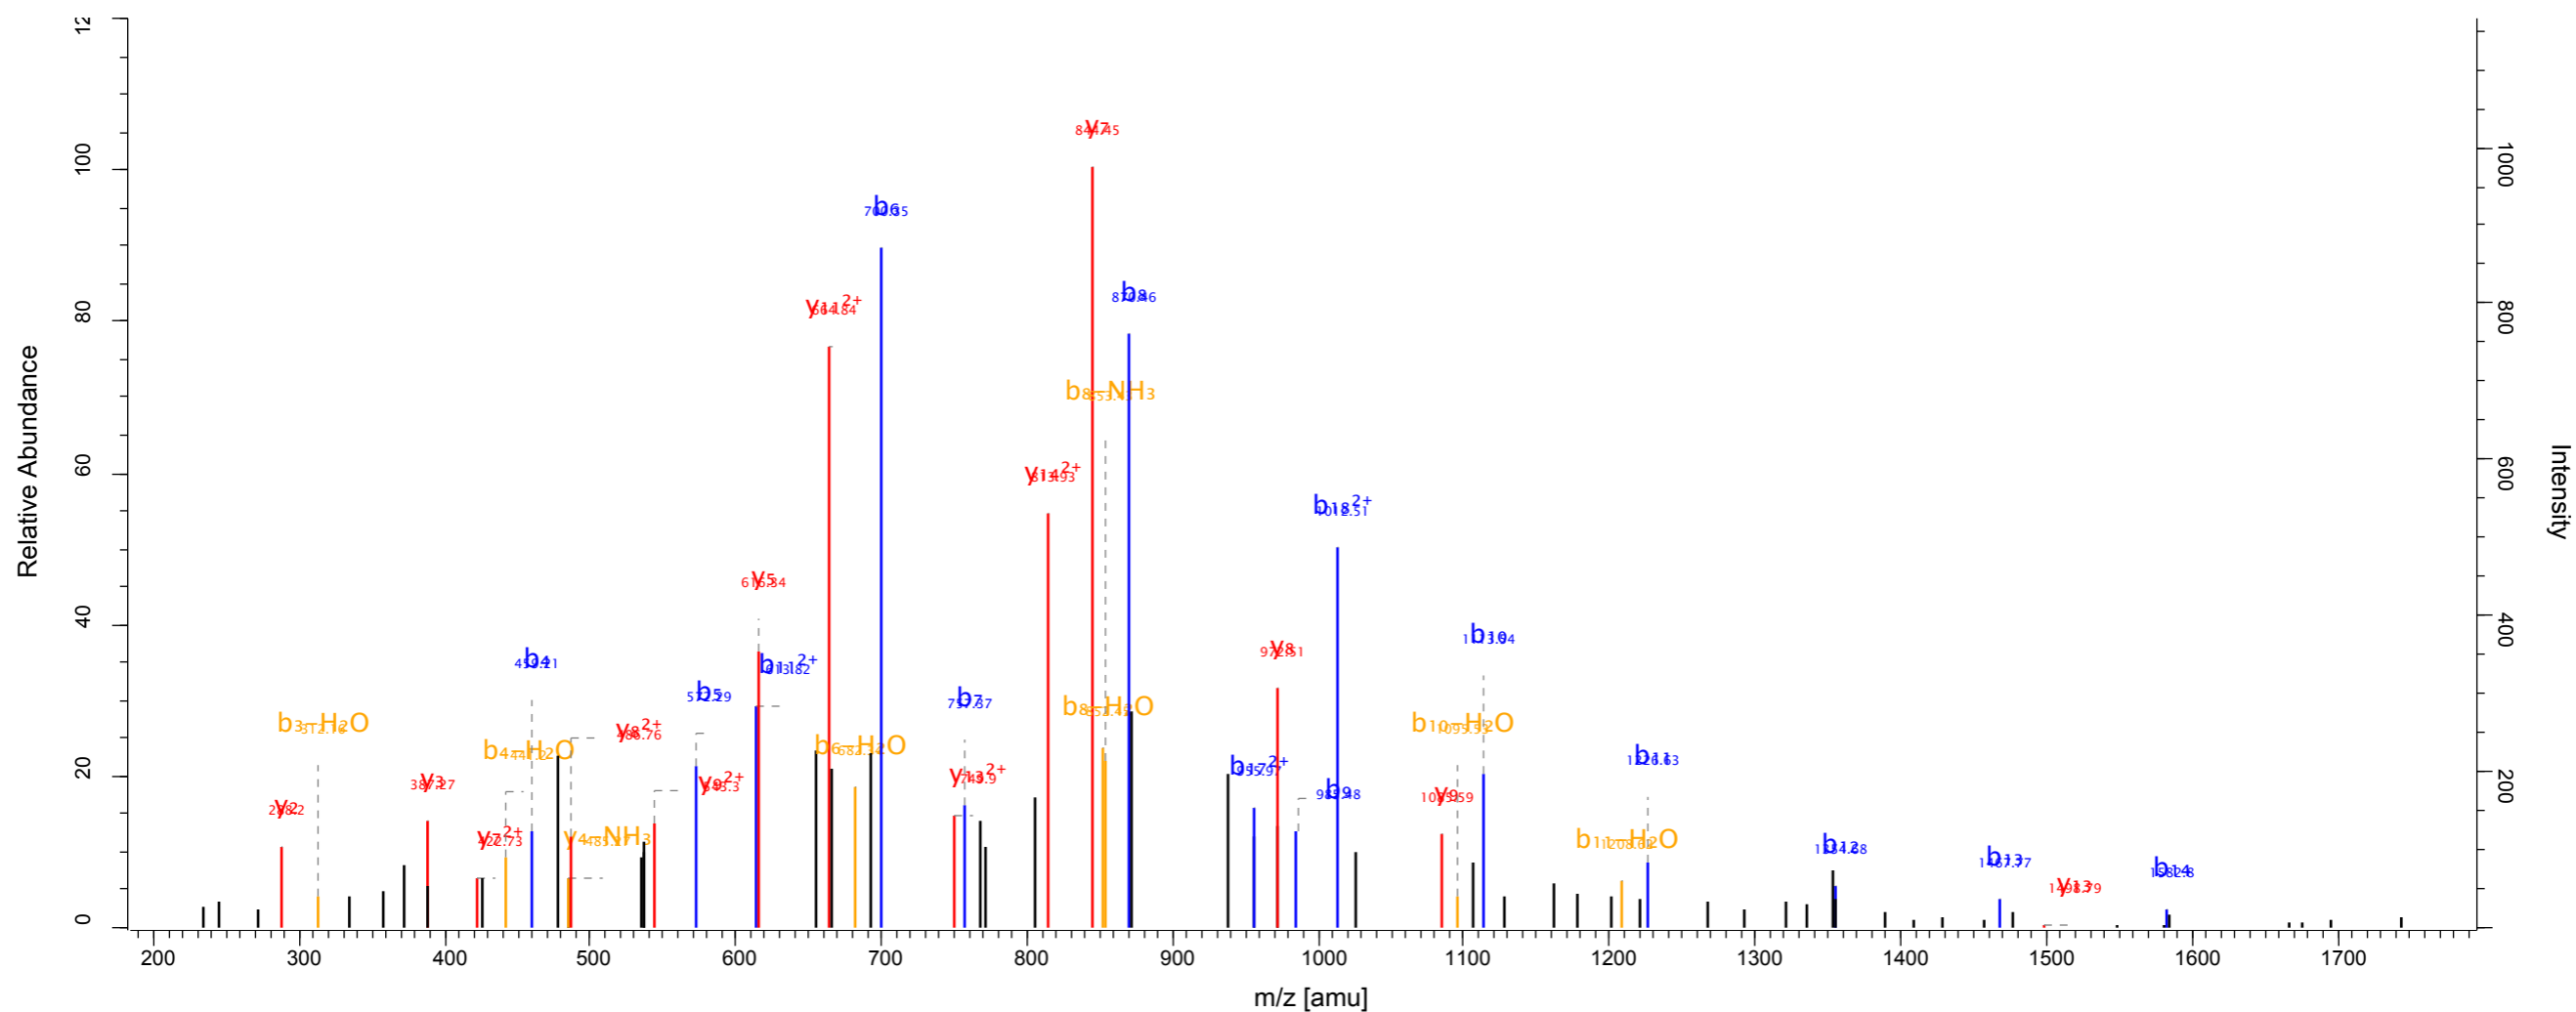

precursor information

|                   |                 |
|-------------------|-----------------|
| Mass:             | 2107.1228       |
| m/z:              | 722.28154       |
| Charge:           | 2+              |
| RetentionTime:    | 100.48021607008 |
| Score:            | 182.1520        |
| Mass Error (ppm): | 0.074221        |
| DEP:              | 1.25425_20      |
| Precursor Type:   | MULTI           |

general information

|                       |             |
|-----------------------|-------------|
| Annotation:           | 16 of 19    |
| AminoAcids Coverage:  | 84.0%       |
| Intensity Coverage:   | 70.0%       |
| Peak Coverage:        | 42.0%       |
| Protein Localisation: | 261 ... 279 |

| b <sup>2+</sup> ion |              | b ion      |              |    |     |    | y ion        |            | y <sup>2+</sup> ion |            |
|---------------------|--------------|------------|--------------|----|-----|----|--------------|------------|---------------------|------------|
| Δ dalton            | mass         | Δ dalton   | mass         |    | seq |    | Δ dalton     | mass       | Δ dalton            | mass       |
|                     | 114.09134045 |            | 114.09134045 | 1  | I   | 18 |              |            |                     |            |
|                     | 201.12336886 |            | 201.12336886 | 2  | S   | 17 | 2085.0458534 |            | 2085.0458534        |            |
|                     | 330.16596195 |            | 330.16596195 | 3  | E   | 16 | 1998.013825  |            | 1998.013825         |            |
|                     | 459.20855505 | +0.0584738 | 459.20855505 | 4  | E   | 15 | 1868.9712319 |            | 1868.9712319        |            |
|                     | 572.29261903 | +0.0167071 | 572.29261903 | 5  | I   | 14 | 1739.9286388 |            | 1739.9286388        |            |
|                     | 700.35119654 | -0.0601199 | 700.35119654 | 6  | Q   | 13 | 1626.8445748 |            | 813.92592564        | -0.1686625 |
|                     | 757.37266026 | -0.1581217 | 757.37266026 | 7  | G   | 12 | 1498.7859973 | -0.212511  | 749.89663689        | +0.4918519 |
|                     | 870.45672425 | -0.1363507 | 870.45672425 | 8  | I   | 11 | 1441.7645336 |            | 1441.7645336        |            |
|                     | 985.48366728 | -0.17074   | 985.48366728 | 9  | D   | 10 | 1328.6804696 |            | 664.84387304        | -0.1170054 |
|                     | 1113.5422448 | -0.2863854 | 1113.5422448 | 10 | Q   | 9  | 1213.6535266 |            | 1213.6535266        |            |
| -0.0428668          | 613.81679262 | -0.2495998 | 1226.6263088 | 11 | I   | 8  | 1085.5949491 | -0.1200955 | 543.30111276        | +0.1756328 |
|                     | 1354.6848863 | -0.0019029 | 1354.6848863 | 12 | Q   | 7  | 972.51088508 | +0.0571691 | 486.75908077        | -0.1045398 |
|                     | 1467.7689503 | -0.1100147 | 1467.7689503 | 13 | I   | 6  | 844.45230757 | -0.0273808 | 422.72979202        | -0.1079658 |
|                     | 1582.7958933 | -0.0689646 | 1582.7958933 | 14 | D   | 5  | 731.36824359 |            | 731.36824359        |            |
|                     | 1696.8388207 |            | 1696.8388207 | 15 | N   | 4  | 616.34130056 | -0.0793377 | 616.34130056        |            |
|                     | 1811.8657638 |            | 1811.8657638 | 16 | D   | 3  | 502.29837311 |            | 502.29837311        |            |
| -0.1518184          | 955.97072708 |            | 1910.9341777 | 17 | V   | 2  | 387.27143008 | +0.1334161 | 387.27143008        |            |
| +0.0349094          | 1012.5127591 |            | 2024.0182417 | 18 | I   | 1  | 288.20301616 | +0.1185781 | 288.20301616        |            |
|                     |              |            |              | 19 | R   | 0  | 175.11895218 |            | 175.11895218        |            |



Scan number 17974 Raw file 20091031\_Orbi6\_MaHe\_SA\_ADH\_exp3\_Laminin\_Re\_Gel07  
 Method ITMS; CID Genenames DUSP6

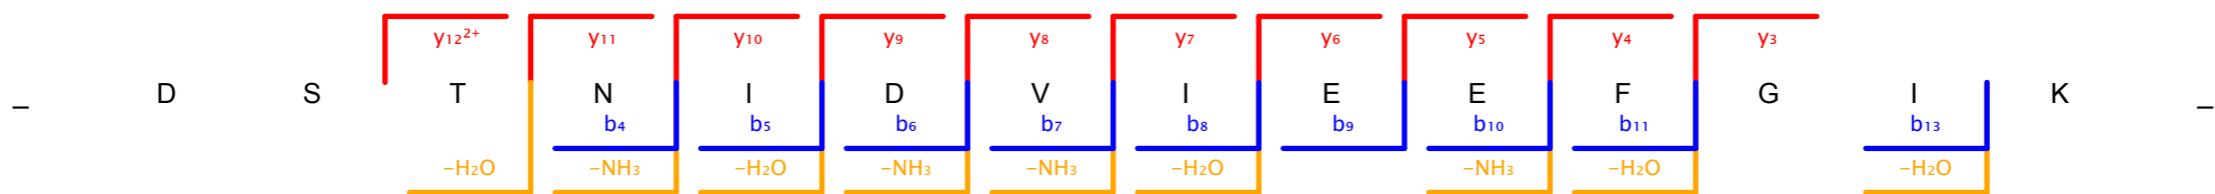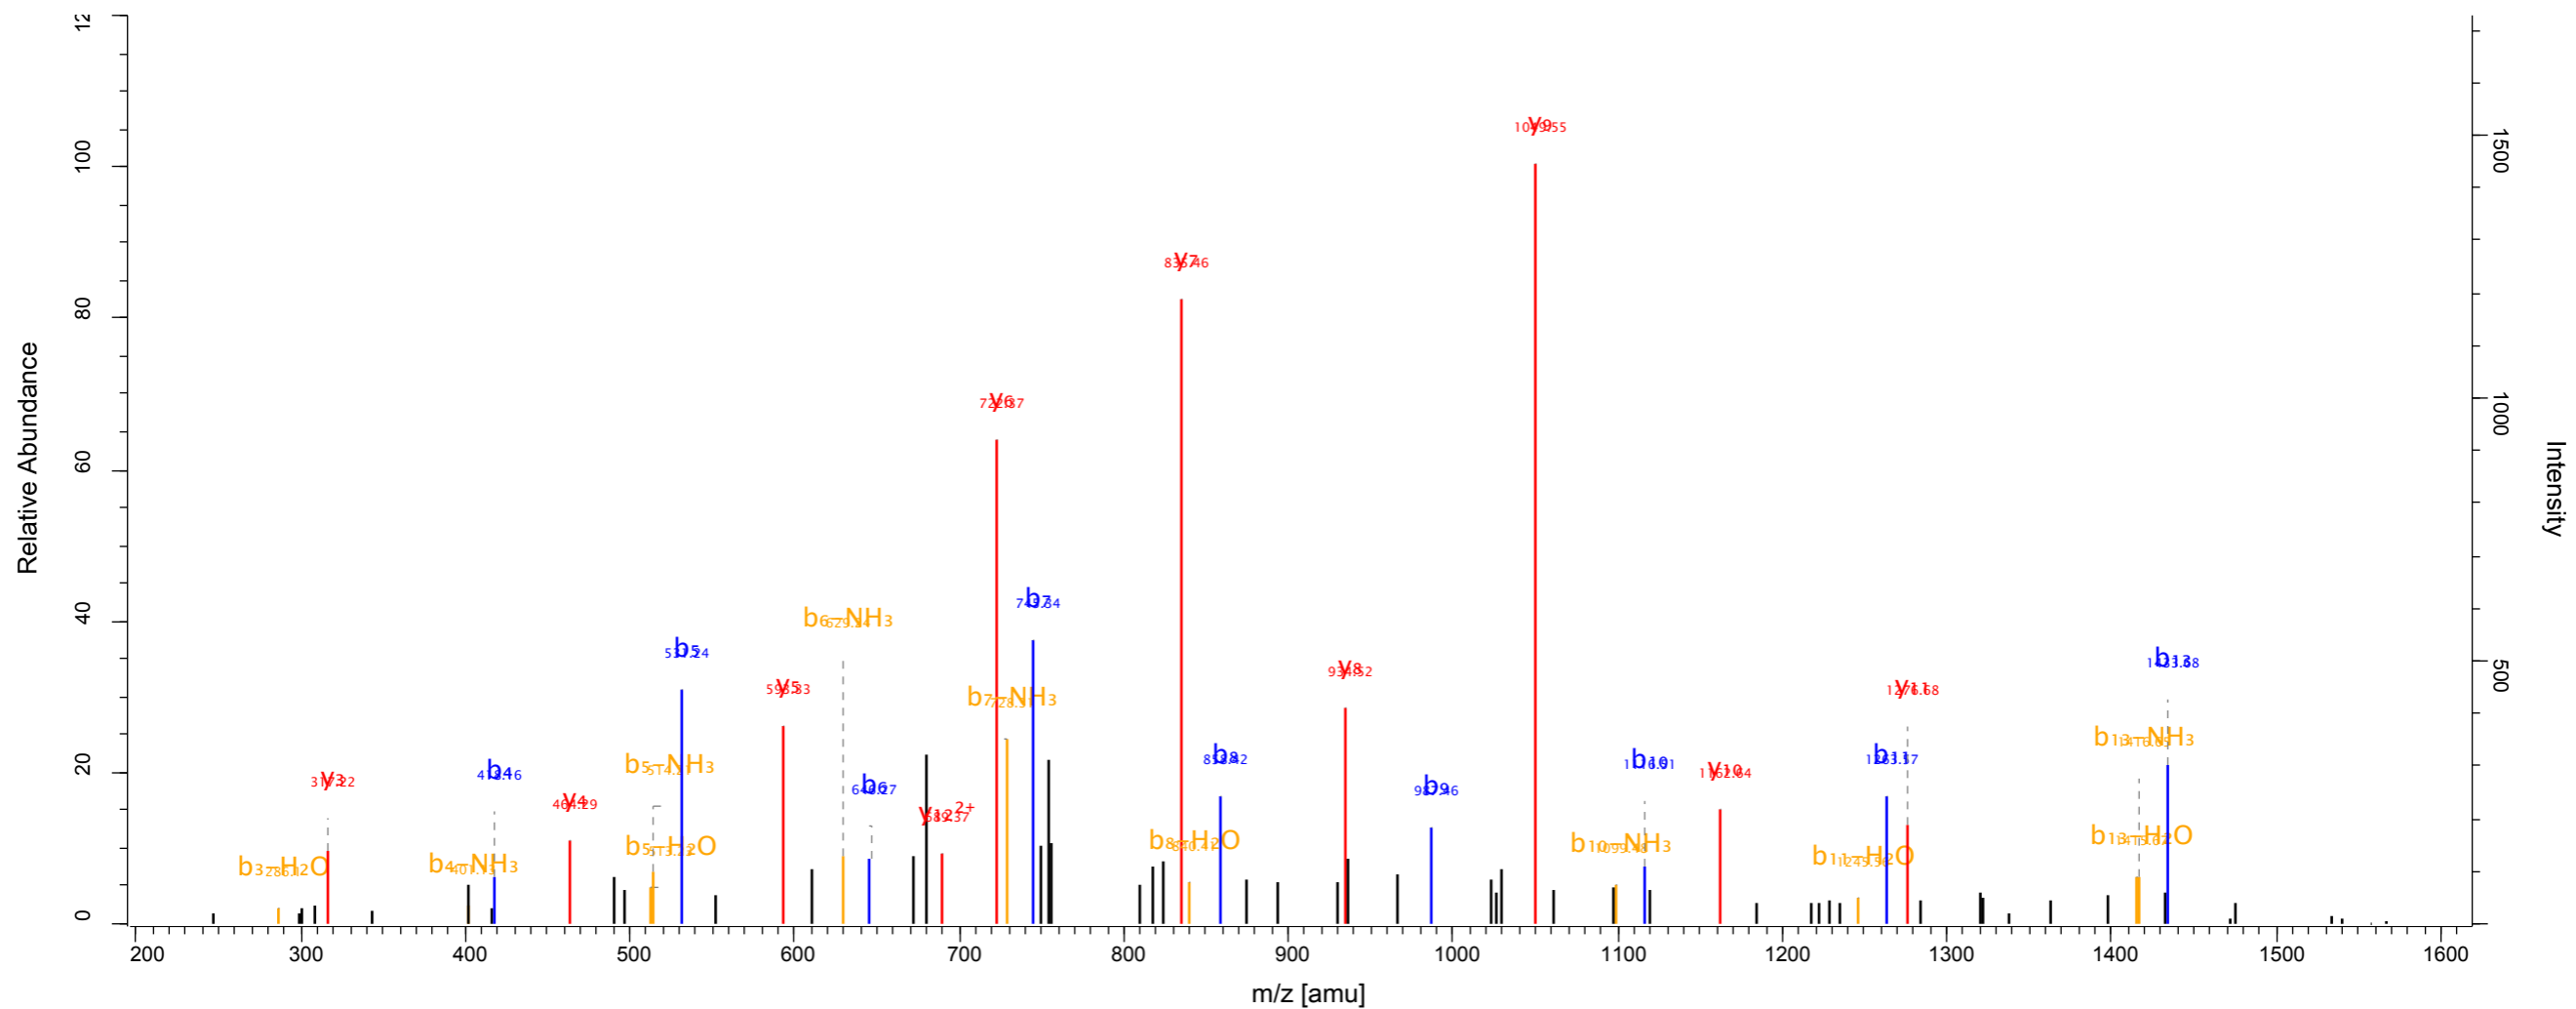

precursor information

|                   |                 |
|-------------------|-----------------|
| Mass:             | 1578.7785       |
| m/z:              | 700.20652       |
| Charge:           | 2+              |
| Potentialtime:    | 112.47286022372 |
| Score:            | 200.1268        |
| Mass Error [ppm]: | 0.40554         |
| PEP:              | 1.2570516       |
| Precursor Type:   | ISO             |

general information

|                       |             |
|-----------------------|-------------|
| Annotation:           | 11 of 14    |
| AminoAcids Coverage:  | 70 %        |
| Intensity Coverage:   | 71 %        |
| Peak Coverage:        | 38 %        |
| Protein Localisation: | 221 ... 234 |

| b ion      |                |    |     |    | y ion          |            | y <sup>2+</sup> ion |            |
|------------|----------------|----|-----|----|----------------|------------|---------------------|------------|
| Δ dalton   | mass           |    | seq |    | Δ dalton       | mass       | Δ dalton            | mass       |
|            | 116.034219499  | 1  | D   | 13 |                |            |                     |            |
|            | 203.066247908  | 2  | S   | 12 | 1464.758051223 |            | 1464.758051223      |            |
|            | 304.113926383  | 3  | T   | 11 | 1377.726022814 |            | 689.36664964        | +0.0757332 |
| -0.3395931 | 418.15685383   | 4  | N   | 10 | 1276.678344339 | +0.0187992 | 1276.678344339      |            |
| -0.0597044 | 531.24091781   | 5  | I   | 9  | 1162.635416892 | -0.2301435 | 1162.635416892      |            |
| -0.1545186 | 646.267860842  | 6  | D   | 8  | 1049.551352912 | -0.2327494 | 1049.551352912      |            |
| -0.0959183 | 745.336274758  | 7  | V   | 7  | 934.52440988   | -0.2047688 | 934.52440988        |            |
| +0.0192365 | 858.420338739  | 8  | I   | 6  | 835.455995964  | -0.0288109 | 835.455995964       |            |
| -0.2415573 | 987.462931835  | 9  | E   | 5  | 722.371931983  | -0.0342855 | 722.371931983       |            |
| -0.2984937 | 1116.505524931 | 10 | E   | 4  | 593.329338887  | +0.0005561 | 593.329338887       |            |
| -0.1640267 | 1263.573938847 | 11 | F   | 3  | 464.286745791  | -0.1444728 | 464.286745791       |            |
|            | 1320.595402571 | 12 | G   | 2  | 317.218331875  | -0.1306244 | 317.218331875       |            |
| -0.192406  | 1433.679466551 | 13 | I   | 1  | 260.196868151  |            | 260.196868151       |            |
|            |                | 14 | K   | 0  | 147.112804171  |            | 147.112804171       |            |

Scan number 17308 Raw file 20091031\_Orbi6\_MaHe\_SA\_ADH\_exp3\_Laminin\_Re\_Gel08  
 Method ITMS; CID Genenames SHARPIN

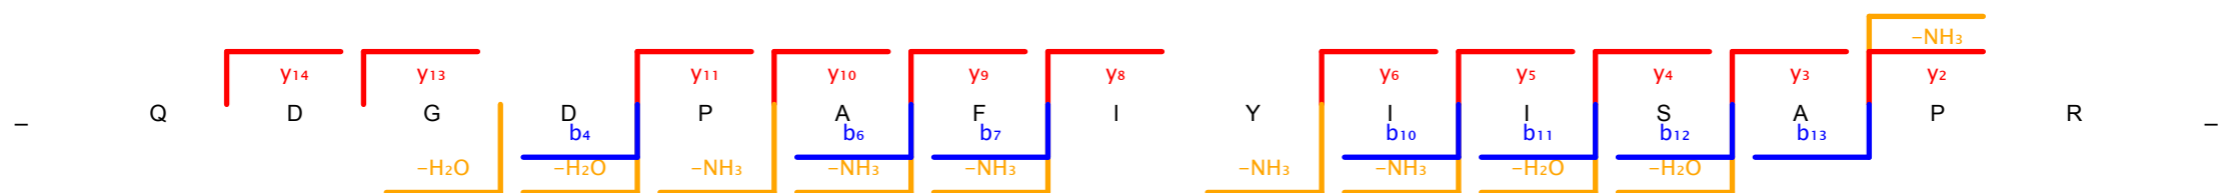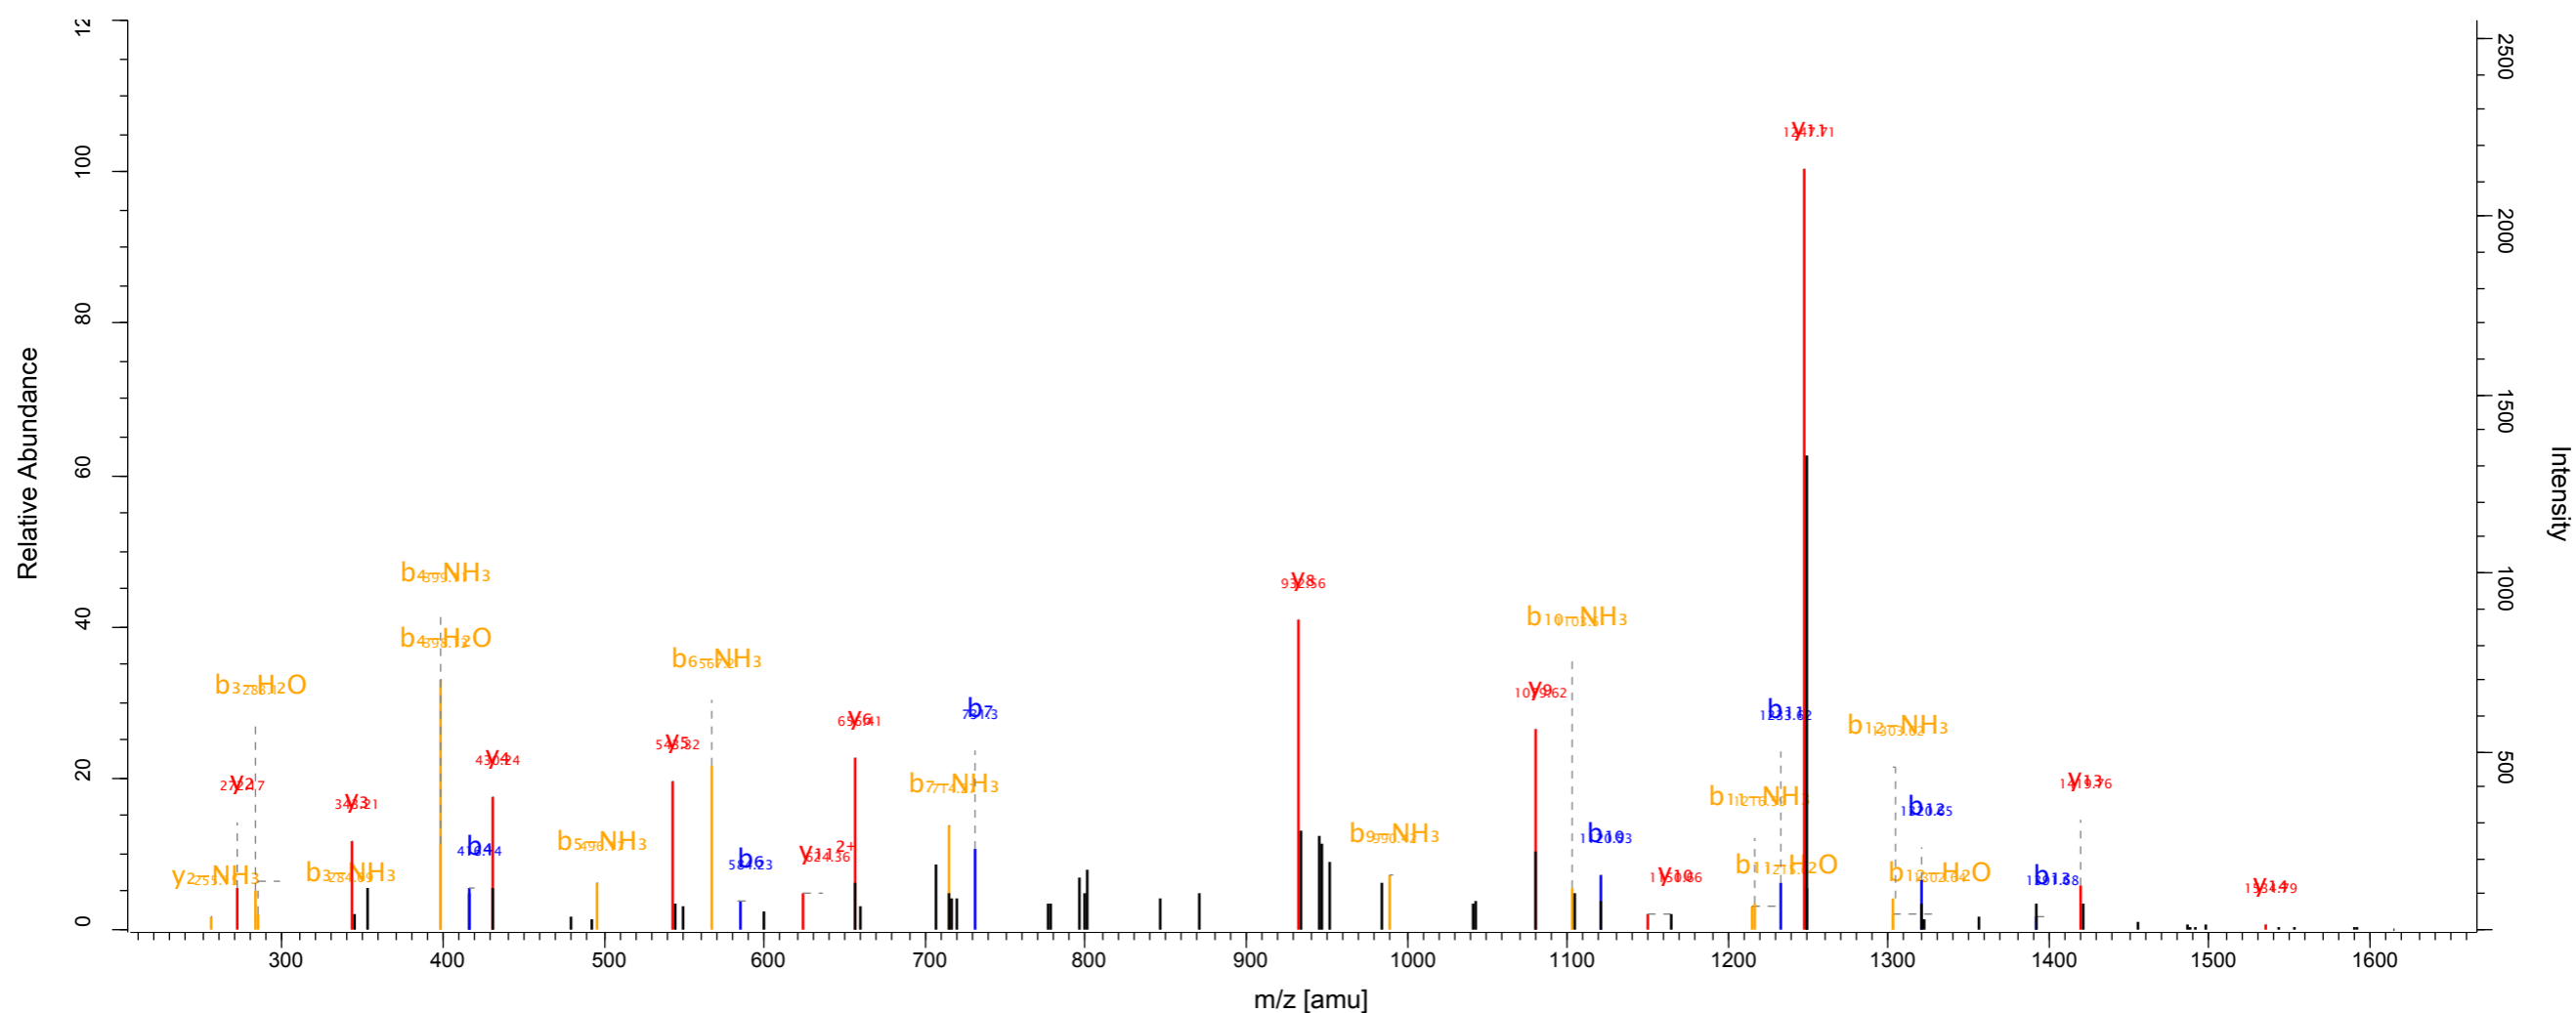

precursor information

|                   |                  |
|-------------------|------------------|
| Mass:             | 1661.81082       |
| m/z:              | 821.02760        |
| Charge:           | 2+               |
| Potentia time:    | 108.626510620117 |
| Score:            | 176.8722         |
| Mass Error [ppm]: | -0.20842         |
| PEP:              | 1.2011E-11       |
| Precursor Type:   | ISO              |

| b ion      |                |    |     |    | y ion          |            | y <sup>2+</sup> ion |            |
|------------|----------------|----|-----|----|----------------|------------|---------------------|------------|
| Δ dalton   | mass           |    | seq |    | Δ dalton       | mass       | Δ dalton            | mass       |
|            | 129.065853978  | 1  | Q   | 14 |                |            |                     |            |
|            | 244.09279701   | 2  | D   | 13 | 1534.790020054 | +0.2011909 | 1534.790020054      |            |
|            | 301.114260734  | 3  | G   | 12 | 1419.763077022 | -0.1399081 | 1419.763077022      |            |
| +0.1143504 | 416.141203766  | 4  | D   | 11 | 1362.741613298 |            | 1362.741613298      |            |
|            | 513.193967618  | 5  | P   | 10 | 1247.714670266 | -0.1590062 | 624.360973366       | +0.2072639 |
| +0.106504  | 584.231081405  | 6  | A   | 9  | 1150.661906414 | +0.1059159 | 1150.661906414      |            |
| +0.0010418 | 731.299495322  | 7  | F   | 8  | 1079.624792626 | +0.013513  | 1079.624792626      |            |
|            | 844.383559302  | 8  | I   | 7  | 932.55637871   | -0.1127752 | 932.55637871        |            |
|            | 1007.44688784  | 9  | Y   | 6  | 819.47231473   |            | 819.47231473        |            |
| -0.0703805 | 1120.530951821 | 10 | I   | 5  | 656.408986192  | -0.0429584 | 656.408986192       |            |
| -0.1999767 | 1233.615015801 | 11 | I   | 4  | 543.324922211  | +0.0541061 | 543.324922211       |            |
| -0.245555  | 1320.647044211 | 12 | S   | 3  | 430.240858231  | -0.0367567 | 430.240858231       |            |
| -0.2254178 | 1391.684157999 | 13 | A   | 2  | 343.208829821  | +0.0644856 | 343.208829821       |            |
|            | 1488.736921851 | 14 | P   | 1  | 272.171716033  | -0.0789426 | 272.171716033       |            |
|            |                | 15 | R   | 0  | 175.118952181  |            | 175.118952181       |            |

general information

|                       |             |
|-----------------------|-------------|
| Annotation:           | 13 of 15    |
| AminoAcids Coverage:  | 87%         |
| Intensity Coverage:   | 61%         |
| Peak Coverage:        | 40%         |
| Protein Localisation: | 290 ... 304 |

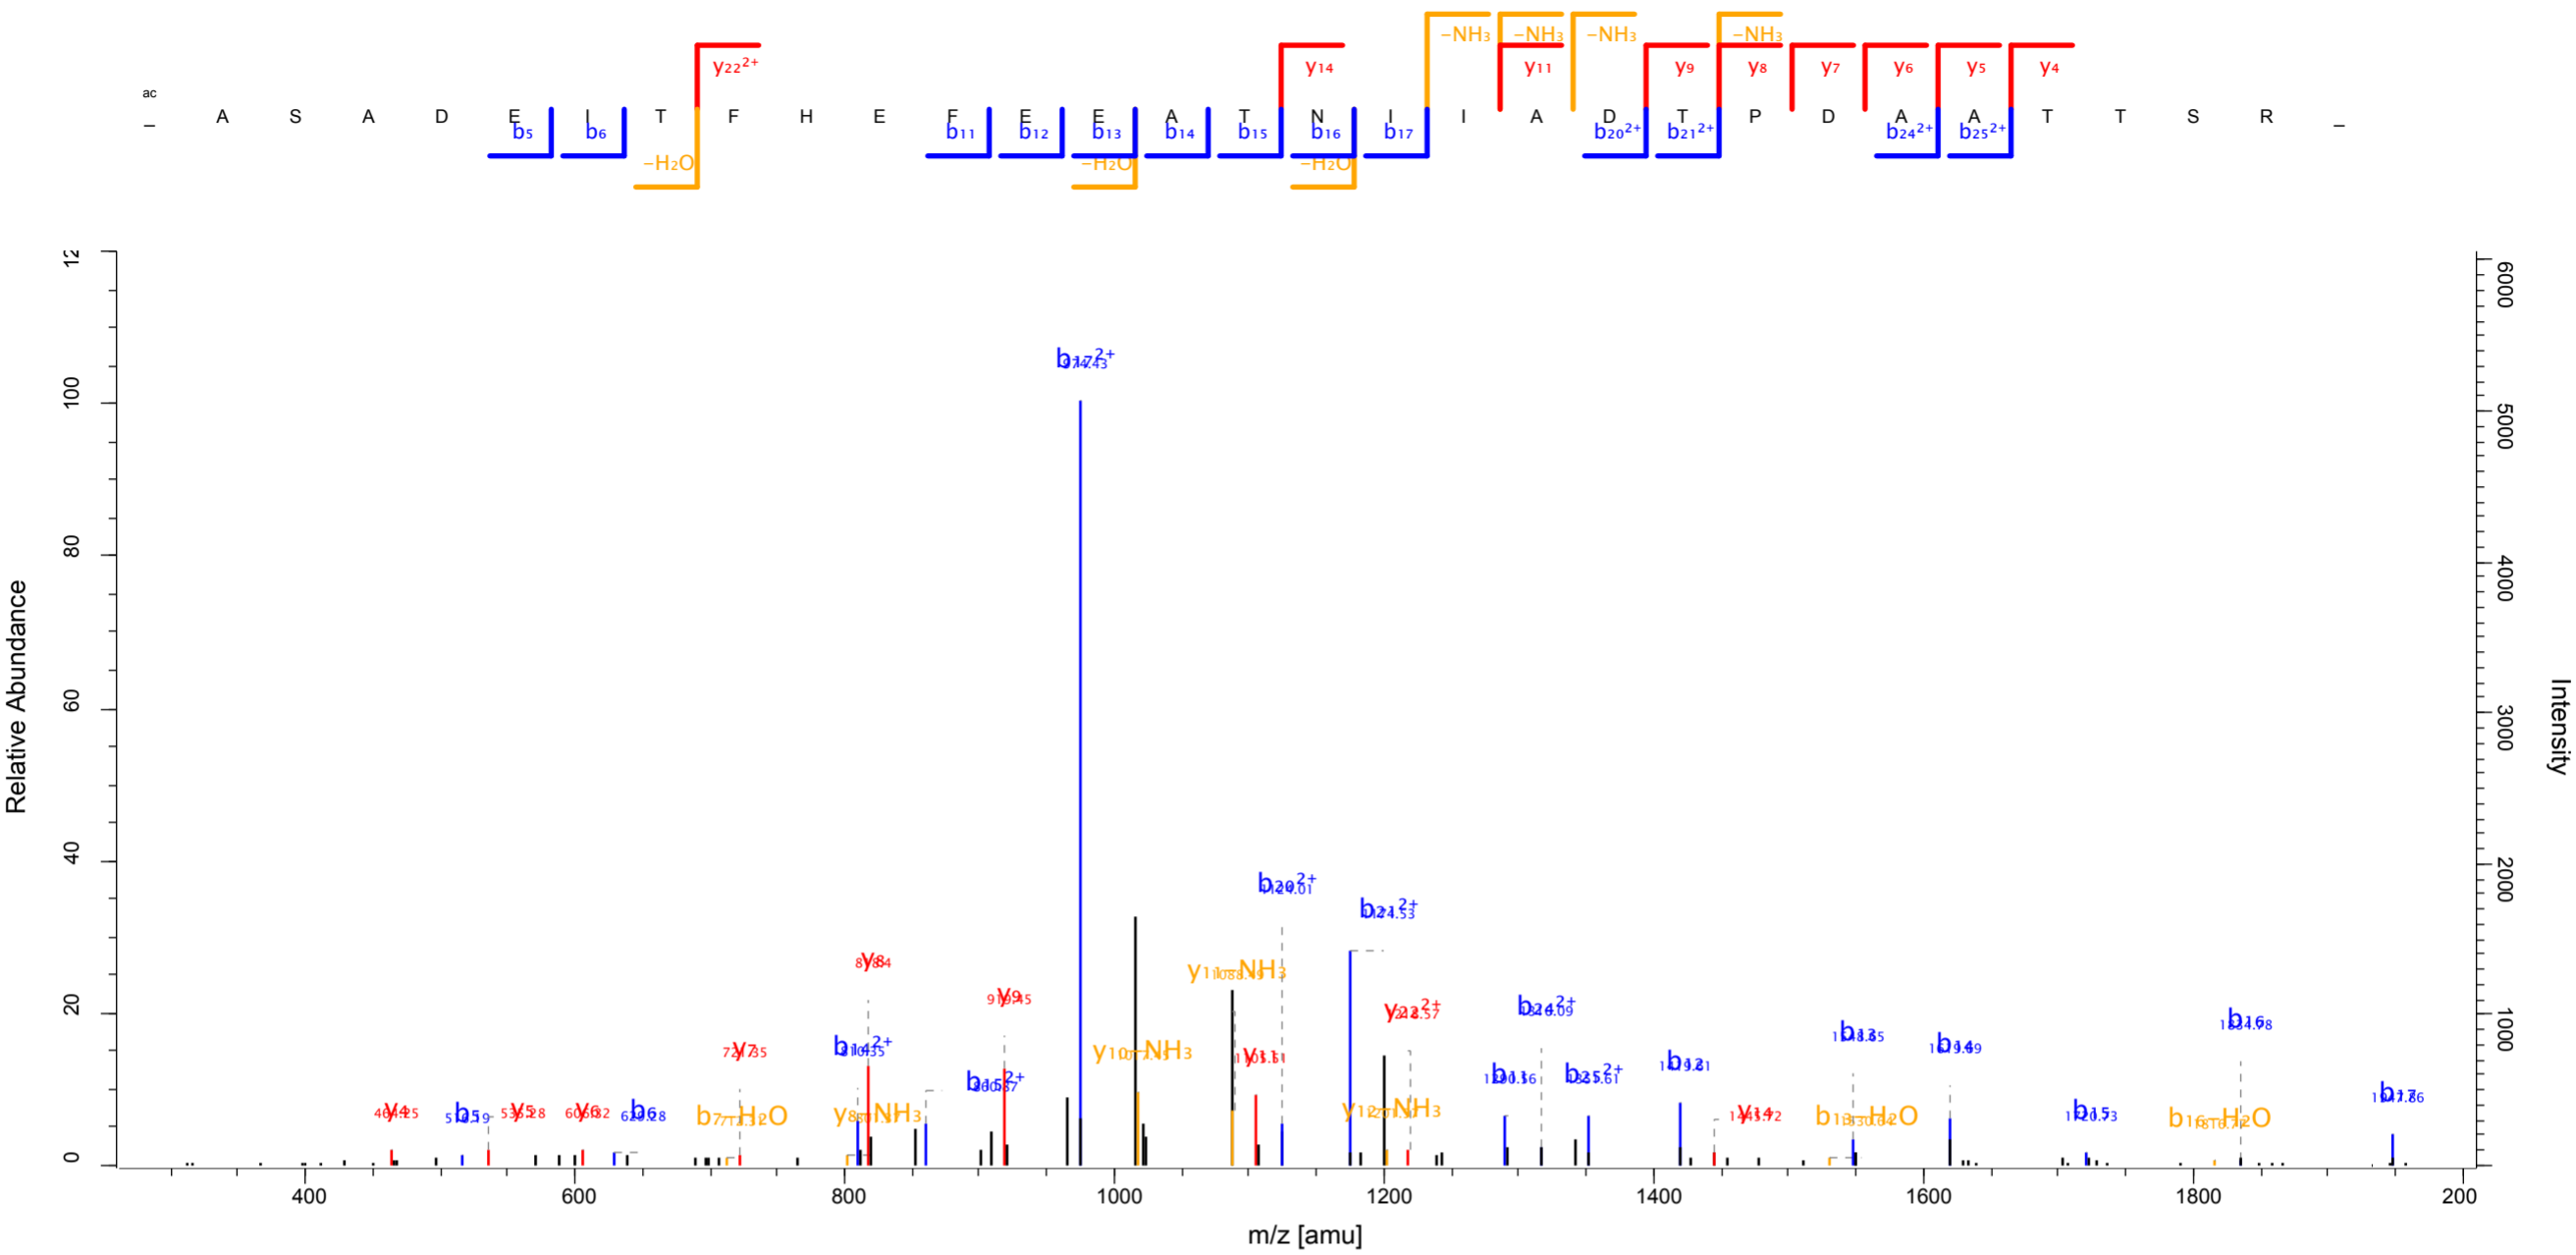

precursor information

|                   |                  |
|-------------------|------------------|
| Mass:             | 2164.44265       |
| m/z:              | 1055.82140       |
| Charge:           | 2+               |
| Retention time:   | 110.056748062402 |
| Score:            | 124.8145         |
| Mass Error (ppm): | 0.14267          |
| PEP:              | 1.6040527        |
| Precursor Type:   | MULTI            |

| b <sup>2+</sup> ion |              | b ion      |              |    |     |    | y ion        |            | y <sup>2+</sup> ion |            |
|---------------------|--------------|------------|--------------|----|-----|----|--------------|------------|---------------------|------------|
| Δ dalton            | mass         | Δ dalton   | mass         |    | seq |    | Δ dalton     | mass       | Δ dalton            | mass       |
|                     | 114.05495494 |            | 114.05495494 | 1  | A   | 28 |              |            |                     |            |
|                     | 201.08698335 |            | 201.08698335 | 2  | S   | 27 | 3052.4017947 |            | 3052.4017947        |            |
|                     | 272.12409714 |            | 272.12409714 | 3  | A   | 26 | 2965.3697663 |            | 2965.3697663        |            |
|                     | 387.15104017 |            | 387.15104017 | 4  | D   | 25 | 2894.3326525 |            | 2894.3326525        |            |
|                     | 516.19363327 | -0.0987236 | 516.19363327 | 5  | E   | 24 | 2779.3057095 |            | 2779.3057095        |            |
|                     | 629.27769725 | -0.0920893 | 629.27769725 | 6  | I   | 23 | 2650.2631164 |            | 2650.2631164        |            |
|                     | 730.32537572 |            | 730.32537572 | 7  | T   | 22 | 2537.1790524 |            | 2537.1790524        |            |
|                     | 877.39378964 |            | 877.39378964 | 8  | F   | 21 | 2436.1313739 |            | 1218.5693252        | -0.1754043 |
|                     | 1014.4527015 |            | 1014.4527015 | 9  | H   | 20 | 2289.06296   |            | 2289.06296          |            |
|                     | 1143.4952946 |            | 1143.4952946 | 10 | E   | 19 | 2152.0040482 |            | 2152.0040482        |            |
|                     | 1290.5637085 | -0.2090943 | 1290.5637085 | 11 | F   | 18 | 2022.9614551 |            | 2022.9614551        |            |
|                     | 1419.6063016 | -0.3237088 | 1419.6063016 | 12 | E   | 17 | 1875.8930412 |            | 1875.8930412        |            |
|                     | 1548.6488947 | +0.0215155 | 1548.6488947 | 13 | E   | 16 | 1746.8504481 |            | 1746.8504481        |            |
| -0.0530634          | 810.34664248 | -0.093113  | 1619.6860085 | 14 | A   | 15 | 1617.807855  |            | 1617.807855         |            |
| -0.1234114          | 860.87048172 | -0.0698686 | 1720.733687  | 15 | T   | 14 | 1546.7707412 |            | 1546.7707412        |            |
|                     | 1834.7766144 | -0.1102326 | 1834.7766144 | 16 | N   | 13 | 1445.7230627 | -0.1720373 | 1445.7230627        |            |
| +0.1124093          | 974.43397743 | +0.0195706 | 1947.8606784 | 17 | I   | 12 | 1331.6801353 |            | 1331.6801353        |            |
|                     | 2060.9447424 |            | 2060.9447424 | 18 | I   | 11 | 1218.5960713 |            | 1218.5960713        |            |
|                     | 2131.9818562 |            | 2131.9818562 | 19 | A   | 10 | 1105.5120073 | -0.0835405 | 1105.5120073        |            |
| +0.3608587          | 1124.0080378 |            | 2247.0087992 | 20 | D   | 9  | 1034.4748935 |            | 1034.4748935        |            |
| +0.1047196          | 1174.5318771 |            | 2348.0564777 | 21 | T   | 8  | 919.44795047 | -0.0935804 | 919.44795047        |            |
|                     | 2445.1092415 |            | 2445.1092415 | 22 | P   | 7  | 818.400272   | -0.0450474 | 818.400272          |            |
|                     | 2560.1361846 |            | 2560.1361846 | 23 | D   | 6  | 721.34750815 | +0.0941422 | 721.34750815        |            |
| -0.2334759          | 1316.0902874 |            | 2631.1732983 | 24 | A   | 5  | 606.32056511 | -0.000985  | 606.32056511        |            |
| -0.021564           | 1351.6088443 |            | 2702.2104121 | 25 | A   | 4  | 535.28345133 | -0.0272257 | 535.28345133        |            |
|                     | 2803.2580906 |            | 2803.2580906 | 26 | T   | 3  | 464.24633754 | -0.310577  | 464.24633754        |            |
|                     | 2904.3057691 |            | 2904.3057691 | 27 | T   | 2  | 363.19865906 |            | 363.19865906        |            |
|                     | 2991.3377975 |            | 2991.3377975 | 28 | S   | 1  | 262.15098059 |            | 262.15098059        |            |
|                     |              |            |              | 29 | R   | 0  | 175.11895218 |            | 175.11895218        |            |

general information

|                       |          |
|-----------------------|----------|
| Annotation:           | 20 of 30 |
| AminoAcids Coverage:  | 60%      |
| Intensity Coverage:   | 50%      |
| Peak Coverage:        | 22%      |
| Protein Localisation: | 2 ... 30 |

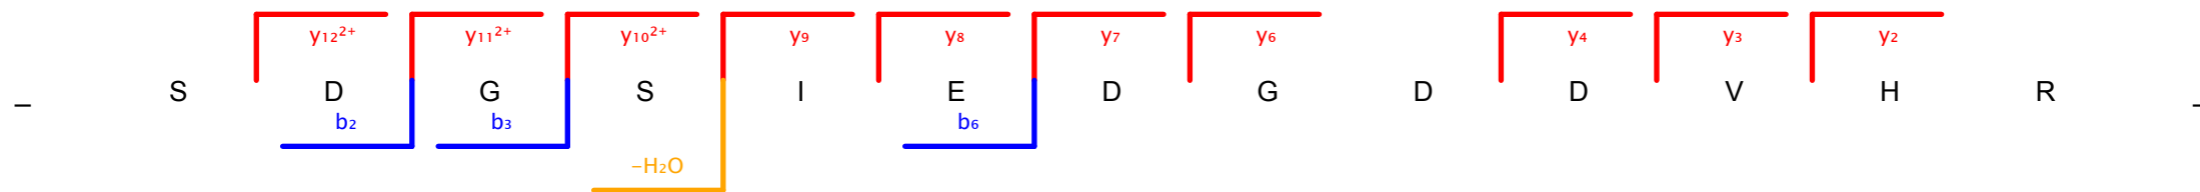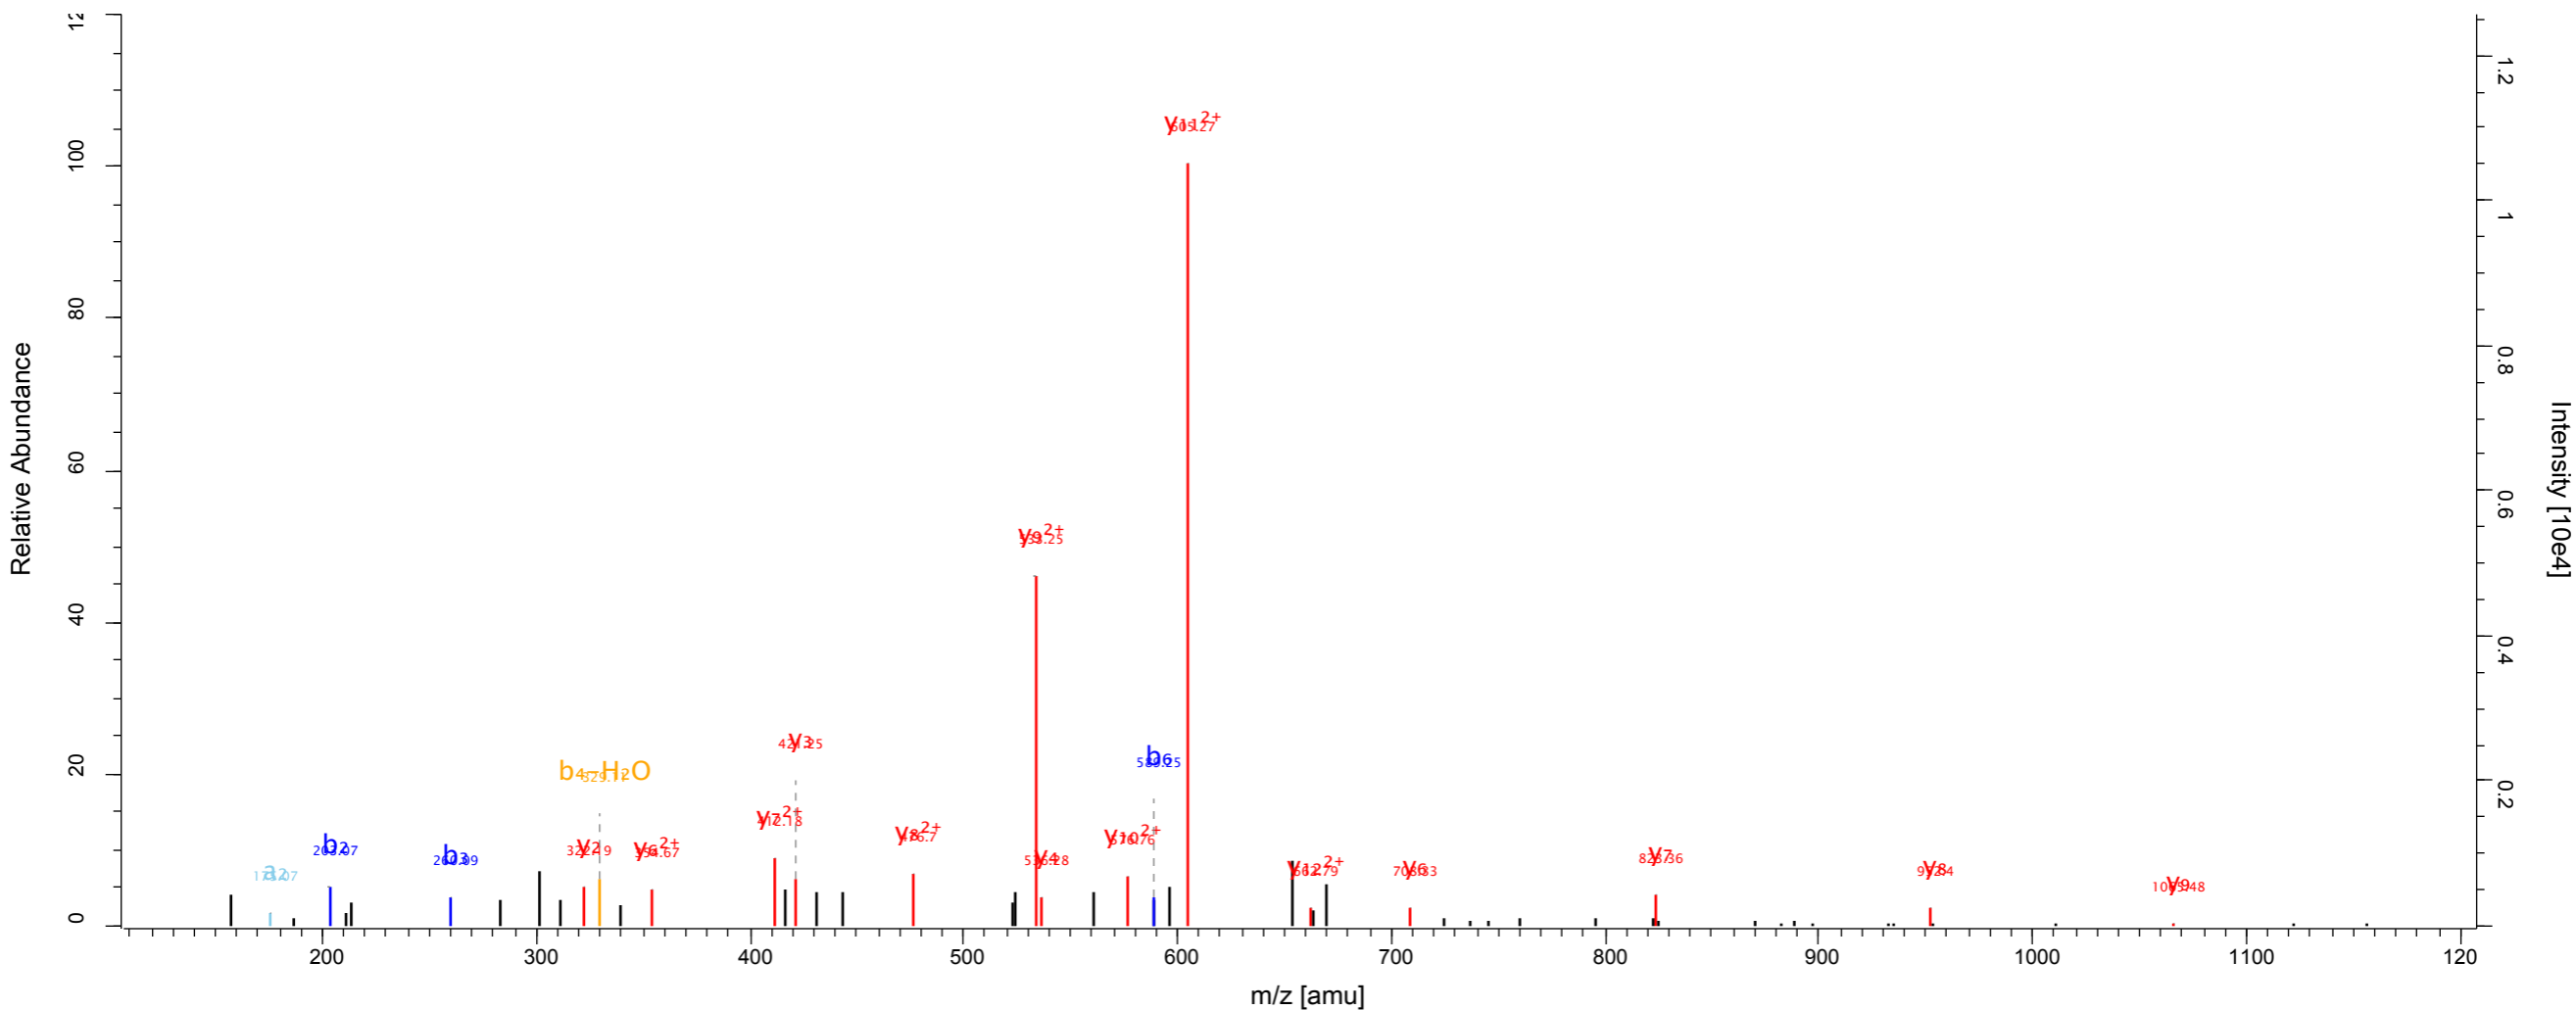

precursor information

|                   |                  |
|-------------------|------------------|
| Mass:             | 1400.58007       |
| m/z:              | 467.8672         |
| Charge:           | 2+               |
| Retention time:   | 26.6020506530762 |
| Score:            | 112.1254         |
| Mass Error (ppm): | -0.24288         |
| PEP:              | 8.7704E-05       |
| Precursor Type:   | MULTI            |

general information

|                       |             |
|-----------------------|-------------|
| Annotation:           | 10 of 12    |
| AminoAcids Coverage:  | 77 %        |
| Intensity Coverage:   | 72 %        |
| Peak Coverage:        | 25 %        |
| Protein Localisation: | 361 ... 373 |

| a ion      |              | b ion      |              |    |     |    | y ion        |            | y <sup>2+</sup> ion |            |
|------------|--------------|------------|--------------|----|-----|----|--------------|------------|---------------------|------------|
| Δ dalton   | mass         | Δ dalton   | mass         |    | seq |    | Δ dalton     | mass       | Δ dalton            | mass       |
|            | 60.044390254 |            | 88.039304876 | 1  | S   | 12 |              |            |                     |            |
| +0.1805588 | 175.07133329 | +0.0542965 | 203.06624791 | 2  | D   | 11 | 1324.5639316 |            | 662.78560404        | -0.1129966 |
|            | 232.09279701 | -0.0248454 | 260.08771163 | 3  | G   | 10 | 1209.5369886 |            | 605.27213253        | +0.0619129 |
|            | 319.12482542 |            | 347.11974004 | 4  | S   | 9  | 1152.5155249 |            | 576.76140067        | +0.099134  |
|            | 432.2088894  |            | 460.20380402 | 5  | I   | 8  | 1065.4834965 | +0.0904782 | 533.24538646        | +0.0771843 |
|            | 561.2514825  | +0.1223163 | 589.24639712 | 6  | E   | 7  | 952.39943247 | -0.0811341 | 476.70335447        | +0.0251917 |
|            | 676.27842553 |            | 704.27334015 | 7  | D   | 6  | 823.35683938 | +0.095126  | 412.18205792        | -0.1364341 |
|            | 733.29988925 |            | 761.29480387 | 8  | G   | 5  | 708.32989635 | -0.0083021 | 354.66858641        | -0.357063  |
|            | 848.32683228 |            | 876.32174691 | 9  | D   | 4  | 651.30843262 |            | 651.30843262        |            |
|            | 963.35377532 |            | 991.34868994 | 10 | D   | 3  | 536.28148959 | +0.0498703 | 536.28148959        |            |
|            | 1062.4221892 |            | 1090.4171039 | 11 | V   | 2  | 421.25454656 | +0.122254  | 421.25454656        |            |
|            | 1199.4811011 |            | 1227.4760157 | 12 | H   | 1  | 322.18613264 | +0.021509  | 322.18613264        |            |
|            |              |            |              | 13 | R   | 0  | 185.12722078 |            | 185.12722078        |            |

Scan number 19813 Raw file 20091031\_Orbi6\_MaHe\_SA\_ADH\_exp3\_Laminin\_Re\_Gel09  
 Method ITMS; CID Genenames SNX21

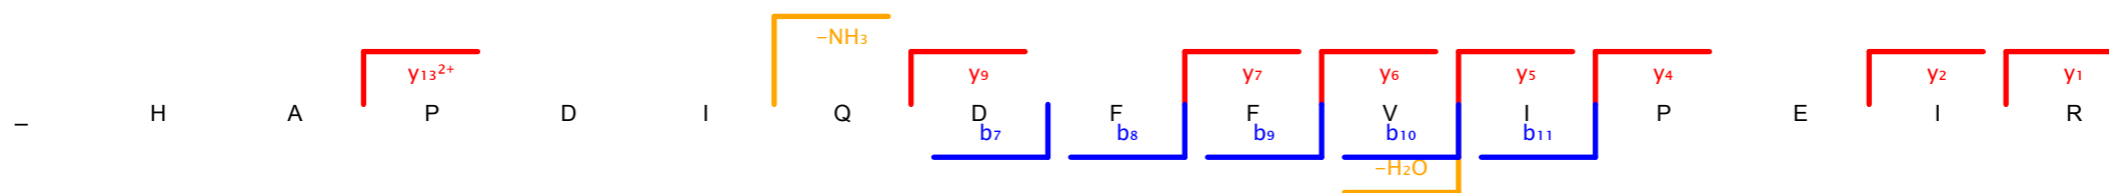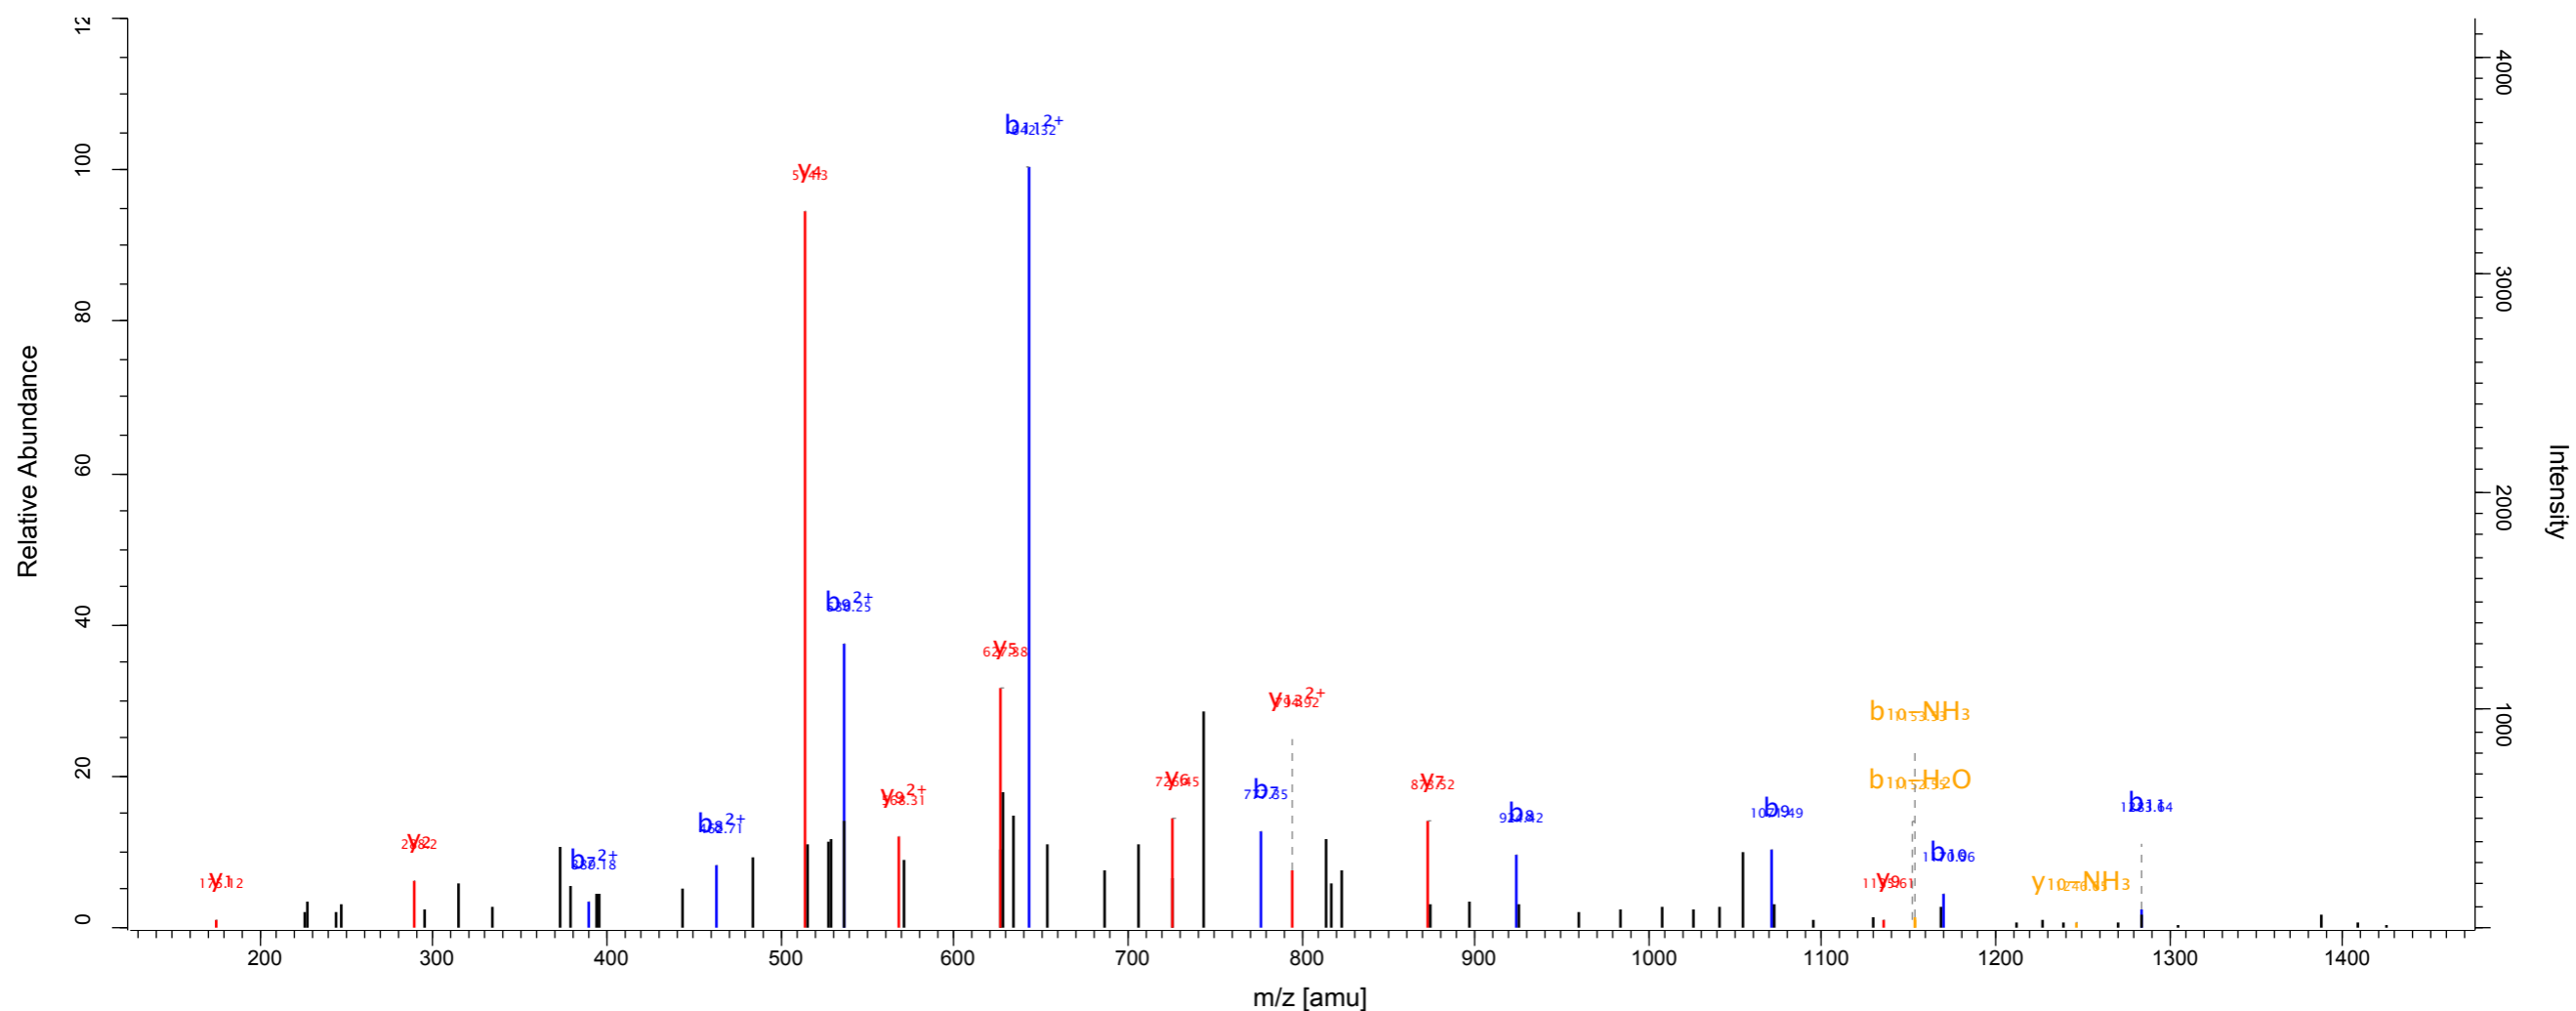

precursor information

|                   |                  |
|-------------------|------------------|
| Mass:             | 1705.02506       |
| m/z:              | 500.64026        |
| Charge:           | 2+               |
| Potentia time:    | 112.700281021287 |
| Score:            | 106.1200         |
| Mass Error [ppm]: | 0.12672          |
| PEP:              | 0.00011022       |
| Precursor Type:   | MULTI            |

general information

|                       |             |
|-----------------------|-------------|
| Annotation:           | 10 of 15    |
| AminoAcids Coverage:  | 67%         |
| Intensity Coverage:   | 56%         |
| Peak Coverage:        | 20%         |
| Protein Localisation: | 231 ... 245 |

| b <sup>2+</sup> ion |              | b ion      |              |    |     |    | y ion        |            | y <sup>2+</sup> ion |            |
|---------------------|--------------|------------|--------------|----|-----|----|--------------|------------|---------------------|------------|
| Δ dalton            | mass         | Δ dalton   | mass         |    | seq |    | Δ dalton     | mass       | Δ dalton            | mass       |
|                     | 138.06618833 |            | 138.06618833 | 1  | H   | 14 |              |            |                     |            |
|                     | 209.10330212 |            | 209.10330212 | 2  | A   | 13 | 1659.874084  |            | 1659.874084         |            |
|                     | 306.15606597 |            | 306.15606597 | 3  | P   | 12 | 1588.8369702 |            | 794.92212336        | +0.0508991 |
|                     | 421.183009   |            | 421.183009   | 4  | D   | 11 | 1491.7842064 |            | 1491.7842064        |            |
|                     | 534.26707298 |            | 534.26707298 | 5  | I   | 10 | 1376.7572634 |            | 1376.7572634        |            |
|                     | 662.32565049 |            | 662.32565049 | 6  | Q   | 9  | 1263.6731994 |            | 1263.6731994        |            |
| +0.0429654          | 389.179935   | -0.066888  | 777.35259352 | 7  | D   | 8  | 1135.6146219 | -0.1273172 | 568.31094917        | -0.2131098 |
| -0.0386048          | 462.71414195 | +0.0235726 | 924.42100744 | 8  | F   | 7  | 1020.5876788 |            | 1020.5876788        |            |
| -0.1051604          | 536.24834891 | +0.0971265 | 1071.4894214 | 9  | F   | 6  | 873.51926492 | -0.0585716 | 873.51926492        |            |
|                     | 1170.5578353 | -0.0489241 | 1170.5578353 | 10 | V   | 5  | 726.45085101 | -0.0326992 | 726.45085101        |            |
| +0.0496187          | 642.32458786 | -0.1199266 | 1283.6418993 | 11 | I   | 4  | 627.38243709 | -0.0604766 | 627.38243709        |            |
|                     | 1380.6946631 |            | 1380.6946631 | 12 | P   | 3  | 514.29837311 | -0.065524  | 514.29837311        |            |
|                     | 1509.7372562 |            | 1509.7372562 | 13 | E   | 2  | 417.24560926 |            | 417.24560926        |            |
|                     | 1622.8213202 |            | 1622.8213202 | 14 | I   | 1  | 288.20301616 | +0.0045034 | 288.20301616        |            |
|                     |              |            |              | 15 | R   | 0  | 175.11895218 | +0.2141167 | 175.11895218        |            |

Scan number 6513 Raw file 20091031\_Orbi6\_MaHe\_SA\_ADH\_exp3\_Laminin\_Re\_Gel13  
 Method ITMS; CID Genenames PRMT7

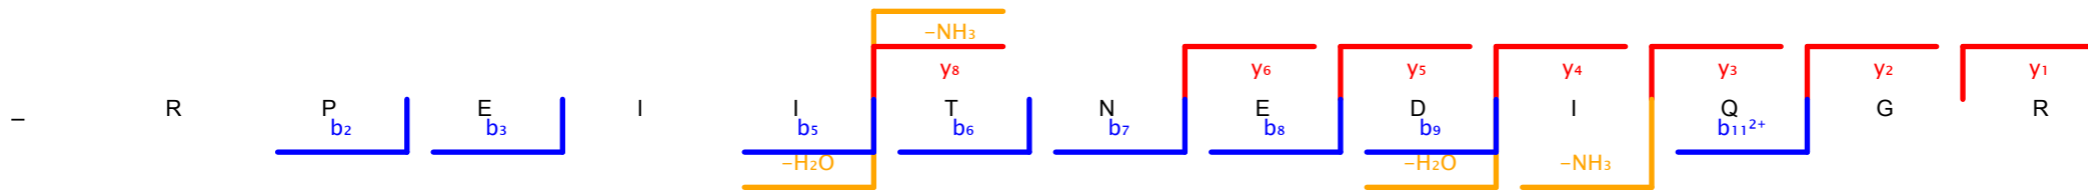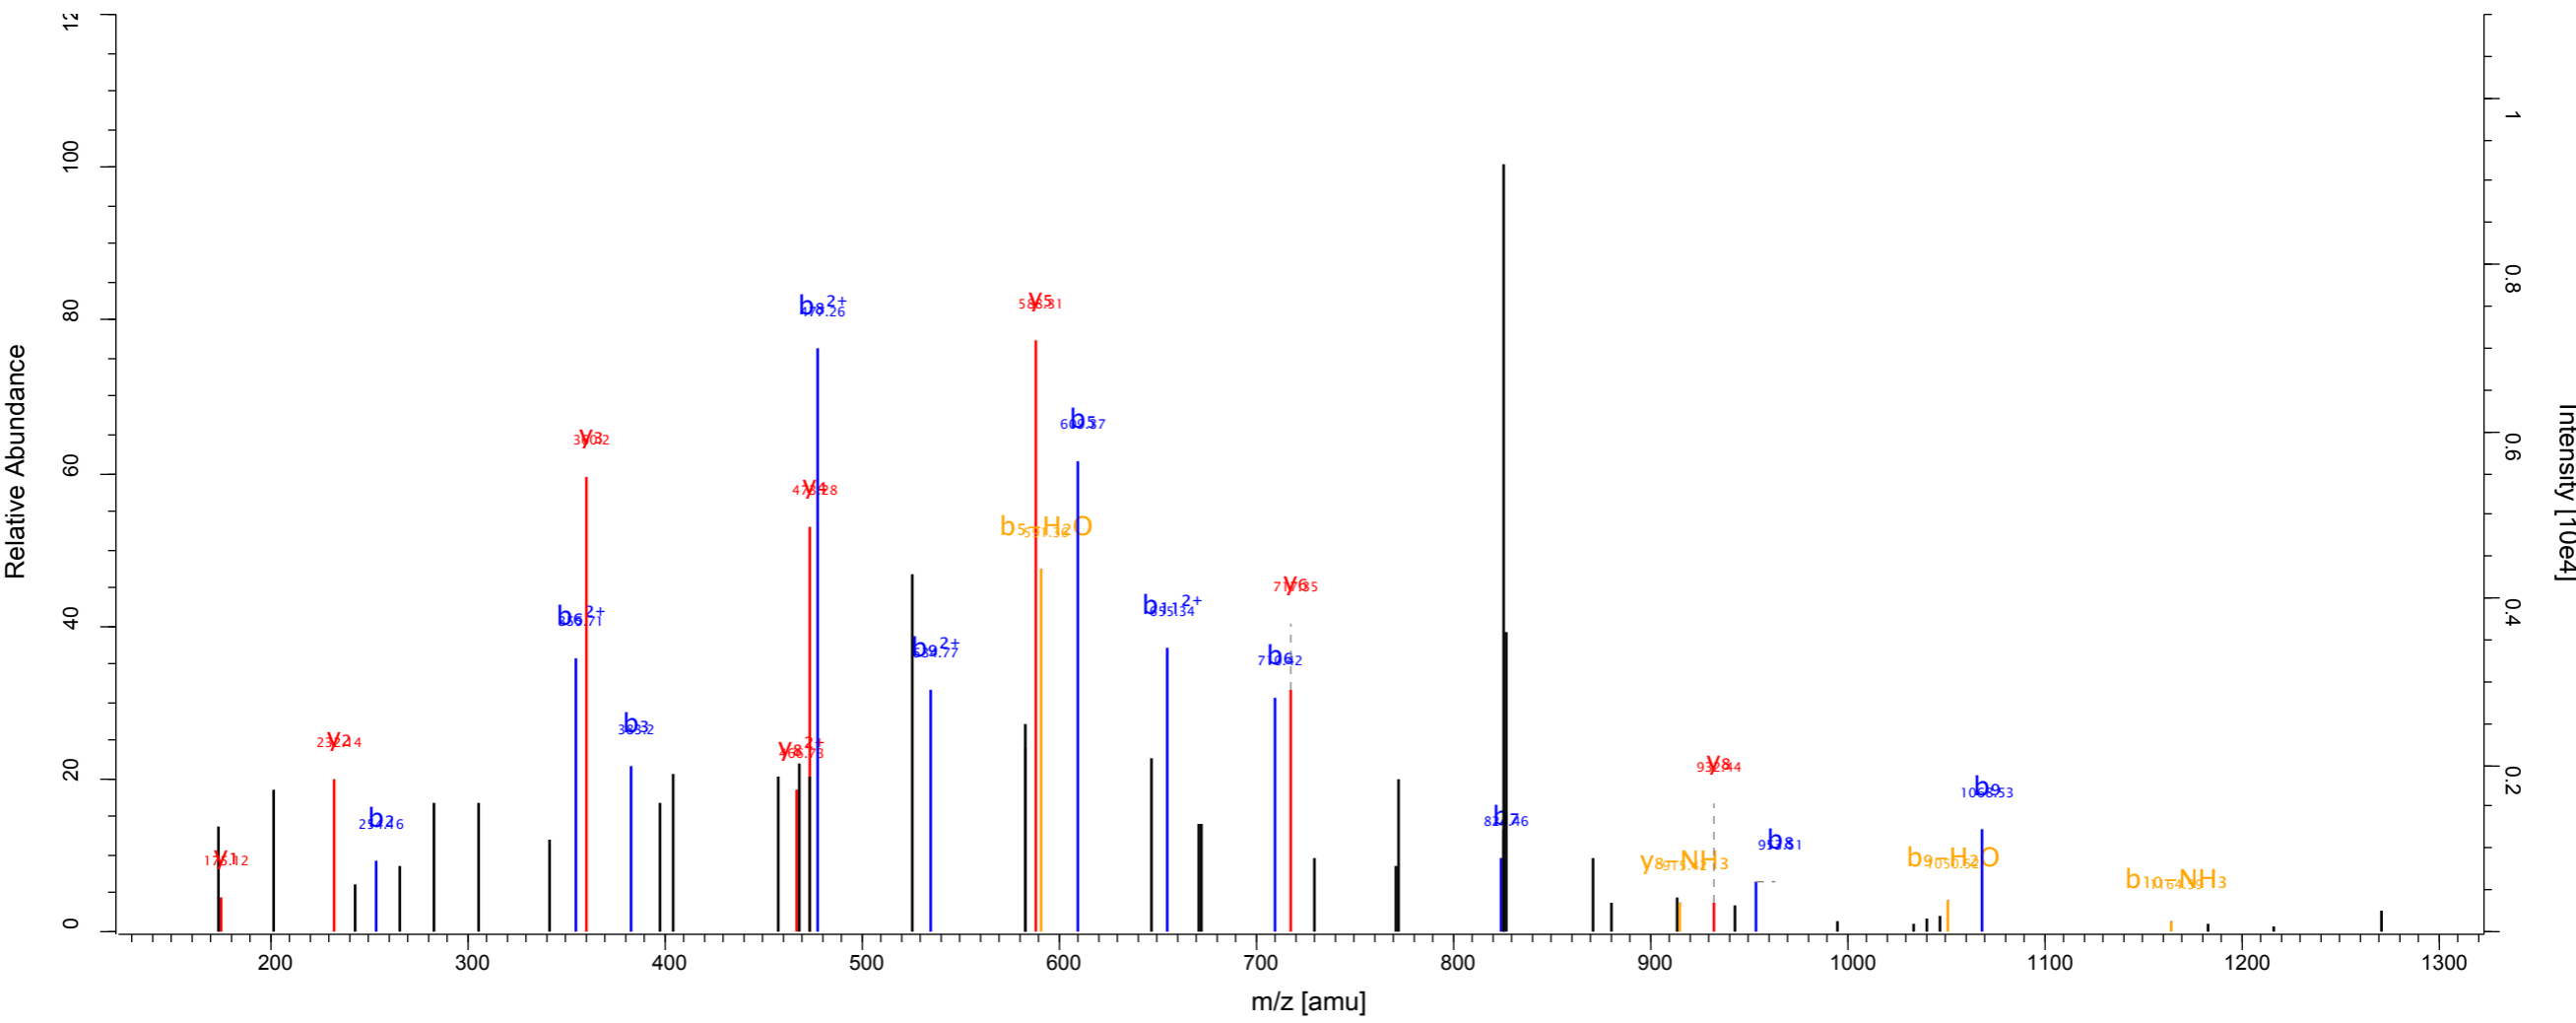

precursor information

|                   |                  |
|-------------------|------------------|
| Mass:             | 1520.80072       |
| m/z:              | 514.27418        |
| Charge:           | 2+               |
| Retention time:   | 11.5124112548828 |
| Score:            | 144.4722         |
| Mass Error (ppm): | 0.12421          |
| PEP:              | 3.6732E-05       |
| Precursor Type:   | ISO              |

general information

|                       |             |
|-----------------------|-------------|
| Annotation:           | 11 of 12    |
| AminoAcids Coverage:  | 85 %        |
| Intensity Coverage:   | 54 %        |
| Peak Coverage:        | 40 %        |
| Protein Localisation: | 458 ... 470 |

| b <sup>2+</sup> ion |              | b ion      |              |    |     |    | y ion        |            | y <sup>2+</sup> ion |            |
|---------------------|--------------|------------|--------------|----|-----|----|--------------|------------|---------------------|------------|
| Δ dalton            | mass         | Δ dalton   | mass         |    | seq |    | Δ dalton     | mass       | Δ dalton            | mass       |
|                     | 157.10838749 |            | 157.10838749 | 1  | R   | 12 |              |            |                     |            |
|                     | 254.16115135 | -0.0239138 | 254.16115135 | 2  | P   | 11 | 1384.7066844 |            | 1384.7066844        |            |
|                     | 383.20374444 | +0.0681672 | 383.20374444 | 3  | E   | 10 | 1287.6539205 |            | 1287.6539205        |            |
|                     | 496.28780842 |            | 496.28780842 | 4  | I   | 9  | 1158.6113274 |            | 1158.6113274        |            |
|                     | 609.3718724  | -0.150681  | 609.3718724  | 5  | I   | 8  | 1045.5272634 |            | 1045.5272634        |            |
| +0.0230365          | 355.71341367 | -0.072566  | 710.41955088 | 6  | T   | 7  | 932.44319945 | +0.4493787 | 466.72523796        | +0.0165223 |
|                     | 824.46247833 | -0.1594388 | 824.46247833 | 7  | N   | 6  | 831.39552097 |            | 831.39552097        |            |
| -0.0460909          | 477.25617394 | -0.2373102 | 953.50507142 | 8  | E   | 5  | 717.35259352 | +0.1595525 | 717.35259352        |            |
| +0.0462725          | 534.76964546 | +0.0517258 | 1068.5320145 | 9  | D   | 4  | 588.31000043 | -0.0289946 | 588.31000043        |            |
|                     | 1181.6160784 |            | 1181.6160784 | 10 | I   | 3  | 473.2830574  | -0.041053  | 473.2830574         |            |
| -0.0022211          | 655.34096621 |            | 1309.6746559 | 11 | Q   | 2  | 360.19899342 | -0.0174749 | 360.19899342        |            |
|                     | 1366.6961197 |            | 1366.6961197 | 12 | G   | 1  | 232.1404159  | -0.0266464 | 232.1404159         |            |
|                     |              |            |              | 13 | R   | 0  | 175.11895218 | +0.0008446 | 175.11895218        |            |

Scan number 1333 Raw file 20091031\_Orbi6\_MaHe\_SA\_ADH\_exp3\_Laminin\_Re\_Gel14  
 Method ITMS; CID Genenames UIMC1

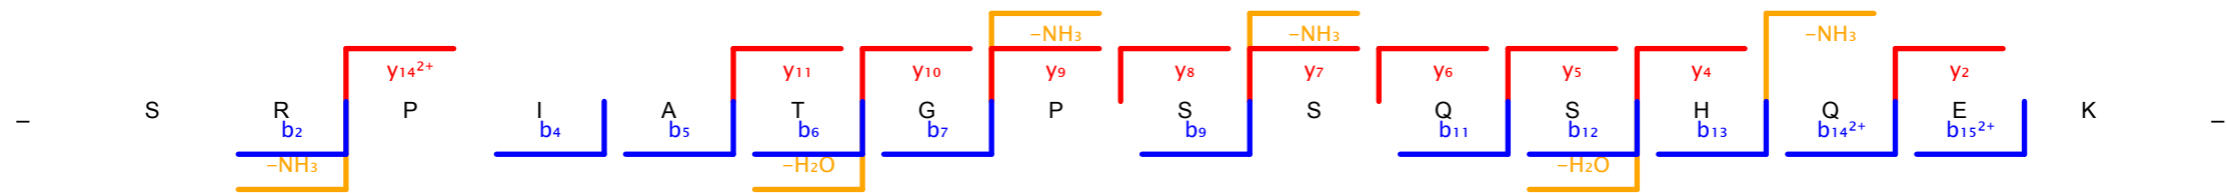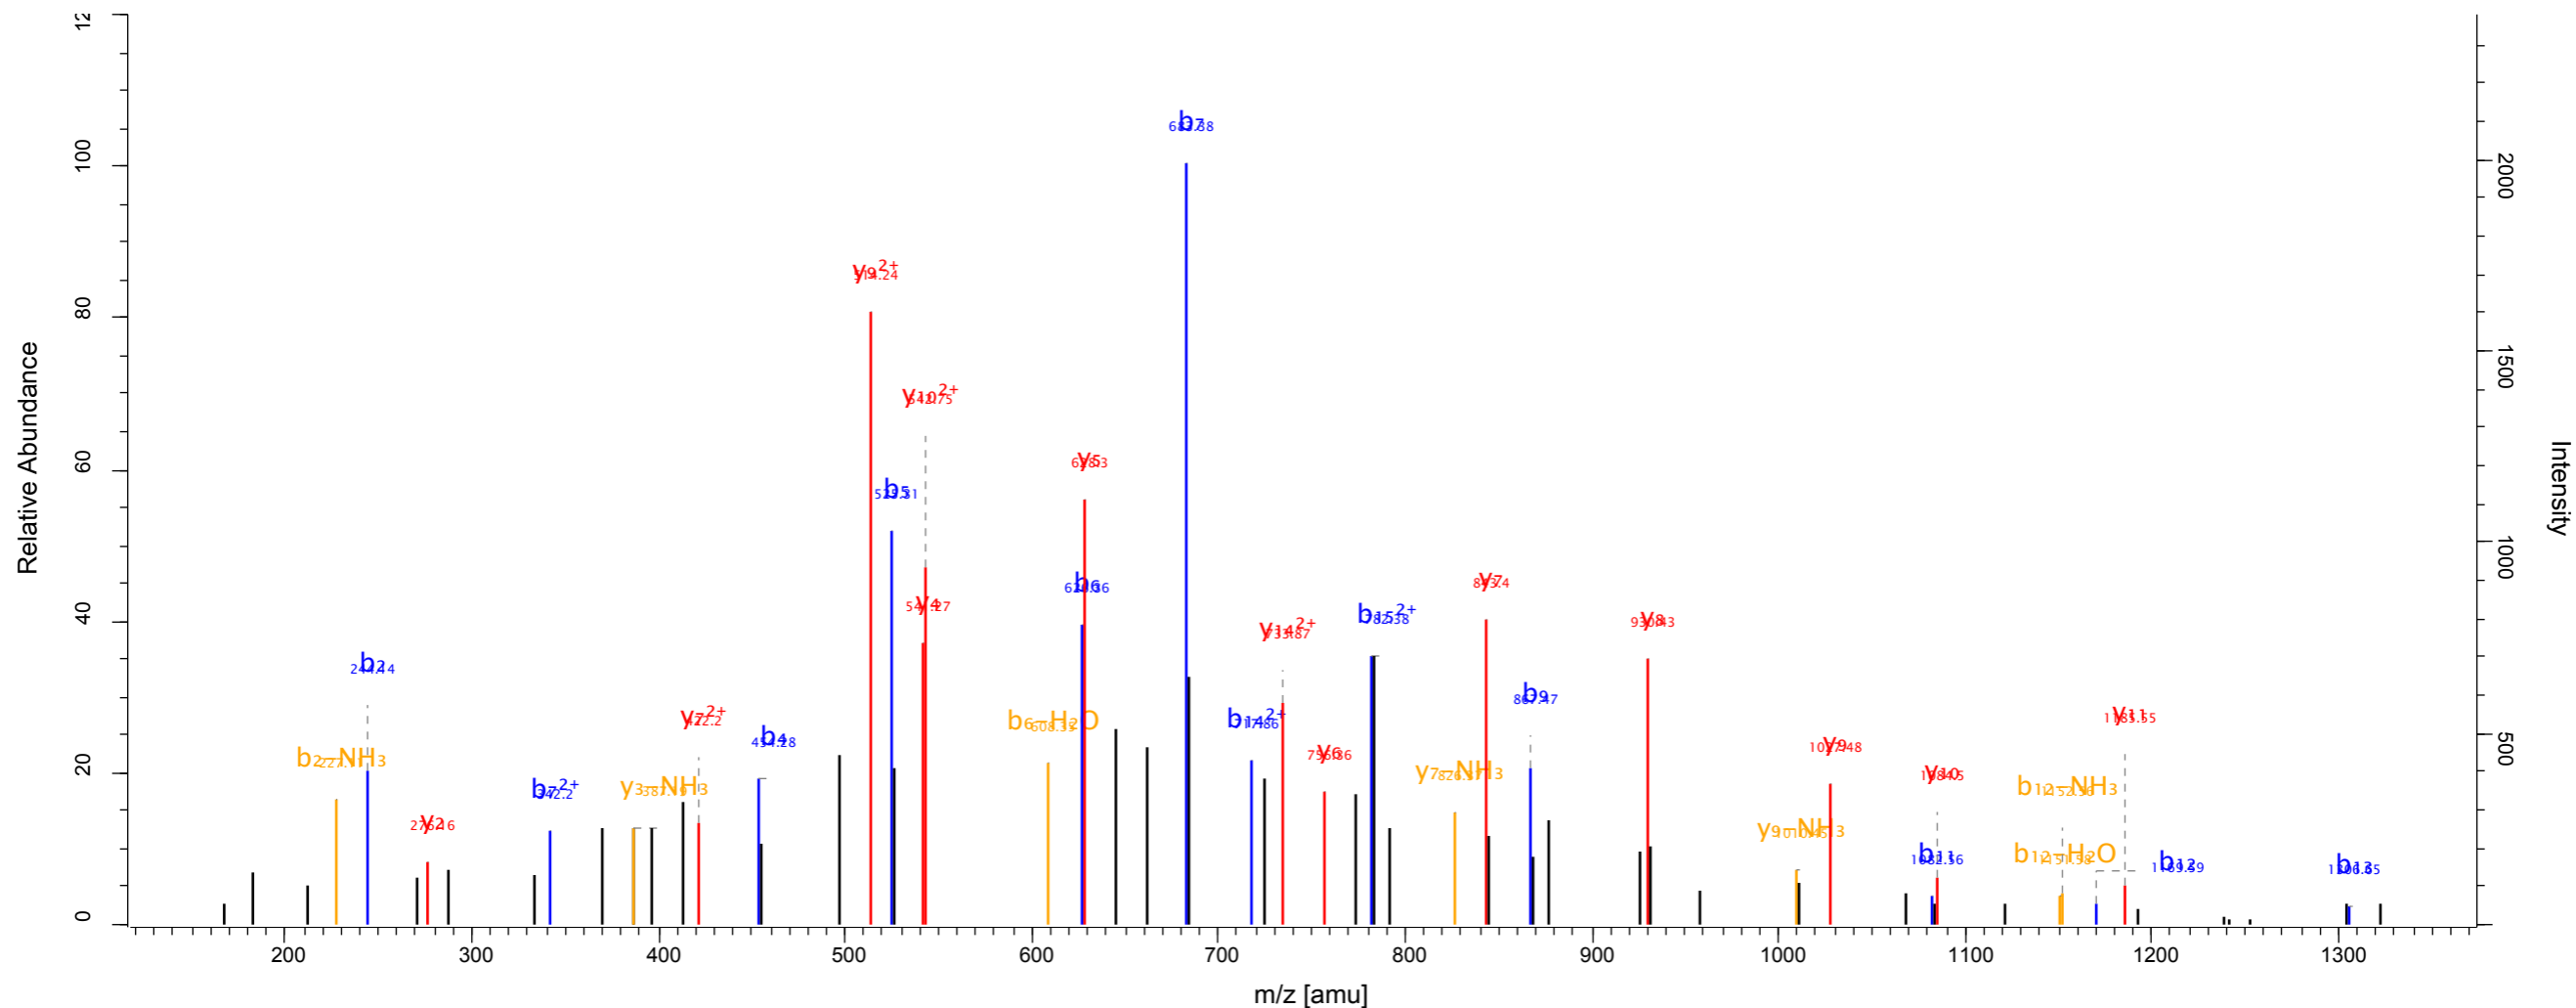

precursor information

|                   |                  |
|-------------------|------------------|
| Mass:             | 1708.84026       |
| m/z:              | 570.62272        |
| Charge:           | 2+               |
| Retention time:   | 18.8672552466707 |
| Score:            | 100.8578         |
| Mass Error [ppm]: | 0.058061         |
| DEP:              | 1.812524         |
| Precursor Type:   | MULTI            |

general information

|                       |             |
|-----------------------|-------------|
| Annotation:           | 14 of 16    |
| AminoAcids Coverage:  | 88%         |
| Intensity Coverage:   | 67%         |
| Peak Coverage:        | 47%         |
| Protein Localisation: | 131 ... 146 |

| b <sup>2+</sup> ion |              | b ion      |              |    |     |    | y ion        |            | y <sup>2+</sup> ion |            |
|---------------------|--------------|------------|--------------|----|-----|----|--------------|------------|---------------------|------------|
| Δ dalton            | mass         | Δ dalton   | mass         |    | seq |    | Δ dalton     | mass       | Δ dalton            | mass       |
|                     | 88.039304876 |            | 88.039304876 | 1  | S   | 15 |              |            |                     |            |
|                     | 244.1404159  | -0.0112655 | 244.1404159  | 2  | R   | 14 | 1622.8245081 |            | 1622.8245081        |            |
|                     | 341.19317976 |            | 341.19317976 | 3  | P   | 13 | 1466.7233971 |            | 733.86533676        | +0.0176588 |
|                     | 454.27724374 | -0.2038184 | 454.27724374 | 4  | I   | 12 | 1369.6706332 |            | 1369.6706332        |            |
|                     | 525.31435752 | +0.000828  | 525.31435752 | 5  | A   | 11 | 1256.5865692 |            | 1256.5865692        |            |
|                     | 626.362036   | -0.1118529 | 626.362036   | 6  | T   | 10 | 1185.5494554 | -0.0027025 | 1185.5494554        |            |
| +0.1487892          | 342.19538809 | -0.0807653 | 683.38349972 | 7  | G   | 9  | 1084.501777  | +0.2526176 | 542.75452671        | +0.0862326 |
|                     | 780.43626357 |            | 780.43626357 | 8  | P   | 8  | 1027.4803132 | +0.0467864 | 514.24379485        | +0.1121622 |
|                     | 867.46829198 | +0.0843814 | 867.46829198 | 9  | S   | 7  | 930.42754938 | -0.0332012 | 930.42754938        |            |
|                     | 954.50032039 |            | 954.50032039 | 10 | S   | 6  | 843.39552097 | -0.043226  | 422.20139872        | +0.0194875 |
|                     | 1082.5588979 | +0.0756236 | 1082.5588979 | 11 | Q   | 5  | 756.36349256 | -0.1687904 | 756.36349256        |            |
|                     | 1169.5909263 | +0.0472573 | 1169.5909263 | 12 | S   | 4  | 628.30491505 | -0.0240923 | 628.30491505        |            |
|                     | 1306.6498382 | -0.2933929 | 1306.6498382 | 13 | H   | 3  | 541.27288664 | -0.1812118 | 541.27288664        |            |
| +0.0428497          | 717.85784608 |            | 1434.7084157 | 14 | Q   | 2  | 404.21397478 |            | 404.21397478        |            |
| -0.01519            | 782.37914263 |            | 1563.7510088 | 15 | E   | 1  | 276.15539727 | +0.1051618 | 276.15539727        |            |
|                     |              |            |              | 16 | K   | 0  | 147.11280417 |            | 147.11280417        |            |

Scan number 1360 Raw file 20091031\_Orbi6\_MaHe\_SA\_ADH\_exp3\_Laminin\_Re\_Gel14  
 Method ITMS; CID Genenames RNASEL;DKFZp781D08126

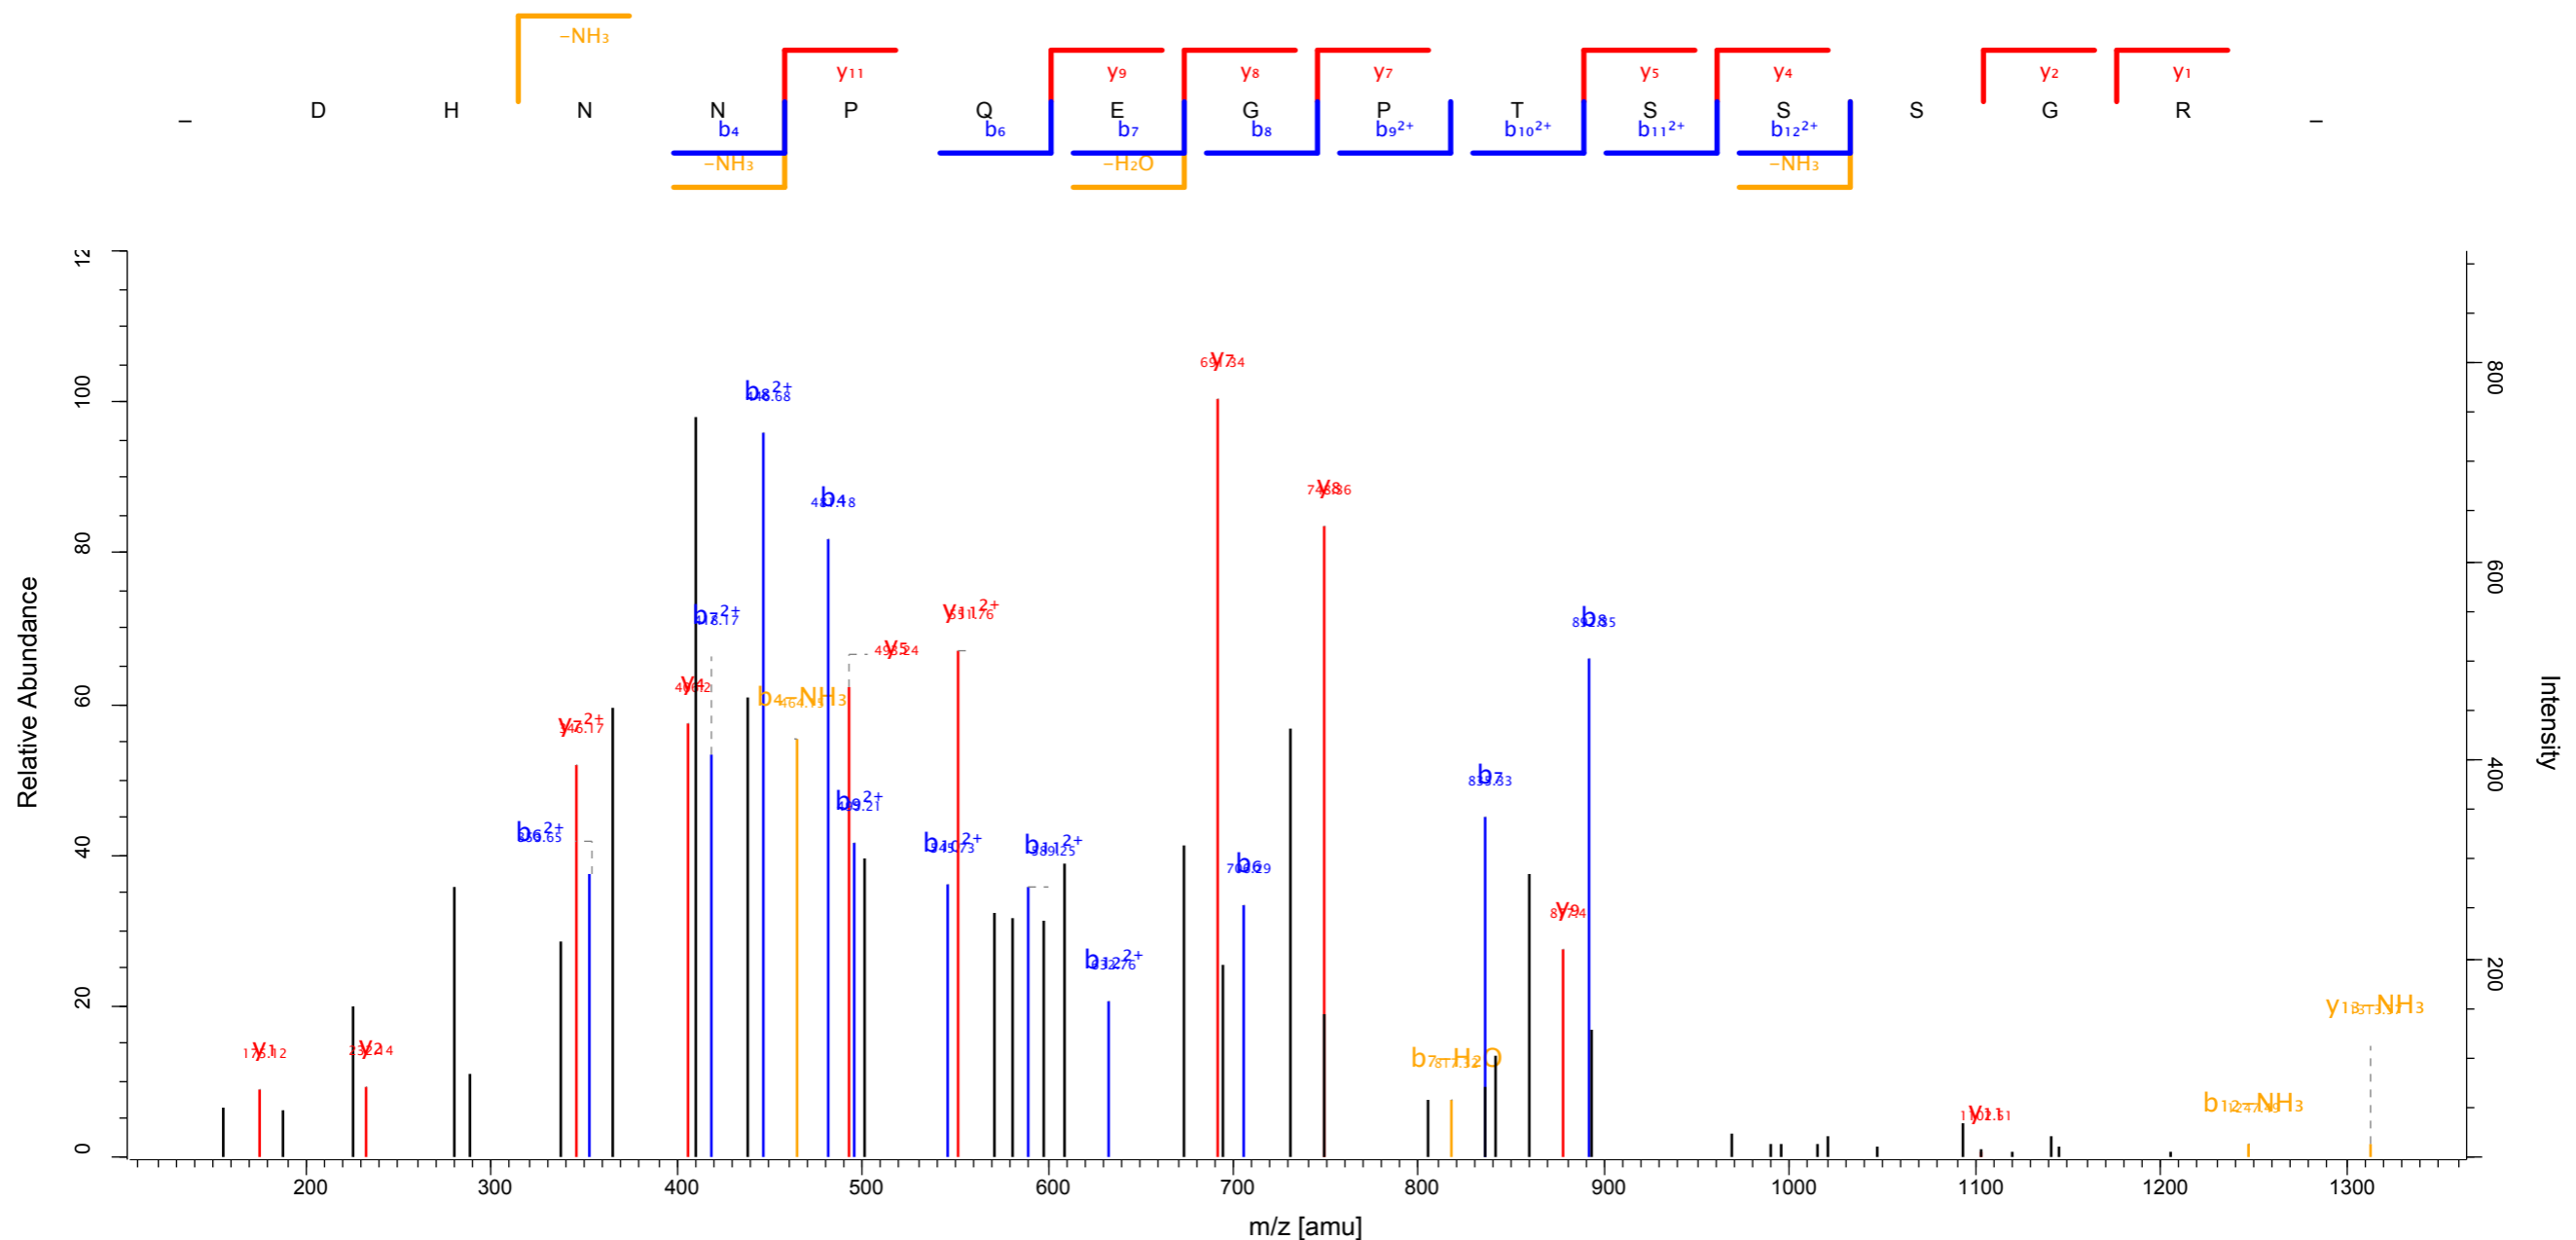

precursor information

|                   |                  |
|-------------------|------------------|
| Mass:             | 1581.67710       |
| m/z:              | 528.22201        |
| Charge:           | 2+               |
| Potentiation:     | 10.0176258087158 |
| Score:            | 120.2682         |
| Mass Error [ppm]: | 0.26467          |
| PEP:              | 0.00020601       |
| Precursor Type:   | ISO              |

| b <sup>2+</sup> ion |              | b ion      |              |    |     |    | y ion        |            | y <sup>2+</sup> ion |            |
|---------------------|--------------|------------|--------------|----|-----|----|--------------|------------|---------------------|------------|
| Δ dalton            | mass         | Δ dalton   | mass         |    | seq |    | Δ dalton     | mass       | Δ dalton            | mass       |
|                     | 116.0342195  |            | 116.0342195  | 1  | D   | 14 |              |            |                     |            |
|                     | 253.09313136 |            | 253.09313136 | 2  | H   | 13 | 1467.6571084 |            | 1467.6571084        |            |
|                     | 367.13605881 |            | 367.13605881 | 3  | N   | 12 | 1330.5981965 |            | 1330.5981965        |            |
|                     | 481.17898626 | -0.107392  | 481.17898626 | 4  | N   | 11 | 1216.5552691 |            | 1216.5552691        |            |
|                     | 578.23175011 |            | 578.23175011 | 5  | P   | 10 | 1102.5123416 | -0.037244  | 551.75980906        | +0.1345391 |
| -0.0907576          | 353.64880204 | -0.0521074 | 706.29032762 | 6  | Q   | 9  | 1005.4595778 |            | 1005.4595778        |            |
| +0.1142642          | 418.17009859 | -0.0426375 | 835.33292072 | 7  | E   | 8  | 877.40100028 | +0.0338142 | 877.40100028        |            |
| -0.0386796          | 446.68083045 | -0.0211935 | 892.35438444 | 8  | G   | 7  | 748.35840718 | -0.0344936 | 748.35840718        |            |
| +0.4712544          | 495.20721238 |            | 989.40714829 | 9  | P   | 6  | 691.33694346 | +0.0233471 | 346.17210996        | -0.0595001 |
| -0.0334808          | 545.73105162 |            | 1090.4548268 | 10 | T   | 5  | 594.28417961 |            | 594.28417961        |            |
| +0.068669           | 589.24706582 |            | 1177.4868552 | 11 | S   | 4  | 493.23650113 | +0.0748392 | 493.23650113        |            |
| -0.1096376          | 632.76308003 |            | 1264.5188836 | 12 | S   | 3  | 406.20447272 | -0.0147144 | 406.20447272        |            |
|                     | 1351.550912  |            | 1351.550912  | 13 | S   | 2  | 319.17244431 |            | 319.17244431        |            |
|                     | 1408.5723757 |            | 1408.5723757 | 14 | G   | 1  | 232.1404159  | +0.0912735 | 232.1404159         |            |
|                     |              |            |              | 15 | R   | 0  | 175.11895218 | +0.009771  | 175.11895218        |            |

general information

|                       |          |
|-----------------------|----------|
| Annotation:           | 12 of 15 |
| AminoAcids Coverage:  | 80 %     |
| Intensity Coverage:   | 50 %     |
| Peak Coverage:        | 42 %     |
| Protein Localisation: | 5 ... 19 |



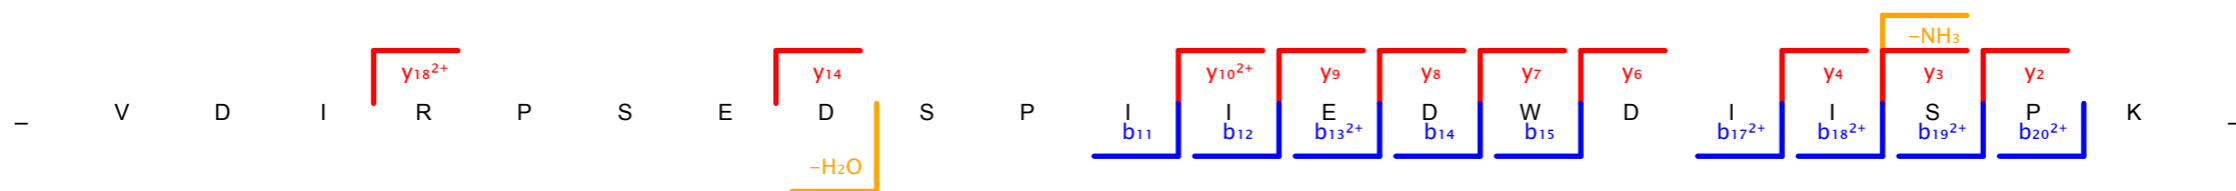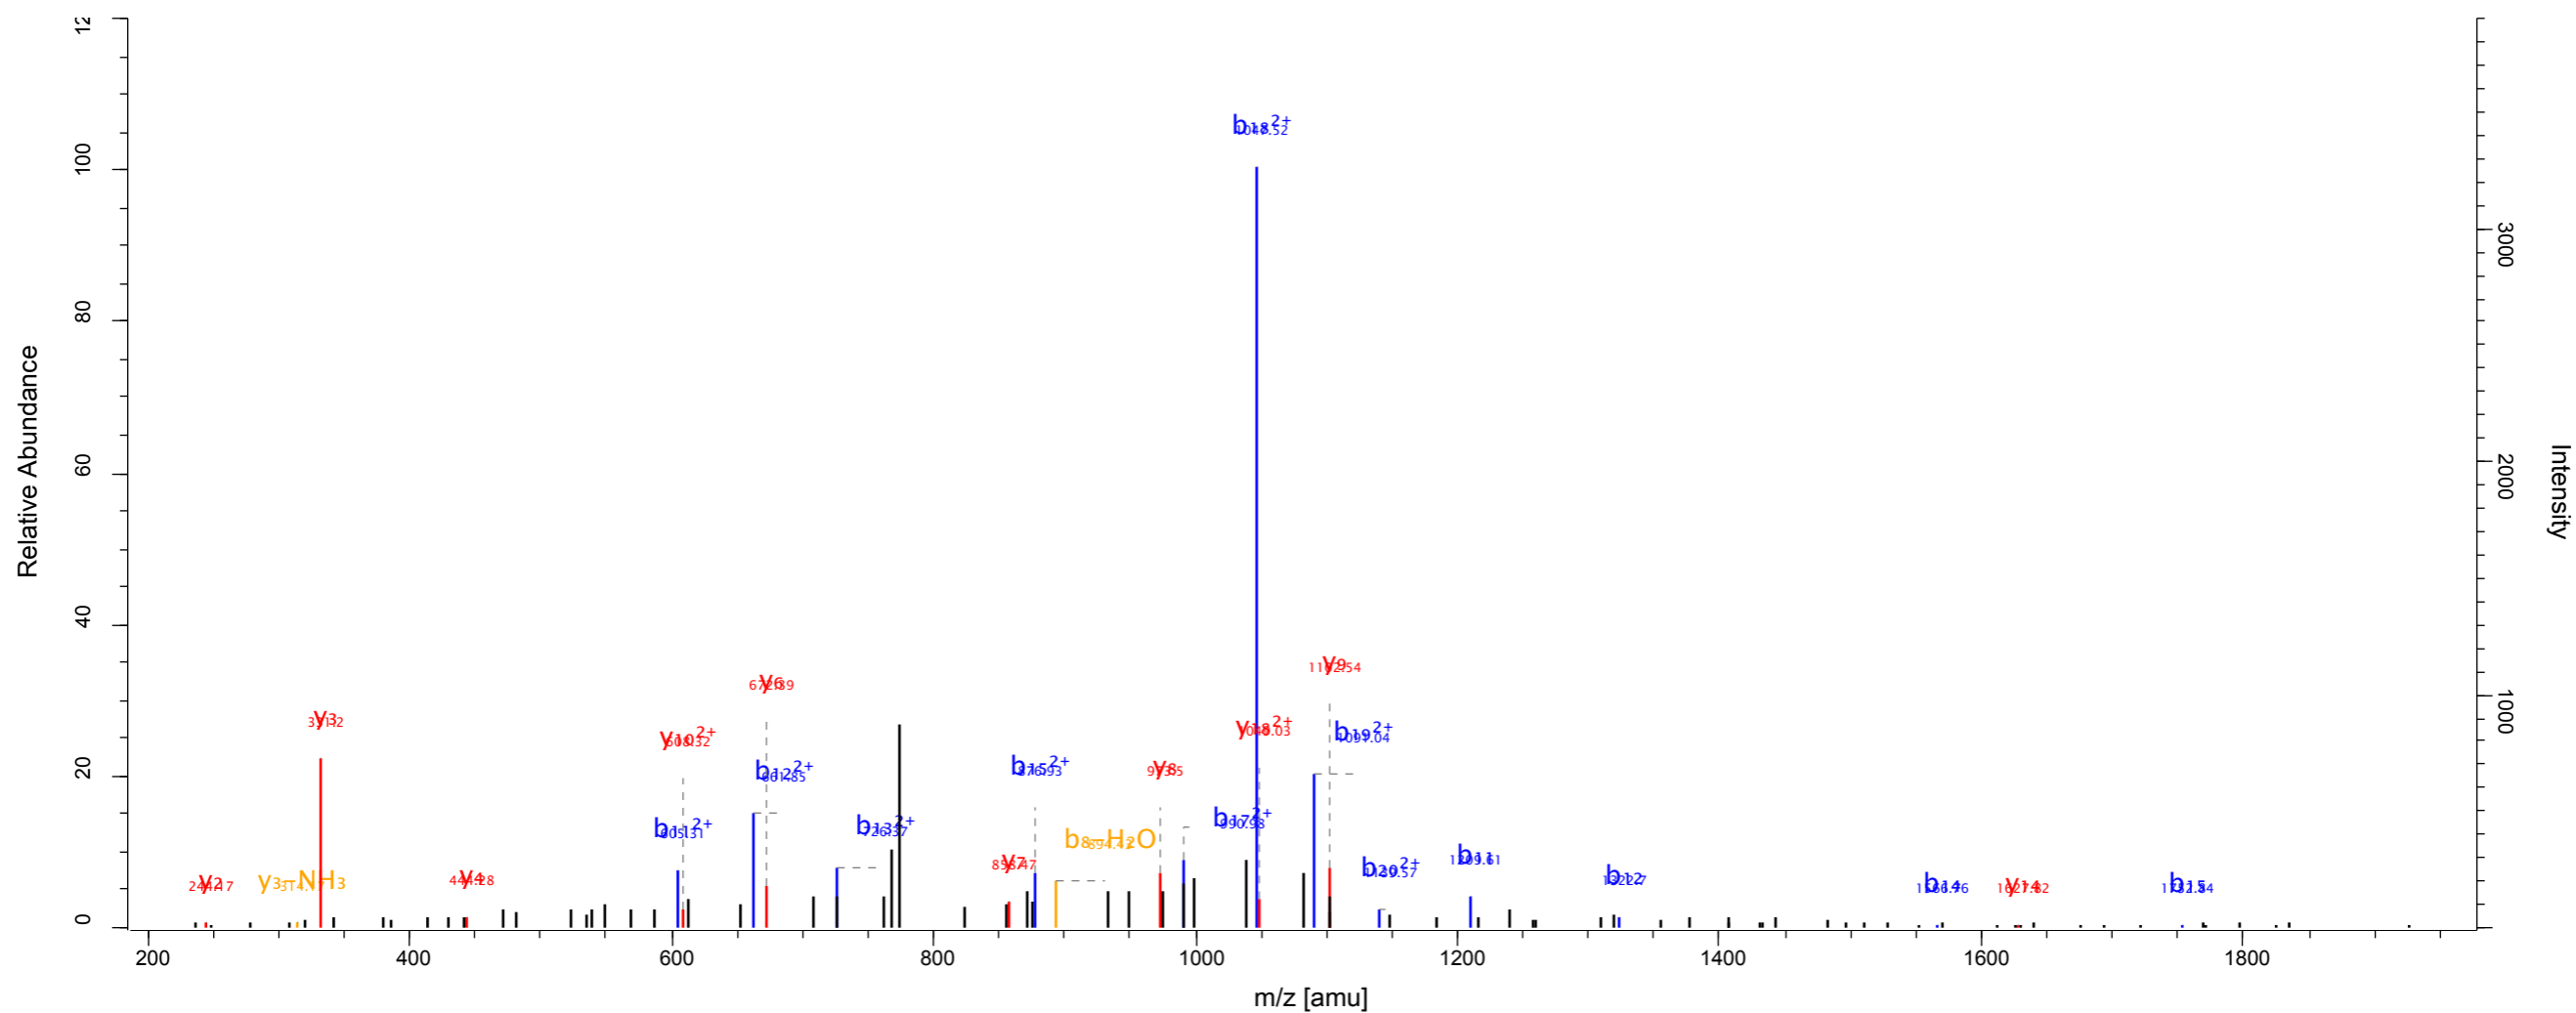

precursor information

|                   |                  |
|-------------------|------------------|
| Mass:             | 2422.222         |
| m/z:              | 808.74704        |
| Charge:           | 2                |
| Retention time:   | 107.712172461014 |
| Score:            | 105.8856         |
| Mass Error (ppm): | -0.0005252       |
| DEP:              | 0.00026741       |
| Precursor Type:   | ISO              |

| b <sup>2+</sup> ion |              | b ion      |              |    |     |    | y ion        |            | y <sup>2+</sup> ion |            |
|---------------------|--------------|------------|--------------|----|-----|----|--------------|------------|---------------------|------------|
| Δ dalton            | mass         | Δ dalton   | mass         |    | seq |    | Δ dalton     | mass       | Δ dalton            | mass       |
|                     | 100.07569038 |            | 100.07569038 | 1  | V   | 20 |              |            |                     |            |
|                     | 215.10263341 |            | 215.10263341 | 2  | D   | 19 | 2325.1608832 |            | 2325.1608832        |            |
|                     | 328.1866974  |            | 328.1866974  | 3  | I   | 18 | 2210.1339401 |            | 2210.1339401        |            |
|                     | 484.28780842 |            | 484.28780842 | 4  | R   | 17 | 2097.0498761 |            | 1049.0285763        | -0.0365109 |
|                     | 581.34057228 |            | 581.34057228 | 5  | P   | 16 | 1940.9487651 |            | 1940.9487651        |            |
|                     | 668.37260069 |            | 668.37260069 | 6  | S   | 15 | 1843.8960013 |            | 1843.8960013        |            |
|                     | 797.41519378 |            | 797.41519378 | 7  | E   | 14 | 1756.8639729 |            | 1756.8639729        |            |
|                     | 912.44213681 |            | 912.44213681 | 8  | D   | 13 | 1627.8213798 | -0.0451346 | 1627.8213798        |            |
|                     | 999.47416522 |            | 999.47416522 | 9  | S   | 12 | 1512.7944367 |            | 1512.7944367        |            |
|                     | 1096.5269291 |            | 1096.5269291 | 10 | P   | 11 | 1425.7624083 |            | 1425.7624083        |            |
| -0.1961587          | 605.30913476 | +0.2476495 | 1209.6109931 | 11 | I   | 10 | 1328.7096445 |            | 1328.7096445        |            |
| -0.0072336          | 661.85116675 | +0.1433219 | 1322.695057  | 12 | I   | 9  | 1215.6255805 |            | 608.31642848        | +0.0227439 |
| -0.1847802          | 726.3724633  |            | 1451.7376501 | 13 | E   | 8  | 1102.5415165 | +0.060046  | 1102.5415165        |            |
|                     | 1566.7645932 | -0.1421566 | 1566.7645932 | 14 | D   | 7  | 973.49892341 | -0.3194801 | 973.49892341        |            |
| -0.168084           | 876.92559129 | +0.3896144 | 1752.8439061 | 15 | W   | 6  | 858.47198038 | -0.0367387 | 858.47198038        |            |
|                     | 1867.8708491 |            | 1867.8708491 | 16 | D   | 5  | 672.39266743 | -0.1139199 | 672.39266743        |            |
| -0.2437901          | 990.9810948  |            | 1980.9549131 | 17 | I   | 4  | 557.36572439 |            | 557.36572439        |            |
| +0.195257           | 1047.5231268 |            | 2094.0389771 | 18 | I   | 3  | 444.28166041 | -0.0892776 | 444.28166041        |            |
| +0.1070992          | 1091.039141  |            | 2181.0710055 | 19 | S   | 2  | 331.19759643 | +0.0049793 | 331.19759643        |            |
| +0.3431685          | 1139.5655229 |            | 2278.1237694 | 20 | P   | 1  | 244.16556802 | -0.0025126 | 244.16556802        |            |
|                     |              |            |              | 21 | K   | 0  | 147.11280417 |            | 147.11280417        |            |

general information

|                       |             |
|-----------------------|-------------|
| Annotation:           | 12 of 21    |
| AminoAcids Coverage:  | 57%         |
| Intensity Coverage:   | 57%         |
| Peak Coverage:        | 25%         |
| Protein Localisation: | 122 ... 142 |

Scan number 13385 Raw file 20091031\_Orbi6\_MaHe\_SA\_ADH\_exp3\_Laminin\_Re\_Gel16  
 Method ITMS; CID Genenames NFATC2

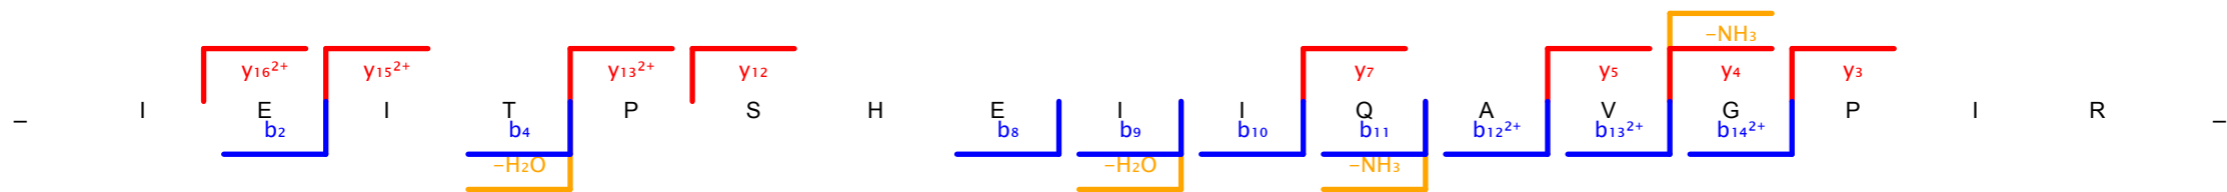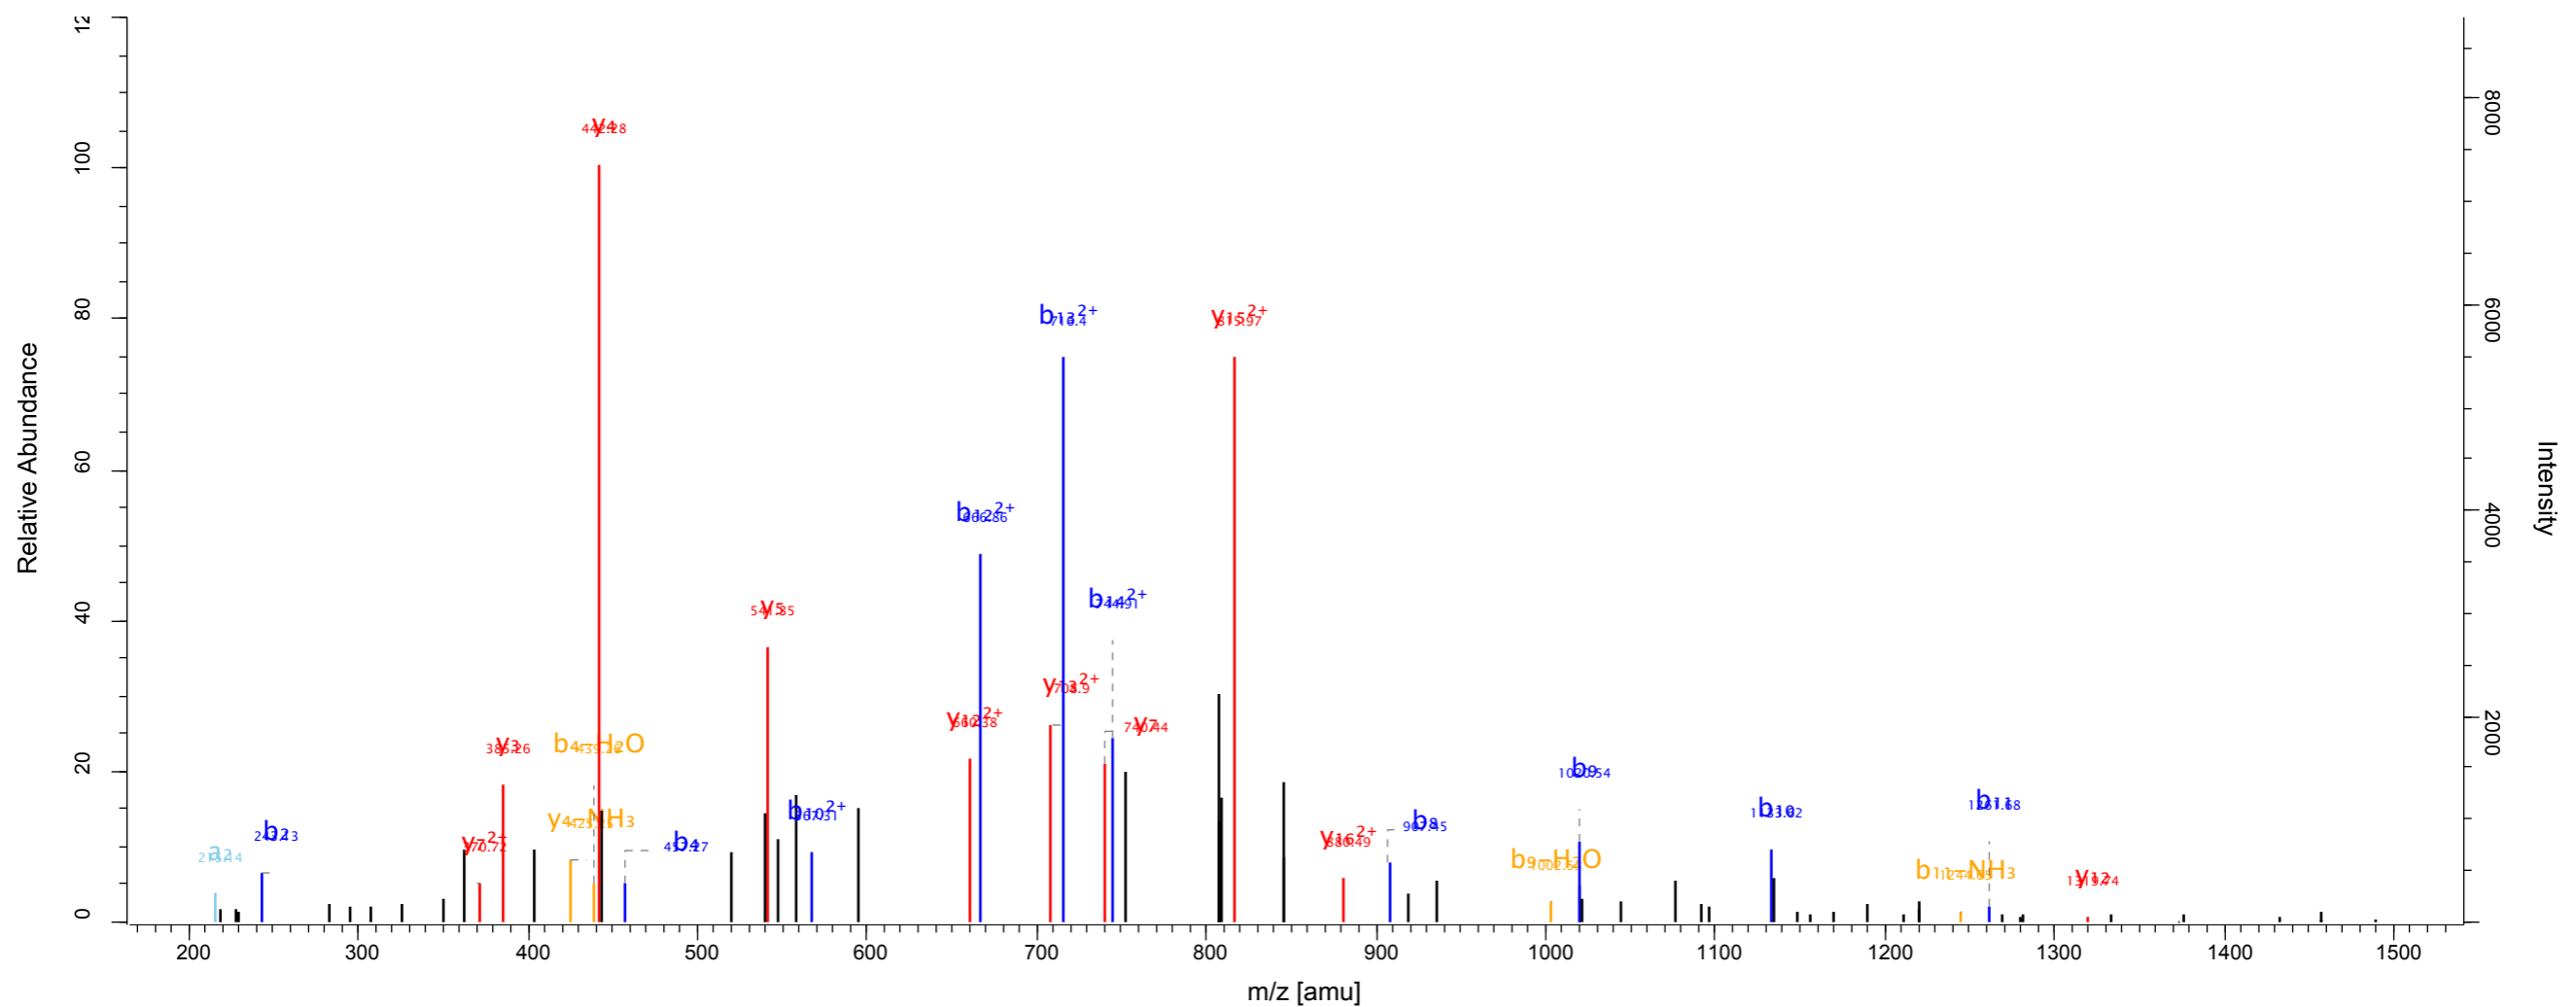

precursor information

|                   |                 |
|-------------------|-----------------|
| Mass:             | 1872.04726      |
| m/z:              | 625.02206       |
| Charge:           | 2+              |
| Retention time:   | 70.160202894042 |
| Score:            | 142.2488        |
| Mass Error [ppm]: | 0.24842         |
| PEP:              | 5.1201E-07      |
| Precursor Type:   | MULTI           |

| a ion      |            | b <sup>2+</sup> ion |            | b ion      |            |    |     |    | y ion      |            | y <sup>2+</sup> ion |            |
|------------|------------|---------------------|------------|------------|------------|----|-----|----|------------|------------|---------------------|------------|
| Δ dalton   | mass       | Δ dalton            | mass       | Δ dalton   | mass       |    | seq |    | Δ dalton   | mass       | Δ dalton            | mass       |
|            | 86.0964258 |                     | 114.09134  |            | 114.09134  | 1  | I   | 16 |            |            |                     |            |
| +0.0811196 | 215.139019 |                     | 243.133934 | -0.0057597 | 243.133934 | 2  | E   | 15 | 1759.97011 |            | 880.488693          | +0.1768953 |
|            | 328.223083 |                     | 356.217998 |            | 356.217998 | 3  | I   | 14 | 1630.92752 |            | 815.967397          | +0.1332504 |
|            | 429.270761 |                     | 457.265676 | -0.1418357 | 457.265676 | 4  | T   | 13 | 1517.84345 |            | 1517.84345          |            |
|            | 526.323525 |                     | 554.31844  |            | 554.31844  | 5  | P   | 12 | 1416.79577 |            | 708.901525          | -0.2385004 |
|            | 613.355554 |                     | 641.350468 |            | 641.350468 | 6  | S   | 11 | 1319.74301 | -0.0680835 | 660.375143          | -0.4482025 |
|            | 750.414465 |                     | 778.40938  |            | 778.40938  | 7  | H   | 10 | 1232.71098 |            | 1232.71098          |            |
|            | 879.457059 |                     | 907.451973 | +0.2850263 | 907.451973 | 8  | E   | 9  | 1095.65207 |            | 1095.65207          |            |
|            | 992.541123 |                     | 1020.53604 | -0.0619161 | 1020.53604 | 9  | I   | 8  | 966.609477 |            | 966.609477          |            |
|            | 1105.62519 | -0.2580248          | 567.313689 | -0.0461266 | 1133.6201  | 10 | I   | 7  | 853.525413 |            | 853.525413          |            |
|            | 1233.68376 |                     | 1261.67868 | +0.0323809 | 1261.67868 | 11 | Q   | 6  | 740.441349 | -0.0468177 | 370.724313          | +0.1685096 |
|            | 1304.72088 | -0.0624012          | 666.861534 |            | 1332.71579 | 12 | A   | 5  | 612.382771 |            | 612.382771          |            |
|            | 1403.78929 | +0.0128889          | 716.395741 |            | 1431.78421 | 13 | V   | 4  | 541.345658 | -0.0305331 | 541.345658          |            |
|            | 1460.81076 | +0.1740321          | 744.906473 |            | 1488.80567 | 14 | G   | 3  | 442.277244 | -0.0428687 | 442.277244          |            |
|            | 1557.86352 |                     | 1585.85843 |            | 1585.85843 | 15 | P   | 2  | 385.25578  | -0.0483215 | 385.25578           |            |
|            | 1670.94758 |                     | 1698.9425  |            | 1698.9425  | 16 | I   | 1  | 288.203016 |            | 288.203016          |            |
|            |            |                     |            |            |            | 17 | R   | 0  | 175.118952 |            | 175.118952          |            |

general information

|                       |             |
|-----------------------|-------------|
| Annotation:           | 13 of 17    |
| AminoAcids Coverage:  | 76 %        |
| Intensity Coverage:   | 66 %        |
| Peak Coverage:        | 24 %        |
| Protein Localisation: | 113 ... 129 |

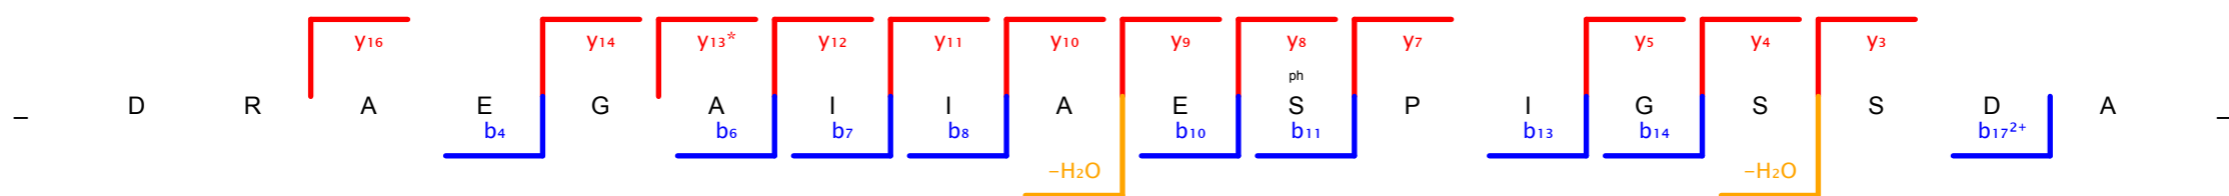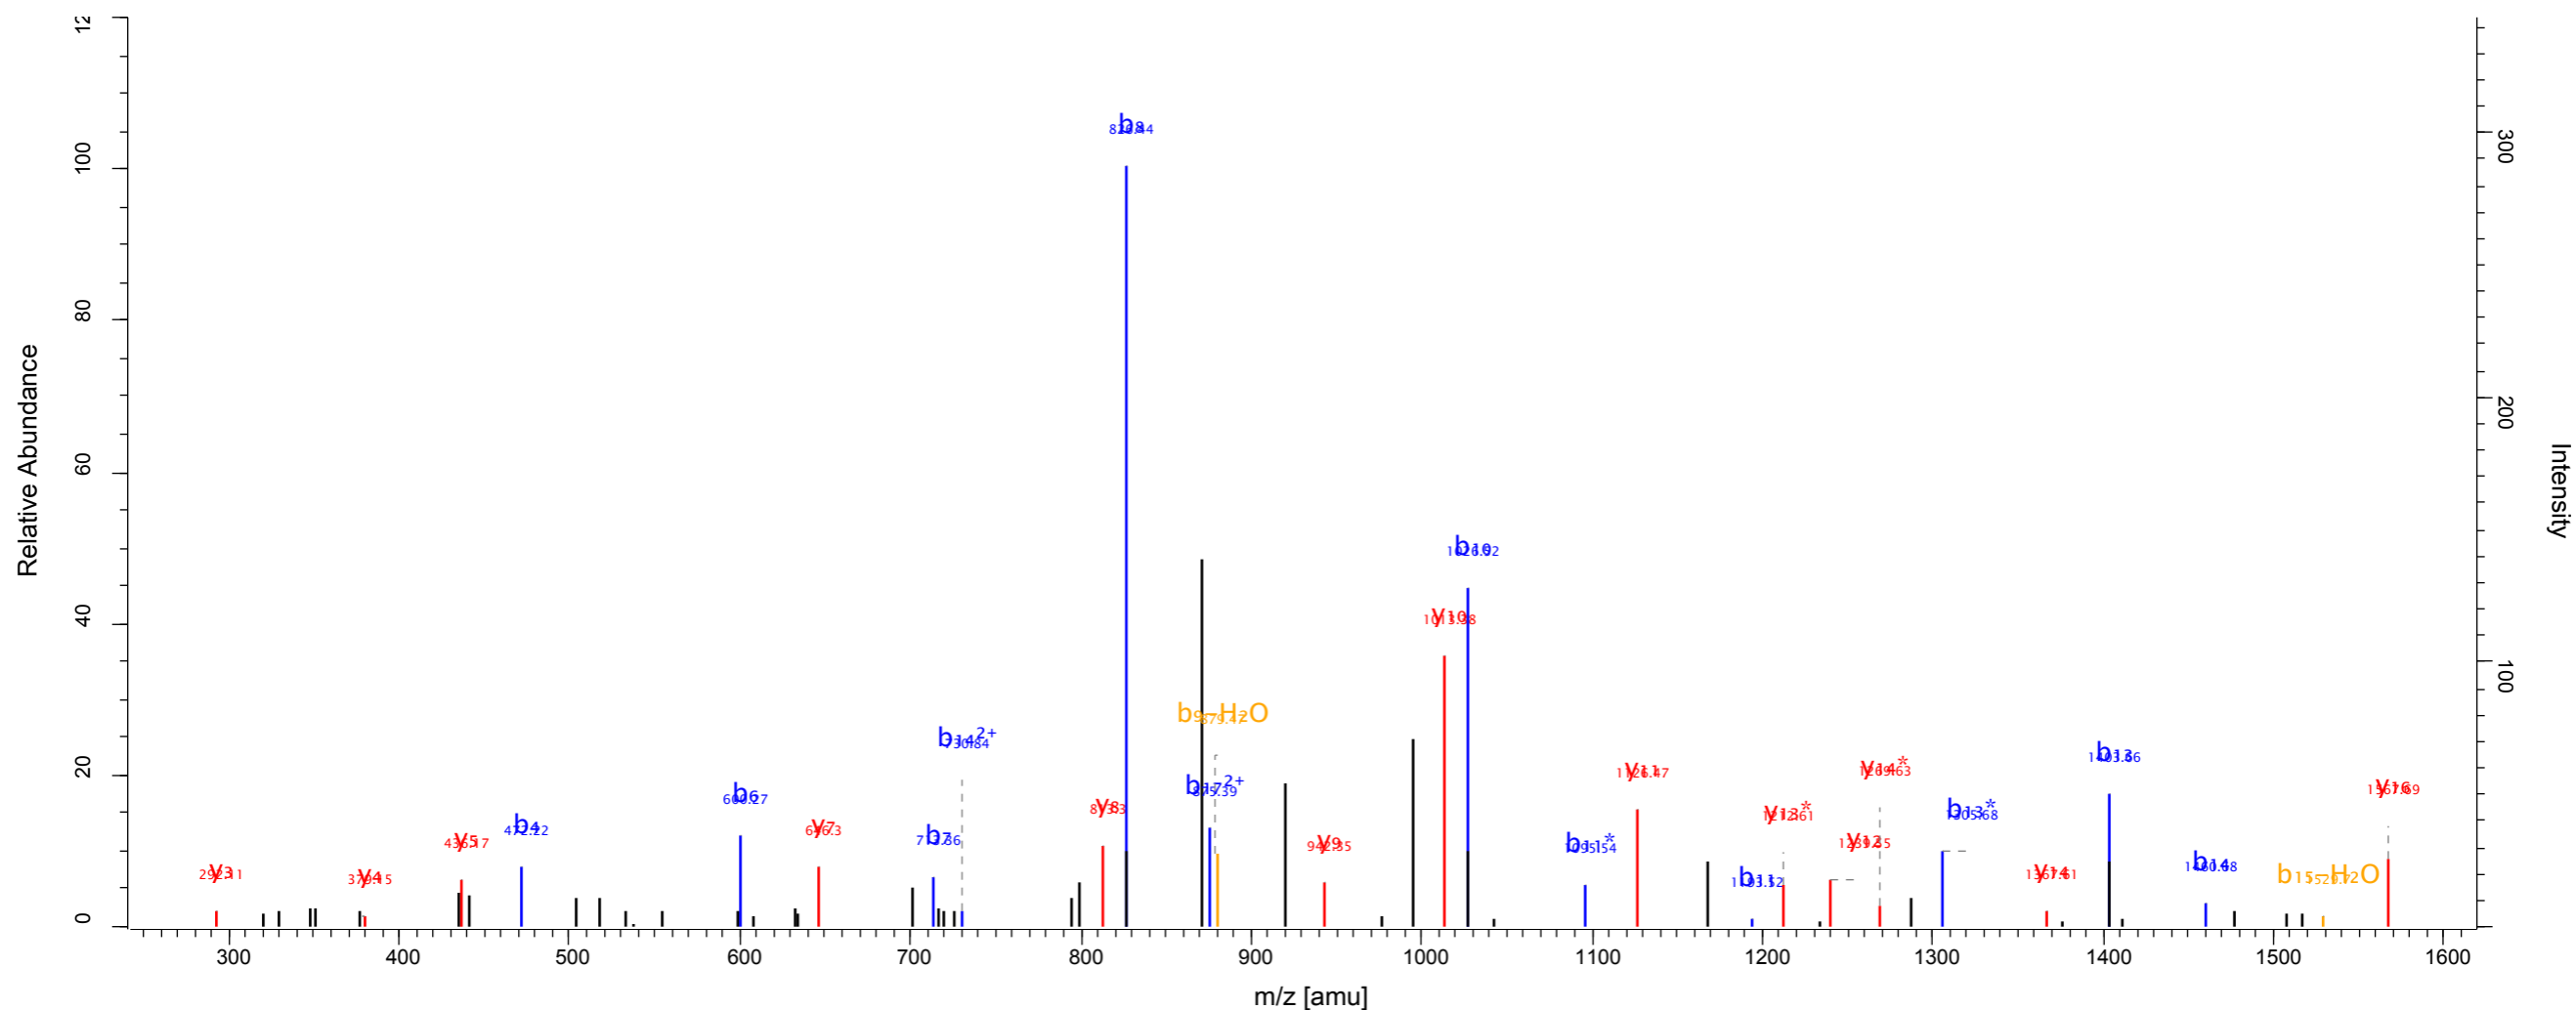

precursor information

|                   |                  |
|-------------------|------------------|
| Mass:             | 1827.80004       |
| m/z:              | 919.01170        |
| Charge:           | 2+               |
| Potenttime:       | 04.5001047021484 |
| Score:            | 128.650          |
| Mass Error (ppm): | 0.25202          |
| DEP:              | 0.042422         |
| Precursor Type:   | MULTI            |

general information

|                       |             |
|-----------------------|-------------|
| Annotation:           | 15 of 18    |
| AminoAcids Coverage:  | 82%         |
| Intensity Coverage:   | 62%         |
| Peak Coverage:        | 42%         |
| Protein Localisation: | 473 ... 490 |

| b <sup>2+</sup> ion |                | b ion      |                |    |     |    | y ion          |            |
|---------------------|----------------|------------|----------------|----|-----|----|----------------|------------|
| Δ dalton            | mass           | Δ dalton   | mass           |    | seq |    | Δ dalton       | mass       |
|                     | 116.034219499  |            | 116.034219499  | 1  | D   | 17 |                |            |
|                     | 272.135330527  |            | 272.135330527  | 2  | R   | 16 | 1723.789835435 |            |
|                     | 343.172444314  |            | 343.172444314  | 3  | A   | 15 | 1567.688724407 | +0.1949426 |
|                     | 472.215037411  | +0.0239152 | 472.215037411  | 4  | E   | 14 | 1496.651610619 |            |
|                     | 529.236501134  |            | 529.236501134  | 5  | G   | 13 | 1367.609017523 | -0.231454  |
|                     | 600.273614922  | +0.0523128 | 600.273614922  | 6  | A   | 12 | 1310.587553799 |            |
|                     | 713.357678902  | -0.0426765 | 713.357678902  | 7  | I   | 11 | 1239.550440012 | +0.1949213 |
|                     | 826.441742883  | +0.0036917 | 826.441742883  | 8  | I   | 10 | 1126.466376031 | -0.3508975 |
|                     | 897.478856671  |            | 897.478856671  | 9  | A   | 9  | 1013.382312051 | -0.0757325 |
|                     | 1026.521449767 | +0.1080668 | 1026.521449767 | 10 | E   | 8  | 942.345198263  | +0.0393232 |
|                     | 1193.519808585 | -0.0090664 | 1193.519808585 | 11 | S   | 7  | 813.302605167  | +0.0476756 |
|                     | 1290.572572437 |            | 1290.572572437 | 12 | P   | 6  | 646.304246348  | -0.0884871 |
|                     | 1403.656636418 | -0.0543415 | 1403.656636418 | 13 | I   | 5  | 549.251482496  |            |
| -0.2365482          | 730.842688304  | +0.1973881 | 1460.678100141 | 14 | G   | 4  | 436.167418516  | -0.013732  |
|                     | 1547.710128551 |            | 1547.710128551 | 15 | S   | 3  | 379.145954793  | +0.286876  |
|                     | 1634.742156961 |            | 1634.742156961 | 16 | S   | 2  | 292.113926383  | +0.1091571 |
| -0.0529221          | 875.38818823   |            | 1749.769099993 | 17 | D   | 1  | 205.081897973  |            |
|                     |                |            |                | 18 | A   | 0  | 90.054954941   |            |
