# Supplementary material
Source: PubMed Central journal article supplement (PMC3861710)

Zanivan et al. Figure S1

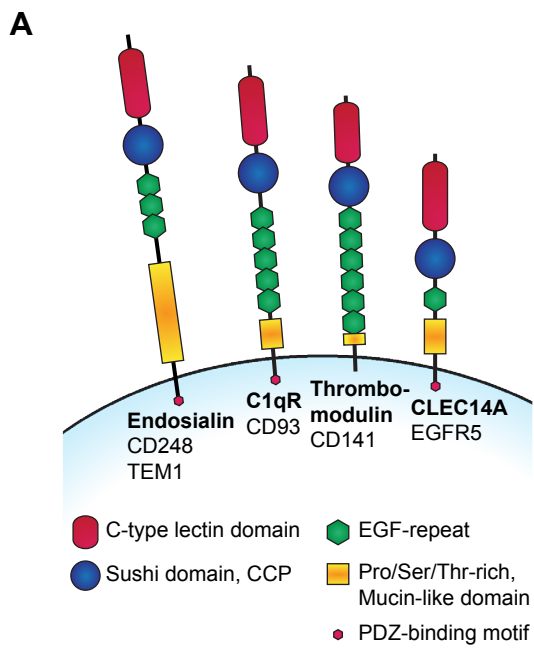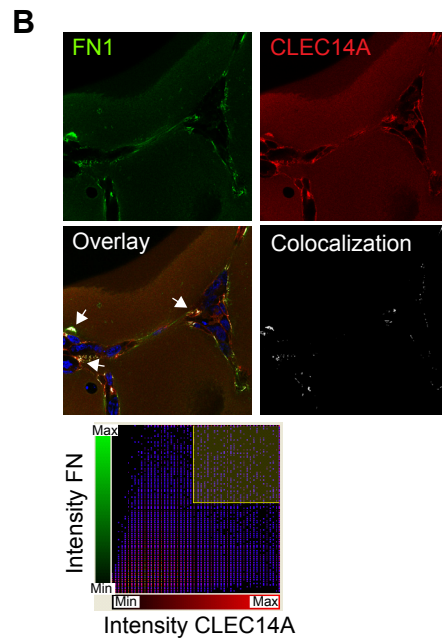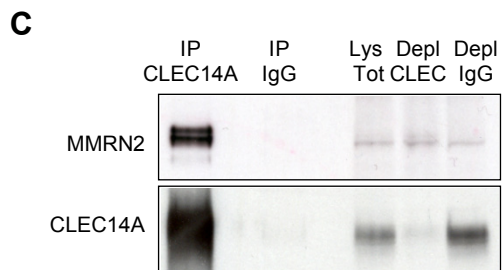

Supplement: supp_M113.031344_mcp.M113.031344-1.pdf [file supp_M113.031344_mcp.M113.031344-1.pdf]

Zanivan et al. Figure S2

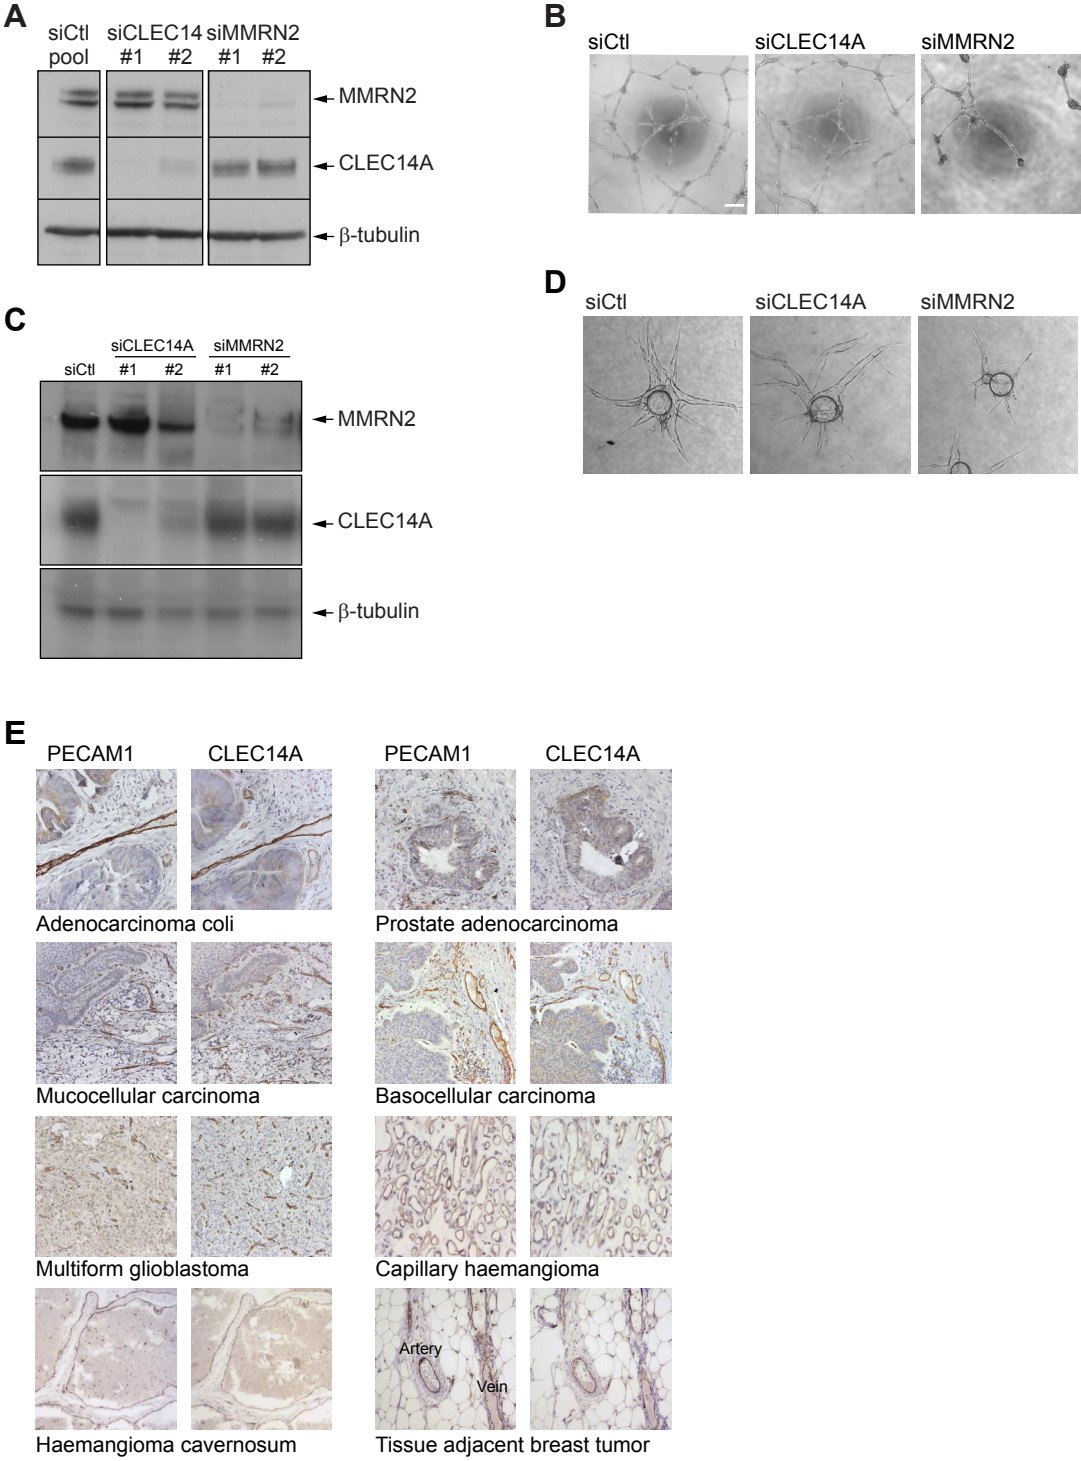

Supplement: supp_M113.031344_mcp.M113.031344-2.pdf [file supp_M113.031344_mcp.M113.031344-2.pdf]

Zanivan et al. Figure S3

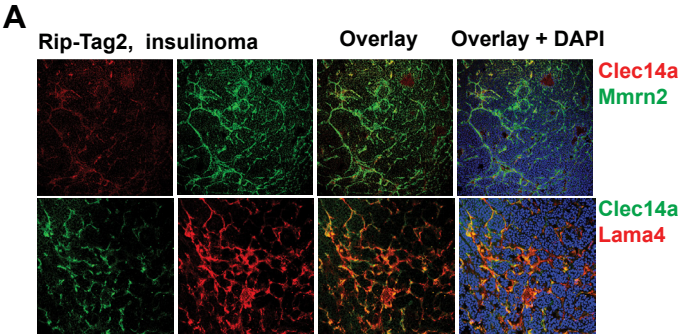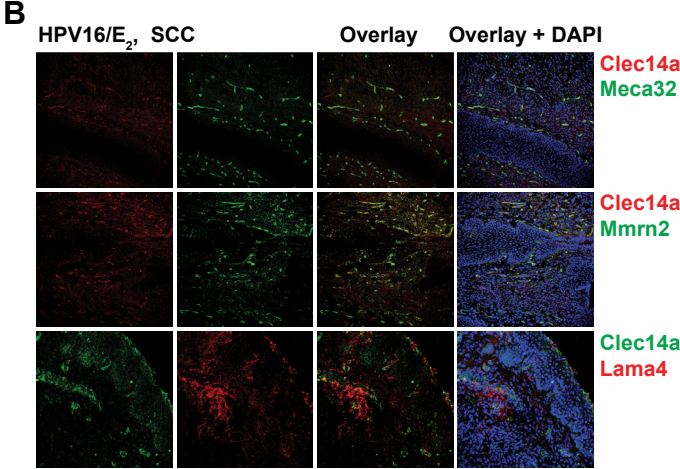

Supplement: supp_M113.031344_mcp.M113.031344-3.pdf [file supp_M113.031344_mcp.M113.031344-3.pdf]
